# Supplementary material
Source: PubMed Central journal article supplement (PMC8187305)
Supplement: NIHMS1695642-supplement-2.pdf [file NIHMS1695642-supplement-2.pdf]

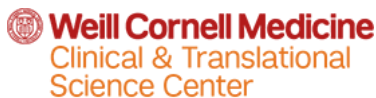

**WEILL CORNELL REGISTRY AND BIOBANK OF CRITICALLY ILL PATIENTS**

Codebook ▾

**Data Dictionary Codebook**

10/07/2020 12:38pm

| #                                                                                                                    | Variable / Field Name          | Field Label<br><i>Field Note</i>                                                  | Field Attributes (Field Type, Validation, Choices, Calculations, etc.)                                                                                                                                                                                                                                                                                        |   |                    |   |                        |   |                     |   |          |   |                                |   |       |   |                       |
|----------------------------------------------------------------------------------------------------------------------|--------------------------------|-----------------------------------------------------------------------------------|---------------------------------------------------------------------------------------------------------------------------------------------------------------------------------------------------------------------------------------------------------------------------------------------------------------------------------------------------------------|---|--------------------|---|------------------------|---|---------------------|---|----------|---|--------------------------------|---|-------|---|-----------------------|
| Instrument: <b>Personal Information Screening And Demographics</b> (personal_information_screening_and_demographics) |                                |                                                                                   |                                                                                                                                                                                                                                                                                                                                                               |   |                    |   |                        |   |                     |   |          |   |                                |   |       |   |                       |
| 1                                                                                                                    | subject_id                     | Subject ID                                                                        | text                                                                                                                                                                                                                                                                                                                                                          |   |                    |   |                        |   |                     |   |          |   |                                |   |       |   |                       |
| 2                                                                                                                    | date                           | Date                                                                              | text (date_mdy)                                                                                                                                                                                                                                                                                                                                               |   |                    |   |                        |   |                     |   |          |   |                                |   |       |   |                       |
| 3                                                                                                                    | medical_record                 | Section Header: <i>Personal Information and Demographics</i><br>Medical Record    | text, Identifier                                                                                                                                                                                                                                                                                                                                              |   |                    |   |                        |   |                     |   |          |   |                                |   |       |   |                       |
| 4                                                                                                                    | empi                           | EMPI                                                                              | text                                                                                                                                                                                                                                                                                                                                                          |   |                    |   |                        |   |                     |   |          |   |                                |   |       |   |                       |
| 5                                                                                                                    | first_name                     | First Name                                                                        | text, Identifier                                                                                                                                                                                                                                                                                                                                              |   |                    |   |                        |   |                     |   |          |   |                                |   |       |   |                       |
| 6                                                                                                                    | last_name                      | Last Name                                                                         | text, Identifier                                                                                                                                                                                                                                                                                                                                              |   |                    |   |                        |   |                     |   |          |   |                                |   |       |   |                       |
| 7                                                                                                                    | date_of_birth                  | Date of Birth                                                                     | text (date_ymd)                                                                                                                                                                                                                                                                                                                                               |   |                    |   |                        |   |                     |   |          |   |                                |   |       |   |                       |
| 8                                                                                                                    | ssn                            | Social Security Number                                                            | text, Identifier                                                                                                                                                                                                                                                                                                                                              |   |                    |   |                        |   |                     |   |          |   |                                |   |       |   |                       |
| 9                                                                                                                    | age_2                          | Age in respect to ICU visit                                                       | calc<br>Calculation: rounddown(datediff([icu_admission_date], [date_of_birth], "y", "ymd"), 0)                                                                                                                                                                                                                                                                |   |                    |   |                        |   |                     |   |          |   |                                |   |       |   |                       |
| 10                                                                                                                   | gender                         | Gender                                                                            | dropdown<br><table border="1"> <tr><td>1</td><td>Male</td></tr> <tr><td>2</td><td>Female</td></tr> <tr><td>3</td><td>Other</td></tr> </table>                                                                                                                                                                                                                 | 1 | Male               | 2 | Female                 | 3 | Other               |   |          |   |                                |   |       |   |                       |
| 1                                                                                                                    | Male                           |                                                                                   |                                                                                                                                                                                                                                                                                                                                                               |   |                    |   |                        |   |                     |   |          |   |                                |   |       |   |                       |
| 2                                                                                                                    | Female                         |                                                                                   |                                                                                                                                                                                                                                                                                                                                                               |   |                    |   |                        |   |                     |   |          |   |                                |   |       |   |                       |
| 3                                                                                                                    | Other                          |                                                                                   |                                                                                                                                                                                                                                                                                                                                                               |   |                    |   |                        |   |                     |   |          |   |                                |   |       |   |                       |
| 11                                                                                                                   | race                           | Race                                                                              | dropdown<br><table border="1"> <tr><td>1</td><td>Asian</td></tr> <tr><td>2</td><td>Black, Non-Hispanic</td></tr> <tr><td>3</td><td>White, Non-Hispanic</td></tr> <tr><td>4</td><td>Hispanic</td></tr> <tr><td>5</td><td>American Indian/Alaskan Native</td></tr> <tr><td>6</td><td>Other</td></tr> <tr><td>7</td><td>Declined/Not recorded</td></tr> </table> | 1 | Asian              | 2 | Black, Non-Hispanic    | 3 | White, Non-Hispanic | 4 | Hispanic | 5 | American Indian/Alaskan Native | 6 | Other | 7 | Declined/Not recorded |
| 1                                                                                                                    | Asian                          |                                                                                   |                                                                                                                                                                                                                                                                                                                                                               |   |                    |   |                        |   |                     |   |          |   |                                |   |       |   |                       |
| 2                                                                                                                    | Black, Non-Hispanic            |                                                                                   |                                                                                                                                                                                                                                                                                                                                                               |   |                    |   |                        |   |                     |   |          |   |                                |   |       |   |                       |
| 3                                                                                                                    | White, Non-Hispanic            |                                                                                   |                                                                                                                                                                                                                                                                                                                                                               |   |                    |   |                        |   |                     |   |          |   |                                |   |       |   |                       |
| 4                                                                                                                    | Hispanic                       |                                                                                   |                                                                                                                                                                                                                                                                                                                                                               |   |                    |   |                        |   |                     |   |          |   |                                |   |       |   |                       |
| 5                                                                                                                    | American Indian/Alaskan Native |                                                                                   |                                                                                                                                                                                                                                                                                                                                                               |   |                    |   |                        |   |                     |   |          |   |                                |   |       |   |                       |
| 6                                                                                                                    | Other                          |                                                                                   |                                                                                                                                                                                                                                                                                                                                                               |   |                    |   |                        |   |                     |   |          |   |                                |   |       |   |                       |
| 7                                                                                                                    | Declined/Not recorded          |                                                                                   |                                                                                                                                                                                                                                                                                                                                                               |   |                    |   |                        |   |                     |   |          |   |                                |   |       |   |                       |
| 12                                                                                                                   | ethnicity_2                    | Ethnicity                                                                         | dropdown<br><table border="1"> <tr><td>1</td><td>Hispanic or Latino</td></tr> <tr><td>2</td><td>Not Hispanic or Latino</td></tr> <tr><td>3</td><td>Declined</td></tr> <tr><td>4</td><td>Unknown</td></tr> </table>                                                                                                                                            | 1 | Hispanic or Latino | 2 | Not Hispanic or Latino | 3 | Declined            | 4 | Unknown  |   |                                |   |       |   |                       |
| 1                                                                                                                    | Hispanic or Latino             |                                                                                   |                                                                                                                                                                                                                                                                                                                                                               |   |                    |   |                        |   |                     |   |          |   |                                |   |       |   |                       |
| 2                                                                                                                    | Not Hispanic or Latino         |                                                                                   |                                                                                                                                                                                                                                                                                                                                                               |   |                    |   |                        |   |                     |   |          |   |                                |   |       |   |                       |
| 3                                                                                                                    | Declined                       |                                                                                   |                                                                                                                                                                                                                                                                                                                                                               |   |                    |   |                        |   |                     |   |          |   |                                |   |       |   |                       |
| 4                                                                                                                    | Unknown                        |                                                                                   |                                                                                                                                                                                                                                                                                                                                                               |   |                    |   |                        |   |                     |   |          |   |                                |   |       |   |                       |
| 13                                                                                                                   | address                        | Address                                                                           | text, Identifier                                                                                                                                                                                                                                                                                                                                              |   |                    |   |                        |   |                     |   |          |   |                                |   |       |   |                       |
| 14                                                                                                                   | phone_number                   | Phone Number                                                                      | text, Identifier                                                                                                                                                                                                                                                                                                                                              |   |                    |   |                        |   |                     |   |          |   |                                |   |       |   |                       |
| 15                                                                                                                   | ed_date                        | ED admission date                                                                 | text (date_mdy)                                                                                                                                                                                                                                                                                                                                               |   |                    |   |                        |   |                     |   |          |   |                                |   |       |   |                       |
| 16                                                                                                                   | ed_hour                        | ED admission Hour                                                                 | text (time)                                                                                                                                                                                                                                                                                                                                                   |   |                    |   |                        |   |                     |   |          |   |                                |   |       |   |                       |
| 17                                                                                                                   | hospital_admission_date        | Hospital Admission Date                                                           | text (date_mdy)                                                                                                                                                                                                                                                                                                                                               |   |                    |   |                        |   |                     |   |          |   |                                |   |       |   |                       |
| 18                                                                                                                   | hospital_admission_hour        | Hospital Admission Hour (0-23)                                                    | text (time)                                                                                                                                                                                                                                                                                                                                                   |   |                    |   |                        |   |                     |   |          |   |                                |   |       |   |                       |
| 19                                                                                                                   | icu_admission_date             | ICU Admission Date                                                                | text (date_ymd)                                                                                                                                                                                                                                                                                                                                               |   |                    |   |                        |   |                     |   |          |   |                                |   |       |   |                       |
| 20                                                                                                                   | icu_admission_hour             | ICU Admission Hour (0-23)                                                         | text (time)                                                                                                                                                                                                                                                                                                                                                   |   |                    |   |                        |   |                     |   |          |   |                                |   |       |   |                       |
| 21                                                                                                                   | exclusion_criteria             | Section Header: <i>Screening And Informed Consent</i><br>Meets Exclusion Criteria | dropdown<br><table border="1"> <tr><td>1</td><td>YES</td></tr> <tr><td>0</td><td>NO</td></tr> </table>                                                                                                                                                                                                                                                        | 1 | YES                | 0 | NO                     |   |                     |   |          |   |                                |   |       |   |                       |
| 1                                                                                                                    | YES                            |                                                                                   |                                                                                                                                                                                                                                                                                                                                                               |   |                    |   |                        |   |                     |   |          |   |                                |   |       |   |                       |
| 0                                                                                                                    | NO                             |                                                                                   |                                                                                                                                                                                                                                                                                                                                                               |   |                    |   |                        |   |                     |   |          |   |                                |   |       |   |                       |

|                                                              |                                                                                             |                                                                   |                                                        |
|--------------------------------------------------------------|---------------------------------------------------------------------------------------------|-------------------------------------------------------------------|--------------------------------------------------------|
| 22                                                           | agreed_consent                                                                              | Agreed to Consent                                                 | dropdown<br>1 YES<br>0 NO                              |
| 23                                                           | direct_indirect_consent<br>Show the field ONLY if:<br>[agreed_consent] = '1'                | Direct/surrogate Consent                                          | dropdown<br>1 Direct<br>2 Surrogate                    |
| 24                                                           | consented_person_name<br>Show the field ONLY if:<br>[direct_indirect_consent] = '2'         | Consented Person First Name                                       | text                                                   |
| 25                                                           | consented_last_name<br>Show the field ONLY if:<br>[direct_indirect_consent] = '2'           | Consented Person Last Name                                        | text                                                   |
| 26                                                           | relationship_consented_person<br>Show the field ONLY if:<br>[direct_indirect_consent] = '2' | Consented person relationship to the subject                      | text                                                   |
| 27                                                           | icf_date                                                                                    | Date of signing of inform consent<br><i>icf date</i>              | text (date_mdy)                                        |
| 28                                                           | informed_consent                                                                            | Informed Consent<br><i>Please upload scanned informed consent</i> | file                                                   |
| 29                                                           | dna                                                                                         | DNA collection authorized                                         | dropdown<br>1 YES<br>0 NO                              |
| 30                                                           | hrv_authorized                                                                              | HRV authorized                                                    | yesno<br>1 Yes<br>0 No                                 |
| 31                                                           | cytocam                                                                                     | Cytocam authorized                                                | yesno<br>1 Yes<br>0 No                                 |
| 32                                                           | recontact                                                                                   | Re-Contact authorized                                             | dropdown<br>1 YES<br>0 NO                              |
| 33                                                           | personal_information_screening_and_demographics_complete                                    | Section Header: <i>Form Status</i><br>Complete?                   | dropdown<br>0 Incomplete<br>1 Unverified<br>2 Complete |
| Instrument: <b>Admission Diagnosis</b> (admission_diagnosis) |                                                                                             |                                                                   |                                                        |

|    |                                                                                           |                                                                              |                                                                                                                                                                                                                                                                                                                                                                                                                                                                                                                                                                                                                                                                                                                                                                                                                                                                                                                                                                                                                                                                                                                                                                                                                                                                                                                                                                                                                                                                                                                                                                                                                                                                                                                                                                          |   |                             |                    |                 |                        |                                          |   |                                        |           |                        |                        |                          |   |                        |             |       |                        |                           |   |                        |                       |   |                        |                       |   |                        |                     |    |                         |            |    |                         |                 |    |                         |              |    |                         |             |    |                         |                      |    |                         |                     |    |                         |                 |    |                         |                   |    |                         |                                |    |                         |        |    |                         |                          |    |                         |                       |
|----|-------------------------------------------------------------------------------------------|------------------------------------------------------------------------------|--------------------------------------------------------------------------------------------------------------------------------------------------------------------------------------------------------------------------------------------------------------------------------------------------------------------------------------------------------------------------------------------------------------------------------------------------------------------------------------------------------------------------------------------------------------------------------------------------------------------------------------------------------------------------------------------------------------------------------------------------------------------------------------------------------------------------------------------------------------------------------------------------------------------------------------------------------------------------------------------------------------------------------------------------------------------------------------------------------------------------------------------------------------------------------------------------------------------------------------------------------------------------------------------------------------------------------------------------------------------------------------------------------------------------------------------------------------------------------------------------------------------------------------------------------------------------------------------------------------------------------------------------------------------------------------------------------------------------------------------------------------------------|---|-----------------------------|--------------------|-----------------|------------------------|------------------------------------------|---|----------------------------------------|-----------|------------------------|------------------------|--------------------------|---|------------------------|-------------|-------|------------------------|---------------------------|---|------------------------|-----------------------|---|------------------------|-----------------------|---|------------------------|---------------------|----|-------------------------|------------|----|-------------------------|-----------------|----|-------------------------|--------------|----|-------------------------|-------------|----|-------------------------|----------------------|----|-------------------------|---------------------|----|-------------------------|-----------------|----|-------------------------|-------------------|----|-------------------------|--------------------------------|----|-------------------------|--------|----|-------------------------|--------------------------|----|-------------------------|-----------------------|
| 34 | admission_diagnosis                                                                       | <p>Section Header: <i>Admission diagnosis</i></p> <p>Admission Diagnosis</p> | <p>checkbox</p> <table border="1"> <tr><td>1</td><td>admission_diagnosis__1</td><td>Sepsis - suspected</td></tr> <tr><td>2</td><td>admission_diagnosis__2</td><td>ARDS - Transferred from outside hospital</td></tr> <tr><td>3</td><td>admission_diagnosis__3</td><td>Pneumonia</td></tr> <tr><td>4</td><td>admission_diagnosis__4</td><td>Heart Failure</td></tr> <tr><td>5</td><td>admission_diagnosis__5</td><td>Hypotension</td></tr> <tr><td>6</td><td>admission_diagnosis__6</td><td>Acute Respiratory Failure</td></tr> <tr><td>7</td><td>admission_diagnosis__7</td><td>Altered Mental Status</td></tr> <tr><td>8</td><td>admission_diagnosis__8</td><td>Drug/alcohol overdose</td></tr> <tr><td>9</td><td>admission_diagnosis__9</td><td>Asthma Exacerbation</td></tr> <tr><td>10</td><td>admission_diagnosis__10</td><td>Chest pain</td></tr> <tr><td>11</td><td>admission_diagnosis__11</td><td>Liver Cirrhosis</td></tr> <tr><td>12</td><td>admission_diagnosis__12</td><td>Pancreatitis</td></tr> <tr><td>13</td><td>admission_diagnosis__13</td><td>GI Bleeding</td></tr> <tr><td>14</td><td>admission_diagnosis__14</td><td>Acute Kidney Failure</td></tr> <tr><td>15</td><td>admission_diagnosis__15</td><td>Acute Liver Failure</td></tr> <tr><td>16</td><td>admission_diagnosis__16</td><td>Other Infection</td></tr> <tr><td>17</td><td>admission_diagnosis__17</td><td>COPD exacerbation</td></tr> <tr><td>18</td><td>admission_diagnosis__18</td><td>Chronic non-COPD lung diseases</td></tr> <tr><td>19</td><td>admission_diagnosis__19</td><td>Trauma</td></tr> <tr><td>20</td><td>admission_diagnosis__20</td><td>Cerebro-Vascular disease</td></tr> <tr><td>21</td><td>admission_diagnosis__21</td><td>Diabetic Ketoacidosis</td></tr> </table> | 1 | admission_diagnosis__1      | Sepsis - suspected | 2               | admission_diagnosis__2 | ARDS - Transferred from outside hospital | 3 | admission_diagnosis__3                 | Pneumonia | 4                      | admission_diagnosis__4 | Heart Failure            | 5 | admission_diagnosis__5 | Hypotension | 6     | admission_diagnosis__6 | Acute Respiratory Failure | 7 | admission_diagnosis__7 | Altered Mental Status | 8 | admission_diagnosis__8 | Drug/alcohol overdose | 9 | admission_diagnosis__9 | Asthma Exacerbation | 10 | admission_diagnosis__10 | Chest pain | 11 | admission_diagnosis__11 | Liver Cirrhosis | 12 | admission_diagnosis__12 | Pancreatitis | 13 | admission_diagnosis__13 | GI Bleeding | 14 | admission_diagnosis__14 | Acute Kidney Failure | 15 | admission_diagnosis__15 | Acute Liver Failure | 16 | admission_diagnosis__16 | Other Infection | 17 | admission_diagnosis__17 | COPD exacerbation | 18 | admission_diagnosis__18 | Chronic non-COPD lung diseases | 19 | admission_diagnosis__19 | Trauma | 20 | admission_diagnosis__20 | Cerebro-Vascular disease | 21 | admission_diagnosis__21 | Diabetic Ketoacidosis |
| 1  | admission_diagnosis__1                                                                    | Sepsis - suspected                                                           |                                                                                                                                                                                                                                                                                                                                                                                                                                                                                                                                                                                                                                                                                                                                                                                                                                                                                                                                                                                                                                                                                                                                                                                                                                                                                                                                                                                                                                                                                                                                                                                                                                                                                                                                                                          |   |                             |                    |                 |                        |                                          |   |                                        |           |                        |                        |                          |   |                        |             |       |                        |                           |   |                        |                       |   |                        |                       |   |                        |                     |    |                         |            |    |                         |                 |    |                         |              |    |                         |             |    |                         |                      |    |                         |                     |    |                         |                 |    |                         |                   |    |                         |                                |    |                         |        |    |                         |                          |    |                         |                       |
| 2  | admission_diagnosis__2                                                                    | ARDS - Transferred from outside hospital                                     |                                                                                                                                                                                                                                                                                                                                                                                                                                                                                                                                                                                                                                                                                                                                                                                                                                                                                                                                                                                                                                                                                                                                                                                                                                                                                                                                                                                                                                                                                                                                                                                                                                                                                                                                                                          |   |                             |                    |                 |                        |                                          |   |                                        |           |                        |                        |                          |   |                        |             |       |                        |                           |   |                        |                       |   |                        |                       |   |                        |                     |    |                         |            |    |                         |                 |    |                         |              |    |                         |             |    |                         |                      |    |                         |                     |    |                         |                 |    |                         |                   |    |                         |                                |    |                         |        |    |                         |                          |    |                         |                       |
| 3  | admission_diagnosis__3                                                                    | Pneumonia                                                                    |                                                                                                                                                                                                                                                                                                                                                                                                                                                                                                                                                                                                                                                                                                                                                                                                                                                                                                                                                                                                                                                                                                                                                                                                                                                                                                                                                                                                                                                                                                                                                                                                                                                                                                                                                                          |   |                             |                    |                 |                        |                                          |   |                                        |           |                        |                        |                          |   |                        |             |       |                        |                           |   |                        |                       |   |                        |                       |   |                        |                     |    |                         |            |    |                         |                 |    |                         |              |    |                         |             |    |                         |                      |    |                         |                     |    |                         |                 |    |                         |                   |    |                         |                                |    |                         |        |    |                         |                          |    |                         |                       |
| 4  | admission_diagnosis__4                                                                    | Heart Failure                                                                |                                                                                                                                                                                                                                                                                                                                                                                                                                                                                                                                                                                                                                                                                                                                                                                                                                                                                                                                                                                                                                                                                                                                                                                                                                                                                                                                                                                                                                                                                                                                                                                                                                                                                                                                                                          |   |                             |                    |                 |                        |                                          |   |                                        |           |                        |                        |                          |   |                        |             |       |                        |                           |   |                        |                       |   |                        |                       |   |                        |                     |    |                         |            |    |                         |                 |    |                         |              |    |                         |             |    |                         |                      |    |                         |                     |    |                         |                 |    |                         |                   |    |                         |                                |    |                         |        |    |                         |                          |    |                         |                       |
| 5  | admission_diagnosis__5                                                                    | Hypotension                                                                  |                                                                                                                                                                                                                                                                                                                                                                                                                                                                                                                                                                                                                                                                                                                                                                                                                                                                                                                                                                                                                                                                                                                                                                                                                                                                                                                                                                                                                                                                                                                                                                                                                                                                                                                                                                          |   |                             |                    |                 |                        |                                          |   |                                        |           |                        |                        |                          |   |                        |             |       |                        |                           |   |                        |                       |   |                        |                       |   |                        |                     |    |                         |            |    |                         |                 |    |                         |              |    |                         |             |    |                         |                      |    |                         |                     |    |                         |                 |    |                         |                   |    |                         |                                |    |                         |        |    |                         |                          |    |                         |                       |
| 6  | admission_diagnosis__6                                                                    | Acute Respiratory Failure                                                    |                                                                                                                                                                                                                                                                                                                                                                                                                                                                                                                                                                                                                                                                                                                                                                                                                                                                                                                                                                                                                                                                                                                                                                                                                                                                                                                                                                                                                                                                                                                                                                                                                                                                                                                                                                          |   |                             |                    |                 |                        |                                          |   |                                        |           |                        |                        |                          |   |                        |             |       |                        |                           |   |                        |                       |   |                        |                       |   |                        |                     |    |                         |            |    |                         |                 |    |                         |              |    |                         |             |    |                         |                      |    |                         |                     |    |                         |                 |    |                         |                   |    |                         |                                |    |                         |        |    |                         |                          |    |                         |                       |
| 7  | admission_diagnosis__7                                                                    | Altered Mental Status                                                        |                                                                                                                                                                                                                                                                                                                                                                                                                                                                                                                                                                                                                                                                                                                                                                                                                                                                                                                                                                                                                                                                                                                                                                                                                                                                                                                                                                                                                                                                                                                                                                                                                                                                                                                                                                          |   |                             |                    |                 |                        |                                          |   |                                        |           |                        |                        |                          |   |                        |             |       |                        |                           |   |                        |                       |   |                        |                       |   |                        |                     |    |                         |            |    |                         |                 |    |                         |              |    |                         |             |    |                         |                      |    |                         |                     |    |                         |                 |    |                         |                   |    |                         |                                |    |                         |        |    |                         |                          |    |                         |                       |
| 8  | admission_diagnosis__8                                                                    | Drug/alcohol overdose                                                        |                                                                                                                                                                                                                                                                                                                                                                                                                                                                                                                                                                                                                                                                                                                                                                                                                                                                                                                                                                                                                                                                                                                                                                                                                                                                                                                                                                                                                                                                                                                                                                                                                                                                                                                                                                          |   |                             |                    |                 |                        |                                          |   |                                        |           |                        |                        |                          |   |                        |             |       |                        |                           |   |                        |                       |   |                        |                       |   |                        |                     |    |                         |            |    |                         |                 |    |                         |              |    |                         |             |    |                         |                      |    |                         |                     |    |                         |                 |    |                         |                   |    |                         |                                |    |                         |        |    |                         |                          |    |                         |                       |
| 9  | admission_diagnosis__9                                                                    | Asthma Exacerbation                                                          |                                                                                                                                                                                                                                                                                                                                                                                                                                                                                                                                                                                                                                                                                                                                                                                                                                                                                                                                                                                                                                                                                                                                                                                                                                                                                                                                                                                                                                                                                                                                                                                                                                                                                                                                                                          |   |                             |                    |                 |                        |                                          |   |                                        |           |                        |                        |                          |   |                        |             |       |                        |                           |   |                        |                       |   |                        |                       |   |                        |                     |    |                         |            |    |                         |                 |    |                         |              |    |                         |             |    |                         |                      |    |                         |                     |    |                         |                 |    |                         |                   |    |                         |                                |    |                         |        |    |                         |                          |    |                         |                       |
| 10 | admission_diagnosis__10                                                                   | Chest pain                                                                   |                                                                                                                                                                                                                                                                                                                                                                                                                                                                                                                                                                                                                                                                                                                                                                                                                                                                                                                                                                                                                                                                                                                                                                                                                                                                                                                                                                                                                                                                                                                                                                                                                                                                                                                                                                          |   |                             |                    |                 |                        |                                          |   |                                        |           |                        |                        |                          |   |                        |             |       |                        |                           |   |                        |                       |   |                        |                       |   |                        |                     |    |                         |            |    |                         |                 |    |                         |              |    |                         |             |    |                         |                      |    |                         |                     |    |                         |                 |    |                         |                   |    |                         |                                |    |                         |        |    |                         |                          |    |                         |                       |
| 11 | admission_diagnosis__11                                                                   | Liver Cirrhosis                                                              |                                                                                                                                                                                                                                                                                                                                                                                                                                                                                                                                                                                                                                                                                                                                                                                                                                                                                                                                                                                                                                                                                                                                                                                                                                                                                                                                                                                                                                                                                                                                                                                                                                                                                                                                                                          |   |                             |                    |                 |                        |                                          |   |                                        |           |                        |                        |                          |   |                        |             |       |                        |                           |   |                        |                       |   |                        |                       |   |                        |                     |    |                         |            |    |                         |                 |    |                         |              |    |                         |             |    |                         |                      |    |                         |                     |    |                         |                 |    |                         |                   |    |                         |                                |    |                         |        |    |                         |                          |    |                         |                       |
| 12 | admission_diagnosis__12                                                                   | Pancreatitis                                                                 |                                                                                                                                                                                                                                                                                                                                                                                                                                                                                                                                                                                                                                                                                                                                                                                                                                                                                                                                                                                                                                                                                                                                                                                                                                                                                                                                                                                                                                                                                                                                                                                                                                                                                                                                                                          |   |                             |                    |                 |                        |                                          |   |                                        |           |                        |                        |                          |   |                        |             |       |                        |                           |   |                        |                       |   |                        |                       |   |                        |                     |    |                         |            |    |                         |                 |    |                         |              |    |                         |             |    |                         |                      |    |                         |                     |    |                         |                 |    |                         |                   |    |                         |                                |    |                         |        |    |                         |                          |    |                         |                       |
| 13 | admission_diagnosis__13                                                                   | GI Bleeding                                                                  |                                                                                                                                                                                                                                                                                                                                                                                                                                                                                                                                                                                                                                                                                                                                                                                                                                                                                                                                                                                                                                                                                                                                                                                                                                                                                                                                                                                                                                                                                                                                                                                                                                                                                                                                                                          |   |                             |                    |                 |                        |                                          |   |                                        |           |                        |                        |                          |   |                        |             |       |                        |                           |   |                        |                       |   |                        |                       |   |                        |                     |    |                         |            |    |                         |                 |    |                         |              |    |                         |             |    |                         |                      |    |                         |                     |    |                         |                 |    |                         |                   |    |                         |                                |    |                         |        |    |                         |                          |    |                         |                       |
| 14 | admission_diagnosis__14                                                                   | Acute Kidney Failure                                                         |                                                                                                                                                                                                                                                                                                                                                                                                                                                                                                                                                                                                                                                                                                                                                                                                                                                                                                                                                                                                                                                                                                                                                                                                                                                                                                                                                                                                                                                                                                                                                                                                                                                                                                                                                                          |   |                             |                    |                 |                        |                                          |   |                                        |           |                        |                        |                          |   |                        |             |       |                        |                           |   |                        |                       |   |                        |                       |   |                        |                     |    |                         |            |    |                         |                 |    |                         |              |    |                         |             |    |                         |                      |    |                         |                     |    |                         |                 |    |                         |                   |    |                         |                                |    |                         |        |    |                         |                          |    |                         |                       |
| 15 | admission_diagnosis__15                                                                   | Acute Liver Failure                                                          |                                                                                                                                                                                                                                                                                                                                                                                                                                                                                                                                                                                                                                                                                                                                                                                                                                                                                                                                                                                                                                                                                                                                                                                                                                                                                                                                                                                                                                                                                                                                                                                                                                                                                                                                                                          |   |                             |                    |                 |                        |                                          |   |                                        |           |                        |                        |                          |   |                        |             |       |                        |                           |   |                        |                       |   |                        |                       |   |                        |                     |    |                         |            |    |                         |                 |    |                         |              |    |                         |             |    |                         |                      |    |                         |                     |    |                         |                 |    |                         |                   |    |                         |                                |    |                         |        |    |                         |                          |    |                         |                       |
| 16 | admission_diagnosis__16                                                                   | Other Infection                                                              |                                                                                                                                                                                                                                                                                                                                                                                                                                                                                                                                                                                                                                                                                                                                                                                                                                                                                                                                                                                                                                                                                                                                                                                                                                                                                                                                                                                                                                                                                                                                                                                                                                                                                                                                                                          |   |                             |                    |                 |                        |                                          |   |                                        |           |                        |                        |                          |   |                        |             |       |                        |                           |   |                        |                       |   |                        |                       |   |                        |                     |    |                         |            |    |                         |                 |    |                         |              |    |                         |             |    |                         |                      |    |                         |                     |    |                         |                 |    |                         |                   |    |                         |                                |    |                         |        |    |                         |                          |    |                         |                       |
| 17 | admission_diagnosis__17                                                                   | COPD exacerbation                                                            |                                                                                                                                                                                                                                                                                                                                                                                                                                                                                                                                                                                                                                                                                                                                                                                                                                                                                                                                                                                                                                                                                                                                                                                                                                                                                                                                                                                                                                                                                                                                                                                                                                                                                                                                                                          |   |                             |                    |                 |                        |                                          |   |                                        |           |                        |                        |                          |   |                        |             |       |                        |                           |   |                        |                       |   |                        |                       |   |                        |                     |    |                         |            |    |                         |                 |    |                         |              |    |                         |             |    |                         |                      |    |                         |                     |    |                         |                 |    |                         |                   |    |                         |                                |    |                         |        |    |                         |                          |    |                         |                       |
| 18 | admission_diagnosis__18                                                                   | Chronic non-COPD lung diseases                                               |                                                                                                                                                                                                                                                                                                                                                                                                                                                                                                                                                                                                                                                                                                                                                                                                                                                                                                                                                                                                                                                                                                                                                                                                                                                                                                                                                                                                                                                                                                                                                                                                                                                                                                                                                                          |   |                             |                    |                 |                        |                                          |   |                                        |           |                        |                        |                          |   |                        |             |       |                        |                           |   |                        |                       |   |                        |                       |   |                        |                     |    |                         |            |    |                         |                 |    |                         |              |    |                         |             |    |                         |                      |    |                         |                     |    |                         |                 |    |                         |                   |    |                         |                                |    |                         |        |    |                         |                          |    |                         |                       |
| 19 | admission_diagnosis__19                                                                   | Trauma                                                                       |                                                                                                                                                                                                                                                                                                                                                                                                                                                                                                                                                                                                                                                                                                                                                                                                                                                                                                                                                                                                                                                                                                                                                                                                                                                                                                                                                                                                                                                                                                                                                                                                                                                                                                                                                                          |   |                             |                    |                 |                        |                                          |   |                                        |           |                        |                        |                          |   |                        |             |       |                        |                           |   |                        |                       |   |                        |                       |   |                        |                     |    |                         |            |    |                         |                 |    |                         |              |    |                         |             |    |                         |                      |    |                         |                     |    |                         |                 |    |                         |                   |    |                         |                                |    |                         |        |    |                         |                          |    |                         |                       |
| 20 | admission_diagnosis__20                                                                   | Cerebro-Vascular disease                                                     |                                                                                                                                                                                                                                                                                                                                                                                                                                                                                                                                                                                                                                                                                                                                                                                                                                                                                                                                                                                                                                                                                                                                                                                                                                                                                                                                                                                                                                                                                                                                                                                                                                                                                                                                                                          |   |                             |                    |                 |                        |                                          |   |                                        |           |                        |                        |                          |   |                        |             |       |                        |                           |   |                        |                       |   |                        |                       |   |                        |                     |    |                         |            |    |                         |                 |    |                         |              |    |                         |             |    |                         |                      |    |                         |                     |    |                         |                 |    |                         |                   |    |                         |                                |    |                         |        |    |                         |                          |    |                         |                       |
| 21 | admission_diagnosis__21                                                                   | Diabetic Ketoacidosis                                                        |                                                                                                                                                                                                                                                                                                                                                                                                                                                                                                                                                                                                                                                                                                                                                                                                                                                                                                                                                                                                                                                                                                                                                                                                                                                                                                                                                                                                                                                                                                                                                                                                                                                                                                                                                                          |   |                             |                    |                 |                        |                                          |   |                                        |           |                        |                        |                          |   |                        |             |       |                        |                           |   |                        |                       |   |                        |                       |   |                        |                     |    |                         |            |    |                         |                 |    |                         |              |    |                         |             |    |                         |                      |    |                         |                     |    |                         |                 |    |                         |                   |    |                         |                                |    |                         |        |    |                         |                          |    |                         |                       |
| 35 | <p>type_chest_pain</p> <p>Show the field ONLY if:<br/>[admission_diagnosis(10)] = '1'</p> | Chest Pain (origin suspected)                                                | <p>dropdown</p> <table border="1"> <tr><td>1</td><td>Cardiovascular</td></tr> <tr><td>2</td><td>Respiratory</td></tr> <tr><td>3</td><td>Gastrointestinal</td></tr> <tr><td>4</td><td>Chest wall</td></tr> <tr><td>5</td><td>Psychological</td></tr> <tr><td>6</td><td>Other</td></tr> </table>                                                                                                                                                                                                                                                                                                                                                                                                                                                                                                                                                                                                                                                                                                                                                                                                                                                                                                                                                                                                                                                                                                                                                                                                                                                                                                                                                                                                                                                                           | 1 | Cardiovascular              | 2                  | Respiratory     | 3                      | Gastrointestinal                         | 4 | Chest wall                             | 5         | Psychological          | 6                      | Other                    |   |                        |             |       |                        |                           |   |                        |                       |   |                        |                       |   |                        |                     |    |                         |            |    |                         |                 |    |                         |              |    |                         |             |    |                         |                      |    |                         |                     |    |                         |                 |    |                         |                   |    |                         |                                |    |                         |        |    |                         |                          |    |                         |                       |
| 1  | Cardiovascular                                                                            |                                                                              |                                                                                                                                                                                                                                                                                                                                                                                                                                                                                                                                                                                                                                                                                                                                                                                                                                                                                                                                                                                                                                                                                                                                                                                                                                                                                                                                                                                                                                                                                                                                                                                                                                                                                                                                                                          |   |                             |                    |                 |                        |                                          |   |                                        |           |                        |                        |                          |   |                        |             |       |                        |                           |   |                        |                       |   |                        |                       |   |                        |                     |    |                         |            |    |                         |                 |    |                         |              |    |                         |             |    |                         |                      |    |                         |                     |    |                         |                 |    |                         |                   |    |                         |                                |    |                         |        |    |                         |                          |    |                         |                       |
| 2  | Respiratory                                                                               |                                                                              |                                                                                                                                                                                                                                                                                                                                                                                                                                                                                                                                                                                                                                                                                                                                                                                                                                                                                                                                                                                                                                                                                                                                                                                                                                                                                                                                                                                                                                                                                                                                                                                                                                                                                                                                                                          |   |                             |                    |                 |                        |                                          |   |                                        |           |                        |                        |                          |   |                        |             |       |                        |                           |   |                        |                       |   |                        |                       |   |                        |                     |    |                         |            |    |                         |                 |    |                         |              |    |                         |             |    |                         |                      |    |                         |                     |    |                         |                 |    |                         |                   |    |                         |                                |    |                         |        |    |                         |                          |    |                         |                       |
| 3  | Gastrointestinal                                                                          |                                                                              |                                                                                                                                                                                                                                                                                                                                                                                                                                                                                                                                                                                                                                                                                                                                                                                                                                                                                                                                                                                                                                                                                                                                                                                                                                                                                                                                                                                                                                                                                                                                                                                                                                                                                                                                                                          |   |                             |                    |                 |                        |                                          |   |                                        |           |                        |                        |                          |   |                        |             |       |                        |                           |   |                        |                       |   |                        |                       |   |                        |                     |    |                         |            |    |                         |                 |    |                         |              |    |                         |             |    |                         |                      |    |                         |                     |    |                         |                 |    |                         |                   |    |                         |                                |    |                         |        |    |                         |                          |    |                         |                       |
| 4  | Chest wall                                                                                |                                                                              |                                                                                                                                                                                                                                                                                                                                                                                                                                                                                                                                                                                                                                                                                                                                                                                                                                                                                                                                                                                                                                                                                                                                                                                                                                                                                                                                                                                                                                                                                                                                                                                                                                                                                                                                                                          |   |                             |                    |                 |                        |                                          |   |                                        |           |                        |                        |                          |   |                        |             |       |                        |                           |   |                        |                       |   |                        |                       |   |                        |                     |    |                         |            |    |                         |                 |    |                         |              |    |                         |             |    |                         |                      |    |                         |                     |    |                         |                 |    |                         |                   |    |                         |                                |    |                         |        |    |                         |                          |    |                         |                       |
| 5  | Psychological                                                                             |                                                                              |                                                                                                                                                                                                                                                                                                                                                                                                                                                                                                                                                                                                                                                                                                                                                                                                                                                                                                                                                                                                                                                                                                                                                                                                                                                                                                                                                                                                                                                                                                                                                                                                                                                                                                                                                                          |   |                             |                    |                 |                        |                                          |   |                                        |           |                        |                        |                          |   |                        |             |       |                        |                           |   |                        |                       |   |                        |                       |   |                        |                     |    |                         |            |    |                         |                 |    |                         |              |    |                         |             |    |                         |                      |    |                         |                     |    |                         |                 |    |                         |                   |    |                         |                                |    |                         |        |    |                         |                          |    |                         |                       |
| 6  | Other                                                                                     |                                                                              |                                                                                                                                                                                                                                                                                                                                                                                                                                                                                                                                                                                                                                                                                                                                                                                                                                                                                                                                                                                                                                                                                                                                                                                                                                                                                                                                                                                                                                                                                                                                                                                                                                                                                                                                                                          |   |                             |                    |                 |                        |                                          |   |                                        |           |                        |                        |                          |   |                        |             |       |                        |                           |   |                        |                       |   |                        |                       |   |                        |                     |    |                         |            |    |                         |                 |    |                         |              |    |                         |             |    |                         |                      |    |                         |                     |    |                         |                 |    |                         |                   |    |                         |                                |    |                         |        |    |                         |                          |    |                         |                       |
| 36 | <p>suspected_cardiac</p> <p>Show the field ONLY if:<br/>[type_chest_pain] = '1'</p>       | Cardiovascular suspected cause                                               | <p>dropdown</p> <table border="1"> <tr><td>1</td><td>Acute Myocardial Infarction</td></tr> <tr><td>2</td><td>Unstable angina</td></tr> <tr><td>3</td><td>Pericarditis-cardiac tamponade</td></tr> <tr><td>4</td><td>Miocarditis</td></tr> <tr><td>5</td><td>Aortic Dissection</td></tr> <tr><td>6</td><td>Arrhythmia</td></tr> <tr><td>7</td><td>Aortic Aneurysm</td></tr> <tr><td>8</td><td>other</td></tr> </table>                                                                                                                                                                                                                                                                                                                                                                                                                                                                                                                                                                                                                                                                                                                                                                                                                                                                                                                                                                                                                                                                                                                                                                                                                                                                                                                                                    | 1 | Acute Myocardial Infarction | 2                  | Unstable angina | 3                      | Pericarditis-cardiac tamponade           | 4 | Miocarditis                            | 5         | Aortic Dissection      | 6                      | Arrhythmia               | 7 | Aortic Aneurysm        | 8           | other |                        |                           |   |                        |                       |   |                        |                       |   |                        |                     |    |                         |            |    |                         |                 |    |                         |              |    |                         |             |    |                         |                      |    |                         |                     |    |                         |                 |    |                         |                   |    |                         |                                |    |                         |        |    |                         |                          |    |                         |                       |
| 1  | Acute Myocardial Infarction                                                               |                                                                              |                                                                                                                                                                                                                                                                                                                                                                                                                                                                                                                                                                                                                                                                                                                                                                                                                                                                                                                                                                                                                                                                                                                                                                                                                                                                                                                                                                                                                                                                                                                                                                                                                                                                                                                                                                          |   |                             |                    |                 |                        |                                          |   |                                        |           |                        |                        |                          |   |                        |             |       |                        |                           |   |                        |                       |   |                        |                       |   |                        |                     |    |                         |            |    |                         |                 |    |                         |              |    |                         |             |    |                         |                      |    |                         |                     |    |                         |                 |    |                         |                   |    |                         |                                |    |                         |        |    |                         |                          |    |                         |                       |
| 2  | Unstable angina                                                                           |                                                                              |                                                                                                                                                                                                                                                                                                                                                                                                                                                                                                                                                                                                                                                                                                                                                                                                                                                                                                                                                                                                                                                                                                                                                                                                                                                                                                                                                                                                                                                                                                                                                                                                                                                                                                                                                                          |   |                             |                    |                 |                        |                                          |   |                                        |           |                        |                        |                          |   |                        |             |       |                        |                           |   |                        |                       |   |                        |                       |   |                        |                     |    |                         |            |    |                         |                 |    |                         |              |    |                         |             |    |                         |                      |    |                         |                     |    |                         |                 |    |                         |                   |    |                         |                                |    |                         |        |    |                         |                          |    |                         |                       |
| 3  | Pericarditis-cardiac tamponade                                                            |                                                                              |                                                                                                                                                                                                                                                                                                                                                                                                                                                                                                                                                                                                                                                                                                                                                                                                                                                                                                                                                                                                                                                                                                                                                                                                                                                                                                                                                                                                                                                                                                                                                                                                                                                                                                                                                                          |   |                             |                    |                 |                        |                                          |   |                                        |           |                        |                        |                          |   |                        |             |       |                        |                           |   |                        |                       |   |                        |                       |   |                        |                     |    |                         |            |    |                         |                 |    |                         |              |    |                         |             |    |                         |                      |    |                         |                     |    |                         |                 |    |                         |                   |    |                         |                                |    |                         |        |    |                         |                          |    |                         |                       |
| 4  | Miocarditis                                                                               |                                                                              |                                                                                                                                                                                                                                                                                                                                                                                                                                                                                                                                                                                                                                                                                                                                                                                                                                                                                                                                                                                                                                                                                                                                                                                                                                                                                                                                                                                                                                                                                                                                                                                                                                                                                                                                                                          |   |                             |                    |                 |                        |                                          |   |                                        |           |                        |                        |                          |   |                        |             |       |                        |                           |   |                        |                       |   |                        |                       |   |                        |                     |    |                         |            |    |                         |                 |    |                         |              |    |                         |             |    |                         |                      |    |                         |                     |    |                         |                 |    |                         |                   |    |                         |                                |    |                         |        |    |                         |                          |    |                         |                       |
| 5  | Aortic Dissection                                                                         |                                                                              |                                                                                                                                                                                                                                                                                                                                                                                                                                                                                                                                                                                                                                                                                                                                                                                                                                                                                                                                                                                                                                                                                                                                                                                                                                                                                                                                                                                                                                                                                                                                                                                                                                                                                                                                                                          |   |                             |                    |                 |                        |                                          |   |                                        |           |                        |                        |                          |   |                        |             |       |                        |                           |   |                        |                       |   |                        |                       |   |                        |                     |    |                         |            |    |                         |                 |    |                         |              |    |                         |             |    |                         |                      |    |                         |                     |    |                         |                 |    |                         |                   |    |                         |                                |    |                         |        |    |                         |                          |    |                         |                       |
| 6  | Arrhythmia                                                                                |                                                                              |                                                                                                                                                                                                                                                                                                                                                                                                                                                                                                                                                                                                                                                                                                                                                                                                                                                                                                                                                                                                                                                                                                                                                                                                                                                                                                                                                                                                                                                                                                                                                                                                                                                                                                                                                                          |   |                             |                    |                 |                        |                                          |   |                                        |           |                        |                        |                          |   |                        |             |       |                        |                           |   |                        |                       |   |                        |                       |   |                        |                     |    |                         |            |    |                         |                 |    |                         |              |    |                         |             |    |                         |                      |    |                         |                     |    |                         |                 |    |                         |                   |    |                         |                                |    |                         |        |    |                         |                          |    |                         |                       |
| 7  | Aortic Aneurysm                                                                           |                                                                              |                                                                                                                                                                                                                                                                                                                                                                                                                                                                                                                                                                                                                                                                                                                                                                                                                                                                                                                                                                                                                                                                                                                                                                                                                                                                                                                                                                                                                                                                                                                                                                                                                                                                                                                                                                          |   |                             |                    |                 |                        |                                          |   |                                        |           |                        |                        |                          |   |                        |             |       |                        |                           |   |                        |                       |   |                        |                       |   |                        |                     |    |                         |            |    |                         |                 |    |                         |              |    |                         |             |    |                         |                      |    |                         |                     |    |                         |                 |    |                         |                   |    |                         |                                |    |                         |        |    |                         |                          |    |                         |                       |
| 8  | other                                                                                     |                                                                              |                                                                                                                                                                                                                                                                                                                                                                                                                                                                                                                                                                                                                                                                                                                                                                                                                                                                                                                                                                                                                                                                                                                                                                                                                                                                                                                                                                                                                                                                                                                                                                                                                                                                                                                                                                          |   |                             |                    |                 |                        |                                          |   |                                        |           |                        |                        |                          |   |                        |             |       |                        |                           |   |                        |                       |   |                        |                       |   |                        |                     |    |                         |            |    |                         |                 |    |                         |              |    |                         |             |    |                         |                      |    |                         |                     |    |                         |                 |    |                         |                   |    |                         |                                |    |                         |        |    |                         |                          |    |                         |                       |
| 37 | <p>type_infection</p> <p>Show the field ONLY if:<br/>[admission_diagnosis(16)] = '1'</p>  | <p>Other infection</p> <p><i>Select from options</i></p>                     | <p>dropdown</p> <table border="1"> <tr><td>1</td><td>Neuroinfection</td></tr> <tr><td>2</td><td>Skin</td></tr> <tr><td>3</td><td>Genito/Urinary Tract</td></tr> <tr><td>4</td><td>Respiratory Tract other than Pneumonia</td></tr> <tr><td>5</td><td>Gastrointestinal Tract</td></tr> <tr><td>6</td><td>Joint and bone infection</td></tr> </table>                                                                                                                                                                                                                                                                                                                                                                                                                                                                                                                                                                                                                                                                                                                                                                                                                                                                                                                                                                                                                                                                                                                                                                                                                                                                                                                                                                                                                      | 1 | Neuroinfection              | 2                  | Skin            | 3                      | Genito/Urinary Tract                     | 4 | Respiratory Tract other than Pneumonia | 5         | Gastrointestinal Tract | 6                      | Joint and bone infection |   |                        |             |       |                        |                           |   |                        |                       |   |                        |                       |   |                        |                     |    |                         |            |    |                         |                 |    |                         |              |    |                         |             |    |                         |                      |    |                         |                     |    |                         |                 |    |                         |                   |    |                         |                                |    |                         |        |    |                         |                          |    |                         |                       |
| 1  | Neuroinfection                                                                            |                                                                              |                                                                                                                                                                                                                                                                                                                                                                                                                                                                                                                                                                                                                                                                                                                                                                                                                                                                                                                                                                                                                                                                                                                                                                                                                                                                                                                                                                                                                                                                                                                                                                                                                                                                                                                                                                          |   |                             |                    |                 |                        |                                          |   |                                        |           |                        |                        |                          |   |                        |             |       |                        |                           |   |                        |                       |   |                        |                       |   |                        |                     |    |                         |            |    |                         |                 |    |                         |              |    |                         |             |    |                         |                      |    |                         |                     |    |                         |                 |    |                         |                   |    |                         |                                |    |                         |        |    |                         |                          |    |                         |                       |
| 2  | Skin                                                                                      |                                                                              |                                                                                                                                                                                                                                                                                                                                                                                                                                                                                                                                                                                                                                                                                                                                                                                                                                                                                                                                                                                                                                                                                                                                                                                                                                                                                                                                                                                                                                                                                                                                                                                                                                                                                                                                                                          |   |                             |                    |                 |                        |                                          |   |                                        |           |                        |                        |                          |   |                        |             |       |                        |                           |   |                        |                       |   |                        |                       |   |                        |                     |    |                         |            |    |                         |                 |    |                         |              |    |                         |             |    |                         |                      |    |                         |                     |    |                         |                 |    |                         |                   |    |                         |                                |    |                         |        |    |                         |                          |    |                         |                       |
| 3  | Genito/Urinary Tract                                                                      |                                                                              |                                                                                                                                                                                                                                                                                                                                                                                                                                                                                                                                                                                                                                                                                                                                                                                                                                                                                                                                                                                                                                                                                                                                                                                                                                                                                                                                                                                                                                                                                                                                                                                                                                                                                                                                                                          |   |                             |                    |                 |                        |                                          |   |                                        |           |                        |                        |                          |   |                        |             |       |                        |                           |   |                        |                       |   |                        |                       |   |                        |                     |    |                         |            |    |                         |                 |    |                         |              |    |                         |             |    |                         |                      |    |                         |                     |    |                         |                 |    |                         |                   |    |                         |                                |    |                         |        |    |                         |                          |    |                         |                       |
| 4  | Respiratory Tract other than Pneumonia                                                    |                                                                              |                                                                                                                                                                                                                                                                                                                                                                                                                                                                                                                                                                                                                                                                                                                                                                                                                                                                                                                                                                                                                                                                                                                                                                                                                                                                                                                                                                                                                                                                                                                                                                                                                                                                                                                                                                          |   |                             |                    |                 |                        |                                          |   |                                        |           |                        |                        |                          |   |                        |             |       |                        |                           |   |                        |                       |   |                        |                       |   |                        |                     |    |                         |            |    |                         |                 |    |                         |              |    |                         |             |    |                         |                      |    |                         |                     |    |                         |                 |    |                         |                   |    |                         |                                |    |                         |        |    |                         |                          |    |                         |                       |
| 5  | Gastrointestinal Tract                                                                    |                                                                              |                                                                                                                                                                                                                                                                                                                                                                                                                                                                                                                                                                                                                                                                                                                                                                                                                                                                                                                                                                                                                                                                                                                                                                                                                                                                                                                                                                                                                                                                                                                                                                                                                                                                                                                                                                          |   |                             |                    |                 |                        |                                          |   |                                        |           |                        |                        |                          |   |                        |             |       |                        |                           |   |                        |                       |   |                        |                       |   |                        |                     |    |                         |            |    |                         |                 |    |                         |              |    |                         |             |    |                         |                      |    |                         |                     |    |                         |                 |    |                         |                   |    |                         |                                |    |                         |        |    |                         |                          |    |                         |                       |
| 6  | Joint and bone infection                                                                  |                                                                              |                                                                                                                                                                                                                                                                                                                                                                                                                                                                                                                                                                                                                                                                                                                                                                                                                                                                                                                                                                                                                                                                                                                                                                                                                                                                                                                                                                                                                                                                                                                                                                                                                                                                                                                                                                          |   |                             |                    |                 |                        |                                          |   |                                        |           |                        |                        |                          |   |                        |             |       |                        |                           |   |                        |                       |   |                        |                       |   |                        |                     |    |                         |            |    |                         |                 |    |                         |              |    |                         |             |    |                         |                      |    |                         |                     |    |                         |                 |    |                         |                   |    |                         |                                |    |                         |        |    |                         |                          |    |                         |                       |
| 38 | other_diagnosis                                                                           | <p>Other 1</p> <p><i>If Not Applicable, please write NA</i></p>              | text                                                                                                                                                                                                                                                                                                                                                                                                                                                                                                                                                                                                                                                                                                                                                                                                                                                                                                                                                                                                                                                                                                                                                                                                                                                                                                                                                                                                                                                                                                                                                                                                                                                                                                                                                                     |   |                             |                    |                 |                        |                                          |   |                                        |           |                        |                        |                          |   |                        |             |       |                        |                           |   |                        |                       |   |                        |                       |   |                        |                     |    |                         |            |    |                         |                 |    |                         |              |    |                         |             |    |                         |                      |    |                         |                     |    |                         |                 |    |                         |                   |    |                         |                                |    |                         |        |    |                         |                          |    |                         |                       |
| 39 | other_diagnosis2_d01                                                                      | <p>Other 2</p> <p><i>If Not Applicable, please write NA</i></p>              | text                                                                                                                                                                                                                                                                                                                                                                                                                                                                                                                                                                                                                                                                                                                                                                                                                                                                                                                                                                                                                                                                                                                                                                                                                                                                                                                                                                                                                                                                                                                                                                                                                                                                                                                                                                     |   |                             |                    |                 |                        |                                          |   |                                        |           |                        |                        |                          |   |                        |             |       |                        |                           |   |                        |                       |   |                        |                       |   |                        |                     |    |                         |            |    |                         |                 |    |                         |              |    |                         |             |    |                         |                      |    |                         |                     |    |                         |                 |    |                         |                   |    |                         |                                |    |                         |        |    |                         |                          |    |                         |                       |
| 40 | admission_diagnosis_complete                                                              | <p>Section Header: <i>Form Status</i></p> <p>Complete?</p>                   | <p>dropdown</p> <table border="1"> <tr><td>0</td><td>Incomplete</td></tr> <tr><td>1</td><td>Unverified</td></tr> <tr><td>2</td><td>Complete</td></tr> </table>                                                                                                                                                                                                                                                                                                                                                                                                                                                                                                                                                                                                                                                                                                                                                                                                                                                                                                                                                                                                                                                                                                                                                                                                                                                                                                                                                                                                                                                                                                                                                                                                           | 0 | Incomplete                  | 1                  | Unverified      | 2                      | Complete                                 |   |                                        |           |                        |                        |                          |   |                        |             |       |                        |                           |   |                        |                       |   |                        |                       |   |                        |                     |    |                         |            |    |                         |                 |    |                         |              |    |                         |             |    |                         |                      |    |                         |                     |    |                         |                 |    |                         |                   |    |                         |                                |    |                         |        |    |                         |                          |    |                         |                       |
| 0  | Incomplete                                                                                |                                                                              |                                                                                                                                                                                                                                                                                                                                                                                                                                                                                                                                                                                                                                                                                                                                                                                                                                                                                                                                                                                                                                                                                                                                                                                                                                                                                                                                                                                                                                                                                                                                                                                                                                                                                                                                                                          |   |                             |                    |                 |                        |                                          |   |                                        |           |                        |                        |                          |   |                        |             |       |                        |                           |   |                        |                       |   |                        |                       |   |                        |                     |    |                         |            |    |                         |                 |    |                         |              |    |                         |             |    |                         |                      |    |                         |                     |    |                         |                 |    |                         |                   |    |                         |                                |    |                         |        |    |                         |                          |    |                         |                       |
| 1  | Unverified                                                                                |                                                                              |                                                                                                                                                                                                                                                                                                                                                                                                                                                                                                                                                                                                                                                                                                                                                                                                                                                                                                                                                                                                                                                                                                                                                                                                                                                                                                                                                                                                                                                                                                                                                                                                                                                                                                                                                                          |   |                             |                    |                 |                        |                                          |   |                                        |           |                        |                        |                          |   |                        |             |       |                        |                           |   |                        |                       |   |                        |                       |   |                        |                     |    |                         |            |    |                         |                 |    |                         |              |    |                         |             |    |                         |                      |    |                         |                     |    |                         |                 |    |                         |                   |    |                         |                                |    |                         |        |    |                         |                          |    |                         |                       |
| 2  | Complete                                                                                  |                                                                              |                                                                                                                                                                                                                                                                                                                                                                                                                                                                                                                                                                                                                                                                                                                                                                                                                                                                                                                                                                                                                                                                                                                                                                                                                                                                                                                                                                                                                                                                                                                                                                                                                                                                                                                                                                          |   |                             |                    |                 |                        |                                          |   |                                        |           |                        |                        |                          |   |                        |             |       |                        |                           |   |                        |                       |   |                        |                       |   |                        |                     |    |                         |            |    |                         |                 |    |                         |              |    |                         |             |    |                         |                      |    |                         |                     |    |                         |                 |    |                         |                   |    |                         |                                |    |                         |        |    |                         |                          |    |                         |                       |

| Instrument: <b>Medical History</b> (medical_history) |                                                                          |                                                                |                                                                                                                                                                                                                                                                                                                                                                                                                                                                                                                                                                                                                                                                                                                                                                                                                                                                                                                                                                                                                                                                                                                                                                                                                                                                                                     |   |                    |               |             |                    |              |   |                    |          |     |                    |      |   |                    |                        |   |                    |               |   |                    |                |   |                    |            |   |                    |                   |    |                     |        |    |                     |                                                  |    |                     |                  |    |                     |                       |    |                     |        |    |                     |          |    |                     |                |    |                     |              |
|------------------------------------------------------|--------------------------------------------------------------------------|----------------------------------------------------------------|-----------------------------------------------------------------------------------------------------------------------------------------------------------------------------------------------------------------------------------------------------------------------------------------------------------------------------------------------------------------------------------------------------------------------------------------------------------------------------------------------------------------------------------------------------------------------------------------------------------------------------------------------------------------------------------------------------------------------------------------------------------------------------------------------------------------------------------------------------------------------------------------------------------------------------------------------------------------------------------------------------------------------------------------------------------------------------------------------------------------------------------------------------------------------------------------------------------------------------------------------------------------------------------------------------|---|--------------------|---------------|-------------|--------------------|--------------|---|--------------------|----------|-----|--------------------|------|---|--------------------|------------------------|---|--------------------|---------------|---|--------------------|----------------|---|--------------------|------------|---|--------------------|-------------------|----|---------------------|--------|----|---------------------|--------------------------------------------------|----|---------------------|------------------|----|---------------------|-----------------------|----|---------------------|--------|----|---------------------|----------|----|---------------------|----------------|----|---------------------|--------------|
| 41                                                   | medical_history                                                          | Medical History                                                | checkbox<br><table border="1"> <tr><td>1</td><td>medical_history__1</td><td>Heart disease</td></tr> <tr><td>2</td><td>medical_history__2</td><td>Hypertension</td></tr> <tr><td>3</td><td>medical_history__3</td><td>Diabetes</td></tr> <tr><td>4</td><td>medical_history__4</td><td>COPD</td></tr> <tr><td>5</td><td>medical_history__5</td><td>Chronic Kidney Disease</td></tr> <tr><td>6</td><td>medical_history__6</td><td>Liver disease</td></tr> <tr><td>7</td><td>medical_history__7</td><td>Morbid obesity</td></tr> <tr><td>8</td><td>medical_history__8</td><td>Malignancy</td></tr> <tr><td>9</td><td>medical_history__9</td><td>Immunosuppression</td></tr> <tr><td>10</td><td>medical_history__10</td><td>Asthma</td></tr> <tr><td>11</td><td>medical_history__11</td><td>Known chronic hypoxia, hypercapnia, polycythemia</td></tr> <tr><td>12</td><td>medical_history__12</td><td>Surgical history</td></tr> <tr><td>13</td><td>medical_history__13</td><td>Rheumatologic disease</td></tr> <tr><td>14</td><td>medical_history__14</td><td>Stroke</td></tr> <tr><td>15</td><td>medical_history__15</td><td>Dementia</td></tr> <tr><td>16</td><td>medical_history__16</td><td>Hypothyroidism</td></tr> <tr><td>17</td><td>medical_history__17</td><td>Malnutrition</td></tr> </table> | 1 | medical_history__1 | Heart disease | 2           | medical_history__2 | Hypertension | 3 | medical_history__3 | Diabetes | 4   | medical_history__4 | COPD | 5 | medical_history__5 | Chronic Kidney Disease | 6 | medical_history__6 | Liver disease | 7 | medical_history__7 | Morbid obesity | 8 | medical_history__8 | Malignancy | 9 | medical_history__9 | Immunosuppression | 10 | medical_history__10 | Asthma | 11 | medical_history__11 | Known chronic hypoxia, hypercapnia, polycythemia | 12 | medical_history__12 | Surgical history | 13 | medical_history__13 | Rheumatologic disease | 14 | medical_history__14 | Stroke | 15 | medical_history__15 | Dementia | 16 | medical_history__16 | Hypothyroidism | 17 | medical_history__17 | Malnutrition |
| 1                                                    | medical_history__1                                                       | Heart disease                                                  |                                                                                                                                                                                                                                                                                                                                                                                                                                                                                                                                                                                                                                                                                                                                                                                                                                                                                                                                                                                                                                                                                                                                                                                                                                                                                                     |   |                    |               |             |                    |              |   |                    |          |     |                    |      |   |                    |                        |   |                    |               |   |                    |                |   |                    |            |   |                    |                   |    |                     |        |    |                     |                                                  |    |                     |                  |    |                     |                       |    |                     |        |    |                     |          |    |                     |                |    |                     |              |
| 2                                                    | medical_history__2                                                       | Hypertension                                                   |                                                                                                                                                                                                                                                                                                                                                                                                                                                                                                                                                                                                                                                                                                                                                                                                                                                                                                                                                                                                                                                                                                                                                                                                                                                                                                     |   |                    |               |             |                    |              |   |                    |          |     |                    |      |   |                    |                        |   |                    |               |   |                    |                |   |                    |            |   |                    |                   |    |                     |        |    |                     |                                                  |    |                     |                  |    |                     |                       |    |                     |        |    |                     |          |    |                     |                |    |                     |              |
| 3                                                    | medical_history__3                                                       | Diabetes                                                       |                                                                                                                                                                                                                                                                                                                                                                                                                                                                                                                                                                                                                                                                                                                                                                                                                                                                                                                                                                                                                                                                                                                                                                                                                                                                                                     |   |                    |               |             |                    |              |   |                    |          |     |                    |      |   |                    |                        |   |                    |               |   |                    |                |   |                    |            |   |                    |                   |    |                     |        |    |                     |                                                  |    |                     |                  |    |                     |                       |    |                     |        |    |                     |          |    |                     |                |    |                     |              |
| 4                                                    | medical_history__4                                                       | COPD                                                           |                                                                                                                                                                                                                                                                                                                                                                                                                                                                                                                                                                                                                                                                                                                                                                                                                                                                                                                                                                                                                                                                                                                                                                                                                                                                                                     |   |                    |               |             |                    |              |   |                    |          |     |                    |      |   |                    |                        |   |                    |               |   |                    |                |   |                    |            |   |                    |                   |    |                     |        |    |                     |                                                  |    |                     |                  |    |                     |                       |    |                     |        |    |                     |          |    |                     |                |    |                     |              |
| 5                                                    | medical_history__5                                                       | Chronic Kidney Disease                                         |                                                                                                                                                                                                                                                                                                                                                                                                                                                                                                                                                                                                                                                                                                                                                                                                                                                                                                                                                                                                                                                                                                                                                                                                                                                                                                     |   |                    |               |             |                    |              |   |                    |          |     |                    |      |   |                    |                        |   |                    |               |   |                    |                |   |                    |            |   |                    |                   |    |                     |        |    |                     |                                                  |    |                     |                  |    |                     |                       |    |                     |        |    |                     |          |    |                     |                |    |                     |              |
| 6                                                    | medical_history__6                                                       | Liver disease                                                  |                                                                                                                                                                                                                                                                                                                                                                                                                                                                                                                                                                                                                                                                                                                                                                                                                                                                                                                                                                                                                                                                                                                                                                                                                                                                                                     |   |                    |               |             |                    |              |   |                    |          |     |                    |      |   |                    |                        |   |                    |               |   |                    |                |   |                    |            |   |                    |                   |    |                     |        |    |                     |                                                  |    |                     |                  |    |                     |                       |    |                     |        |    |                     |          |    |                     |                |    |                     |              |
| 7                                                    | medical_history__7                                                       | Morbid obesity                                                 |                                                                                                                                                                                                                                                                                                                                                                                                                                                                                                                                                                                                                                                                                                                                                                                                                                                                                                                                                                                                                                                                                                                                                                                                                                                                                                     |   |                    |               |             |                    |              |   |                    |          |     |                    |      |   |                    |                        |   |                    |               |   |                    |                |   |                    |            |   |                    |                   |    |                     |        |    |                     |                                                  |    |                     |                  |    |                     |                       |    |                     |        |    |                     |          |    |                     |                |    |                     |              |
| 8                                                    | medical_history__8                                                       | Malignancy                                                     |                                                                                                                                                                                                                                                                                                                                                                                                                                                                                                                                                                                                                                                                                                                                                                                                                                                                                                                                                                                                                                                                                                                                                                                                                                                                                                     |   |                    |               |             |                    |              |   |                    |          |     |                    |      |   |                    |                        |   |                    |               |   |                    |                |   |                    |            |   |                    |                   |    |                     |        |    |                     |                                                  |    |                     |                  |    |                     |                       |    |                     |        |    |                     |          |    |                     |                |    |                     |              |
| 9                                                    | medical_history__9                                                       | Immunosuppression                                              |                                                                                                                                                                                                                                                                                                                                                                                                                                                                                                                                                                                                                                                                                                                                                                                                                                                                                                                                                                                                                                                                                                                                                                                                                                                                                                     |   |                    |               |             |                    |              |   |                    |          |     |                    |      |   |                    |                        |   |                    |               |   |                    |                |   |                    |            |   |                    |                   |    |                     |        |    |                     |                                                  |    |                     |                  |    |                     |                       |    |                     |        |    |                     |          |    |                     |                |    |                     |              |
| 10                                                   | medical_history__10                                                      | Asthma                                                         |                                                                                                                                                                                                                                                                                                                                                                                                                                                                                                                                                                                                                                                                                                                                                                                                                                                                                                                                                                                                                                                                                                                                                                                                                                                                                                     |   |                    |               |             |                    |              |   |                    |          |     |                    |      |   |                    |                        |   |                    |               |   |                    |                |   |                    |            |   |                    |                   |    |                     |        |    |                     |                                                  |    |                     |                  |    |                     |                       |    |                     |        |    |                     |          |    |                     |                |    |                     |              |
| 11                                                   | medical_history__11                                                      | Known chronic hypoxia, hypercapnia, polycythemia               |                                                                                                                                                                                                                                                                                                                                                                                                                                                                                                                                                                                                                                                                                                                                                                                                                                                                                                                                                                                                                                                                                                                                                                                                                                                                                                     |   |                    |               |             |                    |              |   |                    |          |     |                    |      |   |                    |                        |   |                    |               |   |                    |                |   |                    |            |   |                    |                   |    |                     |        |    |                     |                                                  |    |                     |                  |    |                     |                       |    |                     |        |    |                     |          |    |                     |                |    |                     |              |
| 12                                                   | medical_history__12                                                      | Surgical history                                               |                                                                                                                                                                                                                                                                                                                                                                                                                                                                                                                                                                                                                                                                                                                                                                                                                                                                                                                                                                                                                                                                                                                                                                                                                                                                                                     |   |                    |               |             |                    |              |   |                    |          |     |                    |      |   |                    |                        |   |                    |               |   |                    |                |   |                    |            |   |                    |                   |    |                     |        |    |                     |                                                  |    |                     |                  |    |                     |                       |    |                     |        |    |                     |          |    |                     |                |    |                     |              |
| 13                                                   | medical_history__13                                                      | Rheumatologic disease                                          |                                                                                                                                                                                                                                                                                                                                                                                                                                                                                                                                                                                                                                                                                                                                                                                                                                                                                                                                                                                                                                                                                                                                                                                                                                                                                                     |   |                    |               |             |                    |              |   |                    |          |     |                    |      |   |                    |                        |   |                    |               |   |                    |                |   |                    |            |   |                    |                   |    |                     |        |    |                     |                                                  |    |                     |                  |    |                     |                       |    |                     |        |    |                     |          |    |                     |                |    |                     |              |
| 14                                                   | medical_history__14                                                      | Stroke                                                         |                                                                                                                                                                                                                                                                                                                                                                                                                                                                                                                                                                                                                                                                                                                                                                                                                                                                                                                                                                                                                                                                                                                                                                                                                                                                                                     |   |                    |               |             |                    |              |   |                    |          |     |                    |      |   |                    |                        |   |                    |               |   |                    |                |   |                    |            |   |                    |                   |    |                     |        |    |                     |                                                  |    |                     |                  |    |                     |                       |    |                     |        |    |                     |          |    |                     |                |    |                     |              |
| 15                                                   | medical_history__15                                                      | Dementia                                                       |                                                                                                                                                                                                                                                                                                                                                                                                                                                                                                                                                                                                                                                                                                                                                                                                                                                                                                                                                                                                                                                                                                                                                                                                                                                                                                     |   |                    |               |             |                    |              |   |                    |          |     |                    |      |   |                    |                        |   |                    |               |   |                    |                |   |                    |            |   |                    |                   |    |                     |        |    |                     |                                                  |    |                     |                  |    |                     |                       |    |                     |        |    |                     |          |    |                     |                |    |                     |              |
| 16                                                   | medical_history__16                                                      | Hypothyroidism                                                 |                                                                                                                                                                                                                                                                                                                                                                                                                                                                                                                                                                                                                                                                                                                                                                                                                                                                                                                                                                                                                                                                                                                                                                                                                                                                                                     |   |                    |               |             |                    |              |   |                    |          |     |                    |      |   |                    |                        |   |                    |               |   |                    |                |   |                    |            |   |                    |                   |    |                     |        |    |                     |                                                  |    |                     |                  |    |                     |                       |    |                     |        |    |                     |          |    |                     |                |    |                     |              |
| 17                                                   | medical_history__17                                                      | Malnutrition                                                   |                                                                                                                                                                                                                                                                                                                                                                                                                                                                                                                                                                                                                                                                                                                                                                                                                                                                                                                                                                                                                                                                                                                                                                                                                                                                                                     |   |                    |               |             |                    |              |   |                    |          |     |                    |      |   |                    |                        |   |                    |               |   |                    |                |   |                    |            |   |                    |                   |    |                     |        |    |                     |                                                  |    |                     |                  |    |                     |                       |    |                     |        |    |                     |          |    |                     |                |    |                     |              |
| 42                                                   | ckd_therapy<br>Show the field ONLY if:<br>[medical_history(5)] = '1'     | Chronic renal replacement therapy                              | dropdown<br><table border="1"> <tr><td>1</td><td>Yes</td></tr> <tr><td>0</td><td>No</td></tr> </table>                                                                                                                                                                                                                                                                                                                                                                                                                                                                                                                                                                                                                                                                                                                                                                                                                                                                                                                                                                                                                                                                                                                                                                                              | 1 | Yes                | 0             | No          |                    |              |   |                    |          |     |                    |      |   |                    |                        |   |                    |               |   |                    |                |   |                    |            |   |                    |                   |    |                     |        |    |                     |                                                  |    |                     |                  |    |                     |                       |    |                     |        |    |                     |          |    |                     |                |    |                     |              |
| 1                                                    | Yes                                                                      |                                                                |                                                                                                                                                                                                                                                                                                                                                                                                                                                                                                                                                                                                                                                                                                                                                                                                                                                                                                                                                                                                                                                                                                                                                                                                                                                                                                     |   |                    |               |             |                    |              |   |                    |          |     |                    |      |   |                    |                        |   |                    |               |   |                    |                |   |                    |            |   |                    |                   |    |                     |        |    |                     |                                                  |    |                     |                  |    |                     |                       |    |                     |        |    |                     |          |    |                     |                |    |                     |              |
| 0                                                    | No                                                                       |                                                                |                                                                                                                                                                                                                                                                                                                                                                                                                                                                                                                                                                                                                                                                                                                                                                                                                                                                                                                                                                                                                                                                                                                                                                                                                                                                                                     |   |                    |               |             |                    |              |   |                    |          |     |                    |      |   |                    |                        |   |                    |               |   |                    |                |   |                    |            |   |                    |                   |    |                     |        |    |                     |                                                  |    |                     |                  |    |                     |                       |    |                     |        |    |                     |          |    |                     |                |    |                     |              |
| 43                                                   | type_malignancy<br>Show the field ONLY if:<br>[medical_history(8)] = '1' | Type of malignancy                                             | dropdown<br><table border="1"> <tr><td>1</td><td>Solid</td></tr> <tr><td>2</td><td>Hematologic</td></tr> </table>                                                                                                                                                                                                                                                                                                                                                                                                                                                                                                                                                                                                                                                                                                                                                                                                                                                                                                                                                                                                                                                                                                                                                                                   | 1 | Solid              | 2             | Hematologic |                    |              |   |                    |          |     |                    |      |   |                    |                        |   |                    |               |   |                    |                |   |                    |            |   |                    |                   |    |                     |        |    |                     |                                                  |    |                     |                  |    |                     |                       |    |                     |        |    |                     |          |    |                     |                |    |                     |              |
| 1                                                    | Solid                                                                    |                                                                |                                                                                                                                                                                                                                                                                                                                                                                                                                                                                                                                                                                                                                                                                                                                                                                                                                                                                                                                                                                                                                                                                                                                                                                                                                                                                                     |   |                    |               |             |                    |              |   |                    |          |     |                    |      |   |                    |                        |   |                    |               |   |                    |                |   |                    |            |   |                    |                   |    |                     |        |    |                     |                                                  |    |                     |                  |    |                     |                       |    |                     |        |    |                     |          |    |                     |                |    |                     |              |
| 2                                                    | Hematologic                                                              |                                                                |                                                                                                                                                                                                                                                                                                                                                                                                                                                                                                                                                                                                                                                                                                                                                                                                                                                                                                                                                                                                                                                                                                                                                                                                                                                                                                     |   |                    |               |             |                    |              |   |                    |          |     |                    |      |   |                    |                        |   |                    |               |   |                    |                |   |                    |            |   |                    |                   |    |                     |        |    |                     |                                                  |    |                     |                  |    |                     |                       |    |                     |        |    |                     |          |    |                     |                |    |                     |              |
| 44                                                   | hemato_malig<br>Show the field ONLY if:<br>[type_malignancy]='2'         | Type of Hematologic Malignancy                                 | radio<br><table border="1"> <tr><td>1</td><td>Leukemia</td></tr> <tr><td>2</td><td>Lymphoma</td></tr> <tr><td>3</td><td>Myeloma</td></tr> <tr><td>4</td><td>Other</td></tr> </table>                                                                                                                                                                                                                                                                                                                                                                                                                                                                                                                                                                                                                                                                                                                                                                                                                                                                                                                                                                                                                                                                                                                | 1 | Leukemia           | 2             | Lymphoma    | 3                  | Myeloma      | 4 | Other              |          |     |                    |      |   |                    |                        |   |                    |               |   |                    |                |   |                    |            |   |                    |                   |    |                     |        |    |                     |                                                  |    |                     |                  |    |                     |                       |    |                     |        |    |                     |          |    |                     |                |    |                     |              |
| 1                                                    | Leukemia                                                                 |                                                                |                                                                                                                                                                                                                                                                                                                                                                                                                                                                                                                                                                                                                                                                                                                                                                                                                                                                                                                                                                                                                                                                                                                                                                                                                                                                                                     |   |                    |               |             |                    |              |   |                    |          |     |                    |      |   |                    |                        |   |                    |               |   |                    |                |   |                    |            |   |                    |                   |    |                     |        |    |                     |                                                  |    |                     |                  |    |                     |                       |    |                     |        |    |                     |          |    |                     |                |    |                     |              |
| 2                                                    | Lymphoma                                                                 |                                                                |                                                                                                                                                                                                                                                                                                                                                                                                                                                                                                                                                                                                                                                                                                                                                                                                                                                                                                                                                                                                                                                                                                                                                                                                                                                                                                     |   |                    |               |             |                    |              |   |                    |          |     |                    |      |   |                    |                        |   |                    |               |   |                    |                |   |                    |            |   |                    |                   |    |                     |        |    |                     |                                                  |    |                     |                  |    |                     |                       |    |                     |        |    |                     |          |    |                     |                |    |                     |              |
| 3                                                    | Myeloma                                                                  |                                                                |                                                                                                                                                                                                                                                                                                                                                                                                                                                                                                                                                                                                                                                                                                                                                                                                                                                                                                                                                                                                                                                                                                                                                                                                                                                                                                     |   |                    |               |             |                    |              |   |                    |          |     |                    |      |   |                    |                        |   |                    |               |   |                    |                |   |                    |            |   |                    |                   |    |                     |        |    |                     |                                                  |    |                     |                  |    |                     |                       |    |                     |        |    |                     |          |    |                     |                |    |                     |              |
| 4                                                    | Other                                                                    |                                                                |                                                                                                                                                                                                                                                                                                                                                                                                                                                                                                                                                                                                                                                                                                                                                                                                                                                                                                                                                                                                                                                                                                                                                                                                                                                                                                     |   |                    |               |             |                    |              |   |                    |          |     |                    |      |   |                    |                        |   |                    |               |   |                    |                |   |                    |            |   |                    |                   |    |                     |        |    |                     |                                                  |    |                     |                  |    |                     |                       |    |                     |        |    |                     |          |    |                     |                |    |                     |              |
| 45                                                   | type_leukemia<br>Show the field ONLY if:<br>[hemato_malig] = '1'         | What type of Leukemia?                                         | radio<br><table border="1"> <tr><td>1</td><td>AML</td></tr> <tr><td>2</td><td>MDS</td></tr> <tr><td>3</td><td>ALL</td></tr> <tr><td>4</td><td>CLL</td></tr> <tr><td>5</td><td>CML</td></tr> </table>                                                                                                                                                                                                                                                                                                                                                                                                                                                                                                                                                                                                                                                                                                                                                                                                                                                                                                                                                                                                                                                                                                | 1 | AML                | 2             | MDS         | 3                  | ALL          | 4 | CLL                | 5        | CML |                    |      |   |                    |                        |   |                    |               |   |                    |                |   |                    |            |   |                    |                   |    |                     |        |    |                     |                                                  |    |                     |                  |    |                     |                       |    |                     |        |    |                     |          |    |                     |                |    |                     |              |
| 1                                                    | AML                                                                      |                                                                |                                                                                                                                                                                                                                                                                                                                                                                                                                                                                                                                                                                                                                                                                                                                                                                                                                                                                                                                                                                                                                                                                                                                                                                                                                                                                                     |   |                    |               |             |                    |              |   |                    |          |     |                    |      |   |                    |                        |   |                    |               |   |                    |                |   |                    |            |   |                    |                   |    |                     |        |    |                     |                                                  |    |                     |                  |    |                     |                       |    |                     |        |    |                     |          |    |                     |                |    |                     |              |
| 2                                                    | MDS                                                                      |                                                                |                                                                                                                                                                                                                                                                                                                                                                                                                                                                                                                                                                                                                                                                                                                                                                                                                                                                                                                                                                                                                                                                                                                                                                                                                                                                                                     |   |                    |               |             |                    |              |   |                    |          |     |                    |      |   |                    |                        |   |                    |               |   |                    |                |   |                    |            |   |                    |                   |    |                     |        |    |                     |                                                  |    |                     |                  |    |                     |                       |    |                     |        |    |                     |          |    |                     |                |    |                     |              |
| 3                                                    | ALL                                                                      |                                                                |                                                                                                                                                                                                                                                                                                                                                                                                                                                                                                                                                                                                                                                                                                                                                                                                                                                                                                                                                                                                                                                                                                                                                                                                                                                                                                     |   |                    |               |             |                    |              |   |                    |          |     |                    |      |   |                    |                        |   |                    |               |   |                    |                |   |                    |            |   |                    |                   |    |                     |        |    |                     |                                                  |    |                     |                  |    |                     |                       |    |                     |        |    |                     |          |    |                     |                |    |                     |              |
| 4                                                    | CLL                                                                      |                                                                |                                                                                                                                                                                                                                                                                                                                                                                                                                                                                                                                                                                                                                                                                                                                                                                                                                                                                                                                                                                                                                                                                                                                                                                                                                                                                                     |   |                    |               |             |                    |              |   |                    |          |     |                    |      |   |                    |                        |   |                    |               |   |                    |                |   |                    |            |   |                    |                   |    |                     |        |    |                     |                                                  |    |                     |                  |    |                     |                       |    |                     |        |    |                     |          |    |                     |                |    |                     |              |
| 5                                                    | CML                                                                      |                                                                |                                                                                                                                                                                                                                                                                                                                                                                                                                                                                                                                                                                                                                                                                                                                                                                                                                                                                                                                                                                                                                                                                                                                                                                                                                                                                                     |   |                    |               |             |                    |              |   |                    |          |     |                    |      |   |                    |                        |   |                    |               |   |                    |                |   |                    |            |   |                    |                   |    |                     |        |    |                     |                                                  |    |                     |                  |    |                     |                       |    |                     |        |    |                     |          |    |                     |                |    |                     |              |
| 46                                                   | cancer_type<br>Show the field ONLY if:<br>[type_malignancy] = '1'        | Type of Cancer                                                 | text                                                                                                                                                                                                                                                                                                                                                                                                                                                                                                                                                                                                                                                                                                                                                                                                                                                                                                                                                                                                                                                                                                                                                                                                                                                                                                |   |                    |               |             |                    |              |   |                    |          |     |                    |      |   |                    |                        |   |                    |               |   |                    |                |   |                    |            |   |                    |                   |    |                     |        |    |                     |                                                  |    |                     |                  |    |                     |                       |    |                     |        |    |                     |          |    |                     |                |    |                     |              |
| 47                                                   | state_cancer<br>Show the field ONLY if:<br>[medical_history(8)] = '1'    | State                                                          | dropdown<br><table border="1"> <tr><td>1</td><td>Active</td></tr> <tr><td>2</td><td>Remission</td></tr> </table>                                                                                                                                                                                                                                                                                                                                                                                                                                                                                                                                                                                                                                                                                                                                                                                                                                                                                                                                                                                                                                                                                                                                                                                    | 1 | Active             | 2             | Remission   |                    |              |   |                    |          |     |                    |      |   |                    |                        |   |                    |               |   |                    |                |   |                    |            |   |                    |                   |    |                     |        |    |                     |                                                  |    |                     |                  |    |                     |                       |    |                     |        |    |                     |          |    |                     |                |    |                     |              |
| 1                                                    | Active                                                                   |                                                                |                                                                                                                                                                                                                                                                                                                                                                                                                                                                                                                                                                                                                                                                                                                                                                                                                                                                                                                                                                                                                                                                                                                                                                                                                                                                                                     |   |                    |               |             |                    |              |   |                    |          |     |                    |      |   |                    |                        |   |                    |               |   |                    |                |   |                    |            |   |                    |                   |    |                     |        |    |                     |                                                  |    |                     |                  |    |                     |                       |    |                     |        |    |                     |          |    |                     |                |    |                     |              |
| 2                                                    | Remission                                                                |                                                                |                                                                                                                                                                                                                                                                                                                                                                                                                                                                                                                                                                                                                                                                                                                                                                                                                                                                                                                                                                                                                                                                                                                                                                                                                                                                                                     |   |                    |               |             |                    |              |   |                    |          |     |                    |      |   |                    |                        |   |                    |               |   |                    |                |   |                    |            |   |                    |                   |    |                     |        |    |                     |                                                  |    |                     |                  |    |                     |                       |    |                     |        |    |                     |          |    |                     |                |    |                     |              |
| 48                                                   | chemotherapy<br>Show the field ONLY if:<br>[medical_history(8)] = '1'    | Current chemotherapy or chemotherapy within the last 3 months? | dropdown<br><table border="1"> <tr><td>0</td><td>No</td></tr> <tr><td>1</td><td>Yes</td></tr> </table>                                                                                                                                                                                                                                                                                                                                                                                                                                                                                                                                                                                                                                                                                                                                                                                                                                                                                                                                                                                                                                                                                                                                                                                              | 0 | No                 | 1             | Yes         |                    |              |   |                    |          |     |                    |      |   |                    |                        |   |                    |               |   |                    |                |   |                    |            |   |                    |                   |    |                     |        |    |                     |                                                  |    |                     |                  |    |                     |                       |    |                     |        |    |                     |          |    |                     |                |    |                     |              |
| 0                                                    | No                                                                       |                                                                |                                                                                                                                                                                                                                                                                                                                                                                                                                                                                                                                                                                                                                                                                                                                                                                                                                                                                                                                                                                                                                                                                                                                                                                                                                                                                                     |   |                    |               |             |                    |              |   |                    |          |     |                    |      |   |                    |                        |   |                    |               |   |                    |                |   |                    |            |   |                    |                   |    |                     |        |    |                     |                                                  |    |                     |                  |    |                     |                       |    |                     |        |    |                     |          |    |                     |                |    |                     |              |
| 1                                                    | Yes                                                                      |                                                                |                                                                                                                                                                                                                                                                                                                                                                                                                                                                                                                                                                                                                                                                                                                                                                                                                                                                                                                                                                                                                                                                                                                                                                                                                                                                                                     |   |                    |               |             |                    |              |   |                    |          |     |                    |      |   |                    |                        |   |                    |               |   |                    |                |   |                    |            |   |                    |                   |    |                     |        |    |                     |                                                  |    |                     |                  |    |                     |                       |    |                     |        |    |                     |          |    |                     |                |    |                     |              |

|    |                                                                                  |                                                                |                                                                                                                                                                                                                                                                                                                                                                                                                                                                                                                                                                                                                                                                                                                                                                                                                                                                                                                                                                                                                                                                                                                                                                                                                                                                                                                                                                                                                                                                                                                                                                                                                                                                                                                                                                                                                                                                                                                                                                                                                                                                                       |   |                                                 |                                              |                                                  |                        |                                                                |   |                                           |             |                                      |                        |                             |   |                        |                                                          |   |                        |                        |   |                        |                    |   |                        |                                           |   |                        |                                                 |    |                         |                                                              |
|----|----------------------------------------------------------------------------------|----------------------------------------------------------------|---------------------------------------------------------------------------------------------------------------------------------------------------------------------------------------------------------------------------------------------------------------------------------------------------------------------------------------------------------------------------------------------------------------------------------------------------------------------------------------------------------------------------------------------------------------------------------------------------------------------------------------------------------------------------------------------------------------------------------------------------------------------------------------------------------------------------------------------------------------------------------------------------------------------------------------------------------------------------------------------------------------------------------------------------------------------------------------------------------------------------------------------------------------------------------------------------------------------------------------------------------------------------------------------------------------------------------------------------------------------------------------------------------------------------------------------------------------------------------------------------------------------------------------------------------------------------------------------------------------------------------------------------------------------------------------------------------------------------------------------------------------------------------------------------------------------------------------------------------------------------------------------------------------------------------------------------------------------------------------------------------------------------------------------------------------------------------------|---|-------------------------------------------------|----------------------------------------------|--------------------------------------------------|------------------------|----------------------------------------------------------------|---|-------------------------------------------|-------------|--------------------------------------|------------------------|-----------------------------|---|------------------------|----------------------------------------------------------|---|------------------------|------------------------|---|------------------------|--------------------|---|------------------------|-------------------------------------------|---|------------------------|-------------------------------------------------|----|-------------------------|--------------------------------------------------------------|
| 49 | immunosuppression<br>Show the field ONLY if:<br>[medical_history(9)] = '1'       | Immunosuppression                                              | checkbox<br><table border="1"> <tr> <td data-bbox="1040 107 1068 142">1</td> <td data-bbox="1068 107 1289 142">immunosuppression__1</td> <td data-bbox="1289 107 1523 142">Prednisone or equivalent = or &gt; 0.3 mg/Kg/d?</td> </tr> <tr> <td data-bbox="1040 170 1068 205">2</td> <td data-bbox="1068 170 1289 205">immunosuppression__2</td> <td data-bbox="1289 170 1523 205">Current chemotherapy or chemotherapy within the last 3 months?</td> </tr> <tr> <td data-bbox="1040 254 1068 289">3</td> <td data-bbox="1068 254 1289 289">immunosuppression__3</td> <td data-bbox="1289 254 1523 289">Neutropenia</td> </tr> <tr> <td data-bbox="1040 296 1068 331">4</td> <td data-bbox="1068 296 1289 331">immunosuppression__4</td> <td data-bbox="1289 296 1523 331">Solid organ transplantation</td> </tr> <tr> <td data-bbox="1040 338 1068 373">5</td> <td data-bbox="1068 338 1289 373">immunosuppression__5</td> <td data-bbox="1289 338 1523 373">Rheumatologic disease in treatment with immunosupresors.</td> </tr> <tr> <td data-bbox="1040 401 1068 436">6</td> <td data-bbox="1068 401 1289 436">immunosuppression__6</td> <td data-bbox="1289 401 1523 436">Bone Marrow transplant</td> </tr> <tr> <td data-bbox="1040 443 1068 478">7</td> <td data-bbox="1068 443 1289 478">immunosuppression__7</td> <td data-bbox="1289 443 1523 478">HIV with CD4 &lt; 500</td> </tr> <tr> <td data-bbox="1040 485 1068 520">8</td> <td data-bbox="1068 485 1289 520">immunosuppression__8</td> <td data-bbox="1289 485 1523 520">Leukemia/Myeloma within the last 6 months</td> </tr> <tr> <td data-bbox="1040 527 1068 562">9</td> <td data-bbox="1068 527 1289 562">immunosuppression__9</td> <td data-bbox="1289 527 1523 562">Non-Hodgkin's Lymphoma within the last 6 months</td> </tr> <tr> <td data-bbox="1040 590 1068 625">10</td> <td data-bbox="1068 590 1289 625">immunosuppression__10</td> <td data-bbox="1289 590 1523 625">Solid tumor with metastatic disease within the last 6 months</td> </tr> </table>                                                   | 1 | immunosuppression__1                            | Prednisone or equivalent = or > 0.3 mg/Kg/d? | 2                                                | immunosuppression__2   | Current chemotherapy or chemotherapy within the last 3 months? | 3 | immunosuppression__3                      | Neutropenia | 4                                    | immunosuppression__4   | Solid organ transplantation | 5 | immunosuppression__5   | Rheumatologic disease in treatment with immunosupresors. | 6 | immunosuppression__6   | Bone Marrow transplant | 7 | immunosuppression__7   | HIV with CD4 < 500 | 8 | immunosuppression__8   | Leukemia/Myeloma within the last 6 months | 9 | immunosuppression__9   | Non-Hodgkin's Lymphoma within the last 6 months | 10 | immunosuppression__10   | Solid tumor with metastatic disease within the last 6 months |
| 1  | immunosuppression__1                                                             | Prednisone or equivalent = or > 0.3 mg/Kg/d?                   |                                                                                                                                                                                                                                                                                                                                                                                                                                                                                                                                                                                                                                                                                                                                                                                                                                                                                                                                                                                                                                                                                                                                                                                                                                                                                                                                                                                                                                                                                                                                                                                                                                                                                                                                                                                                                                                                                                                                                                                                                                                                                       |   |                                                 |                                              |                                                  |                        |                                                                |   |                                           |             |                                      |                        |                             |   |                        |                                                          |   |                        |                        |   |                        |                    |   |                        |                                           |   |                        |                                                 |    |                         |                                                              |
| 2  | immunosuppression__2                                                             | Current chemotherapy or chemotherapy within the last 3 months? |                                                                                                                                                                                                                                                                                                                                                                                                                                                                                                                                                                                                                                                                                                                                                                                                                                                                                                                                                                                                                                                                                                                                                                                                                                                                                                                                                                                                                                                                                                                                                                                                                                                                                                                                                                                                                                                                                                                                                                                                                                                                                       |   |                                                 |                                              |                                                  |                        |                                                                |   |                                           |             |                                      |                        |                             |   |                        |                                                          |   |                        |                        |   |                        |                    |   |                        |                                           |   |                        |                                                 |    |                         |                                                              |
| 3  | immunosuppression__3                                                             | Neutropenia                                                    |                                                                                                                                                                                                                                                                                                                                                                                                                                                                                                                                                                                                                                                                                                                                                                                                                                                                                                                                                                                                                                                                                                                                                                                                                                                                                                                                                                                                                                                                                                                                                                                                                                                                                                                                                                                                                                                                                                                                                                                                                                                                                       |   |                                                 |                                              |                                                  |                        |                                                                |   |                                           |             |                                      |                        |                             |   |                        |                                                          |   |                        |                        |   |                        |                    |   |                        |                                           |   |                        |                                                 |    |                         |                                                              |
| 4  | immunosuppression__4                                                             | Solid organ transplantation                                    |                                                                                                                                                                                                                                                                                                                                                                                                                                                                                                                                                                                                                                                                                                                                                                                                                                                                                                                                                                                                                                                                                                                                                                                                                                                                                                                                                                                                                                                                                                                                                                                                                                                                                                                                                                                                                                                                                                                                                                                                                                                                                       |   |                                                 |                                              |                                                  |                        |                                                                |   |                                           |             |                                      |                        |                             |   |                        |                                                          |   |                        |                        |   |                        |                    |   |                        |                                           |   |                        |                                                 |    |                         |                                                              |
| 5  | immunosuppression__5                                                             | Rheumatologic disease in treatment with immunosupresors.       |                                                                                                                                                                                                                                                                                                                                                                                                                                                                                                                                                                                                                                                                                                                                                                                                                                                                                                                                                                                                                                                                                                                                                                                                                                                                                                                                                                                                                                                                                                                                                                                                                                                                                                                                                                                                                                                                                                                                                                                                                                                                                       |   |                                                 |                                              |                                                  |                        |                                                                |   |                                           |             |                                      |                        |                             |   |                        |                                                          |   |                        |                        |   |                        |                    |   |                        |                                           |   |                        |                                                 |    |                         |                                                              |
| 6  | immunosuppression__6                                                             | Bone Marrow transplant                                         |                                                                                                                                                                                                                                                                                                                                                                                                                                                                                                                                                                                                                                                                                                                                                                                                                                                                                                                                                                                                                                                                                                                                                                                                                                                                                                                                                                                                                                                                                                                                                                                                                                                                                                                                                                                                                                                                                                                                                                                                                                                                                       |   |                                                 |                                              |                                                  |                        |                                                                |   |                                           |             |                                      |                        |                             |   |                        |                                                          |   |                        |                        |   |                        |                    |   |                        |                                           |   |                        |                                                 |    |                         |                                                              |
| 7  | immunosuppression__7                                                             | HIV with CD4 < 500                                             |                                                                                                                                                                                                                                                                                                                                                                                                                                                                                                                                                                                                                                                                                                                                                                                                                                                                                                                                                                                                                                                                                                                                                                                                                                                                                                                                                                                                                                                                                                                                                                                                                                                                                                                                                                                                                                                                                                                                                                                                                                                                                       |   |                                                 |                                              |                                                  |                        |                                                                |   |                                           |             |                                      |                        |                             |   |                        |                                                          |   |                        |                        |   |                        |                    |   |                        |                                           |   |                        |                                                 |    |                         |                                                              |
| 8  | immunosuppression__8                                                             | Leukemia/Myeloma within the last 6 months                      |                                                                                                                                                                                                                                                                                                                                                                                                                                                                                                                                                                                                                                                                                                                                                                                                                                                                                                                                                                                                                                                                                                                                                                                                                                                                                                                                                                                                                                                                                                                                                                                                                                                                                                                                                                                                                                                                                                                                                                                                                                                                                       |   |                                                 |                                              |                                                  |                        |                                                                |   |                                           |             |                                      |                        |                             |   |                        |                                                          |   |                        |                        |   |                        |                    |   |                        |                                           |   |                        |                                                 |    |                         |                                                              |
| 9  | immunosuppression__9                                                             | Non-Hodgkin's Lymphoma within the last 6 months                |                                                                                                                                                                                                                                                                                                                                                                                                                                                                                                                                                                                                                                                                                                                                                                                                                                                                                                                                                                                                                                                                                                                                                                                                                                                                                                                                                                                                                                                                                                                                                                                                                                                                                                                                                                                                                                                                                                                                                                                                                                                                                       |   |                                                 |                                              |                                                  |                        |                                                                |   |                                           |             |                                      |                        |                             |   |                        |                                                          |   |                        |                        |   |                        |                    |   |                        |                                           |   |                        |                                                 |    |                         |                                                              |
| 10 | immunosuppression__10                                                            | Solid tumor with metastatic disease within the last 6 months   |                                                                                                                                                                                                                                                                                                                                                                                                                                                                                                                                                                                                                                                                                                                                                                                                                                                                                                                                                                                                                                                                                                                                                                                                                                                                                                                                                                                                                                                                                                                                                                                                                                                                                                                                                                                                                                                                                                                                                                                                                                                                                       |   |                                                 |                                              |                                                  |                        |                                                                |   |                                           |             |                                      |                        |                             |   |                        |                                                          |   |                        |                        |   |                        |                    |   |                        |                                           |   |                        |                                                 |    |                         |                                                              |
| 50 | immunosuppression_2<br>Show the field ONLY if:<br>[medical_history(9)] = '1'     | Immunosuppression                                              | checkbox<br><table border="1"> <tr> <td data-bbox="1040 716 1068 751">1</td> <td data-bbox="1068 716 1289 751">immunosuppression_2__1</td> <td data-bbox="1289 716 1523 751">Prednisone or equivalent = or &gt; 0.3 mg/Kg/d?</td> </tr> <tr> <td data-bbox="1040 779 1068 814">2</td> <td data-bbox="1068 779 1289 814">immunosuppression_2__2</td> <td data-bbox="1289 779 1523 814">Current chemotherapy or chemotherapy within the last 3 months?</td> </tr> <tr> <td data-bbox="1040 863 1068 898">3</td> <td data-bbox="1068 863 1289 898">immunosuppression_2__3</td> <td data-bbox="1289 863 1523 898">Neutropenia</td> </tr> <tr> <td data-bbox="1040 905 1068 940">4</td> <td data-bbox="1068 905 1289 940">immunosuppression_2__4</td> <td data-bbox="1289 905 1523 940">Solid organ transplantation</td> </tr> <tr> <td data-bbox="1040 947 1068 982">5</td> <td data-bbox="1068 947 1289 982">immunosuppression_2__5</td> <td data-bbox="1289 947 1523 982">Rheumatologic disease in treatment with immunosupresors.</td> </tr> <tr> <td data-bbox="1040 1031 1068 1066">6</td> <td data-bbox="1068 1031 1289 1066">immunosuppression_2__6</td> <td data-bbox="1289 1031 1523 1066">Bone Marrow transplant</td> </tr> <tr> <td data-bbox="1040 1073 1068 1108">7</td> <td data-bbox="1068 1073 1289 1108">immunosuppression_2__7</td> <td data-bbox="1289 1073 1523 1108">HIV with CD4 &lt; 500</td> </tr> <tr> <td data-bbox="1040 1115 1068 1150">8</td> <td data-bbox="1068 1115 1289 1150">immunosuppression_2__8</td> <td data-bbox="1289 1115 1523 1150">Leukemia/Myeloma within the last 6 months</td> </tr> <tr> <td data-bbox="1040 1157 1068 1192">9</td> <td data-bbox="1068 1157 1289 1192">immunosuppression_2__9</td> <td data-bbox="1289 1157 1523 1192">Non-Hodgkin's Lymphoma within the last 6 months</td> </tr> <tr> <td data-bbox="1040 1241 1068 1276">10</td> <td data-bbox="1068 1241 1289 1276">immunosuppression_2__10</td> <td data-bbox="1289 1241 1523 1276">Solid tumor with metastatic disease within the last 6 months</td> </tr> </table> | 1 | immunosuppression_2__1                          | Prednisone or equivalent = or > 0.3 mg/Kg/d? | 2                                                | immunosuppression_2__2 | Current chemotherapy or chemotherapy within the last 3 months? | 3 | immunosuppression_2__3                    | Neutropenia | 4                                    | immunosuppression_2__4 | Solid organ transplantation | 5 | immunosuppression_2__5 | Rheumatologic disease in treatment with immunosupresors. | 6 | immunosuppression_2__6 | Bone Marrow transplant | 7 | immunosuppression_2__7 | HIV with CD4 < 500 | 8 | immunosuppression_2__8 | Leukemia/Myeloma within the last 6 months | 9 | immunosuppression_2__9 | Non-Hodgkin's Lymphoma within the last 6 months | 10 | immunosuppression_2__10 | Solid tumor with metastatic disease within the last 6 months |
| 1  | immunosuppression_2__1                                                           | Prednisone or equivalent = or > 0.3 mg/Kg/d?                   |                                                                                                                                                                                                                                                                                                                                                                                                                                                                                                                                                                                                                                                                                                                                                                                                                                                                                                                                                                                                                                                                                                                                                                                                                                                                                                                                                                                                                                                                                                                                                                                                                                                                                                                                                                                                                                                                                                                                                                                                                                                                                       |   |                                                 |                                              |                                                  |                        |                                                                |   |                                           |             |                                      |                        |                             |   |                        |                                                          |   |                        |                        |   |                        |                    |   |                        |                                           |   |                        |                                                 |    |                         |                                                              |
| 2  | immunosuppression_2__2                                                           | Current chemotherapy or chemotherapy within the last 3 months? |                                                                                                                                                                                                                                                                                                                                                                                                                                                                                                                                                                                                                                                                                                                                                                                                                                                                                                                                                                                                                                                                                                                                                                                                                                                                                                                                                                                                                                                                                                                                                                                                                                                                                                                                                                                                                                                                                                                                                                                                                                                                                       |   |                                                 |                                              |                                                  |                        |                                                                |   |                                           |             |                                      |                        |                             |   |                        |                                                          |   |                        |                        |   |                        |                    |   |                        |                                           |   |                        |                                                 |    |                         |                                                              |
| 3  | immunosuppression_2__3                                                           | Neutropenia                                                    |                                                                                                                                                                                                                                                                                                                                                                                                                                                                                                                                                                                                                                                                                                                                                                                                                                                                                                                                                                                                                                                                                                                                                                                                                                                                                                                                                                                                                                                                                                                                                                                                                                                                                                                                                                                                                                                                                                                                                                                                                                                                                       |   |                                                 |                                              |                                                  |                        |                                                                |   |                                           |             |                                      |                        |                             |   |                        |                                                          |   |                        |                        |   |                        |                    |   |                        |                                           |   |                        |                                                 |    |                         |                                                              |
| 4  | immunosuppression_2__4                                                           | Solid organ transplantation                                    |                                                                                                                                                                                                                                                                                                                                                                                                                                                                                                                                                                                                                                                                                                                                                                                                                                                                                                                                                                                                                                                                                                                                                                                                                                                                                                                                                                                                                                                                                                                                                                                                                                                                                                                                                                                                                                                                                                                                                                                                                                                                                       |   |                                                 |                                              |                                                  |                        |                                                                |   |                                           |             |                                      |                        |                             |   |                        |                                                          |   |                        |                        |   |                        |                    |   |                        |                                           |   |                        |                                                 |    |                         |                                                              |
| 5  | immunosuppression_2__5                                                           | Rheumatologic disease in treatment with immunosupresors.       |                                                                                                                                                                                                                                                                                                                                                                                                                                                                                                                                                                                                                                                                                                                                                                                                                                                                                                                                                                                                                                                                                                                                                                                                                                                                                                                                                                                                                                                                                                                                                                                                                                                                                                                                                                                                                                                                                                                                                                                                                                                                                       |   |                                                 |                                              |                                                  |                        |                                                                |   |                                           |             |                                      |                        |                             |   |                        |                                                          |   |                        |                        |   |                        |                    |   |                        |                                           |   |                        |                                                 |    |                         |                                                              |
| 6  | immunosuppression_2__6                                                           | Bone Marrow transplant                                         |                                                                                                                                                                                                                                                                                                                                                                                                                                                                                                                                                                                                                                                                                                                                                                                                                                                                                                                                                                                                                                                                                                                                                                                                                                                                                                                                                                                                                                                                                                                                                                                                                                                                                                                                                                                                                                                                                                                                                                                                                                                                                       |   |                                                 |                                              |                                                  |                        |                                                                |   |                                           |             |                                      |                        |                             |   |                        |                                                          |   |                        |                        |   |                        |                    |   |                        |                                           |   |                        |                                                 |    |                         |                                                              |
| 7  | immunosuppression_2__7                                                           | HIV with CD4 < 500                                             |                                                                                                                                                                                                                                                                                                                                                                                                                                                                                                                                                                                                                                                                                                                                                                                                                                                                                                                                                                                                                                                                                                                                                                                                                                                                                                                                                                                                                                                                                                                                                                                                                                                                                                                                                                                                                                                                                                                                                                                                                                                                                       |   |                                                 |                                              |                                                  |                        |                                                                |   |                                           |             |                                      |                        |                             |   |                        |                                                          |   |                        |                        |   |                        |                    |   |                        |                                           |   |                        |                                                 |    |                         |                                                              |
| 8  | immunosuppression_2__8                                                           | Leukemia/Myeloma within the last 6 months                      |                                                                                                                                                                                                                                                                                                                                                                                                                                                                                                                                                                                                                                                                                                                                                                                                                                                                                                                                                                                                                                                                                                                                                                                                                                                                                                                                                                                                                                                                                                                                                                                                                                                                                                                                                                                                                                                                                                                                                                                                                                                                                       |   |                                                 |                                              |                                                  |                        |                                                                |   |                                           |             |                                      |                        |                             |   |                        |                                                          |   |                        |                        |   |                        |                    |   |                        |                                           |   |                        |                                                 |    |                         |                                                              |
| 9  | immunosuppression_2__9                                                           | Non-Hodgkin's Lymphoma within the last 6 months                |                                                                                                                                                                                                                                                                                                                                                                                                                                                                                                                                                                                                                                                                                                                                                                                                                                                                                                                                                                                                                                                                                                                                                                                                                                                                                                                                                                                                                                                                                                                                                                                                                                                                                                                                                                                                                                                                                                                                                                                                                                                                                       |   |                                                 |                                              |                                                  |                        |                                                                |   |                                           |             |                                      |                        |                             |   |                        |                                                          |   |                        |                        |   |                        |                    |   |                        |                                           |   |                        |                                                 |    |                         |                                                              |
| 10 | immunosuppression_2__10                                                          | Solid tumor with metastatic disease within the last 6 months   |                                                                                                                                                                                                                                                                                                                                                                                                                                                                                                                                                                                                                                                                                                                                                                                                                                                                                                                                                                                                                                                                                                                                                                                                                                                                                                                                                                                                                                                                                                                                                                                                                                                                                                                                                                                                                                                                                                                                                                                                                                                                                       |   |                                                 |                                              |                                                  |                        |                                                                |   |                                           |             |                                      |                        |                             |   |                        |                                                          |   |                        |                        |   |                        |                    |   |                        |                                           |   |                        |                                                 |    |                         |                                                              |
| 51 | prednisolone                                                                     | Equivalents of Methylprednisolone                              | descriptive                                                                                                                                                                                                                                                                                                                                                                                                                                                                                                                                                                                                                                                                                                                                                                                                                                                                                                                                                                                                                                                                                                                                                                                                                                                                                                                                                                                                                                                                                                                                                                                                                                                                                                                                                                                                                                                                                                                                                                                                                                                                           |   |                                                 |                                              |                                                  |                        |                                                                |   |                                           |             |                                      |                        |                             |   |                        |                                                          |   |                        |                        |   |                        |                    |   |                        |                                           |   |                        |                                                 |    |                         |                                                              |
| 52 | solid_transplantation<br>Show the field ONLY if:<br>[immunosuppression(4)] = '1' | Type of solid organ transplantation                            | dropdown<br><table border="1"> <tr> <td data-bbox="1040 1409 1068 1444">1</td> <td data-bbox="1068 1409 1133 1444">Kidney</td> </tr> <tr> <td data-bbox="1040 1451 1068 1486">2</td> <td data-bbox="1068 1451 1133 1486">Liver</td> </tr> <tr> <td data-bbox="1040 1493 1068 1528">3</td> <td data-bbox="1068 1493 1133 1528">Heart</td> </tr> <tr> <td data-bbox="1040 1535 1068 1570">4</td> <td data-bbox="1068 1535 1133 1570">Lung</td> </tr> </table>                                                                                                                                                                                                                                                                                                                                                                                                                                                                                                                                                                                                                                                                                                                                                                                                                                                                                                                                                                                                                                                                                                                                                                                                                                                                                                                                                                                                                                                                                                                                                                                                                           | 1 | Kidney                                          | 2                                            | Liver                                            | 3                      | Heart                                                          | 4 | Lung                                      |             |                                      |                        |                             |   |                        |                                                          |   |                        |                        |   |                        |                    |   |                        |                                           |   |                        |                                                 |    |                         |                                                              |
| 1  | Kidney                                                                           |                                                                |                                                                                                                                                                                                                                                                                                                                                                                                                                                                                                                                                                                                                                                                                                                                                                                                                                                                                                                                                                                                                                                                                                                                                                                                                                                                                                                                                                                                                                                                                                                                                                                                                                                                                                                                                                                                                                                                                                                                                                                                                                                                                       |   |                                                 |                                              |                                                  |                        |                                                                |   |                                           |             |                                      |                        |                             |   |                        |                                                          |   |                        |                        |   |                        |                    |   |                        |                                           |   |                        |                                                 |    |                         |                                                              |
| 2  | Liver                                                                            |                                                                |                                                                                                                                                                                                                                                                                                                                                                                                                                                                                                                                                                                                                                                                                                                                                                                                                                                                                                                                                                                                                                                                                                                                                                                                                                                                                                                                                                                                                                                                                                                                                                                                                                                                                                                                                                                                                                                                                                                                                                                                                                                                                       |   |                                                 |                                              |                                                  |                        |                                                                |   |                                           |             |                                      |                        |                             |   |                        |                                                          |   |                        |                        |   |                        |                    |   |                        |                                           |   |                        |                                                 |    |                         |                                                              |
| 3  | Heart                                                                            |                                                                |                                                                                                                                                                                                                                                                                                                                                                                                                                                                                                                                                                                                                                                                                                                                                                                                                                                                                                                                                                                                                                                                                                                                                                                                                                                                                                                                                                                                                                                                                                                                                                                                                                                                                                                                                                                                                                                                                                                                                                                                                                                                                       |   |                                                 |                                              |                                                  |                        |                                                                |   |                                           |             |                                      |                        |                             |   |                        |                                                          |   |                        |                        |   |                        |                    |   |                        |                                           |   |                        |                                                 |    |                         |                                                              |
| 4  | Lung                                                                             |                                                                |                                                                                                                                                                                                                                                                                                                                                                                                                                                                                                                                                                                                                                                                                                                                                                                                                                                                                                                                                                                                                                                                                                                                                                                                                                                                                                                                                                                                                                                                                                                                                                                                                                                                                                                                                                                                                                                                                                                                                                                                                                                                                       |   |                                                 |                                              |                                                  |                        |                                                                |   |                                           |             |                                      |                        |                             |   |                        |                                                          |   |                        |                        |   |                        |                    |   |                        |                                           |   |                        |                                                 |    |                         |                                                              |
| 53 | bone_marrow<br>Show the field ONLY if:<br>[immunosuppression(6)] = '1'           | Date of Bone Marrow Transplant                                 | text (date_mdy)                                                                                                                                                                                                                                                                                                                                                                                                                                                                                                                                                                                                                                                                                                                                                                                                                                                                                                                                                                                                                                                                                                                                                                                                                                                                                                                                                                                                                                                                                                                                                                                                                                                                                                                                                                                                                                                                                                                                                                                                                                                                       |   |                                                 |                                              |                                                  |                        |                                                                |   |                                           |             |                                      |                        |                             |   |                        |                                                          |   |                        |                        |   |                        |                    |   |                        |                                           |   |                        |                                                 |    |                         |                                                              |
| 54 | type_of_transplant<br>Show the field ONLY if:<br>[immunosuppression(6)] = '1'    | Type of bone marrow transplant                                 | dropdown<br><table border="1"> <tr> <td data-bbox="1040 1688 1068 1724">1</td> <td data-bbox="1068 1688 1170 1724">Autologous</td> </tr> <tr> <td data-bbox="1040 1730 1068 1766">2</td> <td data-bbox="1068 1730 1170 1766">Allogeneic</td> </tr> </table>                                                                                                                                                                                                                                                                                                                                                                                                                                                                                                                                                                                                                                                                                                                                                                                                                                                                                                                                                                                                                                                                                                                                                                                                                                                                                                                                                                                                                                                                                                                                                                                                                                                                                                                                                                                                                           | 1 | Autologous                                      | 2                                            | Allogeneic                                       |                        |                                                                |   |                                           |             |                                      |                        |                             |   |                        |                                                          |   |                        |                        |   |                        |                    |   |                        |                                           |   |                        |                                                 |    |                         |                                                              |
| 1  | Autologous                                                                       |                                                                |                                                                                                                                                                                                                                                                                                                                                                                                                                                                                                                                                                                                                                                                                                                                                                                                                                                                                                                                                                                                                                                                                                                                                                                                                                                                                                                                                                                                                                                                                                                                                                                                                                                                                                                                                                                                                                                                                                                                                                                                                                                                                       |   |                                                 |                                              |                                                  |                        |                                                                |   |                                           |             |                                      |                        |                             |   |                        |                                                          |   |                        |                        |   |                        |                    |   |                        |                                           |   |                        |                                                 |    |                         |                                                              |
| 2  | Allogeneic                                                                       |                                                                |                                                                                                                                                                                                                                                                                                                                                                                                                                                                                                                                                                                                                                                                                                                                                                                                                                                                                                                                                                                                                                                                                                                                                                                                                                                                                                                                                                                                                                                                                                                                                                                                                                                                                                                                                                                                                                                                                                                                                                                                                                                                                       |   |                                                 |                                              |                                                  |                        |                                                                |   |                                           |             |                                      |                        |                             |   |                        |                                                          |   |                        |                        |   |                        |                    |   |                        |                                           |   |                        |                                                 |    |                         |                                                              |
| 55 | surgery<br>Show the field ONLY if:<br>[medical_history(12)] = '1'                | Surgical History                                               | dropdown<br><table border="1"> <tr> <td data-bbox="1040 1793 1068 1829">1</td> <td data-bbox="1068 1793 1490 1829">Elective operation during the current admission</td> </tr> <tr> <td data-bbox="1040 1835 1068 1871">2</td> <td data-bbox="1068 1835 1490 1871">Emergency operation during the current admission</td> </tr> <tr> <td data-bbox="1040 1877 1068 1913">3</td> <td data-bbox="1068 1877 1490 1913">Elective surgery within the past 30 days</td> </tr> <tr> <td data-bbox="1040 1919 1068 1955">4</td> <td data-bbox="1068 1919 1490 1955">Emergency surgery within the past 30 days</td> </tr> <tr> <td data-bbox="1040 1961 1068 1997">5</td> <td data-bbox="1068 1961 1490 1997">Any surgery within the past 6 months</td> </tr> </table>                                                                                                                                                                                                                                                                                                                                                                                                                                                                                                                                                                                                                                                                                                                                                                                                                                                                                                                                                                                                                                                                                                                                                                                                                                                                                                                           | 1 | Elective operation during the current admission | 2                                            | Emergency operation during the current admission | 3                      | Elective surgery within the past 30 days                       | 4 | Emergency surgery within the past 30 days | 5           | Any surgery within the past 6 months |                        |                             |   |                        |                                                          |   |                        |                        |   |                        |                    |   |                        |                                           |   |                        |                                                 |    |                         |                                                              |
| 1  | Elective operation during the current admission                                  |                                                                |                                                                                                                                                                                                                                                                                                                                                                                                                                                                                                                                                                                                                                                                                                                                                                                                                                                                                                                                                                                                                                                                                                                                                                                                                                                                                                                                                                                                                                                                                                                                                                                                                                                                                                                                                                                                                                                                                                                                                                                                                                                                                       |   |                                                 |                                              |                                                  |                        |                                                                |   |                                           |             |                                      |                        |                             |   |                        |                                                          |   |                        |                        |   |                        |                    |   |                        |                                           |   |                        |                                                 |    |                         |                                                              |
| 2  | Emergency operation during the current admission                                 |                                                                |                                                                                                                                                                                                                                                                                                                                                                                                                                                                                                                                                                                                                                                                                                                                                                                                                                                                                                                                                                                                                                                                                                                                                                                                                                                                                                                                                                                                                                                                                                                                                                                                                                                                                                                                                                                                                                                                                                                                                                                                                                                                                       |   |                                                 |                                              |                                                  |                        |                                                                |   |                                           |             |                                      |                        |                             |   |                        |                                                          |   |                        |                        |   |                        |                    |   |                        |                                           |   |                        |                                                 |    |                         |                                                              |
| 3  | Elective surgery within the past 30 days                                         |                                                                |                                                                                                                                                                                                                                                                                                                                                                                                                                                                                                                                                                                                                                                                                                                                                                                                                                                                                                                                                                                                                                                                                                                                                                                                                                                                                                                                                                                                                                                                                                                                                                                                                                                                                                                                                                                                                                                                                                                                                                                                                                                                                       |   |                                                 |                                              |                                                  |                        |                                                                |   |                                           |             |                                      |                        |                             |   |                        |                                                          |   |                        |                        |   |                        |                    |   |                        |                                           |   |                        |                                                 |    |                         |                                                              |
| 4  | Emergency surgery within the past 30 days                                        |                                                                |                                                                                                                                                                                                                                                                                                                                                                                                                                                                                                                                                                                                                                                                                                                                                                                                                                                                                                                                                                                                                                                                                                                                                                                                                                                                                                                                                                                                                                                                                                                                                                                                                                                                                                                                                                                                                                                                                                                                                                                                                                                                                       |   |                                                 |                                              |                                                  |                        |                                                                |   |                                           |             |                                      |                        |                             |   |                        |                                                          |   |                        |                        |   |                        |                    |   |                        |                                           |   |                        |                                                 |    |                         |                                                              |
| 5  | Any surgery within the past 6 months                                             |                                                                |                                                                                                                                                                                                                                                                                                                                                                                                                                                                                                                                                                                                                                                                                                                                                                                                                                                                                                                                                                                                                                                                                                                                                                                                                                                                                                                                                                                                                                                                                                                                                                                                                                                                                                                                                                                                                                                                                                                                                                                                                                                                                       |   |                                                 |                                              |                                                  |                        |                                                                |   |                                           |             |                                      |                        |                             |   |                        |                                                          |   |                        |                        |   |                        |                    |   |                        |                                           |   |                        |                                                 |    |                         |                                                              |

|    |                                                                              |                                                                                                      |                                                                                                                                                                                                                                                                                                                                                                                                                                                                                                                                                                                                                                                                                                                                                                                                                                                                                                                                                                                                                                                                                     |   |                            |    |                                     |                        |                    |   |                        |                |       |                        |                 |   |                        |               |   |                        |                       |   |                        |                                       |   |                        |       |   |                        |          |   |                        |           |    |                         |               |    |                         |           |    |                         |       |    |                         |         |
|----|------------------------------------------------------------------------------|------------------------------------------------------------------------------------------------------|-------------------------------------------------------------------------------------------------------------------------------------------------------------------------------------------------------------------------------------------------------------------------------------------------------------------------------------------------------------------------------------------------------------------------------------------------------------------------------------------------------------------------------------------------------------------------------------------------------------------------------------------------------------------------------------------------------------------------------------------------------------------------------------------------------------------------------------------------------------------------------------------------------------------------------------------------------------------------------------------------------------------------------------------------------------------------------------|---|----------------------------|----|-------------------------------------|------------------------|--------------------|---|------------------------|----------------|-------|------------------------|-----------------|---|------------------------|---------------|---|------------------------|-----------------------|---|------------------------|---------------------------------------|---|------------------------|-------|---|------------------------|----------|---|------------------------|-----------|----|-------------------------|---------------|----|-------------------------|-----------|----|-------------------------|-------|----|-------------------------|---------|
| 56 | rheumato_disease<br>Show the field ONLY if:<br>[medical_history(13)] = '1'   | Rheumatologic disease                                                                                | dropdown<br><table border="1"> <tr><td>1</td><td>LES</td></tr> <tr><td>2</td><td>Rheumatoid Arthritis</td></tr> <tr><td>3</td><td>Systemic Sclerosis</td></tr> <tr><td>4</td><td>Vasculitis</td></tr> <tr><td>5</td><td>other</td></tr> </table>                                                                                                                                                                                                                                                                                                                                                                                                                                                                                                                                                                                                                                                                                                                                                                                                                                    | 1 | LES                        | 2  | Rheumatoid Arthritis                | 3                      | Systemic Sclerosis | 4 | Vasculitis             | 5              | other |                        |                 |   |                        |               |   |                        |                       |   |                        |                                       |   |                        |       |   |                        |          |   |                        |           |    |                         |               |    |                         |           |    |                         |       |    |                         |         |
| 1  | LES                                                                          |                                                                                                      |                                                                                                                                                                                                                                                                                                                                                                                                                                                                                                                                                                                                                                                                                                                                                                                                                                                                                                                                                                                                                                                                                     |   |                            |    |                                     |                        |                    |   |                        |                |       |                        |                 |   |                        |               |   |                        |                       |   |                        |                                       |   |                        |       |   |                        |          |   |                        |           |    |                         |               |    |                         |           |    |                         |       |    |                         |         |
| 2  | Rheumatoid Arthritis                                                         |                                                                                                      |                                                                                                                                                                                                                                                                                                                                                                                                                                                                                                                                                                                                                                                                                                                                                                                                                                                                                                                                                                                                                                                                                     |   |                            |    |                                     |                        |                    |   |                        |                |       |                        |                 |   |                        |               |   |                        |                       |   |                        |                                       |   |                        |       |   |                        |          |   |                        |           |    |                         |               |    |                         |           |    |                         |       |    |                         |         |
| 3  | Systemic Sclerosis                                                           |                                                                                                      |                                                                                                                                                                                                                                                                                                                                                                                                                                                                                                                                                                                                                                                                                                                                                                                                                                                                                                                                                                                                                                                                                     |   |                            |    |                                     |                        |                    |   |                        |                |       |                        |                 |   |                        |               |   |                        |                       |   |                        |                                       |   |                        |       |   |                        |          |   |                        |           |    |                         |               |    |                         |           |    |                         |       |    |                         |         |
| 4  | Vasculitis                                                                   |                                                                                                      |                                                                                                                                                                                                                                                                                                                                                                                                                                                                                                                                                                                                                                                                                                                                                                                                                                                                                                                                                                                                                                                                                     |   |                            |    |                                     |                        |                    |   |                        |                |       |                        |                 |   |                        |               |   |                        |                       |   |                        |                                       |   |                        |       |   |                        |          |   |                        |           |    |                         |               |    |                         |           |    |                         |       |    |                         |         |
| 5  | other                                                                        |                                                                                                      |                                                                                                                                                                                                                                                                                                                                                                                                                                                                                                                                                                                                                                                                                                                                                                                                                                                                                                                                                                                                                                                                                     |   |                            |    |                                     |                        |                    |   |                        |                |       |                        |                 |   |                        |               |   |                        |                       |   |                        |                                       |   |                        |       |   |                        |          |   |                        |           |    |                         |               |    |                         |           |    |                         |       |    |                         |         |
| 57 | substance_abuse                                                              | Substance abuse                                                                                      | checkbox<br><table border="1"> <tr><td>1</td><td>substance_abuse__1</td><td>No</td></tr> <tr><td>2</td><td>substance_abuse__2</td><td>Alcohol</td></tr> <tr><td>3</td><td>substance_abuse__3</td><td>Illicit Drugs</td></tr> <tr><td>4</td><td>substance_abuse__4</td><td>Smoking history</td></tr> </table>                                                                                                                                                                                                                                                                                                                                                                                                                                                                                                                                                                                                                                                                                                                                                                        | 1 | substance_abuse__1         | No | 2                                   | substance_abuse__2     | Alcohol            | 3 | substance_abuse__3     | Illicit Drugs  | 4     | substance_abuse__4     | Smoking history |   |                        |               |   |                        |                       |   |                        |                                       |   |                        |       |   |                        |          |   |                        |           |    |                         |               |    |                         |           |    |                         |       |    |                         |         |
| 1  | substance_abuse__1                                                           | No                                                                                                   |                                                                                                                                                                                                                                                                                                                                                                                                                                                                                                                                                                                                                                                                                                                                                                                                                                                                                                                                                                                                                                                                                     |   |                            |    |                                     |                        |                    |   |                        |                |       |                        |                 |   |                        |               |   |                        |                       |   |                        |                                       |   |                        |       |   |                        |          |   |                        |           |    |                         |               |    |                         |           |    |                         |       |    |                         |         |
| 2  | substance_abuse__2                                                           | Alcohol                                                                                              |                                                                                                                                                                                                                                                                                                                                                                                                                                                                                                                                                                                                                                                                                                                                                                                                                                                                                                                                                                                                                                                                                     |   |                            |    |                                     |                        |                    |   |                        |                |       |                        |                 |   |                        |               |   |                        |                       |   |                        |                                       |   |                        |       |   |                        |          |   |                        |           |    |                         |               |    |                         |           |    |                         |       |    |                         |         |
| 3  | substance_abuse__3                                                           | Illicit Drugs                                                                                        |                                                                                                                                                                                                                                                                                                                                                                                                                                                                                                                                                                                                                                                                                                                                                                                                                                                                                                                                                                                                                                                                                     |   |                            |    |                                     |                        |                    |   |                        |                |       |                        |                 |   |                        |               |   |                        |                       |   |                        |                                       |   |                        |       |   |                        |          |   |                        |           |    |                         |               |    |                         |           |    |                         |       |    |                         |         |
| 4  | substance_abuse__4                                                           | Smoking history                                                                                      |                                                                                                                                                                                                                                                                                                                                                                                                                                                                                                                                                                                                                                                                                                                                                                                                                                                                                                                                                                                                                                                                                     |   |                            |    |                                     |                        |                    |   |                        |                |       |                        |                 |   |                        |               |   |                        |                       |   |                        |                                       |   |                        |       |   |                        |          |   |                        |           |    |                         |               |    |                         |           |    |                         |       |    |                         |         |
| 58 | alcohol_consumption<br>Show the field ONLY if:<br>[substance_abuse(2)] = '1' | Alcohol consumption<br><i>Please choose severe if patient has history of withdrawal or cirrhosis</i> | dropdown<br><table border="1"> <tr><td>1</td><td>Mild</td></tr> <tr><td>2</td><td>Severe</td></tr> </table>                                                                                                                                                                                                                                                                                                                                                                                                                                                                                                                                                                                                                                                                                                                                                                                                                                                                                                                                                                         | 1 | Mild                       | 2  | Severe                              |                        |                    |   |                        |                |       |                        |                 |   |                        |               |   |                        |                       |   |                        |                                       |   |                        |       |   |                        |          |   |                        |           |    |                         |               |    |                         |           |    |                         |       |    |                         |         |
| 1  | Mild                                                                         |                                                                                                      |                                                                                                                                                                                                                                                                                                                                                                                                                                                                                                                                                                                                                                                                                                                                                                                                                                                                                                                                                                                                                                                                                     |   |                            |    |                                     |                        |                    |   |                        |                |       |                        |                 |   |                        |               |   |                        |                       |   |                        |                                       |   |                        |       |   |                        |          |   |                        |           |    |                         |               |    |                         |           |    |                         |       |    |                         |         |
| 2  | Severe                                                                       |                                                                                                      |                                                                                                                                                                                                                                                                                                                                                                                                                                                                                                                                                                                                                                                                                                                                                                                                                                                                                                                                                                                                                                                                                     |   |                            |    |                                     |                        |                    |   |                        |                |       |                        |                 |   |                        |               |   |                        |                       |   |                        |                                       |   |                        |       |   |                        |          |   |                        |           |    |                         |               |    |                         |           |    |                         |       |    |                         |         |
| 59 | iv_drugs<br>Show the field ONLY if:<br>[substance_abuse(3)] = '1'            | Has the patient used IV drugs?                                                                       | dropdown<br><table border="1"> <tr><td>1</td><td>Yes</td></tr> <tr><td>0</td><td>No</td></tr> </table>                                                                                                                                                                                                                                                                                                                                                                                                                                                                                                                                                                                                                                                                                                                                                                                                                                                                                                                                                                              | 1 | Yes                        | 0  | No                                  |                        |                    |   |                        |                |       |                        |                 |   |                        |               |   |                        |                       |   |                        |                                       |   |                        |       |   |                        |          |   |                        |           |    |                         |               |    |                         |           |    |                         |       |    |                         |         |
| 1  | Yes                                                                          |                                                                                                      |                                                                                                                                                                                                                                                                                                                                                                                                                                                                                                                                                                                                                                                                                                                                                                                                                                                                                                                                                                                                                                                                                     |   |                            |    |                                     |                        |                    |   |                        |                |       |                        |                 |   |                        |               |   |                        |                       |   |                        |                                       |   |                        |       |   |                        |          |   |                        |           |    |                         |               |    |                         |           |    |                         |       |    |                         |         |
| 0  | No                                                                           |                                                                                                      |                                                                                                                                                                                                                                                                                                                                                                                                                                                                                                                                                                                                                                                                                                                                                                                                                                                                                                                                                                                                                                                                                     |   |                            |    |                                     |                        |                    |   |                        |                |       |                        |                 |   |                        |               |   |                        |                       |   |                        |                                       |   |                        |       |   |                        |          |   |                        |           |    |                         |               |    |                         |           |    |                         |       |    |                         |         |
| 60 | smoking<br>Show the field ONLY if:<br>[substance_abuse(4)] = '1'             | Smoking History                                                                                      | dropdown<br><table border="1"> <tr><td>1</td><td>Quit &gt; 1 year ago</td></tr> <tr><td>2</td><td>Quit &lt; 1 year ago or current smoker</td></tr> </table>                                                                                                                                                                                                                                                                                                                                                                                                                                                                                                                                                                                                                                                                                                                                                                                                                                                                                                                         | 1 | Quit > 1 year ago          | 2  | Quit < 1 year ago or current smoker |                        |                    |   |                        |                |       |                        |                 |   |                        |               |   |                        |                       |   |                        |                                       |   |                        |       |   |                        |          |   |                        |           |    |                         |               |    |                         |           |    |                         |       |    |                         |         |
| 1  | Quit > 1 year ago                                                            |                                                                                                      |                                                                                                                                                                                                                                                                                                                                                                                                                                                                                                                                                                                                                                                                                                                                                                                                                                                                                                                                                                                                                                                                                     |   |                            |    |                                     |                        |                    |   |                        |                |       |                        |                 |   |                        |               |   |                        |                       |   |                        |                                       |   |                        |       |   |                        |          |   |                        |           |    |                         |               |    |                         |           |    |                         |       |    |                         |         |
| 2  | Quit < 1 year ago or current smoker                                          |                                                                                                      |                                                                                                                                                                                                                                                                                                                                                                                                                                                                                                                                                                                                                                                                                                                                                                                                                                                                                                                                                                                                                                                                                     |   |                            |    |                                     |                        |                    |   |                        |                |       |                        |                 |   |                        |               |   |                        |                       |   |                        |                                       |   |                        |       |   |                        |          |   |                        |           |    |                         |               |    |                         |           |    |                         |       |    |                         |         |
| 61 | pack_year<br>Show the field ONLY if:<br>[substance_abuse(4)] = '1'           | Smoking Pack Year                                                                                    | text                                                                                                                                                                                                                                                                                                                                                                                                                                                                                                                                                                                                                                                                                                                                                                                                                                                                                                                                                                                                                                                                                |   |                            |    |                                     |                        |                    |   |                        |                |       |                        |                 |   |                        |               |   |                        |                       |   |                        |                                       |   |                        |       |   |                        |          |   |                        |           |    |                         |               |    |                         |           |    |                         |       |    |                         |         |
| 62 | living                                                                       | Living facilities                                                                                    | dropdown<br><table border="1"> <tr><td>1</td><td>Assisted living facilities</td></tr> <tr><td>2</td><td>Home</td></tr> </table>                                                                                                                                                                                                                                                                                                                                                                                                                                                                                                                                                                                                                                                                                                                                                                                                                                                                                                                                                     | 1 | Assisted living facilities | 2  | Home                                |                        |                    |   |                        |                |       |                        |                 |   |                        |               |   |                        |                       |   |                        |                                       |   |                        |       |   |                        |          |   |                        |           |    |                         |               |    |                         |           |    |                         |       |    |                         |         |
| 1  | Assisted living facilities                                                   |                                                                                                      |                                                                                                                                                                                                                                                                                                                                                                                                                                                                                                                                                                                                                                                                                                                                                                                                                                                                                                                                                                                                                                                                                     |   |                            |    |                                     |                        |                    |   |                        |                |       |                        |                 |   |                        |               |   |                        |                       |   |                        |                                       |   |                        |       |   |                        |          |   |                        |           |    |                         |               |    |                         |           |    |                         |       |    |                         |         |
| 2  | Home                                                                         |                                                                                                      |                                                                                                                                                                                                                                                                                                                                                                                                                                                                                                                                                                                                                                                                                                                                                                                                                                                                                                                                                                                                                                                                                     |   |                            |    |                                     |                        |                    |   |                        |                |       |                        |                 |   |                        |               |   |                        |                       |   |                        |                                       |   |                        |       |   |                        |          |   |                        |           |    |                         |               |    |                         |           |    |                         |       |    |                         |         |
| 63 | chronic_medications                                                          | Chronic medications                                                                                  | checkbox<br><table border="1"> <tr><td>0</td><td>chronic_medications__0</td><td>No</td></tr> <tr><td>1</td><td>chronic_medications__1</td><td>ASA</td></tr> <tr><td>2</td><td>chronic_medications__2</td><td>Anticoagulants</td></tr> <tr><td>3</td><td>chronic_medications__3</td><td>Statins</td></tr> <tr><td>4</td><td>chronic_medications__4</td><td>ACE-inhibitor</td></tr> <tr><td>5</td><td>chronic_medications__5</td><td>Prednisone (&gt;5mg/day)</td></tr> <tr><td>6</td><td>chronic_medications__6</td><td>Angiotensin II Receptor Blocker (ARB)</td></tr> <tr><td>7</td><td>chronic_medications__7</td><td>NSAID</td></tr> <tr><td>8</td><td>chronic_medications__8</td><td>Diuretic</td></tr> <tr><td>9</td><td>chronic_medications__9</td><td>Metformin</td></tr> <tr><td>10</td><td>chronic_medications__10</td><td>Carbamazepine</td></tr> <tr><td>11</td><td>chronic_medications__11</td><td>B blocker</td></tr> <tr><td>00</td><td>chronic_medications__00</td><td>Other</td></tr> <tr><td>88</td><td>chronic_medications__88</td><td>Unknown</td></tr> </table> | 0 | chronic_medications__0     | No | 1                                   | chronic_medications__1 | ASA                | 2 | chronic_medications__2 | Anticoagulants | 3     | chronic_medications__3 | Statins         | 4 | chronic_medications__4 | ACE-inhibitor | 5 | chronic_medications__5 | Prednisone (>5mg/day) | 6 | chronic_medications__6 | Angiotensin II Receptor Blocker (ARB) | 7 | chronic_medications__7 | NSAID | 8 | chronic_medications__8 | Diuretic | 9 | chronic_medications__9 | Metformin | 10 | chronic_medications__10 | Carbamazepine | 11 | chronic_medications__11 | B blocker | 00 | chronic_medications__00 | Other | 88 | chronic_medications__88 | Unknown |
| 0  | chronic_medications__0                                                       | No                                                                                                   |                                                                                                                                                                                                                                                                                                                                                                                                                                                                                                                                                                                                                                                                                                                                                                                                                                                                                                                                                                                                                                                                                     |   |                            |    |                                     |                        |                    |   |                        |                |       |                        |                 |   |                        |               |   |                        |                       |   |                        |                                       |   |                        |       |   |                        |          |   |                        |           |    |                         |               |    |                         |           |    |                         |       |    |                         |         |
| 1  | chronic_medications__1                                                       | ASA                                                                                                  |                                                                                                                                                                                                                                                                                                                                                                                                                                                                                                                                                                                                                                                                                                                                                                                                                                                                                                                                                                                                                                                                                     |   |                            |    |                                     |                        |                    |   |                        |                |       |                        |                 |   |                        |               |   |                        |                       |   |                        |                                       |   |                        |       |   |                        |          |   |                        |           |    |                         |               |    |                         |           |    |                         |       |    |                         |         |
| 2  | chronic_medications__2                                                       | Anticoagulants                                                                                       |                                                                                                                                                                                                                                                                                                                                                                                                                                                                                                                                                                                                                                                                                                                                                                                                                                                                                                                                                                                                                                                                                     |   |                            |    |                                     |                        |                    |   |                        |                |       |                        |                 |   |                        |               |   |                        |                       |   |                        |                                       |   |                        |       |   |                        |          |   |                        |           |    |                         |               |    |                         |           |    |                         |       |    |                         |         |
| 3  | chronic_medications__3                                                       | Statins                                                                                              |                                                                                                                                                                                                                                                                                                                                                                                                                                                                                                                                                                                                                                                                                                                                                                                                                                                                                                                                                                                                                                                                                     |   |                            |    |                                     |                        |                    |   |                        |                |       |                        |                 |   |                        |               |   |                        |                       |   |                        |                                       |   |                        |       |   |                        |          |   |                        |           |    |                         |               |    |                         |           |    |                         |       |    |                         |         |
| 4  | chronic_medications__4                                                       | ACE-inhibitor                                                                                        |                                                                                                                                                                                                                                                                                                                                                                                                                                                                                                                                                                                                                                                                                                                                                                                                                                                                                                                                                                                                                                                                                     |   |                            |    |                                     |                        |                    |   |                        |                |       |                        |                 |   |                        |               |   |                        |                       |   |                        |                                       |   |                        |       |   |                        |          |   |                        |           |    |                         |               |    |                         |           |    |                         |       |    |                         |         |
| 5  | chronic_medications__5                                                       | Prednisone (>5mg/day)                                                                                |                                                                                                                                                                                                                                                                                                                                                                                                                                                                                                                                                                                                                                                                                                                                                                                                                                                                                                                                                                                                                                                                                     |   |                            |    |                                     |                        |                    |   |                        |                |       |                        |                 |   |                        |               |   |                        |                       |   |                        |                                       |   |                        |       |   |                        |          |   |                        |           |    |                         |               |    |                         |           |    |                         |       |    |                         |         |
| 6  | chronic_medications__6                                                       | Angiotensin II Receptor Blocker (ARB)                                                                |                                                                                                                                                                                                                                                                                                                                                                                                                                                                                                                                                                                                                                                                                                                                                                                                                                                                                                                                                                                                                                                                                     |   |                            |    |                                     |                        |                    |   |                        |                |       |                        |                 |   |                        |               |   |                        |                       |   |                        |                                       |   |                        |       |   |                        |          |   |                        |           |    |                         |               |    |                         |           |    |                         |       |    |                         |         |
| 7  | chronic_medications__7                                                       | NSAID                                                                                                |                                                                                                                                                                                                                                                                                                                                                                                                                                                                                                                                                                                                                                                                                                                                                                                                                                                                                                                                                                                                                                                                                     |   |                            |    |                                     |                        |                    |   |                        |                |       |                        |                 |   |                        |               |   |                        |                       |   |                        |                                       |   |                        |       |   |                        |          |   |                        |           |    |                         |               |    |                         |           |    |                         |       |    |                         |         |
| 8  | chronic_medications__8                                                       | Diuretic                                                                                             |                                                                                                                                                                                                                                                                                                                                                                                                                                                                                                                                                                                                                                                                                                                                                                                                                                                                                                                                                                                                                                                                                     |   |                            |    |                                     |                        |                    |   |                        |                |       |                        |                 |   |                        |               |   |                        |                       |   |                        |                                       |   |                        |       |   |                        |          |   |                        |           |    |                         |               |    |                         |           |    |                         |       |    |                         |         |
| 9  | chronic_medications__9                                                       | Metformin                                                                                            |                                                                                                                                                                                                                                                                                                                                                                                                                                                                                                                                                                                                                                                                                                                                                                                                                                                                                                                                                                                                                                                                                     |   |                            |    |                                     |                        |                    |   |                        |                |       |                        |                 |   |                        |               |   |                        |                       |   |                        |                                       |   |                        |       |   |                        |          |   |                        |           |    |                         |               |    |                         |           |    |                         |       |    |                         |         |
| 10 | chronic_medications__10                                                      | Carbamazepine                                                                                        |                                                                                                                                                                                                                                                                                                                                                                                                                                                                                                                                                                                                                                                                                                                                                                                                                                                                                                                                                                                                                                                                                     |   |                            |    |                                     |                        |                    |   |                        |                |       |                        |                 |   |                        |               |   |                        |                       |   |                        |                                       |   |                        |       |   |                        |          |   |                        |           |    |                         |               |    |                         |           |    |                         |       |    |                         |         |
| 11 | chronic_medications__11                                                      | B blocker                                                                                            |                                                                                                                                                                                                                                                                                                                                                                                                                                                                                                                                                                                                                                                                                                                                                                                                                                                                                                                                                                                                                                                                                     |   |                            |    |                                     |                        |                    |   |                        |                |       |                        |                 |   |                        |               |   |                        |                       |   |                        |                                       |   |                        |       |   |                        |          |   |                        |           |    |                         |               |    |                         |           |    |                         |       |    |                         |         |
| 00 | chronic_medications__00                                                      | Other                                                                                                |                                                                                                                                                                                                                                                                                                                                                                                                                                                                                                                                                                                                                                                                                                                                                                                                                                                                                                                                                                                                                                                                                     |   |                            |    |                                     |                        |                    |   |                        |                |       |                        |                 |   |                        |               |   |                        |                       |   |                        |                                       |   |                        |       |   |                        |          |   |                        |           |    |                         |               |    |                         |           |    |                         |       |    |                         |         |
| 88 | chronic_medications__88                                                      | Unknown                                                                                              |                                                                                                                                                                                                                                                                                                                                                                                                                                                                                                                                                                                                                                                                                                                                                                                                                                                                                                                                                                                                                                                                                     |   |                            |    |                                     |                        |                    |   |                        |                |       |                        |                 |   |                        |               |   |                        |                       |   |                        |                                       |   |                        |       |   |                        |          |   |                        |           |    |                         |               |    |                         |           |    |                         |       |    |                         |         |
| 64 | hospitalization                                                              | Previous hospitalization in the past 30 days?                                                        | dropdown<br><table border="1"> <tr><td>1</td><td>Yes</td></tr> <tr><td>0</td><td>No</td></tr> </table>                                                                                                                                                                                                                                                                                                                                                                                                                                                                                                                                                                                                                                                                                                                                                                                                                                                                                                                                                                              | 1 | Yes                        | 0  | No                                  |                        |                    |   |                        |                |       |                        |                 |   |                        |               |   |                        |                       |   |                        |                                       |   |                        |       |   |                        |          |   |                        |           |    |                         |               |    |                         |           |    |                         |       |    |                         |         |
| 1  | Yes                                                                          |                                                                                                      |                                                                                                                                                                                                                                                                                                                                                                                                                                                                                                                                                                                                                                                                                                                                                                                                                                                                                                                                                                                                                                                                                     |   |                            |    |                                     |                        |                    |   |                        |                |       |                        |                 |   |                        |               |   |                        |                       |   |                        |                                       |   |                        |       |   |                        |          |   |                        |           |    |                         |               |    |                         |           |    |                         |       |    |                         |         |
| 0  | No                                                                           |                                                                                                      |                                                                                                                                                                                                                                                                                                                                                                                                                                                                                                                                                                                                                                                                                                                                                                                                                                                                                                                                                                                                                                                                                     |   |                            |    |                                     |                        |                    |   |                        |                |       |                        |                 |   |                        |               |   |                        |                       |   |                        |                                       |   |                        |       |   |                        |          |   |                        |           |    |                         |               |    |                         |           |    |                         |       |    |                         |         |
| 65 | antibiotics                                                                  | Antibiotics use in the past 30 days?                                                                 | dropdown<br><table border="1"> <tr><td>1</td><td>Yes</td></tr> <tr><td>0</td><td>No</td></tr> </table>                                                                                                                                                                                                                                                                                                                                                                                                                                                                                                                                                                                                                                                                                                                                                                                                                                                                                                                                                                              | 1 | Yes                        | 0  | No                                  |                        |                    |   |                        |                |       |                        |                 |   |                        |               |   |                        |                       |   |                        |                                       |   |                        |       |   |                        |          |   |                        |           |    |                         |               |    |                         |           |    |                         |       |    |                         |         |
| 1  | Yes                                                                          |                                                                                                      |                                                                                                                                                                                                                                                                                                                                                                                                                                                                                                                                                                                                                                                                                                                                                                                                                                                                                                                                                                                                                                                                                     |   |                            |    |                                     |                        |                    |   |                        |                |       |                        |                 |   |                        |               |   |                        |                       |   |                        |                                       |   |                        |       |   |                        |          |   |                        |           |    |                         |               |    |                         |           |    |                         |       |    |                         |         |
| 0  | No                                                                           |                                                                                                      |                                                                                                                                                                                                                                                                                                                                                                                                                                                                                                                                                                                                                                                                                                                                                                                                                                                                                                                                                                                                                                                                                     |   |                            |    |                                     |                        |                    |   |                        |                |       |                        |                 |   |                        |               |   |                        |                       |   |                        |                                       |   |                        |       |   |                        |          |   |                        |           |    |                         |               |    |                         |           |    |                         |       |    |                         |         |
| 66 | medical_history_complete                                                     | Section Header: <i>Form Status</i><br>Complete?                                                      | dropdown<br><table border="1"> <tr><td>0</td><td>Incomplete</td></tr> <tr><td>1</td><td>Unverified</td></tr> <tr><td>2</td><td>Complete</td></tr> </table>                                                                                                                                                                                                                                                                                                                                                                                                                                                                                                                                                                                                                                                                                                                                                                                                                                                                                                                          | 0 | Incomplete                 | 1  | Unverified                          | 2                      | Complete           |   |                        |                |       |                        |                 |   |                        |               |   |                        |                       |   |                        |                                       |   |                        |       |   |                        |          |   |                        |           |    |                         |               |    |                         |           |    |                         |       |    |                         |         |
| 0  | Incomplete                                                                   |                                                                                                      |                                                                                                                                                                                                                                                                                                                                                                                                                                                                                                                                                                                                                                                                                                                                                                                                                                                                                                                                                                                                                                                                                     |   |                            |    |                                     |                        |                    |   |                        |                |       |                        |                 |   |                        |               |   |                        |                       |   |                        |                                       |   |                        |       |   |                        |          |   |                        |           |    |                         |               |    |                         |           |    |                         |       |    |                         |         |
| 1  | Unverified                                                                   |                                                                                                      |                                                                                                                                                                                                                                                                                                                                                                                                                                                                                                                                                                                                                                                                                                                                                                                                                                                                                                                                                                                                                                                                                     |   |                            |    |                                     |                        |                    |   |                        |                |       |                        |                 |   |                        |               |   |                        |                       |   |                        |                                       |   |                        |       |   |                        |          |   |                        |           |    |                         |               |    |                         |           |    |                         |       |    |                         |         |
| 2  | Complete                                                                     |                                                                                                      |                                                                                                                                                                                                                                                                                                                                                                                                                                                                                                                                                                                                                                                                                                                                                                                                                                                                                                                                                                                                                                                                                     |   |                            |    |                                     |                        |                    |   |                        |                |       |                        |                 |   |                        |               |   |                        |                       |   |                        |                                       |   |                        |       |   |                        |          |   |                        |           |    |                         |               |    |                         |           |    |                         |       |    |                         |         |

Instrument: **ED/floor preceding 8 hrs interventions (imported)** (edfloor\_preceding\_8\_hrs\_interventions\_imported)

|     |                       |                                                                                                                         |      |
|-----|-----------------------|-------------------------------------------------------------------------------------------------------------------------|------|
| 67  | temperature_high      | Section Header: <i>Vital Signs</i><br>ED Temperature Celsius (HIGH)<br><i>Please record the highest in the ED/floor</i> | text |
| 68  | temperature_lowed     | ED Temperature celsius (LOW)<br><i>Please record the lowest in the ED/Floor</i>                                         | text |
| 69  | hr_ed                 | ED Heart Rate (HIGH)<br><i>Please record the highest in the ED/floor</i>                                                | text |
| 70  | hr_lowed              | ED Heart Rate (LOW)<br><i>Please record the lowest in the ED/Floor</i>                                                  | text |
| 71  | rr_ed                 | ED Respiratory Rate (HIGH)<br><i>Please record the highest in the ED/floor</i>                                          | text |
| 72  | rr_lowed              | ED Respiratory Rate (LOW)<br><i>Please record the lowest in the ED/Floor</i>                                            | text |
| 73  | temperature_high_hosp | Section Header: <i>Vital Signs</i><br>Temperature Celsius (HIGH)<br><i>Please record the highest in the ED/floor</i>    | text |
| 74  | temperature_low_hosp  | Temperature celsius (LOW)<br><i>Please record the lowest in the ED/Floor</i>                                            | text |
| 75  | hr_hosp               | Heart Rate (HIGH)<br><i>Please record the highest in the ED/floor</i>                                                   | text |
| 76  | hr_low_hosp           | Heart Rate (LOW)<br><i>Please record the lowest in the ED/Floor</i>                                                     | text |
| 77  | rr_hosp               | Respiratory Rate (HIGH)<br><i>Please record the highest in the ED/floor</i>                                             | text |
| 78  | rr_low_hosp           | Respiratory Rate (LOW)<br><i>Please record the lowest in the ED/Floor</i>                                               | text |
| 79  | sbp_ed_high           | ED Systolic Blood Pressure (HIGH)<br><i>Please record the highest in the ED/floor</i>                                   | text |
| 80  | sbp_low_ed            | ED Systolic Blood Pressure (LOW)<br><i>Please record the lowest in the ED/Floor</i>                                     | text |
| 81  | dbp_high_ed           | ED Diastolic Blood Pressure (HIGH)<br><i>Please record the highest in the ED/floor</i>                                  | text |
| 82  | dbp_low_ed2           | ED Diastolic Blood Pressure (LOW)<br><i>Please record the lowest in the ED/Floor</i>                                    | text |
| 83  | mbp_ed_high           | ED Mean Blood Pressure (HIGH)                                                                                           | text |
| 84  | mbp_low_ed            | ED Mean Blood Pressure (LOW)                                                                                            | text |
| 85  | sbp_inv_ed_high       | ED Arterial Systolic Blood Pressure (HIGH)<br><i>Please record the highest in the ED/floor</i>                          | text |
| 86  | sbp_inv_low_ed        | ED Arterial Systolic Blood Pressure (LOW)<br><i>Please record the lowest in the ED/Floor</i>                            | text |
| 87  | dbp_inv_high_ed       | ED Arterial Diastolic Blood Pressure (HIGH)<br><i>Please record the highest in the ED/floor</i>                         | text |
| 88  | dbp_inv_low_ed2       | ED Arterial Diastolic Blood Pressure (LOW)<br><i>Please record the lowest in the ED/Floor</i>                           | text |
| 89  | mbp_inv_ed_high       | ED Arterial Mean Blood Pressure (HIGH)                                                                                  | text |
| 90  | mbp_inv_low_ed        | ED Arterial Mean Blood Pressure (LOW)                                                                                   | text |
| 91  | sbp_high_hosp         | Systolic Blood Pressure (HIGH)<br><i>Please record the highest in the ED/floor</i>                                      | text |
| 92  | sbp_low_hosp          | Systolic Blood Pressure (LOW)<br><i>Please record the lowest in the ED/Floor</i>                                        | text |
| 93  | dbp_high_hosp         | Diastolic Blood Pressure (HIGH)<br><i>Please record the highest in the ED/floor</i>                                     | text |
| 94  | dbp_low_hosp          | Diastolic Blood Pressure (LOW)<br><i>Please record the lowest in the ED/Floor</i>                                       | text |
| 95  | mbp_high_hosp         | Mean Blood Pressure (HIGH)                                                                                              | text |
| 96  | mbp_low_hosp          | Mean Blood Pressure (LOW)                                                                                               | text |
| 97  | sbp_inv_high_hosp     | Arterial Systolic Blood Pressure (HIGH)<br><i>Please record the highest in the ED/floor</i>                             | text |
| 98  | sbp_inv_low_hosp      | Arterial Systolic Blood Pressure (LOW)<br><i>Please record the lowest in the ED/Floor</i>                               | text |
| 99  | dbp_inv_high_hosp     | Arterial Diastolic Blood Pressure (HIGH)<br><i>Please record the highest in the ED/floor</i>                            | text |
| 100 | dbp_inv_low_hosp      | Arterial Diastolic Blood Pressure (LOW)<br><i>Please record the lowest in the ED/Floor</i>                              | text |
| 101 | mbp_inv_high_hosp     | Arterial Mean Blood Pressure (HIGH)                                                                                     | text |
| 102 | mbp_inv_low_hosp      | Arterial Mean Blood Pressure (LOW)                                                                                      | text |

|                                                                                                      |                                                         |                                                                                                                                         |                                                        |
|------------------------------------------------------------------------------------------------------|---------------------------------------------------------|-----------------------------------------------------------------------------------------------------------------------------------------|--------------------------------------------------------|
| 103                                                                                                  | ab_ed                                                   | Section Header: <i>Interventions</i><br>Was the patient started on antibiotics?<br><i>Please record minutes before admission to ICU</i> | dropdown<br>1 Yes<br>0 No                              |
| 104                                                                                                  | date_ab                                                 | Date of antibiotics administration                                                                                                      | text (date_mdy)                                        |
| 105                                                                                                  | time_ab                                                 | Time of antibiotics administration                                                                                                      | text (time)                                            |
| 106                                                                                                  | total_volume_of_fluid                                   | Total Volume of Fluid (mL)                                                                                                              | text                                                   |
| 107                                                                                                  | vaso_ed                                                 | Was the patient started on vasopressors in ED/Floor                                                                                     | yesno<br>1 Yes<br>0 No                                 |
| 108                                                                                                  | ventilation                                             | Was the patient started in mechanical ventilation in the ED/Floor?                                                                      | yesno<br>1 Yes<br>0 No                                 |
| 109                                                                                                  | niv                                                     | Was the patient started in non invasive ventilation in the ED/Floor?                                                                    | yesno<br>1 Yes<br>0 No                                 |
| 110                                                                                                  | lct_previous8h                                          | Lactate<br><i>Please record highest value</i>                                                                                           | text                                                   |
| 111                                                                                                  | ams_previos_8hr                                         | Altered mental status                                                                                                                   | yesno<br>1 Yes<br>0 No                                 |
| 112                                                                                                  | edfloor_preceding_8_hrs_interventions_imported_complete | Section Header: <i>Form Status</i><br>Complete?                                                                                         | dropdown<br>0 Incomplete<br>1 Unverified<br>2 Complete |
| Instrument: <b>Edfloor Preceding 8 Hrs Interventions T</b> (edfloor_preceding_8_hrs_interventions_t) |                                                         |                                                                                                                                         |                                                        |
| 113                                                                                                  | time_icu_t                                              | Date of ICU admission                                                                                                                   | text (date_dmy)                                        |
| 114                                                                                                  | total_volume_of_fluid_t                                 | Total Volume of Fluid (mL)                                                                                                              | text                                                   |
| 115                                                                                                  | vaso_ed_t                                               | Was the patient started on vasopressors in ED/Floor?                                                                                    | yesno<br>1 Yes<br>0 No                                 |
| 116                                                                                                  | ventilation_t                                           | Was the patient started on mechanical ventilation in the ED/Floor?                                                                      | yesno<br>1 Yes<br>0 No                                 |
| 117                                                                                                  | niv_t                                                   | Was the patient started on non invasive ventilation in the ED/Floor?                                                                    | yesno<br>1 Yes<br>0 No                                 |
| 118                                                                                                  | ams_previos_8hr_t                                       | Did the patient have an altered mental status?                                                                                          | yesno<br>1 Yes<br>0 No                                 |
| 119                                                                                                  | edfloor_preceding_8_hrs_interventions_t_complete        | Section Header: <i>Form Status</i><br>Complete?                                                                                         | dropdown<br>0 Incomplete<br>1 Unverified<br>2 Complete |
| Instrument: <b>qSOFA</b> (qsofa)                                                                     |                                                         |                                                                                                                                         |                                                        |
| 120                                                                                                  | ams_first_availble                                      | Section Header: <i>First available qSOFA score</i><br>Altered Mental Status<br><i>First available data</i>                              | dropdown<br>0 No<br>1 Yes                              |
| 121                                                                                                  | rr_first_available                                      | Respiratory rate of 22 or greater                                                                                                       | dropdown<br>0 No<br>1 Yes                              |
| 122                                                                                                  | systolic_pressure_first_available                       | Systolic blood pressure equal or less to 100                                                                                            | dropdown<br>0 No<br>1 Yes                              |



|                                                                                |                            |                                                                                                                    |                                                                                                                                                                 |   |            |   |            |   |          |   |   |
|--------------------------------------------------------------------------------|----------------------------|--------------------------------------------------------------------------------------------------------------------|-----------------------------------------------------------------------------------------------------------------------------------------------------------------|---|------------|---|------------|---|----------|---|---|
| 123                                                                            | qsofa_fisrt_available      | qSOFA score (first available)                                                                                      | dropdown<br><table border="1"> <tr><td>0</td><td>0</td></tr> <tr><td>1</td><td>1</td></tr> <tr><td>2</td><td>2</td></tr> <tr><td>3</td><td>3</td></tr> </table> | 0 | 0          | 1 | 1          | 2 | 2        | 3 | 3 |
| 0                                                                              | 0                          |                                                                                                                    |                                                                                                                                                                 |   |            |   |            |   |          |   |   |
| 1                                                                              | 1                          |                                                                                                                    |                                                                                                                                                                 |   |            |   |            |   |          |   |   |
| 2                                                                              | 2                          |                                                                                                                    |                                                                                                                                                                 |   |            |   |            |   |          |   |   |
| 3                                                                              | 3                          |                                                                                                                    |                                                                                                                                                                 |   |            |   |            |   |          |   |   |
| 124                                                                            | ams_worst24hr              | Section Header: <i>Worst in 24 hr before ICU admission</i><br>Altered Mental Status<br><i>First available data</i> | dropdown<br><table border="1"> <tr><td>0</td><td>No</td></tr> <tr><td>1</td><td>Yes</td></tr> </table>                                                          | 0 | No         | 1 | Yes        |   |          |   |   |
| 0                                                                              | No                         |                                                                                                                    |                                                                                                                                                                 |   |            |   |            |   |          |   |   |
| 1                                                                              | Yes                        |                                                                                                                    |                                                                                                                                                                 |   |            |   |            |   |          |   |   |
| 125                                                                            | rr_worst_24hr              | Respiratory rate of 22 or greater                                                                                  | dropdown<br><table border="1"> <tr><td>0</td><td>No</td></tr> <tr><td>1</td><td>Yes</td></tr> </table>                                                          | 0 | No         | 1 | Yes        |   |          |   |   |
| 0                                                                              | No                         |                                                                                                                    |                                                                                                                                                                 |   |            |   |            |   |          |   |   |
| 1                                                                              | Yes                        |                                                                                                                    |                                                                                                                                                                 |   |            |   |            |   |          |   |   |
| 126                                                                            | systolic_pressure_24hr     | Systolic blood pressure equal or less to 100                                                                       | dropdown<br><table border="1"> <tr><td>0</td><td>No</td></tr> <tr><td>1</td><td>Yes</td></tr> </table>                                                          | 0 | No         | 1 | Yes        |   |          |   |   |
| 0                                                                              | No                         |                                                                                                                    |                                                                                                                                                                 |   |            |   |            |   |          |   |   |
| 1                                                                              | Yes                        |                                                                                                                    |                                                                                                                                                                 |   |            |   |            |   |          |   |   |
| 127                                                                            | qsofa_fisrt_available2_52d | qSOFA score (worst in 24 hr)                                                                                       | dropdown<br><table border="1"> <tr><td>0</td><td>0</td></tr> <tr><td>1</td><td>1</td></tr> <tr><td>2</td><td>2</td></tr> <tr><td>3</td><td>3</td></tr> </table> | 0 | 0          | 1 | 1          | 2 | 2        | 3 | 3 |
| 0                                                                              | 0                          |                                                                                                                    |                                                                                                                                                                 |   |            |   |            |   |          |   |   |
| 1                                                                              | 1                          |                                                                                                                    |                                                                                                                                                                 |   |            |   |            |   |          |   |   |
| 2                                                                              | 2                          |                                                                                                                    |                                                                                                                                                                 |   |            |   |            |   |          |   |   |
| 3                                                                              | 3                          |                                                                                                                    |                                                                                                                                                                 |   |            |   |            |   |          |   |   |
| 128                                                                            | ams_worst24hr2_100         | Section Header: <i>8 hr before ICU admission</i><br>Altered Mental Status<br><i>First available data</i>           | dropdown<br><table border="1"> <tr><td>0</td><td>No</td></tr> <tr><td>1</td><td>Yes</td></tr> </table>                                                          | 0 | No         | 1 | Yes        |   |          |   |   |
| 0                                                                              | No                         |                                                                                                                    |                                                                                                                                                                 |   |            |   |            |   |          |   |   |
| 1                                                                              | Yes                        |                                                                                                                    |                                                                                                                                                                 |   |            |   |            |   |          |   |   |
| 129                                                                            | rr_worst_24hr2_8b9         | Respiratory rate of 22 or greater                                                                                  | dropdown<br><table border="1"> <tr><td>0</td><td>No</td></tr> <tr><td>1</td><td>Yes</td></tr> </table>                                                          | 0 | No         | 1 | Yes        |   |          |   |   |
| 0                                                                              | No                         |                                                                                                                    |                                                                                                                                                                 |   |            |   |            |   |          |   |   |
| 1                                                                              | Yes                        |                                                                                                                    |                                                                                                                                                                 |   |            |   |            |   |          |   |   |
| 130                                                                            | systolic_pressure_24h2_4b3 | Systolic blood pressure equal or less to 100                                                                       | dropdown<br><table border="1"> <tr><td>0</td><td>No</td></tr> <tr><td>1</td><td>Yes</td></tr> </table>                                                          | 0 | No         | 1 | Yes        |   |          |   |   |
| 0                                                                              | No                         |                                                                                                                    |                                                                                                                                                                 |   |            |   |            |   |          |   |   |
| 1                                                                              | Yes                        |                                                                                                                    |                                                                                                                                                                 |   |            |   |            |   |          |   |   |
| 131                                                                            | qsofa_fisrt_available2_dab | qSOFA score (worst in 8 hr before ICU admission)                                                                   | dropdown<br><table border="1"> <tr><td>0</td><td>0</td></tr> <tr><td>1</td><td>1</td></tr> <tr><td>2</td><td>2</td></tr> <tr><td>3</td><td>3</td></tr> </table> | 0 | 0          | 1 | 1          | 2 | 2        | 3 | 3 |
| 0                                                                              | 0                          |                                                                                                                    |                                                                                                                                                                 |   |            |   |            |   |          |   |   |
| 1                                                                              | 1                          |                                                                                                                    |                                                                                                                                                                 |   |            |   |            |   |          |   |   |
| 2                                                                              | 2                          |                                                                                                                    |                                                                                                                                                                 |   |            |   |            |   |          |   |   |
| 3                                                                              | 3                          |                                                                                                                    |                                                                                                                                                                 |   |            |   |            |   |          |   |   |
| 132                                                                            | qsofa_complete             | Section Header: <i>Form Status</i><br>Complete?                                                                    | dropdown<br><table border="1"> <tr><td>0</td><td>Incomplete</td></tr> <tr><td>1</td><td>Unverified</td></tr> <tr><td>2</td><td>Complete</td></tr> </table>      | 0 | Incomplete | 1 | Unverified | 2 | Complete |   |   |
| 0                                                                              | Incomplete                 |                                                                                                                    |                                                                                                                                                                 |   |            |   |            |   |          |   |   |
| 1                                                                              | Unverified                 |                                                                                                                    |                                                                                                                                                                 |   |            |   |            |   |          |   |   |
| 2                                                                              | Complete                   |                                                                                                                    |                                                                                                                                                                 |   |            |   |            |   |          |   |   |
| Instrument: <b>Initial evaluation (imported)</b> (initial_evaluation_imported) |                            |                                                                                                                    |                                                                                                                                                                 |   |            |   |            |   |          |   |   |
| 133                                                                            | date_icu                   | Date correspondent to first day in the ICU                                                                         | text                                                                                                                                                            |   |            |   |            |   |          |   |   |
| 134                                                                            | begin_datetime_of_evaluati | Begin datetime of evaluation window                                                                                | text                                                                                                                                                            |   |            |   |            |   |          |   |   |
| 135                                                                            | end_datetime_of_evaluation | End datetime of evaluation window                                                                                  | text                                                                                                                                                            |   |            |   |            |   |          |   |   |
| 136                                                                            | weight                     | Body Weight (Kg)                                                                                                   | text                                                                                                                                                            |   |            |   |            |   |          |   |   |
| 137                                                                            | height                     | Height (cm)                                                                                                        | text                                                                                                                                                            |   |            |   |            |   |          |   |   |
| 138                                                                            | bmi                        | BMI                                                                                                                | calc<br>Calculation: $([weight]/([height]*[height]))*10000$                                                                                                     |   |            |   |            |   |          |   |   |
| 139                                                                            | bmi_2                      | BMI (Manual)                                                                                                       | text                                                                                                                                                            |   |            |   |            |   |          |   |   |
| 140                                                                            | admission_source           | ICU admission source                                                                                               | text                                                                                                                                                            |   |            |   |            |   |          |   |   |
| 141                                                                            | temperature                | Section Header: <i>Vital Signs</i><br>Temperature (C) High<br><i>Please record the highest in the last 24 hr</i>   | text                                                                                                                                                            |   |            |   |            |   |          |   |   |
| 142                                                                            | temperature2_794           | Temperature (C) Low<br><i>Please record the lowest in the last 24 hr</i>                                           | text                                                                                                                                                            |   |            |   |            |   |          |   |   |
| 143                                                                            | heart_rate                 | Heart Rate High<br><i>Please record the highest in the last 24 hr</i>                                              | text                                                                                                                                                            |   |            |   |            |   |          |   |   |
| 144                                                                            | heart_rate2_8f5            | Heart Rate Low<br><i>Please record the lowest in the last 24 hr</i>                                                | text                                                                                                                                                            |   |            |   |            |   |          |   |   |

|     |                             |                                                                                                                       |                                                                                                         |
|-----|-----------------------------|-----------------------------------------------------------------------------------------------------------------------|---------------------------------------------------------------------------------------------------------|
| 145 | respiratory_rate            | Respiratory Rate High<br><i>Please record the highest in the last 24 hr, before intubation in case of intubated</i>   | text                                                                                                    |
| 146 | respiratory_rate2_b9c       | Respiratory Rate Low<br><i>Please record the lowest in the last 24 hr, before the intubation in case of intubated</i> | text                                                                                                    |
| 147 | systolic                    | Non-invasive Systolic Blood Pressure High<br><i>Please record the highest in the last 24 hr</i>                       | text                                                                                                    |
| 148 | systolic2_2e1               | Non-invasive Systolic Blood Pressure Low<br><i>Please record the lowest in the last 24 hr</i>                         | text                                                                                                    |
| 149 | diastolic_pressure          | Non-invasive Diastolic Blood Pressure High<br><i>Please record the highest in the last 24 hr</i>                      | text                                                                                                    |
| 150 | diastolic_pressure2_37e     | Non-invasive Diastolic Blood Pressure Low<br><i>Please record the lowest in the last 24 hr</i>                        | text                                                                                                    |
| 151 | mean_blood_pressure         | Non-invasive Mean Blood Pressure High                                                                                 | calc<br>Calculation: $(([\text{diastolic\_pressure}] * 2) / 3) + ([\text{systolic}] / 3)$               |
| 152 | mean_blood_pressure_high_m  | Non-invasive Mean Blood Pressure High                                                                                 | text<br>Field Annotation: RDR                                                                           |
| 153 | mean_blood_pressure2_e6d    | Non-invasive Mean Blood Pressure low                                                                                  | calc<br>Calculation: $(([\text{diastolic\_pressure2\_37e}] * 2) / 3) + ([\text{systolic2\_2e1}] / 3)$   |
| 154 | mean_blood_pressure_low_ma  | Non-invasive Mean Blood Pressure Low                                                                                  | text<br>Field Annotation: From RDR                                                                      |
| 155 | systolici                   | Invasive Systolic Blood Pressure High<br><i>Please record the highest in the last 24 hr</i>                           | text                                                                                                    |
| 156 | systolic2_2e1i              | Invasive Systolic Blood Pressure Low<br><i>Please record the lowest in the last 24 hr</i>                             | text                                                                                                    |
| 157 | diastolic_pressureei        | Invasive Diastolic Blood Pressure High<br><i>Please record the highest in the last 24 hr</i>                          | text                                                                                                    |
| 158 | diastolic_pressure2_37ei    | Invasive Diastolic Blood Pressure Low<br><i>Please record the lowest in the last 24 hr</i>                            | text                                                                                                    |
| 159 | mean_blood_pressureei       | Invasive Mean Blood Pressure High                                                                                     | calc<br>Calculation: $(([\text{diastolic\_pressureei}] * 2) / 3) + ([\text{systolici}] / 3)$            |
| 160 | mean_blood_pressure_high_mi | Invasive Mean Blood Pressure High                                                                                     | text                                                                                                    |
| 161 | mean_blood_pressure2_e6di   | Invasive Mean Blood Pressure low                                                                                      | calc<br>Calculation: $(([\text{diastolic\_pressure2\_37ei}] * 2) / 3) + ([\text{systolic2\_2e1i}] / 3)$ |
| 162 | mean_blood_pressure_low_mai | Invasive Mean Blood Pressure Low                                                                                      | text                                                                                                    |
| 163 | hct                         | Section Header: <i>Laboratory Results</i><br>HCT                                                                      | text                                                                                                    |
| 164 | hemoglobin                  | Hemoglobin                                                                                                            | text                                                                                                    |
| 165 | wbc                         | WBC                                                                                                                   | text                                                                                                    |
| 166 | neutrophils                 | Neutrophils %                                                                                                         | text                                                                                                    |
| 167 | bands1                      | Bands %                                                                                                               | text                                                                                                    |
| 168 | platelets                   | Platelets /mm <sup>3</sup>                                                                                            | text                                                                                                    |
| 169 | sodium                      | Sodium meq/L                                                                                                          | text                                                                                                    |
| 170 | potassium                   | Potassium meq/L                                                                                                       | text                                                                                                    |
| 171 | bun                         | BUN mg/dL                                                                                                             | text                                                                                                    |
| 172 | creatinine                  | Creatinine mg/dL                                                                                                      | text                                                                                                    |
| 173 | glucose                     | Glucose mg/dL                                                                                                         | text                                                                                                    |
| 174 | albumin                     | Albumin g/dL                                                                                                          | text                                                                                                    |
| 175 | bilirubin                   | Bilirubin mg/dL                                                                                                       | text                                                                                                    |
| 176 | inr_1                       | INR<br><i>If not please write N/A</i>                                                                                 | text                                                                                                    |
| 177 | ptt_1                       | PTT<br><i>If not please write N/A</i>                                                                                 | text                                                                                                    |
| 178 | troponin_1                  | Troponin<br><i>If not please write N/A</i>                                                                            | text                                                                                                    |
| 179 | procalcitonin               | Procalcitonin                                                                                                         | text                                                                                                    |
| 180 | bicarbonate                 | Bicarbonate meq/L                                                                                                     | text                                                                                                    |
| 181 | lactate                     | Lactate meq/L                                                                                                         | text                                                                                                    |
| 182 | gfr                         | Section Header: <i>Kidney function</i><br>GFR                                                                         | text                                                                                                    |
| 183 | bun_creat                   | BUN/creatinine ratio                                                                                                  | text                                                                                                    |
| 184 | protein_urine               | Urine Protein                                                                                                         | text                                                                                                    |

|     |                       |                                                                                                                           |                                                                                                              |   |     |   |    |
|-----|-----------------------|---------------------------------------------------------------------------------------------------------------------------|--------------------------------------------------------------------------------------------------------------|---|-----|---|----|
| 185 | creat_urine           | Urine creatinine                                                                                                          | text                                                                                                         |   |     |   |    |
| 186 | urine_osmolality      | Osmolality urine                                                                                                          | text                                                                                                         |   |     |   |    |
| 187 | urine_na              | Urine Na                                                                                                                  | text                                                                                                         |   |     |   |    |
| 188 | urine_k               | Urine K                                                                                                                   | text                                                                                                         |   |     |   |    |
| 189 | intubation_abg        | Was the patient intubated at the time of the ABG?                                                                         | text                                                                                                         |   |     |   |    |
| 190 | po2                   | PO2                                                                                                                       | text                                                                                                         |   |     |   |    |
| 191 | arterialsO2           | Arterial SO2                                                                                                              | text                                                                                                         |   |     |   |    |
| 192 | co2                   | PCO2                                                                                                                      | text                                                                                                         |   |     |   |    |
| 193 | ph                    | PH                                                                                                                        | text                                                                                                         |   |     |   |    |
| 194 | central_venous_gas    | Central venous gas                                                                                                        | dropdown<br><table border="1"> <tr> <td>1</td> <td>Yes</td> </tr> <tr> <td>0</td> <td>No</td> </tr> </table> | 1 | Yes | 0 | No |
| 1   | Yes                   |                                                                                                                           |                                                                                                              |   |     |   |    |
| 0   | No                    |                                                                                                                           |                                                                                                              |   |     |   |    |
| 195 | cvpco2                | Central Venous PCO2                                                                                                       | text                                                                                                         |   |     |   |    |
| 196 | cvpo2                 | Central Venous PO2                                                                                                        | text                                                                                                         |   |     |   |    |
| 197 | cvso2                 | Central Venous SO2                                                                                                        | text                                                                                                         |   |     |   |    |
| 198 | mixed_venous_gas      | Mixed Venous Gas                                                                                                          | dropdown<br><table border="1"> <tr> <td>1</td> <td>Yes</td> </tr> <tr> <td>0</td> <td>No</td> </tr> </table> | 1 | Yes | 0 | No |
| 1   | Yes                   |                                                                                                                           |                                                                                                              |   |     |   |    |
| 0   | No                    |                                                                                                                           |                                                                                                              |   |     |   |    |
| 199 | mixed_venous_pco2     | Mixed Venous PCO2                                                                                                         | text                                                                                                         |   |     |   |    |
| 200 | mixed_venous_po2      | Mixed Venous PO2                                                                                                          | text                                                                                                         |   |     |   |    |
| 201 | mixed_venous_so2      | Mixed Venous SpO2                                                                                                         | text                                                                                                         |   |     |   |    |
| 202 | cvp                   | Section Header: <i>Other</i><br>CVP cm H2 High<br><i>Please record the highest in the last 24 hr</i>                      | text                                                                                                         |   |     |   |    |
| 203 | cvp2_c71              | CVP cm H2 Low<br><i>Please record the lowest in the last 24 hr</i>                                                        | text                                                                                                         |   |     |   |    |
| 204 | iv_fluid              | Total IV fluid given in the previous 24 hr                                                                                | text                                                                                                         |   |     |   |    |
| 205 | urinary_output        | Urinary Output ml/24hr<br><i>Please record the urinary output of the previous 24 hr.</i>                                  | text                                                                                                         |   |     |   |    |
| 206 | arf                   | Acute renal failure?                                                                                                      | dropdown<br><table border="1"> <tr> <td>1</td> <td>Yes</td> </tr> <tr> <td>0</td> <td>No</td> </tr> </table> | 1 | Yes | 0 | No |
| 1   | Yes                   |                                                                                                                           |                                                                                                              |   |     |   |    |
| 0   | No                    |                                                                                                                           |                                                                                                              |   |     |   |    |
| 207 | cardiac_output        | Cardiac Output                                                                                                            | text                                                                                                         |   |     |   |    |
| 208 | co_value_1            | Cardiac Output Value High                                                                                                 | text                                                                                                         |   |     |   |    |
| 209 | co_value_4            | Cardiac Output Value Low                                                                                                  | text                                                                                                         |   |     |   |    |
| 210 | stroke_volume         | Stroke Volume High                                                                                                        | text                                                                                                         |   |     |   |    |
| 211 | stroke_volume_2       | Stroke Volume Low                                                                                                         | text                                                                                                         |   |     |   |    |
| 212 | cardiac_index         | Cardiac index High                                                                                                        | text                                                                                                         |   |     |   |    |
| 213 | cardiac_index_2       | Cardiac index Low                                                                                                         | text                                                                                                         |   |     |   |    |
| 214 | dopa_dose             | Section Header: <i>Vasopressors</i><br>Dopamine Dose mcg/min (HIGH)<br><i>Please record the highest in the last 24 hr</i> | text                                                                                                         |   |     |   |    |
| 215 | dopa_dose2_675        | Dopamine Dose mcg/Kg/min (HIGH)                                                                                           | calc<br>Calculation: [dopa_dose]/[weight]                                                                    |   |     |   |    |
| 216 | dopa_doselow          | Dopamine Dose mcg/min (LOW)<br><i>Please record the lowest in the last 24 hr</i>                                          | text                                                                                                         |   |     |   |    |
| 217 | dopa_dose2_6752_630   | Dopamine Dose mcg/Kg/min (LOW)                                                                                            | calc<br>Calculation: [dopa_doselow]/[weight]                                                                 |   |     |   |    |
| 218 | dobuta_dose           | Dobutamine Dose mcg/Min (HIGH)<br><i>Please record the highest in the last 24 hr</i>                                      | text                                                                                                         |   |     |   |    |
| 219 | dobuta_dose2_ac0      | Dobutamine Dose mcg/Kg/Min (HIGH)                                                                                         | calc<br>Calculation: [dobuta_dose]/[weight]                                                                  |   |     |   |    |
| 220 | dobuta_doselow        | Dobutamine Dose mcg/Min (LOW)<br><i>Please record the lowest in the last 24 hr</i>                                        | text                                                                                                         |   |     |   |    |
| 221 | dobuta_dose2_ac02_eed | Dobutamine Dose mcg/Kg/Min (LOW)                                                                                          | calc<br>Calculation: [dobuta_doselow]/[weight]                                                               |   |     |   |    |
| 222 | norepi_dose           | Norepinephrine Dose mcg/Min (HIGH)<br><i>Please record the highest in the last 24 hr</i>                                  | text                                                                                                         |   |     |   |    |
| 223 | norepi_dose2_6fa      | Norepinephrine Dose mcg/Kg/Min (HIGH)                                                                                     | calc<br>Calculation: [norepi_dose]/[weight]                                                                  |   |     |   |    |

|     |                            |                                                                                             |                                                                                                              |   |     |   |    |
|-----|----------------------------|---------------------------------------------------------------------------------------------|--------------------------------------------------------------------------------------------------------------|---|-----|---|----|
| 224 | norepi_doselow             | Norepinephrine Dose mcg/Min (LOW)<br><i>Please record the lowest in the last 24 hr</i>      | text                                                                                                         |   |     |   |    |
| 225 | norepi_dose2_6fa2_93a      | Norepinephrine Dose mcg/Kg/Min (LOW)                                                        | calc<br>Calculation: [norepi_doselow]/[weight]                                                               |   |     |   |    |
| 226 | epi_dose                   | Epinephrine Dose mcg/Min (HIGH)<br><i>Please record the highest in the last 24 hr</i>       | text                                                                                                         |   |     |   |    |
| 227 | epi_dose2_ca0              | Epinephrine Dose mcg/Kg/Min (HIGH)                                                          | calc<br>Calculation: [epi_dose]/[weight]                                                                     |   |     |   |    |
| 228 | epi_doselow                | Epinephrine Dose mcg/Min (LOW)<br><i>Please record the lowest in the last 24 hr</i>         | text                                                                                                         |   |     |   |    |
| 229 | epi_dose2_ca02_fe4         | Epinephrine Dose mcg/Kg/Min (LOW)                                                           | calc<br>Calculation: [epi_doselow]/[weight]                                                                  |   |     |   |    |
| 230 | phenylephrine_dose         | Phenylephrine Dose mcg/Min (HIGH)<br><i>Please record the highest in the last 24 hr</i>     | text                                                                                                         |   |     |   |    |
| 231 | phenylephrine_dose2_cd9    | Phenylephrine Dose mcg/Kg/Min (HIGH)                                                        | calc<br>Calculation: [phenylephrine_dose]/[weight]                                                           |   |     |   |    |
| 232 | phenylephrine_doselow      | Phenylephrine Dose mcg/Min (LOW)<br><i>Please record the lowest in the last 24 hr</i>       | text                                                                                                         |   |     |   |    |
| 233 | phenylephrine_dose2_c2_4e5 | Phenylephrine Dose mcg/Kg/Min (LOW)                                                         | calc<br>Calculation: [phenylephrine_doselow]/[weight]                                                        |   |     |   |    |
| 234 | milrinone_dose             | Milrinone dose Mcg/min (HIGH)<br><i>Please record the highest in the last 24 hr</i>         | text                                                                                                         |   |     |   |    |
| 235 | milrinone_dose2_b0e        | Milrinone dose Mcg/Kg/min (HIGH)                                                            | calc<br>Calculation: [milrinone_dose]/[weight]                                                               |   |     |   |    |
| 236 | milrinone_doselow          | Milrinone dose Mcg/min (LOW)<br><i>Please record the lowest in the last 24 hr</i>           | text                                                                                                         |   |     |   |    |
| 237 | milrinone_dose2_b0e2_23d   | Milrinone dose Mcg/Kg/min (LOW)                                                             | calc<br>Calculation: [milrinone_doselow]/[weight]                                                            |   |     |   |    |
| 238 | vasopressin_dose           | Vasopressin dose U/min (HIGH)<br><i>Please record the highest in the last 24 hr</i>         | text                                                                                                         |   |     |   |    |
| 239 | vasopressin_dose2_b17      | Vasopressin dose U/min (LOW)<br><i>Please record the lowest in the last 24 hr</i>           | text                                                                                                         |   |     |   |    |
| 240 | propofol                   | Section Header: <i>Ventilation &amp; supplemental oxygen</i><br>Is the patient on propofol? | dropdown<br><table border="1"> <tr> <td>1</td> <td>Yes</td> </tr> <tr> <td>0</td> <td>No</td> </tr> </table> | 1 | Yes | 0 | No |
| 1   | Yes                        |                                                                                             |                                                                                                              |   |     |   |    |
| 0   | No                         |                                                                                             |                                                                                                              |   |     |   |    |
| 241 | invasive_ventilation       | Invasive ventilation?                                                                       | text                                                                                                         |   |     |   |    |
| 242 | intubation_date            | Intubation date                                                                             | text                                                                                                         |   |     |   |    |
| 243 | intubation_lowest_rr       | Was the patient intubated during the lowest RR?                                             | text                                                                                                         |   |     |   |    |
| 244 | ventilation_mode           | Ventilation mode                                                                            | text                                                                                                         |   |     |   |    |
| 245 | peep_pc_vc                 | PEEP                                                                                        | text                                                                                                         |   |     |   |    |
| 246 | pip_pc_vc                  | PIP (Inspiratory pressure)                                                                  | text                                                                                                         |   |     |   |    |
| 247 | itime_pc                   | Inspiratory Time (Itime) seconds                                                            | text                                                                                                         |   |     |   |    |
| 248 | tidal_vol_pc_vc_high       | Tidal Volume High<br><i>Please record the highest in the last 24 hr</i>                     | text                                                                                                         |   |     |   |    |
| 249 | tidal_vol_pc_vc_low        | Tidal Volume Low<br><i>Please record the lowest in the last 24 hr</i>                       | text                                                                                                         |   |     |   |    |
| 250 | minute_vent_pc_vc_high     | Minute Ventilation (HIGH)                                                                   | text                                                                                                         |   |     |   |    |
| 251 | minute_vent_pc_vc_low      | Minute Ventilation (LOW)                                                                    | text                                                                                                         |   |     |   |    |
| 252 | p_plateu                   | P Plateu                                                                                    | text                                                                                                         |   |     |   |    |
| 253 | compliance                 | Compliance                                                                                  | text                                                                                                         |   |     |   |    |
| 254 | flow_rate_pc_vc            | Flow rate                                                                                   | text                                                                                                         |   |     |   |    |
| 255 | peep_spontaneous           | PEEP                                                                                        | text                                                                                                         |   |     |   |    |
| 256 | pressure_above_peep_spont  | Pressure above PEEP                                                                         | text                                                                                                         |   |     |   |    |
| 257 | ex_tidal_vol_spont_high    | Exhaled tidal volume HIGH<br><i>Please record the highest in the last 24 hr</i>             | text                                                                                                         |   |     |   |    |
| 258 | ex_tidal_vol_spont_low     | Exhaled tidal volume Low<br><i>Please record the lowest in the last 24 hr</i>               | text                                                                                                         |   |     |   |    |
| 259 | resp_rate_pc_vc_spont_high | Respiratory Rate (HIGH)                                                                     | text                                                                                                         |   |     |   |    |
| 260 | resp_rate_pc_vc_spont_low  | Respiratory Rate (LOW)                                                                      | text                                                                                                         |   |     |   |    |
| 261 | minute_vent_spont_high     | Minute ventilation High<br><i>Please record the highest in the last 24 hr</i>               | text                                                                                                         |   |     |   |    |
| 262 | minute_vent_spont_low      | Minute ventilation Low<br><i>Please record the lowest in the last 24 hr</i>                 | text                                                                                                         |   |     |   |    |

|                                                                              |                                      |                                                                                                                       |                                                                       |
|------------------------------------------------------------------------------|--------------------------------------|-----------------------------------------------------------------------------------------------------------------------|-----------------------------------------------------------------------|
| 263                                                                          | inspiratory_pressure                 | Inspiratory pressure                                                                                                  | text                                                                  |
| 264                                                                          | supplemental                         | Supplemental O2 Device                                                                                                | text                                                                  |
| 265                                                                          | liters_oxygen                        | Liters/Min                                                                                                            | text                                                                  |
| 266                                                                          | set_fio2                             | Set Fio2                                                                                                              | text                                                                  |
| 267                                                                          | calculated_fio2                      | Calculated Fio2                                                                                                       | text                                                                  |
| 268                                                                          | fio2                                 | FiO2 %<br><i>Please record the FIO2 when the worst ABG was taken</i>                                                  | text                                                                  |
| 269                                                                          | pafi2                                | PaO2/FiO2                                                                                                             | text                                                                  |
| 270                                                                          | pafi1                                | PaO2/FiO2                                                                                                             | calc<br>Calculation: [po2]/([fio2]/100)                               |
| 271                                                                          | aado21                               | AaDO2                                                                                                                 | text                                                                  |
| 272                                                                          | glasgow                              | Glasgow                                                                                                               | text                                                                  |
| 273                                                                          | geye                                 | GCS Eye                                                                                                               | text                                                                  |
| 274                                                                          | gcs_verbal                           | GCS verbal                                                                                                            | text                                                                  |
| 275                                                                          | gcs_motor                            | GCS Motor                                                                                                             | text                                                                  |
| 276                                                                          | gcs_total                            | GCS Total                                                                                                             | text                                                                  |
| 277                                                                          | transfusion                          | Transfusion during the past 2 days?                                                                                   | text                                                                  |
| 278                                                                          | number_transfusion                   | Total number of transfusions given                                                                                    | text                                                                  |
| 279                                                                          | transfusion_2                        | Different type of transfusion?                                                                                        | text                                                                  |
| 280                                                                          | hrv_yes_no                           | Section Header: <i>Heart Rate Variability</i><br>HRV monitored?                                                       | yesno<br>1 Yes<br>0 No                                                |
| 281                                                                          | hrva_1_day                           | HRV-a                                                                                                                 | text                                                                  |
| 282                                                                          | hrvb_1_day                           | HRV-b                                                                                                                 | text                                                                  |
| 283                                                                          | hrvc_1_day                           | HRV-c                                                                                                                 | text                                                                  |
| 284                                                                          | hrvd_day_1                           | HRV-d                                                                                                                 | text                                                                  |
| 285                                                                          | initial_evaluation_imported_complete | Section Header: <i>Form Status</i><br>Complete?                                                                       | dropdown<br>0 Incomplete<br>1 Unverified<br>2 Complete                |
| Instrument: <b>Second Evaluation (imported)</b> (second_evaluation_imported) |                                      |                                                                                                                       |                                                                       |
| 286                                                                          | date_icu_2ev                         | Date correspondent to first day in the ICU                                                                            | text                                                                  |
| 287                                                                          | begin_datetime_of_evaluation_2ev     | Begin datetime of evaluation window                                                                                   | text                                                                  |
| 288                                                                          | end_datetime_of_evaluation_2ev       | End datetime of evaluation window                                                                                     | text                                                                  |
| 289                                                                          | weight_2ev                           | Body Weight (Kg)                                                                                                      | text                                                                  |
| 290                                                                          | height_2ev                           | Height (cm)                                                                                                           | text                                                                  |
| 291                                                                          | bmi_2ev                              | BMI                                                                                                                   | calc<br>Calculation: ([weight_2ev]/([height_2ev]*[height_2ev]))*10000 |
| 292                                                                          | bmi_2_2ev                            | BMI (Manual)                                                                                                          | text                                                                  |
| 293                                                                          | admission_source_2ev                 | ICU admission source                                                                                                  | text                                                                  |
| 294                                                                          | temperature_2ev                      | Section Header: <i>Vital Signs</i><br>Temperature (C) High<br><i>Please record the highest in the last 24 hr</i>      | text                                                                  |
| 295                                                                          | temperature2_794_2ev                 | Temperature (C) Low<br><i>Please record the lowest in the last 24 hr</i>                                              | text                                                                  |
| 296                                                                          | heart_rate_2ev                       | Heart Rate High<br><i>Please record the highest in the last 24 hr</i>                                                 | text                                                                  |
| 297                                                                          | heart_rate2_8f5_2ev                  | Heart Rate Low<br><i>Please record the lowest in the last 24 hr</i>                                                   | text                                                                  |
| 298                                                                          | respiratory_rate_2ev                 | Respiratory Rate High<br><i>Please record the highest in the last 24 hr, before intubation in case of intubated</i>   | text                                                                  |
| 299                                                                          | respiratory_rate2_b9c_2ev            | Respiratory Rate Low<br><i>Please record the lowest in the last 24 hr, before the intubation in case of intubated</i> | text                                                                  |
| 300                                                                          | systolic_2ev                         | Non-invasive Systolic Blood Pressure High<br><i>Please record the highest in the last 24 hr</i>                       | text                                                                  |
| 301                                                                          | systolic2_2e1_2ev                    | Non-invasive Systolic Blood Pressure Low<br><i>Please record the lowest in the last 24 hr</i>                         | text                                                                  |

|     |                                 |                                                                                                  |                                                                                                                   |
|-----|---------------------------------|--------------------------------------------------------------------------------------------------|-------------------------------------------------------------------------------------------------------------------|
| 302 | diastolic_pressure_2ev          | Non-invasive Diastolic Blood Pressure High<br><i>Please record the highest in the last 24 hr</i> | text                                                                                                              |
| 303 | diastolic_pressure2_37e_2ev     | Non-invasive Diastolic Blood Pressure<br><i>Please record the lowest in the last 24 hr</i>       | text                                                                                                              |
| 304 | mean_blood_pressure_2ev         | Non-invasive Mean Blood Pressure High                                                            | calc<br>Calculation: $(([\text{diastolic\_pressure\_2ev}] * 2) / 3) + ([\text{systolic\_2ev}] / 3)$               |
| 305 | mean_blood_pressure_high_m_2ev  | Non-invasive Non-invasive                                                                        | text                                                                                                              |
| 306 | mean_blood_pressure2_e6d_2ev    | Non-invasive Mean Blood Pressure low                                                             | calc<br>Calculation: $(([\text{diastolic\_pressure2\_37e\_2ev}] * 2) / 3) + ([\text{systolic2\_2e1\_2ev}] / 3)$   |
| 307 | mean_blood_pressure_low_ma_2ev  | Non-invasive Mean Blood Pressure Low (Manual)                                                    | text                                                                                                              |
| 308 | systolici_2ev                   | Invasive Systolic Blood Pressure High<br><i>Please record the highest in the last 24 hr</i>      | text                                                                                                              |
| 309 | systolic2_2e1i_2ev              | Invasive Systolic Blood Pressure Low<br><i>Please record the lowest in the last 24 hr</i>        | text                                                                                                              |
| 310 | diastolic_pressureei_2ev        | Invasive Diastolic Blood Pressure High<br><i>Please record the highest in the last 24 hr</i>     | text                                                                                                              |
| 311 | diastolic_pressure2_37ei_2ev    | Invasive Diastolic Blood Pressure<br><i>Please record the lowest in the last 24 hr</i>           | text                                                                                                              |
| 312 | mean_blood_pressureei_2ev       | Invasive Mean Blood Pressure High                                                                | calc<br>Calculation: $(([\text{diastolic\_pressureei\_2ev}] * 2) / 3) + ([\text{systolici\_2ev}] / 3)$            |
| 313 | mean_blood_pressure_high_mi_2ev | Invasive Mean Blood Pressure High (Manual)                                                       | text                                                                                                              |
| 314 | mean_blood_pressure2_e6di_2ev   | Invasive Mean Blood Pressure low                                                                 | calc<br>Calculation: $(([\text{diastolic\_pressure2\_37ei\_2ev}] * 2) / 3) + ([\text{systolic2\_2e1i\_2ev}] / 3)$ |
| 315 | mean_blood_pressure_low_mai_2ev | Invasive Mean Blood Pressure Low (Manual)                                                        | text                                                                                                              |
| 316 | hct_2ev                         | Section Header: <i>Laboratory Results</i><br>HCT                                                 | text                                                                                                              |
| 317 | hemoglobin_2ev                  | Hemoglobin                                                                                       | text                                                                                                              |
| 318 | wbc_2ev                         | WBC                                                                                              | text                                                                                                              |
| 319 | neutrophils_2ev                 | Neutrophils %                                                                                    | text                                                                                                              |
| 320 | bands1_2ev                      | Bands %                                                                                          | text                                                                                                              |
| 321 | platelets_2ev                   | Platelets /mm <sup>3</sup>                                                                       | text                                                                                                              |
| 322 | sodium_2ev                      | Sodium meq/L                                                                                     | text                                                                                                              |
| 323 | potassium_2ev                   | Potassium meq/L                                                                                  | text                                                                                                              |
| 324 | bun_2ev                         | BUN mg/dL                                                                                        | text                                                                                                              |
| 325 | creatinine_2ev                  | Creatinine mg/dL                                                                                 | text                                                                                                              |
| 326 | glucose_2ev                     | Glucose mg/dL                                                                                    | text                                                                                                              |
| 327 | albumin_2ev                     | Albumin g/dL                                                                                     | text                                                                                                              |
| 328 | bilirubin_2ev                   | Bilirubin mg/dL                                                                                  | text                                                                                                              |
| 329 | inr_1_2ev                       | INR<br><i>If not please write N/A</i>                                                            | text                                                                                                              |
| 330 | ptt_1_2ev                       | PTT<br><i>If not please write N/A</i>                                                            | text                                                                                                              |
| 331 | troponin_1_2ev                  | Troponin<br><i>If not please write N/A</i>                                                       | text                                                                                                              |
| 332 | procalcitonin_2ev               | Procalcitonin                                                                                    | text                                                                                                              |
| 333 | bicarbonate_2ev                 | Bicarbonate meq/L                                                                                | text                                                                                                              |
| 334 | lactate_2ev                     | Lactate meq/L                                                                                    | text                                                                                                              |
| 335 | gfr_2ev                         | Section Header: <i>Kidney function</i><br>GFR                                                    | text                                                                                                              |
| 336 | bun_creat_2ev                   | BUN/creatinine ratio                                                                             | text                                                                                                              |
| 337 | protein_urine_2ev               | Urine Protein                                                                                    | text                                                                                                              |
| 338 | creat_urine_2ev                 | Urine creatinine                                                                                 | text                                                                                                              |
| 339 | urine_osmolality_2ev            | Osmolality urine                                                                                 | text                                                                                                              |
| 340 | urine_na_2ev                    | Urine Na                                                                                         | text                                                                                                              |

|     |                                         |                                                                                                                           |                                                                                                                                                                                                                |   |                      |   |                                         |   |              |
|-----|-----------------------------------------|---------------------------------------------------------------------------------------------------------------------------|----------------------------------------------------------------------------------------------------------------------------------------------------------------------------------------------------------------|---|----------------------|---|-----------------------------------------|---|--------------|
| 341 | urine_k_2ev                             | Urine K                                                                                                                   | text                                                                                                                                                                                                           |   |                      |   |                                         |   |              |
| 342 | intubation_abg_2ev                      | Was the patient intubated at the time of the ABG?                                                                         | text                                                                                                                                                                                                           |   |                      |   |                                         |   |              |
| 343 | po2_2ev                                 | PO2                                                                                                                       | text                                                                                                                                                                                                           |   |                      |   |                                         |   |              |
| 344 | arterialsO2_2ev                         | Arterial SO2                                                                                                              | text                                                                                                                                                                                                           |   |                      |   |                                         |   |              |
| 345 | co2_2ev                                 | PCO2                                                                                                                      | text                                                                                                                                                                                                           |   |                      |   |                                         |   |              |
| 346 | ph_2ev                                  | PH                                                                                                                        | text                                                                                                                                                                                                           |   |                      |   |                                         |   |              |
| 347 | central_venous_gas_2ev                  | Central venous gas                                                                                                        | dropdown<br><table border="1"> <tr> <td>1</td> <td>Yes</td> </tr> <tr> <td>0</td> <td>No</td> </tr> </table>                                                                                                   | 1 | Yes                  | 0 | No                                      |   |              |
| 1   | Yes                                     |                                                                                                                           |                                                                                                                                                                                                                |   |                      |   |                                         |   |              |
| 0   | No                                      |                                                                                                                           |                                                                                                                                                                                                                |   |                      |   |                                         |   |              |
| 348 | cvpco2_2ev                              | Central Venous PCO2                                                                                                       | text                                                                                                                                                                                                           |   |                      |   |                                         |   |              |
| 349 | cvpo2_2ev                               | Central Venous PO2                                                                                                        | text                                                                                                                                                                                                           |   |                      |   |                                         |   |              |
| 350 | cvso2_2ev                               | Central Venous SO2                                                                                                        | text                                                                                                                                                                                                           |   |                      |   |                                         |   |              |
| 351 | mixed_venous_gas_2ev                    | Mixed Venous Gas                                                                                                          | dropdown<br><table border="1"> <tr> <td>1</td> <td>Yes</td> </tr> <tr> <td>0</td> <td>No</td> </tr> </table>                                                                                                   | 1 | Yes                  | 0 | No                                      |   |              |
| 1   | Yes                                     |                                                                                                                           |                                                                                                                                                                                                                |   |                      |   |                                         |   |              |
| 0   | No                                      |                                                                                                                           |                                                                                                                                                                                                                |   |                      |   |                                         |   |              |
| 352 | mixed_venous_pco2_2ev                   | Mixed Venous PCO2                                                                                                         | text                                                                                                                                                                                                           |   |                      |   |                                         |   |              |
| 353 | mixed_venous_po2_2ev                    | Mixed Venous PO2                                                                                                          | text                                                                                                                                                                                                           |   |                      |   |                                         |   |              |
| 354 | mixed_venous_so2_2ev                    | Mixed Venous SpO2                                                                                                         | text                                                                                                                                                                                                           |   |                      |   |                                         |   |              |
| 355 | cvp_2ev                                 | Section Header: <i>Other</i><br>CVP cm H2 High<br><i>Please record the highest in the last 24 hr</i>                      | text                                                                                                                                                                                                           |   |                      |   |                                         |   |              |
| 356 | cvp2_c71_2ev                            | CVP cm H2 Low<br><i>Please record the lowest in the last 24 hr</i>                                                        | text                                                                                                                                                                                                           |   |                      |   |                                         |   |              |
| 357 | iv_fluid_2ev                            | Total IV fluid given in the previous 24 hr                                                                                | text                                                                                                                                                                                                           |   |                      |   |                                         |   |              |
| 358 | urinary_output_2ev                      | Urinary Output ml/24hr<br><i>Please record the urinary output of the previous 24 hr.</i>                                  | text                                                                                                                                                                                                           |   |                      |   |                                         |   |              |
| 359 | arf_2ev                                 | Acute renal failure?                                                                                                      | dropdown<br><table border="1"> <tr> <td>1</td> <td>Yes</td> </tr> <tr> <td>0</td> <td>No</td> </tr> </table>                                                                                                   | 1 | Yes                  | 0 | No                                      |   |              |
| 1   | Yes                                     |                                                                                                                           |                                                                                                                                                                                                                |   |                      |   |                                         |   |              |
| 0   | No                                      |                                                                                                                           |                                                                                                                                                                                                                |   |                      |   |                                         |   |              |
| 360 | cardiac_output_2ev                      | Cardiac Output                                                                                                            | dropdown<br><table border="1"> <tr> <td>1</td> <td>Measured with NICCOM</td> </tr> <tr> <td>2</td> <td>Measured with Pulmonary artery catheter</td> </tr> <tr> <td>0</td> <td>Not measured</td> </tr> </table> | 1 | Measured with NICCOM | 2 | Measured with Pulmonary artery catheter | 0 | Not measured |
| 1   | Measured with NICCOM                    |                                                                                                                           |                                                                                                                                                                                                                |   |                      |   |                                         |   |              |
| 2   | Measured with Pulmonary artery catheter |                                                                                                                           |                                                                                                                                                                                                                |   |                      |   |                                         |   |              |
| 0   | Not measured                            |                                                                                                                           |                                                                                                                                                                                                                |   |                      |   |                                         |   |              |
| 361 | co_value_1_2ev                          | Cardiac Output Value High                                                                                                 | text                                                                                                                                                                                                           |   |                      |   |                                         |   |              |
| 362 | co_value_4_2ev                          | Cardiac Output Value Low                                                                                                  | text                                                                                                                                                                                                           |   |                      |   |                                         |   |              |
| 363 | stroke_volume_2ev                       | Stroke Volume High                                                                                                        | text                                                                                                                                                                                                           |   |                      |   |                                         |   |              |
| 364 | stroke_volume_2_2ev                     | Stroke Volume Low                                                                                                         | text                                                                                                                                                                                                           |   |                      |   |                                         |   |              |
| 365 | cardiac_index_2ev                       | Cardiac index High                                                                                                        | text                                                                                                                                                                                                           |   |                      |   |                                         |   |              |
| 366 | cardiac_index_2_2ev                     | Cardiac index Low                                                                                                         | text                                                                                                                                                                                                           |   |                      |   |                                         |   |              |
| 367 | dopa_dose_2ev                           | Section Header: <i>Vasopressors</i><br>Dopamine Dose mcg/min (HIGH)<br><i>Please record the highest in the last 24 hr</i> | text                                                                                                                                                                                                           |   |                      |   |                                         |   |              |
| 368 | dopa_dose2_675_2ev                      | Dopamine Dose mcg/Kg/min (HIGH)                                                                                           | calc<br>Calculation: [dopa_dose_2ev]/[weight_2ev]                                                                                                                                                              |   |                      |   |                                         |   |              |
| 369 | dopa_doselow_2ev                        | Dopamine Dose mcg/min (LOW)<br><i>Please record the lowest in the last 24 hr</i>                                          | text                                                                                                                                                                                                           |   |                      |   |                                         |   |              |
| 370 | dopa_dose2_6752_630_2ev                 | Dopamine Dose mcg/Kg/min (LOW)                                                                                            | calc<br>Calculation: [dopa_doselow_2ev]/[weight_2ev]                                                                                                                                                           |   |                      |   |                                         |   |              |
| 371 | dobuta_dose_2ev                         | Dobutamine Dose mcg/Min (HIGH)<br><i>Please record the highest in the last 24 hr</i>                                      | text                                                                                                                                                                                                           |   |                      |   |                                         |   |              |
| 372 | dobuta_dose2_ac0_2ev                    | Dobutamine Dose mcg/Kg/Min (HIGH)                                                                                         | calc<br>Calculation: [dobuta_dose_2ev]/[weight_2ev]                                                                                                                                                            |   |                      |   |                                         |   |              |
| 373 | dobuta_doselow_2ev                      | Dobutamine Dose mcg/Min (LOW)<br><i>Please record the lowest in the last 24 hr</i>                                        | text                                                                                                                                                                                                           |   |                      |   |                                         |   |              |
| 374 | dobuta_dose2_ac02_ecc2_2ev              | Dobutamine Dose mcg/Kg/Min (LOW)                                                                                          | calc<br>Calculation: [dobuta_doselow_2ev]/[weight_2ev]                                                                                                                                                         |   |                      |   |                                         |   |              |
| 375 | norepi_dose_2ev                         | Norepinephrine Dose mcg/Min (HIGH)<br><i>Please record the highest in the last 24 hr</i>                                  | text                                                                                                                                                                                                           |   |                      |   |                                         |   |              |
| 376 | norepi_dose2_6fa_2ev                    | Norepinephrine Dose mcg/Kg/Min (HIGH)                                                                                     | calc<br>Calculation: [norepi_dose_2ev]/[weight_2ev]                                                                                                                                                            |   |                      |   |                                         |   |              |

|     |                                |                                                                                             |                                                                                                              |   |     |   |    |
|-----|--------------------------------|---------------------------------------------------------------------------------------------|--------------------------------------------------------------------------------------------------------------|---|-----|---|----|
| 377 | norepi_doselow_2ev             | Norepinephrine Dose mcg/Min (LOW)<br><i>Please record the lowest in the last 24 hr</i>      | text                                                                                                         |   |     |   |    |
| 378 | norepi_dose2_6fa2_93a_2ev      | Norepinephrine Dose mcg/Kg/Min (LOW)                                                        | calc<br>Calculation: [norepi_doselow_2ev]/[weight_2ev]                                                       |   |     |   |    |
| 379 | epi_dose_2ev                   | Epinephrine Dose mcg/Min (HIGH)<br><i>Please record the highest in the last 24 hr</i>       | text                                                                                                         |   |     |   |    |
| 380 | epi_dose2_ca0_2ev              | Epinephrine Dose mcg/Kg/Min (HIGH)                                                          | calc<br>Calculation: [epi_dose_2ev]/[weight_2ev]                                                             |   |     |   |    |
| 381 | epi_doselow_2ev                | Epinephrine Dose mcg/Min (LOW)<br><i>Please record the lowest in the last 24 hr</i>         | text                                                                                                         |   |     |   |    |
| 382 | epi_dose2_ca02_fe4_2ev         | Epinephrine Dose mcg/Kg/Min (LOW)                                                           | calc<br>Calculation: [epi_doselow_2ev]/[weight_2ev]                                                          |   |     |   |    |
| 383 | phenylephrine_dose_2ev         | Phenylephrine Dose mcg/Min (HIGH)<br><i>Please record the highest in the last 24 hr</i>     | text                                                                                                         |   |     |   |    |
| 384 | phenylephrine_dose2_cd9_2ev    | Phenylephrine Dose mcg/Kg/Min (HIGH)                                                        | calc<br>Calculation: [phenylephrine_dose_2ev]/[weight_2ev]                                                   |   |     |   |    |
| 385 | phenylephrine_doselow_2ev      | Phenylephrine Dose mcg/Min (LOW)<br><i>Please record the lowest in the last 24 hr</i>       | text                                                                                                         |   |     |   |    |
| 386 | phenylephrine_dose2_c2_4e5_2ev | Phenylephrine Dose mcg/Kg/Min (LOW)                                                         | calc<br>Calculation: [phenylephrine_doselow_2ev]/[weight_2ev]                                                |   |     |   |    |
| 387 | milrinone_dose_2ev             | Milrinone dose Mcg/min (HIGH)<br><i>Please record the highest in the last 24 hr</i>         | text                                                                                                         |   |     |   |    |
| 388 | milrinone_dose2_b0e_2ev        | Milrinone dose Mcg/Kg/min (HIGH)                                                            | calc<br>Calculation: [milrinone_dose_2ev]/[weight_2ev]                                                       |   |     |   |    |
| 389 | milrinone_doselow_2ev          | Milrinone dose Mcg/min (LOW)<br><i>Please record the lowest in the last 24 hr</i>           | text                                                                                                         |   |     |   |    |
| 390 | milrinone_dose2_b0e2_23d_2ev   | Milrinone dose Mcg/Kg/min (LOW)                                                             | calc<br>Calculation: [milrinone_doselow_2ev]/[weight_2ev]                                                    |   |     |   |    |
| 391 | vasopressin_dose_2ev           | Vasopressin dose U/min (HIGH)<br><i>Please record the highest in the last 24 hr</i>         | text                                                                                                         |   |     |   |    |
| 392 | vasopressin_dose2_b17_2ev      | Vasopressin dose U/min (LOW)<br><i>Please record the lowest in the last 24 hr</i>           | text                                                                                                         |   |     |   |    |
| 393 | propofol_2ev                   | Section Header: <i>Ventilation &amp; supplemental oxygen</i><br>Is the patient on propofol? | dropdown<br><table border="1"> <tr> <td>1</td> <td>Yes</td> </tr> <tr> <td>0</td> <td>No</td> </tr> </table> | 1 | Yes | 0 | No |
| 1   | Yes                            |                                                                                             |                                                                                                              |   |     |   |    |
| 0   | No                             |                                                                                             |                                                                                                              |   |     |   |    |
| 394 | invasive_ventilation_2ev       | Invasive ventilation?                                                                       | text                                                                                                         |   |     |   |    |
| 395 | intubation_date_2ev            | Intubation date                                                                             | text                                                                                                         |   |     |   |    |
| 396 | intubation_lowest_rr_2ev       | Was the patient intubated during the lowest RR?                                             | text                                                                                                         |   |     |   |    |
| 397 | ventilation_mode_2ev           | Ventilation mode                                                                            | text                                                                                                         |   |     |   |    |
| 398 | peep_pc_vc_2ev                 | PEEP                                                                                        | text                                                                                                         |   |     |   |    |
| 399 | pip_pc_vc_2ev                  | PIP (Inspiratory pressure)                                                                  | text                                                                                                         |   |     |   |    |
| 400 | itime_pc_2ev                   | Inspiratory Time (Itime) seconds                                                            | text                                                                                                         |   |     |   |    |
| 401 | tidal_vol_pc_vc_high_2ev       | Tidal Volume High<br><i>Please record the highest in the last 24 hr</i>                     | text                                                                                                         |   |     |   |    |
| 402 | tidal_vol_pc_vc_low_2ev        | Tidal Volume Low<br><i>Please record the lowest in the last 24 hr</i>                       | text                                                                                                         |   |     |   |    |
| 403 | minute_vent_pc_vc_high_2ev     | Minute Ventilation (HIGH)                                                                   | text                                                                                                         |   |     |   |    |
| 404 | minute_vent_pc_vc_low_2ev      | Minute Ventilation (LOW)                                                                    | text                                                                                                         |   |     |   |    |
| 405 | p_plateu_2ev                   | P Plateu                                                                                    | text                                                                                                         |   |     |   |    |
| 406 | compliance_2ev                 | Compliance                                                                                  | text                                                                                                         |   |     |   |    |
| 407 | flow_rate_pc_vc_2ev            | Flow rate                                                                                   | text                                                                                                         |   |     |   |    |
| 408 | peep_spontaneous_2ev           | PEEP                                                                                        | text                                                                                                         |   |     |   |    |
| 409 | pressure_above_peep_spont_2ev  | Pressure above PEEP                                                                         | text                                                                                                         |   |     |   |    |
| 410 | ex_tidal_vol_spont_high_2ev    | Exhaled tidal volume HIGH<br><i>Please record the highest in the last 24 hr</i>             | text                                                                                                         |   |     |   |    |
| 411 | ex_tidal_vol_spont_low_2ev     | Exhaled tidal volume Low<br><i>Please record the lowest in the last 24 hr</i>               | text                                                                                                         |   |     |   |    |
| 412 | resp_rate_pc_vc_spont_high_2ev | Respiratory Rate (HIGH)                                                                     | text                                                                                                         |   |     |   |    |
| 413 | resp_rate_pc_vc_spont_low_2ev  | Respiratory Rate (LOW)                                                                      | text                                                                                                         |   |     |   |    |
| 414 | minute_vent_spont_high_2ev     | Minute ventilation High<br><i>Please record the highest in the last 24 hr</i>               | text                                                                                                         |   |     |   |    |
| 415 | minute_vent_spont_low_2ev      | Minute ventilation Low<br><i>Please record the lowest in the last 24 hr</i>                 | text                                                                                                         |   |     |   |    |



|                                                                            |                                     |                                                                                                                       |                                                                       |
|----------------------------------------------------------------------------|-------------------------------------|-----------------------------------------------------------------------------------------------------------------------|-----------------------------------------------------------------------|
| 416                                                                        | inspiratory_pressure_2ev            | Inspiratory pressure                                                                                                  | text                                                                  |
| 417                                                                        | supplemental_2ev                    | Supplemental O2 Device                                                                                                | text                                                                  |
| 418                                                                        | liters_oxygen_2ev                   | Liters/Min                                                                                                            | text                                                                  |
| 419                                                                        | set_fio2_2ev                        | Set Fio2                                                                                                              | text                                                                  |
| 420                                                                        | calculated_fio2_2ev                 | Calculated Fio2                                                                                                       | text                                                                  |
| 421                                                                        | fio2_2ev                            | FiO2 %<br><i>Please record the FIO2 when the worst ABG was taken</i>                                                  | text                                                                  |
| 422                                                                        | pafi2_2ev                           | PaO2/FiO2                                                                                                             | text                                                                  |
| 423                                                                        | pafi1_2ev                           | PaO2/FiO2                                                                                                             | calc<br>Calculation: [po2_2ev]/([fio2_2ev]/100)                       |
| 424                                                                        | aado21_2ev                          | AaDO2                                                                                                                 | text                                                                  |
| 425                                                                        | glasgow_2ev                         | Glasgow                                                                                                               | text                                                                  |
| 426                                                                        | geye_2ev                            | GCS Eye                                                                                                               | text                                                                  |
| 427                                                                        | gcs_verbal_2ev                      | GCS verbal                                                                                                            | text                                                                  |
| 428                                                                        | gcs_motor_2ev                       | GCS Motor                                                                                                             | text                                                                  |
| 429                                                                        | gcs_total_2ev                       | GCS Total                                                                                                             | text                                                                  |
| 430                                                                        | transfusion_2ev                     | Transfusion during the past 2 days?                                                                                   | text                                                                  |
| 431                                                                        | number_transfusion_2ev              | Total number of transfusions given                                                                                    | text                                                                  |
| 432                                                                        | transfusion_2_2ev                   | Different type of transfusion?                                                                                        | text                                                                  |
| 433                                                                        | hrv_yes_no_2ev                      | Section Header: <i>Heart Rate Variability</i><br>HRV monitored?                                                       | yesno<br>1 Yes<br>0 No                                                |
| 434                                                                        | hrva_1_day_2ev                      | HRV-a                                                                                                                 | text                                                                  |
| 435                                                                        | hrvb_1_day_2ev                      | HRV-b                                                                                                                 | text                                                                  |
| 436                                                                        | hrvc_1_day_2ev                      | HRV-c                                                                                                                 | text                                                                  |
| 437                                                                        | hrvd_day_1_2ev                      | HRV-d                                                                                                                 | text                                                                  |
| 438                                                                        | second_evaluation_imported_complete | Section Header: <i>Form Status</i><br>Complete?                                                                       | dropdown<br>0 Incomplete<br>1 Unverified<br>2 Complete                |
| Instrument: <b>Third Evaluation (imported)</b> (third_evaluation_imported) |                                     |                                                                                                                       |                                                                       |
| 439                                                                        | date_icu_3ev                        | Date correspondent to first day in the ICU                                                                            | text                                                                  |
| 440                                                                        | begin_datetime_of_evaluation_3ev    | Begin datetime of evaluation window                                                                                   | text                                                                  |
| 441                                                                        | end_datetime_of_evaluation_3ev      | End datetime of evaluation window                                                                                     | text                                                                  |
| 442                                                                        | weight_3ev                          | Body Weight (Kg)                                                                                                      | text                                                                  |
| 443                                                                        | height_3ev                          | Height (cm)                                                                                                           | text                                                                  |
| 444                                                                        | bmi_3ev                             | BMI                                                                                                                   | calc<br>Calculation: ([weight_3ev]/([height_3ev]*[height_3ev]))*10000 |
| 445                                                                        | bmi_2_3ev                           | BMI (Manual)                                                                                                          | text                                                                  |
| 446                                                                        | admission_source_3ev                | ICU admission source                                                                                                  | text                                                                  |
| 447                                                                        | temperature_3ev                     | Section Header: <i>Vital Signs</i><br>Temperature (C) High<br><i>Please record the highest in the last 24 hr</i>      | text                                                                  |
| 448                                                                        | temperature2_794_3ev                | Temperature (C) Low<br><i>Please record the lowest in the last 24 hr</i>                                              | text                                                                  |
| 449                                                                        | heart_rate_3ev                      | Heart Rate High<br><i>Please record the highest in the last 24 hr</i>                                                 | text                                                                  |
| 450                                                                        | heart_rate2_8f5_3ev                 | Heart Rate Low<br><i>Please record the lowest in the last 24 hr</i>                                                   | text                                                                  |
| 451                                                                        | respiratory_rate_3ev                | Respiratory Rate High<br><i>Please record the highest in the last 24 hr, before intubation in case of intubated</i>   | text                                                                  |
| 452                                                                        | respiratory_rate2_b9c_3ev           | Respiratory Rate Low<br><i>Please record the lowest in the last 24 hr, before the intubation in case of intubated</i> | text                                                                  |
| 453                                                                        | systolic_3ev                        | Non-invasive Systolic Blood Pressure High<br><i>Please record the highest in the last 24 hr</i>                       | text                                                                  |
| 454                                                                        | systolic2_2e1_3ev                   | Non-invasive Systolic Blood Pressure Low<br><i>Please record the lowest in the last 24 hr</i>                         | text                                                                  |

|     |                                 |                                                                                                  |                                                                                                                   |
|-----|---------------------------------|--------------------------------------------------------------------------------------------------|-------------------------------------------------------------------------------------------------------------------|
| 455 | diastolic_pressure_3ev          | Non-invasive Diastolic Blood Pressure High<br><i>Please record the highest in the last 24 hr</i> | text                                                                                                              |
| 456 | diastolic_pressure2_37e_3ev     | Non-invasive Diastolic Blood Pressure<br><i>Please record the lowest in the last 24 hr</i>       | text                                                                                                              |
| 457 | mean_blood_pressure_3ev         | Non-invasive Mean Blood Pressure High                                                            | calc<br>Calculation: $(([\text{diastolic\_pressure\_3ev}] * 2) / 3) + ([\text{systolic\_3ev}] / 3)$               |
| 458 | mean_blood_pressure_high_m_3ev  | Non-invasive Non-invasive                                                                        | text                                                                                                              |
| 459 | mean_blood_pressure2_e6d_3ev    | Non-invasive Mean Blood Pressure low                                                             | calc<br>Calculation: $(([\text{diastolic\_pressure2\_37e\_3ev}] * 2) / 3) + ([\text{systolic2\_2e1\_3ev}] / 3)$   |
| 460 | mean_blood_pressure_low_ma_3ev  | Non-invasive Mean Blood Pressure Low (Manual)                                                    | text                                                                                                              |
| 461 | systolici_3ev                   | Invasive Systolic Blood Pressure High<br><i>Please record the highest in the last 24 hr</i>      | text                                                                                                              |
| 462 | systolic2_2e1i_3ev              | Invasive Systolic Blood Pressure Low<br><i>Please record the lowest in the last 24 hr</i>        | text                                                                                                              |
| 463 | diastolic_pressureei_3ev        | Invasive Diastolic Blood Pressure High<br><i>Please record the highest in the last 24 hr</i>     | text                                                                                                              |
| 464 | diastolic_pressure2_37ei_3ev    | Invasive Diastolic Blood Pressure<br><i>Please record the lowest in the last 24 hr</i>           | text                                                                                                              |
| 465 | mean_blood_pressureei_3ev       | Invasive Mean Blood Pressure High                                                                | calc<br>Calculation: $(([\text{diastolic\_pressureei\_3ev}] * 2) / 3) + ([\text{systolici\_3ev}] / 3)$            |
| 466 | mean_blood_pressure_high_mi_3ev | Invasive Mean Blood Pressure High (Manual)                                                       | text                                                                                                              |
| 467 | mean_blood_pressure2_e6di_3ev   | Invasive Mean Blood Pressure low                                                                 | calc<br>Calculation: $(([\text{diastolic\_pressure2\_37ei\_3ev}] * 2) / 3) + ([\text{systolic2\_2e1i\_3ev}] / 3)$ |
| 468 | mean_blood_pressure_low_mai_3ev | Invasive Mean Blood Pressure Low (Manual)                                                        | text                                                                                                              |
| 469 | hct_3ev                         | Section Header: <i>Laboratory Results</i><br>HCT                                                 | text                                                                                                              |
| 470 | hemoglobin_3ev                  | Hemoglobin                                                                                       | text                                                                                                              |
| 471 | wbc_3ev                         | WBC                                                                                              | text                                                                                                              |
| 472 | neutrophils_3ev                 | Neutrophils %                                                                                    | text                                                                                                              |
| 473 | bands1_3ev                      | Bands %                                                                                          | text                                                                                                              |
| 474 | platelets_3ev                   | Platelets /mm <sup>3</sup>                                                                       | text                                                                                                              |
| 475 | sodium_3ev                      | Sodium meq/L                                                                                     | text                                                                                                              |
| 476 | potassium_3ev                   | Potassium meq/L                                                                                  | text                                                                                                              |
| 477 | bun_3ev                         | BUN mg/dL                                                                                        | text                                                                                                              |
| 478 | creatinine_3ev                  | Creatinine mg/dL                                                                                 | text                                                                                                              |
| 479 | glucose_3ev                     | Glucose mg/dL                                                                                    | text                                                                                                              |
| 480 | albumin_3ev                     | Albumin g/dL                                                                                     | text                                                                                                              |
| 481 | bilirubin_3ev                   | Bilirubin mg/dL                                                                                  | text                                                                                                              |
| 482 | inr_1_3ev                       | INR<br><i>If not please write N/A</i>                                                            | text                                                                                                              |
| 483 | ptt_1_3ev                       | PTT<br><i>If not please write N/A</i>                                                            | text                                                                                                              |
| 484 | troponin_1_3ev                  | Troponin<br><i>If not please write N/A</i>                                                       | text                                                                                                              |
| 485 | procalcitonin_3ev               | Procalcitonin                                                                                    | text                                                                                                              |
| 486 | bicarbonate_3ev                 | Bicarbonate meq/L                                                                                | text                                                                                                              |
| 487 | lactate_3ev                     | Lactate meq/L                                                                                    | text                                                                                                              |
| 488 | gfr_3ev                         | Section Header: <i>Kidney function</i><br>GFR                                                    | text                                                                                                              |
| 489 | bun_creat_3ev                   | BUN/creatinine ratio                                                                             | text                                                                                                              |
| 490 | protein_urine_3ev               | Urine Protein                                                                                    | text                                                                                                              |
| 491 | creat_urine_3ev                 | Urine creatinine                                                                                 | text                                                                                                              |
| 492 | urine_osmolality_3ev            | Osmolality urine                                                                                 | text                                                                                                              |
| 493 | urine_na_3ev                    | Urine Na                                                                                         | text                                                                                                              |

|     |                                         |                                                                                                                           |                                                                                                                                                                                                                |   |                      |   |                                         |   |              |
|-----|-----------------------------------------|---------------------------------------------------------------------------------------------------------------------------|----------------------------------------------------------------------------------------------------------------------------------------------------------------------------------------------------------------|---|----------------------|---|-----------------------------------------|---|--------------|
| 494 | urine_k_3ev                             | Urine K                                                                                                                   | text                                                                                                                                                                                                           |   |                      |   |                                         |   |              |
| 495 | intubation_abg_3ev                      | Was the patient intubated at the time of the ABG?                                                                         | text                                                                                                                                                                                                           |   |                      |   |                                         |   |              |
| 496 | po2_3ev                                 | PO2                                                                                                                       | text                                                                                                                                                                                                           |   |                      |   |                                         |   |              |
| 497 | arterialsO2_3ev                         | Arterial SO2                                                                                                              | text                                                                                                                                                                                                           |   |                      |   |                                         |   |              |
| 498 | co2_3ev                                 | PCO2                                                                                                                      | text                                                                                                                                                                                                           |   |                      |   |                                         |   |              |
| 499 | ph_3ev                                  | PH                                                                                                                        | text                                                                                                                                                                                                           |   |                      |   |                                         |   |              |
| 500 | central_venous_gas_3ev                  | Central venous gas                                                                                                        | dropdown<br><table border="1"> <tr> <td>1</td> <td>Yes</td> </tr> <tr> <td>0</td> <td>No</td> </tr> </table>                                                                                                   | 1 | Yes                  | 0 | No                                      |   |              |
| 1   | Yes                                     |                                                                                                                           |                                                                                                                                                                                                                |   |                      |   |                                         |   |              |
| 0   | No                                      |                                                                                                                           |                                                                                                                                                                                                                |   |                      |   |                                         |   |              |
| 501 | cvpco2_3ev                              | Central Venous PCO2                                                                                                       | text                                                                                                                                                                                                           |   |                      |   |                                         |   |              |
| 502 | cvpo2_3ev                               | Central Venous PO2                                                                                                        | text                                                                                                                                                                                                           |   |                      |   |                                         |   |              |
| 503 | cvso2_3ev                               | Central Venous SO2                                                                                                        | text                                                                                                                                                                                                           |   |                      |   |                                         |   |              |
| 504 | mixed_venous_gas_3ev                    | Mixed Venous Gas                                                                                                          | dropdown<br><table border="1"> <tr> <td>1</td> <td>Yes</td> </tr> <tr> <td>0</td> <td>No</td> </tr> </table>                                                                                                   | 1 | Yes                  | 0 | No                                      |   |              |
| 1   | Yes                                     |                                                                                                                           |                                                                                                                                                                                                                |   |                      |   |                                         |   |              |
| 0   | No                                      |                                                                                                                           |                                                                                                                                                                                                                |   |                      |   |                                         |   |              |
| 505 | mixed_venous_pco2_3ev                   | Mixed Venous PCO2                                                                                                         | text                                                                                                                                                                                                           |   |                      |   |                                         |   |              |
| 506 | mixed_venous_po2_3ev                    | Mixed Venous PO2                                                                                                          | text                                                                                                                                                                                                           |   |                      |   |                                         |   |              |
| 507 | mixed_venous_so2_3ev                    | Mixed Venous SpO2                                                                                                         | text                                                                                                                                                                                                           |   |                      |   |                                         |   |              |
| 508 | cvp_3ev                                 | Section Header: <i>Other</i><br>CVP cm H2 High<br><i>Please record the highest in the last 24 hr</i>                      | text                                                                                                                                                                                                           |   |                      |   |                                         |   |              |
| 509 | cvp2_c71_3ev                            | CVP cm H2 Low<br><i>Please record the lowest in the last 24 hr</i>                                                        | text                                                                                                                                                                                                           |   |                      |   |                                         |   |              |
| 510 | iv_fluid_3ev                            | Total IV fluid given in the previous 24 hr                                                                                | text                                                                                                                                                                                                           |   |                      |   |                                         |   |              |
| 511 | urinary_output_3ev                      | Urinary Output ml/24hr<br><i>Please record the urinary output of the previous 24 hr.</i>                                  | text                                                                                                                                                                                                           |   |                      |   |                                         |   |              |
| 512 | arf_3ev                                 | Acute renal failure?                                                                                                      | dropdown<br><table border="1"> <tr> <td>1</td> <td>Yes</td> </tr> <tr> <td>0</td> <td>No</td> </tr> </table>                                                                                                   | 1 | Yes                  | 0 | No                                      |   |              |
| 1   | Yes                                     |                                                                                                                           |                                                                                                                                                                                                                |   |                      |   |                                         |   |              |
| 0   | No                                      |                                                                                                                           |                                                                                                                                                                                                                |   |                      |   |                                         |   |              |
| 513 | cardiac_output_3ev                      | Cardiac Output                                                                                                            | dropdown<br><table border="1"> <tr> <td>1</td> <td>Measured with NICCOM</td> </tr> <tr> <td>2</td> <td>Measured with Pulmonary artery catheter</td> </tr> <tr> <td>0</td> <td>Not measured</td> </tr> </table> | 1 | Measured with NICCOM | 2 | Measured with Pulmonary artery catheter | 0 | Not measured |
| 1   | Measured with NICCOM                    |                                                                                                                           |                                                                                                                                                                                                                |   |                      |   |                                         |   |              |
| 2   | Measured with Pulmonary artery catheter |                                                                                                                           |                                                                                                                                                                                                                |   |                      |   |                                         |   |              |
| 0   | Not measured                            |                                                                                                                           |                                                                                                                                                                                                                |   |                      |   |                                         |   |              |
| 514 | co_value_1_3ev                          | Cardiac Output Value High                                                                                                 | text                                                                                                                                                                                                           |   |                      |   |                                         |   |              |
| 515 | co_value_4_3ev                          | Cardiac Output Value Low                                                                                                  | text                                                                                                                                                                                                           |   |                      |   |                                         |   |              |
| 516 | stroke_volume_3ev                       | Stroke Volume High                                                                                                        | text                                                                                                                                                                                                           |   |                      |   |                                         |   |              |
| 517 | stroke_volume_2_3ev                     | Stroke Volume Low                                                                                                         | text                                                                                                                                                                                                           |   |                      |   |                                         |   |              |
| 518 | cardiac_index_3ev                       | Cardiac index High                                                                                                        | text                                                                                                                                                                                                           |   |                      |   |                                         |   |              |
| 519 | cardiac_index_2_3ev                     | Cardiac index Low                                                                                                         | text                                                                                                                                                                                                           |   |                      |   |                                         |   |              |
| 520 | dopa_dose_3ev                           | Section Header: <i>Vasopressors</i><br>Dopamine Dose mcg/min (HIGH)<br><i>Please record the highest in the last 24 hr</i> | text                                                                                                                                                                                                           |   |                      |   |                                         |   |              |
| 521 | dopa_dose2_675_3ev                      | Dopamine Dose mcg/Kg/min (HIGH)                                                                                           | calc<br>Calculation: [dopa_dose_3ev]/[weight_3ev]                                                                                                                                                              |   |                      |   |                                         |   |              |
| 522 | dopa_doselow_3ev                        | Dopamine Dose mcg/min (LOW)<br><i>Please record the lowest in the last 24 hr</i>                                          | text                                                                                                                                                                                                           |   |                      |   |                                         |   |              |
| 523 | dopa_dose2_6752_630_3ev                 | Dopamine Dose mcg/Kg/min (LOW)                                                                                            | calc<br>Calculation: [dopa_doselow_3ev]/[weight_3ev]                                                                                                                                                           |   |                      |   |                                         |   |              |
| 524 | dobuta_dose_3ev                         | Dobutamine Dose mcg/Min (HIGH)<br><i>Please record the highest in the last 24 hr</i>                                      | text                                                                                                                                                                                                           |   |                      |   |                                         |   |              |
| 525 | dobuta_dose2_ac0_3ev                    | Dobutamine Dose mcg/Kg/Min (HIGH)                                                                                         | calc<br>Calculation: [dobuta_dose_3ev]/[weight_3ev]                                                                                                                                                            |   |                      |   |                                         |   |              |
| 526 | dobuta_doselow_3ev                      | Dobutamine Dose mcg/Min (LOW)<br><i>Please record the lowest in the last 24 hr</i>                                        | text                                                                                                                                                                                                           |   |                      |   |                                         |   |              |
| 527 | dobuta_dose2_ac02_ecc_3ev               | Dobutamine Dose mcg/Kg/Min (LOW)                                                                                          | calc<br>Calculation: [dobuta_doselow_3ev]/[weight_3ev]                                                                                                                                                         |   |                      |   |                                         |   |              |
| 528 | norepi_dose_3ev                         | Norepinephrine Dose mcg/Min (HIGH)<br><i>Please record the highest in the last 24 hr</i>                                  | text                                                                                                                                                                                                           |   |                      |   |                                         |   |              |
| 529 | norepi_dose2_6fa_3ev                    | Norepinephrine Dose mcg/Kg/Min (HIGH)                                                                                     | calc<br>Calculation: [norepi_dose_3ev]/[weight_3ev]                                                                                                                                                            |   |                      |   |                                         |   |              |

|     |                                |                                                                                             |                                                                                                              |   |     |   |    |
|-----|--------------------------------|---------------------------------------------------------------------------------------------|--------------------------------------------------------------------------------------------------------------|---|-----|---|----|
| 530 | norepi_doselow_3ev             | Norepinephrine Dose mcg/Min (LOW)<br><i>Please record the lowest in the last 24 hr</i>      | text                                                                                                         |   |     |   |    |
| 531 | norepi_dose2_6fa2_93a_3ev      | Norepinephrine Dose mcg/Kg/Min (LOW)                                                        | calc<br>Calculation: [norepi_doselow_3ev]/[weight_3ev]                                                       |   |     |   |    |
| 532 | epi_dose_3ev                   | Epinephrine Dose mcg/Min (HIGH)<br><i>Please record the highest in the last 24 hr</i>       | text                                                                                                         |   |     |   |    |
| 533 | epi_dose2_ca0_3ev              | Epinephrine Dose mcg/Kg/Min (HIGH)                                                          | calc<br>Calculation: [epi_dose_3ev]/[weight_3ev]                                                             |   |     |   |    |
| 534 | epi_doselow_3ev                | Epinephrine Dose mcg/Min (LOW)<br><i>Please record the lowest in the last 24 hr</i>         | text                                                                                                         |   |     |   |    |
| 535 | epi_dose2_ca02_fe4_3ev         | Epinephrine Dose mcg/Kg/Min (LOW)                                                           | calc<br>Calculation: [epi_doselow_3ev]/[weight_3ev]                                                          |   |     |   |    |
| 536 | phenylephrine_dose_3ev         | Phenylephrine Dose mcg/Min (HIGH)<br><i>Please record the highest in the last 24 hr</i>     | text                                                                                                         |   |     |   |    |
| 537 | phenylephrine_dose2_cd9_3ev    | Phenylephrine Dose mcg/Kg/Min (HIGH)                                                        | calc<br>Calculation: [phenylephrine_dose_3ev]/[weight_3ev]                                                   |   |     |   |    |
| 538 | phenylephrine_doselow_3ev      | Phenylephrine Dose mcg/Min (LOW)<br><i>Please record the lowest in the last 24 hr</i>       | text                                                                                                         |   |     |   |    |
| 539 | phenylephrine_dose2_c2_4e5_3ev | Phenylephrine Dose mcg/Kg/Min (LOW)                                                         | calc<br>Calculation: [phenylephrine_doselow_3ev]/[weight_3ev]                                                |   |     |   |    |
| 540 | milrinone_dose_3ev             | Milrinone dose Mcg/min (HIGH)<br><i>Please record the highest in the last 24 hr</i>         | text                                                                                                         |   |     |   |    |
| 541 | milrinone_dose2_b0e_3ev        | Milrinone dose Mcg/Kg/min (HIGH)                                                            | calc<br>Calculation: [milrinone_dose_3ev]/[weight_3ev]                                                       |   |     |   |    |
| 542 | milrinone_doselow_3ev          | Milrinone dose Mcg/min (LOW)<br><i>Please record the lowest in the last 24 hr</i>           | text                                                                                                         |   |     |   |    |
| 543 | milrinone_dose2_b0e2_23d_3ev   | Milrinone dose Mcg/Kg/min (LOW)                                                             | calc<br>Calculation: [milrinone_doselow_3ev]/[weight_3ev]                                                    |   |     |   |    |
| 544 | vasopressin_dose_3ev           | Vasopressin dose U/min (HIGH)<br><i>Please record the highest in the last 24 hr</i>         | text                                                                                                         |   |     |   |    |
| 545 | vasopressin_dose2_b17_3ev      | Vasopressin dose U/min (LOW)<br><i>Please record the lowest in the last 24 hr</i>           | text                                                                                                         |   |     |   |    |
| 546 | propofol_3ev                   | Section Header: <i>Ventilation &amp; supplemental oxygen</i><br>Is the patient on propofol? | dropdown<br><table border="1"> <tr> <td>1</td> <td>Yes</td> </tr> <tr> <td>0</td> <td>No</td> </tr> </table> | 1 | Yes | 0 | No |
| 1   | Yes                            |                                                                                             |                                                                                                              |   |     |   |    |
| 0   | No                             |                                                                                             |                                                                                                              |   |     |   |    |
| 547 | invasive_ventilation_3ev       | Invasive ventilation?                                                                       | text                                                                                                         |   |     |   |    |
| 548 | intubation_date_3ev            | Intubation date                                                                             | text                                                                                                         |   |     |   |    |
| 549 | intubation_lowest_rr_3ev       | Was the patient intubated during the lowest RR?                                             | text                                                                                                         |   |     |   |    |
| 550 | ventilation_mode_3ev           | Ventilation mode                                                                            | text                                                                                                         |   |     |   |    |
| 551 | peep_pc_vc_3ev                 | PEEP                                                                                        | text                                                                                                         |   |     |   |    |
| 552 | pip_pc_vc_3ev                  | PIP (Inspiratory pressure)                                                                  | text                                                                                                         |   |     |   |    |
| 553 | itime_pc_3ev                   | Inspiratory Time (Itime) seconds                                                            | text                                                                                                         |   |     |   |    |
| 554 | tidal_vol_pc_vc_high_3ev       | Tidal Volume High<br><i>Please record the highest in the last 24 hr</i>                     | text                                                                                                         |   |     |   |    |
| 555 | tidal_vol_pc_vc_low_3ev        | Tidal Volume Low<br><i>Please record the lowest in the last 24 hr</i>                       | text                                                                                                         |   |     |   |    |
| 556 | minute_vent_pc_vc_high_3ev     | Minute Ventilation (HIGH)                                                                   | text                                                                                                         |   |     |   |    |
| 557 | minute_vent_pc_vc_low_3ev      | Minute Ventilation (LOW)                                                                    | text                                                                                                         |   |     |   |    |
| 558 | p_plateu_3ev                   | P Plateu                                                                                    | text                                                                                                         |   |     |   |    |
| 559 | compliance_3ev                 | Compliance                                                                                  | text                                                                                                         |   |     |   |    |
| 560 | flow_rate_pc_vc_3ev            | Flow rate                                                                                   | text                                                                                                         |   |     |   |    |
| 561 | peep_spontaneous_3ev           | PEEP                                                                                        | text                                                                                                         |   |     |   |    |
| 562 | pressure_above_peep_spont_3ev  | Pressure above PEEP                                                                         | text                                                                                                         |   |     |   |    |
| 563 | ex_tidal_vol_spont_high_3ev    | Exhaled tidal volume HIGH<br><i>Please record the highest in the last 24 hr</i>             | text                                                                                                         |   |     |   |    |
| 564 | ex_tidal_vol_spont_low_3ev     | Exhaled tidal volume Low<br><i>Please record the lowest in the last 24 hr</i>               | text                                                                                                         |   |     |   |    |
| 565 | resp_rate_pc_vc_spont_high_3ev | Respiratory Rate (HIGH)                                                                     | text                                                                                                         |   |     |   |    |
| 566 | resp_rate_pc_vc_spont_low_3ev  | Respiratory Rate (LOW)                                                                      | text                                                                                                         |   |     |   |    |
| 567 | minute_vent_spont_high_3ev     | Minute ventilation High<br><i>Please record the highest in the last 24 hr</i>               | text                                                                                                         |   |     |   |    |
| 568 | minute_vent_spont_low_3ev      | Minute ventilation Low<br><i>Please record the lowest in the last 24 hr</i>                 | text                                                                                                         |   |     |   |    |

|                                                          |                                                              |                                                                                                                                   |                                                        |
|----------------------------------------------------------|--------------------------------------------------------------|-----------------------------------------------------------------------------------------------------------------------------------|--------------------------------------------------------|
| 569                                                      | inspiratory_pressure_3ev                                     | Inspiratory pressure                                                                                                              | text                                                   |
| 570                                                      | supplemental_3ev                                             | Supplemental O2 Device                                                                                                            | text                                                   |
| 571                                                      | liters_oxygen_3ev                                            | Liters/Min                                                                                                                        | text                                                   |
| 572                                                      | set_fio2_3ev                                                 | Set Fio2                                                                                                                          | text                                                   |
| 573                                                      | calculated_fio2_3ev                                          | Calculated Fio2                                                                                                                   | text                                                   |
| 574                                                      | fio2_3ev                                                     | FiO2 %<br><i>Please record the FIO2 when the worst ABG was taken</i>                                                              | text                                                   |
| 575                                                      | pafi2_3ev                                                    | PaO2/FiO2                                                                                                                         | text                                                   |
| 576                                                      | pafi1_3ev                                                    | PaO2/FiO2                                                                                                                         | calc<br>Calculation: [po2_3ev]/([fio2_3ev]/100)        |
| 577                                                      | aado21_3ev                                                   | AaDO2                                                                                                                             | text                                                   |
| 578                                                      | glasgow_3ev                                                  | Glasgow                                                                                                                           | text                                                   |
| 579                                                      | geye_3ev                                                     | GCS Eye                                                                                                                           | text                                                   |
| 580                                                      | gcs_verbal_3ev                                               | GCS verbal                                                                                                                        | text                                                   |
| 581                                                      | gcs_motor_3ev                                                | GCS Motor                                                                                                                         | text                                                   |
| 582                                                      | gcs_total_3ev                                                | GCS Total                                                                                                                         | text                                                   |
| 583                                                      | transfusion_3ev                                              | Transfusion during the past 2 days?                                                                                               | text                                                   |
| 584                                                      | number_transfusion_3ev                                       | Total number of transfusions given                                                                                                | text                                                   |
| 585                                                      | transfusion_2_3ev                                            | Different type of transfusion?                                                                                                    | text                                                   |
| 586                                                      | hrv_yes_no_3ev                                               | Section Header: <i>Heart Rate Variability</i><br>HRV monitored?                                                                   | yesno<br>1 Yes<br>0 No                                 |
| 587                                                      | hrva_1_day_3ev                                               | HRV-a                                                                                                                             | text                                                   |
| 588                                                      | hrvb_1_day_3ev                                               | HRV-b                                                                                                                             | text                                                   |
| 589                                                      | hrvc_1_day_3ev                                               | HRV-c                                                                                                                             | text                                                   |
| 590                                                      | hrvd_day_1_3ev                                               | HRV-d                                                                                                                             | text                                                   |
| 591                                                      | third_evaluation_imported_complete                           | Section Header: <i>Form Status</i><br>Complete?                                                                                   | dropdown<br>0 Incomplete<br>1 Unverified<br>2 Complete |
| Instrument: <b>Prognostic Scores</b> (prognostic_scores) |                                                              |                                                                                                                                   |                                                        |
| 592                                                      | apache_2                                                     | APACHE II                                                                                                                         | text                                                   |
| 593                                                      | apache                                                       | APACHE III<br><a href="http://www.quesgen.com/Apachelll.php">http://www.quesgen.com/Apachelll.php</a>                             | text                                                   |
| 594                                                      | sofa_1                                                       | SOFA Initial evaluation                                                                                                           | text                                                   |
| 595                                                      | sofa_2                                                       | SOFA Second evaluation                                                                                                            | text                                                   |
| 596                                                      | sofa_3                                                       | SOFA Third evaluation                                                                                                             | text                                                   |
| 597                                                      | apche_excel                                                  | APACHE II excel                                                                                                                   | text                                                   |
| 598                                                      | prognostic_scores_complete                                   | Section Header: <i>Form Status</i><br>Complete?                                                                                   | dropdown<br>0 Incomplete<br>1 Unverified<br>2 Complete |
| Instrument: <b>ARDS</b> (ards)                           |                                                              |                                                                                                                                   |                                                        |
| 599                                                      | ards_suspicion                                               | Patient with suspicion of ARDS?                                                                                                   | dropdown<br>1 Yes<br>0 No                              |
| 600                                                      | timing<br>Show the field ONLY if:<br>[ards_suspicion] = '1'  | Timing: Within 1 week of a known clinical insult or new/worsening respiratory symptoms                                            | dropdown<br>1 Yes<br>0 No                              |
| 601                                                      | ards_date                                                    | Date of onset                                                                                                                     | text (date_mdy)                                        |
| 602                                                      | imaging<br>Show the field ONLY if:<br>[ards_suspicion] = '1' | Chest imaging (X ray or CT) with bilateral opacities<br><i>Not fully explained by effusions, lobar/lung collapse, or nodules.</i> | dropdown<br>1 Yes<br>0 No                              |

|     |                                                                    |                                                                                                                                                                                                                   |                                                                                              |
|-----|--------------------------------------------------------------------|-------------------------------------------------------------------------------------------------------------------------------------------------------------------------------------------------------------------|----------------------------------------------------------------------------------------------|
| 603 | edema_origin<br>Show the field ONLY if:<br>[ards_suspicion] = '1'  | Origin of edema: Respiratory failure not fully explained by cardiac failure or fluid overload<br><i>Need objective assessment (e.g., echocardiography) to exclude hydrostatic edema if no risk factor present</i> | dropdown<br>1 Yes<br>0 No                                                                    |
| 604 | fio2_ards<br>Show the field ONLY if:<br>[ards_suspicion] = '1'     | Pa/FiO2                                                                                                                                                                                                           | text                                                                                         |
| 605 | severity_ards<br>Show the field ONLY if:<br>[ards_suspicion] = '1' | Severity of ARDS<br><i>All of them with PEEP or CPAP &gt; or = 5 cmH2O</i>                                                                                                                                        | dropdown<br>1 Mild (FiO2 300-201)<br>2 Moderate (FiO2 200-101)<br>3 Severe (FiO2 < or = 100) |
| 606 | ph_postintub                                                       | Section Header: <i>ABG Post-Intubation</i><br>Ph                                                                                                                                                                  | text                                                                                         |
| 607 | po2_potsintub                                                      | Po2                                                                                                                                                                                                               | text                                                                                         |
| 608 | pco2_postintub                                                     | PCo2                                                                                                                                                                                                              | text                                                                                         |
| 609 | bicarbonte_postintub                                               | Bicarbonate                                                                                                                                                                                                       | text                                                                                         |
| 610 | fio2_post_intub                                                    | Fio2                                                                                                                                                                                                              | text                                                                                         |
| 611 | pronation<br>Show the field ONLY if:<br>[ards_suspicion] = '1'     | Section Header: <i>Pronation</i><br>Was the patient pronated?                                                                                                                                                     | dropdown<br>1 Yes<br>0 No                                                                    |
| 612 | date_pronat<br>Show the field ONLY if:<br>[pronation] = '1'        | Date of pronation                                                                                                                                                                                                 | text (date_mdy)                                                                              |
| 613 | abg_pronat                                                         | ABG Post-pronation                                                                                                                                                                                                | dropdown<br>1 Yes<br>0 No                                                                    |
| 614 | ph_pronat<br>Show the field ONLY if:<br>[abg_pronat] = '1'         | Ph                                                                                                                                                                                                                | text                                                                                         |
| 615 | po2_pronat<br>Show the field ONLY if:<br>[abg_pronat] = '1'        | PO2                                                                                                                                                                                                               | text                                                                                         |
| 616 | pco2_pronat<br>Show the field ONLY if:<br>[abg_pronat] = '1'       | PCo2                                                                                                                                                                                                              | text                                                                                         |
| 617 | so2_pronat<br>Show the field ONLY if:<br>[abg_pronat] = '1'        | SO2                                                                                                                                                                                                               | text                                                                                         |
| 618 | bicarb_pronat<br>Show the field ONLY if:<br>[abg_pronat] = '1'     | Bicarbonate                                                                                                                                                                                                       | text                                                                                         |
| 619 | horus_pronat<br>Show the field ONLY if:<br>[pronation] = '1'       | Hours of pronation                                                                                                                                                                                                | text                                                                                         |
| 620 | end_of_pronat<br>Show the field ONLY if:<br>[pronation] = '1'      | Date of end of pronation                                                                                                                                                                                          | text (date_mdy)                                                                              |
| 621 | mode_pronat<br>Show the field ONLY if:<br>[pronation] = '1'        | Section Header: <i>Ventilator settings during pronation</i><br>Mode                                                                                                                                               | dropdown<br>1 Pressure Control<br>2 Volume Control                                           |
| 622 | rr_pronation_high<br>Show the field ONLY if:<br>[pronation] = '1'  | Respiratory Rate During pronation (High)                                                                                                                                                                          | text                                                                                         |
| 623 | rr_ponat_low<br>Show the field ONLY if:<br>[pronation] = '1'       | Respiratory Rate during pronation (LOW)                                                                                                                                                                           | text                                                                                         |
| 624 | tidal_vol_pronat<br>Show the field ONLY if:<br>[pronation] = '1'   | Tidal Volume                                                                                                                                                                                                      | text                                                                                         |

|                                                      |                                                                    |                                                                                                                        |                                                                                                                                                                                                                                                                                                                                                                                                                                                                                                                                                                                                                                                                                                                                                                          |   |                   |                  |            |                   |                                       |   |                   |                                                                          |   |                   |           |   |                   |                       |   |                   |                                                                     |   |                   |                                                                                     |
|------------------------------------------------------|--------------------------------------------------------------------|------------------------------------------------------------------------------------------------------------------------|--------------------------------------------------------------------------------------------------------------------------------------------------------------------------------------------------------------------------------------------------------------------------------------------------------------------------------------------------------------------------------------------------------------------------------------------------------------------------------------------------------------------------------------------------------------------------------------------------------------------------------------------------------------------------------------------------------------------------------------------------------------------------|---|-------------------|------------------|------------|-------------------|---------------------------------------|---|-------------------|--------------------------------------------------------------------------|---|-------------------|-----------|---|-------------------|-----------------------|---|-------------------|---------------------------------------------------------------------|---|-------------------|-------------------------------------------------------------------------------------|
| 625                                                  | fio2_pronat<br>Show the field ONLY if: [pronation] = '1'           | FiO2                                                                                                                   | text                                                                                                                                                                                                                                                                                                                                                                                                                                                                                                                                                                                                                                                                                                                                                                     |   |                   |                  |            |                   |                                       |   |                   |                                                                          |   |                   |           |   |                   |                       |   |                   |                                                                     |   |                   |                                                                                     |
| 626                                                  | peep_pronat<br>Show the field ONLY if: [pronation] = '1'           | PEEP                                                                                                                   | text                                                                                                                                                                                                                                                                                                                                                                                                                                                                                                                                                                                                                                                                                                                                                                     |   |                   |                  |            |                   |                                       |   |                   |                                                                          |   |                   |           |   |                   |                       |   |                   |                                                                     |   |                   |                                                                                     |
| 627                                                  | p_plateu_pronat<br>Show the field ONLY if: [pronation] = '1'       | P plateu                                                                                                               | text                                                                                                                                                                                                                                                                                                                                                                                                                                                                                                                                                                                                                                                                                                                                                                     |   |                   |                  |            |                   |                                       |   |                   |                                                                          |   |                   |           |   |                   |                       |   |                   |                                                                     |   |                   |                                                                                     |
| 628                                                  | compliance_pronat<br>Show the field ONLY if: [pronation] = '1'     | Compliance                                                                                                             | text                                                                                                                                                                                                                                                                                                                                                                                                                                                                                                                                                                                                                                                                                                                                                                     |   |                   |                  |            |                   |                                       |   |                   |                                                                          |   |                   |           |   |                   |                       |   |                   |                                                                     |   |                   |                                                                                     |
| 629                                                  | flow_pronat<br>Show the field ONLY if: [mode_pronat] = '2'         | Peak Inspiratory Flow                                                                                                  | text                                                                                                                                                                                                                                                                                                                                                                                                                                                                                                                                                                                                                                                                                                                                                                     |   |                   |                  |            |                   |                                       |   |                   |                                                                          |   |                   |           |   |                   |                       |   |                   |                                                                     |   |                   |                                                                                     |
| 630                                                  | pip_pronat<br>Show the field ONLY if: [mode_pronat] = '2'          | PIP                                                                                                                    | text                                                                                                                                                                                                                                                                                                                                                                                                                                                                                                                                                                                                                                                                                                                                                                     |   |                   |                  |            |                   |                                       |   |                   |                                                                          |   |                   |           |   |                   |                       |   |                   |                                                                     |   |                   |                                                                                     |
| 631                                                  | neuromusc_block                                                    | Section Header: <i>Neuromuscular blockade? Pulmonary vasodilation</i><br>Was the patient under neuromuscular blockade? | dropdown<br><table border="1"> <tr><td>1</td><td>Yes</td></tr> <tr><td>0</td><td>No</td></tr> </table>                                                                                                                                                                                                                                                                                                                                                                                                                                                                                                                                                                                                                                                                   | 1 | Yes               | 0                | No         |                   |                                       |   |                   |                                                                          |   |                   |           |   |                   |                       |   |                   |                                                                     |   |                   |                                                                                     |
| 1                                                    | Yes                                                                |                                                                                                                        |                                                                                                                                                                                                                                                                                                                                                                                                                                                                                                                                                                                                                                                                                                                                                                          |   |                   |                  |            |                   |                                       |   |                   |                                                                          |   |                   |           |   |                   |                       |   |                   |                                                                     |   |                   |                                                                                     |
| 0                                                    | No                                                                 |                                                                                                                        |                                                                                                                                                                                                                                                                                                                                                                                                                                                                                                                                                                                                                                                                                                                                                                          |   |                   |                  |            |                   |                                       |   |                   |                                                                          |   |                   |           |   |                   |                       |   |                   |                                                                     |   |                   |                                                                                     |
| 632                                                  | vasodilators                                                       | Was the patient under pulmonary vasodilators?                                                                          | dropdown<br><table border="1"> <tr><td>1</td><td>Yes</td></tr> <tr><td>0</td><td>No</td></tr> </table>                                                                                                                                                                                                                                                                                                                                                                                                                                                                                                                                                                                                                                                                   | 1 | Yes               | 0                | No         |                   |                                       |   |                   |                                                                          |   |                   |           |   |                   |                       |   |                   |                                                                     |   |                   |                                                                                     |
| 1                                                    | Yes                                                                |                                                                                                                        |                                                                                                                                                                                                                                                                                                                                                                                                                                                                                                                                                                                                                                                                                                                                                                          |   |                   |                  |            |                   |                                       |   |                   |                                                                          |   |                   |           |   |                   |                       |   |                   |                                                                     |   |                   |                                                                                     |
| 0                                                    | No                                                                 |                                                                                                                        |                                                                                                                                                                                                                                                                                                                                                                                                                                                                                                                                                                                                                                                                                                                                                                          |   |                   |                  |            |                   |                                       |   |                   |                                                                          |   |                   |           |   |                   |                       |   |                   |                                                                     |   |                   |                                                                                     |
| 633                                                  | vasodilator<br>Show the field ONLY if: [vasodilators] = '1'        | Vasodilator name                                                                                                       | checkbox<br><table border="1"> <tr><td>1</td><td>vasodilator__1</td><td>Nitric Oxide</td></tr> <tr><td>2</td><td>vasodilator__2</td><td>Epoprostenol</td></tr> <tr><td>3</td><td>vasodilator__3</td><td>Sildenafil</td></tr> <tr><td>4</td><td>vasodilator__4</td><td>Iloprost</td></tr> <tr><td>5</td><td>vasodilator__5</td><td>Bosentan</td></tr> </table>                                                                                                                                                                                                                                                                                                                                                                                                            | 1 | vasodilator__1    | Nitric Oxide     | 2          | vasodilator__2    | Epoprostenol                          | 3 | vasodilator__3    | Sildenafil                                                               | 4 | vasodilator__4    | Iloprost  | 5 | vasodilator__5    | Bosentan              |   |                   |                                                                     |   |                   |                                                                                     |
| 1                                                    | vasodilator__1                                                     | Nitric Oxide                                                                                                           |                                                                                                                                                                                                                                                                                                                                                                                                                                                                                                                                                                                                                                                                                                                                                                          |   |                   |                  |            |                   |                                       |   |                   |                                                                          |   |                   |           |   |                   |                       |   |                   |                                                                     |   |                   |                                                                                     |
| 2                                                    | vasodilator__2                                                     | Epoprostenol                                                                                                           |                                                                                                                                                                                                                                                                                                                                                                                                                                                                                                                                                                                                                                                                                                                                                                          |   |                   |                  |            |                   |                                       |   |                   |                                                                          |   |                   |           |   |                   |                       |   |                   |                                                                     |   |                   |                                                                                     |
| 3                                                    | vasodilator__3                                                     | Sildenafil                                                                                                             |                                                                                                                                                                                                                                                                                                                                                                                                                                                                                                                                                                                                                                                                                                                                                                          |   |                   |                  |            |                   |                                       |   |                   |                                                                          |   |                   |           |   |                   |                       |   |                   |                                                                     |   |                   |                                                                                     |
| 4                                                    | vasodilator__4                                                     | Iloprost                                                                                                               |                                                                                                                                                                                                                                                                                                                                                                                                                                                                                                                                                                                                                                                                                                                                                                          |   |                   |                  |            |                   |                                       |   |                   |                                                                          |   |                   |           |   |                   |                       |   |                   |                                                                     |   |                   |                                                                                     |
| 5                                                    | vasodilator__5                                                     | Bosentan                                                                                                               |                                                                                                                                                                                                                                                                                                                                                                                                                                                                                                                                                                                                                                                                                                                                                                          |   |                   |                  |            |                   |                                       |   |                   |                                                                          |   |                   |           |   |                   |                       |   |                   |                                                                     |   |                   |                                                                                     |
| 634                                                  | ards_complete                                                      | Section Header: <i>Form Status</i><br>Complete?                                                                        | dropdown<br><table border="1"> <tr><td>0</td><td>Incomplete</td></tr> <tr><td>1</td><td>Unverified</td></tr> <tr><td>2</td><td>Complete</td></tr> </table>                                                                                                                                                                                                                                                                                                                                                                                                                                                                                                                                                                                                               | 0 | Incomplete        | 1                | Unverified | 2                 | Complete                              |   |                   |                                                                          |   |                   |           |   |                   |                       |   |                   |                                                                     |   |                   |                                                                                     |
| 0                                                    | Incomplete                                                         |                                                                                                                        |                                                                                                                                                                                                                                                                                                                                                                                                                                                                                                                                                                                                                                                                                                                                                                          |   |                   |                  |            |                   |                                       |   |                   |                                                                          |   |                   |           |   |                   |                       |   |                   |                                                                     |   |                   |                                                                                     |
| 1                                                    | Unverified                                                         |                                                                                                                        |                                                                                                                                                                                                                                                                                                                                                                                                                                                                                                                                                                                                                                                                                                                                                                          |   |                   |                  |            |                   |                                       |   |                   |                                                                          |   |                   |           |   |                   |                       |   |                   |                                                                     |   |                   |                                                                                     |
| 2                                                    | Complete                                                           |                                                                                                                        |                                                                                                                                                                                                                                                                                                                                                                                                                                                                                                                                                                                                                                                                                                                                                                          |   |                   |                  |            |                   |                                       |   |                   |                                                                          |   |                   |           |   |                   |                       |   |                   |                                                                     |   |                   |                                                                                     |
| Instrument: <b>Sepsis spectrum</b> (sepsis_spectrum) |                                                                    |                                                                                                                        |                                                                                                                                                                                                                                                                                                                                                                                                                                                                                                                                                                                                                                                                                                                                                                          |   |                   |                  |            |                   |                                       |   |                   |                                                                          |   |                   |           |   |                   |                       |   |                   |                                                                     |   |                   |                                                                                     |
| 635                                                  | sirs                                                               | SIRS?                                                                                                                  | dropdown<br><table border="1"> <tr><td>1</td><td>Yes</td></tr> <tr><td>0</td><td>No</td></tr> </table>                                                                                                                                                                                                                                                                                                                                                                                                                                                                                                                                                                                                                                                                   | 1 | Yes               | 0                | No         |                   |                                       |   |                   |                                                                          |   |                   |           |   |                   |                       |   |                   |                                                                     |   |                   |                                                                                     |
| 1                                                    | Yes                                                                |                                                                                                                        |                                                                                                                                                                                                                                                                                                                                                                                                                                                                                                                                                                                                                                                                                                                                                                          |   |                   |                  |            |                   |                                       |   |                   |                                                                          |   |                   |           |   |                   |                       |   |                   |                                                                     |   |                   |                                                                                     |
| 0                                                    | No                                                                 |                                                                                                                        |                                                                                                                                                                                                                                                                                                                                                                                                                                                                                                                                                                                                                                                                                                                                                                          |   |                   |                  |            |                   |                                       |   |                   |                                                                          |   |                   |           |   |                   |                       |   |                   |                                                                     |   |                   |                                                                                     |
| 636                                                  | sepsis_suspicion                                                   | Sepsis suspicion?                                                                                                      | dropdown<br><table border="1"> <tr><td>1</td><td>Yes</td></tr> <tr><td>0</td><td>No</td></tr> </table>                                                                                                                                                                                                                                                                                                                                                                                                                                                                                                                                                                                                                                                                   | 1 | Yes               | 0                | No         |                   |                                       |   |                   |                                                                          |   |                   |           |   |                   |                       |   |                   |                                                                     |   |                   |                                                                                     |
| 1                                                    | Yes                                                                |                                                                                                                        |                                                                                                                                                                                                                                                                                                                                                                                                                                                                                                                                                                                                                                                                                                                                                                          |   |                   |                  |            |                   |                                       |   |                   |                                                                          |   |                   |           |   |                   |                       |   |                   |                                                                     |   |                   |                                                                                     |
| 0                                                    | No                                                                 |                                                                                                                        |                                                                                                                                                                                                                                                                                                                                                                                                                                                                                                                                                                                                                                                                                                                                                                          |   |                   |                  |            |                   |                                       |   |                   |                                                                          |   |                   |           |   |                   |                       |   |                   |                                                                     |   |                   |                                                                                     |
| 637                                                  | sepsis_general<br>Show the field ONLY if: [sepsis_suspicion] = '1' | General variables                                                                                                      | checkbox<br><table border="1"> <tr><td>1</td><td>sepsis_general__1</td><td>Fever (&gt; 38.3°C)</td></tr> <tr><td>2</td><td>sepsis_general__2</td><td>Hypothermia (core temperature &lt; 36°C)</td></tr> <tr><td>3</td><td>sepsis_general__3</td><td>Heart rate &gt; 90/min-1 or more than two sd above the normal value for age</td></tr> <tr><td>4</td><td>sepsis_general__4</td><td>Tachypnea</td></tr> <tr><td>5</td><td>sepsis_general__5</td><td>Altered mental status</td></tr> <tr><td>6</td><td>sepsis_general__6</td><td>Significant edema or positive fluid balance (&gt; 20 mL/kg over 24 hr)</td></tr> <tr><td>7</td><td>sepsis_general__7</td><td>Hyperglycemia (plasma glucose &gt; 140 mg/dL or 7.7 mmol/L) in the absence of diabetes</td></tr> </table> | 1 | sepsis_general__1 | Fever (> 38.3°C) | 2          | sepsis_general__2 | Hypothermia (core temperature < 36°C) | 3 | sepsis_general__3 | Heart rate > 90/min-1 or more than two sd above the normal value for age | 4 | sepsis_general__4 | Tachypnea | 5 | sepsis_general__5 | Altered mental status | 6 | sepsis_general__6 | Significant edema or positive fluid balance (> 20 mL/kg over 24 hr) | 7 | sepsis_general__7 | Hyperglycemia (plasma glucose > 140 mg/dL or 7.7 mmol/L) in the absence of diabetes |
| 1                                                    | sepsis_general__1                                                  | Fever (> 38.3°C)                                                                                                       |                                                                                                                                                                                                                                                                                                                                                                                                                                                                                                                                                                                                                                                                                                                                                                          |   |                   |                  |            |                   |                                       |   |                   |                                                                          |   |                   |           |   |                   |                       |   |                   |                                                                     |   |                   |                                                                                     |
| 2                                                    | sepsis_general__2                                                  | Hypothermia (core temperature < 36°C)                                                                                  |                                                                                                                                                                                                                                                                                                                                                                                                                                                                                                                                                                                                                                                                                                                                                                          |   |                   |                  |            |                   |                                       |   |                   |                                                                          |   |                   |           |   |                   |                       |   |                   |                                                                     |   |                   |                                                                                     |
| 3                                                    | sepsis_general__3                                                  | Heart rate > 90/min-1 or more than two sd above the normal value for age                                               |                                                                                                                                                                                                                                                                                                                                                                                                                                                                                                                                                                                                                                                                                                                                                                          |   |                   |                  |            |                   |                                       |   |                   |                                                                          |   |                   |           |   |                   |                       |   |                   |                                                                     |   |                   |                                                                                     |
| 4                                                    | sepsis_general__4                                                  | Tachypnea                                                                                                              |                                                                                                                                                                                                                                                                                                                                                                                                                                                                                                                                                                                                                                                                                                                                                                          |   |                   |                  |            |                   |                                       |   |                   |                                                                          |   |                   |           |   |                   |                       |   |                   |                                                                     |   |                   |                                                                                     |
| 5                                                    | sepsis_general__5                                                  | Altered mental status                                                                                                  |                                                                                                                                                                                                                                                                                                                                                                                                                                                                                                                                                                                                                                                                                                                                                                          |   |                   |                  |            |                   |                                       |   |                   |                                                                          |   |                   |           |   |                   |                       |   |                   |                                                                     |   |                   |                                                                                     |
| 6                                                    | sepsis_general__6                                                  | Significant edema or positive fluid balance (> 20 mL/kg over 24 hr)                                                    |                                                                                                                                                                                                                                                                                                                                                                                                                                                                                                                                                                                                                                                                                                                                                                          |   |                   |                  |            |                   |                                       |   |                   |                                                                          |   |                   |           |   |                   |                       |   |                   |                                                                     |   |                   |                                                                                     |
| 7                                                    | sepsis_general__7                                                  | Hyperglycemia (plasma glucose > 140 mg/dL or 7.7 mmol/L) in the absence of diabetes                                    |                                                                                                                                                                                                                                                                                                                                                                                                                                                                                                                                                                                                                                                                                                                                                                          |   |                   |                  |            |                   |                                       |   |                   |                                                                          |   |                   |           |   |                   |                       |   |                   |                                                                     |   |                   |                                                                                     |

|            |                                                                                        |                                                                                                                                         |                                                                                                                                                                                                                                                                                                                                                                                                                                                                                                                                                                                                                                                                                                                                                                                                                                                                                                                                                                                                                                                                                                                                                                                                                                                                                                                                                                                                                                                                                                                                                  |   |                           |                                                                                                                                         |                   |                           |                                                                                                      |   |                           |                                                       |                        |                           |                                                                   |   |                           |                                                              |       |                   |                                                  |   |                   |                                                                    |
|------------|----------------------------------------------------------------------------------------|-----------------------------------------------------------------------------------------------------------------------------------------|--------------------------------------------------------------------------------------------------------------------------------------------------------------------------------------------------------------------------------------------------------------------------------------------------------------------------------------------------------------------------------------------------------------------------------------------------------------------------------------------------------------------------------------------------------------------------------------------------------------------------------------------------------------------------------------------------------------------------------------------------------------------------------------------------------------------------------------------------------------------------------------------------------------------------------------------------------------------------------------------------------------------------------------------------------------------------------------------------------------------------------------------------------------------------------------------------------------------------------------------------------------------------------------------------------------------------------------------------------------------------------------------------------------------------------------------------------------------------------------------------------------------------------------------------|---|---------------------------|-----------------------------------------------------------------------------------------------------------------------------------------|-------------------|---------------------------|------------------------------------------------------------------------------------------------------|---|---------------------------|-------------------------------------------------------|------------------------|---------------------------|-------------------------------------------------------------------|---|---------------------------|--------------------------------------------------------------|-------|-------------------|--------------------------------------------------|---|-------------------|--------------------------------------------------------------------|
| <p>638</p> | <p>inflammatory_variables<br/>Show the field ONLY if:<br/>[sepsis_suspicion] = '1'</p> | <p>Inflammatory variables</p>                                                                                                           | <p>checkbox</p> <table border="1"> <tr> <td data-bbox="1040 100 1062 128">1</td> <td data-bbox="1062 100 1284 128">inflammatory_variables__1</td> <td data-bbox="1284 100 1521 128">Leukocytosis (WBC count &gt; 12,000 ?L-1)</td> </tr> <tr> <td data-bbox="1040 157 1062 184">2</td> <td data-bbox="1062 157 1284 184">inflammatory_variables__2</td> <td data-bbox="1284 157 1521 184">Leukopenia (WBC count &lt; 4000 ?L-1)</td> </tr> <tr> <td data-bbox="1040 214 1062 241">3</td> <td data-bbox="1062 214 1284 241">inflammatory_variables__3</td> <td data-bbox="1284 214 1521 241">Normal WBC count with greater than 10% immature forms</td> </tr> <tr> <td data-bbox="1040 270 1062 298">4</td> <td data-bbox="1062 270 1284 298">inflammatory_variables__4</td> <td data-bbox="1284 270 1521 298">Plasma C-reactive protein more than two sd above the normal value</td> </tr> <tr> <td data-bbox="1040 327 1062 354">5</td> <td data-bbox="1062 327 1284 354">inflammatory_variables__5</td> <td data-bbox="1284 327 1521 354">Plasma procalcitonin more than two sd above the normal value</td> </tr> </table>                                                                                                                                                                                                                                                                                                                                                                                                                     | 1 | inflammatory_variables__1 | Leukocytosis (WBC count > 12,000 ?L-1)                                                                                                  | 2                 | inflammatory_variables__2 | Leukopenia (WBC count < 4000 ?L-1)                                                                   | 3 | inflammatory_variables__3 | Normal WBC count with greater than 10% immature forms | 4                      | inflammatory_variables__4 | Plasma C-reactive protein more than two sd above the normal value | 5 | inflammatory_variables__5 | Plasma procalcitonin more than two sd above the normal value |       |                   |                                                  |   |                   |                                                                    |
| 1          | inflammatory_variables__1                                                              | Leukocytosis (WBC count > 12,000 ?L-1)                                                                                                  |                                                                                                                                                                                                                                                                                                                                                                                                                                                                                                                                                                                                                                                                                                                                                                                                                                                                                                                                                                                                                                                                                                                                                                                                                                                                                                                                                                                                                                                                                                                                                  |   |                           |                                                                                                                                         |                   |                           |                                                                                                      |   |                           |                                                       |                        |                           |                                                                   |   |                           |                                                              |       |                   |                                                  |   |                   |                                                                    |
| 2          | inflammatory_variables__2                                                              | Leukopenia (WBC count < 4000 ?L-1)                                                                                                      |                                                                                                                                                                                                                                                                                                                                                                                                                                                                                                                                                                                                                                                                                                                                                                                                                                                                                                                                                                                                                                                                                                                                                                                                                                                                                                                                                                                                                                                                                                                                                  |   |                           |                                                                                                                                         |                   |                           |                                                                                                      |   |                           |                                                       |                        |                           |                                                                   |   |                           |                                                              |       |                   |                                                  |   |                   |                                                                    |
| 3          | inflammatory_variables__3                                                              | Normal WBC count with greater than 10% immature forms                                                                                   |                                                                                                                                                                                                                                                                                                                                                                                                                                                                                                                                                                                                                                                                                                                                                                                                                                                                                                                                                                                                                                                                                                                                                                                                                                                                                                                                                                                                                                                                                                                                                  |   |                           |                                                                                                                                         |                   |                           |                                                                                                      |   |                           |                                                       |                        |                           |                                                                   |   |                           |                                                              |       |                   |                                                  |   |                   |                                                                    |
| 4          | inflammatory_variables__4                                                              | Plasma C-reactive protein more than two sd above the normal value                                                                       |                                                                                                                                                                                                                                                                                                                                                                                                                                                                                                                                                                                                                                                                                                                                                                                                                                                                                                                                                                                                                                                                                                                                                                                                                                                                                                                                                                                                                                                                                                                                                  |   |                           |                                                                                                                                         |                   |                           |                                                                                                      |   |                           |                                                       |                        |                           |                                                                   |   |                           |                                                              |       |                   |                                                  |   |                   |                                                                    |
| 5          | inflammatory_variables__5                                                              | Plasma procalcitonin more than two sd above the normal value                                                                            |                                                                                                                                                                                                                                                                                                                                                                                                                                                                                                                                                                                                                                                                                                                                                                                                                                                                                                                                                                                                                                                                                                                                                                                                                                                                                                                                                                                                                                                                                                                                                  |   |                           |                                                                                                                                         |                   |                           |                                                                                                      |   |                           |                                                       |                        |                           |                                                                   |   |                           |                                                              |       |                   |                                                  |   |                   |                                                                    |
| <p>639</p> | <p>hemodynamic<br/>Show the field ONLY if:<br/>[sepsis_suspicion] = '1'</p>            | <p>Hemodynamic variables</p>                                                                                                            | <p>checkbox</p> <table border="1"> <tr> <td data-bbox="1040 508 1062 535">1</td> <td data-bbox="1062 508 1230 535">hemodynamic__1</td> <td data-bbox="1230 508 1521 535">Arterial hypotension (SBP &lt; 90 mm Hg, MAP &lt; 70 mm Hg, or an SBP decrease &gt; 40 mm Hg in adults or less than two sd below normal for age)</td> </tr> </table>                                                                                                                                                                                                                                                                                                                                                                                                                                                                                                                                                                                                                                                                                                                                                                                                                                                                                                                                                                                                                                                                                                                                                                                                    | 1 | hemodynamic__1            | Arterial hypotension (SBP < 90 mm Hg, MAP < 70 mm Hg, or an SBP decrease > 40 mm Hg in adults or less than two sd below normal for age) |                   |                           |                                                                                                      |   |                           |                                                       |                        |                           |                                                                   |   |                           |                                                              |       |                   |                                                  |   |                   |                                                                    |
| 1          | hemodynamic__1                                                                         | Arterial hypotension (SBP < 90 mm Hg, MAP < 70 mm Hg, or an SBP decrease > 40 mm Hg in adults or less than two sd below normal for age) |                                                                                                                                                                                                                                                                                                                                                                                                                                                                                                                                                                                                                                                                                                                                                                                                                                                                                                                                                                                                                                                                                                                                                                                                                                                                                                                                                                                                                                                                                                                                                  |   |                           |                                                                                                                                         |                   |                           |                                                                                                      |   |                           |                                                       |                        |                           |                                                                   |   |                           |                                                              |       |                   |                                                  |   |                   |                                                                    |
| <p>640</p> | <p>organ_dysfunct<br/>Show the field ONLY if:<br/>[sepsis_suspicion] = '1'</p>         | <p>Organ dysfunction variables</p>                                                                                                      | <p>checkbox</p> <table border="1"> <tr> <td data-bbox="1040 676 1062 703">1</td> <td data-bbox="1062 676 1230 703">organ_dysfunct__1</td> <td data-bbox="1230 676 1521 703">Arterial hypoxemia (Pao2/Fio2 &lt; 300)</td> </tr> <tr> <td data-bbox="1040 732 1062 760">2</td> <td data-bbox="1062 732 1230 760">organ_dysfunct__2</td> <td data-bbox="1230 732 1521 760">Acute oliguria (urine output &lt; 0.5 mL/kg/hr for at least 2 hrs despite adequate fluid resuscitation)</td> </tr> <tr> <td data-bbox="1040 789 1062 816">3</td> <td data-bbox="1062 789 1230 816">organ_dysfunct__3</td> <td data-bbox="1230 789 1521 816">Creatinine increase &gt; 0.5 mg/dL or 44.2 ?mol/L</td> </tr> <tr> <td data-bbox="1040 846 1062 873">4</td> <td data-bbox="1062 846 1230 873">organ_dysfunct__4</td> <td data-bbox="1230 846 1521 873">Coagulation abnormalities (INR &gt; 1.5 or aPTT &gt; 60 s)</td> </tr> <tr> <td data-bbox="1040 903 1062 930">5</td> <td data-bbox="1062 903 1230 930">organ_dysfunct__5</td> <td data-bbox="1230 903 1521 930">Ileus (absent bowel sounds)</td> </tr> <tr> <td data-bbox="1040 959 1062 987">6</td> <td data-bbox="1062 959 1230 987">organ_dysfunct__6</td> <td data-bbox="1230 959 1521 987">Thrombocytopenia (platelet count &lt; 100,000 ?L-1)</td> </tr> <tr> <td data-bbox="1040 1016 1062 1043">7</td> <td data-bbox="1062 1016 1230 1043">organ_dysfunct__7</td> <td data-bbox="1230 1016 1521 1043">Hyperbilirubinemia (plasma total bilirubin &gt; 4 mg/dL or 70 ?mol/L)</td> </tr> </table> | 1 | organ_dysfunct__1         | Arterial hypoxemia (Pao2/Fio2 < 300)                                                                                                    | 2                 | organ_dysfunct__2         | Acute oliguria (urine output < 0.5 mL/kg/hr for at least 2 hrs despite adequate fluid resuscitation) | 3 | organ_dysfunct__3         | Creatinine increase > 0.5 mg/dL or 44.2 ?mol/L        | 4                      | organ_dysfunct__4         | Coagulation abnormalities (INR > 1.5 or aPTT > 60 s)              | 5 | organ_dysfunct__5         | Ileus (absent bowel sounds)                                  | 6     | organ_dysfunct__6 | Thrombocytopenia (platelet count < 100,000 ?L-1) | 7 | organ_dysfunct__7 | Hyperbilirubinemia (plasma total bilirubin > 4 mg/dL or 70 ?mol/L) |
| 1          | organ_dysfunct__1                                                                      | Arterial hypoxemia (Pao2/Fio2 < 300)                                                                                                    |                                                                                                                                                                                                                                                                                                                                                                                                                                                                                                                                                                                                                                                                                                                                                                                                                                                                                                                                                                                                                                                                                                                                                                                                                                                                                                                                                                                                                                                                                                                                                  |   |                           |                                                                                                                                         |                   |                           |                                                                                                      |   |                           |                                                       |                        |                           |                                                                   |   |                           |                                                              |       |                   |                                                  |   |                   |                                                                    |
| 2          | organ_dysfunct__2                                                                      | Acute oliguria (urine output < 0.5 mL/kg/hr for at least 2 hrs despite adequate fluid resuscitation)                                    |                                                                                                                                                                                                                                                                                                                                                                                                                                                                                                                                                                                                                                                                                                                                                                                                                                                                                                                                                                                                                                                                                                                                                                                                                                                                                                                                                                                                                                                                                                                                                  |   |                           |                                                                                                                                         |                   |                           |                                                                                                      |   |                           |                                                       |                        |                           |                                                                   |   |                           |                                                              |       |                   |                                                  |   |                   |                                                                    |
| 3          | organ_dysfunct__3                                                                      | Creatinine increase > 0.5 mg/dL or 44.2 ?mol/L                                                                                          |                                                                                                                                                                                                                                                                                                                                                                                                                                                                                                                                                                                                                                                                                                                                                                                                                                                                                                                                                                                                                                                                                                                                                                                                                                                                                                                                                                                                                                                                                                                                                  |   |                           |                                                                                                                                         |                   |                           |                                                                                                      |   |                           |                                                       |                        |                           |                                                                   |   |                           |                                                              |       |                   |                                                  |   |                   |                                                                    |
| 4          | organ_dysfunct__4                                                                      | Coagulation abnormalities (INR > 1.5 or aPTT > 60 s)                                                                                    |                                                                                                                                                                                                                                                                                                                                                                                                                                                                                                                                                                                                                                                                                                                                                                                                                                                                                                                                                                                                                                                                                                                                                                                                                                                                                                                                                                                                                                                                                                                                                  |   |                           |                                                                                                                                         |                   |                           |                                                                                                      |   |                           |                                                       |                        |                           |                                                                   |   |                           |                                                              |       |                   |                                                  |   |                   |                                                                    |
| 5          | organ_dysfunct__5                                                                      | Ileus (absent bowel sounds)                                                                                                             |                                                                                                                                                                                                                                                                                                                                                                                                                                                                                                                                                                                                                                                                                                                                                                                                                                                                                                                                                                                                                                                                                                                                                                                                                                                                                                                                                                                                                                                                                                                                                  |   |                           |                                                                                                                                         |                   |                           |                                                                                                      |   |                           |                                                       |                        |                           |                                                                   |   |                           |                                                              |       |                   |                                                  |   |                   |                                                                    |
| 6          | organ_dysfunct__6                                                                      | Thrombocytopenia (platelet count < 100,000 ?L-1)                                                                                        |                                                                                                                                                                                                                                                                                                                                                                                                                                                                                                                                                                                                                                                                                                                                                                                                                                                                                                                                                                                                                                                                                                                                                                                                                                                                                                                                                                                                                                                                                                                                                  |   |                           |                                                                                                                                         |                   |                           |                                                                                                      |   |                           |                                                       |                        |                           |                                                                   |   |                           |                                                              |       |                   |                                                  |   |                   |                                                                    |
| 7          | organ_dysfunct__7                                                                      | Hyperbilirubinemia (plasma total bilirubin > 4 mg/dL or 70 ?mol/L)                                                                      |                                                                                                                                                                                                                                                                                                                                                                                                                                                                                                                                                                                                                                                                                                                                                                                                                                                                                                                                                                                                                                                                                                                                                                                                                                                                                                                                                                                                                                                                                                                                                  |   |                           |                                                                                                                                         |                   |                           |                                                                                                      |   |                           |                                                       |                        |                           |                                                                   |   |                           |                                                              |       |                   |                                                  |   |                   |                                                                    |
| <p>641</p> | <p>infection_site<br/>Show the field ONLY if:<br/>[sepsis_suspicion] = '1'</p>         | <p>Suspected Infection site</p>                                                                                                         | <p>dropdown</p> <table border="1"> <tr><td data-bbox="1040 1129 1062 1157">1</td><td data-bbox="1062 1129 1252 1157">Skin</td></tr> <tr><td data-bbox="1040 1167 1062 1194">2</td><td data-bbox="1062 1167 1252 1194">Respiratory tract</td></tr> <tr><td data-bbox="1040 1205 1062 1232">3</td><td data-bbox="1062 1205 1252 1232">Neurologic</td></tr> <tr><td data-bbox="1040 1243 1062 1270">4</td><td data-bbox="1062 1243 1252 1270">Genitourinary</td></tr> <tr><td data-bbox="1040 1281 1062 1308">5</td><td data-bbox="1062 1281 1252 1308">Gastrointestinal tract</td></tr> <tr><td data-bbox="1040 1318 1062 1346">6</td><td data-bbox="1062 1318 1252 1346">Endocarditis</td></tr> <tr><td data-bbox="1040 1356 1062 1383">7</td><td data-bbox="1062 1356 1252 1383">Unknown</td></tr> </table>                                                                                                                                                                                                                                                                                                                                                                                                                                                                                                                                                                                                                                                                                                                                      | 1 | Skin                      | 2                                                                                                                                       | Respiratory tract | 3                         | Neurologic                                                                                           | 4 | Genitourinary             | 5                                                     | Gastrointestinal tract | 6                         | Endocarditis                                                      | 7 | Unknown                   |                                                              |       |                   |                                                  |   |                   |                                                                    |
| 1          | Skin                                                                                   |                                                                                                                                         |                                                                                                                                                                                                                                                                                                                                                                                                                                                                                                                                                                                                                                                                                                                                                                                                                                                                                                                                                                                                                                                                                                                                                                                                                                                                                                                                                                                                                                                                                                                                                  |   |                           |                                                                                                                                         |                   |                           |                                                                                                      |   |                           |                                                       |                        |                           |                                                                   |   |                           |                                                              |       |                   |                                                  |   |                   |                                                                    |
| 2          | Respiratory tract                                                                      |                                                                                                                                         |                                                                                                                                                                                                                                                                                                                                                                                                                                                                                                                                                                                                                                                                                                                                                                                                                                                                                                                                                                                                                                                                                                                                                                                                                                                                                                                                                                                                                                                                                                                                                  |   |                           |                                                                                                                                         |                   |                           |                                                                                                      |   |                           |                                                       |                        |                           |                                                                   |   |                           |                                                              |       |                   |                                                  |   |                   |                                                                    |
| 3          | Neurologic                                                                             |                                                                                                                                         |                                                                                                                                                                                                                                                                                                                                                                                                                                                                                                                                                                                                                                                                                                                                                                                                                                                                                                                                                                                                                                                                                                                                                                                                                                                                                                                                                                                                                                                                                                                                                  |   |                           |                                                                                                                                         |                   |                           |                                                                                                      |   |                           |                                                       |                        |                           |                                                                   |   |                           |                                                              |       |                   |                                                  |   |                   |                                                                    |
| 4          | Genitourinary                                                                          |                                                                                                                                         |                                                                                                                                                                                                                                                                                                                                                                                                                                                                                                                                                                                                                                                                                                                                                                                                                                                                                                                                                                                                                                                                                                                                                                                                                                                                                                                                                                                                                                                                                                                                                  |   |                           |                                                                                                                                         |                   |                           |                                                                                                      |   |                           |                                                       |                        |                           |                                                                   |   |                           |                                                              |       |                   |                                                  |   |                   |                                                                    |
| 5          | Gastrointestinal tract                                                                 |                                                                                                                                         |                                                                                                                                                                                                                                                                                                                                                                                                                                                                                                                                                                                                                                                                                                                                                                                                                                                                                                                                                                                                                                                                                                                                                                                                                                                                                                                                                                                                                                                                                                                                                  |   |                           |                                                                                                                                         |                   |                           |                                                                                                      |   |                           |                                                       |                        |                           |                                                                   |   |                           |                                                              |       |                   |                                                  |   |                   |                                                                    |
| 6          | Endocarditis                                                                           |                                                                                                                                         |                                                                                                                                                                                                                                                                                                                                                                                                                                                                                                                                                                                                                                                                                                                                                                                                                                                                                                                                                                                                                                                                                                                                                                                                                                                                                                                                                                                                                                                                                                                                                  |   |                           |                                                                                                                                         |                   |                           |                                                                                                      |   |                           |                                                       |                        |                           |                                                                   |   |                           |                                                              |       |                   |                                                  |   |                   |                                                                    |
| 7          | Unknown                                                                                |                                                                                                                                         |                                                                                                                                                                                                                                                                                                                                                                                                                                                                                                                                                                                                                                                                                                                                                                                                                                                                                                                                                                                                                                                                                                                                                                                                                                                                                                                                                                                                                                                                                                                                                  |   |                           |                                                                                                                                         |                   |                           |                                                                                                      |   |                           |                                                       |                        |                           |                                                                   |   |                           |                                                              |       |                   |                                                  |   |                   |                                                                    |
| <p>642</p> | <p>tissue_perfusion<br/>Show the field ONLY if:<br/>[sepsis_suspicion] = '1'</p>       | <p>Tissue perfusion variables</p>                                                                                                       | <p>checkbox</p> <table border="1"> <tr> <td data-bbox="1040 1417 1062 1444">1</td> <td data-bbox="1062 1417 1247 1444">tissue_perfusion__1</td> <td data-bbox="1247 1417 1521 1444">Hyperlactatemia (&gt; 1 mmol/L)</td> </tr> <tr> <td data-bbox="1040 1455 1062 1482">2</td> <td data-bbox="1062 1455 1247 1482">tissue_perfusion__2</td> <td data-bbox="1247 1455 1521 1482">Decreased capillary refill or mottling</td> </tr> </table>                                                                                                                                                                                                                                                                                                                                                                                                                                                                                                                                                                                                                                                                                                                                                                                                                                                                                                                                                                                                                                                                                                       | 1 | tissue_perfusion__1       | Hyperlactatemia (> 1 mmol/L)                                                                                                            | 2                 | tissue_perfusion__2       | Decreased capillary refill or mottling                                                               |   |                           |                                                       |                        |                           |                                                                   |   |                           |                                                              |       |                   |                                                  |   |                   |                                                                    |
| 1          | tissue_perfusion__1                                                                    | Hyperlactatemia (> 1 mmol/L)                                                                                                            |                                                                                                                                                                                                                                                                                                                                                                                                                                                                                                                                                                                                                                                                                                                                                                                                                                                                                                                                                                                                                                                                                                                                                                                                                                                                                                                                                                                                                                                                                                                                                  |   |                           |                                                                                                                                         |                   |                           |                                                                                                      |   |                           |                                                       |                        |                           |                                                                   |   |                           |                                                              |       |                   |                                                  |   |                   |                                                                    |
| 2          | tissue_perfusion__2                                                                    | Decreased capillary refill or mottling                                                                                                  |                                                                                                                                                                                                                                                                                                                                                                                                                                                                                                                                                                                                                                                                                                                                                                                                                                                                                                                                                                                                                                                                                                                                                                                                                                                                                                                                                                                                                                                                                                                                                  |   |                           |                                                                                                                                         |                   |                           |                                                                                                      |   |                           |                                                       |                        |                           |                                                                   |   |                           |                                                              |       |                   |                                                  |   |                   |                                                                    |
| <p>643</p> | <p>culture</p>                                                                         | <p>Positive culture?</p>                                                                                                                | <p>dropdown</p> <table border="1"> <tr><td data-bbox="1040 1549 1062 1577">0</td><td data-bbox="1062 1549 1219 1577">No</td></tr> <tr><td data-bbox="1040 1587 1062 1614">1</td><td data-bbox="1062 1587 1219 1614">Blood</td></tr> <tr><td data-bbox="1040 1625 1062 1652">2</td><td data-bbox="1062 1625 1219 1652">Urine</td></tr> <tr><td data-bbox="1040 1663 1062 1690">3</td><td data-bbox="1062 1663 1219 1690">Respiratory tract</td></tr> <tr><td data-bbox="1040 1701 1062 1728">4</td><td data-bbox="1062 1701 1219 1728">Pleura</td></tr> <tr><td data-bbox="1040 1738 1062 1766">5</td><td data-bbox="1062 1738 1219 1766">Peritoneal</td></tr> <tr><td data-bbox="1040 1776 1062 1803">6</td><td data-bbox="1062 1776 1219 1803">Skin</td></tr> <tr><td data-bbox="1040 1814 1062 1841">7</td><td data-bbox="1062 1814 1219 1841">Stool</td></tr> <tr><td data-bbox="1040 1852 1062 1879">8</td><td data-bbox="1062 1852 1219 1879">CSF</td></tr> <tr><td data-bbox="1040 1890 1062 1917">9</td><td data-bbox="1062 1890 1219 1917">Gynecologic tract</td></tr> </table>                                                                                                                                                                                                                                                                                                                                                                                                                                                          | 0 | No                        | 1                                                                                                                                       | Blood             | 2                         | Urine                                                                                                | 3 | Respiratory tract         | 4                                                     | Pleura                 | 5                         | Peritoneal                                                        | 6 | Skin                      | 7                                                            | Stool | 8                 | CSF                                              | 9 | Gynecologic tract |                                                                    |
| 0          | No                                                                                     |                                                                                                                                         |                                                                                                                                                                                                                                                                                                                                                                                                                                                                                                                                                                                                                                                                                                                                                                                                                                                                                                                                                                                                                                                                                                                                                                                                                                                                                                                                                                                                                                                                                                                                                  |   |                           |                                                                                                                                         |                   |                           |                                                                                                      |   |                           |                                                       |                        |                           |                                                                   |   |                           |                                                              |       |                   |                                                  |   |                   |                                                                    |
| 1          | Blood                                                                                  |                                                                                                                                         |                                                                                                                                                                                                                                                                                                                                                                                                                                                                                                                                                                                                                                                                                                                                                                                                                                                                                                                                                                                                                                                                                                                                                                                                                                                                                                                                                                                                                                                                                                                                                  |   |                           |                                                                                                                                         |                   |                           |                                                                                                      |   |                           |                                                       |                        |                           |                                                                   |   |                           |                                                              |       |                   |                                                  |   |                   |                                                                    |
| 2          | Urine                                                                                  |                                                                                                                                         |                                                                                                                                                                                                                                                                                                                                                                                                                                                                                                                                                                                                                                                                                                                                                                                                                                                                                                                                                                                                                                                                                                                                                                                                                                                                                                                                                                                                                                                                                                                                                  |   |                           |                                                                                                                                         |                   |                           |                                                                                                      |   |                           |                                                       |                        |                           |                                                                   |   |                           |                                                              |       |                   |                                                  |   |                   |                                                                    |
| 3          | Respiratory tract                                                                      |                                                                                                                                         |                                                                                                                                                                                                                                                                                                                                                                                                                                                                                                                                                                                                                                                                                                                                                                                                                                                                                                                                                                                                                                                                                                                                                                                                                                                                                                                                                                                                                                                                                                                                                  |   |                           |                                                                                                                                         |                   |                           |                                                                                                      |   |                           |                                                       |                        |                           |                                                                   |   |                           |                                                              |       |                   |                                                  |   |                   |                                                                    |
| 4          | Pleura                                                                                 |                                                                                                                                         |                                                                                                                                                                                                                                                                                                                                                                                                                                                                                                                                                                                                                                                                                                                                                                                                                                                                                                                                                                                                                                                                                                                                                                                                                                                                                                                                                                                                                                                                                                                                                  |   |                           |                                                                                                                                         |                   |                           |                                                                                                      |   |                           |                                                       |                        |                           |                                                                   |   |                           |                                                              |       |                   |                                                  |   |                   |                                                                    |
| 5          | Peritoneal                                                                             |                                                                                                                                         |                                                                                                                                                                                                                                                                                                                                                                                                                                                                                                                                                                                                                                                                                                                                                                                                                                                                                                                                                                                                                                                                                                                                                                                                                                                                                                                                                                                                                                                                                                                                                  |   |                           |                                                                                                                                         |                   |                           |                                                                                                      |   |                           |                                                       |                        |                           |                                                                   |   |                           |                                                              |       |                   |                                                  |   |                   |                                                                    |
| 6          | Skin                                                                                   |                                                                                                                                         |                                                                                                                                                                                                                                                                                                                                                                                                                                                                                                                                                                                                                                                                                                                                                                                                                                                                                                                                                                                                                                                                                                                                                                                                                                                                                                                                                                                                                                                                                                                                                  |   |                           |                                                                                                                                         |                   |                           |                                                                                                      |   |                           |                                                       |                        |                           |                                                                   |   |                           |                                                              |       |                   |                                                  |   |                   |                                                                    |
| 7          | Stool                                                                                  |                                                                                                                                         |                                                                                                                                                                                                                                                                                                                                                                                                                                                                                                                                                                                                                                                                                                                                                                                                                                                                                                                                                                                                                                                                                                                                                                                                                                                                                                                                                                                                                                                                                                                                                  |   |                           |                                                                                                                                         |                   |                           |                                                                                                      |   |                           |                                                       |                        |                           |                                                                   |   |                           |                                                              |       |                   |                                                  |   |                   |                                                                    |
| 8          | CSF                                                                                    |                                                                                                                                         |                                                                                                                                                                                                                                                                                                                                                                                                                                                                                                                                                                                                                                                                                                                                                                                                                                                                                                                                                                                                                                                                                                                                                                                                                                                                                                                                                                                                                                                                                                                                                  |   |                           |                                                                                                                                         |                   |                           |                                                                                                      |   |                           |                                                       |                        |                           |                                                                   |   |                           |                                                              |       |                   |                                                  |   |                   |                                                                    |
| 9          | Gynecologic tract                                                                      |                                                                                                                                         |                                                                                                                                                                                                                                                                                                                                                                                                                                                                                                                                                                                                                                                                                                                                                                                                                                                                                                                                                                                                                                                                                                                                                                                                                                                                                                                                                                                                                                                                                                                                                  |   |                           |                                                                                                                                         |                   |                           |                                                                                                      |   |                           |                                                       |                        |                           |                                                                   |   |                           |                                                              |       |                   |                                                  |   |                   |                                                                    |



|     |                                                                                                                                                                                                                                                 |                        |                                                                                                                                                                                                                                                                                                                                                                                                                                                                                                                                                                                                                                                                                                                                                                                                                                                                                                                        |   |                              |   |                              |   |                              |   |                            |   |                                    |   |                          |   |                        |   |                         |   |                        |    |                               |    |                      |    |                     |    |                    |    |                  |    |                                       |    |                  |    |                             |
|-----|-------------------------------------------------------------------------------------------------------------------------------------------------------------------------------------------------------------------------------------------------|------------------------|------------------------------------------------------------------------------------------------------------------------------------------------------------------------------------------------------------------------------------------------------------------------------------------------------------------------------------------------------------------------------------------------------------------------------------------------------------------------------------------------------------------------------------------------------------------------------------------------------------------------------------------------------------------------------------------------------------------------------------------------------------------------------------------------------------------------------------------------------------------------------------------------------------------------|---|------------------------------|---|------------------------------|---|------------------------------|---|----------------------------|---|------------------------------------|---|--------------------------|---|------------------------|---|-------------------------|---|------------------------|----|-------------------------------|----|----------------------|----|---------------------|----|--------------------|----|------------------|----|---------------------------------------|----|------------------|----|-----------------------------|
| 644 | <p>microorganism</p> <p>Show the field ONLY if:<br/>[culture] = '1' or [culture] = '2' or<br/>[culture] = '3' or [culture] = '4' or<br/>[culture] = '5' or [culture] = '6' or<br/>[culture] = '7' or [culture] = '8' or<br/>[culture] = '9'</p> | Microorganism isolated | <p>dropdown</p> <table border="1"> <tr><td>1</td><td>Gram positive bacteria</td></tr> <tr><td>2</td><td>Gram negative bacteria</td></tr> <tr><td>3</td><td>Anaerobic bacteria</td></tr> <tr><td>4</td><td>Mycobacteria</td></tr> <tr><td>5</td><td>Fungal</td></tr> <tr><td>6</td><td>Virus</td></tr> </table>                                                                                                                                                                                                                                                                                                                                                                                                                                                                                                                                                                                                         | 1 | Gram positive bacteria       | 2 | Gram negative bacteria       | 3 | Anaerobic bacteria           | 4 | Mycobacteria               | 5 | Fungal                             | 6 | Virus                    |   |                        |   |                         |   |                        |    |                               |    |                      |    |                     |    |                    |    |                  |    |                                       |    |                  |    |                             |
| 1   | Gram positive bacteria                                                                                                                                                                                                                          |                        |                                                                                                                                                                                                                                                                                                                                                                                                                                                                                                                                                                                                                                                                                                                                                                                                                                                                                                                        |   |                              |   |                              |   |                              |   |                            |   |                                    |   |                          |   |                        |   |                         |   |                        |    |                               |    |                      |    |                     |    |                    |    |                  |    |                                       |    |                  |    |                             |
| 2   | Gram negative bacteria                                                                                                                                                                                                                          |                        |                                                                                                                                                                                                                                                                                                                                                                                                                                                                                                                                                                                                                                                                                                                                                                                                                                                                                                                        |   |                              |   |                              |   |                              |   |                            |   |                                    |   |                          |   |                        |   |                         |   |                        |    |                               |    |                      |    |                     |    |                    |    |                  |    |                                       |    |                  |    |                             |
| 3   | Anaerobic bacteria                                                                                                                                                                                                                              |                        |                                                                                                                                                                                                                                                                                                                                                                                                                                                                                                                                                                                                                                                                                                                                                                                                                                                                                                                        |   |                              |   |                              |   |                              |   |                            |   |                                    |   |                          |   |                        |   |                         |   |                        |    |                               |    |                      |    |                     |    |                    |    |                  |    |                                       |    |                  |    |                             |
| 4   | Mycobacteria                                                                                                                                                                                                                                    |                        |                                                                                                                                                                                                                                                                                                                                                                                                                                                                                                                                                                                                                                                                                                                                                                                                                                                                                                                        |   |                              |   |                              |   |                              |   |                            |   |                                    |   |                          |   |                        |   |                         |   |                        |    |                               |    |                      |    |                     |    |                    |    |                  |    |                                       |    |                  |    |                             |
| 5   | Fungal                                                                                                                                                                                                                                          |                        |                                                                                                                                                                                                                                                                                                                                                                                                                                                                                                                                                                                                                                                                                                                                                                                                                                                                                                                        |   |                              |   |                              |   |                              |   |                            |   |                                    |   |                          |   |                        |   |                         |   |                        |    |                               |    |                      |    |                     |    |                    |    |                  |    |                                       |    |                  |    |                             |
| 6   | Virus                                                                                                                                                                                                                                           |                        |                                                                                                                                                                                                                                                                                                                                                                                                                                                                                                                                                                                                                                                                                                                                                                                                                                                                                                                        |   |                              |   |                              |   |                              |   |                            |   |                                    |   |                          |   |                        |   |                         |   |                        |    |                               |    |                      |    |                     |    |                    |    |                  |    |                                       |    |                  |    |                             |
| 645 | <p>gram_positive_bacteria</p> <p>Show the field ONLY if:<br/>[microorganism] = '1'</p>                                                                                                                                                          | Gram positive bacteria | <p>dropdown</p> <table border="1"> <tr><td>1</td><td>Staphylococcus aureus (MSSA)</td></tr> <tr><td>2</td><td>Staphylococcus aureus (MRSA)</td></tr> <tr><td>3</td><td>Staphylococcus aureus (VRSA)</td></tr> <tr><td>4</td><td>Staphylococcus epidermidis</td></tr> <tr><td>5</td><td>Other Staphylococcus coagulase neg</td></tr> <tr><td>6</td><td>Streptococcus pneumoniae</td></tr> <tr><td>7</td><td>Streptococcus pyogenes</td></tr> <tr><td>8</td><td>Streptococcus agalactie</td></tr> <tr><td>9</td><td>Streptococcus viridans</td></tr> <tr><td>10</td><td>Streptococcus, other specises</td></tr> <tr><td>11</td><td>Enterococcus species</td></tr> <tr><td>12</td><td>Other Gram positive</td></tr> </table>                                                                                                                                                                                              | 1 | Staphylococcus aureus (MSSA) | 2 | Staphylococcus aureus (MRSA) | 3 | Staphylococcus aureus (VRSA) | 4 | Staphylococcus epidermidis | 5 | Other Staphylococcus coagulase neg | 6 | Streptococcus pneumoniae | 7 | Streptococcus pyogenes | 8 | Streptococcus agalactie | 9 | Streptococcus viridans | 10 | Streptococcus, other specises | 11 | Enterococcus species | 12 | Other Gram positive |    |                    |    |                  |    |                                       |    |                  |    |                             |
| 1   | Staphylococcus aureus (MSSA)                                                                                                                                                                                                                    |                        |                                                                                                                                                                                                                                                                                                                                                                                                                                                                                                                                                                                                                                                                                                                                                                                                                                                                                                                        |   |                              |   |                              |   |                              |   |                            |   |                                    |   |                          |   |                        |   |                         |   |                        |    |                               |    |                      |    |                     |    |                    |    |                  |    |                                       |    |                  |    |                             |
| 2   | Staphylococcus aureus (MRSA)                                                                                                                                                                                                                    |                        |                                                                                                                                                                                                                                                                                                                                                                                                                                                                                                                                                                                                                                                                                                                                                                                                                                                                                                                        |   |                              |   |                              |   |                              |   |                            |   |                                    |   |                          |   |                        |   |                         |   |                        |    |                               |    |                      |    |                     |    |                    |    |                  |    |                                       |    |                  |    |                             |
| 3   | Staphylococcus aureus (VRSA)                                                                                                                                                                                                                    |                        |                                                                                                                                                                                                                                                                                                                                                                                                                                                                                                                                                                                                                                                                                                                                                                                                                                                                                                                        |   |                              |   |                              |   |                              |   |                            |   |                                    |   |                          |   |                        |   |                         |   |                        |    |                               |    |                      |    |                     |    |                    |    |                  |    |                                       |    |                  |    |                             |
| 4   | Staphylococcus epidermidis                                                                                                                                                                                                                      |                        |                                                                                                                                                                                                                                                                                                                                                                                                                                                                                                                                                                                                                                                                                                                                                                                                                                                                                                                        |   |                              |   |                              |   |                              |   |                            |   |                                    |   |                          |   |                        |   |                         |   |                        |    |                               |    |                      |    |                     |    |                    |    |                  |    |                                       |    |                  |    |                             |
| 5   | Other Staphylococcus coagulase neg                                                                                                                                                                                                              |                        |                                                                                                                                                                                                                                                                                                                                                                                                                                                                                                                                                                                                                                                                                                                                                                                                                                                                                                                        |   |                              |   |                              |   |                              |   |                            |   |                                    |   |                          |   |                        |   |                         |   |                        |    |                               |    |                      |    |                     |    |                    |    |                  |    |                                       |    |                  |    |                             |
| 6   | Streptococcus pneumoniae                                                                                                                                                                                                                        |                        |                                                                                                                                                                                                                                                                                                                                                                                                                                                                                                                                                                                                                                                                                                                                                                                                                                                                                                                        |   |                              |   |                              |   |                              |   |                            |   |                                    |   |                          |   |                        |   |                         |   |                        |    |                               |    |                      |    |                     |    |                    |    |                  |    |                                       |    |                  |    |                             |
| 7   | Streptococcus pyogenes                                                                                                                                                                                                                          |                        |                                                                                                                                                                                                                                                                                                                                                                                                                                                                                                                                                                                                                                                                                                                                                                                                                                                                                                                        |   |                              |   |                              |   |                              |   |                            |   |                                    |   |                          |   |                        |   |                         |   |                        |    |                               |    |                      |    |                     |    |                    |    |                  |    |                                       |    |                  |    |                             |
| 8   | Streptococcus agalactie                                                                                                                                                                                                                         |                        |                                                                                                                                                                                                                                                                                                                                                                                                                                                                                                                                                                                                                                                                                                                                                                                                                                                                                                                        |   |                              |   |                              |   |                              |   |                            |   |                                    |   |                          |   |                        |   |                         |   |                        |    |                               |    |                      |    |                     |    |                    |    |                  |    |                                       |    |                  |    |                             |
| 9   | Streptococcus viridans                                                                                                                                                                                                                          |                        |                                                                                                                                                                                                                                                                                                                                                                                                                                                                                                                                                                                                                                                                                                                                                                                                                                                                                                                        |   |                              |   |                              |   |                              |   |                            |   |                                    |   |                          |   |                        |   |                         |   |                        |    |                               |    |                      |    |                     |    |                    |    |                  |    |                                       |    |                  |    |                             |
| 10  | Streptococcus, other specises                                                                                                                                                                                                                   |                        |                                                                                                                                                                                                                                                                                                                                                                                                                                                                                                                                                                                                                                                                                                                                                                                                                                                                                                                        |   |                              |   |                              |   |                              |   |                            |   |                                    |   |                          |   |                        |   |                         |   |                        |    |                               |    |                      |    |                     |    |                    |    |                  |    |                                       |    |                  |    |                             |
| 11  | Enterococcus species                                                                                                                                                                                                                            |                        |                                                                                                                                                                                                                                                                                                                                                                                                                                                                                                                                                                                                                                                                                                                                                                                                                                                                                                                        |   |                              |   |                              |   |                              |   |                            |   |                                    |   |                          |   |                        |   |                         |   |                        |    |                               |    |                      |    |                     |    |                    |    |                  |    |                                       |    |                  |    |                             |
| 12  | Other Gram positive                                                                                                                                                                                                                             |                        |                                                                                                                                                                                                                                                                                                                                                                                                                                                                                                                                                                                                                                                                                                                                                                                                                                                                                                                        |   |                              |   |                              |   |                              |   |                            |   |                                    |   |                          |   |                        |   |                         |   |                        |    |                               |    |                      |    |                     |    |                    |    |                  |    |                                       |    |                  |    |                             |
| 646 | <p>gram_neg_bact</p> <p>Show the field ONLY if:<br/>[microorganism] = '2'</p>                                                                                                                                                                   | Gram negative bacteria | <p>dropdown</p> <table border="1"> <tr><td>1</td><td>Escherichia coli</td></tr> <tr><td>2</td><td>Pseudomonas species</td></tr> <tr><td>3</td><td>Hemophilus influenzae</td></tr> <tr><td>4</td><td>Klebsiella species</td></tr> <tr><td>5</td><td>Acinetobacter species</td></tr> <tr><td>6</td><td>Enterobacter species</td></tr> <tr><td>7</td><td>Legionella species</td></tr> <tr><td>8</td><td>Moraxella catarrhalis</td></tr> <tr><td>9</td><td>Morganella species</td></tr> <tr><td>10</td><td>Neisseria meningitides</td></tr> <tr><td>11</td><td>Proteus species</td></tr> <tr><td>12</td><td>Citrobacter species</td></tr> <tr><td>13</td><td>Salmonella species</td></tr> <tr><td>14</td><td>Serratia species</td></tr> <tr><td>15</td><td>Sternotrophomonas/Xanthomonas species</td></tr> <tr><td>16</td><td>Yersinia species</td></tr> <tr><td>17</td><td>Other Gram negative species</td></tr> </table> | 1 | Escherichia coli             | 2 | Pseudomonas species          | 3 | Hemophilus influenzae        | 4 | Klebsiella species         | 5 | Acinetobacter species              | 6 | Enterobacter species     | 7 | Legionella species     | 8 | Moraxella catarrhalis   | 9 | Morganella species     | 10 | Neisseria meningitides        | 11 | Proteus species      | 12 | Citrobacter species | 13 | Salmonella species | 14 | Serratia species | 15 | Sternotrophomonas/Xanthomonas species | 16 | Yersinia species | 17 | Other Gram negative species |
| 1   | Escherichia coli                                                                                                                                                                                                                                |                        |                                                                                                                                                                                                                                                                                                                                                                                                                                                                                                                                                                                                                                                                                                                                                                                                                                                                                                                        |   |                              |   |                              |   |                              |   |                            |   |                                    |   |                          |   |                        |   |                         |   |                        |    |                               |    |                      |    |                     |    |                    |    |                  |    |                                       |    |                  |    |                             |
| 2   | Pseudomonas species                                                                                                                                                                                                                             |                        |                                                                                                                                                                                                                                                                                                                                                                                                                                                                                                                                                                                                                                                                                                                                                                                                                                                                                                                        |   |                              |   |                              |   |                              |   |                            |   |                                    |   |                          |   |                        |   |                         |   |                        |    |                               |    |                      |    |                     |    |                    |    |                  |    |                                       |    |                  |    |                             |
| 3   | Hemophilus influenzae                                                                                                                                                                                                                           |                        |                                                                                                                                                                                                                                                                                                                                                                                                                                                                                                                                                                                                                                                                                                                                                                                                                                                                                                                        |   |                              |   |                              |   |                              |   |                            |   |                                    |   |                          |   |                        |   |                         |   |                        |    |                               |    |                      |    |                     |    |                    |    |                  |    |                                       |    |                  |    |                             |
| 4   | Klebsiella species                                                                                                                                                                                                                              |                        |                                                                                                                                                                                                                                                                                                                                                                                                                                                                                                                                                                                                                                                                                                                                                                                                                                                                                                                        |   |                              |   |                              |   |                              |   |                            |   |                                    |   |                          |   |                        |   |                         |   |                        |    |                               |    |                      |    |                     |    |                    |    |                  |    |                                       |    |                  |    |                             |
| 5   | Acinetobacter species                                                                                                                                                                                                                           |                        |                                                                                                                                                                                                                                                                                                                                                                                                                                                                                                                                                                                                                                                                                                                                                                                                                                                                                                                        |   |                              |   |                              |   |                              |   |                            |   |                                    |   |                          |   |                        |   |                         |   |                        |    |                               |    |                      |    |                     |    |                    |    |                  |    |                                       |    |                  |    |                             |
| 6   | Enterobacter species                                                                                                                                                                                                                            |                        |                                                                                                                                                                                                                                                                                                                                                                                                                                                                                                                                                                                                                                                                                                                                                                                                                                                                                                                        |   |                              |   |                              |   |                              |   |                            |   |                                    |   |                          |   |                        |   |                         |   |                        |    |                               |    |                      |    |                     |    |                    |    |                  |    |                                       |    |                  |    |                             |
| 7   | Legionella species                                                                                                                                                                                                                              |                        |                                                                                                                                                                                                                                                                                                                                                                                                                                                                                                                                                                                                                                                                                                                                                                                                                                                                                                                        |   |                              |   |                              |   |                              |   |                            |   |                                    |   |                          |   |                        |   |                         |   |                        |    |                               |    |                      |    |                     |    |                    |    |                  |    |                                       |    |                  |    |                             |
| 8   | Moraxella catarrhalis                                                                                                                                                                                                                           |                        |                                                                                                                                                                                                                                                                                                                                                                                                                                                                                                                                                                                                                                                                                                                                                                                                                                                                                                                        |   |                              |   |                              |   |                              |   |                            |   |                                    |   |                          |   |                        |   |                         |   |                        |    |                               |    |                      |    |                     |    |                    |    |                  |    |                                       |    |                  |    |                             |
| 9   | Morganella species                                                                                                                                                                                                                              |                        |                                                                                                                                                                                                                                                                                                                                                                                                                                                                                                                                                                                                                                                                                                                                                                                                                                                                                                                        |   |                              |   |                              |   |                              |   |                            |   |                                    |   |                          |   |                        |   |                         |   |                        |    |                               |    |                      |    |                     |    |                    |    |                  |    |                                       |    |                  |    |                             |
| 10  | Neisseria meningitides                                                                                                                                                                                                                          |                        |                                                                                                                                                                                                                                                                                                                                                                                                                                                                                                                                                                                                                                                                                                                                                                                                                                                                                                                        |   |                              |   |                              |   |                              |   |                            |   |                                    |   |                          |   |                        |   |                         |   |                        |    |                               |    |                      |    |                     |    |                    |    |                  |    |                                       |    |                  |    |                             |
| 11  | Proteus species                                                                                                                                                                                                                                 |                        |                                                                                                                                                                                                                                                                                                                                                                                                                                                                                                                                                                                                                                                                                                                                                                                                                                                                                                                        |   |                              |   |                              |   |                              |   |                            |   |                                    |   |                          |   |                        |   |                         |   |                        |    |                               |    |                      |    |                     |    |                    |    |                  |    |                                       |    |                  |    |                             |
| 12  | Citrobacter species                                                                                                                                                                                                                             |                        |                                                                                                                                                                                                                                                                                                                                                                                                                                                                                                                                                                                                                                                                                                                                                                                                                                                                                                                        |   |                              |   |                              |   |                              |   |                            |   |                                    |   |                          |   |                        |   |                         |   |                        |    |                               |    |                      |    |                     |    |                    |    |                  |    |                                       |    |                  |    |                             |
| 13  | Salmonella species                                                                                                                                                                                                                              |                        |                                                                                                                                                                                                                                                                                                                                                                                                                                                                                                                                                                                                                                                                                                                                                                                                                                                                                                                        |   |                              |   |                              |   |                              |   |                            |   |                                    |   |                          |   |                        |   |                         |   |                        |    |                               |    |                      |    |                     |    |                    |    |                  |    |                                       |    |                  |    |                             |
| 14  | Serratia species                                                                                                                                                                                                                                |                        |                                                                                                                                                                                                                                                                                                                                                                                                                                                                                                                                                                                                                                                                                                                                                                                                                                                                                                                        |   |                              |   |                              |   |                              |   |                            |   |                                    |   |                          |   |                        |   |                         |   |                        |    |                               |    |                      |    |                     |    |                    |    |                  |    |                                       |    |                  |    |                             |
| 15  | Sternotrophomonas/Xanthomonas species                                                                                                                                                                                                           |                        |                                                                                                                                                                                                                                                                                                                                                                                                                                                                                                                                                                                                                                                                                                                                                                                                                                                                                                                        |   |                              |   |                              |   |                              |   |                            |   |                                    |   |                          |   |                        |   |                         |   |                        |    |                               |    |                      |    |                     |    |                    |    |                  |    |                                       |    |                  |    |                             |
| 16  | Yersinia species                                                                                                                                                                                                                                |                        |                                                                                                                                                                                                                                                                                                                                                                                                                                                                                                                                                                                                                                                                                                                                                                                                                                                                                                                        |   |                              |   |                              |   |                              |   |                            |   |                                    |   |                          |   |                        |   |                         |   |                        |    |                               |    |                      |    |                     |    |                    |    |                  |    |                                       |    |                  |    |                             |
| 17  | Other Gram negative species                                                                                                                                                                                                                     |                        |                                                                                                                                                                                                                                                                                                                                                                                                                                                                                                                                                                                                                                                                                                                                                                                                                                                                                                                        |   |                              |   |                              |   |                              |   |                            |   |                                    |   |                          |   |                        |   |                         |   |                        |    |                               |    |                      |    |                     |    |                    |    |                  |    |                                       |    |                  |    |                             |
| 647 | <p>anaerobic</p> <p>Show the field ONLY if:<br/>[microorganism] = '3'</p>                                                                                                                                                                       | Anaerobic bacteria     | <p>dropdown</p> <table border="1"> <tr><td>1</td><td>Actinomyces species</td></tr> <tr><td>2</td><td>Bacteriodes species</td></tr> <tr><td>3</td><td>Clostridium difficile</td></tr> <tr><td>4</td><td>Clostridium, other species</td></tr> <tr><td>5</td><td>Peptostreptococcus species</td></tr> <tr><td>6</td><td>Other anaerobic bacteria</td></tr> </table>                                                                                                                                                                                                                                                                                                                                                                                                                                                                                                                                                       | 1 | Actinomyces species          | 2 | Bacteriodes species          | 3 | Clostridium difficile        | 4 | Clostridium, other species | 5 | Peptostreptococcus species         | 6 | Other anaerobic bacteria |   |                        |   |                         |   |                        |    |                               |    |                      |    |                     |    |                    |    |                  |    |                                       |    |                  |    |                             |
| 1   | Actinomyces species                                                                                                                                                                                                                             |                        |                                                                                                                                                                                                                                                                                                                                                                                                                                                                                                                                                                                                                                                                                                                                                                                                                                                                                                                        |   |                              |   |                              |   |                              |   |                            |   |                                    |   |                          |   |                        |   |                         |   |                        |    |                               |    |                      |    |                     |    |                    |    |                  |    |                                       |    |                  |    |                             |
| 2   | Bacteriodes species                                                                                                                                                                                                                             |                        |                                                                                                                                                                                                                                                                                                                                                                                                                                                                                                                                                                                                                                                                                                                                                                                                                                                                                                                        |   |                              |   |                              |   |                              |   |                            |   |                                    |   |                          |   |                        |   |                         |   |                        |    |                               |    |                      |    |                     |    |                    |    |                  |    |                                       |    |                  |    |                             |
| 3   | Clostridium difficile                                                                                                                                                                                                                           |                        |                                                                                                                                                                                                                                                                                                                                                                                                                                                                                                                                                                                                                                                                                                                                                                                                                                                                                                                        |   |                              |   |                              |   |                              |   |                            |   |                                    |   |                          |   |                        |   |                         |   |                        |    |                               |    |                      |    |                     |    |                    |    |                  |    |                                       |    |                  |    |                             |
| 4   | Clostridium, other species                                                                                                                                                                                                                      |                        |                                                                                                                                                                                                                                                                                                                                                                                                                                                                                                                                                                                                                                                                                                                                                                                                                                                                                                                        |   |                              |   |                              |   |                              |   |                            |   |                                    |   |                          |   |                        |   |                         |   |                        |    |                               |    |                      |    |                     |    |                    |    |                  |    |                                       |    |                  |    |                             |
| 5   | Peptostreptococcus species                                                                                                                                                                                                                      |                        |                                                                                                                                                                                                                                                                                                                                                                                                                                                                                                                                                                                                                                                                                                                                                                                                                                                                                                                        |   |                              |   |                              |   |                              |   |                            |   |                                    |   |                          |   |                        |   |                         |   |                        |    |                               |    |                      |    |                     |    |                    |    |                  |    |                                       |    |                  |    |                             |
| 6   | Other anaerobic bacteria                                                                                                                                                                                                                        |                        |                                                                                                                                                                                                                                                                                                                                                                                                                                                                                                                                                                                                                                                                                                                                                                                                                                                                                                                        |   |                              |   |                              |   |                              |   |                            |   |                                    |   |                          |   |                        |   |                         |   |                        |    |                               |    |                      |    |                     |    |                    |    |                  |    |                                       |    |                  |    |                             |
| 648 | <p>mycobacteria</p> <p>Show the field ONLY if:<br/>[microorganism] = '4'</p>                                                                                                                                                                    | Mycobacteria           | <p>dropdown</p> <table border="1"> <tr><td>1</td><td>Mycobacterium tuberculosis</td></tr> <tr><td>2</td><td>Mycobacteria, other</td></tr> </table>                                                                                                                                                                                                                                                                                                                                                                                                                                                                                                                                                                                                                                                                                                                                                                     | 1 | Mycobacterium tuberculosis   | 2 | Mycobacteria, other          |   |                              |   |                            |   |                                    |   |                          |   |                        |   |                         |   |                        |    |                               |    |                      |    |                     |    |                    |    |                  |    |                                       |    |                  |    |                             |
| 1   | Mycobacterium tuberculosis                                                                                                                                                                                                                      |                        |                                                                                                                                                                                                                                                                                                                                                                                                                                                                                                                                                                                                                                                                                                                                                                                                                                                                                                                        |   |                              |   |                              |   |                              |   |                            |   |                                    |   |                          |   |                        |   |                         |   |                        |    |                               |    |                      |    |                     |    |                    |    |                  |    |                                       |    |                  |    |                             |
| 2   | Mycobacteria, other                                                                                                                                                                                                                             |                        |                                                                                                                                                                                                                                                                                                                                                                                                                                                                                                                                                                                                                                                                                                                                                                                                                                                                                                                        |   |                              |   |                              |   |                              |   |                            |   |                                    |   |                          |   |                        |   |                         |   |                        |    |                               |    |                      |    |                     |    |                    |    |                  |    |                                       |    |                  |    |                             |

|            |                                                                                                                                                                                                                                                                                                                                  |                                  |                                                                                                                                                                                                                                                                                                                                                                                                                                                                                                                                                                                                                                                                                                                      |   |                        |               |                        |                        |                    |   |                        |           |                    |                        |               |   |                        |       |                      |                        |                        |    |                             |             |     |                        |                             |    |                        |    |             |
|------------|----------------------------------------------------------------------------------------------------------------------------------------------------------------------------------------------------------------------------------------------------------------------------------------------------------------------------------|----------------------------------|----------------------------------------------------------------------------------------------------------------------------------------------------------------------------------------------------------------------------------------------------------------------------------------------------------------------------------------------------------------------------------------------------------------------------------------------------------------------------------------------------------------------------------------------------------------------------------------------------------------------------------------------------------------------------------------------------------------------|---|------------------------|---------------|------------------------|------------------------|--------------------|---|------------------------|-----------|--------------------|------------------------|---------------|---|------------------------|-------|----------------------|------------------------|------------------------|----|-----------------------------|-------------|-----|------------------------|-----------------------------|----|------------------------|----|-------------|
| <p>649</p> | <p>fungal</p> <p>Show the field ONLY if:<br/>[microorganism] = '5'</p>                                                                                                                                                                                                                                                           | <p>Fungal</p>                    | <p>dropdown</p> <table border="1"> <tr><td>1</td><td>Candida species</td></tr> <tr><td>2</td><td>Aspergillus species</td></tr> <tr><td>3</td><td>Blastomyces</td></tr> <tr><td>4</td><td>Mucor species</td></tr> <tr><td>5</td><td>Torulopsis species</td></tr> <tr><td>6</td><td>Coccidiomyces</td></tr> <tr><td>7</td><td>Histoplasma</td></tr> <tr><td>8</td><td>Other fungal species</td></tr> </table>                                                                                                                                                                                                                                                                                                          | 1 | Candida species        | 2             | Aspergillus species    | 3                      | Blastomyces        | 4 | Mucor species          | 5         | Torulopsis species | 6                      | Coccidiomyces | 7 | Histoplasma            | 8     | Other fungal species |                        |                        |    |                             |             |     |                        |                             |    |                        |    |             |
| 1          | Candida species                                                                                                                                                                                                                                                                                                                  |                                  |                                                                                                                                                                                                                                                                                                                                                                                                                                                                                                                                                                                                                                                                                                                      |   |                        |               |                        |                        |                    |   |                        |           |                    |                        |               |   |                        |       |                      |                        |                        |    |                             |             |     |                        |                             |    |                        |    |             |
| 2          | Aspergillus species                                                                                                                                                                                                                                                                                                              |                                  |                                                                                                                                                                                                                                                                                                                                                                                                                                                                                                                                                                                                                                                                                                                      |   |                        |               |                        |                        |                    |   |                        |           |                    |                        |               |   |                        |       |                      |                        |                        |    |                             |             |     |                        |                             |    |                        |    |             |
| 3          | Blastomyces                                                                                                                                                                                                                                                                                                                      |                                  |                                                                                                                                                                                                                                                                                                                                                                                                                                                                                                                                                                                                                                                                                                                      |   |                        |               |                        |                        |                    |   |                        |           |                    |                        |               |   |                        |       |                      |                        |                        |    |                             |             |     |                        |                             |    |                        |    |             |
| 4          | Mucor species                                                                                                                                                                                                                                                                                                                    |                                  |                                                                                                                                                                                                                                                                                                                                                                                                                                                                                                                                                                                                                                                                                                                      |   |                        |               |                        |                        |                    |   |                        |           |                    |                        |               |   |                        |       |                      |                        |                        |    |                             |             |     |                        |                             |    |                        |    |             |
| 5          | Torulopsis species                                                                                                                                                                                                                                                                                                               |                                  |                                                                                                                                                                                                                                                                                                                                                                                                                                                                                                                                                                                                                                                                                                                      |   |                        |               |                        |                        |                    |   |                        |           |                    |                        |               |   |                        |       |                      |                        |                        |    |                             |             |     |                        |                             |    |                        |    |             |
| 6          | Coccidiomyces                                                                                                                                                                                                                                                                                                                    |                                  |                                                                                                                                                                                                                                                                                                                                                                                                                                                                                                                                                                                                                                                                                                                      |   |                        |               |                        |                        |                    |   |                        |           |                    |                        |               |   |                        |       |                      |                        |                        |    |                             |             |     |                        |                             |    |                        |    |             |
| 7          | Histoplasma                                                                                                                                                                                                                                                                                                                      |                                  |                                                                                                                                                                                                                                                                                                                                                                                                                                                                                                                                                                                                                                                                                                                      |   |                        |               |                        |                        |                    |   |                        |           |                    |                        |               |   |                        |       |                      |                        |                        |    |                             |             |     |                        |                             |    |                        |    |             |
| 8          | Other fungal species                                                                                                                                                                                                                                                                                                             |                                  |                                                                                                                                                                                                                                                                                                                                                                                                                                                                                                                                                                                                                                                                                                                      |   |                        |               |                        |                        |                    |   |                        |           |                    |                        |               |   |                        |       |                      |                        |                        |    |                             |             |     |                        |                             |    |                        |    |             |
| <p>650</p> | <p>virus</p> <p>Show the field ONLY if:<br/>[microorganism] = '6'</p>                                                                                                                                                                                                                                                            | <p>Virus</p>                     | <p>dropdown</p> <table border="1"> <tr><td>1</td><td>Adenovirus</td></tr> <tr><td>2</td><td>Cytomegalovirus</td></tr> <tr><td>3</td><td>Influenza A virus</td></tr> <tr><td>4</td><td>Influenza B virus</td></tr> <tr><td>5</td><td>HHV-1</td></tr> <tr><td>6</td><td>HHV-2</td></tr> <tr><td>7</td><td>Coronavirus</td></tr> <tr><td>8</td><td>Metapneumovirus</td></tr> <tr><td>9</td><td>Rhinovirus/Enterovirus</td></tr> <tr><td>10</td><td>Respiratory Syncytial virus</td></tr> <tr><td>11</td><td>EBV</td></tr> <tr><td>12</td><td>HHV-6</td></tr> <tr><td>13</td><td>VZV</td></tr> <tr><td>14</td><td>Other virus</td></tr> </table>                                                                         | 1 | Adenovirus             | 2             | Cytomegalovirus        | 3                      | Influenza A virus  | 4 | Influenza B virus      | 5         | HHV-1              | 6                      | HHV-2         | 7 | Coronavirus            | 8     | Metapneumovirus      | 9                      | Rhinovirus/Enterovirus | 10 | Respiratory Syncytial virus | 11          | EBV | 12                     | HHV-6                       | 13 | VZV                    | 14 | Other virus |
| 1          | Adenovirus                                                                                                                                                                                                                                                                                                                       |                                  |                                                                                                                                                                                                                                                                                                                                                                                                                                                                                                                                                                                                                                                                                                                      |   |                        |               |                        |                        |                    |   |                        |           |                    |                        |               |   |                        |       |                      |                        |                        |    |                             |             |     |                        |                             |    |                        |    |             |
| 2          | Cytomegalovirus                                                                                                                                                                                                                                                                                                                  |                                  |                                                                                                                                                                                                                                                                                                                                                                                                                                                                                                                                                                                                                                                                                                                      |   |                        |               |                        |                        |                    |   |                        |           |                    |                        |               |   |                        |       |                      |                        |                        |    |                             |             |     |                        |                             |    |                        |    |             |
| 3          | Influenza A virus                                                                                                                                                                                                                                                                                                                |                                  |                                                                                                                                                                                                                                                                                                                                                                                                                                                                                                                                                                                                                                                                                                                      |   |                        |               |                        |                        |                    |   |                        |           |                    |                        |               |   |                        |       |                      |                        |                        |    |                             |             |     |                        |                             |    |                        |    |             |
| 4          | Influenza B virus                                                                                                                                                                                                                                                                                                                |                                  |                                                                                                                                                                                                                                                                                                                                                                                                                                                                                                                                                                                                                                                                                                                      |   |                        |               |                        |                        |                    |   |                        |           |                    |                        |               |   |                        |       |                      |                        |                        |    |                             |             |     |                        |                             |    |                        |    |             |
| 5          | HHV-1                                                                                                                                                                                                                                                                                                                            |                                  |                                                                                                                                                                                                                                                                                                                                                                                                                                                                                                                                                                                                                                                                                                                      |   |                        |               |                        |                        |                    |   |                        |           |                    |                        |               |   |                        |       |                      |                        |                        |    |                             |             |     |                        |                             |    |                        |    |             |
| 6          | HHV-2                                                                                                                                                                                                                                                                                                                            |                                  |                                                                                                                                                                                                                                                                                                                                                                                                                                                                                                                                                                                                                                                                                                                      |   |                        |               |                        |                        |                    |   |                        |           |                    |                        |               |   |                        |       |                      |                        |                        |    |                             |             |     |                        |                             |    |                        |    |             |
| 7          | Coronavirus                                                                                                                                                                                                                                                                                                                      |                                  |                                                                                                                                                                                                                                                                                                                                                                                                                                                                                                                                                                                                                                                                                                                      |   |                        |               |                        |                        |                    |   |                        |           |                    |                        |               |   |                        |       |                      |                        |                        |    |                             |             |     |                        |                             |    |                        |    |             |
| 8          | Metapneumovirus                                                                                                                                                                                                                                                                                                                  |                                  |                                                                                                                                                                                                                                                                                                                                                                                                                                                                                                                                                                                                                                                                                                                      |   |                        |               |                        |                        |                    |   |                        |           |                    |                        |               |   |                        |       |                      |                        |                        |    |                             |             |     |                        |                             |    |                        |    |             |
| 9          | Rhinovirus/Enterovirus                                                                                                                                                                                                                                                                                                           |                                  |                                                                                                                                                                                                                                                                                                                                                                                                                                                                                                                                                                                                                                                                                                                      |   |                        |               |                        |                        |                    |   |                        |           |                    |                        |               |   |                        |       |                      |                        |                        |    |                             |             |     |                        |                             |    |                        |    |             |
| 10         | Respiratory Syncytial virus                                                                                                                                                                                                                                                                                                      |                                  |                                                                                                                                                                                                                                                                                                                                                                                                                                                                                                                                                                                                                                                                                                                      |   |                        |               |                        |                        |                    |   |                        |           |                    |                        |               |   |                        |       |                      |                        |                        |    |                             |             |     |                        |                             |    |                        |    |             |
| 11         | EBV                                                                                                                                                                                                                                                                                                                              |                                  |                                                                                                                                                                                                                                                                                                                                                                                                                                                                                                                                                                                                                                                                                                                      |   |                        |               |                        |                        |                    |   |                        |           |                    |                        |               |   |                        |       |                      |                        |                        |    |                             |             |     |                        |                             |    |                        |    |             |
| 12         | HHV-6                                                                                                                                                                                                                                                                                                                            |                                  |                                                                                                                                                                                                                                                                                                                                                                                                                                                                                                                                                                                                                                                                                                                      |   |                        |               |                        |                        |                    |   |                        |           |                    |                        |               |   |                        |       |                      |                        |                        |    |                             |             |     |                        |                             |    |                        |    |             |
| 13         | VZV                                                                                                                                                                                                                                                                                                                              |                                  |                                                                                                                                                                                                                                                                                                                                                                                                                                                                                                                                                                                                                                                                                                                      |   |                        |               |                        |                        |                    |   |                        |           |                    |                        |               |   |                        |       |                      |                        |                        |    |                             |             |     |                        |                             |    |                        |    |             |
| 14         | Other virus                                                                                                                                                                                                                                                                                                                      |                                  |                                                                                                                                                                                                                                                                                                                                                                                                                                                                                                                                                                                                                                                                                                                      |   |                        |               |                        |                        |                    |   |                        |           |                    |                        |               |   |                        |       |                      |                        |                        |    |                             |             |     |                        |                             |    |                        |    |             |
| <p>651</p> | <p>secondary_infection</p>                                                                                                                                                                                                                                                                                                       | <p>Secondary site infection?</p> | <p>checkbox</p> <table border="1"> <tr><td>1</td><td>secondary_infection__1</td><td>Genitourinary</td></tr> <tr><td>2</td><td>secondary_infection__2</td><td>Abdominal/GI</td></tr> <tr><td>3</td><td>secondary_infection__3</td><td>Pulmonary</td></tr> <tr><td>4</td><td>secondary_infection__4</td><td>Head/neck</td></tr> <tr><td>5</td><td>secondary_infection__5</td><td>Blood</td></tr> <tr><td>6</td><td>secondary_infection__6</td><td>Skin/soft-tissue/bone</td></tr> <tr><td>7</td><td>secondary_infection__7</td><td>Gynecologic</td></tr> <tr><td>8</td><td>secondary_infection__8</td><td>Source of infection Unclear</td></tr> <tr><td>9</td><td>secondary_infection__9</td><td>No</td></tr> </table> | 1 | secondary_infection__1 | Genitourinary | 2                      | secondary_infection__2 | Abdominal/GI       | 3 | secondary_infection__3 | Pulmonary | 4                  | secondary_infection__4 | Head/neck     | 5 | secondary_infection__5 | Blood | 6                    | secondary_infection__6 | Skin/soft-tissue/bone  | 7  | secondary_infection__7      | Gynecologic | 8   | secondary_infection__8 | Source of infection Unclear | 9  | secondary_infection__9 | No |             |
| 1          | secondary_infection__1                                                                                                                                                                                                                                                                                                           | Genitourinary                    |                                                                                                                                                                                                                                                                                                                                                                                                                                                                                                                                                                                                                                                                                                                      |   |                        |               |                        |                        |                    |   |                        |           |                    |                        |               |   |                        |       |                      |                        |                        |    |                             |             |     |                        |                             |    |                        |    |             |
| 2          | secondary_infection__2                                                                                                                                                                                                                                                                                                           | Abdominal/GI                     |                                                                                                                                                                                                                                                                                                                                                                                                                                                                                                                                                                                                                                                                                                                      |   |                        |               |                        |                        |                    |   |                        |           |                    |                        |               |   |                        |       |                      |                        |                        |    |                             |             |     |                        |                             |    |                        |    |             |
| 3          | secondary_infection__3                                                                                                                                                                                                                                                                                                           | Pulmonary                        |                                                                                                                                                                                                                                                                                                                                                                                                                                                                                                                                                                                                                                                                                                                      |   |                        |               |                        |                        |                    |   |                        |           |                    |                        |               |   |                        |       |                      |                        |                        |    |                             |             |     |                        |                             |    |                        |    |             |
| 4          | secondary_infection__4                                                                                                                                                                                                                                                                                                           | Head/neck                        |                                                                                                                                                                                                                                                                                                                                                                                                                                                                                                                                                                                                                                                                                                                      |   |                        |               |                        |                        |                    |   |                        |           |                    |                        |               |   |                        |       |                      |                        |                        |    |                             |             |     |                        |                             |    |                        |    |             |
| 5          | secondary_infection__5                                                                                                                                                                                                                                                                                                           | Blood                            |                                                                                                                                                                                                                                                                                                                                                                                                                                                                                                                                                                                                                                                                                                                      |   |                        |               |                        |                        |                    |   |                        |           |                    |                        |               |   |                        |       |                      |                        |                        |    |                             |             |     |                        |                             |    |                        |    |             |
| 6          | secondary_infection__6                                                                                                                                                                                                                                                                                                           | Skin/soft-tissue/bone            |                                                                                                                                                                                                                                                                                                                                                                                                                                                                                                                                                                                                                                                                                                                      |   |                        |               |                        |                        |                    |   |                        |           |                    |                        |               |   |                        |       |                      |                        |                        |    |                             |             |     |                        |                             |    |                        |    |             |
| 7          | secondary_infection__7                                                                                                                                                                                                                                                                                                           | Gynecologic                      |                                                                                                                                                                                                                                                                                                                                                                                                                                                                                                                                                                                                                                                                                                                      |   |                        |               |                        |                        |                    |   |                        |           |                    |                        |               |   |                        |       |                      |                        |                        |    |                             |             |     |                        |                             |    |                        |    |             |
| 8          | secondary_infection__8                                                                                                                                                                                                                                                                                                           | Source of infection Unclear      |                                                                                                                                                                                                                                                                                                                                                                                                                                                                                                                                                                                                                                                                                                                      |   |                        |               |                        |                        |                    |   |                        |           |                    |                        |               |   |                        |       |                      |                        |                        |    |                             |             |     |                        |                             |    |                        |    |             |
| 9          | secondary_infection__9                                                                                                                                                                                                                                                                                                           | No                               |                                                                                                                                                                                                                                                                                                                                                                                                                                                                                                                                                                                                                                                                                                                      |   |                        |               |                        |                        |                    |   |                        |           |                    |                        |               |   |                        |       |                      |                        |                        |    |                             |             |     |                        |                             |    |                        |    |             |
| <p>652</p> | <p>culture_2</p> <p>Show the field ONLY if:<br/>[secondary_infection(1)] = '1' or [secondary_infection(2)] = '1' or [secondary_infection(3)] = '1' or [secondary_infection(4)] = '1' or [secondary_infection(5)] = '1' or [secondary_infection(6)] = '1' or [secondary_infection(7)] = '1' or [secondary_infection(8)] = '1'</p> | <p>Positive culture?</p>         | <p>dropdown</p> <table border="1"> <tr><td>1</td><td>Yes</td></tr> <tr><td>0</td><td>No</td></tr> </table>                                                                                                                                                                                                                                                                                                                                                                                                                                                                                                                                                                                                           | 1 | Yes                    | 0             | No                     |                        |                    |   |                        |           |                    |                        |               |   |                        |       |                      |                        |                        |    |                             |             |     |                        |                             |    |                        |    |             |
| 1          | Yes                                                                                                                                                                                                                                                                                                                              |                                  |                                                                                                                                                                                                                                                                                                                                                                                                                                                                                                                                                                                                                                                                                                                      |   |                        |               |                        |                        |                    |   |                        |           |                    |                        |               |   |                        |       |                      |                        |                        |    |                             |             |     |                        |                             |    |                        |    |             |
| 0          | No                                                                                                                                                                                                                                                                                                                               |                                  |                                                                                                                                                                                                                                                                                                                                                                                                                                                                                                                                                                                                                                                                                                                      |   |                        |               |                        |                        |                    |   |                        |           |                    |                        |               |   |                        |       |                      |                        |                        |    |                             |             |     |                        |                             |    |                        |    |             |
| <p>653</p> | <p>microorganism2_ac8</p> <p>Show the field ONLY if:<br/>[culture_2] = '1'</p>                                                                                                                                                                                                                                                   | <p>Microorganism isolated</p>    | <p>dropdown</p> <table border="1"> <tr><td>1</td><td>Gram positive bacteria</td></tr> <tr><td>2</td><td>Gram negative bacteria</td></tr> <tr><td>3</td><td>Anaerobic bacteria</td></tr> <tr><td>4</td><td>Mycobacteria</td></tr> <tr><td>5</td><td>Fungal</td></tr> <tr><td>6</td><td>Virus</td></tr> </table>                                                                                                                                                                                                                                                                                                                                                                                                       | 1 | Gram positive bacteria | 2             | Gram negative bacteria | 3                      | Anaerobic bacteria | 4 | Mycobacteria           | 5         | Fungal             | 6                      | Virus         |   |                        |       |                      |                        |                        |    |                             |             |     |                        |                             |    |                        |    |             |
| 1          | Gram positive bacteria                                                                                                                                                                                                                                                                                                           |                                  |                                                                                                                                                                                                                                                                                                                                                                                                                                                                                                                                                                                                                                                                                                                      |   |                        |               |                        |                        |                    |   |                        |           |                    |                        |               |   |                        |       |                      |                        |                        |    |                             |             |     |                        |                             |    |                        |    |             |
| 2          | Gram negative bacteria                                                                                                                                                                                                                                                                                                           |                                  |                                                                                                                                                                                                                                                                                                                                                                                                                                                                                                                                                                                                                                                                                                                      |   |                        |               |                        |                        |                    |   |                        |           |                    |                        |               |   |                        |       |                      |                        |                        |    |                             |             |     |                        |                             |    |                        |    |             |
| 3          | Anaerobic bacteria                                                                                                                                                                                                                                                                                                               |                                  |                                                                                                                                                                                                                                                                                                                                                                                                                                                                                                                                                                                                                                                                                                                      |   |                        |               |                        |                        |                    |   |                        |           |                    |                        |               |   |                        |       |                      |                        |                        |    |                             |             |     |                        |                             |    |                        |    |             |
| 4          | Mycobacteria                                                                                                                                                                                                                                                                                                                     |                                  |                                                                                                                                                                                                                                                                                                                                                                                                                                                                                                                                                                                                                                                                                                                      |   |                        |               |                        |                        |                    |   |                        |           |                    |                        |               |   |                        |       |                      |                        |                        |    |                             |             |     |                        |                             |    |                        |    |             |
| 5          | Fungal                                                                                                                                                                                                                                                                                                                           |                                  |                                                                                                                                                                                                                                                                                                                                                                                                                                                                                                                                                                                                                                                                                                                      |   |                        |               |                        |                        |                    |   |                        |           |                    |                        |               |   |                        |       |                      |                        |                        |    |                             |             |     |                        |                             |    |                        |    |             |
| 6          | Virus                                                                                                                                                                                                                                                                                                                            |                                  |                                                                                                                                                                                                                                                                                                                                                                                                                                                                                                                                                                                                                                                                                                                      |   |                        |               |                        |                        |                    |   |                        |           |                    |                        |               |   |                        |       |                      |                        |                        |    |                             |             |     |                        |                             |    |                        |    |             |

|            |                                                                                                 |                               |                                                                                                                                                                                                                                                                                                                                                                                                                                                                                                                                                                                                                                                                                                                                                                                                                                                                                                                        |   |                              |   |                              |   |                              |   |                            |   |                                    |   |                          |   |                        |   |                         |   |                        |    |                               |    |                      |    |                     |    |                    |    |                  |    |                                       |    |                  |    |                             |
|------------|-------------------------------------------------------------------------------------------------|-------------------------------|------------------------------------------------------------------------------------------------------------------------------------------------------------------------------------------------------------------------------------------------------------------------------------------------------------------------------------------------------------------------------------------------------------------------------------------------------------------------------------------------------------------------------------------------------------------------------------------------------------------------------------------------------------------------------------------------------------------------------------------------------------------------------------------------------------------------------------------------------------------------------------------------------------------------|---|------------------------------|---|------------------------------|---|------------------------------|---|----------------------------|---|------------------------------------|---|--------------------------|---|------------------------|---|-------------------------|---|------------------------|----|-------------------------------|----|----------------------|----|---------------------|----|--------------------|----|------------------|----|---------------------------------------|----|------------------|----|-----------------------------|
| <p>654</p> | <p>gram_positive_bacteri2_6b6</p> <p>Show the field ONLY if:<br/>[microorganism2_ac8] = '1'</p> | <p>Gram positive bacteria</p> | <p>dropdown</p> <table border="1"> <tr><td>1</td><td>Staphylococcus aureus (MSSA)</td></tr> <tr><td>2</td><td>Staphylococcus aureus (MRSA)</td></tr> <tr><td>3</td><td>Staphylococcus aureus (VRSA)</td></tr> <tr><td>4</td><td>Staphylococcus epidermidis</td></tr> <tr><td>5</td><td>Other Staphylococcus coagulase neg</td></tr> <tr><td>6</td><td>Streptococcus pneumoniae</td></tr> <tr><td>7</td><td>Streptococcus pyogenes</td></tr> <tr><td>8</td><td>Streptococcus agalactie</td></tr> <tr><td>9</td><td>Streptococcus viridans</td></tr> <tr><td>10</td><td>Streptococcus, other specises</td></tr> <tr><td>11</td><td>Enterococcus species</td></tr> <tr><td>12</td><td>Other Gram positive</td></tr> </table>                                                                                                                                                                                              | 1 | Staphylococcus aureus (MSSA) | 2 | Staphylococcus aureus (MRSA) | 3 | Staphylococcus aureus (VRSA) | 4 | Staphylococcus epidermidis | 5 | Other Staphylococcus coagulase neg | 6 | Streptococcus pneumoniae | 7 | Streptococcus pyogenes | 8 | Streptococcus agalactie | 9 | Streptococcus viridans | 10 | Streptococcus, other specises | 11 | Enterococcus species | 12 | Other Gram positive |    |                    |    |                  |    |                                       |    |                  |    |                             |
| 1          | Staphylococcus aureus (MSSA)                                                                    |                               |                                                                                                                                                                                                                                                                                                                                                                                                                                                                                                                                                                                                                                                                                                                                                                                                                                                                                                                        |   |                              |   |                              |   |                              |   |                            |   |                                    |   |                          |   |                        |   |                         |   |                        |    |                               |    |                      |    |                     |    |                    |    |                  |    |                                       |    |                  |    |                             |
| 2          | Staphylococcus aureus (MRSA)                                                                    |                               |                                                                                                                                                                                                                                                                                                                                                                                                                                                                                                                                                                                                                                                                                                                                                                                                                                                                                                                        |   |                              |   |                              |   |                              |   |                            |   |                                    |   |                          |   |                        |   |                         |   |                        |    |                               |    |                      |    |                     |    |                    |    |                  |    |                                       |    |                  |    |                             |
| 3          | Staphylococcus aureus (VRSA)                                                                    |                               |                                                                                                                                                                                                                                                                                                                                                                                                                                                                                                                                                                                                                                                                                                                                                                                                                                                                                                                        |   |                              |   |                              |   |                              |   |                            |   |                                    |   |                          |   |                        |   |                         |   |                        |    |                               |    |                      |    |                     |    |                    |    |                  |    |                                       |    |                  |    |                             |
| 4          | Staphylococcus epidermidis                                                                      |                               |                                                                                                                                                                                                                                                                                                                                                                                                                                                                                                                                                                                                                                                                                                                                                                                                                                                                                                                        |   |                              |   |                              |   |                              |   |                            |   |                                    |   |                          |   |                        |   |                         |   |                        |    |                               |    |                      |    |                     |    |                    |    |                  |    |                                       |    |                  |    |                             |
| 5          | Other Staphylococcus coagulase neg                                                              |                               |                                                                                                                                                                                                                                                                                                                                                                                                                                                                                                                                                                                                                                                                                                                                                                                                                                                                                                                        |   |                              |   |                              |   |                              |   |                            |   |                                    |   |                          |   |                        |   |                         |   |                        |    |                               |    |                      |    |                     |    |                    |    |                  |    |                                       |    |                  |    |                             |
| 6          | Streptococcus pneumoniae                                                                        |                               |                                                                                                                                                                                                                                                                                                                                                                                                                                                                                                                                                                                                                                                                                                                                                                                                                                                                                                                        |   |                              |   |                              |   |                              |   |                            |   |                                    |   |                          |   |                        |   |                         |   |                        |    |                               |    |                      |    |                     |    |                    |    |                  |    |                                       |    |                  |    |                             |
| 7          | Streptococcus pyogenes                                                                          |                               |                                                                                                                                                                                                                                                                                                                                                                                                                                                                                                                                                                                                                                                                                                                                                                                                                                                                                                                        |   |                              |   |                              |   |                              |   |                            |   |                                    |   |                          |   |                        |   |                         |   |                        |    |                               |    |                      |    |                     |    |                    |    |                  |    |                                       |    |                  |    |                             |
| 8          | Streptococcus agalactie                                                                         |                               |                                                                                                                                                                                                                                                                                                                                                                                                                                                                                                                                                                                                                                                                                                                                                                                                                                                                                                                        |   |                              |   |                              |   |                              |   |                            |   |                                    |   |                          |   |                        |   |                         |   |                        |    |                               |    |                      |    |                     |    |                    |    |                  |    |                                       |    |                  |    |                             |
| 9          | Streptococcus viridans                                                                          |                               |                                                                                                                                                                                                                                                                                                                                                                                                                                                                                                                                                                                                                                                                                                                                                                                                                                                                                                                        |   |                              |   |                              |   |                              |   |                            |   |                                    |   |                          |   |                        |   |                         |   |                        |    |                               |    |                      |    |                     |    |                    |    |                  |    |                                       |    |                  |    |                             |
| 10         | Streptococcus, other specises                                                                   |                               |                                                                                                                                                                                                                                                                                                                                                                                                                                                                                                                                                                                                                                                                                                                                                                                                                                                                                                                        |   |                              |   |                              |   |                              |   |                            |   |                                    |   |                          |   |                        |   |                         |   |                        |    |                               |    |                      |    |                     |    |                    |    |                  |    |                                       |    |                  |    |                             |
| 11         | Enterococcus species                                                                            |                               |                                                                                                                                                                                                                                                                                                                                                                                                                                                                                                                                                                                                                                                                                                                                                                                                                                                                                                                        |   |                              |   |                              |   |                              |   |                            |   |                                    |   |                          |   |                        |   |                         |   |                        |    |                               |    |                      |    |                     |    |                    |    |                  |    |                                       |    |                  |    |                             |
| 12         | Other Gram positive                                                                             |                               |                                                                                                                                                                                                                                                                                                                                                                                                                                                                                                                                                                                                                                                                                                                                                                                                                                                                                                                        |   |                              |   |                              |   |                              |   |                            |   |                                    |   |                          |   |                        |   |                         |   |                        |    |                               |    |                      |    |                     |    |                    |    |                  |    |                                       |    |                  |    |                             |
| <p>655</p> | <p>gram_neg_bact2_702</p> <p>Show the field ONLY if:<br/>[microorganism2_ac8] = '2'</p>         | <p>Gram negative bacteria</p> | <p>dropdown</p> <table border="1"> <tr><td>1</td><td>Escherichia coli</td></tr> <tr><td>2</td><td>Pseudomonas species</td></tr> <tr><td>3</td><td>Hemophilus influenzae</td></tr> <tr><td>4</td><td>Klebsiella species</td></tr> <tr><td>5</td><td>Acinetobacter species</td></tr> <tr><td>6</td><td>Enterobacter species</td></tr> <tr><td>7</td><td>Legionella species</td></tr> <tr><td>8</td><td>Moraxella catarrhalis</td></tr> <tr><td>9</td><td>Morganella species</td></tr> <tr><td>10</td><td>Neisseria meningitides</td></tr> <tr><td>11</td><td>Proteus species</td></tr> <tr><td>12</td><td>Citrobacter species</td></tr> <tr><td>13</td><td>Salmonella species</td></tr> <tr><td>14</td><td>Serratia species</td></tr> <tr><td>15</td><td>Sternotrophomonas/Xanthomonas species</td></tr> <tr><td>16</td><td>Yersinia species</td></tr> <tr><td>17</td><td>Other Gram negative species</td></tr> </table> | 1 | Escherichia coli             | 2 | Pseudomonas species          | 3 | Hemophilus influenzae        | 4 | Klebsiella species         | 5 | Acinetobacter species              | 6 | Enterobacter species     | 7 | Legionella species     | 8 | Moraxella catarrhalis   | 9 | Morganella species     | 10 | Neisseria meningitides        | 11 | Proteus species      | 12 | Citrobacter species | 13 | Salmonella species | 14 | Serratia species | 15 | Sternotrophomonas/Xanthomonas species | 16 | Yersinia species | 17 | Other Gram negative species |
| 1          | Escherichia coli                                                                                |                               |                                                                                                                                                                                                                                                                                                                                                                                                                                                                                                                                                                                                                                                                                                                                                                                                                                                                                                                        |   |                              |   |                              |   |                              |   |                            |   |                                    |   |                          |   |                        |   |                         |   |                        |    |                               |    |                      |    |                     |    |                    |    |                  |    |                                       |    |                  |    |                             |
| 2          | Pseudomonas species                                                                             |                               |                                                                                                                                                                                                                                                                                                                                                                                                                                                                                                                                                                                                                                                                                                                                                                                                                                                                                                                        |   |                              |   |                              |   |                              |   |                            |   |                                    |   |                          |   |                        |   |                         |   |                        |    |                               |    |                      |    |                     |    |                    |    |                  |    |                                       |    |                  |    |                             |
| 3          | Hemophilus influenzae                                                                           |                               |                                                                                                                                                                                                                                                                                                                                                                                                                                                                                                                                                                                                                                                                                                                                                                                                                                                                                                                        |   |                              |   |                              |   |                              |   |                            |   |                                    |   |                          |   |                        |   |                         |   |                        |    |                               |    |                      |    |                     |    |                    |    |                  |    |                                       |    |                  |    |                             |
| 4          | Klebsiella species                                                                              |                               |                                                                                                                                                                                                                                                                                                                                                                                                                                                                                                                                                                                                                                                                                                                                                                                                                                                                                                                        |   |                              |   |                              |   |                              |   |                            |   |                                    |   |                          |   |                        |   |                         |   |                        |    |                               |    |                      |    |                     |    |                    |    |                  |    |                                       |    |                  |    |                             |
| 5          | Acinetobacter species                                                                           |                               |                                                                                                                                                                                                                                                                                                                                                                                                                                                                                                                                                                                                                                                                                                                                                                                                                                                                                                                        |   |                              |   |                              |   |                              |   |                            |   |                                    |   |                          |   |                        |   |                         |   |                        |    |                               |    |                      |    |                     |    |                    |    |                  |    |                                       |    |                  |    |                             |
| 6          | Enterobacter species                                                                            |                               |                                                                                                                                                                                                                                                                                                                                                                                                                                                                                                                                                                                                                                                                                                                                                                                                                                                                                                                        |   |                              |   |                              |   |                              |   |                            |   |                                    |   |                          |   |                        |   |                         |   |                        |    |                               |    |                      |    |                     |    |                    |    |                  |    |                                       |    |                  |    |                             |
| 7          | Legionella species                                                                              |                               |                                                                                                                                                                                                                                                                                                                                                                                                                                                                                                                                                                                                                                                                                                                                                                                                                                                                                                                        |   |                              |   |                              |   |                              |   |                            |   |                                    |   |                          |   |                        |   |                         |   |                        |    |                               |    |                      |    |                     |    |                    |    |                  |    |                                       |    |                  |    |                             |
| 8          | Moraxella catarrhalis                                                                           |                               |                                                                                                                                                                                                                                                                                                                                                                                                                                                                                                                                                                                                                                                                                                                                                                                                                                                                                                                        |   |                              |   |                              |   |                              |   |                            |   |                                    |   |                          |   |                        |   |                         |   |                        |    |                               |    |                      |    |                     |    |                    |    |                  |    |                                       |    |                  |    |                             |
| 9          | Morganella species                                                                              |                               |                                                                                                                                                                                                                                                                                                                                                                                                                                                                                                                                                                                                                                                                                                                                                                                                                                                                                                                        |   |                              |   |                              |   |                              |   |                            |   |                                    |   |                          |   |                        |   |                         |   |                        |    |                               |    |                      |    |                     |    |                    |    |                  |    |                                       |    |                  |    |                             |
| 10         | Neisseria meningitides                                                                          |                               |                                                                                                                                                                                                                                                                                                                                                                                                                                                                                                                                                                                                                                                                                                                                                                                                                                                                                                                        |   |                              |   |                              |   |                              |   |                            |   |                                    |   |                          |   |                        |   |                         |   |                        |    |                               |    |                      |    |                     |    |                    |    |                  |    |                                       |    |                  |    |                             |
| 11         | Proteus species                                                                                 |                               |                                                                                                                                                                                                                                                                                                                                                                                                                                                                                                                                                                                                                                                                                                                                                                                                                                                                                                                        |   |                              |   |                              |   |                              |   |                            |   |                                    |   |                          |   |                        |   |                         |   |                        |    |                               |    |                      |    |                     |    |                    |    |                  |    |                                       |    |                  |    |                             |
| 12         | Citrobacter species                                                                             |                               |                                                                                                                                                                                                                                                                                                                                                                                                                                                                                                                                                                                                                                                                                                                                                                                                                                                                                                                        |   |                              |   |                              |   |                              |   |                            |   |                                    |   |                          |   |                        |   |                         |   |                        |    |                               |    |                      |    |                     |    |                    |    |                  |    |                                       |    |                  |    |                             |
| 13         | Salmonella species                                                                              |                               |                                                                                                                                                                                                                                                                                                                                                                                                                                                                                                                                                                                                                                                                                                                                                                                                                                                                                                                        |   |                              |   |                              |   |                              |   |                            |   |                                    |   |                          |   |                        |   |                         |   |                        |    |                               |    |                      |    |                     |    |                    |    |                  |    |                                       |    |                  |    |                             |
| 14         | Serratia species                                                                                |                               |                                                                                                                                                                                                                                                                                                                                                                                                                                                                                                                                                                                                                                                                                                                                                                                                                                                                                                                        |   |                              |   |                              |   |                              |   |                            |   |                                    |   |                          |   |                        |   |                         |   |                        |    |                               |    |                      |    |                     |    |                    |    |                  |    |                                       |    |                  |    |                             |
| 15         | Sternotrophomonas/Xanthomonas species                                                           |                               |                                                                                                                                                                                                                                                                                                                                                                                                                                                                                                                                                                                                                                                                                                                                                                                                                                                                                                                        |   |                              |   |                              |   |                              |   |                            |   |                                    |   |                          |   |                        |   |                         |   |                        |    |                               |    |                      |    |                     |    |                    |    |                  |    |                                       |    |                  |    |                             |
| 16         | Yersinia species                                                                                |                               |                                                                                                                                                                                                                                                                                                                                                                                                                                                                                                                                                                                                                                                                                                                                                                                                                                                                                                                        |   |                              |   |                              |   |                              |   |                            |   |                                    |   |                          |   |                        |   |                         |   |                        |    |                               |    |                      |    |                     |    |                    |    |                  |    |                                       |    |                  |    |                             |
| 17         | Other Gram negative species                                                                     |                               |                                                                                                                                                                                                                                                                                                                                                                                                                                                                                                                                                                                                                                                                                                                                                                                                                                                                                                                        |   |                              |   |                              |   |                              |   |                            |   |                                    |   |                          |   |                        |   |                         |   |                        |    |                               |    |                      |    |                     |    |                    |    |                  |    |                                       |    |                  |    |                             |
| <p>656</p> | <p>mycobacteria2_a62</p> <p>Show the field ONLY if:<br/>[microorganism2_ac8] = '4'</p>          | <p>Mycobacteria</p>           | <p>dropdown</p> <table border="1"> <tr><td>1</td><td>Mycobacterium tuberculosis</td></tr> <tr><td>2</td><td>Mycobacteria, other</td></tr> </table>                                                                                                                                                                                                                                                                                                                                                                                                                                                                                                                                                                                                                                                                                                                                                                     | 1 | Mycobacterium tuberculosis   | 2 | Mycobacteria, other          |   |                              |   |                            |   |                                    |   |                          |   |                        |   |                         |   |                        |    |                               |    |                      |    |                     |    |                    |    |                  |    |                                       |    |                  |    |                             |
| 1          | Mycobacterium tuberculosis                                                                      |                               |                                                                                                                                                                                                                                                                                                                                                                                                                                                                                                                                                                                                                                                                                                                                                                                                                                                                                                                        |   |                              |   |                              |   |                              |   |                            |   |                                    |   |                          |   |                        |   |                         |   |                        |    |                               |    |                      |    |                     |    |                    |    |                  |    |                                       |    |                  |    |                             |
| 2          | Mycobacteria, other                                                                             |                               |                                                                                                                                                                                                                                                                                                                                                                                                                                                                                                                                                                                                                                                                                                                                                                                                                                                                                                                        |   |                              |   |                              |   |                              |   |                            |   |                                    |   |                          |   |                        |   |                         |   |                        |    |                               |    |                      |    |                     |    |                    |    |                  |    |                                       |    |                  |    |                             |
| <p>657</p> | <p>anaerobic2_e5d</p> <p>Show the field ONLY if:<br/>[microorganism2_ac8] = '3'</p>             | <p>Anaerobic bacteria</p>     | <p>dropdown</p> <table border="1"> <tr><td>1</td><td>Actinomyces species</td></tr> <tr><td>2</td><td>Bacteriodes species</td></tr> <tr><td>3</td><td>Clostriduum difficile</td></tr> <tr><td>4</td><td>Clostridium, other species</td></tr> <tr><td>5</td><td>Peptostreptococcus species</td></tr> <tr><td>6</td><td>Other anaerobic bacteria</td></tr> </table>                                                                                                                                                                                                                                                                                                                                                                                                                                                                                                                                                       | 1 | Actinomyces species          | 2 | Bacteriodes species          | 3 | Clostriduum difficile        | 4 | Clostridium, other species | 5 | Peptostreptococcus species         | 6 | Other anaerobic bacteria |   |                        |   |                         |   |                        |    |                               |    |                      |    |                     |    |                    |    |                  |    |                                       |    |                  |    |                             |
| 1          | Actinomyces species                                                                             |                               |                                                                                                                                                                                                                                                                                                                                                                                                                                                                                                                                                                                                                                                                                                                                                                                                                                                                                                                        |   |                              |   |                              |   |                              |   |                            |   |                                    |   |                          |   |                        |   |                         |   |                        |    |                               |    |                      |    |                     |    |                    |    |                  |    |                                       |    |                  |    |                             |
| 2          | Bacteriodes species                                                                             |                               |                                                                                                                                                                                                                                                                                                                                                                                                                                                                                                                                                                                                                                                                                                                                                                                                                                                                                                                        |   |                              |   |                              |   |                              |   |                            |   |                                    |   |                          |   |                        |   |                         |   |                        |    |                               |    |                      |    |                     |    |                    |    |                  |    |                                       |    |                  |    |                             |
| 3          | Clostriduum difficile                                                                           |                               |                                                                                                                                                                                                                                                                                                                                                                                                                                                                                                                                                                                                                                                                                                                                                                                                                                                                                                                        |   |                              |   |                              |   |                              |   |                            |   |                                    |   |                          |   |                        |   |                         |   |                        |    |                               |    |                      |    |                     |    |                    |    |                  |    |                                       |    |                  |    |                             |
| 4          | Clostridium, other species                                                                      |                               |                                                                                                                                                                                                                                                                                                                                                                                                                                                                                                                                                                                                                                                                                                                                                                                                                                                                                                                        |   |                              |   |                              |   |                              |   |                            |   |                                    |   |                          |   |                        |   |                         |   |                        |    |                               |    |                      |    |                     |    |                    |    |                  |    |                                       |    |                  |    |                             |
| 5          | Peptostreptococcus species                                                                      |                               |                                                                                                                                                                                                                                                                                                                                                                                                                                                                                                                                                                                                                                                                                                                                                                                                                                                                                                                        |   |                              |   |                              |   |                              |   |                            |   |                                    |   |                          |   |                        |   |                         |   |                        |    |                               |    |                      |    |                     |    |                    |    |                  |    |                                       |    |                  |    |                             |
| 6          | Other anaerobic bacteria                                                                        |                               |                                                                                                                                                                                                                                                                                                                                                                                                                                                                                                                                                                                                                                                                                                                                                                                                                                                                                                                        |   |                              |   |                              |   |                              |   |                            |   |                                    |   |                          |   |                        |   |                         |   |                        |    |                               |    |                      |    |                     |    |                    |    |                  |    |                                       |    |                  |    |                             |
| <p>658</p> | <p>funga2_20b</p> <p>Show the field ONLY if:<br/>[microorganism2_ac8] = '5'</p>                 | <p>Fungal</p>                 | <p>dropdown</p> <table border="1"> <tr><td>1</td><td>Candida species</td></tr> <tr><td>2</td><td>Aspergillus species</td></tr> <tr><td>3</td><td>Blastomyces</td></tr> <tr><td>4</td><td>Mucor species</td></tr> <tr><td>5</td><td>Torulopsis species</td></tr> <tr><td>6</td><td>Coccidiomyces</td></tr> <tr><td>7</td><td>Histoplasma</td></tr> <tr><td>8</td><td>Other fungal species</td></tr> </table>                                                                                                                                                                                                                                                                                                                                                                                                                                                                                                            | 1 | Candida species              | 2 | Aspergillus species          | 3 | Blastomyces                  | 4 | Mucor species              | 5 | Torulopsis species                 | 6 | Coccidiomyces            | 7 | Histoplasma            | 8 | Other fungal species    |   |                        |    |                               |    |                      |    |                     |    |                    |    |                  |    |                                       |    |                  |    |                             |
| 1          | Candida species                                                                                 |                               |                                                                                                                                                                                                                                                                                                                                                                                                                                                                                                                                                                                                                                                                                                                                                                                                                                                                                                                        |   |                              |   |                              |   |                              |   |                            |   |                                    |   |                          |   |                        |   |                         |   |                        |    |                               |    |                      |    |                     |    |                    |    |                  |    |                                       |    |                  |    |                             |
| 2          | Aspergillus species                                                                             |                               |                                                                                                                                                                                                                                                                                                                                                                                                                                                                                                                                                                                                                                                                                                                                                                                                                                                                                                                        |   |                              |   |                              |   |                              |   |                            |   |                                    |   |                          |   |                        |   |                         |   |                        |    |                               |    |                      |    |                     |    |                    |    |                  |    |                                       |    |                  |    |                             |
| 3          | Blastomyces                                                                                     |                               |                                                                                                                                                                                                                                                                                                                                                                                                                                                                                                                                                                                                                                                                                                                                                                                                                                                                                                                        |   |                              |   |                              |   |                              |   |                            |   |                                    |   |                          |   |                        |   |                         |   |                        |    |                               |    |                      |    |                     |    |                    |    |                  |    |                                       |    |                  |    |                             |
| 4          | Mucor species                                                                                   |                               |                                                                                                                                                                                                                                                                                                                                                                                                                                                                                                                                                                                                                                                                                                                                                                                                                                                                                                                        |   |                              |   |                              |   |                              |   |                            |   |                                    |   |                          |   |                        |   |                         |   |                        |    |                               |    |                      |    |                     |    |                    |    |                  |    |                                       |    |                  |    |                             |
| 5          | Torulopsis species                                                                              |                               |                                                                                                                                                                                                                                                                                                                                                                                                                                                                                                                                                                                                                                                                                                                                                                                                                                                                                                                        |   |                              |   |                              |   |                              |   |                            |   |                                    |   |                          |   |                        |   |                         |   |                        |    |                               |    |                      |    |                     |    |                    |    |                  |    |                                       |    |                  |    |                             |
| 6          | Coccidiomyces                                                                                   |                               |                                                                                                                                                                                                                                                                                                                                                                                                                                                                                                                                                                                                                                                                                                                                                                                                                                                                                                                        |   |                              |   |                              |   |                              |   |                            |   |                                    |   |                          |   |                        |   |                         |   |                        |    |                               |    |                      |    |                     |    |                    |    |                  |    |                                       |    |                  |    |                             |
| 7          | Histoplasma                                                                                     |                               |                                                                                                                                                                                                                                                                                                                                                                                                                                                                                                                                                                                                                                                                                                                                                                                                                                                                                                                        |   |                              |   |                              |   |                              |   |                            |   |                                    |   |                          |   |                        |   |                         |   |                        |    |                               |    |                      |    |                     |    |                    |    |                  |    |                                       |    |                  |    |                             |
| 8          | Other fungal species                                                                            |                               |                                                                                                                                                                                                                                                                                                                                                                                                                                                                                                                                                                                                                                                                                                                                                                                                                                                                                                                        |   |                              |   |                              |   |                              |   |                            |   |                                    |   |                          |   |                        |   |                         |   |                        |    |                               |    |                      |    |                     |    |                    |    |                  |    |                                       |    |                  |    |                             |

|     |                                                                           |                                                                                                                                                                             |                                                                                                                                                                                                                                                                                                                                                                                                                                                                                                                                                                                                                                                                                                                                                                                                                                                                                                                                                                                                                                                                                                                                                                           |   |                       |    |                 |                       |                            |   |                       |                                              |       |                       |                                                                                      |   |                       |                                                                                        |                 |                       |                                                                                         |    |                             |                                        |     |                       |                                    |    |                       |                             |             |                       |                                                     |
|-----|---------------------------------------------------------------------------|-----------------------------------------------------------------------------------------------------------------------------------------------------------------------------|---------------------------------------------------------------------------------------------------------------------------------------------------------------------------------------------------------------------------------------------------------------------------------------------------------------------------------------------------------------------------------------------------------------------------------------------------------------------------------------------------------------------------------------------------------------------------------------------------------------------------------------------------------------------------------------------------------------------------------------------------------------------------------------------------------------------------------------------------------------------------------------------------------------------------------------------------------------------------------------------------------------------------------------------------------------------------------------------------------------------------------------------------------------------------|---|-----------------------|----|-----------------|-----------------------|----------------------------|---|-----------------------|----------------------------------------------|-------|-----------------------|--------------------------------------------------------------------------------------|---|-----------------------|----------------------------------------------------------------------------------------|-----------------|-----------------------|-----------------------------------------------------------------------------------------|----|-----------------------------|----------------------------------------|-----|-----------------------|------------------------------------|----|-----------------------|-----------------------------|-------------|-----------------------|-----------------------------------------------------|
| 659 | virus2_050<br>Show the field ONLY if:<br>[microorganism2_ac8] = '6'       | Virus                                                                                                                                                                       | dropdown<br><table border="1"> <tr><td>1</td><td>Adenovirus</td></tr> <tr><td>2</td><td>Cytomegalovirus</td></tr> <tr><td>3</td><td>Influenza A virus</td></tr> <tr><td>4</td><td>Influenza B virus</td></tr> <tr><td>5</td><td>HHV-1</td></tr> <tr><td>6</td><td>HHV-2</td></tr> <tr><td>7</td><td>Coronavirus</td></tr> <tr><td>8</td><td>Metapneumovirus</td></tr> <tr><td>9</td><td>Rhinovirus/Enterovirus</td></tr> <tr><td>10</td><td>Respiratory Syncytial virus</td></tr> <tr><td>11</td><td>EBV</td></tr> <tr><td>12</td><td>HHV-6</td></tr> <tr><td>13</td><td>VZV</td></tr> <tr><td>14</td><td>Other virus</td></tr> </table>                                                                                                                                                                                                                                                                                                                                                                                                                                                                                                                                  | 1 | Adenovirus            | 2  | Cytomegalovirus | 3                     | Influenza A virus          | 4 | Influenza B virus     | 5                                            | HHV-1 | 6                     | HHV-2                                                                                | 7 | Coronavirus           | 8                                                                                      | Metapneumovirus | 9                     | Rhinovirus/Enterovirus                                                                  | 10 | Respiratory Syncytial virus | 11                                     | EBV | 12                    | HHV-6                              | 13 | VZV                   | 14                          | Other virus |                       |                                                     |
| 1   | Adenovirus                                                                |                                                                                                                                                                             |                                                                                                                                                                                                                                                                                                                                                                                                                                                                                                                                                                                                                                                                                                                                                                                                                                                                                                                                                                                                                                                                                                                                                                           |   |                       |    |                 |                       |                            |   |                       |                                              |       |                       |                                                                                      |   |                       |                                                                                        |                 |                       |                                                                                         |    |                             |                                        |     |                       |                                    |    |                       |                             |             |                       |                                                     |
| 2   | Cytomegalovirus                                                           |                                                                                                                                                                             |                                                                                                                                                                                                                                                                                                                                                                                                                                                                                                                                                                                                                                                                                                                                                                                                                                                                                                                                                                                                                                                                                                                                                                           |   |                       |    |                 |                       |                            |   |                       |                                              |       |                       |                                                                                      |   |                       |                                                                                        |                 |                       |                                                                                         |    |                             |                                        |     |                       |                                    |    |                       |                             |             |                       |                                                     |
| 3   | Influenza A virus                                                         |                                                                                                                                                                             |                                                                                                                                                                                                                                                                                                                                                                                                                                                                                                                                                                                                                                                                                                                                                                                                                                                                                                                                                                                                                                                                                                                                                                           |   |                       |    |                 |                       |                            |   |                       |                                              |       |                       |                                                                                      |   |                       |                                                                                        |                 |                       |                                                                                         |    |                             |                                        |     |                       |                                    |    |                       |                             |             |                       |                                                     |
| 4   | Influenza B virus                                                         |                                                                                                                                                                             |                                                                                                                                                                                                                                                                                                                                                                                                                                                                                                                                                                                                                                                                                                                                                                                                                                                                                                                                                                                                                                                                                                                                                                           |   |                       |    |                 |                       |                            |   |                       |                                              |       |                       |                                                                                      |   |                       |                                                                                        |                 |                       |                                                                                         |    |                             |                                        |     |                       |                                    |    |                       |                             |             |                       |                                                     |
| 5   | HHV-1                                                                     |                                                                                                                                                                             |                                                                                                                                                                                                                                                                                                                                                                                                                                                                                                                                                                                                                                                                                                                                                                                                                                                                                                                                                                                                                                                                                                                                                                           |   |                       |    |                 |                       |                            |   |                       |                                              |       |                       |                                                                                      |   |                       |                                                                                        |                 |                       |                                                                                         |    |                             |                                        |     |                       |                                    |    |                       |                             |             |                       |                                                     |
| 6   | HHV-2                                                                     |                                                                                                                                                                             |                                                                                                                                                                                                                                                                                                                                                                                                                                                                                                                                                                                                                                                                                                                                                                                                                                                                                                                                                                                                                                                                                                                                                                           |   |                       |    |                 |                       |                            |   |                       |                                              |       |                       |                                                                                      |   |                       |                                                                                        |                 |                       |                                                                                         |    |                             |                                        |     |                       |                                    |    |                       |                             |             |                       |                                                     |
| 7   | Coronavirus                                                               |                                                                                                                                                                             |                                                                                                                                                                                                                                                                                                                                                                                                                                                                                                                                                                                                                                                                                                                                                                                                                                                                                                                                                                                                                                                                                                                                                                           |   |                       |    |                 |                       |                            |   |                       |                                              |       |                       |                                                                                      |   |                       |                                                                                        |                 |                       |                                                                                         |    |                             |                                        |     |                       |                                    |    |                       |                             |             |                       |                                                     |
| 8   | Metapneumovirus                                                           |                                                                                                                                                                             |                                                                                                                                                                                                                                                                                                                                                                                                                                                                                                                                                                                                                                                                                                                                                                                                                                                                                                                                                                                                                                                                                                                                                                           |   |                       |    |                 |                       |                            |   |                       |                                              |       |                       |                                                                                      |   |                       |                                                                                        |                 |                       |                                                                                         |    |                             |                                        |     |                       |                                    |    |                       |                             |             |                       |                                                     |
| 9   | Rhinovirus/Enterovirus                                                    |                                                                                                                                                                             |                                                                                                                                                                                                                                                                                                                                                                                                                                                                                                                                                                                                                                                                                                                                                                                                                                                                                                                                                                                                                                                                                                                                                                           |   |                       |    |                 |                       |                            |   |                       |                                              |       |                       |                                                                                      |   |                       |                                                                                        |                 |                       |                                                                                         |    |                             |                                        |     |                       |                                    |    |                       |                             |             |                       |                                                     |
| 10  | Respiratory Syncytial virus                                               |                                                                                                                                                                             |                                                                                                                                                                                                                                                                                                                                                                                                                                                                                                                                                                                                                                                                                                                                                                                                                                                                                                                                                                                                                                                                                                                                                                           |   |                       |    |                 |                       |                            |   |                       |                                              |       |                       |                                                                                      |   |                       |                                                                                        |                 |                       |                                                                                         |    |                             |                                        |     |                       |                                    |    |                       |                             |             |                       |                                                     |
| 11  | EBV                                                                       |                                                                                                                                                                             |                                                                                                                                                                                                                                                                                                                                                                                                                                                                                                                                                                                                                                                                                                                                                                                                                                                                                                                                                                                                                                                                                                                                                                           |   |                       |    |                 |                       |                            |   |                       |                                              |       |                       |                                                                                      |   |                       |                                                                                        |                 |                       |                                                                                         |    |                             |                                        |     |                       |                                    |    |                       |                             |             |                       |                                                     |
| 12  | HHV-6                                                                     |                                                                                                                                                                             |                                                                                                                                                                                                                                                                                                                                                                                                                                                                                                                                                                                                                                                                                                                                                                                                                                                                                                                                                                                                                                                                                                                                                                           |   |                       |    |                 |                       |                            |   |                       |                                              |       |                       |                                                                                      |   |                       |                                                                                        |                 |                       |                                                                                         |    |                             |                                        |     |                       |                                    |    |                       |                             |             |                       |                                                     |
| 13  | VZV                                                                       |                                                                                                                                                                             |                                                                                                                                                                                                                                                                                                                                                                                                                                                                                                                                                                                                                                                                                                                                                                                                                                                                                                                                                                                                                                                                                                                                                                           |   |                       |    |                 |                       |                            |   |                       |                                              |       |                       |                                                                                      |   |                       |                                                                                        |                 |                       |                                                                                         |    |                             |                                        |     |                       |                                    |    |                       |                             |             |                       |                                                     |
| 14  | Other virus                                                               |                                                                                                                                                                             |                                                                                                                                                                                                                                                                                                                                                                                                                                                                                                                                                                                                                                                                                                                                                                                                                                                                                                                                                                                                                                                                                                                                                                           |   |                       |    |                 |                       |                            |   |                       |                                              |       |                       |                                                                                      |   |                       |                                                                                        |                 |                       |                                                                                         |    |                             |                                        |     |                       |                                    |    |                       |                             |             |                       |                                                     |
| 660 | corticosteroids<br>Show the field ONLY if:<br>[sepsis_suspicion] = '1'    | Corticosteroids > 49 mg hydrocortisone equivalent?                                                                                                                          | dropdown<br><table border="1"> <tr><td>1</td><td>Yes</td></tr> <tr><td>0</td><td>No</td></tr> </table>                                                                                                                                                                                                                                                                                                                                                                                                                                                                                                                                                                                                                                                                                                                                                                                                                                                                                                                                                                                                                                                                    | 1 | Yes                   | 0  | No              |                       |                            |   |                       |                                              |       |                       |                                                                                      |   |                       |                                                                                        |                 |                       |                                                                                         |    |                             |                                        |     |                       |                                    |    |                       |                             |             |                       |                                                     |
| 1   | Yes                                                                       |                                                                                                                                                                             |                                                                                                                                                                                                                                                                                                                                                                                                                                                                                                                                                                                                                                                                                                                                                                                                                                                                                                                                                                                                                                                                                                                                                                           |   |                       |    |                 |                       |                            |   |                       |                                              |       |                       |                                                                                      |   |                       |                                                                                        |                 |                       |                                                                                         |    |                             |                                        |     |                       |                                    |    |                       |                             |             |                       |                                                     |
| 0   | No                                                                        |                                                                                                                                                                             |                                                                                                                                                                                                                                                                                                                                                                                                                                                                                                                                                                                                                                                                                                                                                                                                                                                                                                                                                                                                                                                                                                                                                                           |   |                       |    |                 |                       |                            |   |                       |                                              |       |                       |                                                                                      |   |                       |                                                                                        |                 |                       |                                                                                         |    |                             |                                        |     |                       |                                    |    |                       |                             |             |                       |                                                     |
| 661 | antibiotics_sepsis<br>Show the field ONLY if:<br>[sepsis_suspicion] = '1' | Antibiotics?                                                                                                                                                                | dropdown<br><table border="1"> <tr><td>1</td><td>Yes</td></tr> <tr><td>0</td><td>No</td></tr> </table>                                                                                                                                                                                                                                                                                                                                                                                                                                                                                                                                                                                                                                                                                                                                                                                                                                                                                                                                                                                                                                                                    | 1 | Yes                   | 0  | No              |                       |                            |   |                       |                                              |       |                       |                                                                                      |   |                       |                                                                                        |                 |                       |                                                                                         |    |                             |                                        |     |                       |                                    |    |                       |                             |             |                       |                                                     |
| 1   | Yes                                                                       |                                                                                                                                                                             |                                                                                                                                                                                                                                                                                                                                                                                                                                                                                                                                                                                                                                                                                                                                                                                                                                                                                                                                                                                                                                                                                                                                                                           |   |                       |    |                 |                       |                            |   |                       |                                              |       |                       |                                                                                      |   |                       |                                                                                        |                 |                       |                                                                                         |    |                             |                                        |     |                       |                                    |    |                       |                             |             |                       |                                                     |
| 0   | No                                                                        |                                                                                                                                                                             |                                                                                                                                                                                                                                                                                                                                                                                                                                                                                                                                                                                                                                                                                                                                                                                                                                                                                                                                                                                                                                                                                                                                                                           |   |                       |    |                 |                       |                            |   |                       |                                              |       |                       |                                                                                      |   |                       |                                                                                        |                 |                       |                                                                                         |    |                             |                                        |     |                       |                                    |    |                       |                             |             |                       |                                                     |
| 662 | days_antibiot<br>Show the field ONLY if:<br>[antibiotics_sepsis] = '1'    | Days on antibiotics?                                                                                                                                                        | text                                                                                                                                                                                                                                                                                                                                                                                                                                                                                                                                                                                                                                                                                                                                                                                                                                                                                                                                                                                                                                                                                                                                                                      |   |                       |    |                 |                       |                            |   |                       |                                              |       |                       |                                                                                      |   |                       |                                                                                        |                 |                       |                                                                                         |    |                             |                                        |     |                       |                                    |    |                       |                             |             |                       |                                                     |
| 663 | severe_sepsis_crit                                                        | Severe sepsis                                                                                                                                                               | checkbox<br><table border="1"> <tr><td>0</td><td>severe_sepsis_crit__0</td><td>No</td></tr> <tr><td>1</td><td>severe_sepsis_crit__1</td><td>Sepsis-induced hypotension</td></tr> <tr><td>2</td><td>severe_sepsis_crit__2</td><td>Lactate above upper limits laboratory normal</td></tr> <tr><td>3</td><td>severe_sepsis_crit__3</td><td>Urine output &lt; 0.5 mL/kg/hr for more than 2 hrs despite adequate fluid resuscitation</td></tr> <tr><td>4</td><td>severe_sepsis_crit__4</td><td>Acute lung injury with Pao2/Fio2 &lt; 250 in the absence of pneumonia as infection source</td></tr> <tr><td>5</td><td>severe_sepsis_crit__5</td><td>Acute lung injury with Pao2/Fio2 &lt; 200 in the presence of pneumonia as infection source</td></tr> <tr><td>6</td><td>severe_sepsis_crit__6</td><td>Creatinine &gt; 2.0 mg/dL (176.8 ? mol/L)</td></tr> <tr><td>7</td><td>severe_sepsis_crit__7</td><td>Bilirubin &gt; 2 mg/dL (34.2 ? mol/L)</td></tr> <tr><td>8</td><td>severe_sepsis_crit__8</td><td>Platelet count &lt; 100,000 ?L</td></tr> <tr><td>9</td><td>severe_sepsis_crit__9</td><td>Coagulopathy (international normalized ratio &gt; 1.5)</td></tr> </table> | 0 | severe_sepsis_crit__0 | No | 1               | severe_sepsis_crit__1 | Sepsis-induced hypotension | 2 | severe_sepsis_crit__2 | Lactate above upper limits laboratory normal | 3     | severe_sepsis_crit__3 | Urine output < 0.5 mL/kg/hr for more than 2 hrs despite adequate fluid resuscitation | 4 | severe_sepsis_crit__4 | Acute lung injury with Pao2/Fio2 < 250 in the absence of pneumonia as infection source | 5               | severe_sepsis_crit__5 | Acute lung injury with Pao2/Fio2 < 200 in the presence of pneumonia as infection source | 6  | severe_sepsis_crit__6       | Creatinine > 2.0 mg/dL (176.8 ? mol/L) | 7   | severe_sepsis_crit__7 | Bilirubin > 2 mg/dL (34.2 ? mol/L) | 8  | severe_sepsis_crit__8 | Platelet count < 100,000 ?L | 9           | severe_sepsis_crit__9 | Coagulopathy (international normalized ratio > 1.5) |
| 0   | severe_sepsis_crit__0                                                     | No                                                                                                                                                                          |                                                                                                                                                                                                                                                                                                                                                                                                                                                                                                                                                                                                                                                                                                                                                                                                                                                                                                                                                                                                                                                                                                                                                                           |   |                       |    |                 |                       |                            |   |                       |                                              |       |                       |                                                                                      |   |                       |                                                                                        |                 |                       |                                                                                         |    |                             |                                        |     |                       |                                    |    |                       |                             |             |                       |                                                     |
| 1   | severe_sepsis_crit__1                                                     | Sepsis-induced hypotension                                                                                                                                                  |                                                                                                                                                                                                                                                                                                                                                                                                                                                                                                                                                                                                                                                                                                                                                                                                                                                                                                                                                                                                                                                                                                                                                                           |   |                       |    |                 |                       |                            |   |                       |                                              |       |                       |                                                                                      |   |                       |                                                                                        |                 |                       |                                                                                         |    |                             |                                        |     |                       |                                    |    |                       |                             |             |                       |                                                     |
| 2   | severe_sepsis_crit__2                                                     | Lactate above upper limits laboratory normal                                                                                                                                |                                                                                                                                                                                                                                                                                                                                                                                                                                                                                                                                                                                                                                                                                                                                                                                                                                                                                                                                                                                                                                                                                                                                                                           |   |                       |    |                 |                       |                            |   |                       |                                              |       |                       |                                                                                      |   |                       |                                                                                        |                 |                       |                                                                                         |    |                             |                                        |     |                       |                                    |    |                       |                             |             |                       |                                                     |
| 3   | severe_sepsis_crit__3                                                     | Urine output < 0.5 mL/kg/hr for more than 2 hrs despite adequate fluid resuscitation                                                                                        |                                                                                                                                                                                                                                                                                                                                                                                                                                                                                                                                                                                                                                                                                                                                                                                                                                                                                                                                                                                                                                                                                                                                                                           |   |                       |    |                 |                       |                            |   |                       |                                              |       |                       |                                                                                      |   |                       |                                                                                        |                 |                       |                                                                                         |    |                             |                                        |     |                       |                                    |    |                       |                             |             |                       |                                                     |
| 4   | severe_sepsis_crit__4                                                     | Acute lung injury with Pao2/Fio2 < 250 in the absence of pneumonia as infection source                                                                                      |                                                                                                                                                                                                                                                                                                                                                                                                                                                                                                                                                                                                                                                                                                                                                                                                                                                                                                                                                                                                                                                                                                                                                                           |   |                       |    |                 |                       |                            |   |                       |                                              |       |                       |                                                                                      |   |                       |                                                                                        |                 |                       |                                                                                         |    |                             |                                        |     |                       |                                    |    |                       |                             |             |                       |                                                     |
| 5   | severe_sepsis_crit__5                                                     | Acute lung injury with Pao2/Fio2 < 200 in the presence of pneumonia as infection source                                                                                     |                                                                                                                                                                                                                                                                                                                                                                                                                                                                                                                                                                                                                                                                                                                                                                                                                                                                                                                                                                                                                                                                                                                                                                           |   |                       |    |                 |                       |                            |   |                       |                                              |       |                       |                                                                                      |   |                       |                                                                                        |                 |                       |                                                                                         |    |                             |                                        |     |                       |                                    |    |                       |                             |             |                       |                                                     |
| 6   | severe_sepsis_crit__6                                                     | Creatinine > 2.0 mg/dL (176.8 ? mol/L)                                                                                                                                      |                                                                                                                                                                                                                                                                                                                                                                                                                                                                                                                                                                                                                                                                                                                                                                                                                                                                                                                                                                                                                                                                                                                                                                           |   |                       |    |                 |                       |                            |   |                       |                                              |       |                       |                                                                                      |   |                       |                                                                                        |                 |                       |                                                                                         |    |                             |                                        |     |                       |                                    |    |                       |                             |             |                       |                                                     |
| 7   | severe_sepsis_crit__7                                                     | Bilirubin > 2 mg/dL (34.2 ? mol/L)                                                                                                                                          |                                                                                                                                                                                                                                                                                                                                                                                                                                                                                                                                                                                                                                                                                                                                                                                                                                                                                                                                                                                                                                                                                                                                                                           |   |                       |    |                 |                       |                            |   |                       |                                              |       |                       |                                                                                      |   |                       |                                                                                        |                 |                       |                                                                                         |    |                             |                                        |     |                       |                                    |    |                       |                             |             |                       |                                                     |
| 8   | severe_sepsis_crit__8                                                     | Platelet count < 100,000 ?L                                                                                                                                                 |                                                                                                                                                                                                                                                                                                                                                                                                                                                                                                                                                                                                                                                                                                                                                                                                                                                                                                                                                                                                                                                                                                                                                                           |   |                       |    |                 |                       |                            |   |                       |                                              |       |                       |                                                                                      |   |                       |                                                                                        |                 |                       |                                                                                         |    |                             |                                        |     |                       |                                    |    |                       |                             |             |                       |                                                     |
| 9   | severe_sepsis_crit__9                                                     | Coagulopathy (international normalized ratio > 1.5)                                                                                                                         |                                                                                                                                                                                                                                                                                                                                                                                                                                                                                                                                                                                                                                                                                                                                                                                                                                                                                                                                                                                                                                                                                                                                                                           |   |                       |    |                 |                       |                            |   |                       |                                              |       |                       |                                                                                      |   |                       |                                                                                        |                 |                       |                                                                                         |    |                             |                                        |     |                       |                                    |    |                       |                             |             |                       |                                                     |
| 664 | severe_sepsis                                                             | Severe Sepsis?<br><i>sepsis-induced tissue hypoperfusion or organ dysfunction (any of the above thought to be due to the infection)</i>                                     | dropdown<br><table border="1"> <tr><td>1</td><td>Yes</td></tr> <tr><td>0</td><td>No</td></tr> </table>                                                                                                                                                                                                                                                                                                                                                                                                                                                                                                                                                                                                                                                                                                                                                                                                                                                                                                                                                                                                                                                                    | 1 | Yes                   | 0  | No              |                       |                            |   |                       |                                              |       |                       |                                                                                      |   |                       |                                                                                        |                 |                       |                                                                                         |    |                             |                                        |     |                       |                                    |    |                       |                             |             |                       |                                                     |
| 1   | Yes                                                                       |                                                                                                                                                                             |                                                                                                                                                                                                                                                                                                                                                                                                                                                                                                                                                                                                                                                                                                                                                                                                                                                                                                                                                                                                                                                                                                                                                                           |   |                       |    |                 |                       |                            |   |                       |                                              |       |                       |                                                                                      |   |                       |                                                                                        |                 |                       |                                                                                         |    |                             |                                        |     |                       |                                    |    |                       |                             |             |                       |                                                     |
| 0   | No                                                                        |                                                                                                                                                                             |                                                                                                                                                                                                                                                                                                                                                                                                                                                                                                                                                                                                                                                                                                                                                                                                                                                                                                                                                                                                                                                                                                                                                                           |   |                       |    |                 |                       |                            |   |                       |                                              |       |                       |                                                                                      |   |                       |                                                                                        |                 |                       |                                                                                         |    |                             |                                        |     |                       |                                    |    |                       |                             |             |                       |                                                     |
| 665 | septic_shock                                                              | Septic Shock<br><i>Sepsis with hypotension (despite fluid resuscitation) PLUS hypoperfusion abnormalities</i>                                                               | dropdown<br><table border="1"> <tr><td>1</td><td>Yes</td></tr> <tr><td>0</td><td>No</td></tr> </table>                                                                                                                                                                                                                                                                                                                                                                                                                                                                                                                                                                                                                                                                                                                                                                                                                                                                                                                                                                                                                                                                    | 1 | Yes                   | 0  | No              |                       |                            |   |                       |                                              |       |                       |                                                                                      |   |                       |                                                                                        |                 |                       |                                                                                         |    |                             |                                        |     |                       |                                    |    |                       |                             |             |                       |                                                     |
| 1   | Yes                                                                       |                                                                                                                                                                             |                                                                                                                                                                                                                                                                                                                                                                                                                                                                                                                                                                                                                                                                                                                                                                                                                                                                                                                                                                                                                                                                                                                                                                           |   |                       |    |                 |                       |                            |   |                       |                                              |       |                       |                                                                                      |   |                       |                                                                                        |                 |                       |                                                                                         |    |                             |                                        |     |                       |                                    |    |                       |                             |             |                       |                                                     |
| 0   | No                                                                        |                                                                                                                                                                             |                                                                                                                                                                                                                                                                                                                                                                                                                                                                                                                                                                                                                                                                                                                                                                                                                                                                                                                                                                                                                                                                                                                                                                           |   |                       |    |                 |                       |                            |   |                       |                                              |       |                       |                                                                                      |   |                       |                                                                                        |                 |                       |                                                                                         |    |                             |                                        |     |                       |                                    |    |                       |                             |             |                       |                                                     |
| 666 | mods                                                                      | Multiple Organ Dysfunction Syndrome<br><i>Presence of altered organ function in an acutely ill patient such that homeostasis cannot be maintained without intervention.</i> | dropdown<br><table border="1"> <tr><td>1</td><td>Yes</td></tr> <tr><td>0</td><td>No</td></tr> </table>                                                                                                                                                                                                                                                                                                                                                                                                                                                                                                                                                                                                                                                                                                                                                                                                                                                                                                                                                                                                                                                                    | 1 | Yes                   | 0  | No              |                       |                            |   |                       |                                              |       |                       |                                                                                      |   |                       |                                                                                        |                 |                       |                                                                                         |    |                             |                                        |     |                       |                                    |    |                       |                             |             |                       |                                                     |
| 1   | Yes                                                                       |                                                                                                                                                                             |                                                                                                                                                                                                                                                                                                                                                                                                                                                                                                                                                                                                                                                                                                                                                                                                                                                                                                                                                                                                                                                                                                                                                                           |   |                       |    |                 |                       |                            |   |                       |                                              |       |                       |                                                                                      |   |                       |                                                                                        |                 |                       |                                                                                         |    |                             |                                        |     |                       |                                    |    |                       |                             |             |                       |                                                     |
| 0   | No                                                                        |                                                                                                                                                                             |                                                                                                                                                                                                                                                                                                                                                                                                                                                                                                                                                                                                                                                                                                                                                                                                                                                                                                                                                                                                                                                                                                                                                                           |   |                       |    |                 |                       |                            |   |                       |                                              |       |                       |                                                                                      |   |                       |                                                                                        |                 |                       |                                                                                         |    |                             |                                        |     |                       |                                    |    |                       |                             |             |                       |                                                     |

|                                                  |                                                                        |                                                 |                                                                                                                                                                                                                                                                                                                                                               |   |                      |              |                        |                    |            |    |                     |                |   |             |            |   |             |                           |
|--------------------------------------------------|------------------------------------------------------------------------|-------------------------------------------------|---------------------------------------------------------------------------------------------------------------------------------------------------------------------------------------------------------------------------------------------------------------------------------------------------------------------------------------------------------------|---|----------------------|--------------|------------------------|--------------------|------------|----|---------------------|----------------|---|-------------|------------|---|-------------|---------------------------|
| 667                                              | sepsis_spectrum_complete                                               | Section Header: <i>Form Status</i><br>Complete? | dropdown<br><table border="1"> <tr><td>0</td><td>Incomplete</td></tr> <tr><td>1</td><td>Unverified</td></tr> <tr><td>2</td><td>Complete</td></tr> </table>                                                                                                                                                                                                    | 0 | Incomplete           | 1            | Unverified             | 2                  | Complete   |    |                     |                |   |             |            |   |             |                           |
| 0                                                | Incomplete                                                             |                                                 |                                                                                                                                                                                                                                                                                                                                                               |   |                      |              |                        |                    |            |    |                     |                |   |             |            |   |             |                           |
| 1                                                | Unverified                                                             |                                                 |                                                                                                                                                                                                                                                                                                                                                               |   |                      |              |                        |                    |            |    |                     |                |   |             |            |   |             |                           |
| 2                                                | Complete                                                               |                                                 |                                                                                                                                                                                                                                                                                                                                                               |   |                      |              |                        |                    |            |    |                     |                |   |             |            |   |             |                           |
| Instrument: <b>Chest Imaging</b> (chest_imaging) |                                                                        |                                                 |                                                                                                                                                                                                                                                                                                                                                               |   |                      |              |                        |                    |            |    |                     |                |   |             |            |   |             |                           |
| 668                                              | type_of_imaging                                                        | Type of imaging taken                           | checkbox<br><table border="1"> <tr><td>1</td><td>type_of_imaging__1</td><td>Chest X rays</td></tr> <tr><td>2</td><td>type_of_imaging__2</td><td>CT scan</td></tr> <tr><td>99</td><td>type_of_imaging__99</td><td>Not applicable</td></tr> </table>                                                                                                            | 1 | type_of_imaging__1   | Chest X rays | 2                      | type_of_imaging__2 | CT scan    | 99 | type_of_imaging__99 | Not applicable |   |             |            |   |             |                           |
| 1                                                | type_of_imaging__1                                                     | Chest X rays                                    |                                                                                                                                                                                                                                                                                                                                                               |   |                      |              |                        |                    |            |    |                     |                |   |             |            |   |             |                           |
| 2                                                | type_of_imaging__2                                                     | CT scan                                         |                                                                                                                                                                                                                                                                                                                                                               |   |                      |              |                        |                    |            |    |                     |                |   |             |            |   |             |                           |
| 99                                               | type_of_imaging__99                                                    | Not applicable                                  |                                                                                                                                                                                                                                                                                                                                                               |   |                      |              |                        |                    |            |    |                     |                |   |             |            |   |             |                           |
| 669                                              | cxr_date<br>Show the field ONLY if:<br>[type_of_imaging(1)] = '1'      | CXR date                                        | text (date_mdy)                                                                                                                                                                                                                                                                                                                                               |   |                      |              |                        |                    |            |    |                     |                |   |             |            |   |             |                           |
| 670                                              | cxr<br>Show the field ONLY if:<br>[type_of_imaging(1)] = '1'           | Chest X ray alveolar consolidation              | checkbox<br><table border="1"> <tr><td>1</td><td>cxr__1</td><td>Quadrant 1</td></tr> <tr><td>2</td><td>cxr__2</td><td>Quadrant 2</td></tr> <tr><td>3</td><td>cxr__3</td><td>Quadrant 3</td></tr> <tr><td>4</td><td>cxr__4</td><td>Quadrant 4</td></tr> <tr><td>0</td><td>cxr__0</td><td>No alveolar consolidation</td></tr> </table>                          | 1 | cxr__1               | Quadrant 1   | 2                      | cxr__2             | Quadrant 2 | 3  | cxr__3              | Quadrant 3     | 4 | cxr__4      | Quadrant 4 | 0 | cxr__0      | No alveolar consolidation |
| 1                                                | cxr__1                                                                 | Quadrant 1                                      |                                                                                                                                                                                                                                                                                                                                                               |   |                      |              |                        |                    |            |    |                     |                |   |             |            |   |             |                           |
| 2                                                | cxr__2                                                                 | Quadrant 2                                      |                                                                                                                                                                                                                                                                                                                                                               |   |                      |              |                        |                    |            |    |                     |                |   |             |            |   |             |                           |
| 3                                                | cxr__3                                                                 | Quadrant 3                                      |                                                                                                                                                                                                                                                                                                                                                               |   |                      |              |                        |                    |            |    |                     |                |   |             |            |   |             |                           |
| 4                                                | cxr__4                                                                 | Quadrant 4                                      |                                                                                                                                                                                                                                                                                                                                                               |   |                      |              |                        |                    |            |    |                     |                |   |             |            |   |             |                           |
| 0                                                | cxr__0                                                                 | No alveolar consolidation                       |                                                                                                                                                                                                                                                                                                                                                               |   |                      |              |                        |                    |            |    |                     |                |   |             |            |   |             |                           |
| 671                                              | rx_definition<br>Show the field ONLY if:<br>[type_of_imaging(1)] = '1' | Chest X ray definition                          | dropdown<br><table border="1"> <tr><td>1</td><td>Consistent with ARDS</td></tr> <tr><td>2</td><td>Inconsistent with ARDS</td></tr> <tr><td>0</td><td>equivocal</td></tr> </table>                                                                                                                                                                             | 1 | Consistent with ARDS | 2            | Inconsistent with ARDS | 0                  | equivocal  |    |                     |                |   |             |            |   |             |                           |
| 1                                                | Consistent with ARDS                                                   |                                                 |                                                                                                                                                                                                                                                                                                                                                               |   |                      |              |                        |                    |            |    |                     |                |   |             |            |   |             |                           |
| 2                                                | Inconsistent with ARDS                                                 |                                                 |                                                                                                                                                                                                                                                                                                                                                               |   |                      |              |                        |                    |            |    |                     |                |   |             |            |   |             |                           |
| 0                                                | equivocal                                                              |                                                 |                                                                                                                                                                                                                                                                                                                                                               |   |                      |              |                        |                    |            |    |                     |                |   |             |            |   |             |                           |
| 672                                              | cxr2                                                                   | Is there another X Ray?                         | dropdown<br><table border="1"> <tr><td>1</td><td>Yes</td></tr> <tr><td>0</td><td>No</td></tr> </table>                                                                                                                                                                                                                                                        | 1 | Yes                  | 0            | No                     |                    |            |    |                     |                |   |             |            |   |             |                           |
| 1                                                | Yes                                                                    |                                                 |                                                                                                                                                                                                                                                                                                                                                               |   |                      |              |                        |                    |            |    |                     |                |   |             |            |   |             |                           |
| 0                                                | No                                                                     |                                                 |                                                                                                                                                                                                                                                                                                                                                               |   |                      |              |                        |                    |            |    |                     |                |   |             |            |   |             |                           |
| 673                                              | cxr_date2_ea6<br>Show the field ONLY if:<br>[cxr2] = '1'               | CXR date                                        | text (date_mdy)                                                                                                                                                                                                                                                                                                                                               |   |                      |              |                        |                    |            |    |                     |                |   |             |            |   |             |                           |
| 674                                              | cxr2_728<br>Show the field ONLY if:<br>[cxr2] = '1'                    | Chest X ray alveolar consolidation              | checkbox<br><table border="1"> <tr><td>1</td><td>cxr2_728__1</td><td>Quadrant 1</td></tr> <tr><td>2</td><td>cxr2_728__2</td><td>Quadrant 2</td></tr> <tr><td>3</td><td>cxr2_728__3</td><td>Quadrant 3</td></tr> <tr><td>4</td><td>cxr2_728__4</td><td>Quadrant 4</td></tr> <tr><td>0</td><td>cxr2_728__0</td><td>No alveolar consolidation</td></tr> </table> | 1 | cxr2_728__1          | Quadrant 1   | 2                      | cxr2_728__2        | Quadrant 2 | 3  | cxr2_728__3         | Quadrant 3     | 4 | cxr2_728__4 | Quadrant 4 | 0 | cxr2_728__0 | No alveolar consolidation |
| 1                                                | cxr2_728__1                                                            | Quadrant 1                                      |                                                                                                                                                                                                                                                                                                                                                               |   |                      |              |                        |                    |            |    |                     |                |   |             |            |   |             |                           |
| 2                                                | cxr2_728__2                                                            | Quadrant 2                                      |                                                                                                                                                                                                                                                                                                                                                               |   |                      |              |                        |                    |            |    |                     |                |   |             |            |   |             |                           |
| 3                                                | cxr2_728__3                                                            | Quadrant 3                                      |                                                                                                                                                                                                                                                                                                                                                               |   |                      |              |                        |                    |            |    |                     |                |   |             |            |   |             |                           |
| 4                                                | cxr2_728__4                                                            | Quadrant 4                                      |                                                                                                                                                                                                                                                                                                                                                               |   |                      |              |                        |                    |            |    |                     |                |   |             |            |   |             |                           |
| 0                                                | cxr2_728__0                                                            | No alveolar consolidation                       |                                                                                                                                                                                                                                                                                                                                                               |   |                      |              |                        |                    |            |    |                     |                |   |             |            |   |             |                           |
| 675                                              | rx_definition2_d10<br>Show the field ONLY if:<br>[cxr2] = '1'          | Chest X ray definition                          | dropdown<br><table border="1"> <tr><td>1</td><td>Consistent with ARDS</td></tr> <tr><td>2</td><td>Inconsistent with ARDS</td></tr> <tr><td>0</td><td>equivocal</td></tr> </table>                                                                                                                                                                             | 1 | Consistent with ARDS | 2            | Inconsistent with ARDS | 0                  | equivocal  |    |                     |                |   |             |            |   |             |                           |
| 1                                                | Consistent with ARDS                                                   |                                                 |                                                                                                                                                                                                                                                                                                                                                               |   |                      |              |                        |                    |            |    |                     |                |   |             |            |   |             |                           |
| 2                                                | Inconsistent with ARDS                                                 |                                                 |                                                                                                                                                                                                                                                                                                                                                               |   |                      |              |                        |                    |            |    |                     |                |   |             |            |   |             |                           |
| 0                                                | equivocal                                                              |                                                 |                                                                                                                                                                                                                                                                                                                                                               |   |                      |              |                        |                    |            |    |                     |                |   |             |            |   |             |                           |
| 676                                              | cxr3                                                                   | Is there another X Ray?                         | dropdown<br><table border="1"> <tr><td>1</td><td>Yes</td></tr> <tr><td>0</td><td>No</td></tr> </table>                                                                                                                                                                                                                                                        | 1 | Yes                  | 0            | No                     |                    |            |    |                     |                |   |             |            |   |             |                           |
| 1                                                | Yes                                                                    |                                                 |                                                                                                                                                                                                                                                                                                                                                               |   |                      |              |                        |                    |            |    |                     |                |   |             |            |   |             |                           |
| 0                                                | No                                                                     |                                                 |                                                                                                                                                                                                                                                                                                                                                               |   |                      |              |                        |                    |            |    |                     |                |   |             |            |   |             |                           |
| 677                                              | cxr_date2_8f2<br>Show the field ONLY if:<br>[cxr3] = '1'               | CXR date                                        | text (date_mdy)                                                                                                                                                                                                                                                                                                                                               |   |                      |              |                        |                    |            |    |                     |                |   |             |            |   |             |                           |
| 678                                              | cxr2_ba4<br>Show the field ONLY if:<br>[cxr3] = '1'                    | Chest X ray alveolar consolidation              | checkbox<br><table border="1"> <tr><td>1</td><td>cxr2_ba4__1</td><td>Quadrant 1</td></tr> <tr><td>2</td><td>cxr2_ba4__2</td><td>Quadrant 2</td></tr> <tr><td>3</td><td>cxr2_ba4__3</td><td>Quadrant 3</td></tr> <tr><td>4</td><td>cxr2_ba4__4</td><td>Quadrant 4</td></tr> <tr><td>0</td><td>cxr2_ba4__0</td><td>No alveolar consolidation</td></tr> </table> | 1 | cxr2_ba4__1          | Quadrant 1   | 2                      | cxr2_ba4__2        | Quadrant 2 | 3  | cxr2_ba4__3         | Quadrant 3     | 4 | cxr2_ba4__4 | Quadrant 4 | 0 | cxr2_ba4__0 | No alveolar consolidation |
| 1                                                | cxr2_ba4__1                                                            | Quadrant 1                                      |                                                                                                                                                                                                                                                                                                                                                               |   |                      |              |                        |                    |            |    |                     |                |   |             |            |   |             |                           |
| 2                                                | cxr2_ba4__2                                                            | Quadrant 2                                      |                                                                                                                                                                                                                                                                                                                                                               |   |                      |              |                        |                    |            |    |                     |                |   |             |            |   |             |                           |
| 3                                                | cxr2_ba4__3                                                            | Quadrant 3                                      |                                                                                                                                                                                                                                                                                                                                                               |   |                      |              |                        |                    |            |    |                     |                |   |             |            |   |             |                           |
| 4                                                | cxr2_ba4__4                                                            | Quadrant 4                                      |                                                                                                                                                                                                                                                                                                                                                               |   |                      |              |                        |                    |            |    |                     |                |   |             |            |   |             |                           |
| 0                                                | cxr2_ba4__0                                                            | No alveolar consolidation                       |                                                                                                                                                                                                                                                                                                                                                               |   |                      |              |                        |                    |            |    |                     |                |   |             |            |   |             |                           |
| 679                                              | rx_definition2_437<br>Show the field ONLY if:<br>[cxr3] = '1'          | Chest X ray definition                          | dropdown<br><table border="1"> <tr><td>1</td><td>Consistent with ARDS</td></tr> <tr><td>2</td><td>Inconsistent with ARDS</td></tr> <tr><td>0</td><td>equivocal</td></tr> </table>                                                                                                                                                                             | 1 | Consistent with ARDS | 2            | Inconsistent with ARDS | 0                  | equivocal  |    |                     |                |   |             |            |   |             |                           |
| 1                                                | Consistent with ARDS                                                   |                                                 |                                                                                                                                                                                                                                                                                                                                                               |   |                      |              |                        |                    |            |    |                     |                |   |             |            |   |             |                           |
| 2                                                | Inconsistent with ARDS                                                 |                                                 |                                                                                                                                                                                                                                                                                                                                                               |   |                      |              |                        |                    |            |    |                     |                |   |             |            |   |             |                           |
| 0                                                | equivocal                                                              |                                                 |                                                                                                                                                                                                                                                                                                                                                               |   |                      |              |                        |                    |            |    |                     |                |   |             |            |   |             |                           |

|     |                                                               |                                    |                                                                                                                                                                                                                                                                                                                                                               |   |                      |            |                        |             |            |   |             |            |   |             |            |   |             |                           |
|-----|---------------------------------------------------------------|------------------------------------|---------------------------------------------------------------------------------------------------------------------------------------------------------------------------------------------------------------------------------------------------------------------------------------------------------------------------------------------------------------|---|----------------------|------------|------------------------|-------------|------------|---|-------------|------------|---|-------------|------------|---|-------------|---------------------------|
| 680 | cxr4                                                          | Is there another X Ray?            | dropdown<br><table border="1"> <tr><td>1</td><td>Yes</td></tr> <tr><td>0</td><td>No</td></tr> </table>                                                                                                                                                                                                                                                        | 1 | Yes                  | 0          | No                     |             |            |   |             |            |   |             |            |   |             |                           |
| 1   | Yes                                                           |                                    |                                                                                                                                                                                                                                                                                                                                                               |   |                      |            |                        |             |            |   |             |            |   |             |            |   |             |                           |
| 0   | No                                                            |                                    |                                                                                                                                                                                                                                                                                                                                                               |   |                      |            |                        |             |            |   |             |            |   |             |            |   |             |                           |
| 681 | cxr_date2_9de<br>Show the field ONLY if:<br>[cxr4] = '1'      | CXR date                           | text (date_mdy)                                                                                                                                                                                                                                                                                                                                               |   |                      |            |                        |             |            |   |             |            |   |             |            |   |             |                           |
| 682 | cxr2_07f<br>Show the field ONLY if:<br>[cxr4] = '1'           | Chest X ray alveolar consolidation | checkbox<br><table border="1"> <tr><td>1</td><td>cxr2_07f__1</td><td>Quadrant 1</td></tr> <tr><td>2</td><td>cxr2_07f__2</td><td>Quadrant 2</td></tr> <tr><td>3</td><td>cxr2_07f__3</td><td>Quadrant 3</td></tr> <tr><td>4</td><td>cxr2_07f__4</td><td>Quadrant 4</td></tr> <tr><td>0</td><td>cxr2_07f__0</td><td>No alveolar consolidation</td></tr> </table> | 1 | cxr2_07f__1          | Quadrant 1 | 2                      | cxr2_07f__2 | Quadrant 2 | 3 | cxr2_07f__3 | Quadrant 3 | 4 | cxr2_07f__4 | Quadrant 4 | 0 | cxr2_07f__0 | No alveolar consolidation |
| 1   | cxr2_07f__1                                                   | Quadrant 1                         |                                                                                                                                                                                                                                                                                                                                                               |   |                      |            |                        |             |            |   |             |            |   |             |            |   |             |                           |
| 2   | cxr2_07f__2                                                   | Quadrant 2                         |                                                                                                                                                                                                                                                                                                                                                               |   |                      |            |                        |             |            |   |             |            |   |             |            |   |             |                           |
| 3   | cxr2_07f__3                                                   | Quadrant 3                         |                                                                                                                                                                                                                                                                                                                                                               |   |                      |            |                        |             |            |   |             |            |   |             |            |   |             |                           |
| 4   | cxr2_07f__4                                                   | Quadrant 4                         |                                                                                                                                                                                                                                                                                                                                                               |   |                      |            |                        |             |            |   |             |            |   |             |            |   |             |                           |
| 0   | cxr2_07f__0                                                   | No alveolar consolidation          |                                                                                                                                                                                                                                                                                                                                                               |   |                      |            |                        |             |            |   |             |            |   |             |            |   |             |                           |
| 683 | rx_definition2_4f8<br>Show the field ONLY if:<br>[cxr4] = '1' | Chest X ray definition             | dropdown<br><table border="1"> <tr><td>1</td><td>Consistent with ARDS</td></tr> <tr><td>2</td><td>Inconsistent with ARDS</td></tr> <tr><td>0</td><td>equivocal</td></tr> </table>                                                                                                                                                                             | 1 | Consistent with ARDS | 2          | Inconsistent with ARDS | 0           | equivocal  |   |             |            |   |             |            |   |             |                           |
| 1   | Consistent with ARDS                                          |                                    |                                                                                                                                                                                                                                                                                                                                                               |   |                      |            |                        |             |            |   |             |            |   |             |            |   |             |                           |
| 2   | Inconsistent with ARDS                                        |                                    |                                                                                                                                                                                                                                                                                                                                                               |   |                      |            |                        |             |            |   |             |            |   |             |            |   |             |                           |
| 0   | equivocal                                                     |                                    |                                                                                                                                                                                                                                                                                                                                                               |   |                      |            |                        |             |            |   |             |            |   |             |            |   |             |                           |
| 684 | cxr5                                                          | Is there another X Ray?            | dropdown<br><table border="1"> <tr><td>1</td><td>Yes</td></tr> <tr><td>0</td><td>No</td></tr> </table>                                                                                                                                                                                                                                                        | 1 | Yes                  | 0          | No                     |             |            |   |             |            |   |             |            |   |             |                           |
| 1   | Yes                                                           |                                    |                                                                                                                                                                                                                                                                                                                                                               |   |                      |            |                        |             |            |   |             |            |   |             |            |   |             |                           |
| 0   | No                                                            |                                    |                                                                                                                                                                                                                                                                                                                                                               |   |                      |            |                        |             |            |   |             |            |   |             |            |   |             |                           |
| 685 | cxr_date2_4b9<br>Show the field ONLY if:<br>[cxr5] = '1'      | CXR date                           | text (date_mdy)                                                                                                                                                                                                                                                                                                                                               |   |                      |            |                        |             |            |   |             |            |   |             |            |   |             |                           |
| 686 | cxr2_22c<br>Show the field ONLY if:<br>[cxr5] = '1'           | Chest X ray alveolar consolidation | checkbox<br><table border="1"> <tr><td>1</td><td>cxr2_22c__1</td><td>Quadrant 1</td></tr> <tr><td>2</td><td>cxr2_22c__2</td><td>Quadrant 2</td></tr> <tr><td>3</td><td>cxr2_22c__3</td><td>Quadrant 3</td></tr> <tr><td>4</td><td>cxr2_22c__4</td><td>Quadrant 4</td></tr> <tr><td>0</td><td>cxr2_22c__0</td><td>No alveolar consolidation</td></tr> </table> | 1 | cxr2_22c__1          | Quadrant 1 | 2                      | cxr2_22c__2 | Quadrant 2 | 3 | cxr2_22c__3 | Quadrant 3 | 4 | cxr2_22c__4 | Quadrant 4 | 0 | cxr2_22c__0 | No alveolar consolidation |
| 1   | cxr2_22c__1                                                   | Quadrant 1                         |                                                                                                                                                                                                                                                                                                                                                               |   |                      |            |                        |             |            |   |             |            |   |             |            |   |             |                           |
| 2   | cxr2_22c__2                                                   | Quadrant 2                         |                                                                                                                                                                                                                                                                                                                                                               |   |                      |            |                        |             |            |   |             |            |   |             |            |   |             |                           |
| 3   | cxr2_22c__3                                                   | Quadrant 3                         |                                                                                                                                                                                                                                                                                                                                                               |   |                      |            |                        |             |            |   |             |            |   |             |            |   |             |                           |
| 4   | cxr2_22c__4                                                   | Quadrant 4                         |                                                                                                                                                                                                                                                                                                                                                               |   |                      |            |                        |             |            |   |             |            |   |             |            |   |             |                           |
| 0   | cxr2_22c__0                                                   | No alveolar consolidation          |                                                                                                                                                                                                                                                                                                                                                               |   |                      |            |                        |             |            |   |             |            |   |             |            |   |             |                           |
| 687 | rx_definition2_f55<br>Show the field ONLY if:<br>[cxr5] = '1' | Chest X ray definition             | dropdown<br><table border="1"> <tr><td>1</td><td>Consistent with ARDS</td></tr> <tr><td>2</td><td>Inconsistent with ARDS</td></tr> <tr><td>0</td><td>equivocal</td></tr> </table>                                                                                                                                                                             | 1 | Consistent with ARDS | 2          | Inconsistent with ARDS | 0           | equivocal  |   |             |            |   |             |            |   |             |                           |
| 1   | Consistent with ARDS                                          |                                    |                                                                                                                                                                                                                                                                                                                                                               |   |                      |            |                        |             |            |   |             |            |   |             |            |   |             |                           |
| 2   | Inconsistent with ARDS                                        |                                    |                                                                                                                                                                                                                                                                                                                                                               |   |                      |            |                        |             |            |   |             |            |   |             |            |   |             |                           |
| 0   | equivocal                                                     |                                    |                                                                                                                                                                                                                                                                                                                                                               |   |                      |            |                        |             |            |   |             |            |   |             |            |   |             |                           |
| 688 | cxr6                                                          | Is there another X Ray?            | dropdown<br><table border="1"> <tr><td>1</td><td>Yes</td></tr> <tr><td>0</td><td>No</td></tr> </table>                                                                                                                                                                                                                                                        | 1 | Yes                  | 0          | No                     |             |            |   |             |            |   |             |            |   |             |                           |
| 1   | Yes                                                           |                                    |                                                                                                                                                                                                                                                                                                                                                               |   |                      |            |                        |             |            |   |             |            |   |             |            |   |             |                           |
| 0   | No                                                            |                                    |                                                                                                                                                                                                                                                                                                                                                               |   |                      |            |                        |             |            |   |             |            |   |             |            |   |             |                           |
| 689 | cxr_date2_ee9<br>Show the field ONLY if:<br>[cxr5] = '1'      | CXR date                           | text (date_mdy)                                                                                                                                                                                                                                                                                                                                               |   |                      |            |                        |             |            |   |             |            |   |             |            |   |             |                           |
| 690 | cxr2_f43<br>Show the field ONLY if:<br>[cxr5] = '1'           | Chest X ray alveolar consolidation | checkbox<br><table border="1"> <tr><td>1</td><td>cxr2_f43__1</td><td>Quadrant 1</td></tr> <tr><td>2</td><td>cxr2_f43__2</td><td>Quadrant 2</td></tr> <tr><td>3</td><td>cxr2_f43__3</td><td>Quadrant 3</td></tr> <tr><td>4</td><td>cxr2_f43__4</td><td>Quadrant 4</td></tr> <tr><td>0</td><td>cxr2_f43__0</td><td>No alveolar consolidation</td></tr> </table> | 1 | cxr2_f43__1          | Quadrant 1 | 2                      | cxr2_f43__2 | Quadrant 2 | 3 | cxr2_f43__3 | Quadrant 3 | 4 | cxr2_f43__4 | Quadrant 4 | 0 | cxr2_f43__0 | No alveolar consolidation |
| 1   | cxr2_f43__1                                                   | Quadrant 1                         |                                                                                                                                                                                                                                                                                                                                                               |   |                      |            |                        |             |            |   |             |            |   |             |            |   |             |                           |
| 2   | cxr2_f43__2                                                   | Quadrant 2                         |                                                                                                                                                                                                                                                                                                                                                               |   |                      |            |                        |             |            |   |             |            |   |             |            |   |             |                           |
| 3   | cxr2_f43__3                                                   | Quadrant 3                         |                                                                                                                                                                                                                                                                                                                                                               |   |                      |            |                        |             |            |   |             |            |   |             |            |   |             |                           |
| 4   | cxr2_f43__4                                                   | Quadrant 4                         |                                                                                                                                                                                                                                                                                                                                                               |   |                      |            |                        |             |            |   |             |            |   |             |            |   |             |                           |
| 0   | cxr2_f43__0                                                   | No alveolar consolidation          |                                                                                                                                                                                                                                                                                                                                                               |   |                      |            |                        |             |            |   |             |            |   |             |            |   |             |                           |
| 691 | rx_definition2_091<br>Show the field ONLY if:<br>[cxr5] = '1' | Chest X ray definition             | dropdown<br><table border="1"> <tr><td>1</td><td>Consistent with ARDS</td></tr> <tr><td>2</td><td>Inconsistent with ARDS</td></tr> <tr><td>0</td><td>equivocal</td></tr> </table>                                                                                                                                                                             | 1 | Consistent with ARDS | 2          | Inconsistent with ARDS | 0           | equivocal  |   |             |            |   |             |            |   |             |                           |
| 1   | Consistent with ARDS                                          |                                    |                                                                                                                                                                                                                                                                                                                                                               |   |                      |            |                        |             |            |   |             |            |   |             |            |   |             |                           |
| 2   | Inconsistent with ARDS                                        |                                    |                                                                                                                                                                                                                                                                                                                                                               |   |                      |            |                        |             |            |   |             |            |   |             |            |   |             |                           |
| 0   | equivocal                                                     |                                    |                                                                                                                                                                                                                                                                                                                                                               |   |                      |            |                        |             |            |   |             |            |   |             |            |   |             |                           |
| 692 | cxr7                                                          | Is there another X Ray?            | dropdown<br><table border="1"> <tr><td>1</td><td>Yes</td></tr> <tr><td>0</td><td>No</td></tr> </table>                                                                                                                                                                                                                                                        | 1 | Yes                  | 0          | No                     |             |            |   |             |            |   |             |            |   |             |                           |
| 1   | Yes                                                           |                                    |                                                                                                                                                                                                                                                                                                                                                               |   |                      |            |                        |             |            |   |             |            |   |             |            |   |             |                           |
| 0   | No                                                            |                                    |                                                                                                                                                                                                                                                                                                                                                               |   |                      |            |                        |             |            |   |             |            |   |             |            |   |             |                           |
| 693 | cxr_date2_ed2<br>Show the field ONLY if:<br>[cxr6] = '1'      | CXR date                           | text (date_mdy)                                                                                                                                                                                                                                                                                                                                               |   |                      |            |                        |             |            |   |             |            |   |             |            |   |             |                           |

|     |                                                               |                                    |                                                                                                                                                                                                                                                                                                                                                               |   |                      |            |                        |             |            |   |             |            |   |             |            |   |             |                           |
|-----|---------------------------------------------------------------|------------------------------------|---------------------------------------------------------------------------------------------------------------------------------------------------------------------------------------------------------------------------------------------------------------------------------------------------------------------------------------------------------------|---|----------------------|------------|------------------------|-------------|------------|---|-------------|------------|---|-------------|------------|---|-------------|---------------------------|
| 694 | cxr2_78d<br>Show the field ONLY if:<br>[cxr6] = '1'           | Chest X ray alveolar consolidation | checkbox<br><table border="1"> <tr><td>1</td><td>cxr2_78d__1</td><td>Quadrant 1</td></tr> <tr><td>2</td><td>cxr2_78d__2</td><td>Quadrant 2</td></tr> <tr><td>3</td><td>cxr2_78d__3</td><td>Quadrant 3</td></tr> <tr><td>4</td><td>cxr2_78d__4</td><td>Quadrant 4</td></tr> <tr><td>0</td><td>cxr2_78d__0</td><td>No alveolar consolidation</td></tr> </table> | 1 | cxr2_78d__1          | Quadrant 1 | 2                      | cxr2_78d__2 | Quadrant 2 | 3 | cxr2_78d__3 | Quadrant 3 | 4 | cxr2_78d__4 | Quadrant 4 | 0 | cxr2_78d__0 | No alveolar consolidation |
| 1   | cxr2_78d__1                                                   | Quadrant 1                         |                                                                                                                                                                                                                                                                                                                                                               |   |                      |            |                        |             |            |   |             |            |   |             |            |   |             |                           |
| 2   | cxr2_78d__2                                                   | Quadrant 2                         |                                                                                                                                                                                                                                                                                                                                                               |   |                      |            |                        |             |            |   |             |            |   |             |            |   |             |                           |
| 3   | cxr2_78d__3                                                   | Quadrant 3                         |                                                                                                                                                                                                                                                                                                                                                               |   |                      |            |                        |             |            |   |             |            |   |             |            |   |             |                           |
| 4   | cxr2_78d__4                                                   | Quadrant 4                         |                                                                                                                                                                                                                                                                                                                                                               |   |                      |            |                        |             |            |   |             |            |   |             |            |   |             |                           |
| 0   | cxr2_78d__0                                                   | No alveolar consolidation          |                                                                                                                                                                                                                                                                                                                                                               |   |                      |            |                        |             |            |   |             |            |   |             |            |   |             |                           |
| 695 | rx_definition2_3b4<br>Show the field ONLY if:<br>[cxr6] = '1' | Chest X ray definition             | dropdown<br><table border="1"> <tr><td>1</td><td>Consistent with ARDS</td></tr> <tr><td>2</td><td>Inconsistent with ARDS</td></tr> <tr><td>0</td><td>equivocal</td></tr> </table>                                                                                                                                                                             | 1 | Consistent with ARDS | 2          | Inconsistent with ARDS | 0           | equivocal  |   |             |            |   |             |            |   |             |                           |
| 1   | Consistent with ARDS                                          |                                    |                                                                                                                                                                                                                                                                                                                                                               |   |                      |            |                        |             |            |   |             |            |   |             |            |   |             |                           |
| 2   | Inconsistent with ARDS                                        |                                    |                                                                                                                                                                                                                                                                                                                                                               |   |                      |            |                        |             |            |   |             |            |   |             |            |   |             |                           |
| 0   | equivocal                                                     |                                    |                                                                                                                                                                                                                                                                                                                                                               |   |                      |            |                        |             |            |   |             |            |   |             |            |   |             |                           |
| 696 | cxr8                                                          | Is there another X Ray?            | dropdown<br><table border="1"> <tr><td>1</td><td>Yes</td></tr> <tr><td>0</td><td>No</td></tr> </table>                                                                                                                                                                                                                                                        | 1 | Yes                  | 0          | No                     |             |            |   |             |            |   |             |            |   |             |                           |
| 1   | Yes                                                           |                                    |                                                                                                                                                                                                                                                                                                                                                               |   |                      |            |                        |             |            |   |             |            |   |             |            |   |             |                           |
| 0   | No                                                            |                                    |                                                                                                                                                                                                                                                                                                                                                               |   |                      |            |                        |             |            |   |             |            |   |             |            |   |             |                           |
| 697 | cxr_date2_e56<br>Show the field ONLY if:<br>[cxr8] = '1'      | CXR date                           | text (date_mdy)                                                                                                                                                                                                                                                                                                                                               |   |                      |            |                        |             |            |   |             |            |   |             |            |   |             |                           |
| 698 | cxr2_ffc<br>Show the field ONLY if:<br>[cxr8] = '1'           | Chest X ray alveolar consolidation | checkbox<br><table border="1"> <tr><td>1</td><td>cxr2_ffc__1</td><td>Quadrant 1</td></tr> <tr><td>2</td><td>cxr2_ffc__2</td><td>Quadrant 2</td></tr> <tr><td>3</td><td>cxr2_ffc__3</td><td>Quadrant 3</td></tr> <tr><td>4</td><td>cxr2_ffc__4</td><td>Quadrant 4</td></tr> <tr><td>0</td><td>cxr2_ffc__0</td><td>No alveolar consolidation</td></tr> </table> | 1 | cxr2_ffc__1          | Quadrant 1 | 2                      | cxr2_ffc__2 | Quadrant 2 | 3 | cxr2_ffc__3 | Quadrant 3 | 4 | cxr2_ffc__4 | Quadrant 4 | 0 | cxr2_ffc__0 | No alveolar consolidation |
| 1   | cxr2_ffc__1                                                   | Quadrant 1                         |                                                                                                                                                                                                                                                                                                                                                               |   |                      |            |                        |             |            |   |             |            |   |             |            |   |             |                           |
| 2   | cxr2_ffc__2                                                   | Quadrant 2                         |                                                                                                                                                                                                                                                                                                                                                               |   |                      |            |                        |             |            |   |             |            |   |             |            |   |             |                           |
| 3   | cxr2_ffc__3                                                   | Quadrant 3                         |                                                                                                                                                                                                                                                                                                                                                               |   |                      |            |                        |             |            |   |             |            |   |             |            |   |             |                           |
| 4   | cxr2_ffc__4                                                   | Quadrant 4                         |                                                                                                                                                                                                                                                                                                                                                               |   |                      |            |                        |             |            |   |             |            |   |             |            |   |             |                           |
| 0   | cxr2_ffc__0                                                   | No alveolar consolidation          |                                                                                                                                                                                                                                                                                                                                                               |   |                      |            |                        |             |            |   |             |            |   |             |            |   |             |                           |
| 699 | rx_definition2_75a<br>Show the field ONLY if:<br>[cxr8] = '1' | Chest X ray definition             | dropdown<br><table border="1"> <tr><td>1</td><td>Consistent with ARDS</td></tr> <tr><td>2</td><td>Inconsistent with ARDS</td></tr> <tr><td>0</td><td>equivocal</td></tr> </table>                                                                                                                                                                             | 1 | Consistent with ARDS | 2          | Inconsistent with ARDS | 0           | equivocal  |   |             |            |   |             |            |   |             |                           |
| 1   | Consistent with ARDS                                          |                                    |                                                                                                                                                                                                                                                                                                                                                               |   |                      |            |                        |             |            |   |             |            |   |             |            |   |             |                           |
| 2   | Inconsistent with ARDS                                        |                                    |                                                                                                                                                                                                                                                                                                                                                               |   |                      |            |                        |             |            |   |             |            |   |             |            |   |             |                           |
| 0   | equivocal                                                     |                                    |                                                                                                                                                                                                                                                                                                                                                               |   |                      |            |                        |             |            |   |             |            |   |             |            |   |             |                           |
| 700 | cxr9                                                          | Is there another X Ray?            | dropdown<br><table border="1"> <tr><td>1</td><td>Yes</td></tr> <tr><td>0</td><td>No</td></tr> </table>                                                                                                                                                                                                                                                        | 1 | Yes                  | 0          | No                     |             |            |   |             |            |   |             |            |   |             |                           |
| 1   | Yes                                                           |                                    |                                                                                                                                                                                                                                                                                                                                                               |   |                      |            |                        |             |            |   |             |            |   |             |            |   |             |                           |
| 0   | No                                                            |                                    |                                                                                                                                                                                                                                                                                                                                                               |   |                      |            |                        |             |            |   |             |            |   |             |            |   |             |                           |
| 701 | cxr_date2_8a6<br>Show the field ONLY if:<br>[cxr9] = '1'      | CXR date                           | text (date_mdy)                                                                                                                                                                                                                                                                                                                                               |   |                      |            |                        |             |            |   |             |            |   |             |            |   |             |                           |
| 702 | cxr2_bbe<br>Show the field ONLY if:<br>[cxr9] = '1'           | Chest X ray alveolar consolidation | checkbox<br><table border="1"> <tr><td>1</td><td>cxr2_bbe__1</td><td>Quadrant 1</td></tr> <tr><td>2</td><td>cxr2_bbe__2</td><td>Quadrant 2</td></tr> <tr><td>3</td><td>cxr2_bbe__3</td><td>Quadrant 3</td></tr> <tr><td>4</td><td>cxr2_bbe__4</td><td>Quadrant 4</td></tr> <tr><td>0</td><td>cxr2_bbe__0</td><td>No alveolar consolidation</td></tr> </table> | 1 | cxr2_bbe__1          | Quadrant 1 | 2                      | cxr2_bbe__2 | Quadrant 2 | 3 | cxr2_bbe__3 | Quadrant 3 | 4 | cxr2_bbe__4 | Quadrant 4 | 0 | cxr2_bbe__0 | No alveolar consolidation |
| 1   | cxr2_bbe__1                                                   | Quadrant 1                         |                                                                                                                                                                                                                                                                                                                                                               |   |                      |            |                        |             |            |   |             |            |   |             |            |   |             |                           |
| 2   | cxr2_bbe__2                                                   | Quadrant 2                         |                                                                                                                                                                                                                                                                                                                                                               |   |                      |            |                        |             |            |   |             |            |   |             |            |   |             |                           |
| 3   | cxr2_bbe__3                                                   | Quadrant 3                         |                                                                                                                                                                                                                                                                                                                                                               |   |                      |            |                        |             |            |   |             |            |   |             |            |   |             |                           |
| 4   | cxr2_bbe__4                                                   | Quadrant 4                         |                                                                                                                                                                                                                                                                                                                                                               |   |                      |            |                        |             |            |   |             |            |   |             |            |   |             |                           |
| 0   | cxr2_bbe__0                                                   | No alveolar consolidation          |                                                                                                                                                                                                                                                                                                                                                               |   |                      |            |                        |             |            |   |             |            |   |             |            |   |             |                           |
| 703 | rx_definition2_e34<br>Show the field ONLY if:<br>[cxr9] = '1' | Chest X ray definition             | dropdown<br><table border="1"> <tr><td>1</td><td>Consistent with ARDS</td></tr> <tr><td>2</td><td>Inconsistent with ARDS</td></tr> <tr><td>0</td><td>equivocal</td></tr> </table>                                                                                                                                                                             | 1 | Consistent with ARDS | 2          | Inconsistent with ARDS | 0           | equivocal  |   |             |            |   |             |            |   |             |                           |
| 1   | Consistent with ARDS                                          |                                    |                                                                                                                                                                                                                                                                                                                                                               |   |                      |            |                        |             |            |   |             |            |   |             |            |   |             |                           |
| 2   | Inconsistent with ARDS                                        |                                    |                                                                                                                                                                                                                                                                                                                                                               |   |                      |            |                        |             |            |   |             |            |   |             |            |   |             |                           |
| 0   | equivocal                                                     |                                    |                                                                                                                                                                                                                                                                                                                                                               |   |                      |            |                        |             |            |   |             |            |   |             |            |   |             |                           |
| 704 | cxr10                                                         | Is there another X Ray?            | dropdown<br><table border="1"> <tr><td>1</td><td>Yes</td></tr> <tr><td>0</td><td>No</td></tr> </table>                                                                                                                                                                                                                                                        | 1 | Yes                  | 0          | No                     |             |            |   |             |            |   |             |            |   |             |                           |
| 1   | Yes                                                           |                                    |                                                                                                                                                                                                                                                                                                                                                               |   |                      |            |                        |             |            |   |             |            |   |             |            |   |             |                           |
| 0   | No                                                            |                                    |                                                                                                                                                                                                                                                                                                                                                               |   |                      |            |                        |             |            |   |             |            |   |             |            |   |             |                           |
| 705 | cxr_date2_c4f<br>Show the field ONLY if:<br>[cxr10] = '1'     | CXR date                           | text (date_mdy)                                                                                                                                                                                                                                                                                                                                               |   |                      |            |                        |             |            |   |             |            |   |             |            |   |             |                           |
| 706 | cxr2_6a2<br>Show the field ONLY if:<br>[cxr10] = '1'          | Chest X ray alveolar consolidation | checkbox<br><table border="1"> <tr><td>1</td><td>cxr2_6a2__1</td><td>Quadrant 1</td></tr> <tr><td>2</td><td>cxr2_6a2__2</td><td>Quadrant 2</td></tr> <tr><td>3</td><td>cxr2_6a2__3</td><td>Quadrant 3</td></tr> <tr><td>4</td><td>cxr2_6a2__4</td><td>Quadrant 4</td></tr> <tr><td>0</td><td>cxr2_6a2__0</td><td>No alveolar consolidation</td></tr> </table> | 1 | cxr2_6a2__1          | Quadrant 1 | 2                      | cxr2_6a2__2 | Quadrant 2 | 3 | cxr2_6a2__3 | Quadrant 3 | 4 | cxr2_6a2__4 | Quadrant 4 | 0 | cxr2_6a2__0 | No alveolar consolidation |
| 1   | cxr2_6a2__1                                                   | Quadrant 1                         |                                                                                                                                                                                                                                                                                                                                                               |   |                      |            |                        |             |            |   |             |            |   |             |            |   |             |                           |
| 2   | cxr2_6a2__2                                                   | Quadrant 2                         |                                                                                                                                                                                                                                                                                                                                                               |   |                      |            |                        |             |            |   |             |            |   |             |            |   |             |                           |
| 3   | cxr2_6a2__3                                                   | Quadrant 3                         |                                                                                                                                                                                                                                                                                                                                                               |   |                      |            |                        |             |            |   |             |            |   |             |            |   |             |                           |
| 4   | cxr2_6a2__4                                                   | Quadrant 4                         |                                                                                                                                                                                                                                                                                                                                                               |   |                      |            |                        |             |            |   |             |            |   |             |            |   |             |                           |
| 0   | cxr2_6a2__0                                                   | No alveolar consolidation          |                                                                                                                                                                                                                                                                                                                                                               |   |                      |            |                        |             |            |   |             |            |   |             |            |   |             |                           |

|                                                      |                                                                      |                                                                                                                                     |                                                                                                                                                                                                     |
|------------------------------------------------------|----------------------------------------------------------------------|-------------------------------------------------------------------------------------------------------------------------------------|-----------------------------------------------------------------------------------------------------------------------------------------------------------------------------------------------------|
| 707                                                  | rx_definition2_5e0<br>Show the field ONLY if:<br>[cxr10] = '1'       | Chest X ray definition                                                                                                              | dropdown<br>1 Consistent with ARDS<br>2 Inconsistent with ARDS<br>0 equivocal                                                                                                                       |
| 708                                                  | ct_date<br>Show the field ONLY if:<br>[type_of_imaging(2)] = '1'     | CT scan date                                                                                                                        | text (date_mdy)                                                                                                                                                                                     |
| 709                                                  | ct_findings<br>Show the field ONLY if:<br>[type_of_imaging(2)] = '1' | CT findings                                                                                                                         | checkbox<br>1 ct_findings__1 Severe atelectasis<br>2 ct_findings__2 Alveolar consolidation<br>3 ct_findings__3 Pleural effusion<br>4 ct_findings__4 Pulmonary embolism<br>0 ct_findings__0 Other    |
| 710                                                  | chest_imaging_complete                                               | Section Header: <i>Form Status</i><br>Complete?                                                                                     | dropdown<br>0 Incomplete<br>1 Unverified<br>2 Complete                                                                                                                                              |
| Instrument: <b>Final Diagnosis</b> (final_diagnosis) |                                                                      |                                                                                                                                     |                                                                                                                                                                                                     |
| 711                                                  | final_dx_date                                                        | Date                                                                                                                                | text (date_mdy)                                                                                                                                                                                     |
| 712                                                  | reviewer                                                             | Reviewer                                                                                                                            | text                                                                                                                                                                                                |
| 713                                                  | final_sirs                                                           | Upon final review does/did the patient have SIRS?                                                                                   | dropdown<br>1 Yes<br>0 No                                                                                                                                                                           |
| 714                                                  | sepsis_final_dx                                                      | Upon final review does/did the patient have Sepsis?                                                                                 | dropdown<br>1 Yes<br>0 No                                                                                                                                                                           |
| 715                                                  | ards_final_dx                                                        | Upon final review does/did the patient have ARDS?                                                                                   | dropdown<br>1 Yes<br>0 No                                                                                                                                                                           |
| 716                                                  | final_diagnosis_complete                                             | Section Header: <i>Form Status</i><br>Complete?                                                                                     | dropdown<br>0 Incomplete<br>1 Unverified<br>2 Complete                                                                                                                                              |
| Instrument: <b>Outcome</b> (outcome)                 |                                                                      |                                                                                                                                     |                                                                                                                                                                                                     |
| 717                                                  | discharge_date                                                       | Date of discharge:                                                                                                                  | text                                                                                                                                                                                                |
| 718                                                  | status                                                               | Status at discharge                                                                                                                 | dropdown<br>1 Dead<br>2 Alive                                                                                                                                                                       |
| 719                                                  | death_date                                                           | Date of death                                                                                                                       | text                                                                                                                                                                                                |
| 720                                                  | death_cause                                                          | Cause of death                                                                                                                      | dropdown<br>1 Primary admission diagnosis<br>2 Complication of primary admission diagnosis<br>3 Unrelated to primary admission diagnosis<br>4 Unknown.                                              |
| 721                                                  | place_discharge<br>Show the field ONLY if:<br>[status] = '2'         | Discharged to?                                                                                                                      | dropdown<br>1 Home<br>2 Outside hospital<br>3 Non-Vent Health-care facility (e.g., nursing home or rehab)<br>4 Long Term Acute Care (e.g., Vent Facility)<br>5 Hospice Facility<br>0 Not Applicable |
| 722                                                  | duration_ventilation                                                 | Duration on mechanical ventilation (days)<br><i>Please record the duration of mechanical ventilation in the first ICU admission</i> | text                                                                                                                                                                                                |



|                                                        |                                                                              |                                                                                                                                                                                               |                                                        |
|--------------------------------------------------------|------------------------------------------------------------------------------|-----------------------------------------------------------------------------------------------------------------------------------------------------------------------------------------------|--------------------------------------------------------|
| 723                                                    | days_icu                                                                     | Duration of first ICU admission (days)                                                                                                                                                        | text                                                   |
| 724                                                    | ventilator_free_days                                                         | Ventilator free days<br><i>Number of days from day 1 to day 28 on which a patient breathed without assistance, if the period of unassisted breathing lasted at least 48 consecutive hours</i> | calc<br>Calculation: 28-[duration_ventilation]         |
| 725                                                    | icu_free                                                                     | ICU free days<br><i>Until 28th day of follow up</i>                                                                                                                                           | calc<br>Calculation: 28-[days_icu]                     |
| 726                                                    | antibioticstotal                                                             | Section Header: <i>Antibiotics</i><br>Was the patient started on antibiotics?                                                                                                                 | dropdown<br>1 Yes<br>0 No                              |
| 727                                                    | date_ab_total<br>Show the field ONLY if:<br>[antibioticstotal] = '1'         | Date of first administration of antibiotics                                                                                                                                                   | text (date_mdy)                                        |
| 728                                                    | time_ab_total<br>Show the field ONLY if:<br>[antibioticstotal] = '1'         | Time of first administration of antibiotics                                                                                                                                                   | text (time)                                            |
| 729                                                    | date_final_ab<br>Show the field ONLY if:<br>[antibioticstotal] = '1'         | Date of final dose of antibiotics                                                                                                                                                             | text (date_mdy)                                        |
| 730                                                    | cardiovascular_failure                                                       | Section Header: <i>Organ Failure Free days (14 total)</i><br><b>Cardiovascular</b><br><i>Organ failure defined as systolic blood pressure equal or less than 90mmhg not fluid responsive.</i> | text                                                   |
| 731                                                    | pulmonary_failure                                                            | <b>Pulmonary</b><br><i>Organ failure defined as PaO2/FiO2 equal or less than 300</i>                                                                                                          | text                                                   |
| 732                                                    | cns                                                                          | <b>Central Nervous System</b><br><i>Organ failure defined as Glasgow coma score equal or less than 12</i>                                                                                     | text                                                   |
| 733                                                    | coagulation                                                                  | <b>Coagulation</b><br><i>Organ failure defined as platelets equal or less than 80,000</i>                                                                                                     | text                                                   |
| 734                                                    | renal                                                                        | <b>Renal</b><br><i>Organ failure defined as creatinine equal or greater than 2.0</i>                                                                                                          | text                                                   |
| 735                                                    | hepatic                                                                      | <b>Hepatic</b><br><i>Organ failure defined as bilirubin equal or greater than 2.0</i>                                                                                                         | text                                                   |
| 736                                                    | total_free_days                                                              | Days free of all organ failure                                                                                                                                                                | text                                                   |
| 737                                                    | new_dialysis                                                                 | Section Header: <i>Dyalisis</i><br>New dialysis during this hospitalization?                                                                                                                  | dropdown<br>1 Yes<br>0 No<br>88 Unkown                 |
| 738                                                    | dialysis_day<br>Show the field ONLY if:<br>[new_dialysis] = '1'              | Day 1 of dialysis                                                                                                                                                                             | text (date_mdy)                                        |
| 739                                                    | continuing_dialysis<br>Show the field ONLY if:<br>[new_dialysis] = '1'       | Continuing dialysis at discharge?                                                                                                                                                             | dropdown<br>1 Yes<br>0 No                              |
| 740                                                    | date_dialysis_last<br>Show the field ONLY if:<br>[continuing_dialysis] = '0' | Date of last dialysis                                                                                                                                                                         | text (date_mdy)                                        |
| 741                                                    | creatinine_last                                                              | Last creatinine before discharge                                                                                                                                                              | text                                                   |
| 742                                                    | day_mortality                                                                | Section Header: <i>Medium and long term mortality</i><br>Death at 28 days of discharge?                                                                                                       | dropdown<br>1 Yes<br>0 No                              |
| 743                                                    | day_mortality60                                                              | Death at 60 days of discharge?                                                                                                                                                                | dropdown<br>1 Yes<br>0 No                              |
| 744                                                    | outcome_complete                                                             | Section Header: <i>Form Status</i><br>Complete?                                                                                                                                               | dropdown<br>0 Incomplete<br>1 Unverified<br>2 Complete |
| Instrument: <b>Blood collection</b> (blood_collection) |                                                                              |                                                                                                                                                                                               |                                                        |

|     |                                                                    |                                        |                                                                                                                                                                   |   |         |   |              |   |         |
|-----|--------------------------------------------------------------------|----------------------------------------|-------------------------------------------------------------------------------------------------------------------------------------------------------------------|---|---------|---|--------------|---|---------|
| 745 | blood_1                                                            | Was blood sample collected in day 0-1? | dropdown<br><table border="1"> <tr> <td>1</td> <td>Yes</td> </tr> <tr> <td>0</td> <td>No</td> </tr> </table>                                                      | 1 | Yes     | 0 | No           |   |         |
| 1   | Yes                                                                |                                        |                                                                                                                                                                   |   |         |   |              |   |         |
| 0   | No                                                                 |                                        |                                                                                                                                                                   |   |         |   |              |   |         |
| 746 | date_collect1<br>Show the field ONLY if:<br>[blood_1] = '1'        | Date collected                         | text (date_mdy)                                                                                                                                                   |   |         |   |              |   |         |
| 747 | time_sample<br>Show the field ONLY if:<br>[blood_1] = '1'          | Time collected                         | text (time)                                                                                                                                                       |   |         |   |              |   |         |
| 748 | volume1                                                            | Volume collected (aprox) (cc)          | text                                                                                                                                                              |   |         |   |              |   |         |
| 749 | number_vials_1<br>Show the field ONLY if:<br>[blood_1] = '1'       | Total number of plasma vials           | text                                                                                                                                                              |   |         |   |              |   |         |
| 750 | code_plasma<br>Show the field ONLY if:<br>[blood_1] = '1'          | Code                                   | text                                                                                                                                                              |   |         |   |              |   |         |
| 751 | cell_susp_vials1<br>Show the field ONLY if:<br>[blood_1] = '1'     | Total number of cell suspension vials  | text                                                                                                                                                              |   |         |   |              |   |         |
| 752 | code_cellsusp<br>Show the field ONLY if:<br>[blood_1] = '1'        | Code                                   | text                                                                                                                                                              |   |         |   |              |   |         |
| 753 | site_blood_draw<br>Show the field ONLY if:<br>[blood_1] = '1'      | Site for blood draw                    | dropdown<br><table border="1"> <tr> <td>1</td> <td>IV line</td> </tr> <tr> <td>2</td> <td>Venipuncture</td> </tr> <tr> <td>3</td> <td>Unknown</td> </tr> </table> | 1 | IV line | 2 | Venipuncture | 3 | Unknown |
| 1   | IV line                                                            |                                        |                                                                                                                                                                   |   |         |   |              |   |         |
| 2   | Venipuncture                                                       |                                        |                                                                                                                                                                   |   |         |   |              |   |         |
| 3   | Unknown                                                            |                                        |                                                                                                                                                                   |   |         |   |              |   |         |
| 754 | blood_3                                                            | Was blood sample collected in day 3?   | dropdown<br><table border="1"> <tr> <td>1</td> <td>Yes</td> </tr> <tr> <td>0</td> <td>No</td> </tr> </table>                                                      | 1 | Yes     | 0 | No           |   |         |
| 1   | Yes                                                                |                                        |                                                                                                                                                                   |   |         |   |              |   |         |
| 0   | No                                                                 |                                        |                                                                                                                                                                   |   |         |   |              |   |         |
| 755 | date_collect3<br>Show the field ONLY if:<br>[blood_3] = '1'        | Date collected                         | text (date_mdy)                                                                                                                                                   |   |         |   |              |   |         |
| 756 | time_sample2_463<br>Show the field ONLY if:<br>[blood_3] = '1'     | Time collected                         | text (time)                                                                                                                                                       |   |         |   |              |   |         |
| 757 | volume12_066                                                       | Volume collected (aprox) (cc)          | text                                                                                                                                                              |   |         |   |              |   |         |
| 758 | number_vials_3<br>Show the field ONLY if:<br>[blood_3] = '1'       | Total number of plasma vials           | text                                                                                                                                                              |   |         |   |              |   |         |
| 759 | code_plasma_3<br>Show the field ONLY if:<br>[blood_3] = '1'        | Code                                   | text                                                                                                                                                              |   |         |   |              |   |         |
| 760 | cell_susp_vials3<br>Show the field ONLY if:<br>[blood_3] = '1'     | Total number of cell suspension vials  | text                                                                                                                                                              |   |         |   |              |   |         |
| 761 | code_cellsusp3<br>Show the field ONLY if:<br>[blood_3] = '1'       | Code                                   | text                                                                                                                                                              |   |         |   |              |   |         |
| 762 | site_blood_draw2_20b<br>Show the field ONLY if:<br>[blood_3] = '1' | Site for blood draw                    | dropdown<br><table border="1"> <tr> <td>1</td> <td>IV line</td> </tr> <tr> <td>2</td> <td>Venipuncture</td> </tr> <tr> <td>3</td> <td>Unknown</td> </tr> </table> | 1 | IV line | 2 | Venipuncture | 3 | Unknown |
| 1   | IV line                                                            |                                        |                                                                                                                                                                   |   |         |   |              |   |         |
| 2   | Venipuncture                                                       |                                        |                                                                                                                                                                   |   |         |   |              |   |         |
| 3   | Unknown                                                            |                                        |                                                                                                                                                                   |   |         |   |              |   |         |
| 763 | blood_7                                                            | Was blood sample collected in day 7?   | dropdown<br><table border="1"> <tr> <td>1</td> <td>Yes</td> </tr> <tr> <td>0</td> <td>No</td> </tr> </table>                                                      | 1 | Yes     | 0 | No           |   |         |
| 1   | Yes                                                                |                                        |                                                                                                                                                                   |   |         |   |              |   |         |
| 0   | No                                                                 |                                        |                                                                                                                                                                   |   |         |   |              |   |         |
| 764 | date_collect7<br>Show the field ONLY if:<br>[blood_7] = '1'        | Date collected                         | text (date_mdy)                                                                                                                                                   |   |         |   |              |   |         |

|                                                    |                                                                      |                                                                                                                                                                           |                                                                                                                                                            |   |            |   |              |    |          |
|----------------------------------------------------|----------------------------------------------------------------------|---------------------------------------------------------------------------------------------------------------------------------------------------------------------------|------------------------------------------------------------------------------------------------------------------------------------------------------------|---|------------|---|--------------|----|----------|
| 765                                                | time_sample2_4632_2ab<br>Show the field ONLY if: [blood_7] = '1'     | Time collected                                                                                                                                                            | text (time)                                                                                                                                                |   |            |   |              |    |          |
| 766                                                | volume12_0662_8fd                                                    | Volume collected (aprox) (cc)                                                                                                                                             | text                                                                                                                                                       |   |            |   |              |    |          |
| 767                                                | number_vials7<br>Show the field ONLY if: [blood_7] = '1'             | Total number of plasma vials                                                                                                                                              | text                                                                                                                                                       |   |            |   |              |    |          |
| 768                                                | code_plasma_7<br>Show the field ONLY if: [blood_7] = '1'             | Code                                                                                                                                                                      | text                                                                                                                                                       |   |            |   |              |    |          |
| 769                                                | cell_susp_vials7<br>Show the field ONLY if: [blood_7] = '1'          | Total number of cell suspension vials                                                                                                                                     | text                                                                                                                                                       |   |            |   |              |    |          |
| 770                                                | code_cell_susp7<br>Show the field ONLY if: [blood_7] = '1'           | Code                                                                                                                                                                      | text                                                                                                                                                       |   |            |   |              |    |          |
| 771                                                | site_blood_draw2_20b2_0c7<br>Show the field ONLY if: [blood_7] = '1' | Site for blood draw                                                                                                                                                       | dropdown<br><table border="1"> <tr><td>1</td><td>IV line</td></tr> <tr><td>2</td><td>Venipuncture</td></tr> <tr><td>3</td><td>Unknown</td></tr> </table>   | 1 | IV line    | 2 | Venipuncture | 3  | Unknown  |
| 1                                                  | IV line                                                              |                                                                                                                                                                           |                                                                                                                                                            |   |            |   |              |    |          |
| 2                                                  | Venipuncture                                                         |                                                                                                                                                                           |                                                                                                                                                            |   |            |   |              |    |          |
| 3                                                  | Unknown                                                              |                                                                                                                                                                           |                                                                                                                                                            |   |            |   |              |    |          |
| 772                                                | dnaisolation                                                         | Section Header: <i>DNA isolation</i><br>DNA isolation for any aliquot?                                                                                                    | dropdown<br><table border="1"> <tr><td>1</td><td>Plasma</td></tr> <tr><td>2</td><td>Cells</td></tr> <tr><td>3</td><td>No</td></tr> </table>                | 1 | Plasma     | 2 | Cells        | 3  | No       |
| 1                                                  | Plasma                                                               |                                                                                                                                                                           |                                                                                                                                                            |   |            |   |              |    |          |
| 2                                                  | Cells                                                                |                                                                                                                                                                           |                                                                                                                                                            |   |            |   |              |    |          |
| 3                                                  | No                                                                   |                                                                                                                                                                           |                                                                                                                                                            |   |            |   |              |    |          |
| 773                                                | blood_collection_complete                                            | Section Header: <i>Form Status</i><br>Complete?                                                                                                                           | dropdown<br><table border="1"> <tr><td>0</td><td>Incomplete</td></tr> <tr><td>1</td><td>Unverified</td></tr> <tr><td>2</td><td>Complete</td></tr> </table> | 0 | Incomplete | 1 | Unverified   | 2  | Complete |
| 0                                                  | Incomplete                                                           |                                                                                                                                                                           |                                                                                                                                                            |   |            |   |              |    |          |
| 1                                                  | Unverified                                                           |                                                                                                                                                                           |                                                                                                                                                            |   |            |   |              |    |          |
| 2                                                  | Complete                                                             |                                                                                                                                                                           |                                                                                                                                                            |   |            |   |              |    |          |
| Instrument: <b>Brussels table</b> (brussels_table) |                                                                      |                                                                                                                                                                           |                                                                                                                                                            |   |            |   |              |    |          |
| 774                                                | cardiovasc_day1                                                      | Section Header: <i>DAY 1</i><br><b>Cardiovascular Failure?</b><br><i>Organ failure defined as systolic blood pressure equal or less than 90mmhg not fluid responsive.</i> | dropdown<br><table border="1"> <tr><td>1</td><td>Yes</td></tr> <tr><td>0</td><td>No</td></tr> <tr><td>00</td><td>NA</td></tr> </table>                     | 1 | Yes        | 0 | No           | 00 | NA       |
| 1                                                  | Yes                                                                  |                                                                                                                                                                           |                                                                                                                                                            |   |            |   |              |    |          |
| 0                                                  | No                                                                   |                                                                                                                                                                           |                                                                                                                                                            |   |            |   |              |    |          |
| 00                                                 | NA                                                                   |                                                                                                                                                                           |                                                                                                                                                            |   |            |   |              |    |          |
| 775                                                | pulmonary_failure_day2_02b                                           | <b>Pulmonary Failure?</b><br><i>Organ failure defined as PaO2/FiO2 equal or less than 300</i>                                                                             | dropdown<br><table border="1"> <tr><td>1</td><td>Yes</td></tr> <tr><td>0</td><td>No</td></tr> <tr><td>00</td><td>NA</td></tr> </table>                     | 1 | Yes        | 0 | No           | 00 | NA       |
| 1                                                  | Yes                                                                  |                                                                                                                                                                           |                                                                                                                                                            |   |            |   |              |    |          |
| 0                                                  | No                                                                   |                                                                                                                                                                           |                                                                                                                                                            |   |            |   |              |    |          |
| 00                                                 | NA                                                                   |                                                                                                                                                                           |                                                                                                                                                            |   |            |   |              |    |          |
| 776                                                | cns_failure_day_1                                                    | <b>Central Nervous System Failure?</b><br><i>Organ failure defined as Glasgow coma score equal or less than 12</i>                                                        | dropdown<br><table border="1"> <tr><td>1</td><td>Yes</td></tr> <tr><td>0</td><td>No</td></tr> <tr><td>00</td><td>NA</td></tr> </table>                     | 1 | Yes        | 0 | No           | 00 | NA       |
| 1                                                  | Yes                                                                  |                                                                                                                                                                           |                                                                                                                                                            |   |            |   |              |    |          |
| 0                                                  | No                                                                   |                                                                                                                                                                           |                                                                                                                                                            |   |            |   |              |    |          |
| 00                                                 | NA                                                                   |                                                                                                                                                                           |                                                                                                                                                            |   |            |   |              |    |          |
| 777                                                | caogulation_failure_day_1                                            | <b>Coagulation Failure?</b><br><i>Organ failure defined as platelets equal or less than 80,000</i>                                                                        | dropdown<br><table border="1"> <tr><td>1</td><td>Yes</td></tr> <tr><td>0</td><td>No</td></tr> <tr><td>00</td><td>NA</td></tr> </table>                     | 1 | Yes        | 0 | No           | 00 | NA       |
| 1                                                  | Yes                                                                  |                                                                                                                                                                           |                                                                                                                                                            |   |            |   |              |    |          |
| 0                                                  | No                                                                   |                                                                                                                                                                           |                                                                                                                                                            |   |            |   |              |    |          |
| 00                                                 | NA                                                                   |                                                                                                                                                                           |                                                                                                                                                            |   |            |   |              |    |          |
| 778                                                | renal_failure                                                        | <b>Renal Failure?</b><br><i>Organ failure defined as creatinine equal or greater than 2.0</i>                                                                             | dropdown<br><table border="1"> <tr><td>1</td><td>Yes</td></tr> <tr><td>0</td><td>No</td></tr> <tr><td>00</td><td>NA</td></tr> </table>                     | 1 | Yes        | 0 | No           | 00 | NA       |
| 1                                                  | Yes                                                                  |                                                                                                                                                                           |                                                                                                                                                            |   |            |   |              |    |          |
| 0                                                  | No                                                                   |                                                                                                                                                                           |                                                                                                                                                            |   |            |   |              |    |          |
| 00                                                 | NA                                                                   |                                                                                                                                                                           |                                                                                                                                                            |   |            |   |              |    |          |
| 779                                                | hepatic_failure_day_1                                                | <b>Hepatic Failure?</b><br><i>Organ failure defined as bilirubin equal or greater than 2.0</i>                                                                            | dropdown<br><table border="1"> <tr><td>1</td><td>Yes</td></tr> <tr><td>0</td><td>No</td></tr> <tr><td>00</td><td>NA</td></tr> </table>                     | 1 | Yes        | 0 | No           | 00 | NA       |
| 1                                                  | Yes                                                                  |                                                                                                                                                                           |                                                                                                                                                            |   |            |   |              |    |          |
| 0                                                  | No                                                                   |                                                                                                                                                                           |                                                                                                                                                            |   |            |   |              |    |          |
| 00                                                 | NA                                                                   |                                                                                                                                                                           |                                                                                                                                                            |   |            |   |              |    |          |

|     |                            |                                                                                                                                                             |                                    |
|-----|----------------------------|-------------------------------------------------------------------------------------------------------------------------------------------------------------|------------------------------------|
| 780 | free_of_all_day_1          | Free of all organ failure?                                                                                                                                  | dropdown<br>1 Yes<br>0 No<br>00 NA |
| 781 | cardiovasc_day12_de2       | Section Header: DAY 2<br>Cardiovascular Failure?<br><i>Organ failure defined as systolic blood pressure equal or less than 90mmhg not fluid responsive.</i> | dropdown<br>1 Yes<br>0 No<br>00 NA |
| 782 | pulmonary_failure_day2_d59 | Pulmonary Failure?<br><i>Organ failure defined as PaO2/FiO2 equal or less than 300</i>                                                                      | dropdown<br>1 Yes<br>0 No<br>00 NA |
| 783 | cns_failure_day_12_97f     | Central Nervous System Failure?<br><i>Organ failure defined as Glasgow coma score equal or less than 12</i>                                                 | dropdown<br>1 Yes<br>0 No<br>00 NA |
| 784 | caogulation_failure_d2_099 | Coagulation Failure?<br><i>Organ failure defined as platelets equal or less than 80,000</i>                                                                 | dropdown<br>1 Yes<br>0 No<br>00 NA |
| 785 | renal_failure2_3a22_92_740 | Renal Failure?<br><i>Organ failure defined as creatinine equal or greater than 2.0</i>                                                                      | dropdown<br>1 Yes<br>0 No<br>00 NA |
| 786 | hepatic_failure_day_12_0a5 | Hepatic Failure?<br><i>Organ failure defined as bilirubin equal or greater than 2.0</i>                                                                     | dropdown<br>1 Yes<br>0 No<br>00 NA |
| 787 | free_of_all_day_12_c62_c4c | Free of all organ failure?                                                                                                                                  | dropdown<br>1 Yes<br>0 No<br>00 NA |
| 788 | cardiovasc_day12_9c8       | Section Header: DAY 3<br>Cardiovascular Failure?<br><i>Organ failure defined as systolic blood pressure equal or less than 90mmhg not fluid responsive.</i> | dropdown<br>1 Yes<br>0 No<br>00 NA |
| 789 | pulmonary_failure_day_1    | Pulmonary Failure?<br><i>Organ failure defined as PaO2/FiO2 equal or less than 300</i>                                                                      | dropdown<br>1 Yes<br>0 No<br>00 NA |
| 790 | cns_failure_day_12_cb0     | Central Nervous System Failure?<br><i>Organ failure defined as Glasgow coma score equal or less than 12</i>                                                 | dropdown<br>1 Yes<br>0 No<br>00 NA |
| 791 | caogulation_failure_d2_1e5 | Coagulation Failure?<br><i>Organ failure defined as platelets equal or less than 80,000</i>                                                                 | dropdown<br>1 Yes<br>0 No<br>00 NA |
| 792 | renal_failure2_3a2         | Renal Failure?<br><i>Organ failure defined as creatinine equal or greater than 2.0</i>                                                                      | dropdown<br>1 Yes<br>0 No<br>00 NA |

|     |                            |                                                                                                                                                             |                                                                                                                                        |   |     |   |    |    |    |
|-----|----------------------------|-------------------------------------------------------------------------------------------------------------------------------------------------------------|----------------------------------------------------------------------------------------------------------------------------------------|---|-----|---|----|----|----|
| 793 | hepatic_failure_day_12_bec | Hepatic Failure?<br><i>Organ failure defined as bilirubin equal or greater than 2.0</i>                                                                     | dropdown<br><table border="1"> <tr><td>1</td><td>Yes</td></tr> <tr><td>0</td><td>No</td></tr> <tr><td>00</td><td>NA</td></tr> </table> | 1 | Yes | 0 | No | 00 | NA |
| 1   | Yes                        |                                                                                                                                                             |                                                                                                                                        |   |     |   |    |    |    |
| 0   | No                         |                                                                                                                                                             |                                                                                                                                        |   |     |   |    |    |    |
| 00  | NA                         |                                                                                                                                                             |                                                                                                                                        |   |     |   |    |    |    |
| 794 | free_of_all_day_12_c64     | Free of all organ failure?                                                                                                                                  | dropdown<br><table border="1"> <tr><td>1</td><td>Yes</td></tr> <tr><td>0</td><td>No</td></tr> <tr><td>00</td><td>NA</td></tr> </table> | 1 | Yes | 0 | No | 00 | NA |
| 1   | Yes                        |                                                                                                                                                             |                                                                                                                                        |   |     |   |    |    |    |
| 0   | No                         |                                                                                                                                                             |                                                                                                                                        |   |     |   |    |    |    |
| 00  | NA                         |                                                                                                                                                             |                                                                                                                                        |   |     |   |    |    |    |
| 795 | cardiovasc_day12_e71       | Section Header: DAY 4<br>Cardiovascular Failure?<br><i>Organ failure defined as systolic blood pressure equal or less than 90mmhg not fluid responsive.</i> | dropdown<br><table border="1"> <tr><td>1</td><td>Yes</td></tr> <tr><td>0</td><td>No</td></tr> <tr><td>00</td><td>NA</td></tr> </table> | 1 | Yes | 0 | No | 00 | NA |
| 1   | Yes                        |                                                                                                                                                             |                                                                                                                                        |   |     |   |    |    |    |
| 0   | No                         |                                                                                                                                                             |                                                                                                                                        |   |     |   |    |    |    |
| 00  | NA                         |                                                                                                                                                             |                                                                                                                                        |   |     |   |    |    |    |
| 796 | pulmonary_failure_day2_d06 | Pulmonary Failure?<br><i>Organ failure defined as PaO2/FiO2 equal or less than 300</i>                                                                      | dropdown<br><table border="1"> <tr><td>1</td><td>Yes</td></tr> <tr><td>0</td><td>No</td></tr> <tr><td>00</td><td>NA</td></tr> </table> | 1 | Yes | 0 | No | 00 | NA |
| 1   | Yes                        |                                                                                                                                                             |                                                                                                                                        |   |     |   |    |    |    |
| 0   | No                         |                                                                                                                                                             |                                                                                                                                        |   |     |   |    |    |    |
| 00  | NA                         |                                                                                                                                                             |                                                                                                                                        |   |     |   |    |    |    |
| 797 | cns_failure_day_12_3ff     | Central Nervous System Failure?<br><i>Organ failure defined as Glasgow coma score equal or less than 12</i>                                                 | dropdown<br><table border="1"> <tr><td>1</td><td>Yes</td></tr> <tr><td>0</td><td>No</td></tr> <tr><td>00</td><td>NA</td></tr> </table> | 1 | Yes | 0 | No | 00 | NA |
| 1   | Yes                        |                                                                                                                                                             |                                                                                                                                        |   |     |   |    |    |    |
| 0   | No                         |                                                                                                                                                             |                                                                                                                                        |   |     |   |    |    |    |
| 00  | NA                         |                                                                                                                                                             |                                                                                                                                        |   |     |   |    |    |    |
| 798 | caogulation_failure_d2_849 | Coagulation Failure?<br><i>Organ failure defined as platelets equal or less than 80.000</i>                                                                 | dropdown<br><table border="1"> <tr><td>1</td><td>Yes</td></tr> <tr><td>0</td><td>No</td></tr> <tr><td>00</td><td>NA</td></tr> </table> | 1 | Yes | 0 | No | 00 | NA |
| 1   | Yes                        |                                                                                                                                                             |                                                                                                                                        |   |     |   |    |    |    |
| 0   | No                         |                                                                                                                                                             |                                                                                                                                        |   |     |   |    |    |    |
| 00  | NA                         |                                                                                                                                                             |                                                                                                                                        |   |     |   |    |    |    |
| 799 | renal_failure2_3a22_9d5    | Renal Failure?<br><i>Organ failure defined as creatinine equal or greater than 2.0</i>                                                                      | dropdown<br><table border="1"> <tr><td>1</td><td>Yes</td></tr> <tr><td>0</td><td>No</td></tr> <tr><td>00</td><td>NA</td></tr> </table> | 1 | Yes | 0 | No | 00 | NA |
| 1   | Yes                        |                                                                                                                                                             |                                                                                                                                        |   |     |   |    |    |    |
| 0   | No                         |                                                                                                                                                             |                                                                                                                                        |   |     |   |    |    |    |
| 00  | NA                         |                                                                                                                                                             |                                                                                                                                        |   |     |   |    |    |    |
| 800 | hepatic_failure_day_12_44b | Hepatic Failure?<br><i>Organ failure defined as bilirubin equal or greater than 2.0</i>                                                                     | dropdown<br><table border="1"> <tr><td>1</td><td>Yes</td></tr> <tr><td>0</td><td>No</td></tr> <tr><td>00</td><td>NA</td></tr> </table> | 1 | Yes | 0 | No | 00 | NA |
| 1   | Yes                        |                                                                                                                                                             |                                                                                                                                        |   |     |   |    |    |    |
| 0   | No                         |                                                                                                                                                             |                                                                                                                                        |   |     |   |    |    |    |
| 00  | NA                         |                                                                                                                                                             |                                                                                                                                        |   |     |   |    |    |    |
| 801 | free_of_all_day_12_c62_8bb | Free of all organ failure?                                                                                                                                  | dropdown<br><table border="1"> <tr><td>1</td><td>Yes</td></tr> <tr><td>0</td><td>No</td></tr> <tr><td>00</td><td>NA</td></tr> </table> | 1 | Yes | 0 | No | 00 | NA |
| 1   | Yes                        |                                                                                                                                                             |                                                                                                                                        |   |     |   |    |    |    |
| 0   | No                         |                                                                                                                                                             |                                                                                                                                        |   |     |   |    |    |    |
| 00  | NA                         |                                                                                                                                                             |                                                                                                                                        |   |     |   |    |    |    |
| 802 | cardiovasc_day12_8b2       | Section Header: DAY 5<br>Cardiovascular Failure?<br><i>Organ failure defined as systolic blood pressure equal or less than 90mmhg not fluid responsive.</i> | dropdown<br><table border="1"> <tr><td>1</td><td>Yes</td></tr> <tr><td>0</td><td>No</td></tr> <tr><td>00</td><td>NA</td></tr> </table> | 1 | Yes | 0 | No | 00 | NA |
| 1   | Yes                        |                                                                                                                                                             |                                                                                                                                        |   |     |   |    |    |    |
| 0   | No                         |                                                                                                                                                             |                                                                                                                                        |   |     |   |    |    |    |
| 00  | NA                         |                                                                                                                                                             |                                                                                                                                        |   |     |   |    |    |    |
| 803 | pulmonary_failure_day2_7bf | Pulmonary Failure?<br><i>Organ failure defined as PaO2/FiO2 equal or less than 300</i>                                                                      | dropdown<br><table border="1"> <tr><td>1</td><td>Yes</td></tr> <tr><td>0</td><td>No</td></tr> <tr><td>00</td><td>NA</td></tr> </table> | 1 | Yes | 0 | No | 00 | NA |
| 1   | Yes                        |                                                                                                                                                             |                                                                                                                                        |   |     |   |    |    |    |
| 0   | No                         |                                                                                                                                                             |                                                                                                                                        |   |     |   |    |    |    |
| 00  | NA                         |                                                                                                                                                             |                                                                                                                                        |   |     |   |    |    |    |
| 804 | cns_failure_day_12_698     | Central Nervous System Failure?<br><i>Organ failure defined as Glasgow coma score equal or less than 12</i>                                                 | dropdown<br><table border="1"> <tr><td>1</td><td>Yes</td></tr> <tr><td>0</td><td>No</td></tr> <tr><td>00</td><td>NA</td></tr> </table> | 1 | Yes | 0 | No | 00 | NA |
| 1   | Yes                        |                                                                                                                                                             |                                                                                                                                        |   |     |   |    |    |    |
| 0   | No                         |                                                                                                                                                             |                                                                                                                                        |   |     |   |    |    |    |
| 00  | NA                         |                                                                                                                                                             |                                                                                                                                        |   |     |   |    |    |    |
| 805 | caogulation_failure_d2_112 | Coagulation Failure?<br><i>Organ failure defined as platelets equal or less than 80.000</i>                                                                 | dropdown<br><table border="1"> <tr><td>1</td><td>Yes</td></tr> <tr><td>0</td><td>No</td></tr> <tr><td>00</td><td>NA</td></tr> </table> | 1 | Yes | 0 | No | 00 | NA |
| 1   | Yes                        |                                                                                                                                                             |                                                                                                                                        |   |     |   |    |    |    |
| 0   | No                         |                                                                                                                                                             |                                                                                                                                        |   |     |   |    |    |    |
| 00  | NA                         |                                                                                                                                                             |                                                                                                                                        |   |     |   |    |    |    |

|     |                            |                                                                                                                                                             |                                                                                                                                        |   |     |   |    |    |    |
|-----|----------------------------|-------------------------------------------------------------------------------------------------------------------------------------------------------------|----------------------------------------------------------------------------------------------------------------------------------------|---|-----|---|----|----|----|
| 806 | renal_failure2_3a22_92_647 | Renal Failure?<br><i>Organ failure defined as creatinine equal or greater than 2.0</i>                                                                      | dropdown<br><table border="1"> <tr><td>1</td><td>Yes</td></tr> <tr><td>0</td><td>No</td></tr> <tr><td>00</td><td>NA</td></tr> </table> | 1 | Yes | 0 | No | 00 | NA |
| 1   | Yes                        |                                                                                                                                                             |                                                                                                                                        |   |     |   |    |    |    |
| 0   | No                         |                                                                                                                                                             |                                                                                                                                        |   |     |   |    |    |    |
| 00  | NA                         |                                                                                                                                                             |                                                                                                                                        |   |     |   |    |    |    |
| 807 | hepatic_failure_day_12_a97 | Hepatic Failure?<br><i>Organ failure defined as bilirubin equal or greater than 2.0</i>                                                                     | dropdown<br><table border="1"> <tr><td>1</td><td>Yes</td></tr> <tr><td>0</td><td>No</td></tr> <tr><td>00</td><td>NA</td></tr> </table> | 1 | Yes | 0 | No | 00 | NA |
| 1   | Yes                        |                                                                                                                                                             |                                                                                                                                        |   |     |   |    |    |    |
| 0   | No                         |                                                                                                                                                             |                                                                                                                                        |   |     |   |    |    |    |
| 00  | NA                         |                                                                                                                                                             |                                                                                                                                        |   |     |   |    |    |    |
| 808 | free_of_all_day_12_c62_366 | Free of all organ failure?                                                                                                                                  | dropdown<br><table border="1"> <tr><td>1</td><td>Yes</td></tr> <tr><td>0</td><td>No</td></tr> <tr><td>00</td><td>NA</td></tr> </table> | 1 | Yes | 0 | No | 00 | NA |
| 1   | Yes                        |                                                                                                                                                             |                                                                                                                                        |   |     |   |    |    |    |
| 0   | No                         |                                                                                                                                                             |                                                                                                                                        |   |     |   |    |    |    |
| 00  | NA                         |                                                                                                                                                             |                                                                                                                                        |   |     |   |    |    |    |
| 809 | cardiovasc_day12_8f8       | Section Header: DAY 6<br>Cardiovascular Failure?<br><i>Organ failure defined as systolic blood pressure equal or less than 90mmhg not fluid responsive.</i> | dropdown<br><table border="1"> <tr><td>1</td><td>Yes</td></tr> <tr><td>0</td><td>No</td></tr> <tr><td>00</td><td>NA</td></tr> </table> | 1 | Yes | 0 | No | 00 | NA |
| 1   | Yes                        |                                                                                                                                                             |                                                                                                                                        |   |     |   |    |    |    |
| 0   | No                         |                                                                                                                                                             |                                                                                                                                        |   |     |   |    |    |    |
| 00  | NA                         |                                                                                                                                                             |                                                                                                                                        |   |     |   |    |    |    |
| 810 | pulmonary_failure_day2_170 | Pulmonary Failure?<br><i>Organ failure defined as PaO2/FiO2 equal or less than 300</i>                                                                      | dropdown<br><table border="1"> <tr><td>1</td><td>Yes</td></tr> <tr><td>0</td><td>No</td></tr> <tr><td>00</td><td>NA</td></tr> </table> | 1 | Yes | 0 | No | 00 | NA |
| 1   | Yes                        |                                                                                                                                                             |                                                                                                                                        |   |     |   |    |    |    |
| 0   | No                         |                                                                                                                                                             |                                                                                                                                        |   |     |   |    |    |    |
| 00  | NA                         |                                                                                                                                                             |                                                                                                                                        |   |     |   |    |    |    |
| 811 | cns_failure_day_12_64a     | Central Nervous System Failure?<br><i>Organ failure defined as Glasgow coma score equal or less than 12</i>                                                 | dropdown<br><table border="1"> <tr><td>1</td><td>Yes</td></tr> <tr><td>0</td><td>No</td></tr> <tr><td>00</td><td>NA</td></tr> </table> | 1 | Yes | 0 | No | 00 | NA |
| 1   | Yes                        |                                                                                                                                                             |                                                                                                                                        |   |     |   |    |    |    |
| 0   | No                         |                                                                                                                                                             |                                                                                                                                        |   |     |   |    |    |    |
| 00  | NA                         |                                                                                                                                                             |                                                                                                                                        |   |     |   |    |    |    |
| 812 | caogulation_failure_d2_4d8 | Coagulation Failure?<br><i>Organ failure defined as platelets equal or less than 80,000</i>                                                                 | dropdown<br><table border="1"> <tr><td>1</td><td>Yes</td></tr> <tr><td>0</td><td>No</td></tr> <tr><td>00</td><td>NA</td></tr> </table> | 1 | Yes | 0 | No | 00 | NA |
| 1   | Yes                        |                                                                                                                                                             |                                                                                                                                        |   |     |   |    |    |    |
| 0   | No                         |                                                                                                                                                             |                                                                                                                                        |   |     |   |    |    |    |
| 00  | NA                         |                                                                                                                                                             |                                                                                                                                        |   |     |   |    |    |    |
| 813 | renal_failure2_3a22_92_727 | Renal Failure?<br><i>Organ failure defined as creatinine equal or greater than 2.0</i>                                                                      | dropdown<br><table border="1"> <tr><td>1</td><td>Yes</td></tr> <tr><td>0</td><td>No</td></tr> <tr><td>00</td><td>NA</td></tr> </table> | 1 | Yes | 0 | No | 00 | NA |
| 1   | Yes                        |                                                                                                                                                             |                                                                                                                                        |   |     |   |    |    |    |
| 0   | No                         |                                                                                                                                                             |                                                                                                                                        |   |     |   |    |    |    |
| 00  | NA                         |                                                                                                                                                             |                                                                                                                                        |   |     |   |    |    |    |
| 814 | hepatic_failure_day_12_3fc | Hepatic Failure?<br><i>Organ failure defined as bilirubin equal or greater than 2.0</i>                                                                     | dropdown<br><table border="1"> <tr><td>1</td><td>Yes</td></tr> <tr><td>0</td><td>No</td></tr> <tr><td>00</td><td>NA</td></tr> </table> | 1 | Yes | 0 | No | 00 | NA |
| 1   | Yes                        |                                                                                                                                                             |                                                                                                                                        |   |     |   |    |    |    |
| 0   | No                         |                                                                                                                                                             |                                                                                                                                        |   |     |   |    |    |    |
| 00  | NA                         |                                                                                                                                                             |                                                                                                                                        |   |     |   |    |    |    |
| 815 | free_of_all_day_12_c62_0e2 | Free of all organ failure?                                                                                                                                  | dropdown<br><table border="1"> <tr><td>1</td><td>Yes</td></tr> <tr><td>0</td><td>No</td></tr> <tr><td>00</td><td>NA</td></tr> </table> | 1 | Yes | 0 | No | 00 | NA |
| 1   | Yes                        |                                                                                                                                                             |                                                                                                                                        |   |     |   |    |    |    |
| 0   | No                         |                                                                                                                                                             |                                                                                                                                        |   |     |   |    |    |    |
| 00  | NA                         |                                                                                                                                                             |                                                                                                                                        |   |     |   |    |    |    |
| 816 | cardiovasc_day12_d49       | Section Header: DAY 7<br>Cardiovascular Failure?<br><i>Organ failure defined as systolic blood pressure equal or less than 90mmhg not fluid responsive.</i> | dropdown<br><table border="1"> <tr><td>1</td><td>Yes</td></tr> <tr><td>0</td><td>No</td></tr> <tr><td>00</td><td>NA</td></tr> </table> | 1 | Yes | 0 | No | 00 | NA |
| 1   | Yes                        |                                                                                                                                                             |                                                                                                                                        |   |     |   |    |    |    |
| 0   | No                         |                                                                                                                                                             |                                                                                                                                        |   |     |   |    |    |    |
| 00  | NA                         |                                                                                                                                                             |                                                                                                                                        |   |     |   |    |    |    |
| 817 | pulmonary_failure_day2_155 | Pulmonary Failure?<br><i>Organ failure defined as PaO2/FiO2 equal or less than 300</i>                                                                      | dropdown<br><table border="1"> <tr><td>1</td><td>Yes</td></tr> <tr><td>0</td><td>No</td></tr> <tr><td>00</td><td>NA</td></tr> </table> | 1 | Yes | 0 | No | 00 | NA |
| 1   | Yes                        |                                                                                                                                                             |                                                                                                                                        |   |     |   |    |    |    |
| 0   | No                         |                                                                                                                                                             |                                                                                                                                        |   |     |   |    |    |    |
| 00  | NA                         |                                                                                                                                                             |                                                                                                                                        |   |     |   |    |    |    |
| 818 | cns_failure_day_12_69e     | Central Nervous System Failure?<br><i>Organ failure defined as Glasgow coma score equal or less than 12</i>                                                 | dropdown<br><table border="1"> <tr><td>1</td><td>Yes</td></tr> <tr><td>0</td><td>No</td></tr> <tr><td>00</td><td>NA</td></tr> </table> | 1 | Yes | 0 | No | 00 | NA |
| 1   | Yes                        |                                                                                                                                                             |                                                                                                                                        |   |     |   |    |    |    |
| 0   | No                         |                                                                                                                                                             |                                                                                                                                        |   |     |   |    |    |    |
| 00  | NA                         |                                                                                                                                                             |                                                                                                                                        |   |     |   |    |    |    |

|     |                            |                                                                                                                                                             |                                                                                                                                        |   |     |   |    |    |    |
|-----|----------------------------|-------------------------------------------------------------------------------------------------------------------------------------------------------------|----------------------------------------------------------------------------------------------------------------------------------------|---|-----|---|----|----|----|
| 819 | caogulation_failure_d2_0c2 | Coagulation Failure?<br><i>Organ failure defined as platelets equal or less than 80,000</i>                                                                 | dropdown<br><table border="1"> <tr><td>1</td><td>Yes</td></tr> <tr><td>0</td><td>No</td></tr> <tr><td>00</td><td>NA</td></tr> </table> | 1 | Yes | 0 | No | 00 | NA |
| 1   | Yes                        |                                                                                                                                                             |                                                                                                                                        |   |     |   |    |    |    |
| 0   | No                         |                                                                                                                                                             |                                                                                                                                        |   |     |   |    |    |    |
| 00  | NA                         |                                                                                                                                                             |                                                                                                                                        |   |     |   |    |    |    |
| 820 | renal_failure2_3a22_92_cf4 | Renal Failure?<br><i>Organ failure defined as creatinine equal or greater than 2.0</i>                                                                      | dropdown<br><table border="1"> <tr><td>1</td><td>Yes</td></tr> <tr><td>0</td><td>No</td></tr> <tr><td>00</td><td>NA</td></tr> </table> | 1 | Yes | 0 | No | 00 | NA |
| 1   | Yes                        |                                                                                                                                                             |                                                                                                                                        |   |     |   |    |    |    |
| 0   | No                         |                                                                                                                                                             |                                                                                                                                        |   |     |   |    |    |    |
| 00  | NA                         |                                                                                                                                                             |                                                                                                                                        |   |     |   |    |    |    |
| 821 | hepatic_failure_day_12_fa7 | Hepatic Failure?<br><i>Organ failure defined as bilirubin equal or greater than 2.0</i>                                                                     | dropdown<br><table border="1"> <tr><td>1</td><td>Yes</td></tr> <tr><td>0</td><td>No</td></tr> <tr><td>00</td><td>NA</td></tr> </table> | 1 | Yes | 0 | No | 00 | NA |
| 1   | Yes                        |                                                                                                                                                             |                                                                                                                                        |   |     |   |    |    |    |
| 0   | No                         |                                                                                                                                                             |                                                                                                                                        |   |     |   |    |    |    |
| 00  | NA                         |                                                                                                                                                             |                                                                                                                                        |   |     |   |    |    |    |
| 822 | free_of_all_day_12_c62_53a | Free of all organ failure?                                                                                                                                  | dropdown<br><table border="1"> <tr><td>1</td><td>Yes</td></tr> <tr><td>0</td><td>No</td></tr> <tr><td>00</td><td>NA</td></tr> </table> | 1 | Yes | 0 | No | 00 | NA |
| 1   | Yes                        |                                                                                                                                                             |                                                                                                                                        |   |     |   |    |    |    |
| 0   | No                         |                                                                                                                                                             |                                                                                                                                        |   |     |   |    |    |    |
| 00  | NA                         |                                                                                                                                                             |                                                                                                                                        |   |     |   |    |    |    |
| 823 | cardiovasc_day12_a68       | Section Header: DAY 8<br>Cardiovascular Failure?<br><i>Organ failure defined as systolic blood pressure equal or less than 90mmhg not fluid responsive.</i> | dropdown<br><table border="1"> <tr><td>1</td><td>Yes</td></tr> <tr><td>0</td><td>No</td></tr> <tr><td>00</td><td>NA</td></tr> </table> | 1 | Yes | 0 | No | 00 | NA |
| 1   | Yes                        |                                                                                                                                                             |                                                                                                                                        |   |     |   |    |    |    |
| 0   | No                         |                                                                                                                                                             |                                                                                                                                        |   |     |   |    |    |    |
| 00  | NA                         |                                                                                                                                                             |                                                                                                                                        |   |     |   |    |    |    |
| 824 | pulmonary_failure_day2_09c | Pulmonary Failure?<br><i>Organ failure defined as PaO2/FiO2 equal or less than 300</i>                                                                      | dropdown<br><table border="1"> <tr><td>1</td><td>Yes</td></tr> <tr><td>0</td><td>No</td></tr> <tr><td>00</td><td>NA</td></tr> </table> | 1 | Yes | 0 | No | 00 | NA |
| 1   | Yes                        |                                                                                                                                                             |                                                                                                                                        |   |     |   |    |    |    |
| 0   | No                         |                                                                                                                                                             |                                                                                                                                        |   |     |   |    |    |    |
| 00  | NA                         |                                                                                                                                                             |                                                                                                                                        |   |     |   |    |    |    |
| 825 | cns_failure_day_12_083     | Central Nervous System Failure?<br><i>Organ failure defined as Glasgow coma score equal or less than 12</i>                                                 | dropdown<br><table border="1"> <tr><td>1</td><td>Yes</td></tr> <tr><td>0</td><td>No</td></tr> <tr><td>00</td><td>NA</td></tr> </table> | 1 | Yes | 0 | No | 00 | NA |
| 1   | Yes                        |                                                                                                                                                             |                                                                                                                                        |   |     |   |    |    |    |
| 0   | No                         |                                                                                                                                                             |                                                                                                                                        |   |     |   |    |    |    |
| 00  | NA                         |                                                                                                                                                             |                                                                                                                                        |   |     |   |    |    |    |
| 826 | caogulation_failure_d2_915 | Coagulation Failure?<br><i>Organ failure defined as platelets equal or less than 80,000</i>                                                                 | dropdown<br><table border="1"> <tr><td>1</td><td>Yes</td></tr> <tr><td>0</td><td>No</td></tr> <tr><td>00</td><td>NA</td></tr> </table> | 1 | Yes | 0 | No | 00 | NA |
| 1   | Yes                        |                                                                                                                                                             |                                                                                                                                        |   |     |   |    |    |    |
| 0   | No                         |                                                                                                                                                             |                                                                                                                                        |   |     |   |    |    |    |
| 00  | NA                         |                                                                                                                                                             |                                                                                                                                        |   |     |   |    |    |    |
| 827 | renal_failure2_3a22_92_1fc | Renal Failure?<br><i>Organ failure defined as creatinine equal or greater than 2.0</i>                                                                      | dropdown<br><table border="1"> <tr><td>1</td><td>Yes</td></tr> <tr><td>0</td><td>No</td></tr> <tr><td>00</td><td>NA</td></tr> </table> | 1 | Yes | 0 | No | 00 | NA |
| 1   | Yes                        |                                                                                                                                                             |                                                                                                                                        |   |     |   |    |    |    |
| 0   | No                         |                                                                                                                                                             |                                                                                                                                        |   |     |   |    |    |    |
| 00  | NA                         |                                                                                                                                                             |                                                                                                                                        |   |     |   |    |    |    |
| 828 | hepatic_failure_day_12_765 | Hepatic Failure?<br><i>Organ failure defined as bilirubin equal or greater than 2.0</i>                                                                     | dropdown<br><table border="1"> <tr><td>1</td><td>Yes</td></tr> <tr><td>0</td><td>No</td></tr> <tr><td>00</td><td>NA</td></tr> </table> | 1 | Yes | 0 | No | 00 | NA |
| 1   | Yes                        |                                                                                                                                                             |                                                                                                                                        |   |     |   |    |    |    |
| 0   | No                         |                                                                                                                                                             |                                                                                                                                        |   |     |   |    |    |    |
| 00  | NA                         |                                                                                                                                                             |                                                                                                                                        |   |     |   |    |    |    |
| 829 | free_of_all_day_12_c62_cc0 | Free of all organ failure?                                                                                                                                  | dropdown<br><table border="1"> <tr><td>1</td><td>Yes</td></tr> <tr><td>0</td><td>No</td></tr> <tr><td>00</td><td>NA</td></tr> </table> | 1 | Yes | 0 | No | 00 | NA |
| 1   | Yes                        |                                                                                                                                                             |                                                                                                                                        |   |     |   |    |    |    |
| 0   | No                         |                                                                                                                                                             |                                                                                                                                        |   |     |   |    |    |    |
| 00  | NA                         |                                                                                                                                                             |                                                                                                                                        |   |     |   |    |    |    |
| 830 | cardiovasc_day12_7c5       | Section Header: DAY 9<br>Cardiovascular Failure?<br><i>Organ failure defined as systolic blood pressure equal or less than 90mmhg not fluid responsive.</i> | dropdown<br><table border="1"> <tr><td>1</td><td>Yes</td></tr> <tr><td>0</td><td>No</td></tr> <tr><td>00</td><td>NA</td></tr> </table> | 1 | Yes | 0 | No | 00 | NA |
| 1   | Yes                        |                                                                                                                                                             |                                                                                                                                        |   |     |   |    |    |    |
| 0   | No                         |                                                                                                                                                             |                                                                                                                                        |   |     |   |    |    |    |
| 00  | NA                         |                                                                                                                                                             |                                                                                                                                        |   |     |   |    |    |    |
| 831 | pulmonary_failure_day2_383 | Pulmonary Failure?<br><i>Organ failure defined as PaO2/FiO2 equal or less than 300</i>                                                                      | dropdown<br><table border="1"> <tr><td>1</td><td>Yes</td></tr> <tr><td>0</td><td>No</td></tr> <tr><td>00</td><td>NA</td></tr> </table> | 1 | Yes | 0 | No | 00 | NA |
| 1   | Yes                        |                                                                                                                                                             |                                                                                                                                        |   |     |   |    |    |    |
| 0   | No                         |                                                                                                                                                             |                                                                                                                                        |   |     |   |    |    |    |
| 00  | NA                         |                                                                                                                                                             |                                                                                                                                        |   |     |   |    |    |    |

|     |                            |                                                                                                                                                                             |                                                                                                                                            |   |     |   |    |    |    |
|-----|----------------------------|-----------------------------------------------------------------------------------------------------------------------------------------------------------------------------|--------------------------------------------------------------------------------------------------------------------------------------------|---|-----|---|----|----|----|
| 832 | cns_failure_day_12_255     | <p>Central Nervous System Failure?</p> <p><i>Organ failure defined as Glasgow coma score equal or less than 12</i></p>                                                      | <p>dropdown</p> <table border="1"> <tr><td>1</td><td>Yes</td></tr> <tr><td>0</td><td>No</td></tr> <tr><td>00</td><td>NA</td></tr> </table> | 1 | Yes | 0 | No | 00 | NA |
| 1   | Yes                        |                                                                                                                                                                             |                                                                                                                                            |   |     |   |    |    |    |
| 0   | No                         |                                                                                                                                                                             |                                                                                                                                            |   |     |   |    |    |    |
| 00  | NA                         |                                                                                                                                                                             |                                                                                                                                            |   |     |   |    |    |    |
| 833 | caogulation_failure_d2_b2c | <p>Coagulation Failure?</p> <p><i>Organ failure defined as platelets equal or less than 80.000</i></p>                                                                      | <p>dropdown</p> <table border="1"> <tr><td>1</td><td>Yes</td></tr> <tr><td>0</td><td>No</td></tr> <tr><td>00</td><td>NA</td></tr> </table> | 1 | Yes | 0 | No | 00 | NA |
| 1   | Yes                        |                                                                                                                                                                             |                                                                                                                                            |   |     |   |    |    |    |
| 0   | No                         |                                                                                                                                                                             |                                                                                                                                            |   |     |   |    |    |    |
| 00  | NA                         |                                                                                                                                                                             |                                                                                                                                            |   |     |   |    |    |    |
| 834 | renal_failure2_3a22_92_023 | <p>Renal Failure?</p> <p><i>Organ failure defined as creatinine equal or greater than 2.0</i></p>                                                                           | <p>dropdown</p> <table border="1"> <tr><td>1</td><td>Yes</td></tr> <tr><td>0</td><td>No</td></tr> <tr><td>00</td><td>NA</td></tr> </table> | 1 | Yes | 0 | No | 00 | NA |
| 1   | Yes                        |                                                                                                                                                                             |                                                                                                                                            |   |     |   |    |    |    |
| 0   | No                         |                                                                                                                                                                             |                                                                                                                                            |   |     |   |    |    |    |
| 00  | NA                         |                                                                                                                                                                             |                                                                                                                                            |   |     |   |    |    |    |
| 835 | hepatic_failure_day_12_b51 | <p>Hepatic Failure?</p> <p><i>Organ failure defined as bilirubin equal or greater than 2.0</i></p>                                                                          | <p>dropdown</p> <table border="1"> <tr><td>1</td><td>Yes</td></tr> <tr><td>0</td><td>No</td></tr> <tr><td>00</td><td>NA</td></tr> </table> | 1 | Yes | 0 | No | 00 | NA |
| 1   | Yes                        |                                                                                                                                                                             |                                                                                                                                            |   |     |   |    |    |    |
| 0   | No                         |                                                                                                                                                                             |                                                                                                                                            |   |     |   |    |    |    |
| 00  | NA                         |                                                                                                                                                                             |                                                                                                                                            |   |     |   |    |    |    |
| 836 | free_of_all_day_12_c62_d88 | <p>Free of all organ failure?</p>                                                                                                                                           | <p>dropdown</p> <table border="1"> <tr><td>1</td><td>Yes</td></tr> <tr><td>0</td><td>No</td></tr> <tr><td>00</td><td>NA</td></tr> </table> | 1 | Yes | 0 | No | 00 | NA |
| 1   | Yes                        |                                                                                                                                                                             |                                                                                                                                            |   |     |   |    |    |    |
| 0   | No                         |                                                                                                                                                                             |                                                                                                                                            |   |     |   |    |    |    |
| 00  | NA                         |                                                                                                                                                                             |                                                                                                                                            |   |     |   |    |    |    |
| 837 | cardiovasc_day12_88b       | <p>Section Header: DAY 10</p> <p>Cardiovascular Failure?</p> <p><i>Organ failure defined as systolic blood pressure equal or less than 90mmhg not fluid responsive.</i></p> | <p>dropdown</p> <table border="1"> <tr><td>1</td><td>Yes</td></tr> <tr><td>0</td><td>No</td></tr> <tr><td>00</td><td>NA</td></tr> </table> | 1 | Yes | 0 | No | 00 | NA |
| 1   | Yes                        |                                                                                                                                                                             |                                                                                                                                            |   |     |   |    |    |    |
| 0   | No                         |                                                                                                                                                                             |                                                                                                                                            |   |     |   |    |    |    |
| 00  | NA                         |                                                                                                                                                                             |                                                                                                                                            |   |     |   |    |    |    |
| 838 | pulmonary_failure_day2_11d | <p>Pulmonary Failure?</p> <p><i>Organ failure defined as PaO2/FiO2 equal or less than 300</i></p>                                                                           | <p>dropdown</p> <table border="1"> <tr><td>1</td><td>Yes</td></tr> <tr><td>0</td><td>No</td></tr> <tr><td>00</td><td>NA</td></tr> </table> | 1 | Yes | 0 | No | 00 | NA |
| 1   | Yes                        |                                                                                                                                                                             |                                                                                                                                            |   |     |   |    |    |    |
| 0   | No                         |                                                                                                                                                                             |                                                                                                                                            |   |     |   |    |    |    |
| 00  | NA                         |                                                                                                                                                                             |                                                                                                                                            |   |     |   |    |    |    |
| 839 | caogulation_failure_d2_960 | <p>Coagulation Failure?</p> <p><i>Organ failure defined as platelets equal or less than 80.000</i></p>                                                                      | <p>dropdown</p> <table border="1"> <tr><td>1</td><td>Yes</td></tr> <tr><td>0</td><td>No</td></tr> <tr><td>00</td><td>NA</td></tr> </table> | 1 | Yes | 0 | No | 00 | NA |
| 1   | Yes                        |                                                                                                                                                                             |                                                                                                                                            |   |     |   |    |    |    |
| 0   | No                         |                                                                                                                                                                             |                                                                                                                                            |   |     |   |    |    |    |
| 00  | NA                         |                                                                                                                                                                             |                                                                                                                                            |   |     |   |    |    |    |
| 840 | cns_failure_day_12_6a2_b9d | <p>Central Nervous System Failure?</p> <p><i>Organ failure defined as Glasgow coma score equal or less than 12</i></p>                                                      | <p>dropdown</p> <table border="1"> <tr><td>1</td><td>Yes</td></tr> <tr><td>0</td><td>No</td></tr> <tr><td>00</td><td>NA</td></tr> </table> | 1 | Yes | 0 | No | 00 | NA |
| 1   | Yes                        |                                                                                                                                                                             |                                                                                                                                            |   |     |   |    |    |    |
| 0   | No                         |                                                                                                                                                                             |                                                                                                                                            |   |     |   |    |    |    |
| 00  | NA                         |                                                                                                                                                                             |                                                                                                                                            |   |     |   |    |    |    |
| 841 | renal_failure2_3a22_92_71f | <p>Renal Failure?</p> <p><i>Organ failure defined as creatinine equal or greater than 2.0</i></p>                                                                           | <p>dropdown</p> <table border="1"> <tr><td>1</td><td>Yes</td></tr> <tr><td>0</td><td>No</td></tr> <tr><td>00</td><td>NA</td></tr> </table> | 1 | Yes | 0 | No | 00 | NA |
| 1   | Yes                        |                                                                                                                                                                             |                                                                                                                                            |   |     |   |    |    |    |
| 0   | No                         |                                                                                                                                                                             |                                                                                                                                            |   |     |   |    |    |    |
| 00  | NA                         |                                                                                                                                                                             |                                                                                                                                            |   |     |   |    |    |    |
| 842 | hepatic_failure_day_12_961 | <p>Hepatic Failure?</p> <p><i>Organ failure defined as bilirubin equal or greater than 2.0</i></p>                                                                          | <p>dropdown</p> <table border="1"> <tr><td>1</td><td>Yes</td></tr> <tr><td>0</td><td>No</td></tr> <tr><td>00</td><td>NA</td></tr> </table> | 1 | Yes | 0 | No | 00 | NA |
| 1   | Yes                        |                                                                                                                                                                             |                                                                                                                                            |   |     |   |    |    |    |
| 0   | No                         |                                                                                                                                                                             |                                                                                                                                            |   |     |   |    |    |    |
| 00  | NA                         |                                                                                                                                                                             |                                                                                                                                            |   |     |   |    |    |    |
| 843 | free_of_all_day_12_c62_5ef | <p>Free of all organ failure?</p>                                                                                                                                           | <p>dropdown</p> <table border="1"> <tr><td>1</td><td>Yes</td></tr> <tr><td>0</td><td>No</td></tr> <tr><td>00</td><td>NA</td></tr> </table> | 1 | Yes | 0 | No | 00 | NA |
| 1   | Yes                        |                                                                                                                                                                             |                                                                                                                                            |   |     |   |    |    |    |
| 0   | No                         |                                                                                                                                                                             |                                                                                                                                            |   |     |   |    |    |    |
| 00  | NA                         |                                                                                                                                                                             |                                                                                                                                            |   |     |   |    |    |    |
| 844 | cardiovasc_day12_88b2_942  | <p>Section Header: DAY 11</p> <p>Cardiovascular Failure?</p> <p><i>Organ failure defined as systolic blood pressure equal or less than 90mmhg not fluid responsive.</i></p> | <p>dropdown</p> <table border="1"> <tr><td>1</td><td>Yes</td></tr> <tr><td>0</td><td>No</td></tr> <tr><td>00</td><td>NA</td></tr> </table> | 1 | Yes | 0 | No | 00 | NA |
| 1   | Yes                        |                                                                                                                                                                             |                                                                                                                                            |   |     |   |    |    |    |
| 0   | No                         |                                                                                                                                                                             |                                                                                                                                            |   |     |   |    |    |    |
| 00  | NA                         |                                                                                                                                                                             |                                                                                                                                            |   |     |   |    |    |    |



|     |                            |                                                                                                                                                                            |                                                                                                                                        |   |     |   |    |    |    |
|-----|----------------------------|----------------------------------------------------------------------------------------------------------------------------------------------------------------------------|----------------------------------------------------------------------------------------------------------------------------------------|---|-----|---|----|----|----|
| 845 | pulmonary_failure_day2_740 | <b>Pulmonary Failure?</b><br><i>Organ failure defined as PaO2/FiO2 equal or less than 300</i>                                                                              | dropdown<br><table border="1"> <tr><td>1</td><td>Yes</td></tr> <tr><td>0</td><td>No</td></tr> <tr><td>00</td><td>NA</td></tr> </table> | 1 | Yes | 0 | No | 00 | NA |
| 1   | Yes                        |                                                                                                                                                                            |                                                                                                                                        |   |     |   |    |    |    |
| 0   | No                         |                                                                                                                                                                            |                                                                                                                                        |   |     |   |    |    |    |
| 00  | NA                         |                                                                                                                                                                            |                                                                                                                                        |   |     |   |    |    |    |
| 846 | cns_failure_day_12_6a2_003 | <b>Central Nervous System Failure?</b><br><i>Organ failure defined as Glasgow coma score equal or less than 12</i>                                                         | dropdown<br><table border="1"> <tr><td>1</td><td>Yes</td></tr> <tr><td>0</td><td>No</td></tr> <tr><td>00</td><td>NA</td></tr> </table> | 1 | Yes | 0 | No | 00 | NA |
| 1   | Yes                        |                                                                                                                                                                            |                                                                                                                                        |   |     |   |    |    |    |
| 0   | No                         |                                                                                                                                                                            |                                                                                                                                        |   |     |   |    |    |    |
| 00  | NA                         |                                                                                                                                                                            |                                                                                                                                        |   |     |   |    |    |    |
| 847 | caogulation_failure_d2_d73 | <b>Coagulation Failure?</b><br><i>Organ failure defined as platelets equal or less than 80.000</i>                                                                         | dropdown<br><table border="1"> <tr><td>1</td><td>Yes</td></tr> <tr><td>0</td><td>No</td></tr> <tr><td>00</td><td>NA</td></tr> </table> | 1 | Yes | 0 | No | 00 | NA |
| 1   | Yes                        |                                                                                                                                                                            |                                                                                                                                        |   |     |   |    |    |    |
| 0   | No                         |                                                                                                                                                                            |                                                                                                                                        |   |     |   |    |    |    |
| 00  | NA                         |                                                                                                                                                                            |                                                                                                                                        |   |     |   |    |    |    |
| 848 | renal_failure2_3a22_92_4a3 | <b>Renal Failure?</b><br><i>Organ failure defined as creatinine equal or greater than 2.0</i>                                                                              | dropdown<br><table border="1"> <tr><td>1</td><td>Yes</td></tr> <tr><td>0</td><td>No</td></tr> <tr><td>00</td><td>NA</td></tr> </table> | 1 | Yes | 0 | No | 00 | NA |
| 1   | Yes                        |                                                                                                                                                                            |                                                                                                                                        |   |     |   |    |    |    |
| 0   | No                         |                                                                                                                                                                            |                                                                                                                                        |   |     |   |    |    |    |
| 00  | NA                         |                                                                                                                                                                            |                                                                                                                                        |   |     |   |    |    |    |
| 849 | hepatic_failure_day_12_4ed | <b>Hepatic Failure?</b><br><i>Organ failure defined as bilirubin equal or greater than 2.0</i>                                                                             | dropdown<br><table border="1"> <tr><td>1</td><td>Yes</td></tr> <tr><td>0</td><td>No</td></tr> <tr><td>00</td><td>NA</td></tr> </table> | 1 | Yes | 0 | No | 00 | NA |
| 1   | Yes                        |                                                                                                                                                                            |                                                                                                                                        |   |     |   |    |    |    |
| 0   | No                         |                                                                                                                                                                            |                                                                                                                                        |   |     |   |    |    |    |
| 00  | NA                         |                                                                                                                                                                            |                                                                                                                                        |   |     |   |    |    |    |
| 850 | free_of_all_day_12_c62_13a | <b>Free of all organ failure?</b>                                                                                                                                          | dropdown<br><table border="1"> <tr><td>1</td><td>Yes</td></tr> <tr><td>0</td><td>No</td></tr> <tr><td>00</td><td>NA</td></tr> </table> | 1 | Yes | 0 | No | 00 | NA |
| 1   | Yes                        |                                                                                                                                                                            |                                                                                                                                        |   |     |   |    |    |    |
| 0   | No                         |                                                                                                                                                                            |                                                                                                                                        |   |     |   |    |    |    |
| 00  | NA                         |                                                                                                                                                                            |                                                                                                                                        |   |     |   |    |    |    |
| 851 | cardiovasc_day12_88b22_370 | Section Header: <i>DAY 12</i><br><b>Cardiovascular Failure?</b><br><i>Organ failure defined as systolic blood pressure equal or less than 90mmhg not fluid responsive.</i> | dropdown<br><table border="1"> <tr><td>1</td><td>Yes</td></tr> <tr><td>0</td><td>No</td></tr> <tr><td>00</td><td>NA</td></tr> </table> | 1 | Yes | 0 | No | 00 | NA |
| 1   | Yes                        |                                                                                                                                                                            |                                                                                                                                        |   |     |   |    |    |    |
| 0   | No                         |                                                                                                                                                                            |                                                                                                                                        |   |     |   |    |    |    |
| 00  | NA                         |                                                                                                                                                                            |                                                                                                                                        |   |     |   |    |    |    |
| 852 | pulmonary_failure_day2_751 | <b>Pulmonary Failure?</b><br><i>Organ failure defined as PaO2/FiO2 equal or less than 300</i>                                                                              | dropdown<br><table border="1"> <tr><td>1</td><td>Yes</td></tr> <tr><td>0</td><td>No</td></tr> <tr><td>00</td><td>NA</td></tr> </table> | 1 | Yes | 0 | No | 00 | NA |
| 1   | Yes                        |                                                                                                                                                                            |                                                                                                                                        |   |     |   |    |    |    |
| 0   | No                         |                                                                                                                                                                            |                                                                                                                                        |   |     |   |    |    |    |
| 00  | NA                         |                                                                                                                                                                            |                                                                                                                                        |   |     |   |    |    |    |
| 853 | cns_failure_day_12_6a2_68c | <b>Central Nervous System Failure?</b><br><i>Organ failure defined as Glasgow coma score equal or less than 12</i>                                                         | dropdown<br><table border="1"> <tr><td>1</td><td>Yes</td></tr> <tr><td>0</td><td>No</td></tr> <tr><td>00</td><td>NA</td></tr> </table> | 1 | Yes | 0 | No | 00 | NA |
| 1   | Yes                        |                                                                                                                                                                            |                                                                                                                                        |   |     |   |    |    |    |
| 0   | No                         |                                                                                                                                                                            |                                                                                                                                        |   |     |   |    |    |    |
| 00  | NA                         |                                                                                                                                                                            |                                                                                                                                        |   |     |   |    |    |    |
| 854 | caogulation_failure_d2_0ca | <b>Coagulation Failure?</b><br><i>Organ failure defined as platelets equal or less than 80.000</i>                                                                         | dropdown<br><table border="1"> <tr><td>1</td><td>Yes</td></tr> <tr><td>0</td><td>No</td></tr> <tr><td>00</td><td>NA</td></tr> </table> | 1 | Yes | 0 | No | 00 | NA |
| 1   | Yes                        |                                                                                                                                                                            |                                                                                                                                        |   |     |   |    |    |    |
| 0   | No                         |                                                                                                                                                                            |                                                                                                                                        |   |     |   |    |    |    |
| 00  | NA                         |                                                                                                                                                                            |                                                                                                                                        |   |     |   |    |    |    |
| 855 | renal_failure2_3a22_92_9b4 | <b>Renal Failure?</b><br><i>Organ failure defined as creatinine equal or greater than 2.0</i>                                                                              | dropdown<br><table border="1"> <tr><td>1</td><td>Yes</td></tr> <tr><td>0</td><td>No</td></tr> <tr><td>00</td><td>NA</td></tr> </table> | 1 | Yes | 0 | No | 00 | NA |
| 1   | Yes                        |                                                                                                                                                                            |                                                                                                                                        |   |     |   |    |    |    |
| 0   | No                         |                                                                                                                                                                            |                                                                                                                                        |   |     |   |    |    |    |
| 00  | NA                         |                                                                                                                                                                            |                                                                                                                                        |   |     |   |    |    |    |
| 856 | hepatic_failure_day_12_2fd | <b>Hepatic Failure?</b><br><i>Organ failure defined as bilirubin equal or greater than 2.0</i>                                                                             | dropdown<br><table border="1"> <tr><td>1</td><td>Yes</td></tr> <tr><td>0</td><td>No</td></tr> <tr><td>00</td><td>NA</td></tr> </table> | 1 | Yes | 0 | No | 00 | NA |
| 1   | Yes                        |                                                                                                                                                                            |                                                                                                                                        |   |     |   |    |    |    |
| 0   | No                         |                                                                                                                                                                            |                                                                                                                                        |   |     |   |    |    |    |
| 00  | NA                         |                                                                                                                                                                            |                                                                                                                                        |   |     |   |    |    |    |
| 857 | free_of_all_day_12_c62_382 | <b>Free of all organ failure?</b>                                                                                                                                          | dropdown<br><table border="1"> <tr><td>1</td><td>Yes</td></tr> <tr><td>0</td><td>No</td></tr> <tr><td>00</td><td>NA</td></tr> </table> | 1 | Yes | 0 | No | 00 | NA |
| 1   | Yes                        |                                                                                                                                                                            |                                                                                                                                        |   |     |   |    |    |    |
| 0   | No                         |                                                                                                                                                                            |                                                                                                                                        |   |     |   |    |    |    |
| 00  | NA                         |                                                                                                                                                                            |                                                                                                                                        |   |     |   |    |    |    |

|     |                            |                                                                                                                                                                     |                                                                                                                                        |   |     |   |    |    |    |
|-----|----------------------------|---------------------------------------------------------------------------------------------------------------------------------------------------------------------|----------------------------------------------------------------------------------------------------------------------------------------|---|-----|---|----|----|----|
| 858 | cardiovasc_day12_88b22_92b | Section Header: DAY 13<br><b>Cardiovascular Failure?</b><br><i>Organ failure defined as systolic blood pressure equal or less than 90mmhg not fluid responsive.</i> | dropdown<br><table border="1"> <tr><td>1</td><td>Yes</td></tr> <tr><td>0</td><td>No</td></tr> <tr><td>00</td><td>NA</td></tr> </table> | 1 | Yes | 0 | No | 00 | NA |
| 1   | Yes                        |                                                                                                                                                                     |                                                                                                                                        |   |     |   |    |    |    |
| 0   | No                         |                                                                                                                                                                     |                                                                                                                                        |   |     |   |    |    |    |
| 00  | NA                         |                                                                                                                                                                     |                                                                                                                                        |   |     |   |    |    |    |
| 859 | pulmonary_failure_day2_cd9 | <b>Pulmonary Failure?</b><br><i>Organ failure defined as PaO2/FiO2 equal or less than 300</i>                                                                       | dropdown<br><table border="1"> <tr><td>1</td><td>Yes</td></tr> <tr><td>0</td><td>No</td></tr> <tr><td>00</td><td>NA</td></tr> </table> | 1 | Yes | 0 | No | 00 | NA |
| 1   | Yes                        |                                                                                                                                                                     |                                                                                                                                        |   |     |   |    |    |    |
| 0   | No                         |                                                                                                                                                                     |                                                                                                                                        |   |     |   |    |    |    |
| 00  | NA                         |                                                                                                                                                                     |                                                                                                                                        |   |     |   |    |    |    |
| 860 | cns_failure_day_12_6a2_e83 | <b>Central Nervous System Failure?</b><br><i>Organ failure defined as Glasgow coma score equal or less than 12</i>                                                  | dropdown<br><table border="1"> <tr><td>1</td><td>Yes</td></tr> <tr><td>0</td><td>No</td></tr> <tr><td>00</td><td>NA</td></tr> </table> | 1 | Yes | 0 | No | 00 | NA |
| 1   | Yes                        |                                                                                                                                                                     |                                                                                                                                        |   |     |   |    |    |    |
| 0   | No                         |                                                                                                                                                                     |                                                                                                                                        |   |     |   |    |    |    |
| 00  | NA                         |                                                                                                                                                                     |                                                                                                                                        |   |     |   |    |    |    |
| 861 | caogulation_failure_d2_d3b | <b>Coagulation Failure?</b><br><i>Organ failure defined as platelets equal or less than 80,000</i>                                                                  | dropdown<br><table border="1"> <tr><td>1</td><td>Yes</td></tr> <tr><td>0</td><td>No</td></tr> <tr><td>00</td><td>NA</td></tr> </table> | 1 | Yes | 0 | No | 00 | NA |
| 1   | Yes                        |                                                                                                                                                                     |                                                                                                                                        |   |     |   |    |    |    |
| 0   | No                         |                                                                                                                                                                     |                                                                                                                                        |   |     |   |    |    |    |
| 00  | NA                         |                                                                                                                                                                     |                                                                                                                                        |   |     |   |    |    |    |
| 862 | renal_failure2_3a22_92_5e6 | <b>Renal Failure?</b><br><i>Organ failure defined as creatinine equal or greater than 2.0</i>                                                                       | dropdown<br><table border="1"> <tr><td>1</td><td>Yes</td></tr> <tr><td>0</td><td>No</td></tr> <tr><td>00</td><td>NA</td></tr> </table> | 1 | Yes | 0 | No | 00 | NA |
| 1   | Yes                        |                                                                                                                                                                     |                                                                                                                                        |   |     |   |    |    |    |
| 0   | No                         |                                                                                                                                                                     |                                                                                                                                        |   |     |   |    |    |    |
| 00  | NA                         |                                                                                                                                                                     |                                                                                                                                        |   |     |   |    |    |    |
| 863 | hepatic_failure_day_12_5a1 | <b>Hepatic Failure?</b><br><i>Organ failure defined as bilirubin equal or greater than 2.0</i>                                                                      | dropdown<br><table border="1"> <tr><td>1</td><td>Yes</td></tr> <tr><td>0</td><td>No</td></tr> <tr><td>00</td><td>NA</td></tr> </table> | 1 | Yes | 0 | No | 00 | NA |
| 1   | Yes                        |                                                                                                                                                                     |                                                                                                                                        |   |     |   |    |    |    |
| 0   | No                         |                                                                                                                                                                     |                                                                                                                                        |   |     |   |    |    |    |
| 00  | NA                         |                                                                                                                                                                     |                                                                                                                                        |   |     |   |    |    |    |
| 864 | free_of_all_day_12_c62_2af | <b>Free of all organ failure?</b>                                                                                                                                   | dropdown<br><table border="1"> <tr><td>1</td><td>Yes</td></tr> <tr><td>0</td><td>No</td></tr> <tr><td>00</td><td>NA</td></tr> </table> | 1 | Yes | 0 | No | 00 | NA |
| 1   | Yes                        |                                                                                                                                                                     |                                                                                                                                        |   |     |   |    |    |    |
| 0   | No                         |                                                                                                                                                                     |                                                                                                                                        |   |     |   |    |    |    |
| 00  | NA                         |                                                                                                                                                                     |                                                                                                                                        |   |     |   |    |    |    |
| 865 | cardiovasc_day12_88b22_bb4 | Section Header: DAY 14<br><b>Cardiovascular Failure?</b><br><i>Organ failure defined as systolic blood pressure equal or less than 90mmhg not fluid responsive.</i> | dropdown<br><table border="1"> <tr><td>1</td><td>Yes</td></tr> <tr><td>0</td><td>No</td></tr> <tr><td>00</td><td>NA</td></tr> </table> | 1 | Yes | 0 | No | 00 | NA |
| 1   | Yes                        |                                                                                                                                                                     |                                                                                                                                        |   |     |   |    |    |    |
| 0   | No                         |                                                                                                                                                                     |                                                                                                                                        |   |     |   |    |    |    |
| 00  | NA                         |                                                                                                                                                                     |                                                                                                                                        |   |     |   |    |    |    |
| 866 | pulmonary_failure_day2_998 | <b>Pulmonary Failure?</b><br><i>Organ failure defined as PaO2/FiO2 equal or less than 300</i>                                                                       | dropdown<br><table border="1"> <tr><td>1</td><td>Yes</td></tr> <tr><td>0</td><td>No</td></tr> <tr><td>00</td><td>NA</td></tr> </table> | 1 | Yes | 0 | No | 00 | NA |
| 1   | Yes                        |                                                                                                                                                                     |                                                                                                                                        |   |     |   |    |    |    |
| 0   | No                         |                                                                                                                                                                     |                                                                                                                                        |   |     |   |    |    |    |
| 00  | NA                         |                                                                                                                                                                     |                                                                                                                                        |   |     |   |    |    |    |
| 867 | cns_failure_day_12_6a6     | <b>Central Nervous System Failure?</b><br><i>Organ failure defined as Glasgow coma score equal or less than 12</i>                                                  | dropdown<br><table border="1"> <tr><td>1</td><td>Yes</td></tr> <tr><td>0</td><td>No</td></tr> <tr><td>00</td><td>NA</td></tr> </table> | 1 | Yes | 0 | No | 00 | NA |
| 1   | Yes                        |                                                                                                                                                                     |                                                                                                                                        |   |     |   |    |    |    |
| 0   | No                         |                                                                                                                                                                     |                                                                                                                                        |   |     |   |    |    |    |
| 00  | NA                         |                                                                                                                                                                     |                                                                                                                                        |   |     |   |    |    |    |
| 868 | caogulation_failure_d2_e1d | <b>Coagulation Failure?</b><br><i>Organ failure defined as platelets equal or less than 80,000</i>                                                                  | dropdown<br><table border="1"> <tr><td>1</td><td>Yes</td></tr> <tr><td>0</td><td>No</td></tr> <tr><td>00</td><td>NA</td></tr> </table> | 1 | Yes | 0 | No | 00 | NA |
| 1   | Yes                        |                                                                                                                                                                     |                                                                                                                                        |   |     |   |    |    |    |
| 0   | No                         |                                                                                                                                                                     |                                                                                                                                        |   |     |   |    |    |    |
| 00  | NA                         |                                                                                                                                                                     |                                                                                                                                        |   |     |   |    |    |    |
| 869 | renal_failure2_3a22_92_542 | <b>Renal Failure?</b><br><i>Organ failure defined as creatinine equal or greater than 2.0</i>                                                                       | dropdown<br><table border="1"> <tr><td>1</td><td>Yes</td></tr> <tr><td>0</td><td>No</td></tr> <tr><td>00</td><td>NA</td></tr> </table> | 1 | Yes | 0 | No | 00 | NA |
| 1   | Yes                        |                                                                                                                                                                     |                                                                                                                                        |   |     |   |    |    |    |
| 0   | No                         |                                                                                                                                                                     |                                                                                                                                        |   |     |   |    |    |    |
| 00  | NA                         |                                                                                                                                                                     |                                                                                                                                        |   |     |   |    |    |    |
| 870 | hepatic_failure_day_12_aad | <b>Hepatic Failure?</b><br><i>Organ failure defined as bilirubin equal or greater than 2.0</i>                                                                      | dropdown<br><table border="1"> <tr><td>1</td><td>Yes</td></tr> <tr><td>0</td><td>No</td></tr> <tr><td>00</td><td>NA</td></tr> </table> | 1 | Yes | 0 | No | 00 | NA |
| 1   | Yes                        |                                                                                                                                                                     |                                                                                                                                        |   |     |   |    |    |    |
| 0   | No                         |                                                                                                                                                                     |                                                                                                                                        |   |     |   |    |    |    |
| 00  | NA                         |                                                                                                                                                                     |                                                                                                                                        |   |     |   |    |    |    |

|                                                                            |                                     |                                                           |                                                                                                                                                            |   |            |   |            |    |          |
|----------------------------------------------------------------------------|-------------------------------------|-----------------------------------------------------------|------------------------------------------------------------------------------------------------------------------------------------------------------------|---|------------|---|------------|----|----------|
| 871                                                                        | free_of_all_day_12_c62_d22          | Free of all organ failure?                                | dropdown<br><table border="1"> <tr><td>1</td><td>Yes</td></tr> <tr><td>0</td><td>No</td></tr> <tr><td>00</td><td>NA</td></tr> </table>                     | 1 | Yes        | 0 | No         | 00 | NA       |
| 1                                                                          | Yes                                 |                                                           |                                                                                                                                                            |   |            |   |            |    |          |
| 0                                                                          | No                                  |                                                           |                                                                                                                                                            |   |            |   |            |    |          |
| 00                                                                         | NA                                  |                                                           |                                                                                                                                                            |   |            |   |            |    |          |
| 872                                                                        | brussels_table_complete             | Section Header: <i>Form Status</i><br>Complete?           | dropdown<br><table border="1"> <tr><td>0</td><td>Incomplete</td></tr> <tr><td>1</td><td>Unverified</td></tr> <tr><td>2</td><td>Complete</td></tr> </table> | 0 | Incomplete | 1 | Unverified | 2  | Complete |
| 0                                                                          | Incomplete                          |                                                           |                                                                                                                                                            |   |            |   |            |    |          |
| 1                                                                          | Unverified                          |                                                           |                                                                                                                                                            |   |            |   |            |    |          |
| 2                                                                          | Complete                            |                                                           |                                                                                                                                                            |   |            |   |            |    |          |
| Instrument: <b>Case report form checklist</b> (case_report_form_checklist) |                                     |                                                           |                                                                                                                                                            |   |            |   |            |    |          |
| 873                                                                        | personal_form                       | Personal Information Screening And Demographics           | dropdown<br><table border="1"> <tr><td>1</td><td>Yes</td></tr> <tr><td>0</td><td>No</td></tr> </table>                                                     | 1 | Yes        | 0 | No         |    |          |
| 1                                                                          | Yes                                 |                                                           |                                                                                                                                                            |   |            |   |            |    |          |
| 0                                                                          | No                                  |                                                           |                                                                                                                                                            |   |            |   |            |    |          |
| 874                                                                        | admission_dx                        | Admission Diagnosis                                       | dropdown<br><table border="1"> <tr><td>1</td><td>Yes</td></tr> <tr><td>0</td><td>No</td></tr> </table>                                                     | 1 | Yes        | 0 | No         |    |          |
| 1                                                                          | Yes                                 |                                                           |                                                                                                                                                            |   |            |   |            |    |          |
| 0                                                                          | No                                  |                                                           |                                                                                                                                                            |   |            |   |            |    |          |
| 875                                                                        | medicalhist                         | Medical History                                           | dropdown<br><table border="1"> <tr><td>1</td><td>Yes</td></tr> <tr><td>0</td><td>No</td></tr> </table>                                                     | 1 | Yes        | 0 | No         |    |          |
| 1                                                                          | Yes                                 |                                                           |                                                                                                                                                            |   |            |   |            |    |          |
| 0                                                                          | No                                  |                                                           |                                                                                                                                                            |   |            |   |            |    |          |
| 876                                                                        | initialevaluat                      | Initial evaluation                                        | dropdown<br><table border="1"> <tr><td>1</td><td>Yes</td></tr> <tr><td>0</td><td>No</td></tr> </table>                                                     | 1 | Yes        | 0 | No         |    |          |
| 1                                                                          | Yes                                 |                                                           |                                                                                                                                                            |   |            |   |            |    |          |
| 0                                                                          | No                                  |                                                           |                                                                                                                                                            |   |            |   |            |    |          |
| 877                                                                        | sepsis_form                         | Sepsis spectrum                                           | dropdown<br><table border="1"> <tr><td>1</td><td>Yes</td></tr> <tr><td>0</td><td>No</td></tr> </table>                                                     | 1 | Yes        | 0 | No         |    |          |
| 1                                                                          | Yes                                 |                                                           |                                                                                                                                                            |   |            |   |            |    |          |
| 0                                                                          | No                                  |                                                           |                                                                                                                                                            |   |            |   |            |    |          |
| 878                                                                        | second_ev                           | Second Evaluation                                         | dropdown<br><table border="1"> <tr><td>1</td><td>Yes</td></tr> <tr><td>0</td><td>No</td></tr> </table>                                                     | 1 | Yes        | 0 | No         |    |          |
| 1                                                                          | Yes                                 |                                                           |                                                                                                                                                            |   |            |   |            |    |          |
| 0                                                                          | No                                  |                                                           |                                                                                                                                                            |   |            |   |            |    |          |
| 879                                                                        | thirdev                             | Third Evaluation                                          | dropdown<br><table border="1"> <tr><td>1</td><td>Yes</td></tr> <tr><td>0</td><td>No</td></tr> </table>                                                     | 1 | Yes        | 0 | No         |    |          |
| 1                                                                          | Yes                                 |                                                           |                                                                                                                                                            |   |            |   |            |    |          |
| 0                                                                          | No                                  |                                                           |                                                                                                                                                            |   |            |   |            |    |          |
| 880                                                                        | chest_imag_form                     | Chest Imaging                                             | dropdown<br><table border="1"> <tr><td>1</td><td>Yes</td></tr> <tr><td>0</td><td>No</td></tr> </table>                                                     | 1 | Yes        | 0 | No         |    |          |
| 1                                                                          | Yes                                 |                                                           |                                                                                                                                                            |   |            |   |            |    |          |
| 0                                                                          | No                                  |                                                           |                                                                                                                                                            |   |            |   |            |    |          |
| 881                                                                        | final_dx_form                       | Final Diagnosis                                           | dropdown<br><table border="1"> <tr><td>1</td><td>Yes</td></tr> <tr><td>0</td><td>No</td></tr> </table>                                                     | 1 | Yes        | 0 | No         |    |          |
| 1                                                                          | Yes                                 |                                                           |                                                                                                                                                            |   |            |   |            |    |          |
| 0                                                                          | No                                  |                                                           |                                                                                                                                                            |   |            |   |            |    |          |
| 882                                                                        | outcome_form                        | Outcome                                                   | dropdown<br><table border="1"> <tr><td>1</td><td>Yes</td></tr> <tr><td>0</td><td>No</td></tr> </table>                                                     | 1 | Yes        | 0 | No         |    |          |
| 1                                                                          | Yes                                 |                                                           |                                                                                                                                                            |   |            |   |            |    |          |
| 0                                                                          | No                                  |                                                           |                                                                                                                                                            |   |            |   |            |    |          |
| 883                                                                        | blood_collection                    | Blood collection                                          | dropdown<br><table border="1"> <tr><td>1</td><td>Yes</td></tr> <tr><td>0</td><td>No</td></tr> </table>                                                     | 1 | Yes        | 0 | No         |    |          |
| 1                                                                          | Yes                                 |                                                           |                                                                                                                                                            |   |            |   |            |    |          |
| 0                                                                          | No                                  |                                                           |                                                                                                                                                            |   |            |   |            |    |          |
| 884                                                                        | case_report_form_checklist_complete | Section Header: <i>Form Status</i><br>Complete?           | dropdown<br><table border="1"> <tr><td>0</td><td>Incomplete</td></tr> <tr><td>1</td><td>Unverified</td></tr> <tr><td>2</td><td>Complete</td></tr> </table> | 0 | Incomplete | 1 | Unverified | 2  | Complete |
| 0                                                                          | Incomplete                          |                                                           |                                                                                                                                                            |   |            |   |            |    |          |
| 1                                                                          | Unverified                          |                                                           |                                                                                                                                                            |   |            |   |            |    |          |
| 2                                                                          | Complete                            |                                                           |                                                                                                                                                            |   |            |   |            |    |          |
| Instrument: <b>Bal Evaluation</b> (bal_evaluation)                         |                                     |                                                           |                                                                                                                                                            |   |            |   |            |    |          |
| 885                                                                        | dateofadmission                     | Date of admission                                         | text (date_mdy)                                                                                                                                            |   |            |   |            |    |          |
| 886                                                                        | icubeforebal                        | Was the patient admitted to an ICU prior to bronchoscopy? | yesno<br><table border="1"> <tr><td>1</td><td>Yes</td></tr> <tr><td>0</td><td>No</td></tr> </table>                                                        | 1 | Yes        | 0 | No         |    |          |
| 1                                                                          | Yes                                 |                                                           |                                                                                                                                                            |   |            |   |            |    |          |
| 0                                                                          | No                                  |                                                           |                                                                                                                                                            |   |            |   |            |    |          |

|     |                                                                             |                                                                                   |                                                                                                                                                                                                                                                                                                                            |
|-----|-----------------------------------------------------------------------------|-----------------------------------------------------------------------------------|----------------------------------------------------------------------------------------------------------------------------------------------------------------------------------------------------------------------------------------------------------------------------------------------------------------------------|
| 887 | beforeicuadmission<br>Show the field ONLY if:<br>[icubeforebal] = '1'       | Date of ICU admission/transfer                                                    | text (date_mdy)                                                                                                                                                                                                                                                                                                            |
| 888 | beforeintubation                                                            | Was the patient intubated prior to bronchoscopy?                                  | yesno<br>1 Yes<br>0 No                                                                                                                                                                                                                                                                                                     |
| 889 | beforeintubationdate<br>Show the field ONLY if:<br>[beforeintubation] = '1' | Date of intubation before bronchoscopy                                            | text (date_mdy)                                                                                                                                                                                                                                                                                                            |
| 890 | date_thirdbal                                                               | Date of Procedure                                                                 | text (date_mdy)                                                                                                                                                                                                                                                                                                            |
| 891 | time_thirdbal                                                               | Time                                                                              | text (time)                                                                                                                                                                                                                                                                                                                |
| 892 | temperature3bal                                                             | Section Header: <i>Vital Signs at time of Bronchoscopy</i><br>Temperature (C)     | text                                                                                                                                                                                                                                                                                                                       |
| 893 | heart_rate3bal                                                              | Heart Rate                                                                        | text                                                                                                                                                                                                                                                                                                                       |
| 894 | respiratory_rate3bal                                                        | Respiratory Rate                                                                  | text                                                                                                                                                                                                                                                                                                                       |
| 895 | systolic3bal                                                                | Systolic Blood Pressure                                                           | text                                                                                                                                                                                                                                                                                                                       |
| 896 | diastolic_pressure3bal                                                      | Diastolic Blood Pressure                                                          | text                                                                                                                                                                                                                                                                                                                       |
| 897 | mean_blood_pressure3bal                                                     | Mean Blood Pressure                                                               | calc<br>Calculation: (((diastolic_pressure3bal)*2)/3)+([systolic3bal]/3)                                                                                                                                                                                                                                                   |
| 898 | ballocation                                                                 | Section Header: <i>Bronchoscopy Details</i><br>BAL Location(s)                    | checkbox<br>1 ballocation__1 RML<br>2 ballocation__2 Lingula<br>3 ballocation__3 RUL<br>4 ballocation__4 RLL<br>5 ballocation__5 LUL<br>6 ballocation__6 LLL                                                                                                                                                               |
| 899 | balin                                                                       | BAL Fluid In                                                                      | text                                                                                                                                                                                                                                                                                                                       |
| 900 | balout                                                                      | BAL Fluid Out                                                                     | text                                                                                                                                                                                                                                                                                                                       |
| 901 | balvisual                                                                   | BAL Visual Inspection                                                             | checkbox<br>1 balvisual__1 Purulence/Thick Secretions<br>2 balvisual__2 Bloody<br>3 balvisual__3 Gastric Contents<br>4 balvisual__4 Endobronchial Lesion                                                                                                                                                                   |
| 902 | chronicdx                                                                   | Section Header: <i>Chronic Pulmonary Diagnoses</i><br>Chronic Pulmonary Diagnoses | checkbox<br>1 chronicdx__1 COPD<br>2 chronicdx__2 Asthma<br>7 chronicdx__7 Bronchiolitis Obliterans<br>3 chronicdx__3 Bronchiectasis<br>4 chronicdx__4 Sarcoidosis<br>5 chronicdx__5 Malignancy involving lungs<br>6 chronicdx__6 ILD (Interstitial Lung Disease)<br>8 chronicdx__8 COP (Cryptogenic Organizing Pneumonia) |
| 903 | ilddx<br>Show the field ONLY if:<br>[chronicdx(6)] = '1'                    | ILD                                                                               | radio<br>1 IPF (Idiopathic UIP)<br>2 Idiopathic NSIP<br>3 Chronic HP<br>4 Rheum assoc. ILD<br>5 Eosinophilic Pneumonia<br>6 Drug-induced fibrosis<br>7 Uncharacterized fibrosis                                                                                                                                            |
| 904 | malignancytype<br>Show the field ONLY if:<br>[chronicdx(5)] = '1'           | Malignancy Type                                                                   | checkbox<br>1 malignancytype__1 NSCLC<br>2 malignancytype__2 Small Cell<br>3 malignancytype__3 Metastatic disease to lung                                                                                                                                                                                                  |

|     |                                                                  |                                                                                                                                                         |                                                                                                                                                                                                                                                                                                                                                                                                                                                                            |
|-----|------------------------------------------------------------------|---------------------------------------------------------------------------------------------------------------------------------------------------------|----------------------------------------------------------------------------------------------------------------------------------------------------------------------------------------------------------------------------------------------------------------------------------------------------------------------------------------------------------------------------------------------------------------------------------------------------------------------------|
| 905 | o2therappyn                                                      | Section Header: <i>Chronic Oxygen Therapy / Respiratory Care</i><br>Chronic O2 Therapy?                                                                 | yesno<br>1 Yes<br>0 No                                                                                                                                                                                                                                                                                                                                                                                                                                                     |
| 906 | o2type                                                           | Chronic O2/Resp therapies                                                                                                                               | checkbox<br>1 o2type__1 NC (Nasal Cannula)<br>2 o2type__2 NIPPV (Non-invasive Positive Pressure Ventilation)<br>3 o2type__3 Tracheostomy                                                                                                                                                                                                                                                                                                                                   |
| 907 | nc_flow_rate<br>Show the field ONLY if:<br>[o2type(1)] = '1'     | Liter/Min Flow Rate                                                                                                                                     | dropdown<br>1 1<br>2 2<br>3 3<br>4 4<br>5 5<br>6 6                                                                                                                                                                                                                                                                                                                                                                                                                         |
| 908 | ncwhen<br>Show the field ONLY if:<br>[o2type(1)] = '1'           | When does patient use NC?                                                                                                                               | radio<br>1 With exertion only<br>2 At night only<br>3 Continuous                                                                                                                                                                                                                                                                                                                                                                                                           |
| 909 | trachutilization<br>Show the field ONLY if:<br>[o2type(3)] = '1' | Utilization of Trach                                                                                                                                    | checkbox<br>1 trachutilization__1 Chronic ventilator therapy<br>2 trachutilization__2 Vent facility resident                                                                                                                                                                                                                                                                                                                                                               |
| 910 | acutesusdx                                                       | Acute/Suspected Diagnoses                                                                                                                               | checkbox<br>6 acutesusdx__6 Infectious Pneumonia<br>1 acutesusdx__1 COPD Flare<br>2 acutesusdx__2 Asthma Flare<br>3 acutesusdx__3 Bronchiectasis Flare<br>4 acutesusdx__4 ILD Flare<br>5 acutesusdx__5 ARDS<br>7 acutesusdx__7 Aspiration NOS<br>8 acutesusdx__8 Hemoptysis NOS<br>9 acutesusdx__9 Atelectasis/Mucous Plugging<br>10 acutesusdx__10 Pulmonary Edema<br>11 acutesusdx__11 Unknown Bilateral Infiltrates<br>12 acutesusdx__12 Unknown Unilateral infiltrates |
| 911 | balardsyn                                                        | Section Header: <i>ARDS Prediction Scores</i><br>Does the patient have ARDS at time of bronchoscopy?<br><i>If Yes, please complete ARDS at BAL form</i> | yesno<br>1 Yes<br>0 No                                                                                                                                                                                                                                                                                                                                                                                                                                                     |
| 912 | ealiscore                                                        | EALI Score                                                                                                                                              | radio<br>1 1<br>2 2<br>3 3<br>4 4                                                                                                                                                                                                                                                                                                                                                                                                                                          |
| 913 | lipsscore                                                        | LIPS Score                                                                                                                                              | text (number)                                                                                                                                                                                                                                                                                                                                                                                                                                                              |
| 914 | balinspection                                                    | Section Header: <i>BAL Procedure</i><br>Bronchoscopy Inspection Characteristics                                                                         | checkbox<br>1 balinspection__1 Purulent secretions without airway obstruction<br>2 balinspection__2 Purulent secretions with airway obstruction<br>3 balinspection__3 Blood<br>4 balinspection__4 Gastric Contents<br>5 balinspection__5 Endobronchial lesions without airway obstruction<br>6 balinspection__6 Endobronchial lesions with airway obstruction                                                                                                              |

|     |                                                                  |                                                                 |                                                                                                                                                                                                                                                                                                                                                                                                                                       |   |                               |     |                 |                        |         |   |                        |     |   |                        |     |   |                        |     |   |                        |     |
|-----|------------------------------------------------------------------|-----------------------------------------------------------------|---------------------------------------------------------------------------------------------------------------------------------------------------------------------------------------------------------------------------------------------------------------------------------------------------------------------------------------------------------------------------------------------------------------------------------------|---|-------------------------------|-----|-----------------|------------------------|---------|---|------------------------|-----|---|------------------------|-----|---|------------------------|-----|---|------------------------|-----|
| 915 | ballobelocation                                                  | BAL Location(s)                                                 | checkbox<br><table border="1"> <tr><td>1</td><td>ballobelocation__1</td><td>RML</td></tr> <tr><td>2</td><td>ballobelocation__2</td><td>Lingula</td></tr> <tr><td>3</td><td>ballobelocation__3</td><td>RUL</td></tr> <tr><td>4</td><td>ballobelocation__4</td><td>RLL</td></tr> <tr><td>5</td><td>ballobelocation__5</td><td>LUL</td></tr> <tr><td>6</td><td>ballobelocation__6</td><td>LLL</td></tr> </table>                         | 1 | ballobelocation__1            | RML | 2               | ballobelocation__2     | Lingula | 3 | ballobelocation__3     | RUL | 4 | ballobelocation__4     | RLL | 5 | ballobelocation__5     | LUL | 6 | ballobelocation__6     | LLL |
| 1   | ballobelocation__1                                               | RML                                                             |                                                                                                                                                                                                                                                                                                                                                                                                                                       |   |                               |     |                 |                        |         |   |                        |     |   |                        |     |   |                        |     |   |                        |     |
| 2   | ballobelocation__2                                               | Lingula                                                         |                                                                                                                                                                                                                                                                                                                                                                                                                                       |   |                               |     |                 |                        |         |   |                        |     |   |                        |     |   |                        |     |   |                        |     |
| 3   | ballobelocation__3                                               | RUL                                                             |                                                                                                                                                                                                                                                                                                                                                                                                                                       |   |                               |     |                 |                        |         |   |                        |     |   |                        |     |   |                        |     |   |                        |     |
| 4   | ballobelocation__4                                               | RLL                                                             |                                                                                                                                                                                                                                                                                                                                                                                                                                       |   |                               |     |                 |                        |         |   |                        |     |   |                        |     |   |                        |     |   |                        |     |
| 5   | ballobelocation__5                                               | LUL                                                             |                                                                                                                                                                                                                                                                                                                                                                                                                                       |   |                               |     |                 |                        |         |   |                        |     |   |                        |     |   |                        |     |   |                        |     |
| 6   | ballobelocation__6                                               | LLL                                                             |                                                                                                                                                                                                                                                                                                                                                                                                                                       |   |                               |     |                 |                        |         |   |                        |     |   |                        |     |   |                        |     |   |                        |     |
| 916 | balfluidin                                                       | BAL Fluid In<br><i>mL</i>                                       | text (number)                                                                                                                                                                                                                                                                                                                                                                                                                         |   |                               |     |                 |                        |         |   |                        |     |   |                        |     |   |                        |     |   |                        |     |
| 917 | balfluidout                                                      | BAL Fluid Out<br><i>mL</i>                                      | text (number)                                                                                                                                                                                                                                                                                                                                                                                                                         |   |                               |     |                 |                        |         |   |                        |     |   |                        |     |   |                        |     |   |                        |     |
| 918 | bronchbleedlocation                                              | Focal Bleeding Location(s)                                      | checkbox<br><table border="1"> <tr><td>1</td><td>bronchbleedlocation__1</td><td>RML</td></tr> <tr><td>2</td><td>bronchbleedlocation__2</td><td>Lingula</td></tr> <tr><td>3</td><td>bronchbleedlocation__3</td><td>RUL</td></tr> <tr><td>4</td><td>bronchbleedlocation__4</td><td>RLL</td></tr> <tr><td>5</td><td>bronchbleedlocation__5</td><td>LUL</td></tr> <tr><td>6</td><td>bronchbleedlocation__6</td><td>LLL</td></tr> </table> | 1 | bronchbleedlocation__1        | RML | 2               | bronchbleedlocation__2 | Lingula | 3 | bronchbleedlocation__3 | RUL | 4 | bronchbleedlocation__4 | RLL | 5 | bronchbleedlocation__5 | LUL | 6 | bronchbleedlocation__6 | LLL |
| 1   | bronchbleedlocation__1                                           | RML                                                             |                                                                                                                                                                                                                                                                                                                                                                                                                                       |   |                               |     |                 |                        |         |   |                        |     |   |                        |     |   |                        |     |   |                        |     |
| 2   | bronchbleedlocation__2                                           | Lingula                                                         |                                                                                                                                                                                                                                                                                                                                                                                                                                       |   |                               |     |                 |                        |         |   |                        |     |   |                        |     |   |                        |     |   |                        |     |
| 3   | bronchbleedlocation__3                                           | RUL                                                             |                                                                                                                                                                                                                                                                                                                                                                                                                                       |   |                               |     |                 |                        |         |   |                        |     |   |                        |     |   |                        |     |   |                        |     |
| 4   | bronchbleedlocation__4                                           | RLL                                                             |                                                                                                                                                                                                                                                                                                                                                                                                                                       |   |                               |     |                 |                        |         |   |                        |     |   |                        |     |   |                        |     |   |                        |     |
| 5   | bronchbleedlocation__5                                           | LUL                                                             |                                                                                                                                                                                                                                                                                                                                                                                                                                       |   |                               |     |                 |                        |         |   |                        |     |   |                        |     |   |                        |     |   |                        |     |
| 6   | bronchbleedlocation__6                                           | LLL                                                             |                                                                                                                                                                                                                                                                                                                                                                                                                                       |   |                               |     |                 |                        |         |   |                        |     |   |                        |     |   |                        |     |   |                        |     |
| 919 | baldah                                                           | Diagnosis of DAH<br><i>Sequentially bloodier aliquots?</i>      | yesno<br><table border="1"> <tr><td>1</td><td>Yes</td></tr> <tr><td>0</td><td>No</td></tr> </table>                                                                                                                                                                                                                                                                                                                                   | 1 | Yes                           | 0   | No              |                        |         |   |                        |     |   |                        |     |   |                        |     |   |                        |     |
| 1   | Yes                                                              |                                                                 |                                                                                                                                                                                                                                                                                                                                                                                                                                       |   |                               |     |                 |                        |         |   |                        |     |   |                        |     |   |                        |     |   |                        |     |
| 0   | No                                                               |                                                                 |                                                                                                                                                                                                                                                                                                                                                                                                                                       |   |                               |     |                 |                        |         |   |                        |     |   |                        |     |   |                        |     |   |                        |     |
| 920 | balcellcountyn                                                   | Section Header: <i>BAL Test Results</i><br>BAL Cell Count Done? | yesno<br><table border="1"> <tr><td>1</td><td>Yes</td></tr> <tr><td>0</td><td>No</td></tr> </table>                                                                                                                                                                                                                                                                                                                                   | 1 | Yes                           | 0   | No              |                        |         |   |                        |     |   |                        |     |   |                        |     |   |                        |     |
| 1   | Yes                                                              |                                                                 |                                                                                                                                                                                                                                                                                                                                                                                                                                       |   |                               |     |                 |                        |         |   |                        |     |   |                        |     |   |                        |     |   |                        |     |
| 0   | No                                                               |                                                                 |                                                                                                                                                                                                                                                                                                                                                                                                                                       |   |                               |     |                 |                        |         |   |                        |     |   |                        |     |   |                        |     |   |                        |     |
| 921 | balrbccount<br>Show the field ONLY if:<br>[balcellcountyn] = '1' | RBC Count                                                       | text (number)                                                                                                                                                                                                                                                                                                                                                                                                                         |   |                               |     |                 |                        |         |   |                        |     |   |                        |     |   |                        |     |   |                        |     |
| 922 | balwbccount<br>Show the field ONLY if:<br>[balcellcountyn] = '1' | WBC Count Total                                                 | text (number)                                                                                                                                                                                                                                                                                                                                                                                                                         |   |                               |     |                 |                        |         |   |                        |     |   |                        |     |   |                        |     |   |                        |     |
| 923 | balpmn<br>Show the field ONLY if:<br>[balcellcountyn] = '1'      | PMN %                                                           | text (number, Min: 0, Max: 100)                                                                                                                                                                                                                                                                                                                                                                                                       |   |                               |     |                 |                        |         |   |                        |     |   |                        |     |   |                        |     |   |                        |     |
| 924 | ballymph<br>Show the field ONLY if:<br>[balcellcountyn] = '1'    | Lymph %                                                         | text (number, Max: 100)                                                                                                                                                                                                                                                                                                                                                                                                               |   |                               |     |                 |                        |         |   |                        |     |   |                        |     |   |                        |     |   |                        |     |
| 925 | baleos<br>Show the field ONLY if:<br>[balcellcountyn] = '1'      | Eosinophil %                                                    | text (number, Max: 100)                                                                                                                                                                                                                                                                                                                                                                                                               |   |                               |     |                 |                        |         |   |                        |     |   |                        |     |   |                        |     |   |                        |     |
| 926 | balmacro<br>Show the field ONLY if:<br>[balcellcountyn] = '1'    | Monocyte/Macrophages %                                          | text (number, Max: 100)                                                                                                                                                                                                                                                                                                                                                                                                               |   |                               |     |                 |                        |         |   |                        |     |   |                        |     |   |                        |     |   |                        |     |
| 927 | balatypical<br>Show the field ONLY if:<br>[balcellcountyn] = '1' | Atypical Cells %                                                | text (number, Max: 100)                                                                                                                                                                                                                                                                                                                                                                                                               |   |                               |     |                 |                        |         |   |                        |     |   |                        |     |   |                        |     |   |                        |     |
| 928 | balbaccxyn                                                       | BAL Bacterial Culture Sent?                                     | radio<br><table border="1"> <tr><td>1</td><td>Yes, with positive results...</td></tr> <tr><td>2</td><td>Yes, no growth.</td></tr> <tr><td>3</td><td>No.</td></tr> </table>                                                                                                                                                                                                                                                            | 1 | Yes, with positive results... | 2   | Yes, no growth. | 3                      | No.     |   |                        |     |   |                        |     |   |                        |     |   |                        |     |
| 1   | Yes, with positive results...                                    |                                                                 |                                                                                                                                                                                                                                                                                                                                                                                                                                       |   |                               |     |                 |                        |         |   |                        |     |   |                        |     |   |                        |     |   |                        |     |
| 2   | Yes, no growth.                                                  |                                                                 |                                                                                                                                                                                                                                                                                                                                                                                                                                       |   |                               |     |                 |                        |         |   |                        |     |   |                        |     |   |                        |     |   |                        |     |
| 3   | No.                                                              |                                                                 |                                                                                                                                                                                                                                                                                                                                                                                                                                       |   |                               |     |                 |                        |         |   |                        |     |   |                        |     |   |                        |     |   |                        |     |

|     |                                                                         |                                                                                                         |                                                                                                                                                                                                                                                                                                                                                                                                                                                                                                                                                                                                                                                                                                                                                                                                                                                                                                                                                                                                                                                                                                                                                                                                                                                                                                                                                                                                                                                                                                                                                                                                                                                                                                                                                                                                                                                                                                                                                                                                                                                                                                                                                                                                                                                                                                                                                                                                                                                                                                                                                                                                                                                                   |   |                               |                              |                           |                          |                              |   |            |                              |   |            |                            |   |            |                                    |   |            |                          |   |            |                        |   |            |                         |   |            |                        |    |             |                               |    |             |                      |    |             |                     |    |             |                  |    |             |                     |    |             |                       |    |             |                    |    |             |                       |    |             |                      |    |             |                    |    |             |                       |    |             |                    |    |             |                        |    |             |                 |    |             |                     |    |             |                    |    |             |                  |    |             |                                       |    |             |                  |    |             |                             |    |             |                     |    |             |                     |    |             |                       |    |             |                            |    |             |                            |    |             |                          |
|-----|-------------------------------------------------------------------------|---------------------------------------------------------------------------------------------------------|-------------------------------------------------------------------------------------------------------------------------------------------------------------------------------------------------------------------------------------------------------------------------------------------------------------------------------------------------------------------------------------------------------------------------------------------------------------------------------------------------------------------------------------------------------------------------------------------------------------------------------------------------------------------------------------------------------------------------------------------------------------------------------------------------------------------------------------------------------------------------------------------------------------------------------------------------------------------------------------------------------------------------------------------------------------------------------------------------------------------------------------------------------------------------------------------------------------------------------------------------------------------------------------------------------------------------------------------------------------------------------------------------------------------------------------------------------------------------------------------------------------------------------------------------------------------------------------------------------------------------------------------------------------------------------------------------------------------------------------------------------------------------------------------------------------------------------------------------------------------------------------------------------------------------------------------------------------------------------------------------------------------------------------------------------------------------------------------------------------------------------------------------------------------------------------------------------------------------------------------------------------------------------------------------------------------------------------------------------------------------------------------------------------------------------------------------------------------------------------------------------------------------------------------------------------------------------------------------------------------------------------------------------------------|---|-------------------------------|------------------------------|---------------------------|--------------------------|------------------------------|---|------------|------------------------------|---|------------|----------------------------|---|------------|------------------------------------|---|------------|--------------------------|---|------------|------------------------|---|------------|-------------------------|---|------------|------------------------|----|-------------|-------------------------------|----|-------------|----------------------|----|-------------|---------------------|----|-------------|------------------|----|-------------|---------------------|----|-------------|-----------------------|----|-------------|--------------------|----|-------------|-----------------------|----|-------------|----------------------|----|-------------|--------------------|----|-------------|-----------------------|----|-------------|--------------------|----|-------------|------------------------|----|-------------|-----------------|----|-------------|---------------------|----|-------------|--------------------|----|-------------|------------------|----|-------------|---------------------------------------|----|-------------|------------------|----|-------------|-----------------------------|----|-------------|---------------------|----|-------------|---------------------|----|-------------|-----------------------|----|-------------|----------------------------|----|-------------|----------------------------|----|-------------|--------------------------|
| 929 | balbccx<br>Show the field ONLY if:<br>[balbccyn] = '1'                  | BAL Bacterial Culture Results<br><i>Check all clinically significant growth (1x10<sup>4</sup> CFUs)</i> | checkbox, Required<br><table border="1"> <tr><td>1</td><td>balbccx__1</td><td>Staphylococcus aureus (MSSA)</td></tr> <tr><td>2</td><td>balbccx__2</td><td>Staphylococcus aureus (MRSA)</td></tr> <tr><td>3</td><td>balbccx__3</td><td>Staphylococcus aureus (VRSA)</td></tr> <tr><td>4</td><td>balbccx__4</td><td>Staphylococcus epidermidis</td></tr> <tr><td>5</td><td>balbccx__5</td><td>Other Staphylococcus coagulase neg</td></tr> <tr><td>6</td><td>balbccx__6</td><td>Streptococcus pneumoniae</td></tr> <tr><td>7</td><td>balbccx__7</td><td>Streptococcus pyogenes</td></tr> <tr><td>8</td><td>balbccx__8</td><td>Streptococcus agalactie</td></tr> <tr><td>9</td><td>balbccx__9</td><td>Streptococcus viridans</td></tr> <tr><td>10</td><td>balbccx__10</td><td>Streptococcus, other specises</td></tr> <tr><td>11</td><td>balbccx__11</td><td>Enterococcus species</td></tr> <tr><td>12</td><td>balbccx__12</td><td>Other Gram positive</td></tr> <tr><td>13</td><td>balbccx__13</td><td>Escherichia coli</td></tr> <tr><td>14</td><td>balbccx__14</td><td>Pseudomonas species</td></tr> <tr><td>15</td><td>balbccx__15</td><td>Hemophilus influenzae</td></tr> <tr><td>16</td><td>balbccx__16</td><td>Klebsiella species</td></tr> <tr><td>17</td><td>balbccx__17</td><td>Acinetobacter species</td></tr> <tr><td>18</td><td>balbccx__18</td><td>Enterobacter species</td></tr> <tr><td>19</td><td>balbccx__19</td><td>Legionella species</td></tr> <tr><td>20</td><td>balbccx__20</td><td>Moraxella catarrhalis</td></tr> <tr><td>21</td><td>balbccx__21</td><td>Morganella species</td></tr> <tr><td>22</td><td>balbccx__22</td><td>Neisseria meningitides</td></tr> <tr><td>23</td><td>balbccx__23</td><td>Proteus species</td></tr> <tr><td>24</td><td>balbccx__24</td><td>Citrobacter species</td></tr> <tr><td>25</td><td>balbccx__25</td><td>Salmonella species</td></tr> <tr><td>26</td><td>balbccx__26</td><td>Serratia species</td></tr> <tr><td>27</td><td>balbccx__27</td><td>Sternotrophomonas/Xanthomonas species</td></tr> <tr><td>28</td><td>balbccx__28</td><td>Yersinia species</td></tr> <tr><td>29</td><td>balbccx__29</td><td>Other Gram negative species</td></tr> <tr><td>30</td><td>balbccx__30</td><td>Actinomyces species</td></tr> <tr><td>31</td><td>balbccx__31</td><td>Bacteriodes species</td></tr> <tr><td>32</td><td>balbccx__32</td><td>Clostridium difficile</td></tr> <tr><td>33</td><td>balbccx__33</td><td>Clostridium, other species</td></tr> <tr><td>34</td><td>balbccx__34</td><td>Peptostreptococcus species</td></tr> <tr><td>35</td><td>balbccx__35</td><td>Other anaerobic bacteria</td></tr> </table> | 1 | balbccx__1                    | Staphylococcus aureus (MSSA) | 2                         | balbccx__2               | Staphylococcus aureus (MRSA) | 3 | balbccx__3 | Staphylococcus aureus (VRSA) | 4 | balbccx__4 | Staphylococcus epidermidis | 5 | balbccx__5 | Other Staphylococcus coagulase neg | 6 | balbccx__6 | Streptococcus pneumoniae | 7 | balbccx__7 | Streptococcus pyogenes | 8 | balbccx__8 | Streptococcus agalactie | 9 | balbccx__9 | Streptococcus viridans | 10 | balbccx__10 | Streptococcus, other specises | 11 | balbccx__11 | Enterococcus species | 12 | balbccx__12 | Other Gram positive | 13 | balbccx__13 | Escherichia coli | 14 | balbccx__14 | Pseudomonas species | 15 | balbccx__15 | Hemophilus influenzae | 16 | balbccx__16 | Klebsiella species | 17 | balbccx__17 | Acinetobacter species | 18 | balbccx__18 | Enterobacter species | 19 | balbccx__19 | Legionella species | 20 | balbccx__20 | Moraxella catarrhalis | 21 | balbccx__21 | Morganella species | 22 | balbccx__22 | Neisseria meningitides | 23 | balbccx__23 | Proteus species | 24 | balbccx__24 | Citrobacter species | 25 | balbccx__25 | Salmonella species | 26 | balbccx__26 | Serratia species | 27 | balbccx__27 | Sternotrophomonas/Xanthomonas species | 28 | balbccx__28 | Yersinia species | 29 | balbccx__29 | Other Gram negative species | 30 | balbccx__30 | Actinomyces species | 31 | balbccx__31 | Bacteriodes species | 32 | balbccx__32 | Clostridium difficile | 33 | balbccx__33 | Clostridium, other species | 34 | balbccx__34 | Peptostreptococcus species | 35 | balbccx__35 | Other anaerobic bacteria |
| 1   | balbccx__1                                                              | Staphylococcus aureus (MSSA)                                                                            |                                                                                                                                                                                                                                                                                                                                                                                                                                                                                                                                                                                                                                                                                                                                                                                                                                                                                                                                                                                                                                                                                                                                                                                                                                                                                                                                                                                                                                                                                                                                                                                                                                                                                                                                                                                                                                                                                                                                                                                                                                                                                                                                                                                                                                                                                                                                                                                                                                                                                                                                                                                                                                                                   |   |                               |                              |                           |                          |                              |   |            |                              |   |            |                            |   |            |                                    |   |            |                          |   |            |                        |   |            |                         |   |            |                        |    |             |                               |    |             |                      |    |             |                     |    |             |                  |    |             |                     |    |             |                       |    |             |                    |    |             |                       |    |             |                      |    |             |                    |    |             |                       |    |             |                    |    |             |                        |    |             |                 |    |             |                     |    |             |                    |    |             |                  |    |             |                                       |    |             |                  |    |             |                             |    |             |                     |    |             |                     |    |             |                       |    |             |                            |    |             |                            |    |             |                          |
| 2   | balbccx__2                                                              | Staphylococcus aureus (MRSA)                                                                            |                                                                                                                                                                                                                                                                                                                                                                                                                                                                                                                                                                                                                                                                                                                                                                                                                                                                                                                                                                                                                                                                                                                                                                                                                                                                                                                                                                                                                                                                                                                                                                                                                                                                                                                                                                                                                                                                                                                                                                                                                                                                                                                                                                                                                                                                                                                                                                                                                                                                                                                                                                                                                                                                   |   |                               |                              |                           |                          |                              |   |            |                              |   |            |                            |   |            |                                    |   |            |                          |   |            |                        |   |            |                         |   |            |                        |    |             |                               |    |             |                      |    |             |                     |    |             |                  |    |             |                     |    |             |                       |    |             |                    |    |             |                       |    |             |                      |    |             |                    |    |             |                       |    |             |                    |    |             |                        |    |             |                 |    |             |                     |    |             |                    |    |             |                  |    |             |                                       |    |             |                  |    |             |                             |    |             |                     |    |             |                     |    |             |                       |    |             |                            |    |             |                            |    |             |                          |
| 3   | balbccx__3                                                              | Staphylococcus aureus (VRSA)                                                                            |                                                                                                                                                                                                                                                                                                                                                                                                                                                                                                                                                                                                                                                                                                                                                                                                                                                                                                                                                                                                                                                                                                                                                                                                                                                                                                                                                                                                                                                                                                                                                                                                                                                                                                                                                                                                                                                                                                                                                                                                                                                                                                                                                                                                                                                                                                                                                                                                                                                                                                                                                                                                                                                                   |   |                               |                              |                           |                          |                              |   |            |                              |   |            |                            |   |            |                                    |   |            |                          |   |            |                        |   |            |                         |   |            |                        |    |             |                               |    |             |                      |    |             |                     |    |             |                  |    |             |                     |    |             |                       |    |             |                    |    |             |                       |    |             |                      |    |             |                    |    |             |                       |    |             |                    |    |             |                        |    |             |                 |    |             |                     |    |             |                    |    |             |                  |    |             |                                       |    |             |                  |    |             |                             |    |             |                     |    |             |                     |    |             |                       |    |             |                            |    |             |                            |    |             |                          |
| 4   | balbccx__4                                                              | Staphylococcus epidermidis                                                                              |                                                                                                                                                                                                                                                                                                                                                                                                                                                                                                                                                                                                                                                                                                                                                                                                                                                                                                                                                                                                                                                                                                                                                                                                                                                                                                                                                                                                                                                                                                                                                                                                                                                                                                                                                                                                                                                                                                                                                                                                                                                                                                                                                                                                                                                                                                                                                                                                                                                                                                                                                                                                                                                                   |   |                               |                              |                           |                          |                              |   |            |                              |   |            |                            |   |            |                                    |   |            |                          |   |            |                        |   |            |                         |   |            |                        |    |             |                               |    |             |                      |    |             |                     |    |             |                  |    |             |                     |    |             |                       |    |             |                    |    |             |                       |    |             |                      |    |             |                    |    |             |                       |    |             |                    |    |             |                        |    |             |                 |    |             |                     |    |             |                    |    |             |                  |    |             |                                       |    |             |                  |    |             |                             |    |             |                     |    |             |                     |    |             |                       |    |             |                            |    |             |                            |    |             |                          |
| 5   | balbccx__5                                                              | Other Staphylococcus coagulase neg                                                                      |                                                                                                                                                                                                                                                                                                                                                                                                                                                                                                                                                                                                                                                                                                                                                                                                                                                                                                                                                                                                                                                                                                                                                                                                                                                                                                                                                                                                                                                                                                                                                                                                                                                                                                                                                                                                                                                                                                                                                                                                                                                                                                                                                                                                                                                                                                                                                                                                                                                                                                                                                                                                                                                                   |   |                               |                              |                           |                          |                              |   |            |                              |   |            |                            |   |            |                                    |   |            |                          |   |            |                        |   |            |                         |   |            |                        |    |             |                               |    |             |                      |    |             |                     |    |             |                  |    |             |                     |    |             |                       |    |             |                    |    |             |                       |    |             |                      |    |             |                    |    |             |                       |    |             |                    |    |             |                        |    |             |                 |    |             |                     |    |             |                    |    |             |                  |    |             |                                       |    |             |                  |    |             |                             |    |             |                     |    |             |                     |    |             |                       |    |             |                            |    |             |                            |    |             |                          |
| 6   | balbccx__6                                                              | Streptococcus pneumoniae                                                                                |                                                                                                                                                                                                                                                                                                                                                                                                                                                                                                                                                                                                                                                                                                                                                                                                                                                                                                                                                                                                                                                                                                                                                                                                                                                                                                                                                                                                                                                                                                                                                                                                                                                                                                                                                                                                                                                                                                                                                                                                                                                                                                                                                                                                                                                                                                                                                                                                                                                                                                                                                                                                                                                                   |   |                               |                              |                           |                          |                              |   |            |                              |   |            |                            |   |            |                                    |   |            |                          |   |            |                        |   |            |                         |   |            |                        |    |             |                               |    |             |                      |    |             |                     |    |             |                  |    |             |                     |    |             |                       |    |             |                    |    |             |                       |    |             |                      |    |             |                    |    |             |                       |    |             |                    |    |             |                        |    |             |                 |    |             |                     |    |             |                    |    |             |                  |    |             |                                       |    |             |                  |    |             |                             |    |             |                     |    |             |                     |    |             |                       |    |             |                            |    |             |                            |    |             |                          |
| 7   | balbccx__7                                                              | Streptococcus pyogenes                                                                                  |                                                                                                                                                                                                                                                                                                                                                                                                                                                                                                                                                                                                                                                                                                                                                                                                                                                                                                                                                                                                                                                                                                                                                                                                                                                                                                                                                                                                                                                                                                                                                                                                                                                                                                                                                                                                                                                                                                                                                                                                                                                                                                                                                                                                                                                                                                                                                                                                                                                                                                                                                                                                                                                                   |   |                               |                              |                           |                          |                              |   |            |                              |   |            |                            |   |            |                                    |   |            |                          |   |            |                        |   |            |                         |   |            |                        |    |             |                               |    |             |                      |    |             |                     |    |             |                  |    |             |                     |    |             |                       |    |             |                    |    |             |                       |    |             |                      |    |             |                    |    |             |                       |    |             |                    |    |             |                        |    |             |                 |    |             |                     |    |             |                    |    |             |                  |    |             |                                       |    |             |                  |    |             |                             |    |             |                     |    |             |                     |    |             |                       |    |             |                            |    |             |                            |    |             |                          |
| 8   | balbccx__8                                                              | Streptococcus agalactie                                                                                 |                                                                                                                                                                                                                                                                                                                                                                                                                                                                                                                                                                                                                                                                                                                                                                                                                                                                                                                                                                                                                                                                                                                                                                                                                                                                                                                                                                                                                                                                                                                                                                                                                                                                                                                                                                                                                                                                                                                                                                                                                                                                                                                                                                                                                                                                                                                                                                                                                                                                                                                                                                                                                                                                   |   |                               |                              |                           |                          |                              |   |            |                              |   |            |                            |   |            |                                    |   |            |                          |   |            |                        |   |            |                         |   |            |                        |    |             |                               |    |             |                      |    |             |                     |    |             |                  |    |             |                     |    |             |                       |    |             |                    |    |             |                       |    |             |                      |    |             |                    |    |             |                       |    |             |                    |    |             |                        |    |             |                 |    |             |                     |    |             |                    |    |             |                  |    |             |                                       |    |             |                  |    |             |                             |    |             |                     |    |             |                     |    |             |                       |    |             |                            |    |             |                            |    |             |                          |
| 9   | balbccx__9                                                              | Streptococcus viridans                                                                                  |                                                                                                                                                                                                                                                                                                                                                                                                                                                                                                                                                                                                                                                                                                                                                                                                                                                                                                                                                                                                                                                                                                                                                                                                                                                                                                                                                                                                                                                                                                                                                                                                                                                                                                                                                                                                                                                                                                                                                                                                                                                                                                                                                                                                                                                                                                                                                                                                                                                                                                                                                                                                                                                                   |   |                               |                              |                           |                          |                              |   |            |                              |   |            |                            |   |            |                                    |   |            |                          |   |            |                        |   |            |                         |   |            |                        |    |             |                               |    |             |                      |    |             |                     |    |             |                  |    |             |                     |    |             |                       |    |             |                    |    |             |                       |    |             |                      |    |             |                    |    |             |                       |    |             |                    |    |             |                        |    |             |                 |    |             |                     |    |             |                    |    |             |                  |    |             |                                       |    |             |                  |    |             |                             |    |             |                     |    |             |                     |    |             |                       |    |             |                            |    |             |                            |    |             |                          |
| 10  | balbccx__10                                                             | Streptococcus, other specises                                                                           |                                                                                                                                                                                                                                                                                                                                                                                                                                                                                                                                                                                                                                                                                                                                                                                                                                                                                                                                                                                                                                                                                                                                                                                                                                                                                                                                                                                                                                                                                                                                                                                                                                                                                                                                                                                                                                                                                                                                                                                                                                                                                                                                                                                                                                                                                                                                                                                                                                                                                                                                                                                                                                                                   |   |                               |                              |                           |                          |                              |   |            |                              |   |            |                            |   |            |                                    |   |            |                          |   |            |                        |   |            |                         |   |            |                        |    |             |                               |    |             |                      |    |             |                     |    |             |                  |    |             |                     |    |             |                       |    |             |                    |    |             |                       |    |             |                      |    |             |                    |    |             |                       |    |             |                    |    |             |                        |    |             |                 |    |             |                     |    |             |                    |    |             |                  |    |             |                                       |    |             |                  |    |             |                             |    |             |                     |    |             |                     |    |             |                       |    |             |                            |    |             |                            |    |             |                          |
| 11  | balbccx__11                                                             | Enterococcus species                                                                                    |                                                                                                                                                                                                                                                                                                                                                                                                                                                                                                                                                                                                                                                                                                                                                                                                                                                                                                                                                                                                                                                                                                                                                                                                                                                                                                                                                                                                                                                                                                                                                                                                                                                                                                                                                                                                                                                                                                                                                                                                                                                                                                                                                                                                                                                                                                                                                                                                                                                                                                                                                                                                                                                                   |   |                               |                              |                           |                          |                              |   |            |                              |   |            |                            |   |            |                                    |   |            |                          |   |            |                        |   |            |                         |   |            |                        |    |             |                               |    |             |                      |    |             |                     |    |             |                  |    |             |                     |    |             |                       |    |             |                    |    |             |                       |    |             |                      |    |             |                    |    |             |                       |    |             |                    |    |             |                        |    |             |                 |    |             |                     |    |             |                    |    |             |                  |    |             |                                       |    |             |                  |    |             |                             |    |             |                     |    |             |                     |    |             |                       |    |             |                            |    |             |                            |    |             |                          |
| 12  | balbccx__12                                                             | Other Gram positive                                                                                     |                                                                                                                                                                                                                                                                                                                                                                                                                                                                                                                                                                                                                                                                                                                                                                                                                                                                                                                                                                                                                                                                                                                                                                                                                                                                                                                                                                                                                                                                                                                                                                                                                                                                                                                                                                                                                                                                                                                                                                                                                                                                                                                                                                                                                                                                                                                                                                                                                                                                                                                                                                                                                                                                   |   |                               |                              |                           |                          |                              |   |            |                              |   |            |                            |   |            |                                    |   |            |                          |   |            |                        |   |            |                         |   |            |                        |    |             |                               |    |             |                      |    |             |                     |    |             |                  |    |             |                     |    |             |                       |    |             |                    |    |             |                       |    |             |                      |    |             |                    |    |             |                       |    |             |                    |    |             |                        |    |             |                 |    |             |                     |    |             |                    |    |             |                  |    |             |                                       |    |             |                  |    |             |                             |    |             |                     |    |             |                     |    |             |                       |    |             |                            |    |             |                            |    |             |                          |
| 13  | balbccx__13                                                             | Escherichia coli                                                                                        |                                                                                                                                                                                                                                                                                                                                                                                                                                                                                                                                                                                                                                                                                                                                                                                                                                                                                                                                                                                                                                                                                                                                                                                                                                                                                                                                                                                                                                                                                                                                                                                                                                                                                                                                                                                                                                                                                                                                                                                                                                                                                                                                                                                                                                                                                                                                                                                                                                                                                                                                                                                                                                                                   |   |                               |                              |                           |                          |                              |   |            |                              |   |            |                            |   |            |                                    |   |            |                          |   |            |                        |   |            |                         |   |            |                        |    |             |                               |    |             |                      |    |             |                     |    |             |                  |    |             |                     |    |             |                       |    |             |                    |    |             |                       |    |             |                      |    |             |                    |    |             |                       |    |             |                    |    |             |                        |    |             |                 |    |             |                     |    |             |                    |    |             |                  |    |             |                                       |    |             |                  |    |             |                             |    |             |                     |    |             |                     |    |             |                       |    |             |                            |    |             |                            |    |             |                          |
| 14  | balbccx__14                                                             | Pseudomonas species                                                                                     |                                                                                                                                                                                                                                                                                                                                                                                                                                                                                                                                                                                                                                                                                                                                                                                                                                                                                                                                                                                                                                                                                                                                                                                                                                                                                                                                                                                                                                                                                                                                                                                                                                                                                                                                                                                                                                                                                                                                                                                                                                                                                                                                                                                                                                                                                                                                                                                                                                                                                                                                                                                                                                                                   |   |                               |                              |                           |                          |                              |   |            |                              |   |            |                            |   |            |                                    |   |            |                          |   |            |                        |   |            |                         |   |            |                        |    |             |                               |    |             |                      |    |             |                     |    |             |                  |    |             |                     |    |             |                       |    |             |                    |    |             |                       |    |             |                      |    |             |                    |    |             |                       |    |             |                    |    |             |                        |    |             |                 |    |             |                     |    |             |                    |    |             |                  |    |             |                                       |    |             |                  |    |             |                             |    |             |                     |    |             |                     |    |             |                       |    |             |                            |    |             |                            |    |             |                          |
| 15  | balbccx__15                                                             | Hemophilus influenzae                                                                                   |                                                                                                                                                                                                                                                                                                                                                                                                                                                                                                                                                                                                                                                                                                                                                                                                                                                                                                                                                                                                                                                                                                                                                                                                                                                                                                                                                                                                                                                                                                                                                                                                                                                                                                                                                                                                                                                                                                                                                                                                                                                                                                                                                                                                                                                                                                                                                                                                                                                                                                                                                                                                                                                                   |   |                               |                              |                           |                          |                              |   |            |                              |   |            |                            |   |            |                                    |   |            |                          |   |            |                        |   |            |                         |   |            |                        |    |             |                               |    |             |                      |    |             |                     |    |             |                  |    |             |                     |    |             |                       |    |             |                    |    |             |                       |    |             |                      |    |             |                    |    |             |                       |    |             |                    |    |             |                        |    |             |                 |    |             |                     |    |             |                    |    |             |                  |    |             |                                       |    |             |                  |    |             |                             |    |             |                     |    |             |                     |    |             |                       |    |             |                            |    |             |                            |    |             |                          |
| 16  | balbccx__16                                                             | Klebsiella species                                                                                      |                                                                                                                                                                                                                                                                                                                                                                                                                                                                                                                                                                                                                                                                                                                                                                                                                                                                                                                                                                                                                                                                                                                                                                                                                                                                                                                                                                                                                                                                                                                                                                                                                                                                                                                                                                                                                                                                                                                                                                                                                                                                                                                                                                                                                                                                                                                                                                                                                                                                                                                                                                                                                                                                   |   |                               |                              |                           |                          |                              |   |            |                              |   |            |                            |   |            |                                    |   |            |                          |   |            |                        |   |            |                         |   |            |                        |    |             |                               |    |             |                      |    |             |                     |    |             |                  |    |             |                     |    |             |                       |    |             |                    |    |             |                       |    |             |                      |    |             |                    |    |             |                       |    |             |                    |    |             |                        |    |             |                 |    |             |                     |    |             |                    |    |             |                  |    |             |                                       |    |             |                  |    |             |                             |    |             |                     |    |             |                     |    |             |                       |    |             |                            |    |             |                            |    |             |                          |
| 17  | balbccx__17                                                             | Acinetobacter species                                                                                   |                                                                                                                                                                                                                                                                                                                                                                                                                                                                                                                                                                                                                                                                                                                                                                                                                                                                                                                                                                                                                                                                                                                                                                                                                                                                                                                                                                                                                                                                                                                                                                                                                                                                                                                                                                                                                                                                                                                                                                                                                                                                                                                                                                                                                                                                                                                                                                                                                                                                                                                                                                                                                                                                   |   |                               |                              |                           |                          |                              |   |            |                              |   |            |                            |   |            |                                    |   |            |                          |   |            |                        |   |            |                         |   |            |                        |    |             |                               |    |             |                      |    |             |                     |    |             |                  |    |             |                     |    |             |                       |    |             |                    |    |             |                       |    |             |                      |    |             |                    |    |             |                       |    |             |                    |    |             |                        |    |             |                 |    |             |                     |    |             |                    |    |             |                  |    |             |                                       |    |             |                  |    |             |                             |    |             |                     |    |             |                     |    |             |                       |    |             |                            |    |             |                            |    |             |                          |
| 18  | balbccx__18                                                             | Enterobacter species                                                                                    |                                                                                                                                                                                                                                                                                                                                                                                                                                                                                                                                                                                                                                                                                                                                                                                                                                                                                                                                                                                                                                                                                                                                                                                                                                                                                                                                                                                                                                                                                                                                                                                                                                                                                                                                                                                                                                                                                                                                                                                                                                                                                                                                                                                                                                                                                                                                                                                                                                                                                                                                                                                                                                                                   |   |                               |                              |                           |                          |                              |   |            |                              |   |            |                            |   |            |                                    |   |            |                          |   |            |                        |   |            |                         |   |            |                        |    |             |                               |    |             |                      |    |             |                     |    |             |                  |    |             |                     |    |             |                       |    |             |                    |    |             |                       |    |             |                      |    |             |                    |    |             |                       |    |             |                    |    |             |                        |    |             |                 |    |             |                     |    |             |                    |    |             |                  |    |             |                                       |    |             |                  |    |             |                             |    |             |                     |    |             |                     |    |             |                       |    |             |                            |    |             |                            |    |             |                          |
| 19  | balbccx__19                                                             | Legionella species                                                                                      |                                                                                                                                                                                                                                                                                                                                                                                                                                                                                                                                                                                                                                                                                                                                                                                                                                                                                                                                                                                                                                                                                                                                                                                                                                                                                                                                                                                                                                                                                                                                                                                                                                                                                                                                                                                                                                                                                                                                                                                                                                                                                                                                                                                                                                                                                                                                                                                                                                                                                                                                                                                                                                                                   |   |                               |                              |                           |                          |                              |   |            |                              |   |            |                            |   |            |                                    |   |            |                          |   |            |                        |   |            |                         |   |            |                        |    |             |                               |    |             |                      |    |             |                     |    |             |                  |    |             |                     |    |             |                       |    |             |                    |    |             |                       |    |             |                      |    |             |                    |    |             |                       |    |             |                    |    |             |                        |    |             |                 |    |             |                     |    |             |                    |    |             |                  |    |             |                                       |    |             |                  |    |             |                             |    |             |                     |    |             |                     |    |             |                       |    |             |                            |    |             |                            |    |             |                          |
| 20  | balbccx__20                                                             | Moraxella catarrhalis                                                                                   |                                                                                                                                                                                                                                                                                                                                                                                                                                                                                                                                                                                                                                                                                                                                                                                                                                                                                                                                                                                                                                                                                                                                                                                                                                                                                                                                                                                                                                                                                                                                                                                                                                                                                                                                                                                                                                                                                                                                                                                                                                                                                                                                                                                                                                                                                                                                                                                                                                                                                                                                                                                                                                                                   |   |                               |                              |                           |                          |                              |   |            |                              |   |            |                            |   |            |                                    |   |            |                          |   |            |                        |   |            |                         |   |            |                        |    |             |                               |    |             |                      |    |             |                     |    |             |                  |    |             |                     |    |             |                       |    |             |                    |    |             |                       |    |             |                      |    |             |                    |    |             |                       |    |             |                    |    |             |                        |    |             |                 |    |             |                     |    |             |                    |    |             |                  |    |             |                                       |    |             |                  |    |             |                             |    |             |                     |    |             |                     |    |             |                       |    |             |                            |    |             |                            |    |             |                          |
| 21  | balbccx__21                                                             | Morganella species                                                                                      |                                                                                                                                                                                                                                                                                                                                                                                                                                                                                                                                                                                                                                                                                                                                                                                                                                                                                                                                                                                                                                                                                                                                                                                                                                                                                                                                                                                                                                                                                                                                                                                                                                                                                                                                                                                                                                                                                                                                                                                                                                                                                                                                                                                                                                                                                                                                                                                                                                                                                                                                                                                                                                                                   |   |                               |                              |                           |                          |                              |   |            |                              |   |            |                            |   |            |                                    |   |            |                          |   |            |                        |   |            |                         |   |            |                        |    |             |                               |    |             |                      |    |             |                     |    |             |                  |    |             |                     |    |             |                       |    |             |                    |    |             |                       |    |             |                      |    |             |                    |    |             |                       |    |             |                    |    |             |                        |    |             |                 |    |             |                     |    |             |                    |    |             |                  |    |             |                                       |    |             |                  |    |             |                             |    |             |                     |    |             |                     |    |             |                       |    |             |                            |    |             |                            |    |             |                          |
| 22  | balbccx__22                                                             | Neisseria meningitides                                                                                  |                                                                                                                                                                                                                                                                                                                                                                                                                                                                                                                                                                                                                                                                                                                                                                                                                                                                                                                                                                                                                                                                                                                                                                                                                                                                                                                                                                                                                                                                                                                                                                                                                                                                                                                                                                                                                                                                                                                                                                                                                                                                                                                                                                                                                                                                                                                                                                                                                                                                                                                                                                                                                                                                   |   |                               |                              |                           |                          |                              |   |            |                              |   |            |                            |   |            |                                    |   |            |                          |   |            |                        |   |            |                         |   |            |                        |    |             |                               |    |             |                      |    |             |                     |    |             |                  |    |             |                     |    |             |                       |    |             |                    |    |             |                       |    |             |                      |    |             |                    |    |             |                       |    |             |                    |    |             |                        |    |             |                 |    |             |                     |    |             |                    |    |             |                  |    |             |                                       |    |             |                  |    |             |                             |    |             |                     |    |             |                     |    |             |                       |    |             |                            |    |             |                            |    |             |                          |
| 23  | balbccx__23                                                             | Proteus species                                                                                         |                                                                                                                                                                                                                                                                                                                                                                                                                                                                                                                                                                                                                                                                                                                                                                                                                                                                                                                                                                                                                                                                                                                                                                                                                                                                                                                                                                                                                                                                                                                                                                                                                                                                                                                                                                                                                                                                                                                                                                                                                                                                                                                                                                                                                                                                                                                                                                                                                                                                                                                                                                                                                                                                   |   |                               |                              |                           |                          |                              |   |            |                              |   |            |                            |   |            |                                    |   |            |                          |   |            |                        |   |            |                         |   |            |                        |    |             |                               |    |             |                      |    |             |                     |    |             |                  |    |             |                     |    |             |                       |    |             |                    |    |             |                       |    |             |                      |    |             |                    |    |             |                       |    |             |                    |    |             |                        |    |             |                 |    |             |                     |    |             |                    |    |             |                  |    |             |                                       |    |             |                  |    |             |                             |    |             |                     |    |             |                     |    |             |                       |    |             |                            |    |             |                            |    |             |                          |
| 24  | balbccx__24                                                             | Citrobacter species                                                                                     |                                                                                                                                                                                                                                                                                                                                                                                                                                                                                                                                                                                                                                                                                                                                                                                                                                                                                                                                                                                                                                                                                                                                                                                                                                                                                                                                                                                                                                                                                                                                                                                                                                                                                                                                                                                                                                                                                                                                                                                                                                                                                                                                                                                                                                                                                                                                                                                                                                                                                                                                                                                                                                                                   |   |                               |                              |                           |                          |                              |   |            |                              |   |            |                            |   |            |                                    |   |            |                          |   |            |                        |   |            |                         |   |            |                        |    |             |                               |    |             |                      |    |             |                     |    |             |                  |    |             |                     |    |             |                       |    |             |                    |    |             |                       |    |             |                      |    |             |                    |    |             |                       |    |             |                    |    |             |                        |    |             |                 |    |             |                     |    |             |                    |    |             |                  |    |             |                                       |    |             |                  |    |             |                             |    |             |                     |    |             |                     |    |             |                       |    |             |                            |    |             |                            |    |             |                          |
| 25  | balbccx__25                                                             | Salmonella species                                                                                      |                                                                                                                                                                                                                                                                                                                                                                                                                                                                                                                                                                                                                                                                                                                                                                                                                                                                                                                                                                                                                                                                                                                                                                                                                                                                                                                                                                                                                                                                                                                                                                                                                                                                                                                                                                                                                                                                                                                                                                                                                                                                                                                                                                                                                                                                                                                                                                                                                                                                                                                                                                                                                                                                   |   |                               |                              |                           |                          |                              |   |            |                              |   |            |                            |   |            |                                    |   |            |                          |   |            |                        |   |            |                         |   |            |                        |    |             |                               |    |             |                      |    |             |                     |    |             |                  |    |             |                     |    |             |                       |    |             |                    |    |             |                       |    |             |                      |    |             |                    |    |             |                       |    |             |                    |    |             |                        |    |             |                 |    |             |                     |    |             |                    |    |             |                  |    |             |                                       |    |             |                  |    |             |                             |    |             |                     |    |             |                     |    |             |                       |    |             |                            |    |             |                            |    |             |                          |
| 26  | balbccx__26                                                             | Serratia species                                                                                        |                                                                                                                                                                                                                                                                                                                                                                                                                                                                                                                                                                                                                                                                                                                                                                                                                                                                                                                                                                                                                                                                                                                                                                                                                                                                                                                                                                                                                                                                                                                                                                                                                                                                                                                                                                                                                                                                                                                                                                                                                                                                                                                                                                                                                                                                                                                                                                                                                                                                                                                                                                                                                                                                   |   |                               |                              |                           |                          |                              |   |            |                              |   |            |                            |   |            |                                    |   |            |                          |   |            |                        |   |            |                         |   |            |                        |    |             |                               |    |             |                      |    |             |                     |    |             |                  |    |             |                     |    |             |                       |    |             |                    |    |             |                       |    |             |                      |    |             |                    |    |             |                       |    |             |                    |    |             |                        |    |             |                 |    |             |                     |    |             |                    |    |             |                  |    |             |                                       |    |             |                  |    |             |                             |    |             |                     |    |             |                     |    |             |                       |    |             |                            |    |             |                            |    |             |                          |
| 27  | balbccx__27                                                             | Sternotrophomonas/Xanthomonas species                                                                   |                                                                                                                                                                                                                                                                                                                                                                                                                                                                                                                                                                                                                                                                                                                                                                                                                                                                                                                                                                                                                                                                                                                                                                                                                                                                                                                                                                                                                                                                                                                                                                                                                                                                                                                                                                                                                                                                                                                                                                                                                                                                                                                                                                                                                                                                                                                                                                                                                                                                                                                                                                                                                                                                   |   |                               |                              |                           |                          |                              |   |            |                              |   |            |                            |   |            |                                    |   |            |                          |   |            |                        |   |            |                         |   |            |                        |    |             |                               |    |             |                      |    |             |                     |    |             |                  |    |             |                     |    |             |                       |    |             |                    |    |             |                       |    |             |                      |    |             |                    |    |             |                       |    |             |                    |    |             |                        |    |             |                 |    |             |                     |    |             |                    |    |             |                  |    |             |                                       |    |             |                  |    |             |                             |    |             |                     |    |             |                     |    |             |                       |    |             |                            |    |             |                            |    |             |                          |
| 28  | balbccx__28                                                             | Yersinia species                                                                                        |                                                                                                                                                                                                                                                                                                                                                                                                                                                                                                                                                                                                                                                                                                                                                                                                                                                                                                                                                                                                                                                                                                                                                                                                                                                                                                                                                                                                                                                                                                                                                                                                                                                                                                                                                                                                                                                                                                                                                                                                                                                                                                                                                                                                                                                                                                                                                                                                                                                                                                                                                                                                                                                                   |   |                               |                              |                           |                          |                              |   |            |                              |   |            |                            |   |            |                                    |   |            |                          |   |            |                        |   |            |                         |   |            |                        |    |             |                               |    |             |                      |    |             |                     |    |             |                  |    |             |                     |    |             |                       |    |             |                    |    |             |                       |    |             |                      |    |             |                    |    |             |                       |    |             |                    |    |             |                        |    |             |                 |    |             |                     |    |             |                    |    |             |                  |    |             |                                       |    |             |                  |    |             |                             |    |             |                     |    |             |                     |    |             |                       |    |             |                            |    |             |                            |    |             |                          |
| 29  | balbccx__29                                                             | Other Gram negative species                                                                             |                                                                                                                                                                                                                                                                                                                                                                                                                                                                                                                                                                                                                                                                                                                                                                                                                                                                                                                                                                                                                                                                                                                                                                                                                                                                                                                                                                                                                                                                                                                                                                                                                                                                                                                                                                                                                                                                                                                                                                                                                                                                                                                                                                                                                                                                                                                                                                                                                                                                                                                                                                                                                                                                   |   |                               |                              |                           |                          |                              |   |            |                              |   |            |                            |   |            |                                    |   |            |                          |   |            |                        |   |            |                         |   |            |                        |    |             |                               |    |             |                      |    |             |                     |    |             |                  |    |             |                     |    |             |                       |    |             |                    |    |             |                       |    |             |                      |    |             |                    |    |             |                       |    |             |                    |    |             |                        |    |             |                 |    |             |                     |    |             |                    |    |             |                  |    |             |                                       |    |             |                  |    |             |                             |    |             |                     |    |             |                     |    |             |                       |    |             |                            |    |             |                            |    |             |                          |
| 30  | balbccx__30                                                             | Actinomyces species                                                                                     |                                                                                                                                                                                                                                                                                                                                                                                                                                                                                                                                                                                                                                                                                                                                                                                                                                                                                                                                                                                                                                                                                                                                                                                                                                                                                                                                                                                                                                                                                                                                                                                                                                                                                                                                                                                                                                                                                                                                                                                                                                                                                                                                                                                                                                                                                                                                                                                                                                                                                                                                                                                                                                                                   |   |                               |                              |                           |                          |                              |   |            |                              |   |            |                            |   |            |                                    |   |            |                          |   |            |                        |   |            |                         |   |            |                        |    |             |                               |    |             |                      |    |             |                     |    |             |                  |    |             |                     |    |             |                       |    |             |                    |    |             |                       |    |             |                      |    |             |                    |    |             |                       |    |             |                    |    |             |                        |    |             |                 |    |             |                     |    |             |                    |    |             |                  |    |             |                                       |    |             |                  |    |             |                             |    |             |                     |    |             |                     |    |             |                       |    |             |                            |    |             |                            |    |             |                          |
| 31  | balbccx__31                                                             | Bacteriodes species                                                                                     |                                                                                                                                                                                                                                                                                                                                                                                                                                                                                                                                                                                                                                                                                                                                                                                                                                                                                                                                                                                                                                                                                                                                                                                                                                                                                                                                                                                                                                                                                                                                                                                                                                                                                                                                                                                                                                                                                                                                                                                                                                                                                                                                                                                                                                                                                                                                                                                                                                                                                                                                                                                                                                                                   |   |                               |                              |                           |                          |                              |   |            |                              |   |            |                            |   |            |                                    |   |            |                          |   |            |                        |   |            |                         |   |            |                        |    |             |                               |    |             |                      |    |             |                     |    |             |                  |    |             |                     |    |             |                       |    |             |                    |    |             |                       |    |             |                      |    |             |                    |    |             |                       |    |             |                    |    |             |                        |    |             |                 |    |             |                     |    |             |                    |    |             |                  |    |             |                                       |    |             |                  |    |             |                             |    |             |                     |    |             |                     |    |             |                       |    |             |                            |    |             |                            |    |             |                          |
| 32  | balbccx__32                                                             | Clostridium difficile                                                                                   |                                                                                                                                                                                                                                                                                                                                                                                                                                                                                                                                                                                                                                                                                                                                                                                                                                                                                                                                                                                                                                                                                                                                                                                                                                                                                                                                                                                                                                                                                                                                                                                                                                                                                                                                                                                                                                                                                                                                                                                                                                                                                                                                                                                                                                                                                                                                                                                                                                                                                                                                                                                                                                                                   |   |                               |                              |                           |                          |                              |   |            |                              |   |            |                            |   |            |                                    |   |            |                          |   |            |                        |   |            |                         |   |            |                        |    |             |                               |    |             |                      |    |             |                     |    |             |                  |    |             |                     |    |             |                       |    |             |                    |    |             |                       |    |             |                      |    |             |                    |    |             |                       |    |             |                    |    |             |                        |    |             |                 |    |             |                     |    |             |                    |    |             |                  |    |             |                                       |    |             |                  |    |             |                             |    |             |                     |    |             |                     |    |             |                       |    |             |                            |    |             |                            |    |             |                          |
| 33  | balbccx__33                                                             | Clostridium, other species                                                                              |                                                                                                                                                                                                                                                                                                                                                                                                                                                                                                                                                                                                                                                                                                                                                                                                                                                                                                                                                                                                                                                                                                                                                                                                                                                                                                                                                                                                                                                                                                                                                                                                                                                                                                                                                                                                                                                                                                                                                                                                                                                                                                                                                                                                                                                                                                                                                                                                                                                                                                                                                                                                                                                                   |   |                               |                              |                           |                          |                              |   |            |                              |   |            |                            |   |            |                                    |   |            |                          |   |            |                        |   |            |                         |   |            |                        |    |             |                               |    |             |                      |    |             |                     |    |             |                  |    |             |                     |    |             |                       |    |             |                    |    |             |                       |    |             |                      |    |             |                    |    |             |                       |    |             |                    |    |             |                        |    |             |                 |    |             |                     |    |             |                    |    |             |                  |    |             |                                       |    |             |                  |    |             |                             |    |             |                     |    |             |                     |    |             |                       |    |             |                            |    |             |                            |    |             |                          |
| 34  | balbccx__34                                                             | Peptostreptococcus species                                                                              |                                                                                                                                                                                                                                                                                                                                                                                                                                                                                                                                                                                                                                                                                                                                                                                                                                                                                                                                                                                                                                                                                                                                                                                                                                                                                                                                                                                                                                                                                                                                                                                                                                                                                                                                                                                                                                                                                                                                                                                                                                                                                                                                                                                                                                                                                                                                                                                                                                                                                                                                                                                                                                                                   |   |                               |                              |                           |                          |                              |   |            |                              |   |            |                            |   |            |                                    |   |            |                          |   |            |                        |   |            |                         |   |            |                        |    |             |                               |    |             |                      |    |             |                     |    |             |                  |    |             |                     |    |             |                       |    |             |                    |    |             |                       |    |             |                      |    |             |                    |    |             |                       |    |             |                    |    |             |                        |    |             |                 |    |             |                     |    |             |                    |    |             |                  |    |             |                                       |    |             |                  |    |             |                             |    |             |                     |    |             |                     |    |             |                       |    |             |                            |    |             |                            |    |             |                          |
| 35  | balbccx__35                                                             | Other anaerobic bacteria                                                                                |                                                                                                                                                                                                                                                                                                                                                                                                                                                                                                                                                                                                                                                                                                                                                                                                                                                                                                                                                                                                                                                                                                                                                                                                                                                                                                                                                                                                                                                                                                                                                                                                                                                                                                                                                                                                                                                                                                                                                                                                                                                                                                                                                                                                                                                                                                                                                                                                                                                                                                                                                                                                                                                                   |   |                               |                              |                           |                          |                              |   |            |                              |   |            |                            |   |            |                                    |   |            |                          |   |            |                        |   |            |                         |   |            |                        |    |             |                               |    |             |                      |    |             |                     |    |             |                  |    |             |                     |    |             |                       |    |             |                    |    |             |                       |    |             |                      |    |             |                    |    |             |                       |    |             |                    |    |             |                        |    |             |                 |    |             |                     |    |             |                    |    |             |                  |    |             |                                       |    |             |                  |    |             |                             |    |             |                     |    |             |                     |    |             |                       |    |             |                            |    |             |                            |    |             |                          |
| 930 | balatypnayn                                                             | BAL Atypical PNA Panel Sent?                                                                            | radio<br><table border="1"> <tr><td>1</td><td>Yes, with positive results...</td></tr> <tr><td>2</td><td>Yes, all negative results</td></tr> <tr><td>3</td><td>No</td></tr> </table>                                                                                                                                                                                                                                                                                                                                                                                                                                                                                                                                                                                                                                                                                                                                                                                                                                                                                                                                                                                                                                                                                                                                                                                                                                                                                                                                                                                                                                                                                                                                                                                                                                                                                                                                                                                                                                                                                                                                                                                                                                                                                                                                                                                                                                                                                                                                                                                                                                                                               | 1 | Yes, with positive results... | 2                            | Yes, all negative results | 3                        | No                           |   |            |                              |   |            |                            |   |            |                                    |   |            |                          |   |            |                        |   |            |                         |   |            |                        |    |             |                               |    |             |                      |    |             |                     |    |             |                  |    |             |                     |    |             |                       |    |             |                    |    |             |                       |    |             |                      |    |             |                    |    |             |                       |    |             |                    |    |             |                        |    |             |                 |    |             |                     |    |             |                    |    |             |                  |    |             |                                       |    |             |                  |    |             |                             |    |             |                     |    |             |                     |    |             |                       |    |             |                            |    |             |                            |    |             |                          |
| 1   | Yes, with positive results...                                           |                                                                                                         |                                                                                                                                                                                                                                                                                                                                                                                                                                                                                                                                                                                                                                                                                                                                                                                                                                                                                                                                                                                                                                                                                                                                                                                                                                                                                                                                                                                                                                                                                                                                                                                                                                                                                                                                                                                                                                                                                                                                                                                                                                                                                                                                                                                                                                                                                                                                                                                                                                                                                                                                                                                                                                                                   |   |                               |                              |                           |                          |                              |   |            |                              |   |            |                            |   |            |                                    |   |            |                          |   |            |                        |   |            |                         |   |            |                        |    |             |                               |    |             |                      |    |             |                     |    |             |                  |    |             |                     |    |             |                       |    |             |                    |    |             |                       |    |             |                      |    |             |                    |    |             |                       |    |             |                    |    |             |                        |    |             |                 |    |             |                     |    |             |                    |    |             |                  |    |             |                                       |    |             |                  |    |             |                             |    |             |                     |    |             |                     |    |             |                       |    |             |                            |    |             |                            |    |             |                          |
| 2   | Yes, all negative results                                               |                                                                                                         |                                                                                                                                                                                                                                                                                                                                                                                                                                                                                                                                                                                                                                                                                                                                                                                                                                                                                                                                                                                                                                                                                                                                                                                                                                                                                                                                                                                                                                                                                                                                                                                                                                                                                                                                                                                                                                                                                                                                                                                                                                                                                                                                                                                                                                                                                                                                                                                                                                                                                                                                                                                                                                                                   |   |                               |                              |                           |                          |                              |   |            |                              |   |            |                            |   |            |                                    |   |            |                          |   |            |                        |   |            |                         |   |            |                        |    |             |                               |    |             |                      |    |             |                     |    |             |                  |    |             |                     |    |             |                       |    |             |                    |    |             |                       |    |             |                      |    |             |                    |    |             |                       |    |             |                    |    |             |                        |    |             |                 |    |             |                     |    |             |                    |    |             |                  |    |             |                                       |    |             |                  |    |             |                             |    |             |                     |    |             |                     |    |             |                       |    |             |                            |    |             |                            |    |             |                          |
| 3   | No                                                                      |                                                                                                         |                                                                                                                                                                                                                                                                                                                                                                                                                                                                                                                                                                                                                                                                                                                                                                                                                                                                                                                                                                                                                                                                                                                                                                                                                                                                                                                                                                                                                                                                                                                                                                                                                                                                                                                                                                                                                                                                                                                                                                                                                                                                                                                                                                                                                                                                                                                                                                                                                                                                                                                                                                                                                                                                   |   |                               |                              |                           |                          |                              |   |            |                              |   |            |                            |   |            |                                    |   |            |                          |   |            |                        |   |            |                         |   |            |                        |    |             |                               |    |             |                      |    |             |                     |    |             |                  |    |             |                     |    |             |                       |    |             |                    |    |             |                       |    |             |                      |    |             |                    |    |             |                       |    |             |                    |    |             |                        |    |             |                 |    |             |                     |    |             |                    |    |             |                  |    |             |                                       |    |             |                  |    |             |                             |    |             |                     |    |             |                     |    |             |                       |    |             |                            |    |             |                            |    |             |                          |
| 931 | balatypicalpnaresults<br>Show the field ONLY if:<br>[balatypnayn] = '1' | BAL Atypical PNA Panel Results                                                                          | checkbox<br><table border="1"> <tr><td>1</td><td>balatypicalpnaresults__1</td><td>CHLAMYDOPHILA PNEUMONIAE</td></tr> <tr><td>2</td><td>balatypicalpnaresults__2</td><td>MYCOPLASMA PNEUMONIAE</td></tr> </table>                                                                                                                                                                                                                                                                                                                                                                                                                                                                                                                                                                                                                                                                                                                                                                                                                                                                                                                                                                                                                                                                                                                                                                                                                                                                                                                                                                                                                                                                                                                                                                                                                                                                                                                                                                                                                                                                                                                                                                                                                                                                                                                                                                                                                                                                                                                                                                                                                                                  | 1 | balatypicalpnaresults__1      | CHLAMYDOPHILA PNEUMONIAE     | 2                         | balatypicalpnaresults__2 | MYCOPLASMA PNEUMONIAE        |   |            |                              |   |            |                            |   |            |                                    |   |            |                          |   |            |                        |   |            |                         |   |            |                        |    |             |                               |    |             |                      |    |             |                     |    |             |                  |    |             |                     |    |             |                       |    |             |                    |    |             |                       |    |             |                      |    |             |                    |    |             |                       |    |             |                    |    |             |                        |    |             |                 |    |             |                     |    |             |                    |    |             |                  |    |             |                                       |    |             |                  |    |             |                             |    |             |                     |    |             |                     |    |             |                       |    |             |                            |    |             |                            |    |             |                          |
| 1   | balatypicalpnaresults__1                                                | CHLAMYDOPHILA PNEUMONIAE                                                                                |                                                                                                                                                                                                                                                                                                                                                                                                                                                                                                                                                                                                                                                                                                                                                                                                                                                                                                                                                                                                                                                                                                                                                                                                                                                                                                                                                                                                                                                                                                                                                                                                                                                                                                                                                                                                                                                                                                                                                                                                                                                                                                                                                                                                                                                                                                                                                                                                                                                                                                                                                                                                                                                                   |   |                               |                              |                           |                          |                              |   |            |                              |   |            |                            |   |            |                                    |   |            |                          |   |            |                        |   |            |                         |   |            |                        |    |             |                               |    |             |                      |    |             |                     |    |             |                  |    |             |                     |    |             |                       |    |             |                    |    |             |                       |    |             |                      |    |             |                    |    |             |                       |    |             |                    |    |             |                        |    |             |                 |    |             |                     |    |             |                    |    |             |                  |    |             |                                       |    |             |                  |    |             |                             |    |             |                     |    |             |                     |    |             |                       |    |             |                            |    |             |                            |    |             |                          |
| 2   | balatypicalpnaresults__2                                                | MYCOPLASMA PNEUMONIAE                                                                                   |                                                                                                                                                                                                                                                                                                                                                                                                                                                                                                                                                                                                                                                                                                                                                                                                                                                                                                                                                                                                                                                                                                                                                                                                                                                                                                                                                                                                                                                                                                                                                                                                                                                                                                                                                                                                                                                                                                                                                                                                                                                                                                                                                                                                                                                                                                                                                                                                                                                                                                                                                                                                                                                                   |   |                               |                              |                           |                          |                              |   |            |                              |   |            |                            |   |            |                                    |   |            |                          |   |            |                        |   |            |                         |   |            |                        |    |             |                               |    |             |                      |    |             |                     |    |             |                  |    |             |                     |    |             |                       |    |             |                    |    |             |                       |    |             |                      |    |             |                    |    |             |                       |    |             |                    |    |             |                        |    |             |                 |    |             |                     |    |             |                    |    |             |                  |    |             |                                       |    |             |                  |    |             |                             |    |             |                     |    |             |                     |    |             |                       |    |             |                            |    |             |                            |    |             |                          |
| 932 | ballegionellacx                                                         | Legionella Culture Sent?                                                                                | radio<br><table border="1"> <tr><td>1</td><td>Yes. Positive growth</td></tr> <tr><td>2</td><td>Yes. Negative growth</td></tr> <tr><td>3</td><td>No.</td></tr> </table>                                                                                                                                                                                                                                                                                                                                                                                                                                                                                                                                                                                                                                                                                                                                                                                                                                                                                                                                                                                                                                                                                                                                                                                                                                                                                                                                                                                                                                                                                                                                                                                                                                                                                                                                                                                                                                                                                                                                                                                                                                                                                                                                                                                                                                                                                                                                                                                                                                                                                            | 1 | Yes. Positive growth          | 2                            | Yes. Negative growth      | 3                        | No.                          |   |            |                              |   |            |                            |   |            |                                    |   |            |                          |   |            |                        |   |            |                         |   |            |                        |    |             |                               |    |             |                      |    |             |                     |    |             |                  |    |             |                     |    |             |                       |    |             |                    |    |             |                       |    |             |                      |    |             |                    |    |             |                       |    |             |                    |    |             |                        |    |             |                 |    |             |                     |    |             |                    |    |             |                  |    |             |                                       |    |             |                  |    |             |                             |    |             |                     |    |             |                     |    |             |                       |    |             |                            |    |             |                            |    |             |                          |
| 1   | Yes. Positive growth                                                    |                                                                                                         |                                                                                                                                                                                                                                                                                                                                                                                                                                                                                                                                                                                                                                                                                                                                                                                                                                                                                                                                                                                                                                                                                                                                                                                                                                                                                                                                                                                                                                                                                                                                                                                                                                                                                                                                                                                                                                                                                                                                                                                                                                                                                                                                                                                                                                                                                                                                                                                                                                                                                                                                                                                                                                                                   |   |                               |                              |                           |                          |                              |   |            |                              |   |            |                            |   |            |                                    |   |            |                          |   |            |                        |   |            |                         |   |            |                        |    |             |                               |    |             |                      |    |             |                     |    |             |                  |    |             |                     |    |             |                       |    |             |                    |    |             |                       |    |             |                      |    |             |                    |    |             |                       |    |             |                    |    |             |                        |    |             |                 |    |             |                     |    |             |                    |    |             |                  |    |             |                                       |    |             |                  |    |             |                             |    |             |                     |    |             |                     |    |             |                       |    |             |                            |    |             |                            |    |             |                          |
| 2   | Yes. Negative growth                                                    |                                                                                                         |                                                                                                                                                                                                                                                                                                                                                                                                                                                                                                                                                                                                                                                                                                                                                                                                                                                                                                                                                                                                                                                                                                                                                                                                                                                                                                                                                                                                                                                                                                                                                                                                                                                                                                                                                                                                                                                                                                                                                                                                                                                                                                                                                                                                                                                                                                                                                                                                                                                                                                                                                                                                                                                                   |   |                               |                              |                           |                          |                              |   |            |                              |   |            |                            |   |            |                                    |   |            |                          |   |            |                        |   |            |                         |   |            |                        |    |             |                               |    |             |                      |    |             |                     |    |             |                  |    |             |                     |    |             |                       |    |             |                    |    |             |                       |    |             |                      |    |             |                    |    |             |                       |    |             |                    |    |             |                        |    |             |                 |    |             |                     |    |             |                    |    |             |                  |    |             |                                       |    |             |                  |    |             |                             |    |             |                     |    |             |                     |    |             |                       |    |             |                            |    |             |                            |    |             |                          |
| 3   | No.                                                                     |                                                                                                         |                                                                                                                                                                                                                                                                                                                                                                                                                                                                                                                                                                                                                                                                                                                                                                                                                                                                                                                                                                                                                                                                                                                                                                                                                                                                                                                                                                                                                                                                                                                                                                                                                                                                                                                                                                                                                                                                                                                                                                                                                                                                                                                                                                                                                                                                                                                                                                                                                                                                                                                                                                                                                                                                   |   |                               |                              |                           |                          |                              |   |            |                              |   |            |                            |   |            |                                    |   |            |                          |   |            |                        |   |            |                         |   |            |                        |    |             |                               |    |             |                      |    |             |                     |    |             |                  |    |             |                     |    |             |                       |    |             |                    |    |             |                       |    |             |                      |    |             |                    |    |             |                       |    |             |                    |    |             |                        |    |             |                 |    |             |                     |    |             |                    |    |             |                  |    |             |                                       |    |             |                  |    |             |                             |    |             |                     |    |             |                     |    |             |                       |    |             |                            |    |             |                            |    |             |                          |
| 933 | ballegionelladfa                                                        | Legionella DFA Sent?                                                                                    | radio<br><table border="1"> <tr><td>1</td><td>Yes. Positive</td></tr> <tr><td>2</td><td>Yes. Negative</td></tr> <tr><td>3</td><td>No.</td></tr> </table>                                                                                                                                                                                                                                                                                                                                                                                                                                                                                                                                                                                                                                                                                                                                                                                                                                                                                                                                                                                                                                                                                                                                                                                                                                                                                                                                                                                                                                                                                                                                                                                                                                                                                                                                                                                                                                                                                                                                                                                                                                                                                                                                                                                                                                                                                                                                                                                                                                                                                                          | 1 | Yes. Positive                 | 2                            | Yes. Negative             | 3                        | No.                          |   |            |                              |   |            |                            |   |            |                                    |   |            |                          |   |            |                        |   |            |                         |   |            |                        |    |             |                               |    |             |                      |    |             |                     |    |             |                  |    |             |                     |    |             |                       |    |             |                    |    |             |                       |    |             |                      |    |             |                    |    |             |                       |    |             |                    |    |             |                        |    |             |                 |    |             |                     |    |             |                    |    |             |                  |    |             |                                       |    |             |                  |    |             |                             |    |             |                     |    |             |                     |    |             |                       |    |             |                            |    |             |                            |    |             |                          |
| 1   | Yes. Positive                                                           |                                                                                                         |                                                                                                                                                                                                                                                                                                                                                                                                                                                                                                                                                                                                                                                                                                                                                                                                                                                                                                                                                                                                                                                                                                                                                                                                                                                                                                                                                                                                                                                                                                                                                                                                                                                                                                                                                                                                                                                                                                                                                                                                                                                                                                                                                                                                                                                                                                                                                                                                                                                                                                                                                                                                                                                                   |   |                               |                              |                           |                          |                              |   |            |                              |   |            |                            |   |            |                                    |   |            |                          |   |            |                        |   |            |                         |   |            |                        |    |             |                               |    |             |                      |    |             |                     |    |             |                  |    |             |                     |    |             |                       |    |             |                    |    |             |                       |    |             |                      |    |             |                    |    |             |                       |    |             |                    |    |             |                        |    |             |                 |    |             |                     |    |             |                    |    |             |                  |    |             |                                       |    |             |                  |    |             |                             |    |             |                     |    |             |                     |    |             |                       |    |             |                            |    |             |                            |    |             |                          |
| 2   | Yes. Negative                                                           |                                                                                                         |                                                                                                                                                                                                                                                                                                                                                                                                                                                                                                                                                                                                                                                                                                                                                                                                                                                                                                                                                                                                                                                                                                                                                                                                                                                                                                                                                                                                                                                                                                                                                                                                                                                                                                                                                                                                                                                                                                                                                                                                                                                                                                                                                                                                                                                                                                                                                                                                                                                                                                                                                                                                                                                                   |   |                               |                              |                           |                          |                              |   |            |                              |   |            |                            |   |            |                                    |   |            |                          |   |            |                        |   |            |                         |   |            |                        |    |             |                               |    |             |                      |    |             |                     |    |             |                  |    |             |                     |    |             |                       |    |             |                    |    |             |                       |    |             |                      |    |             |                    |    |             |                       |    |             |                    |    |             |                        |    |             |                 |    |             |                     |    |             |                    |    |             |                  |    |             |                                       |    |             |                  |    |             |                             |    |             |                     |    |             |                     |    |             |                       |    |             |                            |    |             |                            |    |             |                          |
| 3   | No.                                                                     |                                                                                                         |                                                                                                                                                                                                                                                                                                                                                                                                                                                                                                                                                                                                                                                                                                                                                                                                                                                                                                                                                                                                                                                                                                                                                                                                                                                                                                                                                                                                                                                                                                                                                                                                                                                                                                                                                                                                                                                                                                                                                                                                                                                                                                                                                                                                                                                                                                                                                                                                                                                                                                                                                                                                                                                                   |   |                               |                              |                           |                          |                              |   |            |                              |   |            |                            |   |            |                                    |   |            |                          |   |            |                        |   |            |                         |   |            |                        |    |             |                               |    |             |                      |    |             |                     |    |             |                  |    |             |                     |    |             |                       |    |             |                    |    |             |                       |    |             |                      |    |             |                    |    |             |                       |    |             |                    |    |             |                        |    |             |                 |    |             |                     |    |             |                    |    |             |                  |    |             |                                       |    |             |                  |    |             |                             |    |             |                     |    |             |                     |    |             |                       |    |             |                            |    |             |                            |    |             |                          |

|                    |                                                                       |                                      |                                                                                                                                                                                                                                                                                                                                                                                                                                                                                                                                                                                                                                                                                                                                                                                                                                                                                                                                                                                                                                                                                                                |                    |  |   |                               |            |                             |                     |               |   |                     |             |   |                     |                       |   |                     |                       |                 |                                   |                       |   |                     |             |   |                     |    |   |                     |         |   |                     |    |    |                      |    |    |                      |    |    |                      |    |    |                      |    |    |                      |    |    |                      |   |
|--------------------|-----------------------------------------------------------------------|--------------------------------------|----------------------------------------------------------------------------------------------------------------------------------------------------------------------------------------------------------------------------------------------------------------------------------------------------------------------------------------------------------------------------------------------------------------------------------------------------------------------------------------------------------------------------------------------------------------------------------------------------------------------------------------------------------------------------------------------------------------------------------------------------------------------------------------------------------------------------------------------------------------------------------------------------------------------------------------------------------------------------------------------------------------------------------------------------------------------------------------------------------------|--------------------|--|---|-------------------------------|------------|-----------------------------|---------------------|---------------|---|---------------------|-------------|---|---------------------|-----------------------|---|---------------------|-----------------------|-----------------|-----------------------------------|-----------------------|---|---------------------|-------------|---|---------------------|----|---|---------------------|---------|---|---------------------|----|----|----------------------|----|----|----------------------|----|----|----------------------|----|----|----------------------|----|----|----------------------|----|----|----------------------|---|
| 934                | balresvirpanyn                                                        | BAL Resp Viral Panel Sent?           | <table border="1"> <tr><td colspan="2">radio</td></tr> <tr><td>1</td><td>Yes, with positive results...</td></tr> <tr><td>2</td><td>Yes, all negative results</td></tr> <tr><td>3</td><td>No</td></tr> </table>                                                                                                                                                                                                                                                                                                                                                                                                                                                                                                                                                                                                                                                                                                                                                                                                                                                                                                 | radio              |  | 1 | Yes, with positive results... | 2          | Yes, all negative results   | 3                   | No            |   |                     |             |   |                     |                       |   |                     |                       |                 |                                   |                       |   |                     |             |   |                     |    |   |                     |         |   |                     |    |    |                      |    |    |                      |    |    |                      |    |    |                      |    |    |                      |    |    |                      |   |
| radio              |                                                                       |                                      |                                                                                                                                                                                                                                                                                                                                                                                                                                                                                                                                                                                                                                                                                                                                                                                                                                                                                                                                                                                                                                                                                                                |                    |  |   |                               |            |                             |                     |               |   |                     |             |   |                     |                       |   |                     |                       |                 |                                   |                       |   |                     |             |   |                     |    |   |                     |         |   |                     |    |    |                      |    |    |                      |    |    |                      |    |    |                      |    |    |                      |    |    |                      |   |
| 1                  | Yes, with positive results...                                         |                                      |                                                                                                                                                                                                                                                                                                                                                                                                                                                                                                                                                                                                                                                                                                                                                                                                                                                                                                                                                                                                                                                                                                                |                    |  |   |                               |            |                             |                     |               |   |                     |             |   |                     |                       |   |                     |                       |                 |                                   |                       |   |                     |             |   |                     |    |   |                     |         |   |                     |    |    |                      |    |    |                      |    |    |                      |    |    |                      |    |    |                      |    |    |                      |   |
| 2                  | Yes, all negative results                                             |                                      |                                                                                                                                                                                                                                                                                                                                                                                                                                                                                                                                                                                                                                                                                                                                                                                                                                                                                                                                                                                                                                                                                                                |                    |  |   |                               |            |                             |                     |               |   |                     |             |   |                     |                       |   |                     |                       |                 |                                   |                       |   |                     |             |   |                     |    |   |                     |         |   |                     |    |    |                      |    |    |                      |    |    |                      |    |    |                      |    |    |                      |    |    |                      |   |
| 3                  | No                                                                    |                                      |                                                                                                                                                                                                                                                                                                                                                                                                                                                                                                                                                                                                                                                                                                                                                                                                                                                                                                                                                                                                                                                                                                                |                    |  |   |                               |            |                             |                     |               |   |                     |             |   |                     |                       |   |                     |                       |                 |                                   |                       |   |                     |             |   |                     |    |   |                     |         |   |                     |    |    |                      |    |    |                      |    |    |                      |    |    |                      |    |    |                      |    |    |                      |   |
| 935                | balresvirresults<br>Show the field ONLY if:<br>[balresvirpanyn] = '1' | BAL Resp Virus Panel Results         | <table border="1"> <tr><td colspan="2">checkbox, Required</td></tr> <tr><td>1</td><td>balresvirresults__1</td><td>A</td></tr> <tr><td>2</td><td>balresvirresults__2</td><td>C</td></tr> <tr><td>3</td><td>balresvirresults__3</td><td>C</td></tr> <tr><td>4</td><td>balresvirresults__4</td><td>C</td></tr> <tr><td>5</td><td>balresvirresults__5</td><td>C</td></tr> <tr><td>METAPNEUMOVIRUS</td><td>balresvirresults__metapneumovirus</td><td>P</td></tr> <tr><td>6</td><td>balresvirresults__6</td><td>H<br/>R<br/>R</td></tr> <tr><td>7</td><td>balresvirresults__7</td><td>II</td></tr> <tr><td>8</td><td>balresvirresults__8</td><td>II<br/>R</td></tr> <tr><td>9</td><td>balresvirresults__9</td><td>II</td></tr> <tr><td>10</td><td>balresvirresults__10</td><td>Ir</td></tr> <tr><td>11</td><td>balresvirresults__11</td><td>P.</td></tr> <tr><td>12</td><td>balresvirresults__12</td><td>P.</td></tr> <tr><td>13</td><td>balresvirresults__13</td><td>P.</td></tr> <tr><td>14</td><td>balresvirresults__14</td><td>P.</td></tr> <tr><td>15</td><td>balresvirresults__15</td><td>R</td></tr> </table> | checkbox, Required |  | 1 | balresvirresults__1           | A          | 2                           | balresvirresults__2 | C             | 3 | balresvirresults__3 | C           | 4 | balresvirresults__4 | C                     | 5 | balresvirresults__5 | C                     | METAPNEUMOVIRUS | balresvirresults__metapneumovirus | P                     | 6 | balresvirresults__6 | H<br>R<br>R | 7 | balresvirresults__7 | II | 8 | balresvirresults__8 | II<br>R | 9 | balresvirresults__9 | II | 10 | balresvirresults__10 | Ir | 11 | balresvirresults__11 | P. | 12 | balresvirresults__12 | P. | 13 | balresvirresults__13 | P. | 14 | balresvirresults__14 | P. | 15 | balresvirresults__15 | R |
| checkbox, Required |                                                                       |                                      |                                                                                                                                                                                                                                                                                                                                                                                                                                                                                                                                                                                                                                                                                                                                                                                                                                                                                                                                                                                                                                                                                                                |                    |  |   |                               |            |                             |                     |               |   |                     |             |   |                     |                       |   |                     |                       |                 |                                   |                       |   |                     |             |   |                     |    |   |                     |         |   |                     |    |    |                      |    |    |                      |    |    |                      |    |    |                      |    |    |                      |    |    |                      |   |
| 1                  | balresvirresults__1                                                   | A                                    |                                                                                                                                                                                                                                                                                                                                                                                                                                                                                                                                                                                                                                                                                                                                                                                                                                                                                                                                                                                                                                                                                                                |                    |  |   |                               |            |                             |                     |               |   |                     |             |   |                     |                       |   |                     |                       |                 |                                   |                       |   |                     |             |   |                     |    |   |                     |         |   |                     |    |    |                      |    |    |                      |    |    |                      |    |    |                      |    |    |                      |    |    |                      |   |
| 2                  | balresvirresults__2                                                   | C                                    |                                                                                                                                                                                                                                                                                                                                                                                                                                                                                                                                                                                                                                                                                                                                                                                                                                                                                                                                                                                                                                                                                                                |                    |  |   |                               |            |                             |                     |               |   |                     |             |   |                     |                       |   |                     |                       |                 |                                   |                       |   |                     |             |   |                     |    |   |                     |         |   |                     |    |    |                      |    |    |                      |    |    |                      |    |    |                      |    |    |                      |    |    |                      |   |
| 3                  | balresvirresults__3                                                   | C                                    |                                                                                                                                                                                                                                                                                                                                                                                                                                                                                                                                                                                                                                                                                                                                                                                                                                                                                                                                                                                                                                                                                                                |                    |  |   |                               |            |                             |                     |               |   |                     |             |   |                     |                       |   |                     |                       |                 |                                   |                       |   |                     |             |   |                     |    |   |                     |         |   |                     |    |    |                      |    |    |                      |    |    |                      |    |    |                      |    |    |                      |    |    |                      |   |
| 4                  | balresvirresults__4                                                   | C                                    |                                                                                                                                                                                                                                                                                                                                                                                                                                                                                                                                                                                                                                                                                                                                                                                                                                                                                                                                                                                                                                                                                                                |                    |  |   |                               |            |                             |                     |               |   |                     |             |   |                     |                       |   |                     |                       |                 |                                   |                       |   |                     |             |   |                     |    |   |                     |         |   |                     |    |    |                      |    |    |                      |    |    |                      |    |    |                      |    |    |                      |    |    |                      |   |
| 5                  | balresvirresults__5                                                   | C                                    |                                                                                                                                                                                                                                                                                                                                                                                                                                                                                                                                                                                                                                                                                                                                                                                                                                                                                                                                                                                                                                                                                                                |                    |  |   |                               |            |                             |                     |               |   |                     |             |   |                     |                       |   |                     |                       |                 |                                   |                       |   |                     |             |   |                     |    |   |                     |         |   |                     |    |    |                      |    |    |                      |    |    |                      |    |    |                      |    |    |                      |    |    |                      |   |
| METAPNEUMOVIRUS    | balresvirresults__metapneumovirus                                     | P                                    |                                                                                                                                                                                                                                                                                                                                                                                                                                                                                                                                                                                                                                                                                                                                                                                                                                                                                                                                                                                                                                                                                                                |                    |  |   |                               |            |                             |                     |               |   |                     |             |   |                     |                       |   |                     |                       |                 |                                   |                       |   |                     |             |   |                     |    |   |                     |         |   |                     |    |    |                      |    |    |                      |    |    |                      |    |    |                      |    |    |                      |    |    |                      |   |
| 6                  | balresvirresults__6                                                   | H<br>R<br>R                          |                                                                                                                                                                                                                                                                                                                                                                                                                                                                                                                                                                                                                                                                                                                                                                                                                                                                                                                                                                                                                                                                                                                |                    |  |   |                               |            |                             |                     |               |   |                     |             |   |                     |                       |   |                     |                       |                 |                                   |                       |   |                     |             |   |                     |    |   |                     |         |   |                     |    |    |                      |    |    |                      |    |    |                      |    |    |                      |    |    |                      |    |    |                      |   |
| 7                  | balresvirresults__7                                                   | II                                   |                                                                                                                                                                                                                                                                                                                                                                                                                                                                                                                                                                                                                                                                                                                                                                                                                                                                                                                                                                                                                                                                                                                |                    |  |   |                               |            |                             |                     |               |   |                     |             |   |                     |                       |   |                     |                       |                 |                                   |                       |   |                     |             |   |                     |    |   |                     |         |   |                     |    |    |                      |    |    |                      |    |    |                      |    |    |                      |    |    |                      |    |    |                      |   |
| 8                  | balresvirresults__8                                                   | II<br>R                              |                                                                                                                                                                                                                                                                                                                                                                                                                                                                                                                                                                                                                                                                                                                                                                                                                                                                                                                                                                                                                                                                                                                |                    |  |   |                               |            |                             |                     |               |   |                     |             |   |                     |                       |   |                     |                       |                 |                                   |                       |   |                     |             |   |                     |    |   |                     |         |   |                     |    |    |                      |    |    |                      |    |    |                      |    |    |                      |    |    |                      |    |    |                      |   |
| 9                  | balresvirresults__9                                                   | II                                   |                                                                                                                                                                                                                                                                                                                                                                                                                                                                                                                                                                                                                                                                                                                                                                                                                                                                                                                                                                                                                                                                                                                |                    |  |   |                               |            |                             |                     |               |   |                     |             |   |                     |                       |   |                     |                       |                 |                                   |                       |   |                     |             |   |                     |    |   |                     |         |   |                     |    |    |                      |    |    |                      |    |    |                      |    |    |                      |    |    |                      |    |    |                      |   |
| 10                 | balresvirresults__10                                                  | Ir                                   |                                                                                                                                                                                                                                                                                                                                                                                                                                                                                                                                                                                                                                                                                                                                                                                                                                                                                                                                                                                                                                                                                                                |                    |  |   |                               |            |                             |                     |               |   |                     |             |   |                     |                       |   |                     |                       |                 |                                   |                       |   |                     |             |   |                     |    |   |                     |         |   |                     |    |    |                      |    |    |                      |    |    |                      |    |    |                      |    |    |                      |    |    |                      |   |
| 11                 | balresvirresults__11                                                  | P.                                   |                                                                                                                                                                                                                                                                                                                                                                                                                                                                                                                                                                                                                                                                                                                                                                                                                                                                                                                                                                                                                                                                                                                |                    |  |   |                               |            |                             |                     |               |   |                     |             |   |                     |                       |   |                     |                       |                 |                                   |                       |   |                     |             |   |                     |    |   |                     |         |   |                     |    |    |                      |    |    |                      |    |    |                      |    |    |                      |    |    |                      |    |    |                      |   |
| 12                 | balresvirresults__12                                                  | P.                                   |                                                                                                                                                                                                                                                                                                                                                                                                                                                                                                                                                                                                                                                                                                                                                                                                                                                                                                                                                                                                                                                                                                                |                    |  |   |                               |            |                             |                     |               |   |                     |             |   |                     |                       |   |                     |                       |                 |                                   |                       |   |                     |             |   |                     |    |   |                     |         |   |                     |    |    |                      |    |    |                      |    |    |                      |    |    |                      |    |    |                      |    |    |                      |   |
| 13                 | balresvirresults__13                                                  | P.                                   |                                                                                                                                                                                                                                                                                                                                                                                                                                                                                                                                                                                                                                                                                                                                                                                                                                                                                                                                                                                                                                                                                                                |                    |  |   |                               |            |                             |                     |               |   |                     |             |   |                     |                       |   |                     |                       |                 |                                   |                       |   |                     |             |   |                     |    |   |                     |         |   |                     |    |    |                      |    |    |                      |    |    |                      |    |    |                      |    |    |                      |    |    |                      |   |
| 14                 | balresvirresults__14                                                  | P.                                   |                                                                                                                                                                                                                                                                                                                                                                                                                                                                                                                                                                                                                                                                                                                                                                                                                                                                                                                                                                                                                                                                                                                |                    |  |   |                               |            |                             |                     |               |   |                     |             |   |                     |                       |   |                     |                       |                 |                                   |                       |   |                     |             |   |                     |    |   |                     |         |   |                     |    |    |                      |    |    |                      |    |    |                      |    |    |                      |    |    |                      |    |    |                      |   |
| 15                 | balresvirresults__15                                                  | R                                    |                                                                                                                                                                                                                                                                                                                                                                                                                                                                                                                                                                                                                                                                                                                                                                                                                                                                                                                                                                                                                                                                                                                |                    |  |   |                               |            |                             |                     |               |   |                     |             |   |                     |                       |   |                     |                       |                 |                                   |                       |   |                     |             |   |                     |    |   |                     |         |   |                     |    |    |                      |    |    |                      |    |    |                      |    |    |                      |    |    |                      |    |    |                      |   |
| 936                | balvircxyn                                                            | BAL Viral Culture Sent?              | <table border="1"> <tr><td colspan="2">radio</td></tr> <tr><td>1</td><td>Yes, with positive results...</td></tr> <tr><td>2</td><td>Yes, all negative.</td></tr> <tr><td>3</td><td>No.</td></tr> </table>                                                                                                                                                                                                                                                                                                                                                                                                                                                                                                                                                                                                                                                                                                                                                                                                                                                                                                       | radio              |  | 1 | Yes, with positive results... | 2          | Yes, all negative.          | 3                   | No.           |   |                     |             |   |                     |                       |   |                     |                       |                 |                                   |                       |   |                     |             |   |                     |    |   |                     |         |   |                     |    |    |                      |    |    |                      |    |    |                      |    |    |                      |    |    |                      |    |    |                      |   |
| radio              |                                                                       |                                      |                                                                                                                                                                                                                                                                                                                                                                                                                                                                                                                                                                                                                                                                                                                                                                                                                                                                                                                                                                                                                                                                                                                |                    |  |   |                               |            |                             |                     |               |   |                     |             |   |                     |                       |   |                     |                       |                 |                                   |                       |   |                     |             |   |                     |    |   |                     |         |   |                     |    |    |                      |    |    |                      |    |    |                      |    |    |                      |    |    |                      |    |    |                      |   |
| 1                  | Yes, with positive results...                                         |                                      |                                                                                                                                                                                                                                                                                                                                                                                                                                                                                                                                                                                                                                                                                                                                                                                                                                                                                                                                                                                                                                                                                                                |                    |  |   |                               |            |                             |                     |               |   |                     |             |   |                     |                       |   |                     |                       |                 |                                   |                       |   |                     |             |   |                     |    |   |                     |         |   |                     |    |    |                      |    |    |                      |    |    |                      |    |    |                      |    |    |                      |    |    |                      |   |
| 2                  | Yes, all negative.                                                    |                                      |                                                                                                                                                                                                                                                                                                                                                                                                                                                                                                                                                                                                                                                                                                                                                                                                                                                                                                                                                                                                                                                                                                                |                    |  |   |                               |            |                             |                     |               |   |                     |             |   |                     |                       |   |                     |                       |                 |                                   |                       |   |                     |             |   |                     |    |   |                     |         |   |                     |    |    |                      |    |    |                      |    |    |                      |    |    |                      |    |    |                      |    |    |                      |   |
| 3                  | No.                                                                   |                                      |                                                                                                                                                                                                                                                                                                                                                                                                                                                                                                                                                                                                                                                                                                                                                                                                                                                                                                                                                                                                                                                                                                                |                    |  |   |                               |            |                             |                     |               |   |                     |             |   |                     |                       |   |                     |                       |                 |                                   |                       |   |                     |             |   |                     |    |   |                     |         |   |                     |    |    |                      |    |    |                      |    |    |                      |    |    |                      |    |    |                      |    |    |                      |   |
| 937                | balvircxresults                                                       | BAL Viral Culture Results            | <table border="1"> <tr><td colspan="2">checkbox</td></tr> <tr><td>1</td><td>balvircxresults__1</td><td>adenovirus</td></tr> <tr><td>2</td><td>balvircxresults__2</td><td>influenza A</td></tr> <tr><td>3</td><td>balvircxresults__3</td><td>influenza B</td></tr> <tr><td>4</td><td>balvircxresults__4</td><td>parainfluenza types 1</td></tr> <tr><td>5</td><td>balvircxresults__5</td><td>parainfluenza types 2</td></tr> <tr><td>6</td><td>balvircxresults__6</td><td>parainfluenza types 3</td></tr> <tr><td>7</td><td>balvircxresults__7</td><td>RSV</td></tr> </table>                                                                                                                                                                                                                                                                                                                                                                                                                                                                                                                                   | checkbox           |  | 1 | balvircxresults__1            | adenovirus | 2                           | balvircxresults__2  | influenza A   | 3 | balvircxresults__3  | influenza B | 4 | balvircxresults__4  | parainfluenza types 1 | 5 | balvircxresults__5  | parainfluenza types 2 | 6               | balvircxresults__6                | parainfluenza types 3 | 7 | balvircxresults__7  | RSV         |   |                     |    |   |                     |         |   |                     |    |    |                      |    |    |                      |    |    |                      |    |    |                      |    |    |                      |    |    |                      |   |
| checkbox           |                                                                       |                                      |                                                                                                                                                                                                                                                                                                                                                                                                                                                                                                                                                                                                                                                                                                                                                                                                                                                                                                                                                                                                                                                                                                                |                    |  |   |                               |            |                             |                     |               |   |                     |             |   |                     |                       |   |                     |                       |                 |                                   |                       |   |                     |             |   |                     |    |   |                     |         |   |                     |    |    |                      |    |    |                      |    |    |                      |    |    |                      |    |    |                      |    |    |                      |   |
| 1                  | balvircxresults__1                                                    | adenovirus                           |                                                                                                                                                                                                                                                                                                                                                                                                                                                                                                                                                                                                                                                                                                                                                                                                                                                                                                                                                                                                                                                                                                                |                    |  |   |                               |            |                             |                     |               |   |                     |             |   |                     |                       |   |                     |                       |                 |                                   |                       |   |                     |             |   |                     |    |   |                     |         |   |                     |    |    |                      |    |    |                      |    |    |                      |    |    |                      |    |    |                      |    |    |                      |   |
| 2                  | balvircxresults__2                                                    | influenza A                          |                                                                                                                                                                                                                                                                                                                                                                                                                                                                                                                                                                                                                                                                                                                                                                                                                                                                                                                                                                                                                                                                                                                |                    |  |   |                               |            |                             |                     |               |   |                     |             |   |                     |                       |   |                     |                       |                 |                                   |                       |   |                     |             |   |                     |    |   |                     |         |   |                     |    |    |                      |    |    |                      |    |    |                      |    |    |                      |    |    |                      |    |    |                      |   |
| 3                  | balvircxresults__3                                                    | influenza B                          |                                                                                                                                                                                                                                                                                                                                                                                                                                                                                                                                                                                                                                                                                                                                                                                                                                                                                                                                                                                                                                                                                                                |                    |  |   |                               |            |                             |                     |               |   |                     |             |   |                     |                       |   |                     |                       |                 |                                   |                       |   |                     |             |   |                     |    |   |                     |         |   |                     |    |    |                      |    |    |                      |    |    |                      |    |    |                      |    |    |                      |    |    |                      |   |
| 4                  | balvircxresults__4                                                    | parainfluenza types 1                |                                                                                                                                                                                                                                                                                                                                                                                                                                                                                                                                                                                                                                                                                                                                                                                                                                                                                                                                                                                                                                                                                                                |                    |  |   |                               |            |                             |                     |               |   |                     |             |   |                     |                       |   |                     |                       |                 |                                   |                       |   |                     |             |   |                     |    |   |                     |         |   |                     |    |    |                      |    |    |                      |    |    |                      |    |    |                      |    |    |                      |    |    |                      |   |
| 5                  | balvircxresults__5                                                    | parainfluenza types 2                |                                                                                                                                                                                                                                                                                                                                                                                                                                                                                                                                                                                                                                                                                                                                                                                                                                                                                                                                                                                                                                                                                                                |                    |  |   |                               |            |                             |                     |               |   |                     |             |   |                     |                       |   |                     |                       |                 |                                   |                       |   |                     |             |   |                     |    |   |                     |         |   |                     |    |    |                      |    |    |                      |    |    |                      |    |    |                      |    |    |                      |    |    |                      |   |
| 6                  | balvircxresults__6                                                    | parainfluenza types 3                |                                                                                                                                                                                                                                                                                                                                                                                                                                                                                                                                                                                                                                                                                                                                                                                                                                                                                                                                                                                                                                                                                                                |                    |  |   |                               |            |                             |                     |               |   |                     |             |   |                     |                       |   |                     |                       |                 |                                   |                       |   |                     |             |   |                     |    |   |                     |         |   |                     |    |    |                      |    |    |                      |    |    |                      |    |    |                      |    |    |                      |    |    |                      |   |
| 7                  | balvircxresults__7                                                    | RSV                                  |                                                                                                                                                                                                                                                                                                                                                                                                                                                                                                                                                                                                                                                                                                                                                                                                                                                                                                                                                                                                                                                                                                                |                    |  |   |                               |            |                             |                     |               |   |                     |             |   |                     |                       |   |                     |                       |                 |                                   |                       |   |                     |             |   |                     |    |   |                     |         |   |                     |    |    |                      |    |    |                      |    |    |                      |    |    |                      |    |    |                      |    |    |                      |   |
| 938                | balviralpcrsyn                                                        | BAL Viral PCRs Sent?                 | <table border="1"> <tr><td colspan="2">checkbox</td></tr> <tr><td>1</td><td>balviralpcrsyn__1</td><td>None Sent</td></tr> <tr><td>2</td><td>balviralpcrsyn__2</td><td>CMV</td></tr> <tr><td>3</td><td>balviralpcrsyn__3</td><td>EBV</td></tr> <tr><td>4</td><td>balviralpcrsyn__4</td><td>HHV6</td></tr> <tr><td>5</td><td>balviralpcrsyn__5</td><td>Adenovirus</td></tr> </table>                                                                                                                                                                                                                                                                                                                                                                                                                                                                                                                                                                                                                                                                                                                             | checkbox           |  | 1 | balviralpcrsyn__1             | None Sent  | 2                           | balviralpcrsyn__2   | CMV           | 3 | balviralpcrsyn__3   | EBV         | 4 | balviralpcrsyn__4   | HHV6                  | 5 | balviralpcrsyn__5   | Adenovirus            |                 |                                   |                       |   |                     |             |   |                     |    |   |                     |         |   |                     |    |    |                      |    |    |                      |    |    |                      |    |    |                      |    |    |                      |    |    |                      |   |
| checkbox           |                                                                       |                                      |                                                                                                                                                                                                                                                                                                                                                                                                                                                                                                                                                                                                                                                                                                                                                                                                                                                                                                                                                                                                                                                                                                                |                    |  |   |                               |            |                             |                     |               |   |                     |             |   |                     |                       |   |                     |                       |                 |                                   |                       |   |                     |             |   |                     |    |   |                     |         |   |                     |    |    |                      |    |    |                      |    |    |                      |    |    |                      |    |    |                      |    |    |                      |   |
| 1                  | balviralpcrsyn__1                                                     | None Sent                            |                                                                                                                                                                                                                                                                                                                                                                                                                                                                                                                                                                                                                                                                                                                                                                                                                                                                                                                                                                                                                                                                                                                |                    |  |   |                               |            |                             |                     |               |   |                     |             |   |                     |                       |   |                     |                       |                 |                                   |                       |   |                     |             |   |                     |    |   |                     |         |   |                     |    |    |                      |    |    |                      |    |    |                      |    |    |                      |    |    |                      |    |    |                      |   |
| 2                  | balviralpcrsyn__2                                                     | CMV                                  |                                                                                                                                                                                                                                                                                                                                                                                                                                                                                                                                                                                                                                                                                                                                                                                                                                                                                                                                                                                                                                                                                                                |                    |  |   |                               |            |                             |                     |               |   |                     |             |   |                     |                       |   |                     |                       |                 |                                   |                       |   |                     |             |   |                     |    |   |                     |         |   |                     |    |    |                      |    |    |                      |    |    |                      |    |    |                      |    |    |                      |    |    |                      |   |
| 3                  | balviralpcrsyn__3                                                     | EBV                                  |                                                                                                                                                                                                                                                                                                                                                                                                                                                                                                                                                                                                                                                                                                                                                                                                                                                                                                                                                                                                                                                                                                                |                    |  |   |                               |            |                             |                     |               |   |                     |             |   |                     |                       |   |                     |                       |                 |                                   |                       |   |                     |             |   |                     |    |   |                     |         |   |                     |    |    |                      |    |    |                      |    |    |                      |    |    |                      |    |    |                      |    |    |                      |   |
| 4                  | balviralpcrsyn__4                                                     | HHV6                                 |                                                                                                                                                                                                                                                                                                                                                                                                                                                                                                                                                                                                                                                                                                                                                                                                                                                                                                                                                                                                                                                                                                                |                    |  |   |                               |            |                             |                     |               |   |                     |             |   |                     |                       |   |                     |                       |                 |                                   |                       |   |                     |             |   |                     |    |   |                     |         |   |                     |    |    |                      |    |    |                      |    |    |                      |    |    |                      |    |    |                      |    |    |                      |   |
| 5                  | balviralpcrsyn__5                                                     | Adenovirus                           |                                                                                                                                                                                                                                                                                                                                                                                                                                                                                                                                                                                                                                                                                                                                                                                                                                                                                                                                                                                                                                                                                                                |                    |  |   |                               |            |                             |                     |               |   |                     |             |   |                     |                       |   |                     |                       |                 |                                   |                       |   |                     |             |   |                     |    |   |                     |         |   |                     |    |    |                      |    |    |                      |    |    |                      |    |    |                      |    |    |                      |    |    |                      |   |
| 939                | balcmvpcr1<br>Show the field ONLY if:<br>[balviralpcrsyn(2)] = '1'    | BAL CMV PCR Results                  | <table border="1"> <tr><td colspan="2">radio</td></tr> <tr><td>1</td><td>Undetected</td></tr> <tr><td>2</td><td>Detected but unquantifiable</td></tr> <tr><td>3</td><td>Quantified...</td></tr> </table>                                                                                                                                                                                                                                                                                                                                                                                                                                                                                                                                                                                                                                                                                                                                                                                                                                                                                                       | radio              |  | 1 | Undetected                    | 2          | Detected but unquantifiable | 3                   | Quantified... |   |                     |             |   |                     |                       |   |                     |                       |                 |                                   |                       |   |                     |             |   |                     |    |   |                     |         |   |                     |    |    |                      |    |    |                      |    |    |                      |    |    |                      |    |    |                      |    |    |                      |   |
| radio              |                                                                       |                                      |                                                                                                                                                                                                                                                                                                                                                                                                                                                                                                                                                                                                                                                                                                                                                                                                                                                                                                                                                                                                                                                                                                                |                    |  |   |                               |            |                             |                     |               |   |                     |             |   |                     |                       |   |                     |                       |                 |                                   |                       |   |                     |             |   |                     |    |   |                     |         |   |                     |    |    |                      |    |    |                      |    |    |                      |    |    |                      |    |    |                      |    |    |                      |   |
| 1                  | Undetected                                                            |                                      |                                                                                                                                                                                                                                                                                                                                                                                                                                                                                                                                                                                                                                                                                                                                                                                                                                                                                                                                                                                                                                                                                                                |                    |  |   |                               |            |                             |                     |               |   |                     |             |   |                     |                       |   |                     |                       |                 |                                   |                       |   |                     |             |   |                     |    |   |                     |         |   |                     |    |    |                      |    |    |                      |    |    |                      |    |    |                      |    |    |                      |    |    |                      |   |
| 2                  | Detected but unquantifiable                                           |                                      |                                                                                                                                                                                                                                                                                                                                                                                                                                                                                                                                                                                                                                                                                                                                                                                                                                                                                                                                                                                                                                                                                                                |                    |  |   |                               |            |                             |                     |               |   |                     |             |   |                     |                       |   |                     |                       |                 |                                   |                       |   |                     |             |   |                     |    |   |                     |         |   |                     |    |    |                      |    |    |                      |    |    |                      |    |    |                      |    |    |                      |    |    |                      |   |
| 3                  | Quantified...                                                         |                                      |                                                                                                                                                                                                                                                                                                                                                                                                                                                                                                                                                                                                                                                                                                                                                                                                                                                                                                                                                                                                                                                                                                                |                    |  |   |                               |            |                             |                     |               |   |                     |             |   |                     |                       |   |                     |                       |                 |                                   |                       |   |                     |             |   |                     |    |   |                     |         |   |                     |    |    |                      |    |    |                      |    |    |                      |    |    |                      |    |    |                      |    |    |                      |   |
| 940                | balcmvpcrquant<br>Show the field ONLY if:<br>[balcmvpcr1] = '3'       | BAL CMV PCR Quantity<br><i>IU/mL</i> | text (number)                                                                                                                                                                                                                                                                                                                                                                                                                                                                                                                                                                                                                                                                                                                                                                                                                                                                                                                                                                                                                                                                                                  |                    |  |   |                               |            |                             |                     |               |   |                     |             |   |                     |                       |   |                     |                       |                 |                                   |                       |   |                     |             |   |                     |    |   |                     |         |   |                     |    |    |                      |    |    |                      |    |    |                      |    |    |                      |    |    |                      |    |    |                      |   |
| 941                | balebvpcr<br>Show the field ONLY if:<br>[balviralpcrsyn(3)] = '1'     | BAL EBV PCR Results                  | <table border="1"> <tr><td colspan="2">radio</td></tr> <tr><td>1</td><td>Undetected</td></tr> <tr><td>2</td><td>Detected but unquantifiable</td></tr> <tr><td>3</td><td>Quantified...</td></tr> </table>                                                                                                                                                                                                                                                                                                                                                                                                                                                                                                                                                                                                                                                                                                                                                                                                                                                                                                       | radio              |  | 1 | Undetected                    | 2          | Detected but unquantifiable | 3                   | Quantified... |   |                     |             |   |                     |                       |   |                     |                       |                 |                                   |                       |   |                     |             |   |                     |    |   |                     |         |   |                     |    |    |                      |    |    |                      |    |    |                      |    |    |                      |    |    |                      |    |    |                      |   |
| radio              |                                                                       |                                      |                                                                                                                                                                                                                                                                                                                                                                                                                                                                                                                                                                                                                                                                                                                                                                                                                                                                                                                                                                                                                                                                                                                |                    |  |   |                               |            |                             |                     |               |   |                     |             |   |                     |                       |   |                     |                       |                 |                                   |                       |   |                     |             |   |                     |    |   |                     |         |   |                     |    |    |                      |    |    |                      |    |    |                      |    |    |                      |    |    |                      |    |    |                      |   |
| 1                  | Undetected                                                            |                                      |                                                                                                                                                                                                                                                                                                                                                                                                                                                                                                                                                                                                                                                                                                                                                                                                                                                                                                                                                                                                                                                                                                                |                    |  |   |                               |            |                             |                     |               |   |                     |             |   |                     |                       |   |                     |                       |                 |                                   |                       |   |                     |             |   |                     |    |   |                     |         |   |                     |    |    |                      |    |    |                      |    |    |                      |    |    |                      |    |    |                      |    |    |                      |   |
| 2                  | Detected but unquantifiable                                           |                                      |                                                                                                                                                                                                                                                                                                                                                                                                                                                                                                                                                                                                                                                                                                                                                                                                                                                                                                                                                                                                                                                                                                                |                    |  |   |                               |            |                             |                     |               |   |                     |             |   |                     |                       |   |                     |                       |                 |                                   |                       |   |                     |             |   |                     |    |   |                     |         |   |                     |    |    |                      |    |    |                      |    |    |                      |    |    |                      |    |    |                      |    |    |                      |   |
| 3                  | Quantified...                                                         |                                      |                                                                                                                                                                                                                                                                                                                                                                                                                                                                                                                                                                                                                                                                                                                                                                                                                                                                                                                                                                                                                                                                                                                |                    |  |   |                               |            |                             |                     |               |   |                     |             |   |                     |                       |   |                     |                       |                 |                                   |                       |   |                     |             |   |                     |    |   |                     |         |   |                     |    |    |                      |    |    |                      |    |    |                      |    |    |                      |    |    |                      |    |    |                      |   |



|     |                                                                       |                                                 |                                                                                                                                                                                                                                                                                                                                                                                                                                                                                                                                                                                                                                                                   |   |                               |                            |                             |                       |                                    |   |                       |                    |   |                       |               |   |                       |                    |   |                       |               |   |                       |             |   |                       |                      |
|-----|-----------------------------------------------------------------------|-------------------------------------------------|-------------------------------------------------------------------------------------------------------------------------------------------------------------------------------------------------------------------------------------------------------------------------------------------------------------------------------------------------------------------------------------------------------------------------------------------------------------------------------------------------------------------------------------------------------------------------------------------------------------------------------------------------------------------|---|-------------------------------|----------------------------|-----------------------------|-----------------------|------------------------------------|---|-----------------------|--------------------|---|-----------------------|---------------|---|-----------------------|--------------------|---|-----------------------|---------------|---|-----------------------|-------------|---|-----------------------|----------------------|
| 942 | balebvpcrquant<br>Show the field ONLY if:<br>[balebvpcr] = '3'        | BAL EBV PCR Quantity                            | text (number)                                                                                                                                                                                                                                                                                                                                                                                                                                                                                                                                                                                                                                                     |   |                               |                            |                             |                       |                                    |   |                       |                    |   |                       |               |   |                       |                    |   |                       |               |   |                       |             |   |                       |                      |
| 943 | balhhv6pcr<br>Show the field ONLY if:<br>[balviralpcrsyn(4)] = '1'    | BAL HHV6 PCR Results                            | radio<br><table border="1"> <tr><td>1</td><td>Undetected</td></tr> <tr><td>2</td><td>Detected but unquantifiable</td></tr> <tr><td>3</td><td>Quantified...</td></tr> </table>                                                                                                                                                                                                                                                                                                                                                                                                                                                                                     | 1 | Undetected                    | 2                          | Detected but unquantifiable | 3                     | Quantified...                      |   |                       |                    |   |                       |               |   |                       |                    |   |                       |               |   |                       |             |   |                       |                      |
| 1   | Undetected                                                            |                                                 |                                                                                                                                                                                                                                                                                                                                                                                                                                                                                                                                                                                                                                                                   |   |                               |                            |                             |                       |                                    |   |                       |                    |   |                       |               |   |                       |                    |   |                       |               |   |                       |             |   |                       |                      |
| 2   | Detected but unquantifiable                                           |                                                 |                                                                                                                                                                                                                                                                                                                                                                                                                                                                                                                                                                                                                                                                   |   |                               |                            |                             |                       |                                    |   |                       |                    |   |                       |               |   |                       |                    |   |                       |               |   |                       |             |   |                       |                      |
| 3   | Quantified...                                                         |                                                 |                                                                                                                                                                                                                                                                                                                                                                                                                                                                                                                                                                                                                                                                   |   |                               |                            |                             |                       |                                    |   |                       |                    |   |                       |               |   |                       |                    |   |                       |               |   |                       |             |   |                       |                      |
| 944 | balhhv6pcrquant<br>Show the field ONLY if:<br>[balhhv6pcr] = '3'      | BAL HHV6 PCR Quantity<br><i>copies/mL</i>       | text (number)                                                                                                                                                                                                                                                                                                                                                                                                                                                                                                                                                                                                                                                     |   |                               |                            |                             |                       |                                    |   |                       |                    |   |                       |               |   |                       |                    |   |                       |               |   |                       |             |   |                       |                      |
| 945 | baladenopcr<br>Show the field ONLY if:<br>[balviralpcrsyn(5)] = '1'   | BAL Adenovirus PCR Results                      | radio<br><table border="1"> <tr><td>1</td><td>Undetected</td></tr> <tr><td>2</td><td>Detected but unquantifiable</td></tr> <tr><td>3</td><td>Quantified...</td></tr> </table>                                                                                                                                                                                                                                                                                                                                                                                                                                                                                     | 1 | Undetected                    | 2                          | Detected but unquantifiable | 3                     | Quantified...                      |   |                       |                    |   |                       |               |   |                       |                    |   |                       |               |   |                       |             |   |                       |                      |
| 1   | Undetected                                                            |                                                 |                                                                                                                                                                                                                                                                                                                                                                                                                                                                                                                                                                                                                                                                   |   |                               |                            |                             |                       |                                    |   |                       |                    |   |                       |               |   |                       |                    |   |                       |               |   |                       |             |   |                       |                      |
| 2   | Detected but unquantifiable                                           |                                                 |                                                                                                                                                                                                                                                                                                                                                                                                                                                                                                                                                                                                                                                                   |   |                               |                            |                             |                       |                                    |   |                       |                    |   |                       |               |   |                       |                    |   |                       |               |   |                       |             |   |                       |                      |
| 3   | Quantified...                                                         |                                                 |                                                                                                                                                                                                                                                                                                                                                                                                                                                                                                                                                                                                                                                                   |   |                               |                            |                             |                       |                                    |   |                       |                    |   |                       |               |   |                       |                    |   |                       |               |   |                       |             |   |                       |                      |
| 946 | baladenopcrquant<br>Show the field ONLY if:<br>[baladenopcr] = '3'    | BAL Adenovirus PCR Quantity<br><i>copies/mL</i> | text (number)                                                                                                                                                                                                                                                                                                                                                                                                                                                                                                                                                                                                                                                     |   |                               |                            |                             |                       |                                    |   |                       |                    |   |                       |               |   |                       |                    |   |                       |               |   |                       |             |   |                       |                      |
| 947 | balfungacxyn                                                          | BAL Fungal Culture Sent?                        | radio<br><table border="1"> <tr><td>1</td><td>Yes, with positive results</td></tr> <tr><td>2</td><td>Yes, all negative</td></tr> <tr><td>3</td><td>No</td></tr> </table>                                                                                                                                                                                                                                                                                                                                                                                                                                                                                          | 1 | Yes, with positive results    | 2                          | Yes, all negative           | 3                     | No                                 |   |                       |                    |   |                       |               |   |                       |                    |   |                       |               |   |                       |             |   |                       |                      |
| 1   | Yes, with positive results                                            |                                                 |                                                                                                                                                                                                                                                                                                                                                                                                                                                                                                                                                                                                                                                                   |   |                               |                            |                             |                       |                                    |   |                       |                    |   |                       |               |   |                       |                    |   |                       |               |   |                       |             |   |                       |                      |
| 2   | Yes, all negative                                                     |                                                 |                                                                                                                                                                                                                                                                                                                                                                                                                                                                                                                                                                                                                                                                   |   |                               |                            |                             |                       |                                    |   |                       |                    |   |                       |               |   |                       |                    |   |                       |               |   |                       |             |   |                       |                      |
| 3   | No                                                                    |                                                 |                                                                                                                                                                                                                                                                                                                                                                                                                                                                                                                                                                                                                                                                   |   |                               |                            |                             |                       |                                    |   |                       |                    |   |                       |               |   |                       |                    |   |                       |               |   |                       |             |   |                       |                      |
| 948 | balfungalcxresults<br>Show the field ONLY if:<br>[balfungacxyn] = '1' | BAL Fungal Cultures Results                     | checkbox, Required<br><table border="1"> <tr><td>1</td><td>balfungalcxresults__1</td><td>Candida species</td></tr> <tr><td>2</td><td>balfungalcxresults__2</td><td>Aspergillus species</td></tr> <tr><td>3</td><td>balfungalcxresults__3</td><td>Blastomyces</td></tr> <tr><td>4</td><td>balfungalcxresults__4</td><td>Mucor species</td></tr> <tr><td>5</td><td>balfungalcxresults__5</td><td>Torulopsis species</td></tr> <tr><td>6</td><td>balfungalcxresults__6</td><td>Coccidiomyces</td></tr> <tr><td>7</td><td>balfungalcxresults__7</td><td>Histoplasma</td></tr> <tr><td>8</td><td>balfungalcxresults__8</td><td>Other fungal species</td></tr> </table> | 1 | balfungalcxresults__1         | Candida species            | 2                           | balfungalcxresults__2 | Aspergillus species                | 3 | balfungalcxresults__3 | Blastomyces        | 4 | balfungalcxresults__4 | Mucor species | 5 | balfungalcxresults__5 | Torulopsis species | 6 | balfungalcxresults__6 | Coccidiomyces | 7 | balfungalcxresults__7 | Histoplasma | 8 | balfungalcxresults__8 | Other fungal species |
| 1   | balfungalcxresults__1                                                 | Candida species                                 |                                                                                                                                                                                                                                                                                                                                                                                                                                                                                                                                                                                                                                                                   |   |                               |                            |                             |                       |                                    |   |                       |                    |   |                       |               |   |                       |                    |   |                       |               |   |                       |             |   |                       |                      |
| 2   | balfungalcxresults__2                                                 | Aspergillus species                             |                                                                                                                                                                                                                                                                                                                                                                                                                                                                                                                                                                                                                                                                   |   |                               |                            |                             |                       |                                    |   |                       |                    |   |                       |               |   |                       |                    |   |                       |               |   |                       |             |   |                       |                      |
| 3   | balfungalcxresults__3                                                 | Blastomyces                                     |                                                                                                                                                                                                                                                                                                                                                                                                                                                                                                                                                                                                                                                                   |   |                               |                            |                             |                       |                                    |   |                       |                    |   |                       |               |   |                       |                    |   |                       |               |   |                       |             |   |                       |                      |
| 4   | balfungalcxresults__4                                                 | Mucor species                                   |                                                                                                                                                                                                                                                                                                                                                                                                                                                                                                                                                                                                                                                                   |   |                               |                            |                             |                       |                                    |   |                       |                    |   |                       |               |   |                       |                    |   |                       |               |   |                       |             |   |                       |                      |
| 5   | balfungalcxresults__5                                                 | Torulopsis species                              |                                                                                                                                                                                                                                                                                                                                                                                                                                                                                                                                                                                                                                                                   |   |                               |                            |                             |                       |                                    |   |                       |                    |   |                       |               |   |                       |                    |   |                       |               |   |                       |             |   |                       |                      |
| 6   | balfungalcxresults__6                                                 | Coccidiomyces                                   |                                                                                                                                                                                                                                                                                                                                                                                                                                                                                                                                                                                                                                                                   |   |                               |                            |                             |                       |                                    |   |                       |                    |   |                       |               |   |                       |                    |   |                       |               |   |                       |             |   |                       |                      |
| 7   | balfungalcxresults__7                                                 | Histoplasma                                     |                                                                                                                                                                                                                                                                                                                                                                                                                                                                                                                                                                                                                                                                   |   |                               |                            |                             |                       |                                    |   |                       |                    |   |                       |               |   |                       |                    |   |                       |               |   |                       |             |   |                       |                      |
| 8   | balfungalcxresults__8                                                 | Other fungal species                            |                                                                                                                                                                                                                                                                                                                                                                                                                                                                                                                                                                                                                                                                   |   |                               |                            |                             |                       |                                    |   |                       |                    |   |                       |               |   |                       |                    |   |                       |               |   |                       |             |   |                       |                      |
| 949 | balgalactoyln                                                         | BAL Galactomanan level sent?                    | radio<br><table border="1"> <tr><td>1</td><td>Yes</td></tr> <tr><td>2</td><td>No</td></tr> </table>                                                                                                                                                                                                                                                                                                                                                                                                                                                                                                                                                               | 1 | Yes                           | 2                          | No                          |                       |                                    |   |                       |                    |   |                       |               |   |                       |                    |   |                       |               |   |                       |             |   |                       |                      |
| 1   | Yes                                                                   |                                                 |                                                                                                                                                                                                                                                                                                                                                                                                                                                                                                                                                                                                                                                                   |   |                               |                            |                             |                       |                                    |   |                       |                    |   |                       |               |   |                       |                    |   |                       |               |   |                       |             |   |                       |                      |
| 2   | No                                                                    |                                                 |                                                                                                                                                                                                                                                                                                                                                                                                                                                                                                                                                                                                                                                                   |   |                               |                            |                             |                       |                                    |   |                       |                    |   |                       |               |   |                       |                    |   |                       |               |   |                       |             |   |                       |                      |
| 950 | balgalactolevel<br>Show the field ONLY if:<br>[balgalactoyln] = '1'   | BAL Galactomanan level                          | text (number)                                                                                                                                                                                                                                                                                                                                                                                                                                                                                                                                                                                                                                                     |   |                               |                            |                             |                       |                                    |   |                       |                    |   |                       |               |   |                       |                    |   |                       |               |   |                       |             |   |                       |                      |
| 951 | balafbcxyn                                                            | BAL AFB Culture Sent?                           | radio<br><table border="1"> <tr><td>1</td><td>Yes, with positive results...</td></tr> <tr><td>2</td><td>Yes, all negative</td></tr> <tr><td>3</td><td>No</td></tr> </table>                                                                                                                                                                                                                                                                                                                                                                                                                                                                                       | 1 | Yes, with positive results... | 2                          | Yes, all negative           | 3                     | No                                 |   |                       |                    |   |                       |               |   |                       |                    |   |                       |               |   |                       |             |   |                       |                      |
| 1   | Yes, with positive results...                                         |                                                 |                                                                                                                                                                                                                                                                                                                                                                                                                                                                                                                                                                                                                                                                   |   |                               |                            |                             |                       |                                    |   |                       |                    |   |                       |               |   |                       |                    |   |                       |               |   |                       |             |   |                       |                      |
| 2   | Yes, all negative                                                     |                                                 |                                                                                                                                                                                                                                                                                                                                                                                                                                                                                                                                                                                                                                                                   |   |                               |                            |                             |                       |                                    |   |                       |                    |   |                       |               |   |                       |                    |   |                       |               |   |                       |             |   |                       |                      |
| 3   | No                                                                    |                                                 |                                                                                                                                                                                                                                                                                                                                                                                                                                                                                                                                                                                                                                                                   |   |                               |                            |                             |                       |                                    |   |                       |                    |   |                       |               |   |                       |                    |   |                       |               |   |                       |             |   |                       |                      |
| 952 | balafbcxresults<br>Show the field ONLY if:<br>[balafbcxyn] = '1'      | BAL AFB Culture Results                         | checkbox, Required<br><table border="1"> <tr><td>1</td><td>balafbcxresults__1</td><td>Mycobacterium tuberculosis</td></tr> <tr><td>2</td><td>balafbcxresults__2</td><td>Mycobacterium Avium-Intracellulare</td></tr> <tr><td>3</td><td>balafbcxresults__3</td><td>Mycobacteria other</td></tr> </table>                                                                                                                                                                                                                                                                                                                                                           | 1 | balafbcxresults__1            | Mycobacterium tuberculosis | 2                           | balafbcxresults__2    | Mycobacterium Avium-Intracellulare | 3 | balafbcxresults__3    | Mycobacteria other |   |                       |               |   |                       |                    |   |                       |               |   |                       |             |   |                       |                      |
| 1   | balafbcxresults__1                                                    | Mycobacterium tuberculosis                      |                                                                                                                                                                                                                                                                                                                                                                                                                                                                                                                                                                                                                                                                   |   |                               |                            |                             |                       |                                    |   |                       |                    |   |                       |               |   |                       |                    |   |                       |               |   |                       |             |   |                       |                      |
| 2   | balafbcxresults__2                                                    | Mycobacterium Avium-Intracellulare              |                                                                                                                                                                                                                                                                                                                                                                                                                                                                                                                                                                                                                                                                   |   |                               |                            |                             |                       |                                    |   |                       |                    |   |                       |               |   |                       |                    |   |                       |               |   |                       |             |   |                       |                      |
| 3   | balafbcxresults__3                                                    | Mycobacteria other                              |                                                                                                                                                                                                                                                                                                                                                                                                                                                                                                                                                                                                                                                                   |   |                               |                            |                             |                       |                                    |   |                       |                    |   |                       |               |   |                       |                    |   |                       |               |   |                       |             |   |                       |                      |
| 953 | balpcpdfayn                                                           | BAL PCP DFA Sent?                               | radio<br><table border="1"> <tr><td>1</td><td>Yes, positive</td></tr> <tr><td>2</td><td>Yes, negative</td></tr> <tr><td>3</td><td>No.</td></tr> </table>                                                                                                                                                                                                                                                                                                                                                                                                                                                                                                          | 1 | Yes, positive                 | 2                          | Yes, negative               | 3                     | No.                                |   |                       |                    |   |                       |               |   |                       |                    |   |                       |               |   |                       |             |   |                       |                      |
| 1   | Yes, positive                                                         |                                                 |                                                                                                                                                                                                                                                                                                                                                                                                                                                                                                                                                                                                                                                                   |   |                               |                            |                             |                       |                                    |   |                       |                    |   |                       |               |   |                       |                    |   |                       |               |   |                       |             |   |                       |                      |
| 2   | Yes, negative                                                         |                                                 |                                                                                                                                                                                                                                                                                                                                                                                                                                                                                                                                                                                                                                                                   |   |                               |                            |                             |                       |                                    |   |                       |                    |   |                       |               |   |                       |                    |   |                       |               |   |                       |             |   |                       |                      |
| 3   | No.                                                                   |                                                 |                                                                                                                                                                                                                                                                                                                                                                                                                                                                                                                                                                                                                                                                   |   |                               |                            |                             |                       |                                    |   |                       |                    |   |                       |               |   |                       |                    |   |                       |               |   |                       |             |   |                       |                      |
| 954 | balpcppcryn                                                           | BAL PCP PCR Sent?                               | radio<br><table border="1"> <tr><td>1</td><td>Yes, with positive results...</td></tr> <tr><td>2</td><td>Yes, negative</td></tr> <tr><td>3</td><td>No</td></tr> </table>                                                                                                                                                                                                                                                                                                                                                                                                                                                                                           | 1 | Yes, with positive results... | 2                          | Yes, negative               | 3                     | No                                 |   |                       |                    |   |                       |               |   |                       |                    |   |                       |               |   |                       |             |   |                       |                      |
| 1   | Yes, with positive results...                                         |                                                 |                                                                                                                                                                                                                                                                                                                                                                                                                                                                                                                                                                                                                                                                   |   |                               |                            |                             |                       |                                    |   |                       |                    |   |                       |               |   |                       |                    |   |                       |               |   |                       |             |   |                       |                      |
| 2   | Yes, negative                                                         |                                                 |                                                                                                                                                                                                                                                                                                                                                                                                                                                                                                                                                                                                                                                                   |   |                               |                            |                             |                       |                                    |   |                       |                    |   |                       |               |   |                       |                    |   |                       |               |   |                       |             |   |                       |                      |
| 3   | No                                                                    |                                                 |                                                                                                                                                                                                                                                                                                                                                                                                                                                                                                                                                                                                                                                                   |   |                               |                            |                             |                       |                                    |   |                       |                    |   |                       |               |   |                       |                    |   |                       |               |   |                       |             |   |                       |                      |
| 955 | balpcppcrquant                                                        | BAL PCP PCR Quantity                            | text (number), Required                                                                                                                                                                                                                                                                                                                                                                                                                                                                                                                                                                                                                                           |   |                               |                            |                             |                       |                                    |   |                       |                    |   |                       |               |   |                       |                    |   |                       |               |   |                       |             |   |                       |                      |

|     |                                                                      |                                                                                                  |                           |
|-----|----------------------------------------------------------------------|--------------------------------------------------------------------------------------------------|---------------------------|
| 956 | balbdglucanyn                                                        | BAL (1,3)-Beta-D-Glucan level sent?                                                              | radio<br>1 Yes<br>2 No    |
| 957 | balbdglucanlevel<br>Show the field ONLY if:<br>[balbdglucanyn] = '1' | BAL (1,3)-Beta-D-Glucan level                                                                    | text (number)             |
| 958 | balmalignancy                                                        | Malignancy by cytology or biopsy?                                                                | yesno<br>1 Yes<br>0 No    |
| 959 | drugrxn                                                              | Drug reaction by cytology or biopsy?                                                             | yesno<br>1 Yes<br>0 No    |
| 960 | hct3bal                                                              | Section Header: <i>Blood Test Results</i><br>HCT                                                 | text                      |
| 961 | hemoglobin3bal                                                       | Hemoglobin                                                                                       | text                      |
| 962 | wbc3bal                                                              | WBC                                                                                              | text                      |
| 963 | neutrophils3bal                                                      | Neutrophils                                                                                      | text                      |
| 964 | platelets3bal                                                        | Platelets /mm3                                                                                   | text                      |
| 965 | sodium3bal                                                           | Sodium meq/L                                                                                     | text                      |
| 966 | potassium3bal                                                        | Potassium meq/L                                                                                  | text                      |
| 967 | bun3bal                                                              | BUN mg/dL                                                                                        | text                      |
| 968 | creatinine3bal                                                       | Creatinine mg/dL                                                                                 | text                      |
| 969 | glucose3bal                                                          | Glucose mg/dL                                                                                    | text                      |
| 970 | albumin3bal                                                          | Albumin g/dL                                                                                     | text                      |
| 971 | bilirubin3bal                                                        | Bilirubin mg/dL                                                                                  | text                      |
| 972 | inr_3bal                                                             | INR<br><i>If not please write N/A</i>                                                            | text                      |
| 973 | ptt3bal                                                              | PTT<br><i>If not please write N/A</i>                                                            | text                      |
| 974 | troponin_3bal                                                        | Troponin<br><i>If not please write N/A</i>                                                       | text                      |
| 975 | bicarbonate3bal                                                      | Bicarbonate meq/L                                                                                | text                      |
| 976 | lactate3bal                                                          | Lactate meq/L                                                                                    | text                      |
| 977 | gfr_3bal                                                             | Section Header: <i>Kidney Function</i><br>GFR                                                    | text                      |
| 978 | bun_creat_3bal                                                       | BUN/Creatinine ratio                                                                             | text                      |
| 979 | urine_protein_3bal                                                   | Urine Protein                                                                                    | text                      |
| 980 | urine_creatinine_3bal                                                | Urine creatinine                                                                                 | text                      |
| 981 | osmolality_urinebal                                                  | Osmolality Urine                                                                                 | text                      |
| 982 | urine_na_3bal                                                        | Urine Na                                                                                         | text                      |
| 983 | urine_k_3bal                                                         | Urine K                                                                                          | text                      |
| 984 | abg3bal                                                              | Section Header: <i>ABG</i><br>Arterial Blood Gas<br><i>Please record the ABG closer to 8 am.</i> | dropdown<br>1 Yes<br>0 No |
| 985 | intubation_abg3bal<br>Show the field ONLY if:<br>[abg3bal] = '1'     | Was the patient intubated at the time of the ABG?                                                | dropdown<br>1 Yes<br>0 No |
| 986 | po23bal<br>Show the field ONLY if:<br>[abg3bal] = '1'                | PO2                                                                                              | text                      |
| 987 | co23bal<br>Show the field ONLY if:<br>[abg3bal] = '1'                | PCo2                                                                                             | text                      |
| 988 | ph3bal<br>Show the field ONLY if:<br>[abg3bal] = '1'                 | Ph                                                                                               | text                      |
| 989 | fio2def3bal                                                          | FiO2 when the ABG was taken?                                                                     | text                      |

|      |                                                                                                      |                                                                                                                       |                                                                                                                                                                                                                |   |                      |   |                                         |   |              |
|------|------------------------------------------------------------------------------------------------------|-----------------------------------------------------------------------------------------------------------------------|----------------------------------------------------------------------------------------------------------------------------------------------------------------------------------------------------------------|---|----------------------|---|-----------------------------------------|---|--------------|
| 990  | central_venous_gas_3bal                                                                              | Central Venous Gas                                                                                                    | dropdown<br><table border="1"> <tr> <td>1</td> <td>Yes</td> </tr> <tr> <td>0</td> <td>No</td> </tr> </table>                                                                                                   | 1 | Yes                  | 0 | No                                      |   |              |
| 1    | Yes                                                                                                  |                                                                                                                       |                                                                                                                                                                                                                |   |                      |   |                                         |   |              |
| 0    | No                                                                                                   |                                                                                                                       |                                                                                                                                                                                                                |   |                      |   |                                         |   |              |
| 991  | central_venous_pco2_3bal<br>Show the field ONLY if:<br>[central_venous_gas_3bal] = '1'               | Central Venous PCo2                                                                                                   | text                                                                                                                                                                                                           |   |                      |   |                                         |   |              |
| 992  | central_venous_po2_3bal<br>Show the field ONLY if:<br>[central_venous_gas_3bal] = '1'                | Central Venous PO2                                                                                                    | text                                                                                                                                                                                                           |   |                      |   |                                         |   |              |
| 993  | central_venous_so2_3bal<br>Show the field ONLY if:<br>[central_venous_gas_3bal] = '1'                | Central Venous SO2                                                                                                    | text                                                                                                                                                                                                           |   |                      |   |                                         |   |              |
| 994  | mixed_venous_gas_3bal                                                                                | Mixed Venous Gas                                                                                                      | dropdown<br><table border="1"> <tr> <td>1</td> <td>Yes</td> </tr> <tr> <td>0</td> <td>No</td> </tr> </table>                                                                                                   | 1 | Yes                  | 0 | No                                      |   |              |
| 1    | Yes                                                                                                  |                                                                                                                       |                                                                                                                                                                                                                |   |                      |   |                                         |   |              |
| 0    | No                                                                                                   |                                                                                                                       |                                                                                                                                                                                                                |   |                      |   |                                         |   |              |
| 995  | mixed_venous_pco2_3bal<br>Show the field ONLY if:<br>[mixed_venous_gas_3bal] = '1'                   | Mixed Venous PCo2                                                                                                     | text                                                                                                                                                                                                           |   |                      |   |                                         |   |              |
| 996  | mixed_venous_po2_3bal<br>Show the field ONLY if:<br>[mixed_venous_gas_3bal] = '1'                    | Mixed Venous PO2                                                                                                      | text                                                                                                                                                                                                           |   |                      |   |                                         |   |              |
| 997  | mixed_venous_so2_3bal<br>Show the field ONLY if:<br>[mixed_venous_gas_3bal] = '1'                    | Mixed Venous SO2                                                                                                      | text                                                                                                                                                                                                           |   |                      |   |                                         |   |              |
| 998  | cvpyesno3bal                                                                                         | Section Header: <i>Other</i><br>Central Venous Pressure measured?                                                     | dropdown<br><table border="1"> <tr> <td>1</td> <td>Yes</td> </tr> <tr> <td>0</td> <td>No</td> </tr> </table>                                                                                                   | 1 | Yes                  | 0 | No                                      |   |              |
| 1    | Yes                                                                                                  |                                                                                                                       |                                                                                                                                                                                                                |   |                      |   |                                         |   |              |
| 0    | No                                                                                                   |                                                                                                                       |                                                                                                                                                                                                                |   |                      |   |                                         |   |              |
| 999  | cvp3bal<br>Show the field ONLY if:<br>[cvpyesno3bal] = '1'                                           | CVP cm H2 High<br><i>Please record the highest in the last 24 hr</i>                                                  | text                                                                                                                                                                                                           |   |                      |   |                                         |   |              |
| 1000 | cvp32_3bdbal<br>Show the field ONLY if:<br>[cvpyesno3bal] = '1'                                      | CVP cm H2 Low<br><i>Please record the lowest in the last 24 hr</i>                                                    | text                                                                                                                                                                                                           |   |                      |   |                                         |   |              |
| 1001 | iv_fluids_3bal                                                                                       | Total IV fluids given in the previous 24 hr                                                                           | text                                                                                                                                                                                                           |   |                      |   |                                         |   |              |
| 1002 | urinary_output3bal                                                                                   | Urinary Output CC/day<br><i>Please record the average in the last 24 hours.</i>                                       | text                                                                                                                                                                                                           |   |                      |   |                                         |   |              |
| 1003 | arf3bal                                                                                              | Acute renal failure                                                                                                   | dropdown<br><table border="1"> <tr> <td>1</td> <td>Yes</td> </tr> <tr> <td>2</td> <td>No</td> </tr> </table>                                                                                                   | 1 | Yes                  | 2 | No                                      |   |              |
| 1    | Yes                                                                                                  |                                                                                                                       |                                                                                                                                                                                                                |   |                      |   |                                         |   |              |
| 2    | No                                                                                                   |                                                                                                                       |                                                                                                                                                                                                                |   |                      |   |                                         |   |              |
| 1004 | cardiac_output3bal                                                                                   | Cardiac Output                                                                                                        | dropdown<br><table border="1"> <tr> <td>1</td> <td>Measured with NICCOM</td> </tr> <tr> <td>2</td> <td>Measured with Pulmonary artery catheter</td> </tr> <tr> <td>0</td> <td>Not measured</td> </tr> </table> | 1 | Measured with NICCOM | 2 | Measured with Pulmonary artery catheter | 0 | Not measured |
| 1    | Measured with NICCOM                                                                                 |                                                                                                                       |                                                                                                                                                                                                                |   |                      |   |                                         |   |              |
| 2    | Measured with Pulmonary artery catheter                                                              |                                                                                                                       |                                                                                                                                                                                                                |   |                      |   |                                         |   |              |
| 0    | Not measured                                                                                         |                                                                                                                       |                                                                                                                                                                                                                |   |                      |   |                                         |   |              |
| 1005 | co_value_3bal<br>Show the field ONLY if:<br>[cardiac_output3bal] = '1' or [cardiac_output3bal] = '2' | Cardiac Output Value                                                                                                  | text                                                                                                                                                                                                           |   |                      |   |                                         |   |              |
| 1006 | stroke_volume3bal                                                                                    | Stroke Volume                                                                                                         | text                                                                                                                                                                                                           |   |                      |   |                                         |   |              |
| 1007 | cardiac_index3bal                                                                                    | Cardiac Index                                                                                                         | text                                                                                                                                                                                                           |   |                      |   |                                         |   |              |
| 1008 | vassopressors3bal                                                                                    | Section Header: <i>Vasopressors at time of Bronchoscopy</i><br>Was the patient on vasopressors prior to bronchoscopy? | dropdown<br><table border="1"> <tr> <td>1</td> <td>Yes</td> </tr> <tr> <td>0</td> <td>No</td> </tr> </table>                                                                                                   | 1 | Yes                  | 0 | No                                      |   |              |
| 1    | Yes                                                                                                  |                                                                                                                       |                                                                                                                                                                                                                |   |                      |   |                                         |   |              |
| 0    | No                                                                                                   |                                                                                                                       |                                                                                                                                                                                                                |   |                      |   |                                         |   |              |
| 1009 | number_vassopressors3bal<br>Show the field ONLY if:<br>[vassopressors3bal] = '1'                     | How many vasopressors?                                                                                                | text                                                                                                                                                                                                           |   |                      |   |                                         |   |              |

|      |                                                                                           |                                                                                          |                                                                                                                                                                                                                                                                                                                                                                                                                                                                                                                                                                                                          |   |                           |          |   |                           |            |   |                           |                |   |                           |             |   |                           |               |   |                           |           |   |                           |             |
|------|-------------------------------------------------------------------------------------------|------------------------------------------------------------------------------------------|----------------------------------------------------------------------------------------------------------------------------------------------------------------------------------------------------------------------------------------------------------------------------------------------------------------------------------------------------------------------------------------------------------------------------------------------------------------------------------------------------------------------------------------------------------------------------------------------------------|---|---------------------------|----------|---|---------------------------|------------|---|---------------------------|----------------|---|---------------------------|-------------|---|---------------------------|---------------|---|---------------------------|-----------|---|---------------------------|-------------|
| 1010 | name_vassopressors3bal<br>Show the field ONLY if:<br>[vassopressors3bal] = '1'            | Vassopressors used?                                                                      | checkbox<br><table border="1"> <tr> <td>1</td> <td>name_vassopressors3bal__1</td> <td>Dopamine</td> </tr> <tr> <td>2</td> <td>name_vassopressors3bal__2</td> <td>Dobutamine</td> </tr> <tr> <td>3</td> <td>name_vassopressors3bal__3</td> <td>Norepinephrine</td> </tr> <tr> <td>4</td> <td>name_vassopressors3bal__4</td> <td>Epinephrine</td> </tr> <tr> <td>5</td> <td>name_vassopressors3bal__5</td> <td>Phenylephrine</td> </tr> <tr> <td>6</td> <td>name_vassopressors3bal__6</td> <td>Milrinone</td> </tr> <tr> <td>7</td> <td>name_vassopressors3bal__7</td> <td>Vasopressin</td> </tr> </table> | 1 | name_vassopressors3bal__1 | Dopamine | 2 | name_vassopressors3bal__2 | Dobutamine | 3 | name_vassopressors3bal__3 | Norepinephrine | 4 | name_vassopressors3bal__4 | Epinephrine | 5 | name_vassopressors3bal__5 | Phenylephrine | 6 | name_vassopressors3bal__6 | Milrinone | 7 | name_vassopressors3bal__7 | Vasopressin |
| 1    | name_vassopressors3bal__1                                                                 | Dopamine                                                                                 |                                                                                                                                                                                                                                                                                                                                                                                                                                                                                                                                                                                                          |   |                           |          |   |                           |            |   |                           |                |   |                           |             |   |                           |               |   |                           |           |   |                           |             |
| 2    | name_vassopressors3bal__2                                                                 | Dobutamine                                                                               |                                                                                                                                                                                                                                                                                                                                                                                                                                                                                                                                                                                                          |   |                           |          |   |                           |            |   |                           |                |   |                           |             |   |                           |               |   |                           |           |   |                           |             |
| 3    | name_vassopressors3bal__3                                                                 | Norepinephrine                                                                           |                                                                                                                                                                                                                                                                                                                                                                                                                                                                                                                                                                                                          |   |                           |          |   |                           |            |   |                           |                |   |                           |             |   |                           |               |   |                           |           |   |                           |             |
| 4    | name_vassopressors3bal__4                                                                 | Epinephrine                                                                              |                                                                                                                                                                                                                                                                                                                                                                                                                                                                                                                                                                                                          |   |                           |          |   |                           |            |   |                           |                |   |                           |             |   |                           |               |   |                           |           |   |                           |             |
| 5    | name_vassopressors3bal__5                                                                 | Phenylephrine                                                                            |                                                                                                                                                                                                                                                                                                                                                                                                                                                                                                                                                                                                          |   |                           |          |   |                           |            |   |                           |                |   |                           |             |   |                           |               |   |                           |           |   |                           |             |
| 6    | name_vassopressors3bal__6                                                                 | Milrinone                                                                                |                                                                                                                                                                                                                                                                                                                                                                                                                                                                                                                                                                                                          |   |                           |          |   |                           |            |   |                           |                |   |                           |             |   |                           |               |   |                           |           |   |                           |             |
| 7    | name_vassopressors3bal__7                                                                 | Vasopressin                                                                              |                                                                                                                                                                                                                                                                                                                                                                                                                                                                                                                                                                                                          |   |                           |          |   |                           |            |   |                           |                |   |                           |             |   |                           |               |   |                           |           |   |                           |             |
| 1011 | dopa_dose3bal<br>Show the field ONLY if:<br>[name_vassopressors3bal(1)] = '1'             | Dopamine Dose mcg/min (HIGH)<br><i>Please record the highest in the last 24 hr</i>       | text                                                                                                                                                                                                                                                                                                                                                                                                                                                                                                                                                                                                     |   |                           |          |   |                           |            |   |                           |                |   |                           |             |   |                           |               |   |                           |           |   |                           |             |
| 1012 | dopa_dose32_96abal<br>Show the field ONLY if:<br>[name_vassopressors3bal(1)] = '1'        | Dopamine Dose mcg/Kg/min (HIGH)                                                          | calc<br>Calculation: [dopa_dose3bal]/[weight]                                                                                                                                                                                                                                                                                                                                                                                                                                                                                                                                                            |   |                           |          |   |                           |            |   |                           |                |   |                           |             |   |                           |               |   |                           |           |   |                           |             |
| 1013 | dopa_dose32_ae5bal<br>Show the field ONLY if:<br>[name_vassopressors3bal(1)] = '1'        | Dopamine Dose mcg/min (LOW)<br><i>Please record the lowest in the last 24 hr</i>         | text                                                                                                                                                                                                                                                                                                                                                                                                                                                                                                                                                                                                     |   |                           |          |   |                           |            |   |                           |                |   |                           |             |   |                           |               |   |                           |           |   |                           |             |
| 1014 | dopa_dose32_96a2_86fbal<br>Show the field ONLY if:<br>[name_vassopressors3bal(1)] = '1'   | Dopamine Dose mcg/Kg/min (LOW)                                                           | calc<br>Calculation: [dopa_dose32_ae5bal]/[weight]                                                                                                                                                                                                                                                                                                                                                                                                                                                                                                                                                       |   |                           |          |   |                           |            |   |                           |                |   |                           |             |   |                           |               |   |                           |           |   |                           |             |
| 1015 | dobuta_dose3bal<br>Show the field ONLY if:<br>[name_vassopressors3bal(2)] = '1'           | Dobutamine Dose mcg/Min (HIGH)<br><i>Please record the highest in the last 24 hr</i>     | text                                                                                                                                                                                                                                                                                                                                                                                                                                                                                                                                                                                                     |   |                           |          |   |                           |            |   |                           |                |   |                           |             |   |                           |               |   |                           |           |   |                           |             |
| 1016 | dobuta_dose32_d5c3bal<br>Show the field ONLY if:<br>[name_vassopressors3bal(2)] = '1'     | Dobutamine Dose mcg/Kg/Min                                                               | calc<br>Calculation: [dobuta_dose3bal]/[weight]                                                                                                                                                                                                                                                                                                                                                                                                                                                                                                                                                          |   |                           |          |   |                           |            |   |                           |                |   |                           |             |   |                           |               |   |                           |           |   |                           |             |
| 1017 | dobuta_dose3lowbal<br>Show the field ONLY if:<br>[name_vassopressors3bal(2)] = '1'        | Dobutamine Dose mcg/Min (LOW)<br><i>Please record the lowest in the last 24 hr</i>       | text                                                                                                                                                                                                                                                                                                                                                                                                                                                                                                                                                                                                     |   |                           |          |   |                           |            |   |                           |                |   |                           |             |   |                           |               |   |                           |           |   |                           |             |
| 1018 | dobuta_dose32_d5c2_3a4bal<br>Show the field ONLY if:<br>[name_vassopressors3bal(2)] = '1' | Dobutamine Dose mcg/Kg/Min (LOW)                                                         | calc<br>Calculation: [dobuta_dose3lowbal]/[weight]                                                                                                                                                                                                                                                                                                                                                                                                                                                                                                                                                       |   |                           |          |   |                           |            |   |                           |                |   |                           |             |   |                           |               |   |                           |           |   |                           |             |
| 1019 | norepi_dose3bal<br>Show the field ONLY if:<br>[name_vassopressors3bal(3)] = '1'           | Norepinephrine Dose mcg/Min (HIGH)<br><i>Please record the highest in the last 24 hr</i> | text                                                                                                                                                                                                                                                                                                                                                                                                                                                                                                                                                                                                     |   |                           |          |   |                           |            |   |                           |                |   |                           |             |   |                           |               |   |                           |           |   |                           |             |
| 1020 | norepi_dose32_3d3bal<br>Show the field ONLY if:<br>[name_vassopressors3bal(3)] = '1'      | Norepinephrine Dose mcg/Kg/Min                                                           | calc<br>Calculation: [norepi_dose3bal]/[weight]                                                                                                                                                                                                                                                                                                                                                                                                                                                                                                                                                          |   |                           |          |   |                           |            |   |                           |                |   |                           |             |   |                           |               |   |                           |           |   |                           |             |
| 1021 | norepi_dose3lowbal<br>Show the field ONLY if:<br>[name_vassopressors3bal(3)] = '1'        | Norepinephrine Dose mcg/Min (LOW)<br><i>Please record the lowest in the last 24 hr</i>   | text                                                                                                                                                                                                                                                                                                                                                                                                                                                                                                                                                                                                     |   |                           |          |   |                           |            |   |                           |                |   |                           |             |   |                           |               |   |                           |           |   |                           |             |
| 1022 | norepi_dose32_3d32_82ebal<br>Show the field ONLY if:<br>[name_vassopressors3bal(3)] = '1' | Norepinephrine Dose mcg/Kg/Min                                                           | calc<br>Calculation: [norepi_dose3lowbal]/[weight]                                                                                                                                                                                                                                                                                                                                                                                                                                                                                                                                                       |   |                           |          |   |                           |            |   |                           |                |   |                           |             |   |                           |               |   |                           |           |   |                           |             |
| 1023 | epi_dose3bal<br>Show the field ONLY if:<br>[name_vassopressors3bal(4)] = '1'              | Epinephrine Dose mcg/Min (HIGH)<br><i>Please record the highest in the last 24 hr</i>    | text                                                                                                                                                                                                                                                                                                                                                                                                                                                                                                                                                                                                     |   |                           |          |   |                           |            |   |                           |                |   |                           |             |   |                           |               |   |                           |           |   |                           |             |
| 1024 | epi_dose32_929bal<br>Show the field ONLY if:<br>[name_vassopressors3bal(4)] = '1'         | Epinephrine Dose mcg/Kg/Min (HIGH)                                                       | calc<br>Calculation: [epi_dose3bal]/[weight]                                                                                                                                                                                                                                                                                                                                                                                                                                                                                                                                                             |   |                           |          |   |                           |            |   |                           |                |   |                           |             |   |                           |               |   |                           |           |   |                           |             |
| 1025 | epi_dose3lowbal<br>Show the field ONLY if:<br>[name_vassopressors3bal(4)] = '1'           | Epinephrine Dose mcg/Min (LOW)<br><i>Please record the lowest in the last 24 hr</i>      | text                                                                                                                                                                                                                                                                                                                                                                                                                                                                                                                                                                                                     |   |                           |          |   |                           |            |   |                           |                |   |                           |             |   |                           |               |   |                           |           |   |                           |             |
| 1026 | epi_dose32_9292_4bcbal<br>Show the field ONLY if:<br>[name_vassopressors3bal(4)] = '1'    | Epinephrine Dose mcg/Kg/Min (LOW)                                                        | calc<br>Calculation: [epi_dose3lowbal]/[weight]                                                                                                                                                                                                                                                                                                                                                                                                                                                                                                                                                          |   |                           |          |   |                           |            |   |                           |                |   |                           |             |   |                           |               |   |                           |           |   |                           |             |
| 1027 | phenylephrine_dose3bal<br>Show the field ONLY if:<br>[name_vassopressors3bal(5)] = '1'    | Phenylephrine Dose mcg/Min (HIGH)<br><i>Please record the highest in the last 24 hr</i>  | text                                                                                                                                                                                                                                                                                                                                                                                                                                                                                                                                                                                                     |   |                           |          |   |                           |            |   |                           |                |   |                           |             |   |                           |               |   |                           |           |   |                           |             |

|      |                                                                                                                            |                                                                                       |                                                                                                                                                                         |   |                  |   |                |   |             |
|------|----------------------------------------------------------------------------------------------------------------------------|---------------------------------------------------------------------------------------|-------------------------------------------------------------------------------------------------------------------------------------------------------------------------|---|------------------|---|----------------|---|-------------|
| 1028 | phenylephrine_dose32_23ebal<br>Show the field ONLY if:<br>[name_vassopressors3bal(5)] = '1'                                | Phenylephrine Dose mcg/Kg/Min (HIGH)                                                  | calc<br>Calculation: [phenylephrine_dose3bal]/[weight]                                                                                                                  |   |                  |   |                |   |             |
| 1029 | phenylephrine_dose3lowbal<br>Show the field ONLY if:<br>[name_vassopressors3bal(5)] = '1'                                  | Phenylephrine Dose mcg/Min (LOW)<br><i>Please record the lowest in the last 24 hr</i> | text                                                                                                                                                                    |   |                  |   |                |   |             |
| 1030 | phenylephrine_dose32_2_652bal<br>Show the field ONLY if:<br>[name_vassopressors3bal(5)] = '1'                              | Phenylephrine Dose mcg/Kg/Min (LOW)                                                   | calc<br>Calculation: [phenylephrine_dose3lowbal]/[weight]                                                                                                               |   |                  |   |                |   |             |
| 1031 | milrinone_dose3bal<br>Show the field ONLY if:<br>[name_vassopressors3bal(6)] = '1'                                         | Milrinone dose Mcg/min (HIGH)<br><i>Please record the highest in the last 24 hr</i>   | text                                                                                                                                                                    |   |                  |   |                |   |             |
| 1032 | milrinone_dose32_1bbbal<br>Show the field ONLY if:<br>[name_vassopressors3bal(6)] = '1'                                    | Milrinone dose Mcg/Kg/min (HIGH)                                                      | calc<br>Calculation: [milrinone_dose3bal]/[weight]                                                                                                                      |   |                  |   |                |   |             |
| 1033 | milrinone_dose3lowbal<br>Show the field ONLY if:<br>[name_vassopressors3bal(6)] = '1'                                      | Milrinone dose Mcg/min (LOW)<br><i>Please record the lowest in the last 24 hr</i>     | text                                                                                                                                                                    |   |                  |   |                |   |             |
| 1034 | milrinone_dose32_1bb2_a0dbal<br>Show the field ONLY if:<br>[name_vassopressors3bal(6)] = '1'                               | Milrinone dose Mcg/Kg/min (LOW)                                                       | calc<br>Calculation: [milrinone_dose3lowbal]/[weight]                                                                                                                   |   |                  |   |                |   |             |
| 1035 | vasopressin_dose3bal<br>Show the field ONLY if:<br>[name_vassopressors3bal(7)] = '1'                                       | Vasopressin dose U/min (HIGH)<br><i>Please record the highest in the last 24 hr</i>   | text                                                                                                                                                                    |   |                  |   |                |   |             |
| 1036 | vasopressin_dose32_2e2bal<br>Show the field ONLY if:<br>[name_vassopressors3bal(7)] = '1'                                  | Vasopressin dose U/min (LOW)<br><i>Please record the lowest in the last 24 hr</i>     | text                                                                                                                                                                    |   |                  |   |                |   |             |
| 1037 | invasive_ventilation3bal                                                                                                   | Section Header: <i>Ventilation &amp; supplemental oxygen</i><br>Invasive ventilation? | dropdown<br><table border="1"> <tr><td>1</td><td>Previous</td></tr> <tr><td>0</td><td>No</td></tr> <tr><td>2</td><td>Active</td></tr> </table>                          | 1 | Previous         | 0 | No             | 2 | Active      |
| 1    | Previous                                                                                                                   |                                                                                       |                                                                                                                                                                         |   |                  |   |                |   |             |
| 0    | No                                                                                                                         |                                                                                       |                                                                                                                                                                         |   |                  |   |                |   |             |
| 2    | Active                                                                                                                     |                                                                                       |                                                                                                                                                                         |   |                  |   |                |   |             |
| 1038 | ventilation_mode3bal<br>Show the field ONLY if:<br>[invasive_ventilation3bal] = '1' or<br>[invasive_ventilation3bal] = '2' | Ventilation mode                                                                      | dropdown<br><table border="1"> <tr><td>1</td><td>Pressure control</td></tr> <tr><td>2</td><td>Volume control</td></tr> <tr><td>3</td><td>Spontaneous</td></tr> </table> | 1 | Pressure control | 2 | Volume control | 3 | Spontaneous |
| 1    | Pressure control                                                                                                           |                                                                                       |                                                                                                                                                                         |   |                  |   |                |   |             |
| 2    | Volume control                                                                                                             |                                                                                       |                                                                                                                                                                         |   |                  |   |                |   |             |
| 3    | Spontaneous                                                                                                                |                                                                                       |                                                                                                                                                                         |   |                  |   |                |   |             |
| 1039 | peep_pc3bal<br>Show the field ONLY if:<br>[ventilation_mode3bal] = '1'                                                     | PEEP                                                                                  | text                                                                                                                                                                    |   |                  |   |                |   |             |
| 1040 | pip3bal<br>Show the field ONLY if:<br>[ventilation_mode3bal] = '1'                                                         | PIP (Inspiratory pressure)                                                            | text                                                                                                                                                                    |   |                  |   |                |   |             |
| 1041 | itime3bal<br>Show the field ONLY if:<br>[ventilation_mode3bal] = '1'                                                       | Inspiratory Time (itime) seconds                                                      | text                                                                                                                                                                    |   |                  |   |                |   |             |
| 1042 | tidal_vol_pressure3bal<br>Show the field ONLY if:<br>[ventilation_mode3bal] = '1'                                          | Tidal Volume High<br><i>Please record the highest in the last 24 hr</i>               | text                                                                                                                                                                    |   |                  |   |                |   |             |
| 1043 | tidal_vol_pressure32_415bal<br>Show the field ONLY if:<br>[ventilation_mode3bal] = '1'                                     | Tidal Volume Low<br><i>Please record the lowest in the last 24 hr</i>                 | text                                                                                                                                                                    |   |                  |   |                |   |             |
| 1044 | resp_rate_pressure3bal<br>Show the field ONLY if:<br>[ventilation_mode3bal] = '1'                                          | Respiratory Rate                                                                      | text                                                                                                                                                                    |   |                  |   |                |   |             |
| 1045 | minute_vent_high3bal<br>Show the field ONLY if:<br>[ventilation_mode3bal] = '1'                                            | Minute Ventilation (HIGH)                                                             | text                                                                                                                                                                    |   |                  |   |                |   |             |
| 1046 | minute_vent_low3bal<br>Show the field ONLY if:<br>[ventilation_mode3bal] = '1'                                             | Minute Ventilation (LOW)                                                              | text                                                                                                                                                                    |   |                  |   |                |   |             |

|      |                                                                                          |                                                                                 |      |
|------|------------------------------------------------------------------------------------------|---------------------------------------------------------------------------------|------|
| 1047 | pplateau_3bal<br>Show the field ONLY if:<br>[ventilation_mode3bal] = '1'                 | P plateau                                                                       | text |
| 1048 | compliance_3bal<br>Show the field ONLY if:<br>[ventilation_mode3bal] = '1'               | Compliance                                                                      | text |
| 1049 | peep_vc3bal<br>Show the field ONLY if:<br>[ventilation_mode3bal] = '2'                   | PEEP                                                                            | text |
| 1050 | pip_volume3bal<br>Show the field ONLY if:<br>[ventilation_mode3bal] = '2'                | Peak inspiratory pressure (PIP)                                                 | text |
| 1051 | flow_rate3bal<br>Show the field ONLY if:<br>[ventilation_mode3bal] = '2'                 | Flow rate                                                                       | text |
| 1052 | tidal_volume_volume3bal<br>Show the field ONLY if:<br>[ventilation_mode3bal] = '2'       | Tidal volume                                                                    | text |
| 1053 | rr_volume_control3bal<br>Show the field ONLY if:<br>[ventilation_mode3bal] = '2'         | Respiratory Rate                                                                | text |
| 1054 | minute_vent_volume3bal<br>Show the field ONLY if:<br>[ventilation_mode3bal] = '2'        | Minute ventilation (HIGH)                                                       | text |
| 1055 | minute_vent_volumelow3bal<br>Show the field ONLY if:<br>[ventilation_mode3bal] = '2'     | Minute ventilation (LOW)                                                        | text |
| 1056 | p_plateau3bal<br>Show the field ONLY if:<br>[ventilation_mode3bal] = '2'                 | P plateau                                                                       | text |
| 1057 | compliance_vc3bal<br>Show the field ONLY if:<br>[ventilation_mode3bal] = '2'             | Compliance                                                                      | text |
| 1058 | peep_spontaneous3bal<br>Show the field ONLY if:<br>[ventilation_mode3bal] = '3'          | PEEP                                                                            | text |
| 1059 | pressure_above_peep_spont3bal<br>Show the field ONLY if:<br>[ventilation_mode3bal] = '3' | Pressure above PEEP                                                             | text |
| 1060 | tidal_vol_spontaneous3bal<br>Show the field ONLY if:<br>[ventilation_mode3bal] = '3'     | Exhaled tidal volume High<br><i>Please record the highest in the last 24 hr</i> | text |
| 1061 | tidal_vol_spontaneous2_3dabal<br>Show the field ONLY if:<br>[ventilation_mode3bal] = '3' | Exhaled tidal volume Low<br><i>Please record the lowest in the last 24 hr</i>   | text |
| 1062 | respiratory_rate_spont3bal<br>Show the field ONLY if:<br>[ventilation_mode3bal] = '3'    | Respiratory Rate (HIGH)                                                         | text |
| 1063 | respiratory_rate_sponlow3bal<br>Show the field ONLY if:<br>[ventilation_mode3bal] = '3'  | Respiratory Rate (LOW)                                                          | text |
| 1064 | minute_vebt_spont3bal<br>Show the field ONLY if:<br>[ventilation_mode3bal] = '3'         | Minute ventilation High<br><i>Please record the highest in the last 24 hr</i>   | text |
| 1065 | minute_vebt_spont32_eadbal<br>Show the field ONLY if:<br>[ventilation_mode3bal] = '3'    | Minute ventilation low<br><i>Please record the lowest in the last 24 hr</i>     | text |

|      |                                                                                                                                                   |                                     |                                                                                                                                                                                                                                           |   |                               |   |                                                     |   |                      |   |           |   |                 |
|------|---------------------------------------------------------------------------------------------------------------------------------------------------|-------------------------------------|-------------------------------------------------------------------------------------------------------------------------------------------------------------------------------------------------------------------------------------------|---|-------------------------------|---|-----------------------------------------------------|---|----------------------|---|-----------|---|-----------------|
| 1066 | non_invasive_vent3bal<br>Show the field ONLY if:<br>[invasive_ventilation3bal] = '0'                                                              | Non Invasive Ventilation            | dropdown<br><table border="1"> <tr><td>1</td><td>CPAP</td></tr> <tr><td>2</td><td>BPAP</td></tr> <tr><td>3</td><td>NVP</td></tr> <tr><td>0</td><td>No</td></tr> </table>                                                                  | 1 | CPAP                          | 2 | BPAP                                                | 3 | NVP                  | 0 | No        |   |                 |
| 1    | CPAP                                                                                                                                              |                                     |                                                                                                                                                                                                                                           |   |                               |   |                                                     |   |                      |   |           |   |                 |
| 2    | BPAP                                                                                                                                              |                                     |                                                                                                                                                                                                                                           |   |                               |   |                                                     |   |                      |   |           |   |                 |
| 3    | NVP                                                                                                                                               |                                     |                                                                                                                                                                                                                                           |   |                               |   |                                                     |   |                      |   |           |   |                 |
| 0    | No                                                                                                                                                |                                     |                                                                                                                                                                                                                                           |   |                               |   |                                                     |   |                      |   |           |   |                 |
| 1067 | inspiratory_pressure3bal<br>Show the field ONLY if:<br>[non_invasive_vent3bal] = '1' and<br>[non_invasive_vent3bal] = '2'                         | Inspiratory Pressure                | text                                                                                                                                                                                                                                      |   |                               |   |                                                     |   |                      |   |           |   |                 |
| 1068 | peep_niv3bal<br>Show the field ONLY if:<br>[non_invasive_vent3bal] = '1' and<br>[non_invasive_vent3bal] = '2'                                     | PEEP                                | text                                                                                                                                                                                                                                      |   |                               |   |                                                     |   |                      |   |           |   |                 |
| 1069 | fio2_niv_3bal<br>Show the field ONLY if:<br>[non_invasive_vent3bal] = '1' and<br>[non_invasive_vent3bal] = '2'                                    | FiO2                                | text                                                                                                                                                                                                                                      |   |                               |   |                                                     |   |                      |   |           |   |                 |
| 1070 | supplemental3bal<br>Show the field ONLY if:<br>[invasive_ventilation3bal] = '0' or<br>[non_invasive_vent3bal] = '0'                               | Supplemental O2?                    | dropdown<br><table border="1"> <tr><td>1</td><td>Nasal Canula</td></tr> <tr><td>2</td><td>Ventury</td></tr> <tr><td>3</td><td>Non-rebreathing mask</td></tr> <tr><td>4</td><td>Optiflow</td></tr> <tr><td>0</td><td>No</td></tr> </table> | 1 | Nasal Canula                  | 2 | Ventury                                             | 3 | Non-rebreathing mask | 4 | Optiflow  | 0 | No              |
| 1    | Nasal Canula                                                                                                                                      |                                     |                                                                                                                                                                                                                                           |   |                               |   |                                                     |   |                      |   |           |   |                 |
| 2    | Ventury                                                                                                                                           |                                     |                                                                                                                                                                                                                                           |   |                               |   |                                                     |   |                      |   |           |   |                 |
| 3    | Non-rebreathing mask                                                                                                                              |                                     |                                                                                                                                                                                                                                           |   |                               |   |                                                     |   |                      |   |           |   |                 |
| 4    | Optiflow                                                                                                                                          |                                     |                                                                                                                                                                                                                                           |   |                               |   |                                                     |   |                      |   |           |   |                 |
| 0    | No                                                                                                                                                |                                     |                                                                                                                                                                                                                                           |   |                               |   |                                                     |   |                      |   |           |   |                 |
| 1071 | liter3bal<br>Show the field ONLY if:<br>[supplemental3bal] = '1' and [supplemental3bal] = '2' and [supplemental3bal] = '3'                        | Liters/min                          | text                                                                                                                                                                                                                                      |   |                               |   |                                                     |   |                      |   |           |   |                 |
| 1072 | setfio23bal<br>Show the field ONLY if:<br>[supplemental3bal] = '4'                                                                                | Set FiO2                            | text                                                                                                                                                                                                                                      |   |                               |   |                                                     |   |                      |   |           |   |                 |
| 1073 | calculated_fio23bal<br>Show the field ONLY if:<br>[supplemental3bal] = '4'                                                                        | Calculated FiO2                     | text                                                                                                                                                                                                                                      |   |                               |   |                                                     |   |                      |   |           |   |                 |
| 1074 | fio23bal                                                                                                                                          | FiO2 %                              | text                                                                                                                                                                                                                                      |   |                               |   |                                                     |   |                      |   |           |   |                 |
| 1075 | pafi13bal                                                                                                                                         | PaO2/FiO2                           | calc<br>Calculation: [po23bal]/[fio23bal]                                                                                                                                                                                                 |   |                               |   |                                                     |   |                      |   |           |   |                 |
| 1076 | aado2bal                                                                                                                                          | AaDO2                               | calc<br>Calculation: (([fio23bal]*713)-[co23bal]-[po23bal])                                                                                                                                                                               |   |                               |   |                                                     |   |                      |   |           |   |                 |
| 1077 | peep3bal                                                                                                                                          | PEEP (CmH2O)                        | text                                                                                                                                                                                                                                      |   |                               |   |                                                     |   |                      |   |           |   |                 |
| 1078 | glasgow3bal                                                                                                                                       | Glasgow                             | dropdown<br><table border="1"> <tr><td>1</td><td>NA - sedation the entire day.</td></tr> <tr><td>2</td><td>At some point not under the influence of medication</td></tr> <tr><td>3</td><td>Yes</td></tr> </table>                         | 1 | NA - sedation the entire day. | 2 | At some point not under the influence of medication | 3 | Yes                  |   |           |   |                 |
| 1    | NA - sedation the entire day.                                                                                                                     |                                     |                                                                                                                                                                                                                                           |   |                               |   |                                                     |   |                      |   |           |   |                 |
| 2    | At some point not under the influence of medication                                                                                               |                                     |                                                                                                                                                                                                                                           |   |                               |   |                                                     |   |                      |   |           |   |                 |
| 3    | Yes                                                                                                                                               |                                     |                                                                                                                                                                                                                                           |   |                               |   |                                                     |   |                      |   |           |   |                 |
| 1079 | glasgow_value_3bal                                                                                                                                | GCS value                           | text                                                                                                                                                                                                                                      |   |                               |   |                                                     |   |                      |   |           |   |                 |
| 1080 | trasnfusion3bal                                                                                                                                   | Transfusion during the past 2 days? | dropdown<br><table border="1"> <tr><td>0</td><td>No</td></tr> <tr><td>1</td><td>Plasma</td></tr> <tr><td>2</td><td>RBC</td></tr> <tr><td>3</td><td>Platelets</td></tr> <tr><td>4</td><td>Cryoprecipitate</td></tr> </table>               | 0 | No                            | 1 | Plasma                                              | 2 | RBC                  | 3 | Platelets | 4 | Cryoprecipitate |
| 0    | No                                                                                                                                                |                                     |                                                                                                                                                                                                                                           |   |                               |   |                                                     |   |                      |   |           |   |                 |
| 1    | Plasma                                                                                                                                            |                                     |                                                                                                                                                                                                                                           |   |                               |   |                                                     |   |                      |   |           |   |                 |
| 2    | RBC                                                                                                                                               |                                     |                                                                                                                                                                                                                                           |   |                               |   |                                                     |   |                      |   |           |   |                 |
| 3    | Platelets                                                                                                                                         |                                     |                                                                                                                                                                                                                                           |   |                               |   |                                                     |   |                      |   |           |   |                 |
| 4    | Cryoprecipitate                                                                                                                                   |                                     |                                                                                                                                                                                                                                           |   |                               |   |                                                     |   |                      |   |           |   |                 |
| 1081 | total_3bal<br>Show the field ONLY if:<br>[trasnfusion3bal] = '1' or [trasnfusion3bal] = '2' or [trasnfusion3bal] = '3' or [trasnfusion3bal] = '4' | Total number of transfusions given  | text                                                                                                                                                                                                                                      |   |                               |   |                                                     |   |                      |   |           |   |                 |

|      |                                                                                                  |                                                                                                                                                            |                                                                           |
|------|--------------------------------------------------------------------------------------------------|------------------------------------------------------------------------------------------------------------------------------------------------------------|---------------------------------------------------------------------------|
| 1082 | types_3bal<br>Show the field ONLY if: [total_3bal] > 1                                           | Different types of transfusion?                                                                                                                            | dropdown<br>1 Plasma<br>2 RBC<br>3 Platelets<br>4 Cryoprecipitate<br>0 No |
| 1083 | dnr_3bal                                                                                         | DNR/DNI?                                                                                                                                                   | dropdown<br>1 DNR<br>2 DNI/DNR<br>3 NO                                    |
| 1084 | staff_formbal                                                                                    | Please upload the scanned staff form                                                                                                                       | file                                                                      |
| 1085 | timing_dnr_3bal                                                                                  | DNR timing                                                                                                                                                 | dropdown<br>1 Early<br>2 Late                                             |
| 1086 | afterardsyn                                                                                      | Section Header: 28 day outcomes after bronchoscopy<br>Did the patient develop ARDS after bronchoscopy<br><i>Within 28 days. If Yes, complete ARDS form</i> | yesno<br>1 Yes<br>0 No                                                    |
| 1087 | aftericutransfer<br>Show the field ONLY if: [icubeforebal] = '0'                                 | Was the patient transferred to the ICU after bronchoscopy?<br><i>Within 28 days</i>                                                                        | yesno<br>1 Yes<br>0 No                                                    |
| 1088 | aftertransferdate<br>Show the field ONLY if: [aftericutransfer] = '1'                            | Date of ICU transfer after bronchoscopy<br><i>Within 28 days</i>                                                                                           | text (date_mdy)                                                           |
| 1089 | afterintubation<br>Show the field ONLY if: [beforeintubation] = '0'                              | Was the patient intubated after bronchoscopy?<br><i>Within 28 days</i>                                                                                     | yesno<br>1 Yes<br>0 No                                                    |
| 1090 | afterintubationdate<br>Show the field ONLY if: [aftericutransfer] = '1'                          | Date of intubation after bronchoscopy<br><i>Within 28 days</i>                                                                                             | text (date_mdy)                                                           |
| 1091 | afterextubationyn<br>Show the field ONLY if: [beforeintubation] = '1' or [afterintubation] = '1' | Was the patient extubated after bronchoscopy?<br><i>Within 28 days</i>                                                                                     | yesno<br>1 Yes<br>0 No                                                    |
| 1092 | afterextubationdate<br>Show the field ONLY if: [aftericutransfer] = '1'                          | Date of extubation after bronchoscopy<br><i>Within 28 days</i>                                                                                             | text (date_mdy)                                                           |
| 1093 | aftertrachyn<br>Show the field ONLY if: [beforeintubation] = '1' or [afterintubation] = '1'      | Did the patient receive a tracheostomy after bronchoscopy<br><i>Within 28 days</i>                                                                         | yesno<br>1 Yes<br>0 No                                                    |
| 1094 | aftertrachdate<br>Show the field ONLY if: [aftertrachyn] = '1'                                   | Date of tracheostomy after bronchoscopy<br><i>Within 28 days</i>                                                                                           | text (date_mdy)                                                           |
| 1095 | aftermortalityyn                                                                                 | Did the patient die after bronchoscopy<br><i>Within 28 days</i>                                                                                            | yesno<br>1 Yes<br>0 No                                                    |
| 1096 | dateofdeath<br>Show the field ONLY if: [aftermortalityyn] = '1'                                  | Date of death                                                                                                                                              | text (date_mdy)                                                           |
| 1097 | deatho2yn<br>Show the field ONLY if: [aftermortalityyn] = '1'                                    | Was the patient on supplemental oxygen at time of death                                                                                                    | yesno<br>1 Yes<br>0 No                                                    |



|                                              |                                                                                            |                                                                                                                                                                                                                   |                                                                                              |
|----------------------------------------------|--------------------------------------------------------------------------------------------|-------------------------------------------------------------------------------------------------------------------------------------------------------------------------------------------------------------------|----------------------------------------------------------------------------------------------|
| 1098                                         | deathfio2<br>Show the field ONLY if:<br>[deatho2yn] = '1'                                  | Approximate FIO2 at time of death                                                                                                                                                                                 | dropdown<br>1 < 35%<br>2 35-50%<br>3 51-75%<br>4 76-99%<br>5 100%                            |
| 1099                                         | deathardsyn<br>Show the field ONLY if:<br>[aftermortalityyn] = '1'                         | Was the patient in ARDS at time of death                                                                                                                                                                          | yesno<br>1 Yes<br>0 No                                                                       |
| 1100                                         | dischargeyn<br>Show the field ONLY if:<br>[aftermortalityyn] = '1'                         | Was the patient discharged within 28 days of bronchoscopy?<br><i>Within 28 days</i>                                                                                                                               | yesno<br>1 Yes<br>0 No                                                                       |
| 1101                                         | hrv_monitored_3_datbal                                                                     | Section Header: <i>Heart Rate Variability Monitored?</i><br>Hear Rate Varibility monitored?                                                                                                                       | yesno<br>1 Yes<br>0 No                                                                       |
| 1102                                         | hrv_a_3_daybal<br>Show the field ONLY if:<br>[hrv_monitored_3_datbal] = '1'                | HRV-a                                                                                                                                                                                                             | text                                                                                         |
| 1103                                         | hrv_a_3_day2_bdcbal<br>Show the field ONLY if:<br>[hrv_monitored_3_datbal] = '1'           | HRV-b                                                                                                                                                                                                             | text                                                                                         |
| 1104                                         | hrv_a_3_day2_bdc2_9e9bal<br>Show the field ONLY if:<br>[hrv_monitored_3_datbal] = '1'      | HRV-c                                                                                                                                                                                                             | text                                                                                         |
| 1105                                         | hrv_a_3_day2_bdc2_9e92_398bal<br>Show the field ONLY if:<br>[hrv_monitored_3_datbal] = '1' | HRV-d                                                                                                                                                                                                             | text                                                                                         |
| 1106                                         | bal_evaluation_complete                                                                    | Section Header: <i>Form Status</i><br>Complete?                                                                                                                                                                   | dropdown<br>0 Incomplete<br>1 Unverified<br>2 Complete                                       |
| Instrument: <b>Ards At Bal</b> (ards_at_bal) |                                                                                            |                                                                                                                                                                                                                   |                                                                                              |
| 1107                                         | ards_suspicionardsbal                                                                      | Section Header: <i>Does patient have ARDS at the time of BAL</i><br>Patient with suspicion of ARDS?                                                                                                               | dropdown<br>1 Yes<br>0 No                                                                    |
| 1108                                         | timingardsbal<br>Show the field ONLY if:<br>[ards_suspicionardsbal] = '1'                  | Timing: Within 1 week of a known clinical insult or new/worsening respiratory symptoms                                                                                                                            | dropdown<br>1 Yes<br>0 No                                                                    |
| 1109                                         | ards_dateardsbal                                                                           | Date of onset                                                                                                                                                                                                     | text (date_mdy)                                                                              |
| 1110                                         | imagingardsbal<br>Show the field ONLY if:<br>[ards_suspicionardsbal] = '1'                 | Chest imaging (X ray or CT) with bilateral opacities<br><i>Not fully explained by effusions, lobar/lung collapse, or nodules.</i>                                                                                 | dropdown<br>1 Yes<br>0 No                                                                    |
| 1111                                         | edema_originardsbal<br>Show the field ONLY if:<br>[ards_suspicionardsbal] = '1'            | Origin of edema: Respiratory failure not fully explained by cardiac failure or fluid overload<br><i>Need objective assessment (e.g., echocardiography) to exclude hydrostatic edema if no risk factor present</i> | dropdown<br>1 Yes<br>0 No                                                                    |
| 1112                                         | fio2_ardsardsbal<br>Show the field ONLY if:<br>[ards_suspicionardsbal] = '1'               | Pa/FIO2                                                                                                                                                                                                           | text                                                                                         |
| 1113                                         | severity_ardsardsbal<br>Show the field ONLY if:<br>[ards_suspicionardsbal] = '1'           | Severity of ARDS<br><i>All of them with PEEP or CPAP &gt; or = 5 cmH2O</i>                                                                                                                                        | dropdown<br>1 Mild (FIO2 300-201)<br>2 Moderate (FIO2 200-101)<br>3 Severe (FIO2 < or = 100) |
| 1114                                         | ph_postintubardsbal                                                                        | Section Header: <i>ABG Post-Intubation</i><br>Ph                                                                                                                                                                  | text                                                                                         |
| 1115                                         | po2_potsintubardsbal                                                                       | Po2                                                                                                                                                                                                               | text                                                                                         |

|      |                                                                                 |                                                                     |                                                    |
|------|---------------------------------------------------------------------------------|---------------------------------------------------------------------|----------------------------------------------------|
| 1116 | pco2_postintubardsbal                                                           | PCo2                                                                | text                                               |
| 1117 | bicarbonate_postintubardsbal                                                    | Bicarbonate                                                         | text                                               |
| 1118 | fio2_post_intubardsbal                                                          | Fio2                                                                | text                                               |
| 1119 | pronationardsbal<br>Show the field ONLY if:<br>[ards_suspicionardsbal] = '1'    | Section Header: <i>Pronation</i><br>Was the patient pronated?       | dropdown<br>1 Yes<br>0 No                          |
| 1120 | date_pronatardsbal<br>Show the field ONLY if:<br>[pronationardsbal] = '1'       | Date of pronation                                                   | text (date_mdy)                                    |
| 1121 | abg_pronatardsbal                                                               | ABG Post-pronation                                                  | dropdown<br>1 Yes<br>0 No                          |
| 1122 | ph_pronatardsbal<br>Show the field ONLY if:<br>[abg_pronatardsbal] = '1'        | Ph                                                                  | text                                               |
| 1123 | po2_pronatardsbal<br>Show the field ONLY if:<br>[abg_pronatardsbal] = '1'       | PO2                                                                 | text                                               |
| 1124 | pco2_pronatardsbal<br>Show the field ONLY if:<br>[abg_pronatardsbal] = '1'      | PCo2                                                                | text                                               |
| 1125 | so2_pronatardsbal<br>Show the field ONLY if:<br>[abg_pronatardsbal] = '1'       | SO2                                                                 | text                                               |
| 1126 | bicarb_pronatardsbal<br>Show the field ONLY if:<br>[abg_pronatardsbal] = '1'    | Bicarbonate                                                         | text                                               |
| 1127 | horus_pronatardsbal<br>Show the field ONLY if:<br>[pronationardsbal] = '1'      | Hours of pronation                                                  | text                                               |
| 1128 | mode_pronatardsbal<br>Show the field ONLY if:<br>[pronationardsbal] = '1'       | Section Header: <i>Ventilator settings during pronation</i><br>Mode | dropdown<br>1 Pressure Control<br>2 Volume Control |
| 1129 | rr_pronation_highardsbal<br>Show the field ONLY if:<br>[pronationardsbal] = '1' | Respiratory Rate During pronation (High)                            | text                                               |
| 1130 | rr_ponat_lowardsbal<br>Show the field ONLY if:<br>[pronationardsbal] = '1'      | Respiratory Rate during pronation (LOW)                             | text                                               |
| 1131 | tidal_vol_pronatardsbal<br>Show the field ONLY if:<br>[pronationardsbal] = '1'  | Tidal Volume                                                        | text                                               |
| 1132 | fio2_pronatardsbal<br>Show the field ONLY if:<br>[pronationardsbal] = '1'       | FiO2                                                                | text                                               |
| 1133 | peep_pronatardsbal<br>Show the field ONLY if:<br>[pronationardsbal] = '1'       | PEEP                                                                | text                                               |
| 1134 | p_plateu_pronatardsbal<br>Show the field ONLY if:<br>[pronationardsbal] = '1'   | P plateu                                                            | text                                               |
| 1135 | compliance_pronatardsbal<br>Show the field ONLY if:<br>[pronationardsbal] = '1' | Compliance                                                          | text                                               |
| 1136 | flow_pronatardsbal<br>Show the field ONLY if:<br>[mode_pronatardsbal] = '2'     | Peak Inspiratory Flow                                               | text                                               |

|                                            |                                                                              |                                                                                                                        |                                                                                                                                                                                                        |
|--------------------------------------------|------------------------------------------------------------------------------|------------------------------------------------------------------------------------------------------------------------|--------------------------------------------------------------------------------------------------------------------------------------------------------------------------------------------------------|
| 1137                                       | pip_pronatardsbal<br>Show the field ONLY if:<br>[mode_pronatardsbal] = '2'   | PIP                                                                                                                    | text                                                                                                                                                                                                   |
| 1138                                       | neuromusc_blockardsbal                                                       | Section Header: <i>Neuromuscular blockade? Pulmonary vasodilation</i><br>Was the patient under neuromuscular blockade? | dropdown<br>1 Yes<br>0 No                                                                                                                                                                              |
| 1139                                       | vasodilatorsardsbal                                                          | Was the patient under pulmonary vasodilators?                                                                          | dropdown<br>1 Yes<br>0 No                                                                                                                                                                              |
| 1140                                       | vasodilatorardsbal<br>Show the field ONLY if:<br>[vasodilatorsardsbal] = '1' | Vasodilator name                                                                                                       | checkbox<br>1 vasodilatorardsbal__1 Nitric Oxide<br>2 vasodilatorardsbal__2 Epoprostenol<br>3 vasodilatorardsbal__3 Sildenafil<br>4 vasodilatorardsbal__4 Iloprost<br>5 vasodilatorardsbal__5 Bosentan |
| 1141                                       | ards_at_bal_complete                                                         | Section Header: <i>Form Status</i><br>Complete?                                                                        | dropdown<br>0 Incomplete<br>1 Unverified<br>2 Complete                                                                                                                                                 |
| Instrument: <b>Biomarkers</b> (biomarkers) |                                                                              |                                                                                                                        |                                                                                                                                                                                                        |
| 1142                                       | mtdna_day_0                                                                  | Section Header: <i>Plasma</i><br>mtDNA Day 0                                                                           | text                                                                                                                                                                                                   |
| 1143                                       | mtdna                                                                        | mtDNA Day 1                                                                                                            | text                                                                                                                                                                                                   |
| 1144                                       | mtdna_day_3                                                                  | mtDNA Day 3                                                                                                            | text                                                                                                                                                                                                   |
| 1145                                       | mtdna_day_7                                                                  | mtDNA Day 7                                                                                                            | text                                                                                                                                                                                                   |
| 1146                                       | rip3_day_0                                                                   | RIP 3 Day 0                                                                                                            | text                                                                                                                                                                                                   |
| 1147                                       | rip_3_day_1                                                                  | RIP 3 Day 1                                                                                                            | text                                                                                                                                                                                                   |
| 1148                                       | rip_3_day_3                                                                  | RIP 3 Day 3                                                                                                            | text                                                                                                                                                                                                   |
| 1149                                       | rip3_day_7                                                                   | RIP 3 day 7                                                                                                            | text                                                                                                                                                                                                   |
| 1150                                       | il18_day0                                                                    | IL-18 Day 0                                                                                                            | text                                                                                                                                                                                                   |
| 1151                                       | il_18_day_1                                                                  | IL-18 Day 1                                                                                                            | text                                                                                                                                                                                                   |
| 1152                                       | il18day3                                                                     | IL-18 Day 3                                                                                                            | text                                                                                                                                                                                                   |
| 1153                                       | il18_day_7                                                                   | IL-18 Day 7                                                                                                            | text                                                                                                                                                                                                   |
| 1154                                       | spd_da1                                                                      | SPD day 1                                                                                                              | text                                                                                                                                                                                                   |
| 1155                                       | mtdna_day_02_3ee                                                             | Section Header: <i>Urine</i><br>mtDNA Day 0                                                                            | text                                                                                                                                                                                                   |
| 1156                                       | mtdna2_c3a                                                                   | mtDNA Day 1                                                                                                            | text                                                                                                                                                                                                   |
| 1157                                       | mtdna_day_32_cfb                                                             | mtDNA Day 3                                                                                                            | text                                                                                                                                                                                                   |
| 1158                                       | mtdna_day_72_8a2                                                             | mtDNA Day 7                                                                                                            | text                                                                                                                                                                                                   |
| 1159                                       | rip3_day_02_370                                                              | RIP 3 Day 0                                                                                                            | text                                                                                                                                                                                                   |
| 1160                                       | rip_3_day_12_554                                                             | RIP 3 Day 1                                                                                                            | text                                                                                                                                                                                                   |
| 1161                                       | rip_3_day_32_d49                                                             | RIP 3 Day 3                                                                                                            | text                                                                                                                                                                                                   |
| 1162                                       | rip3_day_72_bbe                                                              | RIP 3 day 7                                                                                                            | text                                                                                                                                                                                                   |
| 1163                                       | il18_day02_c22                                                               | IL-18 Day 0                                                                                                            | text                                                                                                                                                                                                   |
| 1164                                       | il_18_day_12_b7c                                                             | IL-18 Day 1                                                                                                            | text                                                                                                                                                                                                   |
| 1165                                       | il18day32_b57                                                                | IL-18 Day 3                                                                                                            | text                                                                                                                                                                                                   |
| 1166                                       | il18_day_72_0a2                                                              | IL-18 Day 7                                                                                                            | text                                                                                                                                                                                                   |
| 1167                                       | mtdna_day_02_3ee2_9ae                                                        | Section Header: <i>BAL</i><br>mtDNA                                                                                    | text                                                                                                                                                                                                   |
| 1168                                       | rip3_day_02_3702_37a                                                         | RIP 3                                                                                                                  | text                                                                                                                                                                                                   |
| 1169                                       | il18_day02_c222_04f                                                          | IL-18                                                                                                                  | text                                                                                                                                                                                                   |
| 1170                                       | trail                                                                        | TRAIL                                                                                                                  | text                                                                                                                                                                                                   |

|                                                                      |                                                     |                                                     |                                                        |
|----------------------------------------------------------------------|-----------------------------------------------------|-----------------------------------------------------|--------------------------------------------------------|
| 1171                                                                 | biomarkers_complete                                 | Section Header: <i>Form Status</i><br>Complete?     | dropdown<br>0 Incomplete<br>1 Unverified<br>2 Complete |
| Instrument: <b>RDR variables (imported)</b> (rdr_variables_imported) |                                                     |                                                     |                                                        |
| 1172                                                                 | day1_sofa_pul_spo2_aligned                          | Day1 SOFA Pul SpO2 Aligned                          | text                                                   |
| 1173                                                                 | day1_sofa_renal                                     | Day1 SOFA Renal                                     | text                                                   |
| 1174                                                                 | day1_sofa_total                                     | Day1 SOFA Total                                     | text                                                   |
| 1175                                                                 | day1_sofa_liver                                     | Day1 SOFA Liver                                     | text                                                   |
| 1176                                                                 | day1_sofa_cns                                       | Day1 SOFA CNS                                       | text                                                   |
| 1177                                                                 | day1_sofa_pul_agg                                   | Day1 SOFA Pul Agg                                   | text                                                   |
| 1178                                                                 | day1_sofa_pul_pao2                                  | Day1 SOFA Pul PaO2                                  | text                                                   |
| 1179                                                                 | day1_sofa_cardio                                    | Day1 SOFA Cardio                                    | text                                                   |
| 1180                                                                 | day1_sofa_coag                                      | Day1 SOFA Coag                                      | text                                                   |
| 1181                                                                 | day1_sofa_pul_spo2                                  | Day1 SOFA Pul SpO2                                  | text                                                   |
| 1182                                                                 | day3_sofa_pul_spo2_aligned                          | Day3 SOFA Pul SpO2 Aligned                          | text                                                   |
| 1183                                                                 | day3_sofa_renal                                     | Day3 SOFA Renal                                     | text                                                   |
| 1184                                                                 | day3_sofa_total                                     | Day3 SOFA Total                                     | text                                                   |
| 1185                                                                 | day3_sofa_liver                                     | Day3 SOFA Liver                                     | text                                                   |
| 1186                                                                 | day3_sofa_cns                                       | Day3 SOFA CNS                                       | text                                                   |
| 1187                                                                 | day3_sofa_pul_agg                                   | Day3 SOFA Pul Agg                                   | text                                                   |
| 1188                                                                 | day3_sofa_pul_pao2                                  | Day3 SOFA Pul PaO2                                  | text                                                   |
| 1189                                                                 | day3_sofa_cardio                                    | Day3 SOFA Cardio                                    | text                                                   |
| 1190                                                                 | day3_sofa_coag                                      | Day3 SOFA Coag                                      | text                                                   |
| 1191                                                                 | day3_sofa_pul_spo2                                  | Day3 SOFA Pul SpO2                                  | text                                                   |
| 1192                                                                 | day7_sofa_pul_spo2_aligned                          | Day7 SOFA Pul SpO2 Aligned                          | text                                                   |
| 1193                                                                 | day7_sofa_renal                                     | Day7 SOFA Renal                                     | text                                                   |
| 1194                                                                 | day7_sofa_total                                     | Day7 SOFA Total                                     | text                                                   |
| 1195                                                                 | day7_sofa_liver                                     | Day7 SOFA Liver                                     | text                                                   |
| 1196                                                                 | day7_sofa_cns                                       | Day7 SOFA CNS                                       | text                                                   |
| 1197                                                                 | day7_sofa_pul_agg                                   | Day7 SOFA Pul Agg                                   | text                                                   |
| 1198                                                                 | day7_sofa_pul_pao2                                  | Day7 SOFA Pul PaO2                                  | text                                                   |
| 1199                                                                 | day7_sofa_cardio                                    | Day7 SOFA Cardio                                    | text                                                   |
| 1200                                                                 | day7_sofa_coag                                      | Day7 SOFA Coag                                      | text                                                   |
| 1201                                                                 | day7_sofa_pul_spo2                                  | Day7 SOFA Pul SpO2                                  | text                                                   |
| 1202                                                                 | duration_of_invasive_mechanical_ventilation_days    | Duration of Invasive Mechanical Ventilation Days    | text                                                   |
| 1203                                                                 | duration_of_noninvasive_mechanical_ventilation_days | Duration of Noninvasive Mechanical Ventilation Days | text                                                   |
| 1204                                                                 | duration_of_icu_admission_days                      | Duration of ICU Admission Days                      | text                                                   |
| 1205                                                                 | duration_of_vasopressor_usage_days                  | Duration of Vasopressor Usage Days                  | text                                                   |
| 1206                                                                 | mechanical_ventilation_free_days                    | Mechanical Ventilation Free Days                    | text                                                   |
| 1207                                                                 | icu_free_days                                       | ICU Free Days                                       | text                                                   |
| 1208                                                                 | duration_of_abx_usage_days                          | Duration of ABX Usage Days                          | text                                                   |
| 1209                                                                 | abx_usage_within_day_2_3                            | ABX Usage within day 2 -3                           | text                                                   |
| 1210                                                                 | abx_date_of_first_admin                             | ABX Date of First Admin                             | text                                                   |
| 1211                                                                 | abx_date_of_last_admin                              | ABX Date of Last Admin                              | text                                                   |
| 1212                                                                 | cardiovascular_organ_failure_free_days              | Cardiovascular Organ Failure Free Days              | text                                                   |
| 1213                                                                 | pulmonary_organ_failure_free_days                   | Pulmonary Organ Failure Free Days                   | text                                                   |
| 1214                                                                 | central_nervous_system_organ_failure_free_days      | Central Nervous System Organ Failure Free Days      | text                                                   |
| 1215                                                                 | coagulation_organ_failure_free_days                 | Coagulation Organ Failure Free Days                 | text                                                   |

|                                                                                                          |                                 |                                                    |                                                                                                                                                                     |   |            |   |            |   |          |
|----------------------------------------------------------------------------------------------------------|---------------------------------|----------------------------------------------------|---------------------------------------------------------------------------------------------------------------------------------------------------------------------|---|------------|---|------------|---|----------|
| 1216                                                                                                     | renal_organ_failure_free_days   | Renal Organ Failure Free Days                      | text                                                                                                                                                                |   |            |   |            |   |          |
| 1217                                                                                                     | hepatic_organ_failure_free_days | Hepatic Organ Failure Free Days                    | text                                                                                                                                                                |   |            |   |            |   |          |
| 1218                                                                                                     | any_organ_failure_free_days     | Any Organ Failure Free Days                        | text                                                                                                                                                                |   |            |   |            |   |          |
| 1219                                                                                                     | concern_of_infection            | Concern Of Infection                               | text                                                                                                                                                                |   |            |   |            |   |          |
| 1220                                                                                                     | rdr_variables_imported_complete | Section Header: <i>Form Status</i><br>Complete?    | dropdown<br><table border="1"> <tr> <td>0</td> <td>Incomplete</td> </tr> <tr> <td>1</td> <td>Unverified</td> </tr> <tr> <td>2</td> <td>Complete</td> </tr> </table> | 0 | Incomplete | 1 | Unverified | 2 | Complete |
| 0                                                                                                        | Incomplete                      |                                                    |                                                                                                                                                                     |   |            |   |            |   |          |
| 1                                                                                                        | Unverified                      |                                                    |                                                                                                                                                                     |   |            |   |            |   |          |
| 2                                                                                                        | Complete                        |                                                    |                                                                                                                                                                     |   |            |   |            |   |          |
| Instrument: <b>Elixhauser Comorbidity Measures (imported)</b> (elixhauser_comorbidity_measures_imported) |                                 |                                                    |                                                                                                                                                                     |   |            |   |            |   |          |
| 1221                                                                                                     | quanelixh_chf                   | Congestive Heart Failure?                          | yesno<br><table border="1"> <tr> <td>1</td> <td>Yes</td> </tr> <tr> <td>0</td> <td>No</td> </tr> </table>                                                           | 1 | Yes        | 0 | No         |   |          |
| 1                                                                                                        | Yes                             |                                                    |                                                                                                                                                                     |   |            |   |            |   |          |
| 0                                                                                                        | No                              |                                                    |                                                                                                                                                                     |   |            |   |            |   |          |
| 1222                                                                                                     | quanelixh_arrhythmia            | Cardiac Arrhythmias?                               | yesno<br><table border="1"> <tr> <td>1</td> <td>Yes</td> </tr> <tr> <td>0</td> <td>No</td> </tr> </table>                                                           | 1 | Yes        | 0 | No         |   |          |
| 1                                                                                                        | Yes                             |                                                    |                                                                                                                                                                     |   |            |   |            |   |          |
| 0                                                                                                        | No                              |                                                    |                                                                                                                                                                     |   |            |   |            |   |          |
| 1223                                                                                                     | quanelixh_valvular              | Cardiac Valvular Disease?                          | yesno<br><table border="1"> <tr> <td>1</td> <td>Yes</td> </tr> <tr> <td>0</td> <td>No</td> </tr> </table>                                                           | 1 | Yes        | 0 | No         |   |          |
| 1                                                                                                        | Yes                             |                                                    |                                                                                                                                                                     |   |            |   |            |   |          |
| 0                                                                                                        | No                              |                                                    |                                                                                                                                                                     |   |            |   |            |   |          |
| 1224                                                                                                     | quanelixh_phtn                  | Pulmonary Circulation Disorders?                   | yesno<br><table border="1"> <tr> <td>1</td> <td>Yes</td> </tr> <tr> <td>0</td> <td>No</td> </tr> </table>                                                           | 1 | Yes        | 0 | No         |   |          |
| 1                                                                                                        | Yes                             |                                                    |                                                                                                                                                                     |   |            |   |            |   |          |
| 0                                                                                                        | No                              |                                                    |                                                                                                                                                                     |   |            |   |            |   |          |
| 1225                                                                                                     | quanelixh_pvd                   | Peripheral Vascular Disorders?                     | yesno<br><table border="1"> <tr> <td>1</td> <td>Yes</td> </tr> <tr> <td>0</td> <td>No</td> </tr> </table>                                                           | 1 | Yes        | 0 | No         |   |          |
| 1                                                                                                        | Yes                             |                                                    |                                                                                                                                                                     |   |            |   |            |   |          |
| 0                                                                                                        | No                              |                                                    |                                                                                                                                                                     |   |            |   |            |   |          |
| 1226                                                                                                     | quanelixh_htn                   | Hypertension (both uncomplicated and complicated)? | yesno<br><table border="1"> <tr> <td>1</td> <td>Yes</td> </tr> <tr> <td>0</td> <td>No</td> </tr> </table>                                                           | 1 | Yes        | 0 | No         |   |          |
| 1                                                                                                        | Yes                             |                                                    |                                                                                                                                                                     |   |            |   |            |   |          |
| 0                                                                                                        | No                              |                                                    |                                                                                                                                                                     |   |            |   |            |   |          |
| 1227                                                                                                     | quanelixh_paralysis             | Paralysis?                                         | yesno<br><table border="1"> <tr> <td>1</td> <td>Yes</td> </tr> <tr> <td>0</td> <td>No</td> </tr> </table>                                                           | 1 | Yes        | 0 | No         |   |          |
| 1                                                                                                        | Yes                             |                                                    |                                                                                                                                                                     |   |            |   |            |   |          |
| 0                                                                                                        | No                              |                                                    |                                                                                                                                                                     |   |            |   |            |   |          |
| 1228                                                                                                     | quanelixh_neuroother            | Other neurological disorders?                      | yesno<br><table border="1"> <tr> <td>1</td> <td>Yes</td> </tr> <tr> <td>0</td> <td>No</td> </tr> </table>                                                           | 1 | Yes        | 0 | No         |   |          |
| 1                                                                                                        | Yes                             |                                                    |                                                                                                                                                                     |   |            |   |            |   |          |
| 0                                                                                                        | No                              |                                                    |                                                                                                                                                                     |   |            |   |            |   |          |
| 1229                                                                                                     | quanelixh_pulmonary             | Chronic Pulmonary Disease?                         | yesno<br><table border="1"> <tr> <td>1</td> <td>Yes</td> </tr> <tr> <td>0</td> <td>No</td> </tr> </table>                                                           | 1 | Yes        | 0 | No         |   |          |
| 1                                                                                                        | Yes                             |                                                    |                                                                                                                                                                     |   |            |   |            |   |          |
| 0                                                                                                        | No                              |                                                    |                                                                                                                                                                     |   |            |   |            |   |          |
| 1230                                                                                                     | quanelixh_dm                    | Diabetes, uncomplicated?                           | yesno<br><table border="1"> <tr> <td>1</td> <td>Yes</td> </tr> <tr> <td>0</td> <td>No</td> </tr> </table>                                                           | 1 | Yes        | 0 | No         |   |          |
| 1                                                                                                        | Yes                             |                                                    |                                                                                                                                                                     |   |            |   |            |   |          |
| 0                                                                                                        | No                              |                                                    |                                                                                                                                                                     |   |            |   |            |   |          |
| 1231                                                                                                     | quanelixh_dmcc                  | Diabetes, complicated?                             | yesno<br><table border="1"> <tr> <td>1</td> <td>Yes</td> </tr> <tr> <td>0</td> <td>No</td> </tr> </table>                                                           | 1 | Yes        | 0 | No         |   |          |
| 1                                                                                                        | Yes                             |                                                    |                                                                                                                                                                     |   |            |   |            |   |          |
| 0                                                                                                        | No                              |                                                    |                                                                                                                                                                     |   |            |   |            |   |          |
| 1232                                                                                                     | quanelixh_hypothyroid           | Hypothyroidism?                                    | yesno<br><table border="1"> <tr> <td>1</td> <td>Yes</td> </tr> <tr> <td>0</td> <td>No</td> </tr> </table>                                                           | 1 | Yes        | 0 | No         |   |          |
| 1                                                                                                        | Yes                             |                                                    |                                                                                                                                                                     |   |            |   |            |   |          |
| 0                                                                                                        | No                              |                                                    |                                                                                                                                                                     |   |            |   |            |   |          |
| 1233                                                                                                     | quanelixh_renal                 | Renal Failure?                                     | yesno<br><table border="1"> <tr> <td>1</td> <td>Yes</td> </tr> <tr> <td>0</td> <td>No</td> </tr> </table>                                                           | 1 | Yes        | 0 | No         |   |          |
| 1                                                                                                        | Yes                             |                                                    |                                                                                                                                                                     |   |            |   |            |   |          |
| 0                                                                                                        | No                              |                                                    |                                                                                                                                                                     |   |            |   |            |   |          |
| 1234                                                                                                     | quanelixh_liver                 | Liver Disease?                                     | yesno<br><table border="1"> <tr> <td>1</td> <td>Yes</td> </tr> <tr> <td>0</td> <td>No</td> </tr> </table>                                                           | 1 | Yes        | 0 | No         |   |          |
| 1                                                                                                        | Yes                             |                                                    |                                                                                                                                                                     |   |            |   |            |   |          |
| 0                                                                                                        | No                              |                                                    |                                                                                                                                                                     |   |            |   |            |   |          |

|      |                        |                                                  |                        |
|------|------------------------|--------------------------------------------------|------------------------|
| 1235 | quanelixh_pud          | Peptic Ulcer Disease Excluding Bleeding?         | yesno<br>1 Yes<br>0 No |
| 1236 | quanelixh_hiv          | HIV?                                             | yesno<br>1 Yes<br>0 No |
| 1237 | quanelixh_lymphoma     | Lymphoma?                                        | yesno<br>1 Yes<br>0 No |
| 1238 | quanelixh_mets         | Metastatic Cancer?                               | yesno<br>1 Yes<br>0 No |
| 1239 | quanelixh_tumor        | Solid Tumor Without Metastasis?                  | yesno<br>1 Yes<br>0 No |
| 1240 | quanelixh_rheumatic    | Rheumatoid Arthritis/Collagen Vascular Diseases? | yesno<br>1 Yes<br>0 No |
| 1241 | quanelixh_coagulopathy | Coagulopathy?                                    | yesno<br>1 Yes<br>0 No |
| 1242 | quanelixh_obesity      | Obesity?                                         | yesno<br>1 Yes<br>0 No |
| 1243 | quanelixh_weightloss   | Weight Loss?                                     | yesno<br>1 Yes<br>0 No |
| 1244 | quanelixh_fluidslytes  | Fluid and Electrolyte Disorders?                 | yesno<br>1 Yes<br>0 No |
| 1245 | quanelixh_bloodloss    | Blood Loss Anemia?                               | yesno<br>1 Yes<br>0 No |
| 1246 | quanelixh_anemia       | Deficiency Anemias?                              | yesno<br>1 Yes<br>0 No |
| 1247 | quanelixh_alcohol      | Alcohol Abuse?                                   | yesno<br>1 Yes<br>0 No |
| 1248 | quanelixh_drugs        | Drug Abuse?                                      | yesno<br>1 Yes<br>0 No |
| 1249 | quanelixh_psychoses    | Psychoses?                                       | yesno<br>1 Yes<br>0 No |
| 1250 | quanelixh_depression   | Depression?                                      | yesno<br>1 Yes<br>0 No |
| 1251 | dx_leukemia            | Leukemia?                                        | yesno<br>1 Yes<br>0 No |

|                                                                                                                              |                                                    |                                                                                |                                                                                                                                                               |
|------------------------------------------------------------------------------------------------------------------------------|----------------------------------------------------|--------------------------------------------------------------------------------|---------------------------------------------------------------------------------------------------------------------------------------------------------------|
| 1252                                                                                                                         | dx_myeloma                                         | Myeloma?                                                                       | yesno<br>1 Yes<br>0 No                                                                                                                                        |
| 1253                                                                                                                         | dx_myelodysplasticsynd                             | Myelodysplastic Syndrome?                                                      | yesno<br>1 Yes<br>0 No                                                                                                                                        |
| 1254                                                                                                                         | dx_bonemarrtrans                                   | Bone Marrow Transplant?                                                        | yesno<br>1 Yes<br>0 No                                                                                                                                        |
| 1255                                                                                                                         | dx_stemcelltrans                                   | Stem Cell Transplant?                                                          | yesno<br>1 Yes<br>0 No                                                                                                                                        |
| 1256                                                                                                                         | elixhauser_comorbidity_measure_s_imported_complete | Section Header: <i>Form Status</i><br>Complete?                                | dropdown<br>0 Incomplete<br>1 Unverified<br>2 Complete                                                                                                        |
| Instrument: <b>Influenza</b> (influenza)                                                                                     |                                                    |                                                                                |                                                                                                                                                               |
| 1257                                                                                                                         | immune_flu                                         | Flu vaccine?                                                                   | yesno<br>1 Yes<br>0 No                                                                                                                                        |
| 1258                                                                                                                         | immune_h1n1                                        | H1N1 vs non-H1N1                                                               | radio<br>1 H1N1<br>2 Non-H1N1                                                                                                                                 |
| 1259                                                                                                                         | influenza_complete                                 | Section Header: <i>Form Status</i><br>Complete?                                | dropdown<br>0 Incomplete<br>1 Unverified<br>2 Complete                                                                                                        |
| Instrument: <b>Personal Information Screening And Demographics (QI)</b> (personal_information_screening_and_demographics_qi) |                                                    |                                                                                |                                                                                                                                                               |
| 1260                                                                                                                         | date_v2                                            | Date                                                                           | text (date_mdY)                                                                                                                                               |
| 1261                                                                                                                         | medical_record_v2                                  | Section Header: <i>Personal Information and Demographics</i><br>Medical Record | text, Identifier                                                                                                                                              |
| 1262                                                                                                                         | first_name_v2                                      | First Name                                                                     | text, Identifier                                                                                                                                              |
| 1263                                                                                                                         | last_name_v2                                       | Last Name                                                                      | text, Identifier                                                                                                                                              |
| 1264                                                                                                                         | date_of_birth_v2                                   | Date of Birth                                                                  | text (date_yMD)                                                                                                                                               |
| 1265                                                                                                                         | ssn_v2                                             | Social Security Number                                                         | text, Identifier                                                                                                                                              |
| 1266                                                                                                                         | age_2_v2                                           | Age in respect to ICU visit                                                    | calc<br>Calculation: rounddown(datediff([icu_admission_date_v2], [date_of_birth_v2], "y", "ymd"), 0)                                                          |
| 1267                                                                                                                         | gender_v2                                          | Gender                                                                         | dropdown<br>1 Male<br>2 Female<br>3 Other                                                                                                                     |
| 1268                                                                                                                         | race_v2                                            | Race                                                                           | dropdown<br>1 Asian<br>2 Black, Non-Hispanic<br>3 White, Non-Hispanic<br>4 Hispanic<br>5 American Indian/Alaskan Native<br>6 Other<br>7 Declined/Not recorded |

|                                                                      |                                                                                                   |                                                                                   |                                                                                                                                                                                                                    |   |                    |   |                        |   |          |   |         |
|----------------------------------------------------------------------|---------------------------------------------------------------------------------------------------|-----------------------------------------------------------------------------------|--------------------------------------------------------------------------------------------------------------------------------------------------------------------------------------------------------------------|---|--------------------|---|------------------------|---|----------|---|---------|
| 1269                                                                 | ethnicity_2_v2                                                                                    | Ethnicity                                                                         | dropdown<br><table border="1"> <tr><td>1</td><td>Hispanic or Latino</td></tr> <tr><td>2</td><td>Not Hispanic or Latino</td></tr> <tr><td>3</td><td>Declined</td></tr> <tr><td>4</td><td>Unknown</td></tr> </table> | 1 | Hispanic or Latino | 2 | Not Hispanic or Latino | 3 | Declined | 4 | Unknown |
| 1                                                                    | Hispanic or Latino                                                                                |                                                                                   |                                                                                                                                                                                                                    |   |                    |   |                        |   |          |   |         |
| 2                                                                    | Not Hispanic or Latino                                                                            |                                                                                   |                                                                                                                                                                                                                    |   |                    |   |                        |   |          |   |         |
| 3                                                                    | Declined                                                                                          |                                                                                   |                                                                                                                                                                                                                    |   |                    |   |                        |   |          |   |         |
| 4                                                                    | Unknown                                                                                           |                                                                                   |                                                                                                                                                                                                                    |   |                    |   |                        |   |          |   |         |
| 1270                                                                 | address_v2                                                                                        | Address                                                                           | text, Identifier                                                                                                                                                                                                   |   |                    |   |                        |   |          |   |         |
| 1271                                                                 | phone_number_v2                                                                                   | Phone Number                                                                      | text, Identifier                                                                                                                                                                                                   |   |                    |   |                        |   |          |   |         |
| 1272                                                                 | ed_date_v2                                                                                        | ED admission date                                                                 | text (date_mdy)                                                                                                                                                                                                    |   |                    |   |                        |   |          |   |         |
| 1273                                                                 | ed_hour_v2                                                                                        | ED admission Hour                                                                 | text (time)                                                                                                                                                                                                        |   |                    |   |                        |   |          |   |         |
| 1274                                                                 | hospital_admission_date_v2                                                                        | Hospital Admission Date                                                           | text (date_mdy)                                                                                                                                                                                                    |   |                    |   |                        |   |          |   |         |
| 1275                                                                 | hospital_admission_hour_v2                                                                        | Hospital Admission Hour (0-23)                                                    | text (time)                                                                                                                                                                                                        |   |                    |   |                        |   |          |   |         |
| 1276                                                                 | icu_admission_date_v2                                                                             | ICU Admission Date                                                                | text (date_ymd)                                                                                                                                                                                                    |   |                    |   |                        |   |          |   |         |
| 1277                                                                 | icu_admission_hour_v2                                                                             | ICU Admission Hour (0-23)                                                         | text (time)                                                                                                                                                                                                        |   |                    |   |                        |   |          |   |         |
| 1278                                                                 | exclusion_criteria_v2                                                                             | Section Header: <i>Screening And Informed Consent</i><br>Meets Exclusion Criteria | dropdown<br><table border="1"> <tr><td>1</td><td>YES</td></tr> <tr><td>0</td><td>NO</td></tr> </table>                                                                                                             | 1 | YES                | 0 | NO                     |   |          |   |         |
| 1                                                                    | YES                                                                                               |                                                                                   |                                                                                                                                                                                                                    |   |                    |   |                        |   |          |   |         |
| 0                                                                    | NO                                                                                                |                                                                                   |                                                                                                                                                                                                                    |   |                    |   |                        |   |          |   |         |
| 1279                                                                 | agreed_consent_v2                                                                                 | Agreed to Consent                                                                 | dropdown<br><table border="1"> <tr><td>1</td><td>YES</td></tr> <tr><td>0</td><td>NO</td></tr> </table>                                                                                                             | 1 | YES                | 0 | NO                     |   |          |   |         |
| 1                                                                    | YES                                                                                               |                                                                                   |                                                                                                                                                                                                                    |   |                    |   |                        |   |          |   |         |
| 0                                                                    | NO                                                                                                |                                                                                   |                                                                                                                                                                                                                    |   |                    |   |                        |   |          |   |         |
| 1280                                                                 | direct_indirect_consent_v2<br>Show the field ONLY if:<br>[agreed_consent_v2] = '1'                | Direct/surrogate Consent                                                          | dropdown<br><table border="1"> <tr><td>1</td><td>Direct</td></tr> <tr><td>2</td><td>Surrogate</td></tr> </table>                                                                                                   | 1 | Direct             | 2 | Surrogate              |   |          |   |         |
| 1                                                                    | Direct                                                                                            |                                                                                   |                                                                                                                                                                                                                    |   |                    |   |                        |   |          |   |         |
| 2                                                                    | Surrogate                                                                                         |                                                                                   |                                                                                                                                                                                                                    |   |                    |   |                        |   |          |   |         |
| 1281                                                                 | consented_person_name_v2<br>Show the field ONLY if:<br>[direct_indirect_consent_v2] = '2'         | Consented Person First Name                                                       | text                                                                                                                                                                                                               |   |                    |   |                        |   |          |   |         |
| 1282                                                                 | consented_last_name_v2<br>Show the field ONLY if:<br>[direct_indirect_consent_v2] = '2'           | Consented Person Last Name                                                        | text                                                                                                                                                                                                               |   |                    |   |                        |   |          |   |         |
| 1283                                                                 | relationship_consented_person_v2<br>Show the field ONLY if:<br>[direct_indirect_consent_v2] = '2' | Consented person relationship to the subject                                      | text                                                                                                                                                                                                               |   |                    |   |                        |   |          |   |         |
| 1284                                                                 | icf_date_v2                                                                                       | Date of signing of inform consent<br><i>icf date</i>                              | text (date_mdy)                                                                                                                                                                                                    |   |                    |   |                        |   |          |   |         |
| 1285                                                                 | informed_consent_v2                                                                               | Informed Consent<br><i>Please upload scanned informed consent</i>                 | file                                                                                                                                                                                                               |   |                    |   |                        |   |          |   |         |
| 1286                                                                 | dna_v2                                                                                            | DNA collection authorized                                                         | dropdown<br><table border="1"> <tr><td>1</td><td>YES</td></tr> <tr><td>0</td><td>NO</td></tr> </table>                                                                                                             | 1 | YES                | 0 | NO                     |   |          |   |         |
| 1                                                                    | YES                                                                                               |                                                                                   |                                                                                                                                                                                                                    |   |                    |   |                        |   |          |   |         |
| 0                                                                    | NO                                                                                                |                                                                                   |                                                                                                                                                                                                                    |   |                    |   |                        |   |          |   |         |
| 1287                                                                 | hrv_authorized_v2                                                                                 | HRV authorized                                                                    | yesno<br><table border="1"> <tr><td>1</td><td>Yes</td></tr> <tr><td>0</td><td>No</td></tr> </table>                                                                                                                | 1 | Yes                | 0 | No                     |   |          |   |         |
| 1                                                                    | Yes                                                                                               |                                                                                   |                                                                                                                                                                                                                    |   |                    |   |                        |   |          |   |         |
| 0                                                                    | No                                                                                                |                                                                                   |                                                                                                                                                                                                                    |   |                    |   |                        |   |          |   |         |
| 1288                                                                 | cytocam_v2                                                                                        | Cytocam authorized                                                                | yesno<br><table border="1"> <tr><td>1</td><td>Yes</td></tr> <tr><td>0</td><td>No</td></tr> </table>                                                                                                                | 1 | Yes                | 0 | No                     |   |          |   |         |
| 1                                                                    | Yes                                                                                               |                                                                                   |                                                                                                                                                                                                                    |   |                    |   |                        |   |          |   |         |
| 0                                                                    | No                                                                                                |                                                                                   |                                                                                                                                                                                                                    |   |                    |   |                        |   |          |   |         |
| 1289                                                                 | recontact_v2                                                                                      | Re-Contact authorized                                                             | dropdown<br><table border="1"> <tr><td>1</td><td>YES</td></tr> <tr><td>0</td><td>NO</td></tr> </table>                                                                                                             | 1 | YES                | 0 | NO                     |   |          |   |         |
| 1                                                                    | YES                                                                                               |                                                                                   |                                                                                                                                                                                                                    |   |                    |   |                        |   |          |   |         |
| 0                                                                    | NO                                                                                                |                                                                                   |                                                                                                                                                                                                                    |   |                    |   |                        |   |          |   |         |
| 1290                                                                 | personal_information_screening_and_demographics_qi_complete                                       | Section Header: <i>Form Status</i><br>Complete?                                   | dropdown<br><table border="1"> <tr><td>0</td><td>Incomplete</td></tr> <tr><td>1</td><td>Unverified</td></tr> <tr><td>2</td><td>Complete</td></tr> </table>                                                         | 0 | Incomplete         | 1 | Unverified             | 2 | Complete |   |         |
| 0                                                                    | Incomplete                                                                                        |                                                                                   |                                                                                                                                                                                                                    |   |                    |   |                        |   |          |   |         |
| 1                                                                    | Unverified                                                                                        |                                                                                   |                                                                                                                                                                                                                    |   |                    |   |                        |   |          |   |         |
| 2                                                                    | Complete                                                                                          |                                                                                   |                                                                                                                                                                                                                    |   |                    |   |                        |   |          |   |         |
| Instrument: <b>Admission Diagnosis (QI)</b> (admission_diagnosis_qi) |                                                                                                   |                                                                                   |                                                                                                                                                                                                                    |   |                    |   |                        |   |          |   |         |



|      |                                                                                                  |                                                                              |                                                                                                                                                                                                                                                                                                                                                                                                                                                                                                                                                                                                                                                                                                                                                                                                                                                                                                                                                                                                                                                                                                                                                                                                                                                                                                                                                                                                                                                                                                                                                                                                                                                                                                                                                                       |   |                             |                    |                 |                            |                                          |   |                                        |           |                        |                            |                          |   |                            |             |       |                            |                           |   |                            |                       |   |                            |                       |   |                            |                     |    |                             |            |    |                             |                 |    |                             |              |    |                             |             |    |                             |                      |    |                             |                     |    |                             |                 |    |                             |                   |    |                             |                                |    |                             |        |    |                             |                          |
|------|--------------------------------------------------------------------------------------------------|------------------------------------------------------------------------------|-----------------------------------------------------------------------------------------------------------------------------------------------------------------------------------------------------------------------------------------------------------------------------------------------------------------------------------------------------------------------------------------------------------------------------------------------------------------------------------------------------------------------------------------------------------------------------------------------------------------------------------------------------------------------------------------------------------------------------------------------------------------------------------------------------------------------------------------------------------------------------------------------------------------------------------------------------------------------------------------------------------------------------------------------------------------------------------------------------------------------------------------------------------------------------------------------------------------------------------------------------------------------------------------------------------------------------------------------------------------------------------------------------------------------------------------------------------------------------------------------------------------------------------------------------------------------------------------------------------------------------------------------------------------------------------------------------------------------------------------------------------------------|---|-----------------------------|--------------------|-----------------|----------------------------|------------------------------------------|---|----------------------------------------|-----------|------------------------|----------------------------|--------------------------|---|----------------------------|-------------|-------|----------------------------|---------------------------|---|----------------------------|-----------------------|---|----------------------------|-----------------------|---|----------------------------|---------------------|----|-----------------------------|------------|----|-----------------------------|-----------------|----|-----------------------------|--------------|----|-----------------------------|-------------|----|-----------------------------|----------------------|----|-----------------------------|---------------------|----|-----------------------------|-----------------|----|-----------------------------|-------------------|----|-----------------------------|--------------------------------|----|-----------------------------|--------|----|-----------------------------|--------------------------|
| 1291 | admission_diagnosiss_v2                                                                          | <p>Section Header: <i>Admission diagnosis</i></p> <p>Admission Diagnosis</p> | <p>checkbox</p> <table border="1"> <tr><td>1</td><td>admission_diagnosiss_v2__1</td><td>Sepsis - suspected</td></tr> <tr><td>2</td><td>admission_diagnosiss_v2__2</td><td>ARDS - Transferred from outside hospital</td></tr> <tr><td>3</td><td>admission_diagnosiss_v2__3</td><td>Pneumonia</td></tr> <tr><td>4</td><td>admission_diagnosiss_v2__4</td><td>Heart Failure</td></tr> <tr><td>5</td><td>admission_diagnosiss_v2__5</td><td>Hypotension</td></tr> <tr><td>6</td><td>admission_diagnosiss_v2__6</td><td>Acute Respiratory Failure</td></tr> <tr><td>7</td><td>admission_diagnosiss_v2__7</td><td>Altered Mental Status</td></tr> <tr><td>8</td><td>admission_diagnosiss_v2__8</td><td>Drug/alcohol overdose</td></tr> <tr><td>9</td><td>admission_diagnosiss_v2__9</td><td>Asthma Exacerbation</td></tr> <tr><td>10</td><td>admission_diagnosiss_v2__10</td><td>Chest pain</td></tr> <tr><td>11</td><td>admission_diagnosiss_v2__11</td><td>Liver Cirrhosis</td></tr> <tr><td>12</td><td>admission_diagnosiss_v2__12</td><td>Pancreatitis</td></tr> <tr><td>13</td><td>admission_diagnosiss_v2__13</td><td>GI Bleeding</td></tr> <tr><td>14</td><td>admission_diagnosiss_v2__14</td><td>Acute Kidney Failure</td></tr> <tr><td>15</td><td>admission_diagnosiss_v2__15</td><td>Acute Liver Failure</td></tr> <tr><td>16</td><td>admission_diagnosiss_v2__16</td><td>Other Infection</td></tr> <tr><td>17</td><td>admission_diagnosiss_v2__17</td><td>COPD exacerbation</td></tr> <tr><td>18</td><td>admission_diagnosiss_v2__18</td><td>Chronic non-COPD lung diseases</td></tr> <tr><td>19</td><td>admission_diagnosiss_v2__19</td><td>Trauma</td></tr> <tr><td>20</td><td>admission_diagnosiss_v2__20</td><td>Cerebro-Vascular disease</td></tr> </table> | 1 | admission_diagnosiss_v2__1  | Sepsis - suspected | 2               | admission_diagnosiss_v2__2 | ARDS - Transferred from outside hospital | 3 | admission_diagnosiss_v2__3             | Pneumonia | 4                      | admission_diagnosiss_v2__4 | Heart Failure            | 5 | admission_diagnosiss_v2__5 | Hypotension | 6     | admission_diagnosiss_v2__6 | Acute Respiratory Failure | 7 | admission_diagnosiss_v2__7 | Altered Mental Status | 8 | admission_diagnosiss_v2__8 | Drug/alcohol overdose | 9 | admission_diagnosiss_v2__9 | Asthma Exacerbation | 10 | admission_diagnosiss_v2__10 | Chest pain | 11 | admission_diagnosiss_v2__11 | Liver Cirrhosis | 12 | admission_diagnosiss_v2__12 | Pancreatitis | 13 | admission_diagnosiss_v2__13 | GI Bleeding | 14 | admission_diagnosiss_v2__14 | Acute Kidney Failure | 15 | admission_diagnosiss_v2__15 | Acute Liver Failure | 16 | admission_diagnosiss_v2__16 | Other Infection | 17 | admission_diagnosiss_v2__17 | COPD exacerbation | 18 | admission_diagnosiss_v2__18 | Chronic non-COPD lung diseases | 19 | admission_diagnosiss_v2__19 | Trauma | 20 | admission_diagnosiss_v2__20 | Cerebro-Vascular disease |
| 1    | admission_diagnosiss_v2__1                                                                       | Sepsis - suspected                                                           |                                                                                                                                                                                                                                                                                                                                                                                                                                                                                                                                                                                                                                                                                                                                                                                                                                                                                                                                                                                                                                                                                                                                                                                                                                                                                                                                                                                                                                                                                                                                                                                                                                                                                                                                                                       |   |                             |                    |                 |                            |                                          |   |                                        |           |                        |                            |                          |   |                            |             |       |                            |                           |   |                            |                       |   |                            |                       |   |                            |                     |    |                             |            |    |                             |                 |    |                             |              |    |                             |             |    |                             |                      |    |                             |                     |    |                             |                 |    |                             |                   |    |                             |                                |    |                             |        |    |                             |                          |
| 2    | admission_diagnosiss_v2__2                                                                       | ARDS - Transferred from outside hospital                                     |                                                                                                                                                                                                                                                                                                                                                                                                                                                                                                                                                                                                                                                                                                                                                                                                                                                                                                                                                                                                                                                                                                                                                                                                                                                                                                                                                                                                                                                                                                                                                                                                                                                                                                                                                                       |   |                             |                    |                 |                            |                                          |   |                                        |           |                        |                            |                          |   |                            |             |       |                            |                           |   |                            |                       |   |                            |                       |   |                            |                     |    |                             |            |    |                             |                 |    |                             |              |    |                             |             |    |                             |                      |    |                             |                     |    |                             |                 |    |                             |                   |    |                             |                                |    |                             |        |    |                             |                          |
| 3    | admission_diagnosiss_v2__3                                                                       | Pneumonia                                                                    |                                                                                                                                                                                                                                                                                                                                                                                                                                                                                                                                                                                                                                                                                                                                                                                                                                                                                                                                                                                                                                                                                                                                                                                                                                                                                                                                                                                                                                                                                                                                                                                                                                                                                                                                                                       |   |                             |                    |                 |                            |                                          |   |                                        |           |                        |                            |                          |   |                            |             |       |                            |                           |   |                            |                       |   |                            |                       |   |                            |                     |    |                             |            |    |                             |                 |    |                             |              |    |                             |             |    |                             |                      |    |                             |                     |    |                             |                 |    |                             |                   |    |                             |                                |    |                             |        |    |                             |                          |
| 4    | admission_diagnosiss_v2__4                                                                       | Heart Failure                                                                |                                                                                                                                                                                                                                                                                                                                                                                                                                                                                                                                                                                                                                                                                                                                                                                                                                                                                                                                                                                                                                                                                                                                                                                                                                                                                                                                                                                                                                                                                                                                                                                                                                                                                                                                                                       |   |                             |                    |                 |                            |                                          |   |                                        |           |                        |                            |                          |   |                            |             |       |                            |                           |   |                            |                       |   |                            |                       |   |                            |                     |    |                             |            |    |                             |                 |    |                             |              |    |                             |             |    |                             |                      |    |                             |                     |    |                             |                 |    |                             |                   |    |                             |                                |    |                             |        |    |                             |                          |
| 5    | admission_diagnosiss_v2__5                                                                       | Hypotension                                                                  |                                                                                                                                                                                                                                                                                                                                                                                                                                                                                                                                                                                                                                                                                                                                                                                                                                                                                                                                                                                                                                                                                                                                                                                                                                                                                                                                                                                                                                                                                                                                                                                                                                                                                                                                                                       |   |                             |                    |                 |                            |                                          |   |                                        |           |                        |                            |                          |   |                            |             |       |                            |                           |   |                            |                       |   |                            |                       |   |                            |                     |    |                             |            |    |                             |                 |    |                             |              |    |                             |             |    |                             |                      |    |                             |                     |    |                             |                 |    |                             |                   |    |                             |                                |    |                             |        |    |                             |                          |
| 6    | admission_diagnosiss_v2__6                                                                       | Acute Respiratory Failure                                                    |                                                                                                                                                                                                                                                                                                                                                                                                                                                                                                                                                                                                                                                                                                                                                                                                                                                                                                                                                                                                                                                                                                                                                                                                                                                                                                                                                                                                                                                                                                                                                                                                                                                                                                                                                                       |   |                             |                    |                 |                            |                                          |   |                                        |           |                        |                            |                          |   |                            |             |       |                            |                           |   |                            |                       |   |                            |                       |   |                            |                     |    |                             |            |    |                             |                 |    |                             |              |    |                             |             |    |                             |                      |    |                             |                     |    |                             |                 |    |                             |                   |    |                             |                                |    |                             |        |    |                             |                          |
| 7    | admission_diagnosiss_v2__7                                                                       | Altered Mental Status                                                        |                                                                                                                                                                                                                                                                                                                                                                                                                                                                                                                                                                                                                                                                                                                                                                                                                                                                                                                                                                                                                                                                                                                                                                                                                                                                                                                                                                                                                                                                                                                                                                                                                                                                                                                                                                       |   |                             |                    |                 |                            |                                          |   |                                        |           |                        |                            |                          |   |                            |             |       |                            |                           |   |                            |                       |   |                            |                       |   |                            |                     |    |                             |            |    |                             |                 |    |                             |              |    |                             |             |    |                             |                      |    |                             |                     |    |                             |                 |    |                             |                   |    |                             |                                |    |                             |        |    |                             |                          |
| 8    | admission_diagnosiss_v2__8                                                                       | Drug/alcohol overdose                                                        |                                                                                                                                                                                                                                                                                                                                                                                                                                                                                                                                                                                                                                                                                                                                                                                                                                                                                                                                                                                                                                                                                                                                                                                                                                                                                                                                                                                                                                                                                                                                                                                                                                                                                                                                                                       |   |                             |                    |                 |                            |                                          |   |                                        |           |                        |                            |                          |   |                            |             |       |                            |                           |   |                            |                       |   |                            |                       |   |                            |                     |    |                             |            |    |                             |                 |    |                             |              |    |                             |             |    |                             |                      |    |                             |                     |    |                             |                 |    |                             |                   |    |                             |                                |    |                             |        |    |                             |                          |
| 9    | admission_diagnosiss_v2__9                                                                       | Asthma Exacerbation                                                          |                                                                                                                                                                                                                                                                                                                                                                                                                                                                                                                                                                                                                                                                                                                                                                                                                                                                                                                                                                                                                                                                                                                                                                                                                                                                                                                                                                                                                                                                                                                                                                                                                                                                                                                                                                       |   |                             |                    |                 |                            |                                          |   |                                        |           |                        |                            |                          |   |                            |             |       |                            |                           |   |                            |                       |   |                            |                       |   |                            |                     |    |                             |            |    |                             |                 |    |                             |              |    |                             |             |    |                             |                      |    |                             |                     |    |                             |                 |    |                             |                   |    |                             |                                |    |                             |        |    |                             |                          |
| 10   | admission_diagnosiss_v2__10                                                                      | Chest pain                                                                   |                                                                                                                                                                                                                                                                                                                                                                                                                                                                                                                                                                                                                                                                                                                                                                                                                                                                                                                                                                                                                                                                                                                                                                                                                                                                                                                                                                                                                                                                                                                                                                                                                                                                                                                                                                       |   |                             |                    |                 |                            |                                          |   |                                        |           |                        |                            |                          |   |                            |             |       |                            |                           |   |                            |                       |   |                            |                       |   |                            |                     |    |                             |            |    |                             |                 |    |                             |              |    |                             |             |    |                             |                      |    |                             |                     |    |                             |                 |    |                             |                   |    |                             |                                |    |                             |        |    |                             |                          |
| 11   | admission_diagnosiss_v2__11                                                                      | Liver Cirrhosis                                                              |                                                                                                                                                                                                                                                                                                                                                                                                                                                                                                                                                                                                                                                                                                                                                                                                                                                                                                                                                                                                                                                                                                                                                                                                                                                                                                                                                                                                                                                                                                                                                                                                                                                                                                                                                                       |   |                             |                    |                 |                            |                                          |   |                                        |           |                        |                            |                          |   |                            |             |       |                            |                           |   |                            |                       |   |                            |                       |   |                            |                     |    |                             |            |    |                             |                 |    |                             |              |    |                             |             |    |                             |                      |    |                             |                     |    |                             |                 |    |                             |                   |    |                             |                                |    |                             |        |    |                             |                          |
| 12   | admission_diagnosiss_v2__12                                                                      | Pancreatitis                                                                 |                                                                                                                                                                                                                                                                                                                                                                                                                                                                                                                                                                                                                                                                                                                                                                                                                                                                                                                                                                                                                                                                                                                                                                                                                                                                                                                                                                                                                                                                                                                                                                                                                                                                                                                                                                       |   |                             |                    |                 |                            |                                          |   |                                        |           |                        |                            |                          |   |                            |             |       |                            |                           |   |                            |                       |   |                            |                       |   |                            |                     |    |                             |            |    |                             |                 |    |                             |              |    |                             |             |    |                             |                      |    |                             |                     |    |                             |                 |    |                             |                   |    |                             |                                |    |                             |        |    |                             |                          |
| 13   | admission_diagnosiss_v2__13                                                                      | GI Bleeding                                                                  |                                                                                                                                                                                                                                                                                                                                                                                                                                                                                                                                                                                                                                                                                                                                                                                                                                                                                                                                                                                                                                                                                                                                                                                                                                                                                                                                                                                                                                                                                                                                                                                                                                                                                                                                                                       |   |                             |                    |                 |                            |                                          |   |                                        |           |                        |                            |                          |   |                            |             |       |                            |                           |   |                            |                       |   |                            |                       |   |                            |                     |    |                             |            |    |                             |                 |    |                             |              |    |                             |             |    |                             |                      |    |                             |                     |    |                             |                 |    |                             |                   |    |                             |                                |    |                             |        |    |                             |                          |
| 14   | admission_diagnosiss_v2__14                                                                      | Acute Kidney Failure                                                         |                                                                                                                                                                                                                                                                                                                                                                                                                                                                                                                                                                                                                                                                                                                                                                                                                                                                                                                                                                                                                                                                                                                                                                                                                                                                                                                                                                                                                                                                                                                                                                                                                                                                                                                                                                       |   |                             |                    |                 |                            |                                          |   |                                        |           |                        |                            |                          |   |                            |             |       |                            |                           |   |                            |                       |   |                            |                       |   |                            |                     |    |                             |            |    |                             |                 |    |                             |              |    |                             |             |    |                             |                      |    |                             |                     |    |                             |                 |    |                             |                   |    |                             |                                |    |                             |        |    |                             |                          |
| 15   | admission_diagnosiss_v2__15                                                                      | Acute Liver Failure                                                          |                                                                                                                                                                                                                                                                                                                                                                                                                                                                                                                                                                                                                                                                                                                                                                                                                                                                                                                                                                                                                                                                                                                                                                                                                                                                                                                                                                                                                                                                                                                                                                                                                                                                                                                                                                       |   |                             |                    |                 |                            |                                          |   |                                        |           |                        |                            |                          |   |                            |             |       |                            |                           |   |                            |                       |   |                            |                       |   |                            |                     |    |                             |            |    |                             |                 |    |                             |              |    |                             |             |    |                             |                      |    |                             |                     |    |                             |                 |    |                             |                   |    |                             |                                |    |                             |        |    |                             |                          |
| 16   | admission_diagnosiss_v2__16                                                                      | Other Infection                                                              |                                                                                                                                                                                                                                                                                                                                                                                                                                                                                                                                                                                                                                                                                                                                                                                                                                                                                                                                                                                                                                                                                                                                                                                                                                                                                                                                                                                                                                                                                                                                                                                                                                                                                                                                                                       |   |                             |                    |                 |                            |                                          |   |                                        |           |                        |                            |                          |   |                            |             |       |                            |                           |   |                            |                       |   |                            |                       |   |                            |                     |    |                             |            |    |                             |                 |    |                             |              |    |                             |             |    |                             |                      |    |                             |                     |    |                             |                 |    |                             |                   |    |                             |                                |    |                             |        |    |                             |                          |
| 17   | admission_diagnosiss_v2__17                                                                      | COPD exacerbation                                                            |                                                                                                                                                                                                                                                                                                                                                                                                                                                                                                                                                                                                                                                                                                                                                                                                                                                                                                                                                                                                                                                                                                                                                                                                                                                                                                                                                                                                                                                                                                                                                                                                                                                                                                                                                                       |   |                             |                    |                 |                            |                                          |   |                                        |           |                        |                            |                          |   |                            |             |       |                            |                           |   |                            |                       |   |                            |                       |   |                            |                     |    |                             |            |    |                             |                 |    |                             |              |    |                             |             |    |                             |                      |    |                             |                     |    |                             |                 |    |                             |                   |    |                             |                                |    |                             |        |    |                             |                          |
| 18   | admission_diagnosiss_v2__18                                                                      | Chronic non-COPD lung diseases                                               |                                                                                                                                                                                                                                                                                                                                                                                                                                                                                                                                                                                                                                                                                                                                                                                                                                                                                                                                                                                                                                                                                                                                                                                                                                                                                                                                                                                                                                                                                                                                                                                                                                                                                                                                                                       |   |                             |                    |                 |                            |                                          |   |                                        |           |                        |                            |                          |   |                            |             |       |                            |                           |   |                            |                       |   |                            |                       |   |                            |                     |    |                             |            |    |                             |                 |    |                             |              |    |                             |             |    |                             |                      |    |                             |                     |    |                             |                 |    |                             |                   |    |                             |                                |    |                             |        |    |                             |                          |
| 19   | admission_diagnosiss_v2__19                                                                      | Trauma                                                                       |                                                                                                                                                                                                                                                                                                                                                                                                                                                                                                                                                                                                                                                                                                                                                                                                                                                                                                                                                                                                                                                                                                                                                                                                                                                                                                                                                                                                                                                                                                                                                                                                                                                                                                                                                                       |   |                             |                    |                 |                            |                                          |   |                                        |           |                        |                            |                          |   |                            |             |       |                            |                           |   |                            |                       |   |                            |                       |   |                            |                     |    |                             |            |    |                             |                 |    |                             |              |    |                             |             |    |                             |                      |    |                             |                     |    |                             |                 |    |                             |                   |    |                             |                                |    |                             |        |    |                             |                          |
| 20   | admission_diagnosiss_v2__20                                                                      | Cerebro-Vascular disease                                                     |                                                                                                                                                                                                                                                                                                                                                                                                                                                                                                                                                                                                                                                                                                                                                                                                                                                                                                                                                                                                                                                                                                                                                                                                                                                                                                                                                                                                                                                                                                                                                                                                                                                                                                                                                                       |   |                             |                    |                 |                            |                                          |   |                                        |           |                        |                            |                          |   |                            |             |       |                            |                           |   |                            |                       |   |                            |                       |   |                            |                     |    |                             |            |    |                             |                 |    |                             |              |    |                             |             |    |                             |                      |    |                             |                     |    |                             |                 |    |                             |                   |    |                             |                                |    |                             |        |    |                             |                          |
| 1292 | <p>type_chest_pain_v2</p> <p>Show the field ONLY if:<br/>[admission_diagnosiss_v2(10)] = '1'</p> | Chest Pain (origin suspected)                                                | <p>dropdown</p> <table border="1"> <tr><td>1</td><td>Cardiovascular</td></tr> <tr><td>2</td><td>Respiratory</td></tr> <tr><td>3</td><td>Gastrointestinal</td></tr> <tr><td>4</td><td>Chest wall</td></tr> <tr><td>5</td><td>Psychological</td></tr> <tr><td>6</td><td>Other</td></tr> </table>                                                                                                                                                                                                                                                                                                                                                                                                                                                                                                                                                                                                                                                                                                                                                                                                                                                                                                                                                                                                                                                                                                                                                                                                                                                                                                                                                                                                                                                                        | 1 | Cardiovascular              | 2                  | Respiratory     | 3                          | Gastrointestinal                         | 4 | Chest wall                             | 5         | Psychological          | 6                          | Other                    |   |                            |             |       |                            |                           |   |                            |                       |   |                            |                       |   |                            |                     |    |                             |            |    |                             |                 |    |                             |              |    |                             |             |    |                             |                      |    |                             |                     |    |                             |                 |    |                             |                   |    |                             |                                |    |                             |        |    |                             |                          |
| 1    | Cardiovascular                                                                                   |                                                                              |                                                                                                                                                                                                                                                                                                                                                                                                                                                                                                                                                                                                                                                                                                                                                                                                                                                                                                                                                                                                                                                                                                                                                                                                                                                                                                                                                                                                                                                                                                                                                                                                                                                                                                                                                                       |   |                             |                    |                 |                            |                                          |   |                                        |           |                        |                            |                          |   |                            |             |       |                            |                           |   |                            |                       |   |                            |                       |   |                            |                     |    |                             |            |    |                             |                 |    |                             |              |    |                             |             |    |                             |                      |    |                             |                     |    |                             |                 |    |                             |                   |    |                             |                                |    |                             |        |    |                             |                          |
| 2    | Respiratory                                                                                      |                                                                              |                                                                                                                                                                                                                                                                                                                                                                                                                                                                                                                                                                                                                                                                                                                                                                                                                                                                                                                                                                                                                                                                                                                                                                                                                                                                                                                                                                                                                                                                                                                                                                                                                                                                                                                                                                       |   |                             |                    |                 |                            |                                          |   |                                        |           |                        |                            |                          |   |                            |             |       |                            |                           |   |                            |                       |   |                            |                       |   |                            |                     |    |                             |            |    |                             |                 |    |                             |              |    |                             |             |    |                             |                      |    |                             |                     |    |                             |                 |    |                             |                   |    |                             |                                |    |                             |        |    |                             |                          |
| 3    | Gastrointestinal                                                                                 |                                                                              |                                                                                                                                                                                                                                                                                                                                                                                                                                                                                                                                                                                                                                                                                                                                                                                                                                                                                                                                                                                                                                                                                                                                                                                                                                                                                                                                                                                                                                                                                                                                                                                                                                                                                                                                                                       |   |                             |                    |                 |                            |                                          |   |                                        |           |                        |                            |                          |   |                            |             |       |                            |                           |   |                            |                       |   |                            |                       |   |                            |                     |    |                             |            |    |                             |                 |    |                             |              |    |                             |             |    |                             |                      |    |                             |                     |    |                             |                 |    |                             |                   |    |                             |                                |    |                             |        |    |                             |                          |
| 4    | Chest wall                                                                                       |                                                                              |                                                                                                                                                                                                                                                                                                                                                                                                                                                                                                                                                                                                                                                                                                                                                                                                                                                                                                                                                                                                                                                                                                                                                                                                                                                                                                                                                                                                                                                                                                                                                                                                                                                                                                                                                                       |   |                             |                    |                 |                            |                                          |   |                                        |           |                        |                            |                          |   |                            |             |       |                            |                           |   |                            |                       |   |                            |                       |   |                            |                     |    |                             |            |    |                             |                 |    |                             |              |    |                             |             |    |                             |                      |    |                             |                     |    |                             |                 |    |                             |                   |    |                             |                                |    |                             |        |    |                             |                          |
| 5    | Psychological                                                                                    |                                                                              |                                                                                                                                                                                                                                                                                                                                                                                                                                                                                                                                                                                                                                                                                                                                                                                                                                                                                                                                                                                                                                                                                                                                                                                                                                                                                                                                                                                                                                                                                                                                                                                                                                                                                                                                                                       |   |                             |                    |                 |                            |                                          |   |                                        |           |                        |                            |                          |   |                            |             |       |                            |                           |   |                            |                       |   |                            |                       |   |                            |                     |    |                             |            |    |                             |                 |    |                             |              |    |                             |             |    |                             |                      |    |                             |                     |    |                             |                 |    |                             |                   |    |                             |                                |    |                             |        |    |                             |                          |
| 6    | Other                                                                                            |                                                                              |                                                                                                                                                                                                                                                                                                                                                                                                                                                                                                                                                                                                                                                                                                                                                                                                                                                                                                                                                                                                                                                                                                                                                                                                                                                                                                                                                                                                                                                                                                                                                                                                                                                                                                                                                                       |   |                             |                    |                 |                            |                                          |   |                                        |           |                        |                            |                          |   |                            |             |       |                            |                           |   |                            |                       |   |                            |                       |   |                            |                     |    |                             |            |    |                             |                 |    |                             |              |    |                             |             |    |                             |                      |    |                             |                     |    |                             |                 |    |                             |                   |    |                             |                                |    |                             |        |    |                             |                          |
| 1293 | <p>suspected_cardiac_v2</p> <p>Show the field ONLY if:<br/>[type_chest_pain_v2] = '1'</p>        | Cardiovascular suspected cause                                               | <p>dropdown</p> <table border="1"> <tr><td>1</td><td>Acute Myocardial Infarction</td></tr> <tr><td>2</td><td>Unstable angina</td></tr> <tr><td>3</td><td>Pericarditis-cardiac tamponade</td></tr> <tr><td>4</td><td>Miocarditis</td></tr> <tr><td>5</td><td>Aortic Dissection</td></tr> <tr><td>6</td><td>Arrhythmia</td></tr> <tr><td>7</td><td>Aortic Aneurysm</td></tr> <tr><td>8</td><td>other</td></tr> </table>                                                                                                                                                                                                                                                                                                                                                                                                                                                                                                                                                                                                                                                                                                                                                                                                                                                                                                                                                                                                                                                                                                                                                                                                                                                                                                                                                 | 1 | Acute Myocardial Infarction | 2                  | Unstable angina | 3                          | Pericarditis-cardiac tamponade           | 4 | Miocarditis                            | 5         | Aortic Dissection      | 6                          | Arrhythmia               | 7 | Aortic Aneurysm            | 8           | other |                            |                           |   |                            |                       |   |                            |                       |   |                            |                     |    |                             |            |    |                             |                 |    |                             |              |    |                             |             |    |                             |                      |    |                             |                     |    |                             |                 |    |                             |                   |    |                             |                                |    |                             |        |    |                             |                          |
| 1    | Acute Myocardial Infarction                                                                      |                                                                              |                                                                                                                                                                                                                                                                                                                                                                                                                                                                                                                                                                                                                                                                                                                                                                                                                                                                                                                                                                                                                                                                                                                                                                                                                                                                                                                                                                                                                                                                                                                                                                                                                                                                                                                                                                       |   |                             |                    |                 |                            |                                          |   |                                        |           |                        |                            |                          |   |                            |             |       |                            |                           |   |                            |                       |   |                            |                       |   |                            |                     |    |                             |            |    |                             |                 |    |                             |              |    |                             |             |    |                             |                      |    |                             |                     |    |                             |                 |    |                             |                   |    |                             |                                |    |                             |        |    |                             |                          |
| 2    | Unstable angina                                                                                  |                                                                              |                                                                                                                                                                                                                                                                                                                                                                                                                                                                                                                                                                                                                                                                                                                                                                                                                                                                                                                                                                                                                                                                                                                                                                                                                                                                                                                                                                                                                                                                                                                                                                                                                                                                                                                                                                       |   |                             |                    |                 |                            |                                          |   |                                        |           |                        |                            |                          |   |                            |             |       |                            |                           |   |                            |                       |   |                            |                       |   |                            |                     |    |                             |            |    |                             |                 |    |                             |              |    |                             |             |    |                             |                      |    |                             |                     |    |                             |                 |    |                             |                   |    |                             |                                |    |                             |        |    |                             |                          |
| 3    | Pericarditis-cardiac tamponade                                                                   |                                                                              |                                                                                                                                                                                                                                                                                                                                                                                                                                                                                                                                                                                                                                                                                                                                                                                                                                                                                                                                                                                                                                                                                                                                                                                                                                                                                                                                                                                                                                                                                                                                                                                                                                                                                                                                                                       |   |                             |                    |                 |                            |                                          |   |                                        |           |                        |                            |                          |   |                            |             |       |                            |                           |   |                            |                       |   |                            |                       |   |                            |                     |    |                             |            |    |                             |                 |    |                             |              |    |                             |             |    |                             |                      |    |                             |                     |    |                             |                 |    |                             |                   |    |                             |                                |    |                             |        |    |                             |                          |
| 4    | Miocarditis                                                                                      |                                                                              |                                                                                                                                                                                                                                                                                                                                                                                                                                                                                                                                                                                                                                                                                                                                                                                                                                                                                                                                                                                                                                                                                                                                                                                                                                                                                                                                                                                                                                                                                                                                                                                                                                                                                                                                                                       |   |                             |                    |                 |                            |                                          |   |                                        |           |                        |                            |                          |   |                            |             |       |                            |                           |   |                            |                       |   |                            |                       |   |                            |                     |    |                             |            |    |                             |                 |    |                             |              |    |                             |             |    |                             |                      |    |                             |                     |    |                             |                 |    |                             |                   |    |                             |                                |    |                             |        |    |                             |                          |
| 5    | Aortic Dissection                                                                                |                                                                              |                                                                                                                                                                                                                                                                                                                                                                                                                                                                                                                                                                                                                                                                                                                                                                                                                                                                                                                                                                                                                                                                                                                                                                                                                                                                                                                                                                                                                                                                                                                                                                                                                                                                                                                                                                       |   |                             |                    |                 |                            |                                          |   |                                        |           |                        |                            |                          |   |                            |             |       |                            |                           |   |                            |                       |   |                            |                       |   |                            |                     |    |                             |            |    |                             |                 |    |                             |              |    |                             |             |    |                             |                      |    |                             |                     |    |                             |                 |    |                             |                   |    |                             |                                |    |                             |        |    |                             |                          |
| 6    | Arrhythmia                                                                                       |                                                                              |                                                                                                                                                                                                                                                                                                                                                                                                                                                                                                                                                                                                                                                                                                                                                                                                                                                                                                                                                                                                                                                                                                                                                                                                                                                                                                                                                                                                                                                                                                                                                                                                                                                                                                                                                                       |   |                             |                    |                 |                            |                                          |   |                                        |           |                        |                            |                          |   |                            |             |       |                            |                           |   |                            |                       |   |                            |                       |   |                            |                     |    |                             |            |    |                             |                 |    |                             |              |    |                             |             |    |                             |                      |    |                             |                     |    |                             |                 |    |                             |                   |    |                             |                                |    |                             |        |    |                             |                          |
| 7    | Aortic Aneurysm                                                                                  |                                                                              |                                                                                                                                                                                                                                                                                                                                                                                                                                                                                                                                                                                                                                                                                                                                                                                                                                                                                                                                                                                                                                                                                                                                                                                                                                                                                                                                                                                                                                                                                                                                                                                                                                                                                                                                                                       |   |                             |                    |                 |                            |                                          |   |                                        |           |                        |                            |                          |   |                            |             |       |                            |                           |   |                            |                       |   |                            |                       |   |                            |                     |    |                             |            |    |                             |                 |    |                             |              |    |                             |             |    |                             |                      |    |                             |                     |    |                             |                 |    |                             |                   |    |                             |                                |    |                             |        |    |                             |                          |
| 8    | other                                                                                            |                                                                              |                                                                                                                                                                                                                                                                                                                                                                                                                                                                                                                                                                                                                                                                                                                                                                                                                                                                                                                                                                                                                                                                                                                                                                                                                                                                                                                                                                                                                                                                                                                                                                                                                                                                                                                                                                       |   |                             |                    |                 |                            |                                          |   |                                        |           |                        |                            |                          |   |                            |             |       |                            |                           |   |                            |                       |   |                            |                       |   |                            |                     |    |                             |            |    |                             |                 |    |                             |              |    |                             |             |    |                             |                      |    |                             |                     |    |                             |                 |    |                             |                   |    |                             |                                |    |                             |        |    |                             |                          |
| 1294 | <p>type_infection_v2</p> <p>Show the field ONLY if:<br/>[admission_diagnosiss_v2(16)] = '1'</p>  | <p>Other infection</p> <p><i>Select from options</i></p>                     | <p>dropdown</p> <table border="1"> <tr><td>1</td><td>Neuroinfection</td></tr> <tr><td>2</td><td>Skin</td></tr> <tr><td>3</td><td>Genito/Urinary Tract</td></tr> <tr><td>4</td><td>Respiratory Tract other than Pneumonia</td></tr> <tr><td>5</td><td>Gastrointestinal Tract</td></tr> <tr><td>6</td><td>Joint and bone infection</td></tr> </table>                                                                                                                                                                                                                                                                                                                                                                                                                                                                                                                                                                                                                                                                                                                                                                                                                                                                                                                                                                                                                                                                                                                                                                                                                                                                                                                                                                                                                   | 1 | Neuroinfection              | 2                  | Skin            | 3                          | Genito/Urinary Tract                     | 4 | Respiratory Tract other than Pneumonia | 5         | Gastrointestinal Tract | 6                          | Joint and bone infection |   |                            |             |       |                            |                           |   |                            |                       |   |                            |                       |   |                            |                     |    |                             |            |    |                             |                 |    |                             |              |    |                             |             |    |                             |                      |    |                             |                     |    |                             |                 |    |                             |                   |    |                             |                                |    |                             |        |    |                             |                          |
| 1    | Neuroinfection                                                                                   |                                                                              |                                                                                                                                                                                                                                                                                                                                                                                                                                                                                                                                                                                                                                                                                                                                                                                                                                                                                                                                                                                                                                                                                                                                                                                                                                                                                                                                                                                                                                                                                                                                                                                                                                                                                                                                                                       |   |                             |                    |                 |                            |                                          |   |                                        |           |                        |                            |                          |   |                            |             |       |                            |                           |   |                            |                       |   |                            |                       |   |                            |                     |    |                             |            |    |                             |                 |    |                             |              |    |                             |             |    |                             |                      |    |                             |                     |    |                             |                 |    |                             |                   |    |                             |                                |    |                             |        |    |                             |                          |
| 2    | Skin                                                                                             |                                                                              |                                                                                                                                                                                                                                                                                                                                                                                                                                                                                                                                                                                                                                                                                                                                                                                                                                                                                                                                                                                                                                                                                                                                                                                                                                                                                                                                                                                                                                                                                                                                                                                                                                                                                                                                                                       |   |                             |                    |                 |                            |                                          |   |                                        |           |                        |                            |                          |   |                            |             |       |                            |                           |   |                            |                       |   |                            |                       |   |                            |                     |    |                             |            |    |                             |                 |    |                             |              |    |                             |             |    |                             |                      |    |                             |                     |    |                             |                 |    |                             |                   |    |                             |                                |    |                             |        |    |                             |                          |
| 3    | Genito/Urinary Tract                                                                             |                                                                              |                                                                                                                                                                                                                                                                                                                                                                                                                                                                                                                                                                                                                                                                                                                                                                                                                                                                                                                                                                                                                                                                                                                                                                                                                                                                                                                                                                                                                                                                                                                                                                                                                                                                                                                                                                       |   |                             |                    |                 |                            |                                          |   |                                        |           |                        |                            |                          |   |                            |             |       |                            |                           |   |                            |                       |   |                            |                       |   |                            |                     |    |                             |            |    |                             |                 |    |                             |              |    |                             |             |    |                             |                      |    |                             |                     |    |                             |                 |    |                             |                   |    |                             |                                |    |                             |        |    |                             |                          |
| 4    | Respiratory Tract other than Pneumonia                                                           |                                                                              |                                                                                                                                                                                                                                                                                                                                                                                                                                                                                                                                                                                                                                                                                                                                                                                                                                                                                                                                                                                                                                                                                                                                                                                                                                                                                                                                                                                                                                                                                                                                                                                                                                                                                                                                                                       |   |                             |                    |                 |                            |                                          |   |                                        |           |                        |                            |                          |   |                            |             |       |                            |                           |   |                            |                       |   |                            |                       |   |                            |                     |    |                             |            |    |                             |                 |    |                             |              |    |                             |             |    |                             |                      |    |                             |                     |    |                             |                 |    |                             |                   |    |                             |                                |    |                             |        |    |                             |                          |
| 5    | Gastrointestinal Tract                                                                           |                                                                              |                                                                                                                                                                                                                                                                                                                                                                                                                                                                                                                                                                                                                                                                                                                                                                                                                                                                                                                                                                                                                                                                                                                                                                                                                                                                                                                                                                                                                                                                                                                                                                                                                                                                                                                                                                       |   |                             |                    |                 |                            |                                          |   |                                        |           |                        |                            |                          |   |                            |             |       |                            |                           |   |                            |                       |   |                            |                       |   |                            |                     |    |                             |            |    |                             |                 |    |                             |              |    |                             |             |    |                             |                      |    |                             |                     |    |                             |                 |    |                             |                   |    |                             |                                |    |                             |        |    |                             |                          |
| 6    | Joint and bone infection                                                                         |                                                                              |                                                                                                                                                                                                                                                                                                                                                                                                                                                                                                                                                                                                                                                                                                                                                                                                                                                                                                                                                                                                                                                                                                                                                                                                                                                                                                                                                                                                                                                                                                                                                                                                                                                                                                                                                                       |   |                             |                    |                 |                            |                                          |   |                                        |           |                        |                            |                          |   |                            |             |       |                            |                           |   |                            |                       |   |                            |                       |   |                            |                     |    |                             |            |    |                             |                 |    |                             |              |    |                             |             |    |                             |                      |    |                             |                     |    |                             |                 |    |                             |                   |    |                             |                                |    |                             |        |    |                             |                          |
| 1295 | other_diagnosis_v2                                                                               | <p>Other 1</p> <p><i>If Not Applicable, please write NA</i></p>              | text                                                                                                                                                                                                                                                                                                                                                                                                                                                                                                                                                                                                                                                                                                                                                                                                                                                                                                                                                                                                                                                                                                                                                                                                                                                                                                                                                                                                                                                                                                                                                                                                                                                                                                                                                                  |   |                             |                    |                 |                            |                                          |   |                                        |           |                        |                            |                          |   |                            |             |       |                            |                           |   |                            |                       |   |                            |                       |   |                            |                     |    |                             |            |    |                             |                 |    |                             |              |    |                             |             |    |                             |                      |    |                             |                     |    |                             |                 |    |                             |                   |    |                             |                                |    |                             |        |    |                             |                          |
| 1296 | other_diagnosis2_d01_v2                                                                          | <p>Other 2</p> <p><i>If Not Applicable, please write NA</i></p>              | text                                                                                                                                                                                                                                                                                                                                                                                                                                                                                                                                                                                                                                                                                                                                                                                                                                                                                                                                                                                                                                                                                                                                                                                                                                                                                                                                                                                                                                                                                                                                                                                                                                                                                                                                                                  |   |                             |                    |                 |                            |                                          |   |                                        |           |                        |                            |                          |   |                            |             |       |                            |                           |   |                            |                       |   |                            |                       |   |                            |                     |    |                             |            |    |                             |                 |    |                             |              |    |                             |             |    |                             |                      |    |                             |                     |    |                             |                 |    |                             |                   |    |                             |                                |    |                             |        |    |                             |                          |

|                                                              |                                                                                |                                                                |                                                                                                                                                                                                                                                                                                                                                                                                                                                                                                                                                                                                                                                                                                                                                                                                                                                                                                                                                                                                                                                                                                                                                                                                                                                                                                                                                        |   |                       |               |             |                       |              |   |                       |          |     |                       |      |   |                       |                        |   |                       |               |   |                       |                |   |                       |            |   |                       |                   |    |                        |        |    |                        |                                                  |    |                        |                  |    |                        |                       |    |                        |        |    |                        |          |    |                        |                |    |                        |              |
|--------------------------------------------------------------|--------------------------------------------------------------------------------|----------------------------------------------------------------|--------------------------------------------------------------------------------------------------------------------------------------------------------------------------------------------------------------------------------------------------------------------------------------------------------------------------------------------------------------------------------------------------------------------------------------------------------------------------------------------------------------------------------------------------------------------------------------------------------------------------------------------------------------------------------------------------------------------------------------------------------------------------------------------------------------------------------------------------------------------------------------------------------------------------------------------------------------------------------------------------------------------------------------------------------------------------------------------------------------------------------------------------------------------------------------------------------------------------------------------------------------------------------------------------------------------------------------------------------|---|-----------------------|---------------|-------------|-----------------------|--------------|---|-----------------------|----------|-----|-----------------------|------|---|-----------------------|------------------------|---|-----------------------|---------------|---|-----------------------|----------------|---|-----------------------|------------|---|-----------------------|-------------------|----|------------------------|--------|----|------------------------|--------------------------------------------------|----|------------------------|------------------|----|------------------------|-----------------------|----|------------------------|--------|----|------------------------|----------|----|------------------------|----------------|----|------------------------|--------------|
| 1297                                                         | admission_diagnosis_qi_complete                                                | Section Header: <i>Form Status</i><br>Complete?                | dropdown<br><table border="1"> <tr><td>0</td><td>Incomplete</td></tr> <tr><td>1</td><td>Unverified</td></tr> <tr><td>2</td><td>Complete</td></tr> </table>                                                                                                                                                                                                                                                                                                                                                                                                                                                                                                                                                                                                                                                                                                                                                                                                                                                                                                                                                                                                                                                                                                                                                                                             | 0 | Incomplete            | 1             | Unverified  | 2                     | Complete     |   |                       |          |     |                       |      |   |                       |                        |   |                       |               |   |                       |                |   |                       |            |   |                       |                   |    |                        |        |    |                        |                                                  |    |                        |                  |    |                        |                       |    |                        |        |    |                        |          |    |                        |                |    |                        |              |
| 0                                                            | Incomplete                                                                     |                                                                |                                                                                                                                                                                                                                                                                                                                                                                                                                                                                                                                                                                                                                                                                                                                                                                                                                                                                                                                                                                                                                                                                                                                                                                                                                                                                                                                                        |   |                       |               |             |                       |              |   |                       |          |     |                       |      |   |                       |                        |   |                       |               |   |                       |                |   |                       |            |   |                       |                   |    |                        |        |    |                        |                                                  |    |                        |                  |    |                        |                       |    |                        |        |    |                        |          |    |                        |                |    |                        |              |
| 1                                                            | Unverified                                                                     |                                                                |                                                                                                                                                                                                                                                                                                                                                                                                                                                                                                                                                                                                                                                                                                                                                                                                                                                                                                                                                                                                                                                                                                                                                                                                                                                                                                                                                        |   |                       |               |             |                       |              |   |                       |          |     |                       |      |   |                       |                        |   |                       |               |   |                       |                |   |                       |            |   |                       |                   |    |                        |        |    |                        |                                                  |    |                        |                  |    |                        |                       |    |                        |        |    |                        |          |    |                        |                |    |                        |              |
| 2                                                            | Complete                                                                       |                                                                |                                                                                                                                                                                                                                                                                                                                                                                                                                                                                                                                                                                                                                                                                                                                                                                                                                                                                                                                                                                                                                                                                                                                                                                                                                                                                                                                                        |   |                       |               |             |                       |              |   |                       |          |     |                       |      |   |                       |                        |   |                       |               |   |                       |                |   |                       |            |   |                       |                   |    |                        |        |    |                        |                                                  |    |                        |                  |    |                        |                       |    |                        |        |    |                        |          |    |                        |                |    |                        |              |
| Instrument: <b>Medical History (Q1)</b> (medical_history_q1) |                                                                                |                                                                |                                                                                                                                                                                                                                                                                                                                                                                                                                                                                                                                                                                                                                                                                                                                                                                                                                                                                                                                                                                                                                                                                                                                                                                                                                                                                                                                                        |   |                       |               |             |                       |              |   |                       |          |     |                       |      |   |                       |                        |   |                       |               |   |                       |                |   |                       |            |   |                       |                   |    |                        |        |    |                        |                                                  |    |                        |                  |    |                        |                       |    |                        |        |    |                        |          |    |                        |                |    |                        |              |
| 1298                                                         | medical_history_v2                                                             | Medical History                                                | checkbox<br><table border="1"> <tr><td>1</td><td>medical_history_v2__1</td><td>Heart disease</td></tr> <tr><td>2</td><td>medical_history_v2__2</td><td>Hypertension</td></tr> <tr><td>3</td><td>medical_history_v2__3</td><td>Diabetes</td></tr> <tr><td>4</td><td>medical_history_v2__4</td><td>COPD</td></tr> <tr><td>5</td><td>medical_history_v2__5</td><td>Chronic Kidney Disease</td></tr> <tr><td>6</td><td>medical_history_v2__6</td><td>Liver disease</td></tr> <tr><td>7</td><td>medical_history_v2__7</td><td>Morbid obesity</td></tr> <tr><td>8</td><td>medical_history_v2__8</td><td>Malignancy</td></tr> <tr><td>9</td><td>medical_history_v2__9</td><td>Immunosuppression</td></tr> <tr><td>10</td><td>medical_history_v2__10</td><td>Asthma</td></tr> <tr><td>11</td><td>medical_history_v2__11</td><td>Known chronic hypoxia, hypercapnia, polycythemia</td></tr> <tr><td>12</td><td>medical_history_v2__12</td><td>Surgical history</td></tr> <tr><td>13</td><td>medical_history_v2__13</td><td>Rheumatologic disease</td></tr> <tr><td>14</td><td>medical_history_v2__14</td><td>Stroke</td></tr> <tr><td>15</td><td>medical_history_v2__15</td><td>Dementia</td></tr> <tr><td>16</td><td>medical_history_v2__16</td><td>Hypothyroidism</td></tr> <tr><td>17</td><td>medical_history_v2__17</td><td>Malnutrition</td></tr> </table> | 1 | medical_history_v2__1 | Heart disease | 2           | medical_history_v2__2 | Hypertension | 3 | medical_history_v2__3 | Diabetes | 4   | medical_history_v2__4 | COPD | 5 | medical_history_v2__5 | Chronic Kidney Disease | 6 | medical_history_v2__6 | Liver disease | 7 | medical_history_v2__7 | Morbid obesity | 8 | medical_history_v2__8 | Malignancy | 9 | medical_history_v2__9 | Immunosuppression | 10 | medical_history_v2__10 | Asthma | 11 | medical_history_v2__11 | Known chronic hypoxia, hypercapnia, polycythemia | 12 | medical_history_v2__12 | Surgical history | 13 | medical_history_v2__13 | Rheumatologic disease | 14 | medical_history_v2__14 | Stroke | 15 | medical_history_v2__15 | Dementia | 16 | medical_history_v2__16 | Hypothyroidism | 17 | medical_history_v2__17 | Malnutrition |
| 1                                                            | medical_history_v2__1                                                          | Heart disease                                                  |                                                                                                                                                                                                                                                                                                                                                                                                                                                                                                                                                                                                                                                                                                                                                                                                                                                                                                                                                                                                                                                                                                                                                                                                                                                                                                                                                        |   |                       |               |             |                       |              |   |                       |          |     |                       |      |   |                       |                        |   |                       |               |   |                       |                |   |                       |            |   |                       |                   |    |                        |        |    |                        |                                                  |    |                        |                  |    |                        |                       |    |                        |        |    |                        |          |    |                        |                |    |                        |              |
| 2                                                            | medical_history_v2__2                                                          | Hypertension                                                   |                                                                                                                                                                                                                                                                                                                                                                                                                                                                                                                                                                                                                                                                                                                                                                                                                                                                                                                                                                                                                                                                                                                                                                                                                                                                                                                                                        |   |                       |               |             |                       |              |   |                       |          |     |                       |      |   |                       |                        |   |                       |               |   |                       |                |   |                       |            |   |                       |                   |    |                        |        |    |                        |                                                  |    |                        |                  |    |                        |                       |    |                        |        |    |                        |          |    |                        |                |    |                        |              |
| 3                                                            | medical_history_v2__3                                                          | Diabetes                                                       |                                                                                                                                                                                                                                                                                                                                                                                                                                                                                                                                                                                                                                                                                                                                                                                                                                                                                                                                                                                                                                                                                                                                                                                                                                                                                                                                                        |   |                       |               |             |                       |              |   |                       |          |     |                       |      |   |                       |                        |   |                       |               |   |                       |                |   |                       |            |   |                       |                   |    |                        |        |    |                        |                                                  |    |                        |                  |    |                        |                       |    |                        |        |    |                        |          |    |                        |                |    |                        |              |
| 4                                                            | medical_history_v2__4                                                          | COPD                                                           |                                                                                                                                                                                                                                                                                                                                                                                                                                                                                                                                                                                                                                                                                                                                                                                                                                                                                                                                                                                                                                                                                                                                                                                                                                                                                                                                                        |   |                       |               |             |                       |              |   |                       |          |     |                       |      |   |                       |                        |   |                       |               |   |                       |                |   |                       |            |   |                       |                   |    |                        |        |    |                        |                                                  |    |                        |                  |    |                        |                       |    |                        |        |    |                        |          |    |                        |                |    |                        |              |
| 5                                                            | medical_history_v2__5                                                          | Chronic Kidney Disease                                         |                                                                                                                                                                                                                                                                                                                                                                                                                                                                                                                                                                                                                                                                                                                                                                                                                                                                                                                                                                                                                                                                                                                                                                                                                                                                                                                                                        |   |                       |               |             |                       |              |   |                       |          |     |                       |      |   |                       |                        |   |                       |               |   |                       |                |   |                       |            |   |                       |                   |    |                        |        |    |                        |                                                  |    |                        |                  |    |                        |                       |    |                        |        |    |                        |          |    |                        |                |    |                        |              |
| 6                                                            | medical_history_v2__6                                                          | Liver disease                                                  |                                                                                                                                                                                                                                                                                                                                                                                                                                                                                                                                                                                                                                                                                                                                                                                                                                                                                                                                                                                                                                                                                                                                                                                                                                                                                                                                                        |   |                       |               |             |                       |              |   |                       |          |     |                       |      |   |                       |                        |   |                       |               |   |                       |                |   |                       |            |   |                       |                   |    |                        |        |    |                        |                                                  |    |                        |                  |    |                        |                       |    |                        |        |    |                        |          |    |                        |                |    |                        |              |
| 7                                                            | medical_history_v2__7                                                          | Morbid obesity                                                 |                                                                                                                                                                                                                                                                                                                                                                                                                                                                                                                                                                                                                                                                                                                                                                                                                                                                                                                                                                                                                                                                                                                                                                                                                                                                                                                                                        |   |                       |               |             |                       |              |   |                       |          |     |                       |      |   |                       |                        |   |                       |               |   |                       |                |   |                       |            |   |                       |                   |    |                        |        |    |                        |                                                  |    |                        |                  |    |                        |                       |    |                        |        |    |                        |          |    |                        |                |    |                        |              |
| 8                                                            | medical_history_v2__8                                                          | Malignancy                                                     |                                                                                                                                                                                                                                                                                                                                                                                                                                                                                                                                                                                                                                                                                                                                                                                                                                                                                                                                                                                                                                                                                                                                                                                                                                                                                                                                                        |   |                       |               |             |                       |              |   |                       |          |     |                       |      |   |                       |                        |   |                       |               |   |                       |                |   |                       |            |   |                       |                   |    |                        |        |    |                        |                                                  |    |                        |                  |    |                        |                       |    |                        |        |    |                        |          |    |                        |                |    |                        |              |
| 9                                                            | medical_history_v2__9                                                          | Immunosuppression                                              |                                                                                                                                                                                                                                                                                                                                                                                                                                                                                                                                                                                                                                                                                                                                                                                                                                                                                                                                                                                                                                                                                                                                                                                                                                                                                                                                                        |   |                       |               |             |                       |              |   |                       |          |     |                       |      |   |                       |                        |   |                       |               |   |                       |                |   |                       |            |   |                       |                   |    |                        |        |    |                        |                                                  |    |                        |                  |    |                        |                       |    |                        |        |    |                        |          |    |                        |                |    |                        |              |
| 10                                                           | medical_history_v2__10                                                         | Asthma                                                         |                                                                                                                                                                                                                                                                                                                                                                                                                                                                                                                                                                                                                                                                                                                                                                                                                                                                                                                                                                                                                                                                                                                                                                                                                                                                                                                                                        |   |                       |               |             |                       |              |   |                       |          |     |                       |      |   |                       |                        |   |                       |               |   |                       |                |   |                       |            |   |                       |                   |    |                        |        |    |                        |                                                  |    |                        |                  |    |                        |                       |    |                        |        |    |                        |          |    |                        |                |    |                        |              |
| 11                                                           | medical_history_v2__11                                                         | Known chronic hypoxia, hypercapnia, polycythemia               |                                                                                                                                                                                                                                                                                                                                                                                                                                                                                                                                                                                                                                                                                                                                                                                                                                                                                                                                                                                                                                                                                                                                                                                                                                                                                                                                                        |   |                       |               |             |                       |              |   |                       |          |     |                       |      |   |                       |                        |   |                       |               |   |                       |                |   |                       |            |   |                       |                   |    |                        |        |    |                        |                                                  |    |                        |                  |    |                        |                       |    |                        |        |    |                        |          |    |                        |                |    |                        |              |
| 12                                                           | medical_history_v2__12                                                         | Surgical history                                               |                                                                                                                                                                                                                                                                                                                                                                                                                                                                                                                                                                                                                                                                                                                                                                                                                                                                                                                                                                                                                                                                                                                                                                                                                                                                                                                                                        |   |                       |               |             |                       |              |   |                       |          |     |                       |      |   |                       |                        |   |                       |               |   |                       |                |   |                       |            |   |                       |                   |    |                        |        |    |                        |                                                  |    |                        |                  |    |                        |                       |    |                        |        |    |                        |          |    |                        |                |    |                        |              |
| 13                                                           | medical_history_v2__13                                                         | Rheumatologic disease                                          |                                                                                                                                                                                                                                                                                                                                                                                                                                                                                                                                                                                                                                                                                                                                                                                                                                                                                                                                                                                                                                                                                                                                                                                                                                                                                                                                                        |   |                       |               |             |                       |              |   |                       |          |     |                       |      |   |                       |                        |   |                       |               |   |                       |                |   |                       |            |   |                       |                   |    |                        |        |    |                        |                                                  |    |                        |                  |    |                        |                       |    |                        |        |    |                        |          |    |                        |                |    |                        |              |
| 14                                                           | medical_history_v2__14                                                         | Stroke                                                         |                                                                                                                                                                                                                                                                                                                                                                                                                                                                                                                                                                                                                                                                                                                                                                                                                                                                                                                                                                                                                                                                                                                                                                                                                                                                                                                                                        |   |                       |               |             |                       |              |   |                       |          |     |                       |      |   |                       |                        |   |                       |               |   |                       |                |   |                       |            |   |                       |                   |    |                        |        |    |                        |                                                  |    |                        |                  |    |                        |                       |    |                        |        |    |                        |          |    |                        |                |    |                        |              |
| 15                                                           | medical_history_v2__15                                                         | Dementia                                                       |                                                                                                                                                                                                                                                                                                                                                                                                                                                                                                                                                                                                                                                                                                                                                                                                                                                                                                                                                                                                                                                                                                                                                                                                                                                                                                                                                        |   |                       |               |             |                       |              |   |                       |          |     |                       |      |   |                       |                        |   |                       |               |   |                       |                |   |                       |            |   |                       |                   |    |                        |        |    |                        |                                                  |    |                        |                  |    |                        |                       |    |                        |        |    |                        |          |    |                        |                |    |                        |              |
| 16                                                           | medical_history_v2__16                                                         | Hypothyroidism                                                 |                                                                                                                                                                                                                                                                                                                                                                                                                                                                                                                                                                                                                                                                                                                                                                                                                                                                                                                                                                                                                                                                                                                                                                                                                                                                                                                                                        |   |                       |               |             |                       |              |   |                       |          |     |                       |      |   |                       |                        |   |                       |               |   |                       |                |   |                       |            |   |                       |                   |    |                        |        |    |                        |                                                  |    |                        |                  |    |                        |                       |    |                        |        |    |                        |          |    |                        |                |    |                        |              |
| 17                                                           | medical_history_v2__17                                                         | Malnutrition                                                   |                                                                                                                                                                                                                                                                                                                                                                                                                                                                                                                                                                                                                                                                                                                                                                                                                                                                                                                                                                                                                                                                                                                                                                                                                                                                                                                                                        |   |                       |               |             |                       |              |   |                       |          |     |                       |      |   |                       |                        |   |                       |               |   |                       |                |   |                       |            |   |                       |                   |    |                        |        |    |                        |                                                  |    |                        |                  |    |                        |                       |    |                        |        |    |                        |          |    |                        |                |    |                        |              |
| 1299                                                         | ckd_therapy_v2<br>Show the field ONLY if:<br>[medical_history_v2(5)] = '1'     | Chronic renal replacement therapy                              | dropdown<br><table border="1"> <tr><td>1</td><td>Yes</td></tr> <tr><td>0</td><td>No</td></tr> </table>                                                                                                                                                                                                                                                                                                                                                                                                                                                                                                                                                                                                                                                                                                                                                                                                                                                                                                                                                                                                                                                                                                                                                                                                                                                 | 1 | Yes                   | 0             | No          |                       |              |   |                       |          |     |                       |      |   |                       |                        |   |                       |               |   |                       |                |   |                       |            |   |                       |                   |    |                        |        |    |                        |                                                  |    |                        |                  |    |                        |                       |    |                        |        |    |                        |          |    |                        |                |    |                        |              |
| 1                                                            | Yes                                                                            |                                                                |                                                                                                                                                                                                                                                                                                                                                                                                                                                                                                                                                                                                                                                                                                                                                                                                                                                                                                                                                                                                                                                                                                                                                                                                                                                                                                                                                        |   |                       |               |             |                       |              |   |                       |          |     |                       |      |   |                       |                        |   |                       |               |   |                       |                |   |                       |            |   |                       |                   |    |                        |        |    |                        |                                                  |    |                        |                  |    |                        |                       |    |                        |        |    |                        |          |    |                        |                |    |                        |              |
| 0                                                            | No                                                                             |                                                                |                                                                                                                                                                                                                                                                                                                                                                                                                                                                                                                                                                                                                                                                                                                                                                                                                                                                                                                                                                                                                                                                                                                                                                                                                                                                                                                                                        |   |                       |               |             |                       |              |   |                       |          |     |                       |      |   |                       |                        |   |                       |               |   |                       |                |   |                       |            |   |                       |                   |    |                        |        |    |                        |                                                  |    |                        |                  |    |                        |                       |    |                        |        |    |                        |          |    |                        |                |    |                        |              |
| 1300                                                         | type_malignancy_v2<br>Show the field ONLY if:<br>[medical_history_v2(8)] = '1' | Type of malignancy                                             | dropdown<br><table border="1"> <tr><td>1</td><td>Solid</td></tr> <tr><td>2</td><td>Hematologic</td></tr> </table>                                                                                                                                                                                                                                                                                                                                                                                                                                                                                                                                                                                                                                                                                                                                                                                                                                                                                                                                                                                                                                                                                                                                                                                                                                      | 1 | Solid                 | 2             | Hematologic |                       |              |   |                       |          |     |                       |      |   |                       |                        |   |                       |               |   |                       |                |   |                       |            |   |                       |                   |    |                        |        |    |                        |                                                  |    |                        |                  |    |                        |                       |    |                        |        |    |                        |          |    |                        |                |    |                        |              |
| 1                                                            | Solid                                                                          |                                                                |                                                                                                                                                                                                                                                                                                                                                                                                                                                                                                                                                                                                                                                                                                                                                                                                                                                                                                                                                                                                                                                                                                                                                                                                                                                                                                                                                        |   |                       |               |             |                       |              |   |                       |          |     |                       |      |   |                       |                        |   |                       |               |   |                       |                |   |                       |            |   |                       |                   |    |                        |        |    |                        |                                                  |    |                        |                  |    |                        |                       |    |                        |        |    |                        |          |    |                        |                |    |                        |              |
| 2                                                            | Hematologic                                                                    |                                                                |                                                                                                                                                                                                                                                                                                                                                                                                                                                                                                                                                                                                                                                                                                                                                                                                                                                                                                                                                                                                                                                                                                                                                                                                                                                                                                                                                        |   |                       |               |             |                       |              |   |                       |          |     |                       |      |   |                       |                        |   |                       |               |   |                       |                |   |                       |            |   |                       |                   |    |                        |        |    |                        |                                                  |    |                        |                  |    |                        |                       |    |                        |        |    |                        |          |    |                        |                |    |                        |              |
| 1301                                                         | hemato_malig_v2<br>Show the field ONLY if:<br>[type_malignancy_v2]='2'         | Type of Hematologic Malignancy                                 | radio<br><table border="1"> <tr><td>1</td><td>Leukemia</td></tr> <tr><td>2</td><td>Lymphoma</td></tr> <tr><td>3</td><td>Myeloma</td></tr> <tr><td>4</td><td>Other</td></tr> </table>                                                                                                                                                                                                                                                                                                                                                                                                                                                                                                                                                                                                                                                                                                                                                                                                                                                                                                                                                                                                                                                                                                                                                                   | 1 | Leukemia              | 2             | Lymphoma    | 3                     | Myeloma      | 4 | Other                 |          |     |                       |      |   |                       |                        |   |                       |               |   |                       |                |   |                       |            |   |                       |                   |    |                        |        |    |                        |                                                  |    |                        |                  |    |                        |                       |    |                        |        |    |                        |          |    |                        |                |    |                        |              |
| 1                                                            | Leukemia                                                                       |                                                                |                                                                                                                                                                                                                                                                                                                                                                                                                                                                                                                                                                                                                                                                                                                                                                                                                                                                                                                                                                                                                                                                                                                                                                                                                                                                                                                                                        |   |                       |               |             |                       |              |   |                       |          |     |                       |      |   |                       |                        |   |                       |               |   |                       |                |   |                       |            |   |                       |                   |    |                        |        |    |                        |                                                  |    |                        |                  |    |                        |                       |    |                        |        |    |                        |          |    |                        |                |    |                        |              |
| 2                                                            | Lymphoma                                                                       |                                                                |                                                                                                                                                                                                                                                                                                                                                                                                                                                                                                                                                                                                                                                                                                                                                                                                                                                                                                                                                                                                                                                                                                                                                                                                                                                                                                                                                        |   |                       |               |             |                       |              |   |                       |          |     |                       |      |   |                       |                        |   |                       |               |   |                       |                |   |                       |            |   |                       |                   |    |                        |        |    |                        |                                                  |    |                        |                  |    |                        |                       |    |                        |        |    |                        |          |    |                        |                |    |                        |              |
| 3                                                            | Myeloma                                                                        |                                                                |                                                                                                                                                                                                                                                                                                                                                                                                                                                                                                                                                                                                                                                                                                                                                                                                                                                                                                                                                                                                                                                                                                                                                                                                                                                                                                                                                        |   |                       |               |             |                       |              |   |                       |          |     |                       |      |   |                       |                        |   |                       |               |   |                       |                |   |                       |            |   |                       |                   |    |                        |        |    |                        |                                                  |    |                        |                  |    |                        |                       |    |                        |        |    |                        |          |    |                        |                |    |                        |              |
| 4                                                            | Other                                                                          |                                                                |                                                                                                                                                                                                                                                                                                                                                                                                                                                                                                                                                                                                                                                                                                                                                                                                                                                                                                                                                                                                                                                                                                                                                                                                                                                                                                                                                        |   |                       |               |             |                       |              |   |                       |          |     |                       |      |   |                       |                        |   |                       |               |   |                       |                |   |                       |            |   |                       |                   |    |                        |        |    |                        |                                                  |    |                        |                  |    |                        |                       |    |                        |        |    |                        |          |    |                        |                |    |                        |              |
| 1302                                                         | type_leukemia_v2<br>Show the field ONLY if:<br>[hemato_malig_v2] = '1'         | What type of Leukemia?                                         | radio<br><table border="1"> <tr><td>1</td><td>AML</td></tr> <tr><td>2</td><td>MDS</td></tr> <tr><td>3</td><td>ALL</td></tr> <tr><td>4</td><td>CLL</td></tr> <tr><td>5</td><td>CML</td></tr> </table>                                                                                                                                                                                                                                                                                                                                                                                                                                                                                                                                                                                                                                                                                                                                                                                                                                                                                                                                                                                                                                                                                                                                                   | 1 | AML                   | 2             | MDS         | 3                     | ALL          | 4 | CLL                   | 5        | CML |                       |      |   |                       |                        |   |                       |               |   |                       |                |   |                       |            |   |                       |                   |    |                        |        |    |                        |                                                  |    |                        |                  |    |                        |                       |    |                        |        |    |                        |          |    |                        |                |    |                        |              |
| 1                                                            | AML                                                                            |                                                                |                                                                                                                                                                                                                                                                                                                                                                                                                                                                                                                                                                                                                                                                                                                                                                                                                                                                                                                                                                                                                                                                                                                                                                                                                                                                                                                                                        |   |                       |               |             |                       |              |   |                       |          |     |                       |      |   |                       |                        |   |                       |               |   |                       |                |   |                       |            |   |                       |                   |    |                        |        |    |                        |                                                  |    |                        |                  |    |                        |                       |    |                        |        |    |                        |          |    |                        |                |    |                        |              |
| 2                                                            | MDS                                                                            |                                                                |                                                                                                                                                                                                                                                                                                                                                                                                                                                                                                                                                                                                                                                                                                                                                                                                                                                                                                                                                                                                                                                                                                                                                                                                                                                                                                                                                        |   |                       |               |             |                       |              |   |                       |          |     |                       |      |   |                       |                        |   |                       |               |   |                       |                |   |                       |            |   |                       |                   |    |                        |        |    |                        |                                                  |    |                        |                  |    |                        |                       |    |                        |        |    |                        |          |    |                        |                |    |                        |              |
| 3                                                            | ALL                                                                            |                                                                |                                                                                                                                                                                                                                                                                                                                                                                                                                                                                                                                                                                                                                                                                                                                                                                                                                                                                                                                                                                                                                                                                                                                                                                                                                                                                                                                                        |   |                       |               |             |                       |              |   |                       |          |     |                       |      |   |                       |                        |   |                       |               |   |                       |                |   |                       |            |   |                       |                   |    |                        |        |    |                        |                                                  |    |                        |                  |    |                        |                       |    |                        |        |    |                        |          |    |                        |                |    |                        |              |
| 4                                                            | CLL                                                                            |                                                                |                                                                                                                                                                                                                                                                                                                                                                                                                                                                                                                                                                                                                                                                                                                                                                                                                                                                                                                                                                                                                                                                                                                                                                                                                                                                                                                                                        |   |                       |               |             |                       |              |   |                       |          |     |                       |      |   |                       |                        |   |                       |               |   |                       |                |   |                       |            |   |                       |                   |    |                        |        |    |                        |                                                  |    |                        |                  |    |                        |                       |    |                        |        |    |                        |          |    |                        |                |    |                        |              |
| 5                                                            | CML                                                                            |                                                                |                                                                                                                                                                                                                                                                                                                                                                                                                                                                                                                                                                                                                                                                                                                                                                                                                                                                                                                                                                                                                                                                                                                                                                                                                                                                                                                                                        |   |                       |               |             |                       |              |   |                       |          |     |                       |      |   |                       |                        |   |                       |               |   |                       |                |   |                       |            |   |                       |                   |    |                        |        |    |                        |                                                  |    |                        |                  |    |                        |                       |    |                        |        |    |                        |          |    |                        |                |    |                        |              |
| 1303                                                         | cancer_type_v2<br>Show the field ONLY if:<br>[type_malignancy_v2] = '1'        | Type of Cancer                                                 | text                                                                                                                                                                                                                                                                                                                                                                                                                                                                                                                                                                                                                                                                                                                                                                                                                                                                                                                                                                                                                                                                                                                                                                                                                                                                                                                                                   |   |                       |               |             |                       |              |   |                       |          |     |                       |      |   |                       |                        |   |                       |               |   |                       |                |   |                       |            |   |                       |                   |    |                        |        |    |                        |                                                  |    |                        |                  |    |                        |                       |    |                        |        |    |                        |          |    |                        |                |    |                        |              |
| 1304                                                         | state_cancer_v2<br>Show the field ONLY if:<br>[medical_history_v2(8)] = '1'    | State                                                          | dropdown<br><table border="1"> <tr><td>1</td><td>Active</td></tr> <tr><td>2</td><td>Remission</td></tr> </table>                                                                                                                                                                                                                                                                                                                                                                                                                                                                                                                                                                                                                                                                                                                                                                                                                                                                                                                                                                                                                                                                                                                                                                                                                                       | 1 | Active                | 2             | Remission   |                       |              |   |                       |          |     |                       |      |   |                       |                        |   |                       |               |   |                       |                |   |                       |            |   |                       |                   |    |                        |        |    |                        |                                                  |    |                        |                  |    |                        |                       |    |                        |        |    |                        |          |    |                        |                |    |                        |              |
| 1                                                            | Active                                                                         |                                                                |                                                                                                                                                                                                                                                                                                                                                                                                                                                                                                                                                                                                                                                                                                                                                                                                                                                                                                                                                                                                                                                                                                                                                                                                                                                                                                                                                        |   |                       |               |             |                       |              |   |                       |          |     |                       |      |   |                       |                        |   |                       |               |   |                       |                |   |                       |            |   |                       |                   |    |                        |        |    |                        |                                                  |    |                        |                  |    |                        |                       |    |                        |        |    |                        |          |    |                        |                |    |                        |              |
| 2                                                            | Remission                                                                      |                                                                |                                                                                                                                                                                                                                                                                                                                                                                                                                                                                                                                                                                                                                                                                                                                                                                                                                                                                                                                                                                                                                                                                                                                                                                                                                                                                                                                                        |   |                       |               |             |                       |              |   |                       |          |     |                       |      |   |                       |                        |   |                       |               |   |                       |                |   |                       |            |   |                       |                   |    |                        |        |    |                        |                                                  |    |                        |                  |    |                        |                       |    |                        |        |    |                        |          |    |                        |                |    |                        |              |
| 1305                                                         | chemotherapy_v2<br>Show the field ONLY if:<br>[medical_history_v2(8)] = '1'    | Current chemotherapy or chemotherapy within the last 3 months? | dropdown<br><table border="1"> <tr><td>0</td><td>No</td></tr> <tr><td>1</td><td>Yes</td></tr> </table>                                                                                                                                                                                                                                                                                                                                                                                                                                                                                                                                                                                                                                                                                                                                                                                                                                                                                                                                                                                                                                                                                                                                                                                                                                                 | 0 | No                    | 1             | Yes         |                       |              |   |                       |          |     |                       |      |   |                       |                        |   |                       |               |   |                       |                |   |                       |            |   |                       |                   |    |                        |        |    |                        |                                                  |    |                        |                  |    |                        |                       |    |                        |        |    |                        |          |    |                        |                |    |                        |              |
| 0                                                            | No                                                                             |                                                                |                                                                                                                                                                                                                                                                                                                                                                                                                                                                                                                                                                                                                                                                                                                                                                                                                                                                                                                                                                                                                                                                                                                                                                                                                                                                                                                                                        |   |                       |               |             |                       |              |   |                       |          |     |                       |      |   |                       |                        |   |                       |               |   |                       |                |   |                       |            |   |                       |                   |    |                        |        |    |                        |                                                  |    |                        |                  |    |                        |                       |    |                        |        |    |                        |          |    |                        |                |    |                        |              |
| 1                                                            | Yes                                                                            |                                                                |                                                                                                                                                                                                                                                                                                                                                                                                                                                                                                                                                                                                                                                                                                                                                                                                                                                                                                                                                                                                                                                                                                                                                                                                                                                                                                                                                        |   |                       |               |             |                       |              |   |                       |          |     |                       |      |   |                       |                        |   |                       |               |   |                       |                |   |                       |            |   |                       |                   |    |                        |        |    |                        |                                                  |    |                        |                  |    |                        |                       |    |                        |        |    |                        |          |    |                        |                |    |                        |              |

|      |                                                                                        |                                                                |                                                                                                                                                                                                                                                                                                                                                                                                                                                                                                                                                                                                                                                                                                                                                                                                                                                                                                                                                                                                                                                                                                                                                                                                                                                                                                                                                                                                                                                                                                                                                                                                                                                                                                                                                                                                                                                                                                                                                                                                                                                                                                                                 |   |                           |                                              |            |                           |                                                                |   |                           |             |   |                           |                             |   |                           |                                                          |   |                           |                        |   |                           |                    |   |                           |                                           |   |                           |                                                 |    |                            |                                                              |
|------|----------------------------------------------------------------------------------------|----------------------------------------------------------------|---------------------------------------------------------------------------------------------------------------------------------------------------------------------------------------------------------------------------------------------------------------------------------------------------------------------------------------------------------------------------------------------------------------------------------------------------------------------------------------------------------------------------------------------------------------------------------------------------------------------------------------------------------------------------------------------------------------------------------------------------------------------------------------------------------------------------------------------------------------------------------------------------------------------------------------------------------------------------------------------------------------------------------------------------------------------------------------------------------------------------------------------------------------------------------------------------------------------------------------------------------------------------------------------------------------------------------------------------------------------------------------------------------------------------------------------------------------------------------------------------------------------------------------------------------------------------------------------------------------------------------------------------------------------------------------------------------------------------------------------------------------------------------------------------------------------------------------------------------------------------------------------------------------------------------------------------------------------------------------------------------------------------------------------------------------------------------------------------------------------------------|---|---------------------------|----------------------------------------------|------------|---------------------------|----------------------------------------------------------------|---|---------------------------|-------------|---|---------------------------|-----------------------------|---|---------------------------|----------------------------------------------------------|---|---------------------------|------------------------|---|---------------------------|--------------------|---|---------------------------|-------------------------------------------|---|---------------------------|-------------------------------------------------|----|----------------------------|--------------------------------------------------------------|
| 1306 | immunosuppression_v2<br>Show the field ONLY if:<br>[medical_history_v2(9)] = '1'       | Immunosuppression                                              | checkbox<br><table border="1"> <tr> <td data-bbox="1040 107 1068 142">1</td> <td data-bbox="1068 107 1317 142">immunosuppression_v2__1</td> <td data-bbox="1317 107 1533 142">Prednisone or equivalent = or &gt; 0.3 mg/Kg/d?</td> </tr> <tr> <td data-bbox="1040 195 1068 231">2</td> <td data-bbox="1068 195 1317 231">immunosuppression_v2__2</td> <td data-bbox="1317 195 1533 231">Current chemotherapy or chemotherapy within the last 3 months?</td> </tr> <tr> <td data-bbox="1040 283 1068 319">3</td> <td data-bbox="1068 283 1317 319">immunosuppression_v2__3</td> <td data-bbox="1317 283 1533 319">Neutropenia</td> </tr> <tr> <td data-bbox="1040 371 1068 407">4</td> <td data-bbox="1068 371 1317 407">immunosuppression_v2__4</td> <td data-bbox="1317 371 1533 407">Solid organ transplantation</td> </tr> <tr> <td data-bbox="1040 459 1068 495">5</td> <td data-bbox="1068 459 1317 495">immunosuppression_v2__5</td> <td data-bbox="1317 459 1533 495">Rheumatologic disease in treatment with immunosupresors.</td> </tr> <tr> <td data-bbox="1040 548 1068 583">6</td> <td data-bbox="1068 548 1317 583">immunosuppression_v2__6</td> <td data-bbox="1317 548 1533 583">Bone Marrow transplant</td> </tr> <tr> <td data-bbox="1040 636 1068 672">7</td> <td data-bbox="1068 636 1317 672">immunosuppression_v2__7</td> <td data-bbox="1317 636 1533 672">HIV with CD4 &lt; 500</td> </tr> <tr> <td data-bbox="1040 724 1068 760">8</td> <td data-bbox="1068 724 1317 760">immunosuppression_v2__8</td> <td data-bbox="1317 724 1533 760">Leukemia/Myeloma within the last 6 months</td> </tr> <tr> <td data-bbox="1040 812 1068 848">9</td> <td data-bbox="1068 812 1317 848">immunosuppression_v2__9</td> <td data-bbox="1317 812 1533 848">Non-Hodgkin's Lymphoma within the last 6 months</td> </tr> <tr> <td data-bbox="1040 900 1068 936">10</td> <td data-bbox="1068 900 1317 936">immunosuppression_v2__10</td> <td data-bbox="1317 900 1533 936">Solid tumor with metastatic disease within the last 6 months</td> </tr> </table>                                                               | 1 | immunosuppression_v2__1   | Prednisone or equivalent = or > 0.3 mg/Kg/d? | 2          | immunosuppression_v2__2   | Current chemotherapy or chemotherapy within the last 3 months? | 3 | immunosuppression_v2__3   | Neutropenia | 4 | immunosuppression_v2__4   | Solid organ transplantation | 5 | immunosuppression_v2__5   | Rheumatologic disease in treatment with immunosupresors. | 6 | immunosuppression_v2__6   | Bone Marrow transplant | 7 | immunosuppression_v2__7   | HIV with CD4 < 500 | 8 | immunosuppression_v2__8   | Leukemia/Myeloma within the last 6 months | 9 | immunosuppression_v2__9   | Non-Hodgkin's Lymphoma within the last 6 months | 10 | immunosuppression_v2__10   | Solid tumor with metastatic disease within the last 6 months |
| 1    | immunosuppression_v2__1                                                                | Prednisone or equivalent = or > 0.3 mg/Kg/d?                   |                                                                                                                                                                                                                                                                                                                                                                                                                                                                                                                                                                                                                                                                                                                                                                                                                                                                                                                                                                                                                                                                                                                                                                                                                                                                                                                                                                                                                                                                                                                                                                                                                                                                                                                                                                                                                                                                                                                                                                                                                                                                                                                                 |   |                           |                                              |            |                           |                                                                |   |                           |             |   |                           |                             |   |                           |                                                          |   |                           |                        |   |                           |                    |   |                           |                                           |   |                           |                                                 |    |                            |                                                              |
| 2    | immunosuppression_v2__2                                                                | Current chemotherapy or chemotherapy within the last 3 months? |                                                                                                                                                                                                                                                                                                                                                                                                                                                                                                                                                                                                                                                                                                                                                                                                                                                                                                                                                                                                                                                                                                                                                                                                                                                                                                                                                                                                                                                                                                                                                                                                                                                                                                                                                                                                                                                                                                                                                                                                                                                                                                                                 |   |                           |                                              |            |                           |                                                                |   |                           |             |   |                           |                             |   |                           |                                                          |   |                           |                        |   |                           |                    |   |                           |                                           |   |                           |                                                 |    |                            |                                                              |
| 3    | immunosuppression_v2__3                                                                | Neutropenia                                                    |                                                                                                                                                                                                                                                                                                                                                                                                                                                                                                                                                                                                                                                                                                                                                                                                                                                                                                                                                                                                                                                                                                                                                                                                                                                                                                                                                                                                                                                                                                                                                                                                                                                                                                                                                                                                                                                                                                                                                                                                                                                                                                                                 |   |                           |                                              |            |                           |                                                                |   |                           |             |   |                           |                             |   |                           |                                                          |   |                           |                        |   |                           |                    |   |                           |                                           |   |                           |                                                 |    |                            |                                                              |
| 4    | immunosuppression_v2__4                                                                | Solid organ transplantation                                    |                                                                                                                                                                                                                                                                                                                                                                                                                                                                                                                                                                                                                                                                                                                                                                                                                                                                                                                                                                                                                                                                                                                                                                                                                                                                                                                                                                                                                                                                                                                                                                                                                                                                                                                                                                                                                                                                                                                                                                                                                                                                                                                                 |   |                           |                                              |            |                           |                                                                |   |                           |             |   |                           |                             |   |                           |                                                          |   |                           |                        |   |                           |                    |   |                           |                                           |   |                           |                                                 |    |                            |                                                              |
| 5    | immunosuppression_v2__5                                                                | Rheumatologic disease in treatment with immunosupresors.       |                                                                                                                                                                                                                                                                                                                                                                                                                                                                                                                                                                                                                                                                                                                                                                                                                                                                                                                                                                                                                                                                                                                                                                                                                                                                                                                                                                                                                                                                                                                                                                                                                                                                                                                                                                                                                                                                                                                                                                                                                                                                                                                                 |   |                           |                                              |            |                           |                                                                |   |                           |             |   |                           |                             |   |                           |                                                          |   |                           |                        |   |                           |                    |   |                           |                                           |   |                           |                                                 |    |                            |                                                              |
| 6    | immunosuppression_v2__6                                                                | Bone Marrow transplant                                         |                                                                                                                                                                                                                                                                                                                                                                                                                                                                                                                                                                                                                                                                                                                                                                                                                                                                                                                                                                                                                                                                                                                                                                                                                                                                                                                                                                                                                                                                                                                                                                                                                                                                                                                                                                                                                                                                                                                                                                                                                                                                                                                                 |   |                           |                                              |            |                           |                                                                |   |                           |             |   |                           |                             |   |                           |                                                          |   |                           |                        |   |                           |                    |   |                           |                                           |   |                           |                                                 |    |                            |                                                              |
| 7    | immunosuppression_v2__7                                                                | HIV with CD4 < 500                                             |                                                                                                                                                                                                                                                                                                                                                                                                                                                                                                                                                                                                                                                                                                                                                                                                                                                                                                                                                                                                                                                                                                                                                                                                                                                                                                                                                                                                                                                                                                                                                                                                                                                                                                                                                                                                                                                                                                                                                                                                                                                                                                                                 |   |                           |                                              |            |                           |                                                                |   |                           |             |   |                           |                             |   |                           |                                                          |   |                           |                        |   |                           |                    |   |                           |                                           |   |                           |                                                 |    |                            |                                                              |
| 8    | immunosuppression_v2__8                                                                | Leukemia/Myeloma within the last 6 months                      |                                                                                                                                                                                                                                                                                                                                                                                                                                                                                                                                                                                                                                                                                                                                                                                                                                                                                                                                                                                                                                                                                                                                                                                                                                                                                                                                                                                                                                                                                                                                                                                                                                                                                                                                                                                                                                                                                                                                                                                                                                                                                                                                 |   |                           |                                              |            |                           |                                                                |   |                           |             |   |                           |                             |   |                           |                                                          |   |                           |                        |   |                           |                    |   |                           |                                           |   |                           |                                                 |    |                            |                                                              |
| 9    | immunosuppression_v2__9                                                                | Non-Hodgkin's Lymphoma within the last 6 months                |                                                                                                                                                                                                                                                                                                                                                                                                                                                                                                                                                                                                                                                                                                                                                                                                                                                                                                                                                                                                                                                                                                                                                                                                                                                                                                                                                                                                                                                                                                                                                                                                                                                                                                                                                                                                                                                                                                                                                                                                                                                                                                                                 |   |                           |                                              |            |                           |                                                                |   |                           |             |   |                           |                             |   |                           |                                                          |   |                           |                        |   |                           |                    |   |                           |                                           |   |                           |                                                 |    |                            |                                                              |
| 10   | immunosuppression_v2__10                                                               | Solid tumor with metastatic disease within the last 6 months   |                                                                                                                                                                                                                                                                                                                                                                                                                                                                                                                                                                                                                                                                                                                                                                                                                                                                                                                                                                                                                                                                                                                                                                                                                                                                                                                                                                                                                                                                                                                                                                                                                                                                                                                                                                                                                                                                                                                                                                                                                                                                                                                                 |   |                           |                                              |            |                           |                                                                |   |                           |             |   |                           |                             |   |                           |                                                          |   |                           |                        |   |                           |                    |   |                           |                                           |   |                           |                                                 |    |                            |                                                              |
| 1307 | immunosuppression_2_v2<br>Show the field ONLY if:<br>[medical_history_v2(9)] = '1'     | Immunosuppression                                              | checkbox<br><table border="1"> <tr> <td data-bbox="1040 787 1068 823">1</td> <td data-bbox="1068 787 1317 823">immunosuppression_2_v2__1</td> <td data-bbox="1317 787 1533 823">Prednisone or equivalent = or &gt; 0.3 mg/Kg/d?</td> </tr> <tr> <td data-bbox="1040 875 1068 911">2</td> <td data-bbox="1068 875 1317 911">immunosuppression_2_v2__2</td> <td data-bbox="1317 875 1533 911">Current chemotherapy or chemotherapy within the last 3 months?</td> </tr> <tr> <td data-bbox="1040 963 1068 999">3</td> <td data-bbox="1068 963 1317 999">immunosuppression_2_v2__3</td> <td data-bbox="1317 963 1533 999">Neutropenia</td> </tr> <tr> <td data-bbox="1040 1052 1068 1087">4</td> <td data-bbox="1068 1052 1317 1087">immunosuppression_2_v2__4</td> <td data-bbox="1317 1052 1533 1087">Solid organ transplantation</td> </tr> <tr> <td data-bbox="1040 1140 1068 1176">5</td> <td data-bbox="1068 1140 1317 1176">immunosuppression_2_v2__5</td> <td data-bbox="1317 1140 1533 1176">Rheumatologic disease in treatment with immunosupresors.</td> </tr> <tr> <td data-bbox="1040 1228 1068 1264">6</td> <td data-bbox="1068 1228 1317 1264">immunosuppression_2_v2__6</td> <td data-bbox="1317 1228 1533 1264">Bone Marrow transplant</td> </tr> <tr> <td data-bbox="1040 1316 1068 1352">7</td> <td data-bbox="1068 1316 1317 1352">immunosuppression_2_v2__7</td> <td data-bbox="1317 1316 1533 1352">HIV with CD4 &lt; 500</td> </tr> <tr> <td data-bbox="1040 1404 1068 1440">8</td> <td data-bbox="1068 1404 1317 1440">immunosuppression_2_v2__8</td> <td data-bbox="1317 1404 1533 1440">Leukemia/Myeloma within the last 6 months</td> </tr> <tr> <td data-bbox="1040 1493 1068 1528">9</td> <td data-bbox="1068 1493 1317 1528">immunosuppression_2_v2__9</td> <td data-bbox="1317 1493 1533 1528">Non-Hodgkin's Lymphoma within the last 6 months</td> </tr> <tr> <td data-bbox="1040 1581 1068 1617">10</td> <td data-bbox="1068 1581 1317 1617">immunosuppression_2_v2__10</td> <td data-bbox="1317 1581 1533 1617">Solid tumor with metastatic disease within the last 6 months</td> </tr> </table> | 1 | immunosuppression_2_v2__1 | Prednisone or equivalent = or > 0.3 mg/Kg/d? | 2          | immunosuppression_2_v2__2 | Current chemotherapy or chemotherapy within the last 3 months? | 3 | immunosuppression_2_v2__3 | Neutropenia | 4 | immunosuppression_2_v2__4 | Solid organ transplantation | 5 | immunosuppression_2_v2__5 | Rheumatologic disease in treatment with immunosupresors. | 6 | immunosuppression_2_v2__6 | Bone Marrow transplant | 7 | immunosuppression_2_v2__7 | HIV with CD4 < 500 | 8 | immunosuppression_2_v2__8 | Leukemia/Myeloma within the last 6 months | 9 | immunosuppression_2_v2__9 | Non-Hodgkin's Lymphoma within the last 6 months | 10 | immunosuppression_2_v2__10 | Solid tumor with metastatic disease within the last 6 months |
| 1    | immunosuppression_2_v2__1                                                              | Prednisone or equivalent = or > 0.3 mg/Kg/d?                   |                                                                                                                                                                                                                                                                                                                                                                                                                                                                                                                                                                                                                                                                                                                                                                                                                                                                                                                                                                                                                                                                                                                                                                                                                                                                                                                                                                                                                                                                                                                                                                                                                                                                                                                                                                                                                                                                                                                                                                                                                                                                                                                                 |   |                           |                                              |            |                           |                                                                |   |                           |             |   |                           |                             |   |                           |                                                          |   |                           |                        |   |                           |                    |   |                           |                                           |   |                           |                                                 |    |                            |                                                              |
| 2    | immunosuppression_2_v2__2                                                              | Current chemotherapy or chemotherapy within the last 3 months? |                                                                                                                                                                                                                                                                                                                                                                                                                                                                                                                                                                                                                                                                                                                                                                                                                                                                                                                                                                                                                                                                                                                                                                                                                                                                                                                                                                                                                                                                                                                                                                                                                                                                                                                                                                                                                                                                                                                                                                                                                                                                                                                                 |   |                           |                                              |            |                           |                                                                |   |                           |             |   |                           |                             |   |                           |                                                          |   |                           |                        |   |                           |                    |   |                           |                                           |   |                           |                                                 |    |                            |                                                              |
| 3    | immunosuppression_2_v2__3                                                              | Neutropenia                                                    |                                                                                                                                                                                                                                                                                                                                                                                                                                                                                                                                                                                                                                                                                                                                                                                                                                                                                                                                                                                                                                                                                                                                                                                                                                                                                                                                                                                                                                                                                                                                                                                                                                                                                                                                                                                                                                                                                                                                                                                                                                                                                                                                 |   |                           |                                              |            |                           |                                                                |   |                           |             |   |                           |                             |   |                           |                                                          |   |                           |                        |   |                           |                    |   |                           |                                           |   |                           |                                                 |    |                            |                                                              |
| 4    | immunosuppression_2_v2__4                                                              | Solid organ transplantation                                    |                                                                                                                                                                                                                                                                                                                                                                                                                                                                                                                                                                                                                                                                                                                                                                                                                                                                                                                                                                                                                                                                                                                                                                                                                                                                                                                                                                                                                                                                                                                                                                                                                                                                                                                                                                                                                                                                                                                                                                                                                                                                                                                                 |   |                           |                                              |            |                           |                                                                |   |                           |             |   |                           |                             |   |                           |                                                          |   |                           |                        |   |                           |                    |   |                           |                                           |   |                           |                                                 |    |                            |                                                              |
| 5    | immunosuppression_2_v2__5                                                              | Rheumatologic disease in treatment with immunosupresors.       |                                                                                                                                                                                                                                                                                                                                                                                                                                                                                                                                                                                                                                                                                                                                                                                                                                                                                                                                                                                                                                                                                                                                                                                                                                                                                                                                                                                                                                                                                                                                                                                                                                                                                                                                                                                                                                                                                                                                                                                                                                                                                                                                 |   |                           |                                              |            |                           |                                                                |   |                           |             |   |                           |                             |   |                           |                                                          |   |                           |                        |   |                           |                    |   |                           |                                           |   |                           |                                                 |    |                            |                                                              |
| 6    | immunosuppression_2_v2__6                                                              | Bone Marrow transplant                                         |                                                                                                                                                                                                                                                                                                                                                                                                                                                                                                                                                                                                                                                                                                                                                                                                                                                                                                                                                                                                                                                                                                                                                                                                                                                                                                                                                                                                                                                                                                                                                                                                                                                                                                                                                                                                                                                                                                                                                                                                                                                                                                                                 |   |                           |                                              |            |                           |                                                                |   |                           |             |   |                           |                             |   |                           |                                                          |   |                           |                        |   |                           |                    |   |                           |                                           |   |                           |                                                 |    |                            |                                                              |
| 7    | immunosuppression_2_v2__7                                                              | HIV with CD4 < 500                                             |                                                                                                                                                                                                                                                                                                                                                                                                                                                                                                                                                                                                                                                                                                                                                                                                                                                                                                                                                                                                                                                                                                                                                                                                                                                                                                                                                                                                                                                                                                                                                                                                                                                                                                                                                                                                                                                                                                                                                                                                                                                                                                                                 |   |                           |                                              |            |                           |                                                                |   |                           |             |   |                           |                             |   |                           |                                                          |   |                           |                        |   |                           |                    |   |                           |                                           |   |                           |                                                 |    |                            |                                                              |
| 8    | immunosuppression_2_v2__8                                                              | Leukemia/Myeloma within the last 6 months                      |                                                                                                                                                                                                                                                                                                                                                                                                                                                                                                                                                                                                                                                                                                                                                                                                                                                                                                                                                                                                                                                                                                                                                                                                                                                                                                                                                                                                                                                                                                                                                                                                                                                                                                                                                                                                                                                                                                                                                                                                                                                                                                                                 |   |                           |                                              |            |                           |                                                                |   |                           |             |   |                           |                             |   |                           |                                                          |   |                           |                        |   |                           |                    |   |                           |                                           |   |                           |                                                 |    |                            |                                                              |
| 9    | immunosuppression_2_v2__9                                                              | Non-Hodgkin's Lymphoma within the last 6 months                |                                                                                                                                                                                                                                                                                                                                                                                                                                                                                                                                                                                                                                                                                                                                                                                                                                                                                                                                                                                                                                                                                                                                                                                                                                                                                                                                                                                                                                                                                                                                                                                                                                                                                                                                                                                                                                                                                                                                                                                                                                                                                                                                 |   |                           |                                              |            |                           |                                                                |   |                           |             |   |                           |                             |   |                           |                                                          |   |                           |                        |   |                           |                    |   |                           |                                           |   |                           |                                                 |    |                            |                                                              |
| 10   | immunosuppression_2_v2__10                                                             | Solid tumor with metastatic disease within the last 6 months   |                                                                                                                                                                                                                                                                                                                                                                                                                                                                                                                                                                                                                                                                                                                                                                                                                                                                                                                                                                                                                                                                                                                                                                                                                                                                                                                                                                                                                                                                                                                                                                                                                                                                                                                                                                                                                                                                                                                                                                                                                                                                                                                                 |   |                           |                                              |            |                           |                                                                |   |                           |             |   |                           |                             |   |                           |                                                          |   |                           |                        |   |                           |                    |   |                           |                                           |   |                           |                                                 |    |                            |                                                              |
| 1308 | prednisolone_v2                                                                        | Equivalents of Methylprednisolone                              | descriptive                                                                                                                                                                                                                                                                                                                                                                                                                                                                                                                                                                                                                                                                                                                                                                                                                                                                                                                                                                                                                                                                                                                                                                                                                                                                                                                                                                                                                                                                                                                                                                                                                                                                                                                                                                                                                                                                                                                                                                                                                                                                                                                     |   |                           |                                              |            |                           |                                                                |   |                           |             |   |                           |                             |   |                           |                                                          |   |                           |                        |   |                           |                    |   |                           |                                           |   |                           |                                                 |    |                            |                                                              |
| 1309 | solid_transplantation_v2<br>Show the field ONLY if:<br>[immunosuppression_v2(4)] = '1' | Type of solid organ transplantation                            | dropdown<br><table border="1"> <tr> <td data-bbox="1040 1627 1068 1663">1</td> <td data-bbox="1068 1627 1136 1663">Kidney</td> </tr> <tr> <td data-bbox="1040 1663 1068 1698">2</td> <td data-bbox="1068 1663 1136 1698">Liver</td> </tr> <tr> <td data-bbox="1040 1698 1068 1734">3</td> <td data-bbox="1068 1698 1136 1734">Heart</td> </tr> <tr> <td data-bbox="1040 1734 1068 1770">4</td> <td data-bbox="1068 1734 1136 1770">Lung</td> </tr> </table>                                                                                                                                                                                                                                                                                                                                                                                                                                                                                                                                                                                                                                                                                                                                                                                                                                                                                                                                                                                                                                                                                                                                                                                                                                                                                                                                                                                                                                                                                                                                                                                                                                                                     | 1 | Kidney                    | 2                                            | Liver      | 3                         | Heart                                                          | 4 | Lung                      |             |   |                           |                             |   |                           |                                                          |   |                           |                        |   |                           |                    |   |                           |                                           |   |                           |                                                 |    |                            |                                                              |
| 1    | Kidney                                                                                 |                                                                |                                                                                                                                                                                                                                                                                                                                                                                                                                                                                                                                                                                                                                                                                                                                                                                                                                                                                                                                                                                                                                                                                                                                                                                                                                                                                                                                                                                                                                                                                                                                                                                                                                                                                                                                                                                                                                                                                                                                                                                                                                                                                                                                 |   |                           |                                              |            |                           |                                                                |   |                           |             |   |                           |                             |   |                           |                                                          |   |                           |                        |   |                           |                    |   |                           |                                           |   |                           |                                                 |    |                            |                                                              |
| 2    | Liver                                                                                  |                                                                |                                                                                                                                                                                                                                                                                                                                                                                                                                                                                                                                                                                                                                                                                                                                                                                                                                                                                                                                                                                                                                                                                                                                                                                                                                                                                                                                                                                                                                                                                                                                                                                                                                                                                                                                                                                                                                                                                                                                                                                                                                                                                                                                 |   |                           |                                              |            |                           |                                                                |   |                           |             |   |                           |                             |   |                           |                                                          |   |                           |                        |   |                           |                    |   |                           |                                           |   |                           |                                                 |    |                            |                                                              |
| 3    | Heart                                                                                  |                                                                |                                                                                                                                                                                                                                                                                                                                                                                                                                                                                                                                                                                                                                                                                                                                                                                                                                                                                                                                                                                                                                                                                                                                                                                                                                                                                                                                                                                                                                                                                                                                                                                                                                                                                                                                                                                                                                                                                                                                                                                                                                                                                                                                 |   |                           |                                              |            |                           |                                                                |   |                           |             |   |                           |                             |   |                           |                                                          |   |                           |                        |   |                           |                    |   |                           |                                           |   |                           |                                                 |    |                            |                                                              |
| 4    | Lung                                                                                   |                                                                |                                                                                                                                                                                                                                                                                                                                                                                                                                                                                                                                                                                                                                                                                                                                                                                                                                                                                                                                                                                                                                                                                                                                                                                                                                                                                                                                                                                                                                                                                                                                                                                                                                                                                                                                                                                                                                                                                                                                                                                                                                                                                                                                 |   |                           |                                              |            |                           |                                                                |   |                           |             |   |                           |                             |   |                           |                                                          |   |                           |                        |   |                           |                    |   |                           |                                           |   |                           |                                                 |    |                            |                                                              |
| 1310 | bone_marrow_v2<br>Show the field ONLY if:<br>[immunosuppression_v2(6)] = '1'           | Date of Bone Marrow Transplant                                 | text (date_mdy)                                                                                                                                                                                                                                                                                                                                                                                                                                                                                                                                                                                                                                                                                                                                                                                                                                                                                                                                                                                                                                                                                                                                                                                                                                                                                                                                                                                                                                                                                                                                                                                                                                                                                                                                                                                                                                                                                                                                                                                                                                                                                                                 |   |                           |                                              |            |                           |                                                                |   |                           |             |   |                           |                             |   |                           |                                                          |   |                           |                        |   |                           |                    |   |                           |                                           |   |                           |                                                 |    |                            |                                                              |
| 1311 | type_of_transplant_v2<br>Show the field ONLY if:<br>[immunosuppression_v2(6)] = '1'    | Type of bone marrow transplant                                 | dropdown<br><table border="1"> <tr> <td data-bbox="1040 1906 1068 1942">1</td> <td data-bbox="1068 1906 1170 1942">Autologous</td> </tr> <tr> <td data-bbox="1040 1942 1068 1978">2</td> <td data-bbox="1068 1942 1170 1978">Allogeneic</td> </tr> </table>                                                                                                                                                                                                                                                                                                                                                                                                                                                                                                                                                                                                                                                                                                                                                                                                                                                                                                                                                                                                                                                                                                                                                                                                                                                                                                                                                                                                                                                                                                                                                                                                                                                                                                                                                                                                                                                                     | 1 | Autologous                | 2                                            | Allogeneic |                           |                                                                |   |                           |             |   |                           |                             |   |                           |                                                          |   |                           |                        |   |                           |                    |   |                           |                                           |   |                           |                                                 |    |                            |                                                              |
| 1    | Autologous                                                                             |                                                                |                                                                                                                                                                                                                                                                                                                                                                                                                                                                                                                                                                                                                                                                                                                                                                                                                                                                                                                                                                                                                                                                                                                                                                                                                                                                                                                                                                                                                                                                                                                                                                                                                                                                                                                                                                                                                                                                                                                                                                                                                                                                                                                                 |   |                           |                                              |            |                           |                                                                |   |                           |             |   |                           |                             |   |                           |                                                          |   |                           |                        |   |                           |                    |   |                           |                                           |   |                           |                                                 |    |                            |                                                              |
| 2    | Allogeneic                                                                             |                                                                |                                                                                                                                                                                                                                                                                                                                                                                                                                                                                                                                                                                                                                                                                                                                                                                                                                                                                                                                                                                                                                                                                                                                                                                                                                                                                                                                                                                                                                                                                                                                                                                                                                                                                                                                                                                                                                                                                                                                                                                                                                                                                                                                 |   |                           |                                              |            |                           |                                                                |   |                           |             |   |                           |                             |   |                           |                                                          |   |                           |                        |   |                           |                    |   |                           |                                           |   |                           |                                                 |    |                            |                                                              |

|      |                                                                                                |                                                                                                                 |                                                                                                                                                                                                                                                                                                                                                                                                                                                                                                                                                                                                                                                                                                                                                                                                                                                                                                                                                                                                                                                                                                                                   |   |                                                 |    |                                                  |                           |                                          |   |                                           |                |                                      |                           |                 |   |                           |               |   |                           |                       |   |                           |                                       |   |                           |       |   |                           |          |   |                           |           |    |                            |               |    |                            |           |    |                            |       |    |                            |         |
|------|------------------------------------------------------------------------------------------------|-----------------------------------------------------------------------------------------------------------------|-----------------------------------------------------------------------------------------------------------------------------------------------------------------------------------------------------------------------------------------------------------------------------------------------------------------------------------------------------------------------------------------------------------------------------------------------------------------------------------------------------------------------------------------------------------------------------------------------------------------------------------------------------------------------------------------------------------------------------------------------------------------------------------------------------------------------------------------------------------------------------------------------------------------------------------------------------------------------------------------------------------------------------------------------------------------------------------------------------------------------------------|---|-------------------------------------------------|----|--------------------------------------------------|---------------------------|------------------------------------------|---|-------------------------------------------|----------------|--------------------------------------|---------------------------|-----------------|---|---------------------------|---------------|---|---------------------------|-----------------------|---|---------------------------|---------------------------------------|---|---------------------------|-------|---|---------------------------|----------|---|---------------------------|-----------|----|----------------------------|---------------|----|----------------------------|-----------|----|----------------------------|-------|----|----------------------------|---------|
| 1312 | <p>surgery_v2</p> <p>Show the field ONLY if:<br/>[medical_history_v2(12)] = '1'</p>            | Surgical History                                                                                                | <p>dropdown</p> <table border="1"> <tr><td>1</td><td>Elective operation during the current admission</td></tr> <tr><td>2</td><td>Emergency operation during the current admission</td></tr> <tr><td>3</td><td>Elective surgery within the past 30 days</td></tr> <tr><td>4</td><td>Emergency surgery within the past 30 days</td></tr> <tr><td>5</td><td>Any surgery within the past 6 months</td></tr> </table>                                                                                                                                                                                                                                                                                                                                                                                                                                                                                                                                                                                                                                                                                                                  | 1 | Elective operation during the current admission | 2  | Emergency operation during the current admission | 3                         | Elective surgery within the past 30 days | 4 | Emergency surgery within the past 30 days | 5              | Any surgery within the past 6 months |                           |                 |   |                           |               |   |                           |                       |   |                           |                                       |   |                           |       |   |                           |          |   |                           |           |    |                            |               |    |                            |           |    |                            |       |    |                            |         |
| 1    | Elective operation during the current admission                                                |                                                                                                                 |                                                                                                                                                                                                                                                                                                                                                                                                                                                                                                                                                                                                                                                                                                                                                                                                                                                                                                                                                                                                                                                                                                                                   |   |                                                 |    |                                                  |                           |                                          |   |                                           |                |                                      |                           |                 |   |                           |               |   |                           |                       |   |                           |                                       |   |                           |       |   |                           |          |   |                           |           |    |                            |               |    |                            |           |    |                            |       |    |                            |         |
| 2    | Emergency operation during the current admission                                               |                                                                                                                 |                                                                                                                                                                                                                                                                                                                                                                                                                                                                                                                                                                                                                                                                                                                                                                                                                                                                                                                                                                                                                                                                                                                                   |   |                                                 |    |                                                  |                           |                                          |   |                                           |                |                                      |                           |                 |   |                           |               |   |                           |                       |   |                           |                                       |   |                           |       |   |                           |          |   |                           |           |    |                            |               |    |                            |           |    |                            |       |    |                            |         |
| 3    | Elective surgery within the past 30 days                                                       |                                                                                                                 |                                                                                                                                                                                                                                                                                                                                                                                                                                                                                                                                                                                                                                                                                                                                                                                                                                                                                                                                                                                                                                                                                                                                   |   |                                                 |    |                                                  |                           |                                          |   |                                           |                |                                      |                           |                 |   |                           |               |   |                           |                       |   |                           |                                       |   |                           |       |   |                           |          |   |                           |           |    |                            |               |    |                            |           |    |                            |       |    |                            |         |
| 4    | Emergency surgery within the past 30 days                                                      |                                                                                                                 |                                                                                                                                                                                                                                                                                                                                                                                                                                                                                                                                                                                                                                                                                                                                                                                                                                                                                                                                                                                                                                                                                                                                   |   |                                                 |    |                                                  |                           |                                          |   |                                           |                |                                      |                           |                 |   |                           |               |   |                           |                       |   |                           |                                       |   |                           |       |   |                           |          |   |                           |           |    |                            |               |    |                            |           |    |                            |       |    |                            |         |
| 5    | Any surgery within the past 6 months                                                           |                                                                                                                 |                                                                                                                                                                                                                                                                                                                                                                                                                                                                                                                                                                                                                                                                                                                                                                                                                                                                                                                                                                                                                                                                                                                                   |   |                                                 |    |                                                  |                           |                                          |   |                                           |                |                                      |                           |                 |   |                           |               |   |                           |                       |   |                           |                                       |   |                           |       |   |                           |          |   |                           |           |    |                            |               |    |                            |           |    |                            |       |    |                            |         |
| 1313 | <p>rheumato_disease_v2</p> <p>Show the field ONLY if:<br/>[medical_history_v2(13)] = '1'</p>   | Rheumatologic disease                                                                                           | <p>dropdown</p> <table border="1"> <tr><td>1</td><td>LES</td></tr> <tr><td>2</td><td>Rheumatoid Arthritis</td></tr> <tr><td>3</td><td>Systemic Sclerosis</td></tr> <tr><td>4</td><td>Vasculitis</td></tr> <tr><td>5</td><td>other</td></tr> </table>                                                                                                                                                                                                                                                                                                                                                                                                                                                                                                                                                                                                                                                                                                                                                                                                                                                                              | 1 | LES                                             | 2  | Rheumatoid Arthritis                             | 3                         | Systemic Sclerosis                       | 4 | Vasculitis                                | 5              | other                                |                           |                 |   |                           |               |   |                           |                       |   |                           |                                       |   |                           |       |   |                           |          |   |                           |           |    |                            |               |    |                            |           |    |                            |       |    |                            |         |
| 1    | LES                                                                                            |                                                                                                                 |                                                                                                                                                                                                                                                                                                                                                                                                                                                                                                                                                                                                                                                                                                                                                                                                                                                                                                                                                                                                                                                                                                                                   |   |                                                 |    |                                                  |                           |                                          |   |                                           |                |                                      |                           |                 |   |                           |               |   |                           |                       |   |                           |                                       |   |                           |       |   |                           |          |   |                           |           |    |                            |               |    |                            |           |    |                            |       |    |                            |         |
| 2    | Rheumatoid Arthritis                                                                           |                                                                                                                 |                                                                                                                                                                                                                                                                                                                                                                                                                                                                                                                                                                                                                                                                                                                                                                                                                                                                                                                                                                                                                                                                                                                                   |   |                                                 |    |                                                  |                           |                                          |   |                                           |                |                                      |                           |                 |   |                           |               |   |                           |                       |   |                           |                                       |   |                           |       |   |                           |          |   |                           |           |    |                            |               |    |                            |           |    |                            |       |    |                            |         |
| 3    | Systemic Sclerosis                                                                             |                                                                                                                 |                                                                                                                                                                                                                                                                                                                                                                                                                                                                                                                                                                                                                                                                                                                                                                                                                                                                                                                                                                                                                                                                                                                                   |   |                                                 |    |                                                  |                           |                                          |   |                                           |                |                                      |                           |                 |   |                           |               |   |                           |                       |   |                           |                                       |   |                           |       |   |                           |          |   |                           |           |    |                            |               |    |                            |           |    |                            |       |    |                            |         |
| 4    | Vasculitis                                                                                     |                                                                                                                 |                                                                                                                                                                                                                                                                                                                                                                                                                                                                                                                                                                                                                                                                                                                                                                                                                                                                                                                                                                                                                                                                                                                                   |   |                                                 |    |                                                  |                           |                                          |   |                                           |                |                                      |                           |                 |   |                           |               |   |                           |                       |   |                           |                                       |   |                           |       |   |                           |          |   |                           |           |    |                            |               |    |                            |           |    |                            |       |    |                            |         |
| 5    | other                                                                                          |                                                                                                                 |                                                                                                                                                                                                                                                                                                                                                                                                                                                                                                                                                                                                                                                                                                                                                                                                                                                                                                                                                                                                                                                                                                                                   |   |                                                 |    |                                                  |                           |                                          |   |                                           |                |                                      |                           |                 |   |                           |               |   |                           |                       |   |                           |                                       |   |                           |       |   |                           |          |   |                           |           |    |                            |               |    |                            |           |    |                            |       |    |                            |         |
| 1314 | <p>substance_abuse_v2</p>                                                                      | Substance abuse                                                                                                 | <p>checkbox</p> <table border="1"> <tr><td>1</td><td>substance_abuse_v2__1</td><td>No</td></tr> <tr><td>2</td><td>substance_abuse_v2__2</td><td>Alcohol</td></tr> <tr><td>3</td><td>substance_abuse_v2__3</td><td>Illicit Drugs</td></tr> <tr><td>4</td><td>substance_abuse_v2__4</td><td>Smoking history</td></tr> </table>                                                                                                                                                                                                                                                                                                                                                                                                                                                                                                                                                                                                                                                                                                                                                                                                      | 1 | substance_abuse_v2__1                           | No | 2                                                | substance_abuse_v2__2     | Alcohol                                  | 3 | substance_abuse_v2__3                     | Illicit Drugs  | 4                                    | substance_abuse_v2__4     | Smoking history |   |                           |               |   |                           |                       |   |                           |                                       |   |                           |       |   |                           |          |   |                           |           |    |                            |               |    |                            |           |    |                            |       |    |                            |         |
| 1    | substance_abuse_v2__1                                                                          | No                                                                                                              |                                                                                                                                                                                                                                                                                                                                                                                                                                                                                                                                                                                                                                                                                                                                                                                                                                                                                                                                                                                                                                                                                                                                   |   |                                                 |    |                                                  |                           |                                          |   |                                           |                |                                      |                           |                 |   |                           |               |   |                           |                       |   |                           |                                       |   |                           |       |   |                           |          |   |                           |           |    |                            |               |    |                            |           |    |                            |       |    |                            |         |
| 2    | substance_abuse_v2__2                                                                          | Alcohol                                                                                                         |                                                                                                                                                                                                                                                                                                                                                                                                                                                                                                                                                                                                                                                                                                                                                                                                                                                                                                                                                                                                                                                                                                                                   |   |                                                 |    |                                                  |                           |                                          |   |                                           |                |                                      |                           |                 |   |                           |               |   |                           |                       |   |                           |                                       |   |                           |       |   |                           |          |   |                           |           |    |                            |               |    |                            |           |    |                            |       |    |                            |         |
| 3    | substance_abuse_v2__3                                                                          | Illicit Drugs                                                                                                   |                                                                                                                                                                                                                                                                                                                                                                                                                                                                                                                                                                                                                                                                                                                                                                                                                                                                                                                                                                                                                                                                                                                                   |   |                                                 |    |                                                  |                           |                                          |   |                                           |                |                                      |                           |                 |   |                           |               |   |                           |                       |   |                           |                                       |   |                           |       |   |                           |          |   |                           |           |    |                            |               |    |                            |           |    |                            |       |    |                            |         |
| 4    | substance_abuse_v2__4                                                                          | Smoking history                                                                                                 |                                                                                                                                                                                                                                                                                                                                                                                                                                                                                                                                                                                                                                                                                                                                                                                                                                                                                                                                                                                                                                                                                                                                   |   |                                                 |    |                                                  |                           |                                          |   |                                           |                |                                      |                           |                 |   |                           |               |   |                           |                       |   |                           |                                       |   |                           |       |   |                           |          |   |                           |           |    |                            |               |    |                            |           |    |                            |       |    |                            |         |
| 1315 | <p>alcohol_consumption_v2</p> <p>Show the field ONLY if:<br/>[substance_abuse_v2(2)] = '1'</p> | <p>Alcohol consumption</p> <p><i>Please choose severe if patient has history of withdrawal or cirrhosis</i></p> | <p>dropdown</p> <table border="1"> <tr><td>1</td><td>Mild</td></tr> <tr><td>2</td><td>Severe</td></tr> </table>                                                                                                                                                                                                                                                                                                                                                                                                                                                                                                                                                                                                                                                                                                                                                                                                                                                                                                                                                                                                                   | 1 | Mild                                            | 2  | Severe                                           |                           |                                          |   |                                           |                |                                      |                           |                 |   |                           |               |   |                           |                       |   |                           |                                       |   |                           |       |   |                           |          |   |                           |           |    |                            |               |    |                            |           |    |                            |       |    |                            |         |
| 1    | Mild                                                                                           |                                                                                                                 |                                                                                                                                                                                                                                                                                                                                                                                                                                                                                                                                                                                                                                                                                                                                                                                                                                                                                                                                                                                                                                                                                                                                   |   |                                                 |    |                                                  |                           |                                          |   |                                           |                |                                      |                           |                 |   |                           |               |   |                           |                       |   |                           |                                       |   |                           |       |   |                           |          |   |                           |           |    |                            |               |    |                            |           |    |                            |       |    |                            |         |
| 2    | Severe                                                                                         |                                                                                                                 |                                                                                                                                                                                                                                                                                                                                                                                                                                                                                                                                                                                                                                                                                                                                                                                                                                                                                                                                                                                                                                                                                                                                   |   |                                                 |    |                                                  |                           |                                          |   |                                           |                |                                      |                           |                 |   |                           |               |   |                           |                       |   |                           |                                       |   |                           |       |   |                           |          |   |                           |           |    |                            |               |    |                            |           |    |                            |       |    |                            |         |
| 1316 | <p>iv_drugs_v2</p> <p>Show the field ONLY if:<br/>[substance_abuse_v2(3)] = '1'</p>            | Has the patient used IV drugs?                                                                                  | <p>dropdown</p> <table border="1"> <tr><td>1</td><td>Yes</td></tr> <tr><td>0</td><td>No</td></tr> </table>                                                                                                                                                                                                                                                                                                                                                                                                                                                                                                                                                                                                                                                                                                                                                                                                                                                                                                                                                                                                                        | 1 | Yes                                             | 0  | No                                               |                           |                                          |   |                                           |                |                                      |                           |                 |   |                           |               |   |                           |                       |   |                           |                                       |   |                           |       |   |                           |          |   |                           |           |    |                            |               |    |                            |           |    |                            |       |    |                            |         |
| 1    | Yes                                                                                            |                                                                                                                 |                                                                                                                                                                                                                                                                                                                                                                                                                                                                                                                                                                                                                                                                                                                                                                                                                                                                                                                                                                                                                                                                                                                                   |   |                                                 |    |                                                  |                           |                                          |   |                                           |                |                                      |                           |                 |   |                           |               |   |                           |                       |   |                           |                                       |   |                           |       |   |                           |          |   |                           |           |    |                            |               |    |                            |           |    |                            |       |    |                            |         |
| 0    | No                                                                                             |                                                                                                                 |                                                                                                                                                                                                                                                                                                                                                                                                                                                                                                                                                                                                                                                                                                                                                                                                                                                                                                                                                                                                                                                                                                                                   |   |                                                 |    |                                                  |                           |                                          |   |                                           |                |                                      |                           |                 |   |                           |               |   |                           |                       |   |                           |                                       |   |                           |       |   |                           |          |   |                           |           |    |                            |               |    |                            |           |    |                            |       |    |                            |         |
| 1317 | <p>smoking_v2</p> <p>Show the field ONLY if:<br/>[substance_abuse_v2(4)] = '1'</p>             | Smoking History                                                                                                 | <p>dropdown</p> <table border="1"> <tr><td>1</td><td>Quit &gt; 1 year ago</td></tr> <tr><td>2</td><td>Quit &lt; 1 year ago or current smoker</td></tr> </table>                                                                                                                                                                                                                                                                                                                                                                                                                                                                                                                                                                                                                                                                                                                                                                                                                                                                                                                                                                   | 1 | Quit > 1 year ago                               | 2  | Quit < 1 year ago or current smoker              |                           |                                          |   |                                           |                |                                      |                           |                 |   |                           |               |   |                           |                       |   |                           |                                       |   |                           |       |   |                           |          |   |                           |           |    |                            |               |    |                            |           |    |                            |       |    |                            |         |
| 1    | Quit > 1 year ago                                                                              |                                                                                                                 |                                                                                                                                                                                                                                                                                                                                                                                                                                                                                                                                                                                                                                                                                                                                                                                                                                                                                                                                                                                                                                                                                                                                   |   |                                                 |    |                                                  |                           |                                          |   |                                           |                |                                      |                           |                 |   |                           |               |   |                           |                       |   |                           |                                       |   |                           |       |   |                           |          |   |                           |           |    |                            |               |    |                            |           |    |                            |       |    |                            |         |
| 2    | Quit < 1 year ago or current smoker                                                            |                                                                                                                 |                                                                                                                                                                                                                                                                                                                                                                                                                                                                                                                                                                                                                                                                                                                                                                                                                                                                                                                                                                                                                                                                                                                                   |   |                                                 |    |                                                  |                           |                                          |   |                                           |                |                                      |                           |                 |   |                           |               |   |                           |                       |   |                           |                                       |   |                           |       |   |                           |          |   |                           |           |    |                            |               |    |                            |           |    |                            |       |    |                            |         |
| 1318 | <p>pack_year_v2</p> <p>Show the field ONLY if:<br/>[substance_abuse_v2(4)] = '1'</p>           | Smoking Pack Year                                                                                               | text                                                                                                                                                                                                                                                                                                                                                                                                                                                                                                                                                                                                                                                                                                                                                                                                                                                                                                                                                                                                                                                                                                                              |   |                                                 |    |                                                  |                           |                                          |   |                                           |                |                                      |                           |                 |   |                           |               |   |                           |                       |   |                           |                                       |   |                           |       |   |                           |          |   |                           |           |    |                            |               |    |                            |           |    |                            |       |    |                            |         |
| 1319 | <p>living_v2</p>                                                                               | Living facilities                                                                                               | <p>dropdown</p> <table border="1"> <tr><td>1</td><td>Assisted living facilities</td></tr> <tr><td>2</td><td>Home</td></tr> </table>                                                                                                                                                                                                                                                                                                                                                                                                                                                                                                                                                                                                                                                                                                                                                                                                                                                                                                                                                                                               | 1 | Assisted living facilities                      | 2  | Home                                             |                           |                                          |   |                                           |                |                                      |                           |                 |   |                           |               |   |                           |                       |   |                           |                                       |   |                           |       |   |                           |          |   |                           |           |    |                            |               |    |                            |           |    |                            |       |    |                            |         |
| 1    | Assisted living facilities                                                                     |                                                                                                                 |                                                                                                                                                                                                                                                                                                                                                                                                                                                                                                                                                                                                                                                                                                                                                                                                                                                                                                                                                                                                                                                                                                                                   |   |                                                 |    |                                                  |                           |                                          |   |                                           |                |                                      |                           |                 |   |                           |               |   |                           |                       |   |                           |                                       |   |                           |       |   |                           |          |   |                           |           |    |                            |               |    |                            |           |    |                            |       |    |                            |         |
| 2    | Home                                                                                           |                                                                                                                 |                                                                                                                                                                                                                                                                                                                                                                                                                                                                                                                                                                                                                                                                                                                                                                                                                                                                                                                                                                                                                                                                                                                                   |   |                                                 |    |                                                  |                           |                                          |   |                                           |                |                                      |                           |                 |   |                           |               |   |                           |                       |   |                           |                                       |   |                           |       |   |                           |          |   |                           |           |    |                            |               |    |                            |           |    |                            |       |    |                            |         |
| 1320 | <p>chronic_medications_v2</p>                                                                  | Chronic medications                                                                                             | <p>checkbox</p> <table border="1"> <tr><td>0</td><td>chronic_medications_v2__0</td><td>No</td></tr> <tr><td>1</td><td>chronic_medications_v2__1</td><td>ASA</td></tr> <tr><td>2</td><td>chronic_medications_v2__2</td><td>Anticoagulants</td></tr> <tr><td>3</td><td>chronic_medications_v2__3</td><td>Statins</td></tr> <tr><td>4</td><td>chronic_medications_v2__4</td><td>ACE-inhibitor</td></tr> <tr><td>5</td><td>chronic_medications_v2__5</td><td>Prednisone (&gt;5mg/day)</td></tr> <tr><td>6</td><td>chronic_medications_v2__6</td><td>Angiotensin II Receptor Blocker (ARB)</td></tr> <tr><td>7</td><td>chronic_medications_v2__7</td><td>NSAID</td></tr> <tr><td>8</td><td>chronic_medications_v2__8</td><td>Diuretic</td></tr> <tr><td>9</td><td>chronic_medications_v2__9</td><td>Metformin</td></tr> <tr><td>10</td><td>chronic_medications_v2__10</td><td>Carbamazepine</td></tr> <tr><td>11</td><td>chronic_medications_v2__11</td><td>B blocker</td></tr> <tr><td>00</td><td>chronic_medications_v2__00</td><td>Other</td></tr> <tr><td>88</td><td>chronic_medications_v2__88</td><td>Unknown</td></tr> </table> | 0 | chronic_medications_v2__0                       | No | 1                                                | chronic_medications_v2__1 | ASA                                      | 2 | chronic_medications_v2__2                 | Anticoagulants | 3                                    | chronic_medications_v2__3 | Statins         | 4 | chronic_medications_v2__4 | ACE-inhibitor | 5 | chronic_medications_v2__5 | Prednisone (>5mg/day) | 6 | chronic_medications_v2__6 | Angiotensin II Receptor Blocker (ARB) | 7 | chronic_medications_v2__7 | NSAID | 8 | chronic_medications_v2__8 | Diuretic | 9 | chronic_medications_v2__9 | Metformin | 10 | chronic_medications_v2__10 | Carbamazepine | 11 | chronic_medications_v2__11 | B blocker | 00 | chronic_medications_v2__00 | Other | 88 | chronic_medications_v2__88 | Unknown |
| 0    | chronic_medications_v2__0                                                                      | No                                                                                                              |                                                                                                                                                                                                                                                                                                                                                                                                                                                                                                                                                                                                                                                                                                                                                                                                                                                                                                                                                                                                                                                                                                                                   |   |                                                 |    |                                                  |                           |                                          |   |                                           |                |                                      |                           |                 |   |                           |               |   |                           |                       |   |                           |                                       |   |                           |       |   |                           |          |   |                           |           |    |                            |               |    |                            |           |    |                            |       |    |                            |         |
| 1    | chronic_medications_v2__1                                                                      | ASA                                                                                                             |                                                                                                                                                                                                                                                                                                                                                                                                                                                                                                                                                                                                                                                                                                                                                                                                                                                                                                                                                                                                                                                                                                                                   |   |                                                 |    |                                                  |                           |                                          |   |                                           |                |                                      |                           |                 |   |                           |               |   |                           |                       |   |                           |                                       |   |                           |       |   |                           |          |   |                           |           |    |                            |               |    |                            |           |    |                            |       |    |                            |         |
| 2    | chronic_medications_v2__2                                                                      | Anticoagulants                                                                                                  |                                                                                                                                                                                                                                                                                                                                                                                                                                                                                                                                                                                                                                                                                                                                                                                                                                                                                                                                                                                                                                                                                                                                   |   |                                                 |    |                                                  |                           |                                          |   |                                           |                |                                      |                           |                 |   |                           |               |   |                           |                       |   |                           |                                       |   |                           |       |   |                           |          |   |                           |           |    |                            |               |    |                            |           |    |                            |       |    |                            |         |
| 3    | chronic_medications_v2__3                                                                      | Statins                                                                                                         |                                                                                                                                                                                                                                                                                                                                                                                                                                                                                                                                                                                                                                                                                                                                                                                                                                                                                                                                                                                                                                                                                                                                   |   |                                                 |    |                                                  |                           |                                          |   |                                           |                |                                      |                           |                 |   |                           |               |   |                           |                       |   |                           |                                       |   |                           |       |   |                           |          |   |                           |           |    |                            |               |    |                            |           |    |                            |       |    |                            |         |
| 4    | chronic_medications_v2__4                                                                      | ACE-inhibitor                                                                                                   |                                                                                                                                                                                                                                                                                                                                                                                                                                                                                                                                                                                                                                                                                                                                                                                                                                                                                                                                                                                                                                                                                                                                   |   |                                                 |    |                                                  |                           |                                          |   |                                           |                |                                      |                           |                 |   |                           |               |   |                           |                       |   |                           |                                       |   |                           |       |   |                           |          |   |                           |           |    |                            |               |    |                            |           |    |                            |       |    |                            |         |
| 5    | chronic_medications_v2__5                                                                      | Prednisone (>5mg/day)                                                                                           |                                                                                                                                                                                                                                                                                                                                                                                                                                                                                                                                                                                                                                                                                                                                                                                                                                                                                                                                                                                                                                                                                                                                   |   |                                                 |    |                                                  |                           |                                          |   |                                           |                |                                      |                           |                 |   |                           |               |   |                           |                       |   |                           |                                       |   |                           |       |   |                           |          |   |                           |           |    |                            |               |    |                            |           |    |                            |       |    |                            |         |
| 6    | chronic_medications_v2__6                                                                      | Angiotensin II Receptor Blocker (ARB)                                                                           |                                                                                                                                                                                                                                                                                                                                                                                                                                                                                                                                                                                                                                                                                                                                                                                                                                                                                                                                                                                                                                                                                                                                   |   |                                                 |    |                                                  |                           |                                          |   |                                           |                |                                      |                           |                 |   |                           |               |   |                           |                       |   |                           |                                       |   |                           |       |   |                           |          |   |                           |           |    |                            |               |    |                            |           |    |                            |       |    |                            |         |
| 7    | chronic_medications_v2__7                                                                      | NSAID                                                                                                           |                                                                                                                                                                                                                                                                                                                                                                                                                                                                                                                                                                                                                                                                                                                                                                                                                                                                                                                                                                                                                                                                                                                                   |   |                                                 |    |                                                  |                           |                                          |   |                                           |                |                                      |                           |                 |   |                           |               |   |                           |                       |   |                           |                                       |   |                           |       |   |                           |          |   |                           |           |    |                            |               |    |                            |           |    |                            |       |    |                            |         |
| 8    | chronic_medications_v2__8                                                                      | Diuretic                                                                                                        |                                                                                                                                                                                                                                                                                                                                                                                                                                                                                                                                                                                                                                                                                                                                                                                                                                                                                                                                                                                                                                                                                                                                   |   |                                                 |    |                                                  |                           |                                          |   |                                           |                |                                      |                           |                 |   |                           |               |   |                           |                       |   |                           |                                       |   |                           |       |   |                           |          |   |                           |           |    |                            |               |    |                            |           |    |                            |       |    |                            |         |
| 9    | chronic_medications_v2__9                                                                      | Metformin                                                                                                       |                                                                                                                                                                                                                                                                                                                                                                                                                                                                                                                                                                                                                                                                                                                                                                                                                                                                                                                                                                                                                                                                                                                                   |   |                                                 |    |                                                  |                           |                                          |   |                                           |                |                                      |                           |                 |   |                           |               |   |                           |                       |   |                           |                                       |   |                           |       |   |                           |          |   |                           |           |    |                            |               |    |                            |           |    |                            |       |    |                            |         |
| 10   | chronic_medications_v2__10                                                                     | Carbamazepine                                                                                                   |                                                                                                                                                                                                                                                                                                                                                                                                                                                                                                                                                                                                                                                                                                                                                                                                                                                                                                                                                                                                                                                                                                                                   |   |                                                 |    |                                                  |                           |                                          |   |                                           |                |                                      |                           |                 |   |                           |               |   |                           |                       |   |                           |                                       |   |                           |       |   |                           |          |   |                           |           |    |                            |               |    |                            |           |    |                            |       |    |                            |         |
| 11   | chronic_medications_v2__11                                                                     | B blocker                                                                                                       |                                                                                                                                                                                                                                                                                                                                                                                                                                                                                                                                                                                                                                                                                                                                                                                                                                                                                                                                                                                                                                                                                                                                   |   |                                                 |    |                                                  |                           |                                          |   |                                           |                |                                      |                           |                 |   |                           |               |   |                           |                       |   |                           |                                       |   |                           |       |   |                           |          |   |                           |           |    |                            |               |    |                            |           |    |                            |       |    |                            |         |
| 00   | chronic_medications_v2__00                                                                     | Other                                                                                                           |                                                                                                                                                                                                                                                                                                                                                                                                                                                                                                                                                                                                                                                                                                                                                                                                                                                                                                                                                                                                                                                                                                                                   |   |                                                 |    |                                                  |                           |                                          |   |                                           |                |                                      |                           |                 |   |                           |               |   |                           |                       |   |                           |                                       |   |                           |       |   |                           |          |   |                           |           |    |                            |               |    |                            |           |    |                            |       |    |                            |         |
| 88   | chronic_medications_v2__88                                                                     | Unknown                                                                                                         |                                                                                                                                                                                                                                                                                                                                                                                                                                                                                                                                                                                                                                                                                                                                                                                                                                                                                                                                                                                                                                                                                                                                   |   |                                                 |    |                                                  |                           |                                          |   |                                           |                |                                      |                           |                 |   |                           |               |   |                           |                       |   |                           |                                       |   |                           |       |   |                           |          |   |                           |           |    |                            |               |    |                            |           |    |                            |       |    |                            |         |
| 1321 | <p>hospitalization_v2</p>                                                                      | Previous hospitalization in the past 30 days?                                                                   | <p>dropdown</p> <table border="1"> <tr><td>1</td><td>Yes</td></tr> <tr><td>0</td><td>No</td></tr> </table>                                                                                                                                                                                                                                                                                                                                                                                                                                                                                                                                                                                                                                                                                                                                                                                                                                                                                                                                                                                                                        | 1 | Yes                                             | 0  | No                                               |                           |                                          |   |                                           |                |                                      |                           |                 |   |                           |               |   |                           |                       |   |                           |                                       |   |                           |       |   |                           |          |   |                           |           |    |                            |               |    |                            |           |    |                            |       |    |                            |         |
| 1    | Yes                                                                                            |                                                                                                                 |                                                                                                                                                                                                                                                                                                                                                                                                                                                                                                                                                                                                                                                                                                                                                                                                                                                                                                                                                                                                                                                                                                                                   |   |                                                 |    |                                                  |                           |                                          |   |                                           |                |                                      |                           |                 |   |                           |               |   |                           |                       |   |                           |                                       |   |                           |       |   |                           |          |   |                           |           |    |                            |               |    |                            |           |    |                            |       |    |                            |         |
| 0    | No                                                                                             |                                                                                                                 |                                                                                                                                                                                                                                                                                                                                                                                                                                                                                                                                                                                                                                                                                                                                                                                                                                                                                                                                                                                                                                                                                                                                   |   |                                                 |    |                                                  |                           |                                          |   |                                           |                |                                      |                           |                 |   |                           |               |   |                           |                       |   |                           |                                       |   |                           |       |   |                           |          |   |                           |           |    |                            |               |    |                            |           |    |                            |       |    |                            |         |
| 1322 | <p>antibiotics_v2</p>                                                                          | Antibiotics use in the past 30 days?                                                                            | <p>dropdown</p> <table border="1"> <tr><td>1</td><td>Yes</td></tr> <tr><td>0</td><td>No</td></tr> </table>                                                                                                                                                                                                                                                                                                                                                                                                                                                                                                                                                                                                                                                                                                                                                                                                                                                                                                                                                                                                                        | 1 | Yes                                             | 0  | No                                               |                           |                                          |   |                                           |                |                                      |                           |                 |   |                           |               |   |                           |                       |   |                           |                                       |   |                           |       |   |                           |          |   |                           |           |    |                            |               |    |                            |           |    |                            |       |    |                            |         |
| 1    | Yes                                                                                            |                                                                                                                 |                                                                                                                                                                                                                                                                                                                                                                                                                                                                                                                                                                                                                                                                                                                                                                                                                                                                                                                                                                                                                                                                                                                                   |   |                                                 |    |                                                  |                           |                                          |   |                                           |                |                                      |                           |                 |   |                           |               |   |                           |                       |   |                           |                                       |   |                           |       |   |                           |          |   |                           |           |    |                            |               |    |                            |           |    |                            |       |    |                            |         |
| 0    | No                                                                                             |                                                                                                                 |                                                                                                                                                                                                                                                                                                                                                                                                                                                                                                                                                                                                                                                                                                                                                                                                                                                                                                                                                                                                                                                                                                                                   |   |                                                 |    |                                                  |                           |                                          |   |                                           |                |                                      |                           |                 |   |                           |               |   |                           |                       |   |                           |                                       |   |                           |       |   |                           |          |   |                           |           |    |                            |               |    |                            |           |    |                            |       |    |                            |         |

|                                                                                                              |                                                                             |                                                                      |                                                                                                                                                                                                                                                                                                                                                                                                                                                                                                                        |
|--------------------------------------------------------------------------------------------------------------|-----------------------------------------------------------------------------|----------------------------------------------------------------------|------------------------------------------------------------------------------------------------------------------------------------------------------------------------------------------------------------------------------------------------------------------------------------------------------------------------------------------------------------------------------------------------------------------------------------------------------------------------------------------------------------------------|
| 1323                                                                                                         | medical_history_qi_complete                                                 | Section Header: <i>Form Status</i><br>Complete?                      | dropdown<br>0 Incomplete<br>1 Unverified<br>2 Complete                                                                                                                                                                                                                                                                                                                                                                                                                                                                 |
| Instrument: <b>Edfloor Preceding 8 Hrs Interventions T (QI)</b> (edfloor_preceding_8_hrs_interventions_t_qi) |                                                                             |                                                                      |                                                                                                                                                                                                                                                                                                                                                                                                                                                                                                                        |
| 1324                                                                                                         | time_icu_t_v2                                                               | Date of ICU admission                                                | text (date_dmy)                                                                                                                                                                                                                                                                                                                                                                                                                                                                                                        |
| 1325                                                                                                         | total_volume_of_fluid_t_v2                                                  | Total Volume of Fluid (mL)                                           | text                                                                                                                                                                                                                                                                                                                                                                                                                                                                                                                   |
| 1326                                                                                                         | vaso_ed_t_v2                                                                | Was the patient started on vasopressors in ED/Floor?                 | yesno<br>1 Yes<br>0 No                                                                                                                                                                                                                                                                                                                                                                                                                                                                                                 |
| 1327                                                                                                         | ventilation_t_v2                                                            | Was the patient started on mechanical ventilation in the ED/Floor?   | yesno<br>1 Yes<br>0 No                                                                                                                                                                                                                                                                                                                                                                                                                                                                                                 |
| 1328                                                                                                         | niv_t_v2                                                                    | Was the patient started on non invasive ventilation in the ED/Floor? | yesno<br>1 Yes<br>0 No                                                                                                                                                                                                                                                                                                                                                                                                                                                                                                 |
| 1329                                                                                                         | ams_previos_8hr_t_v2                                                        | Did the patient have an altered mental status?                       | yesno<br>1 Yes<br>0 No                                                                                                                                                                                                                                                                                                                                                                                                                                                                                                 |
| 1330                                                                                                         | edfloor_preceding_8_hrs_interventions_t_qi_complete                         | Section Header: <i>Form Status</i><br>Complete?                      | dropdown<br>0 Incomplete<br>1 Unverified<br>2 Complete                                                                                                                                                                                                                                                                                                                                                                                                                                                                 |
| Instrument: <b>Sepsis spectrum (QI)</b> (sepsis_spectrum_qi)                                                 |                                                                             |                                                                      |                                                                                                                                                                                                                                                                                                                                                                                                                                                                                                                        |
| 1331                                                                                                         | sirs_v2                                                                     | SIRS?                                                                | dropdown<br>1 Yes<br>0 No                                                                                                                                                                                                                                                                                                                                                                                                                                                                                              |
| 1332                                                                                                         | sepsis_suspicion_v2                                                         | Sepsis suspicion?                                                    | dropdown<br>1 Yes<br>0 No                                                                                                                                                                                                                                                                                                                                                                                                                                                                                              |
| 1333                                                                                                         | sepsis_general_v2<br>Show the field ONLY if:<br>[sepsis_suspicion_v2] = '1' | General variables                                                    | checkbox<br>1 sepsis_general_v2__1 Fever (> 38.3°C)<br>2 sepsis_general_v2__2 Hypothermia (core temperature < 36°C)<br>3 sepsis_general_v2__3 Heart rate > 90/min-1 or more than two sd above the normal value for age<br>4 sepsis_general_v2__4 Tachypnea<br>5 sepsis_general_v2__5 Altered mental status<br>6 sepsis_general_v2__6 Significant edema or positive fluid balance (> 20 mL/kg over 24 hr)<br>7 sepsis_general_v2__7 Hyperglycemia (plasma glucose > 140 mg/dL or 7.7 mmol/L) in the absence of diabetes |

|             |                                                                                                 |                                                                                                                                         |                                                                                                                                                                                                                                                                                                                                                                                                                                                                                                                                                                                                                                                                                                                                                                                                                                                                                                                                                                                                                                                                                                                                                                                                                                                                                                                                                                                                                                                                                                                                                                             |   |                              |                                                                                                                                         |                   |                              |                                                                                                      |   |                              |                                                       |                        |                              |                                                                   |   |                              |                                                              |       |                      |                                                  |   |                      |                                                                    |
|-------------|-------------------------------------------------------------------------------------------------|-----------------------------------------------------------------------------------------------------------------------------------------|-----------------------------------------------------------------------------------------------------------------------------------------------------------------------------------------------------------------------------------------------------------------------------------------------------------------------------------------------------------------------------------------------------------------------------------------------------------------------------------------------------------------------------------------------------------------------------------------------------------------------------------------------------------------------------------------------------------------------------------------------------------------------------------------------------------------------------------------------------------------------------------------------------------------------------------------------------------------------------------------------------------------------------------------------------------------------------------------------------------------------------------------------------------------------------------------------------------------------------------------------------------------------------------------------------------------------------------------------------------------------------------------------------------------------------------------------------------------------------------------------------------------------------------------------------------------------------|---|------------------------------|-----------------------------------------------------------------------------------------------------------------------------------------|-------------------|------------------------------|------------------------------------------------------------------------------------------------------|---|------------------------------|-------------------------------------------------------|------------------------|------------------------------|-------------------------------------------------------------------|---|------------------------------|--------------------------------------------------------------|-------|----------------------|--------------------------------------------------|---|----------------------|--------------------------------------------------------------------|
| <p>1334</p> | <p>inflammatory_variables_v2</p> <p>Show the field ONLY if:<br/>[sepsis_suspicion_v2] = '1'</p> | <p>Inflammatory variables</p>                                                                                                           | <p>checkbox</p> <table border="1"> <tr> <td data-bbox="1040 100 1062 128">1</td> <td data-bbox="1062 100 1312 128">inflammatory_variables_v2__1</td> <td data-bbox="1312 100 1521 128">Leukocytosis (WBC count &gt; 12,000 ?L-1)</td> </tr> <tr> <td data-bbox="1040 163 1062 191">2</td> <td data-bbox="1062 163 1312 191">inflammatory_variables_v2__2</td> <td data-bbox="1312 163 1521 191">Leukopenia (WBC count &lt; 4000 ?L-1)</td> </tr> <tr> <td data-bbox="1040 226 1062 254">3</td> <td data-bbox="1062 226 1312 254">inflammatory_variables_v2__3</td> <td data-bbox="1312 226 1521 254">Normal WBC count with greater than 10% immature forms</td> </tr> <tr> <td data-bbox="1040 289 1062 317">4</td> <td data-bbox="1062 289 1312 317">inflammatory_variables_v2__4</td> <td data-bbox="1312 289 1521 317">Plasma C-reactive protein more than two sd above the normal value</td> </tr> <tr> <td data-bbox="1040 352 1062 380">5</td> <td data-bbox="1062 352 1312 380">inflammatory_variables_v2__5</td> <td data-bbox="1312 352 1521 380">Plasma procalcitonin more than two sd above the normal value</td> </tr> </table>                                                                                                                                                                                                                                                                                                                                                                                                                                 | 1 | inflammatory_variables_v2__1 | Leukocytosis (WBC count > 12,000 ?L-1)                                                                                                  | 2                 | inflammatory_variables_v2__2 | Leukopenia (WBC count < 4000 ?L-1)                                                                   | 3 | inflammatory_variables_v2__3 | Normal WBC count with greater than 10% immature forms | 4                      | inflammatory_variables_v2__4 | Plasma C-reactive protein more than two sd above the normal value | 5 | inflammatory_variables_v2__5 | Plasma procalcitonin more than two sd above the normal value |       |                      |                                                  |   |                      |                                                                    |
| 1           | inflammatory_variables_v2__1                                                                    | Leukocytosis (WBC count > 12,000 ?L-1)                                                                                                  |                                                                                                                                                                                                                                                                                                                                                                                                                                                                                                                                                                                                                                                                                                                                                                                                                                                                                                                                                                                                                                                                                                                                                                                                                                                                                                                                                                                                                                                                                                                                                                             |   |                              |                                                                                                                                         |                   |                              |                                                                                                      |   |                              |                                                       |                        |                              |                                                                   |   |                              |                                                              |       |                      |                                                  |   |                      |                                                                    |
| 2           | inflammatory_variables_v2__2                                                                    | Leukopenia (WBC count < 4000 ?L-1)                                                                                                      |                                                                                                                                                                                                                                                                                                                                                                                                                                                                                                                                                                                                                                                                                                                                                                                                                                                                                                                                                                                                                                                                                                                                                                                                                                                                                                                                                                                                                                                                                                                                                                             |   |                              |                                                                                                                                         |                   |                              |                                                                                                      |   |                              |                                                       |                        |                              |                                                                   |   |                              |                                                              |       |                      |                                                  |   |                      |                                                                    |
| 3           | inflammatory_variables_v2__3                                                                    | Normal WBC count with greater than 10% immature forms                                                                                   |                                                                                                                                                                                                                                                                                                                                                                                                                                                                                                                                                                                                                                                                                                                                                                                                                                                                                                                                                                                                                                                                                                                                                                                                                                                                                                                                                                                                                                                                                                                                                                             |   |                              |                                                                                                                                         |                   |                              |                                                                                                      |   |                              |                                                       |                        |                              |                                                                   |   |                              |                                                              |       |                      |                                                  |   |                      |                                                                    |
| 4           | inflammatory_variables_v2__4                                                                    | Plasma C-reactive protein more than two sd above the normal value                                                                       |                                                                                                                                                                                                                                                                                                                                                                                                                                                                                                                                                                                                                                                                                                                                                                                                                                                                                                                                                                                                                                                                                                                                                                                                                                                                                                                                                                                                                                                                                                                                                                             |   |                              |                                                                                                                                         |                   |                              |                                                                                                      |   |                              |                                                       |                        |                              |                                                                   |   |                              |                                                              |       |                      |                                                  |   |                      |                                                                    |
| 5           | inflammatory_variables_v2__5                                                                    | Plasma procalcitonin more than two sd above the normal value                                                                            |                                                                                                                                                                                                                                                                                                                                                                                                                                                                                                                                                                                                                                                                                                                                                                                                                                                                                                                                                                                                                                                                                                                                                                                                                                                                                                                                                                                                                                                                                                                                                                             |   |                              |                                                                                                                                         |                   |                              |                                                                                                      |   |                              |                                                       |                        |                              |                                                                   |   |                              |                                                              |       |                      |                                                  |   |                      |                                                                    |
| <p>1335</p> | <p>hemodynamic_v2</p> <p>Show the field ONLY if:<br/>[sepsis_suspicion_v2] = '1'</p>            | <p>Hemodynamic variables</p>                                                                                                            | <p>checkbox</p> <table border="1"> <tr> <td data-bbox="1040 529 1062 556">1</td> <td data-bbox="1062 529 1252 556">hemodynamic_v2__1</td> <td data-bbox="1252 529 1521 556">Arterial hypotension (SBP &lt; 90 mm Hg, MAP &lt; 70 mm Hg, or an SBP decrease &gt; 40 mm Hg in adults or less than two sd below normal for age)</td> </tr> </table>                                                                                                                                                                                                                                                                                                                                                                                                                                                                                                                                                                                                                                                                                                                                                                                                                                                                                                                                                                                                                                                                                                                                                                                                                            | 1 | hemodynamic_v2__1            | Arterial hypotension (SBP < 90 mm Hg, MAP < 70 mm Hg, or an SBP decrease > 40 mm Hg in adults or less than two sd below normal for age) |                   |                              |                                                                                                      |   |                              |                                                       |                        |                              |                                                                   |   |                              |                                                              |       |                      |                                                  |   |                      |                                                                    |
| 1           | hemodynamic_v2__1                                                                               | Arterial hypotension (SBP < 90 mm Hg, MAP < 70 mm Hg, or an SBP decrease > 40 mm Hg in adults or less than two sd below normal for age) |                                                                                                                                                                                                                                                                                                                                                                                                                                                                                                                                                                                                                                                                                                                                                                                                                                                                                                                                                                                                                                                                                                                                                                                                                                                                                                                                                                                                                                                                                                                                                                             |   |                              |                                                                                                                                         |                   |                              |                                                                                                      |   |                              |                                                       |                        |                              |                                                                   |   |                              |                                                              |       |                      |                                                  |   |                      |                                                                    |
| <p>1336</p> | <p>organ_dysfunct_v2</p> <p>Show the field ONLY if:<br/>[sepsis_suspicion_v2] = '1'</p>         | <p>Organ dysfunction variables</p>                                                                                                      | <p>checkbox</p> <table border="1"> <tr> <td data-bbox="1040 697 1062 724">1</td> <td data-bbox="1062 697 1252 724">organ_dysfunct_v2__1</td> <td data-bbox="1252 697 1521 724">Arterial hypoxemia (Pao2/Fio2 &lt; 300)</td> </tr> <tr> <td data-bbox="1040 760 1062 787">2</td> <td data-bbox="1062 760 1252 787">organ_dysfunct_v2__2</td> <td data-bbox="1252 760 1521 787">Acute oliguria (urine output &lt; 0.5 mL/kg/hr for at least 2 hrs despite adequate fluid resuscitation)</td> </tr> <tr> <td data-bbox="1040 823 1062 850">3</td> <td data-bbox="1062 823 1252 850">organ_dysfunct_v2__3</td> <td data-bbox="1252 823 1521 850">Creatinine increase &gt; 0.5 mg/dL or 44.2 ?mol/L</td> </tr> <tr> <td data-bbox="1040 886 1062 913">4</td> <td data-bbox="1062 886 1252 913">organ_dysfunct_v2__4</td> <td data-bbox="1252 886 1521 913">Coagulation abnormalities (INR &gt; 1.5 or aPTT &gt; 60 s)</td> </tr> <tr> <td data-bbox="1040 949 1062 976">5</td> <td data-bbox="1062 949 1252 976">organ_dysfunct_v2__5</td> <td data-bbox="1252 949 1521 976">Ileus (absent bowel sounds)</td> </tr> <tr> <td data-bbox="1040 1012 1062 1039">6</td> <td data-bbox="1062 1012 1252 1039">organ_dysfunct_v2__6</td> <td data-bbox="1252 1012 1521 1039">Thrombocytopenia (platelet count &lt; 100,000 ?L-1)</td> </tr> <tr> <td data-bbox="1040 1075 1062 1102">7</td> <td data-bbox="1062 1075 1252 1102">organ_dysfunct_v2__7</td> <td data-bbox="1252 1075 1521 1102">Hyperbilirubinemia (plasma total bilirubin &gt; 4 mg/dL or 70 ?mol/L)</td> </tr> </table> | 1 | organ_dysfunct_v2__1         | Arterial hypoxemia (Pao2/Fio2 < 300)                                                                                                    | 2                 | organ_dysfunct_v2__2         | Acute oliguria (urine output < 0.5 mL/kg/hr for at least 2 hrs despite adequate fluid resuscitation) | 3 | organ_dysfunct_v2__3         | Creatinine increase > 0.5 mg/dL or 44.2 ?mol/L        | 4                      | organ_dysfunct_v2__4         | Coagulation abnormalities (INR > 1.5 or aPTT > 60 s)              | 5 | organ_dysfunct_v2__5         | Ileus (absent bowel sounds)                                  | 6     | organ_dysfunct_v2__6 | Thrombocytopenia (platelet count < 100,000 ?L-1) | 7 | organ_dysfunct_v2__7 | Hyperbilirubinemia (plasma total bilirubin > 4 mg/dL or 70 ?mol/L) |
| 1           | organ_dysfunct_v2__1                                                                            | Arterial hypoxemia (Pao2/Fio2 < 300)                                                                                                    |                                                                                                                                                                                                                                                                                                                                                                                                                                                                                                                                                                                                                                                                                                                                                                                                                                                                                                                                                                                                                                                                                                                                                                                                                                                                                                                                                                                                                                                                                                                                                                             |   |                              |                                                                                                                                         |                   |                              |                                                                                                      |   |                              |                                                       |                        |                              |                                                                   |   |                              |                                                              |       |                      |                                                  |   |                      |                                                                    |
| 2           | organ_dysfunct_v2__2                                                                            | Acute oliguria (urine output < 0.5 mL/kg/hr for at least 2 hrs despite adequate fluid resuscitation)                                    |                                                                                                                                                                                                                                                                                                                                                                                                                                                                                                                                                                                                                                                                                                                                                                                                                                                                                                                                                                                                                                                                                                                                                                                                                                                                                                                                                                                                                                                                                                                                                                             |   |                              |                                                                                                                                         |                   |                              |                                                                                                      |   |                              |                                                       |                        |                              |                                                                   |   |                              |                                                              |       |                      |                                                  |   |                      |                                                                    |
| 3           | organ_dysfunct_v2__3                                                                            | Creatinine increase > 0.5 mg/dL or 44.2 ?mol/L                                                                                          |                                                                                                                                                                                                                                                                                                                                                                                                                                                                                                                                                                                                                                                                                                                                                                                                                                                                                                                                                                                                                                                                                                                                                                                                                                                                                                                                                                                                                                                                                                                                                                             |   |                              |                                                                                                                                         |                   |                              |                                                                                                      |   |                              |                                                       |                        |                              |                                                                   |   |                              |                                                              |       |                      |                                                  |   |                      |                                                                    |
| 4           | organ_dysfunct_v2__4                                                                            | Coagulation abnormalities (INR > 1.5 or aPTT > 60 s)                                                                                    |                                                                                                                                                                                                                                                                                                                                                                                                                                                                                                                                                                                                                                                                                                                                                                                                                                                                                                                                                                                                                                                                                                                                                                                                                                                                                                                                                                                                                                                                                                                                                                             |   |                              |                                                                                                                                         |                   |                              |                                                                                                      |   |                              |                                                       |                        |                              |                                                                   |   |                              |                                                              |       |                      |                                                  |   |                      |                                                                    |
| 5           | organ_dysfunct_v2__5                                                                            | Ileus (absent bowel sounds)                                                                                                             |                                                                                                                                                                                                                                                                                                                                                                                                                                                                                                                                                                                                                                                                                                                                                                                                                                                                                                                                                                                                                                                                                                                                                                                                                                                                                                                                                                                                                                                                                                                                                                             |   |                              |                                                                                                                                         |                   |                              |                                                                                                      |   |                              |                                                       |                        |                              |                                                                   |   |                              |                                                              |       |                      |                                                  |   |                      |                                                                    |
| 6           | organ_dysfunct_v2__6                                                                            | Thrombocytopenia (platelet count < 100,000 ?L-1)                                                                                        |                                                                                                                                                                                                                                                                                                                                                                                                                                                                                                                                                                                                                                                                                                                                                                                                                                                                                                                                                                                                                                                                                                                                                                                                                                                                                                                                                                                                                                                                                                                                                                             |   |                              |                                                                                                                                         |                   |                              |                                                                                                      |   |                              |                                                       |                        |                              |                                                                   |   |                              |                                                              |       |                      |                                                  |   |                      |                                                                    |
| 7           | organ_dysfunct_v2__7                                                                            | Hyperbilirubinemia (plasma total bilirubin > 4 mg/dL or 70 ?mol/L)                                                                      |                                                                                                                                                                                                                                                                                                                                                                                                                                                                                                                                                                                                                                                                                                                                                                                                                                                                                                                                                                                                                                                                                                                                                                                                                                                                                                                                                                                                                                                                                                                                                                             |   |                              |                                                                                                                                         |                   |                              |                                                                                                      |   |                              |                                                       |                        |                              |                                                                   |   |                              |                                                              |       |                      |                                                  |   |                      |                                                                    |
| <p>1337</p> | <p>tissue_perfusion_v2</p> <p>Show the field ONLY if:<br/>[sepsis_suspicion_v2] = '1'</p>       | <p>Tissue perfusion variables</p>                                                                                                       | <p>checkbox</p> <table border="1"> <tr> <td data-bbox="1040 1201 1062 1228">1</td> <td data-bbox="1062 1201 1252 1228">tissue_perfusion_v2__1</td> <td data-bbox="1252 1201 1521 1228">Hyperlactatemia (&gt; 1 mmol/L)</td> </tr> <tr> <td data-bbox="1040 1243 1062 1270">2</td> <td data-bbox="1062 1243 1252 1270">tissue_perfusion_v2__2</td> <td data-bbox="1252 1243 1521 1270">Decreased capillary refill or mottling</td> </tr> </table>                                                                                                                                                                                                                                                                                                                                                                                                                                                                                                                                                                                                                                                                                                                                                                                                                                                                                                                                                                                                                                                                                                                            | 1 | tissue_perfusion_v2__1       | Hyperlactatemia (> 1 mmol/L)                                                                                                            | 2                 | tissue_perfusion_v2__2       | Decreased capillary refill or mottling                                                               |   |                              |                                                       |                        |                              |                                                                   |   |                              |                                                              |       |                      |                                                  |   |                      |                                                                    |
| 1           | tissue_perfusion_v2__1                                                                          | Hyperlactatemia (> 1 mmol/L)                                                                                                            |                                                                                                                                                                                                                                                                                                                                                                                                                                                                                                                                                                                                                                                                                                                                                                                                                                                                                                                                                                                                                                                                                                                                                                                                                                                                                                                                                                                                                                                                                                                                                                             |   |                              |                                                                                                                                         |                   |                              |                                                                                                      |   |                              |                                                       |                        |                              |                                                                   |   |                              |                                                              |       |                      |                                                  |   |                      |                                                                    |
| 2           | tissue_perfusion_v2__2                                                                          | Decreased capillary refill or mottling                                                                                                  |                                                                                                                                                                                                                                                                                                                                                                                                                                                                                                                                                                                                                                                                                                                                                                                                                                                                                                                                                                                                                                                                                                                                                                                                                                                                                                                                                                                                                                                                                                                                                                             |   |                              |                                                                                                                                         |                   |                              |                                                                                                      |   |                              |                                                       |                        |                              |                                                                   |   |                              |                                                              |       |                      |                                                  |   |                      |                                                                    |
| <p>1338</p> | <p>infection_site_v2</p> <p>Show the field ONLY if:<br/>[sepsis_suspicion_v2] = '1'</p>         | <p>Suspected Infection site</p>                                                                                                         | <p>dropdown</p> <table border="1"> <tr><td data-bbox="1040 1333 1062 1360">1</td><td data-bbox="1062 1333 1252 1360">Skin</td></tr> <tr><td data-bbox="1040 1375 1062 1402">2</td><td data-bbox="1062 1375 1252 1402">Respiratory tract</td></tr> <tr><td data-bbox="1040 1417 1062 1444">3</td><td data-bbox="1062 1417 1252 1444">Neurologic</td></tr> <tr><td data-bbox="1040 1459 1062 1486">4</td><td data-bbox="1062 1459 1252 1486">Genitourinary</td></tr> <tr><td data-bbox="1040 1501 1062 1528">5</td><td data-bbox="1062 1501 1252 1528">Gastrointestinal tract</td></tr> <tr><td data-bbox="1040 1543 1062 1570">6</td><td data-bbox="1062 1543 1252 1570">Endocarditis</td></tr> <tr><td data-bbox="1040 1585 1062 1612">7</td><td data-bbox="1062 1585 1252 1612">Unknown</td></tr> </table>                                                                                                                                                                                                                                                                                                                                                                                                                                                                                                                                                                                                                                                                                                                                                                 | 1 | Skin                         | 2                                                                                                                                       | Respiratory tract | 3                            | Neurologic                                                                                           | 4 | Genitourinary                | 5                                                     | Gastrointestinal tract | 6                            | Endocarditis                                                      | 7 | Unknown                      |                                                              |       |                      |                                                  |   |                      |                                                                    |
| 1           | Skin                                                                                            |                                                                                                                                         |                                                                                                                                                                                                                                                                                                                                                                                                                                                                                                                                                                                                                                                                                                                                                                                                                                                                                                                                                                                                                                                                                                                                                                                                                                                                                                                                                                                                                                                                                                                                                                             |   |                              |                                                                                                                                         |                   |                              |                                                                                                      |   |                              |                                                       |                        |                              |                                                                   |   |                              |                                                              |       |                      |                                                  |   |                      |                                                                    |
| 2           | Respiratory tract                                                                               |                                                                                                                                         |                                                                                                                                                                                                                                                                                                                                                                                                                                                                                                                                                                                                                                                                                                                                                                                                                                                                                                                                                                                                                                                                                                                                                                                                                                                                                                                                                                                                                                                                                                                                                                             |   |                              |                                                                                                                                         |                   |                              |                                                                                                      |   |                              |                                                       |                        |                              |                                                                   |   |                              |                                                              |       |                      |                                                  |   |                      |                                                                    |
| 3           | Neurologic                                                                                      |                                                                                                                                         |                                                                                                                                                                                                                                                                                                                                                                                                                                                                                                                                                                                                                                                                                                                                                                                                                                                                                                                                                                                                                                                                                                                                                                                                                                                                                                                                                                                                                                                                                                                                                                             |   |                              |                                                                                                                                         |                   |                              |                                                                                                      |   |                              |                                                       |                        |                              |                                                                   |   |                              |                                                              |       |                      |                                                  |   |                      |                                                                    |
| 4           | Genitourinary                                                                                   |                                                                                                                                         |                                                                                                                                                                                                                                                                                                                                                                                                                                                                                                                                                                                                                                                                                                                                                                                                                                                                                                                                                                                                                                                                                                                                                                                                                                                                                                                                                                                                                                                                                                                                                                             |   |                              |                                                                                                                                         |                   |                              |                                                                                                      |   |                              |                                                       |                        |                              |                                                                   |   |                              |                                                              |       |                      |                                                  |   |                      |                                                                    |
| 5           | Gastrointestinal tract                                                                          |                                                                                                                                         |                                                                                                                                                                                                                                                                                                                                                                                                                                                                                                                                                                                                                                                                                                                                                                                                                                                                                                                                                                                                                                                                                                                                                                                                                                                                                                                                                                                                                                                                                                                                                                             |   |                              |                                                                                                                                         |                   |                              |                                                                                                      |   |                              |                                                       |                        |                              |                                                                   |   |                              |                                                              |       |                      |                                                  |   |                      |                                                                    |
| 6           | Endocarditis                                                                                    |                                                                                                                                         |                                                                                                                                                                                                                                                                                                                                                                                                                                                                                                                                                                                                                                                                                                                                                                                                                                                                                                                                                                                                                                                                                                                                                                                                                                                                                                                                                                                                                                                                                                                                                                             |   |                              |                                                                                                                                         |                   |                              |                                                                                                      |   |                              |                                                       |                        |                              |                                                                   |   |                              |                                                              |       |                      |                                                  |   |                      |                                                                    |
| 7           | Unknown                                                                                         |                                                                                                                                         |                                                                                                                                                                                                                                                                                                                                                                                                                                                                                                                                                                                                                                                                                                                                                                                                                                                                                                                                                                                                                                                                                                                                                                                                                                                                                                                                                                                                                                                                                                                                                                             |   |                              |                                                                                                                                         |                   |                              |                                                                                                      |   |                              |                                                       |                        |                              |                                                                   |   |                              |                                                              |       |                      |                                                  |   |                      |                                                                    |
| <p>1339</p> | <p>culture_v2</p>                                                                               | <p>Positive culture?</p>                                                                                                                | <p>dropdown</p> <table border="1"> <tr><td data-bbox="1040 1621 1062 1648">0</td><td data-bbox="1062 1621 1252 1648">No</td></tr> <tr><td data-bbox="1040 1663 1062 1690">1</td><td data-bbox="1062 1663 1252 1690">Blood</td></tr> <tr><td data-bbox="1040 1705 1062 1732">2</td><td data-bbox="1062 1705 1252 1732">Urine</td></tr> <tr><td data-bbox="1040 1747 1062 1774">3</td><td data-bbox="1062 1747 1252 1774">Respiratory tract</td></tr> <tr><td data-bbox="1040 1789 1062 1816">4</td><td data-bbox="1062 1789 1252 1816">Pleura</td></tr> <tr><td data-bbox="1040 1831 1062 1858">5</td><td data-bbox="1062 1831 1252 1858">Peritoneal</td></tr> <tr><td data-bbox="1040 1873 1062 1900">6</td><td data-bbox="1062 1873 1252 1900">Skin</td></tr> <tr><td data-bbox="1040 1915 1062 1942">7</td><td data-bbox="1062 1915 1252 1942">Stool</td></tr> <tr><td data-bbox="1040 1957 1062 1984">8</td><td data-bbox="1062 1957 1252 1984">CSF</td></tr> <tr><td data-bbox="1040 1999 1062 2026">9</td><td data-bbox="1062 1999 1252 2026">Gynecologic tract</td></tr> </table>                                                                                                                                                                                                                                                                                                                                                                                                                                                                                     | 0 | No                           | 1                                                                                                                                       | Blood             | 2                            | Urine                                                                                                | 3 | Respiratory tract            | 4                                                     | Pleura                 | 5                            | Peritoneal                                                        | 6 | Skin                         | 7                                                            | Stool | 8                    | CSF                                              | 9 | Gynecologic tract    |                                                                    |
| 0           | No                                                                                              |                                                                                                                                         |                                                                                                                                                                                                                                                                                                                                                                                                                                                                                                                                                                                                                                                                                                                                                                                                                                                                                                                                                                                                                                                                                                                                                                                                                                                                                                                                                                                                                                                                                                                                                                             |   |                              |                                                                                                                                         |                   |                              |                                                                                                      |   |                              |                                                       |                        |                              |                                                                   |   |                              |                                                              |       |                      |                                                  |   |                      |                                                                    |
| 1           | Blood                                                                                           |                                                                                                                                         |                                                                                                                                                                                                                                                                                                                                                                                                                                                                                                                                                                                                                                                                                                                                                                                                                                                                                                                                                                                                                                                                                                                                                                                                                                                                                                                                                                                                                                                                                                                                                                             |   |                              |                                                                                                                                         |                   |                              |                                                                                                      |   |                              |                                                       |                        |                              |                                                                   |   |                              |                                                              |       |                      |                                                  |   |                      |                                                                    |
| 2           | Urine                                                                                           |                                                                                                                                         |                                                                                                                                                                                                                                                                                                                                                                                                                                                                                                                                                                                                                                                                                                                                                                                                                                                                                                                                                                                                                                                                                                                                                                                                                                                                                                                                                                                                                                                                                                                                                                             |   |                              |                                                                                                                                         |                   |                              |                                                                                                      |   |                              |                                                       |                        |                              |                                                                   |   |                              |                                                              |       |                      |                                                  |   |                      |                                                                    |
| 3           | Respiratory tract                                                                               |                                                                                                                                         |                                                                                                                                                                                                                                                                                                                                                                                                                                                                                                                                                                                                                                                                                                                                                                                                                                                                                                                                                                                                                                                                                                                                                                                                                                                                                                                                                                                                                                                                                                                                                                             |   |                              |                                                                                                                                         |                   |                              |                                                                                                      |   |                              |                                                       |                        |                              |                                                                   |   |                              |                                                              |       |                      |                                                  |   |                      |                                                                    |
| 4           | Pleura                                                                                          |                                                                                                                                         |                                                                                                                                                                                                                                                                                                                                                                                                                                                                                                                                                                                                                                                                                                                                                                                                                                                                                                                                                                                                                                                                                                                                                                                                                                                                                                                                                                                                                                                                                                                                                                             |   |                              |                                                                                                                                         |                   |                              |                                                                                                      |   |                              |                                                       |                        |                              |                                                                   |   |                              |                                                              |       |                      |                                                  |   |                      |                                                                    |
| 5           | Peritoneal                                                                                      |                                                                                                                                         |                                                                                                                                                                                                                                                                                                                                                                                                                                                                                                                                                                                                                                                                                                                                                                                                                                                                                                                                                                                                                                                                                                                                                                                                                                                                                                                                                                                                                                                                                                                                                                             |   |                              |                                                                                                                                         |                   |                              |                                                                                                      |   |                              |                                                       |                        |                              |                                                                   |   |                              |                                                              |       |                      |                                                  |   |                      |                                                                    |
| 6           | Skin                                                                                            |                                                                                                                                         |                                                                                                                                                                                                                                                                                                                                                                                                                                                                                                                                                                                                                                                                                                                                                                                                                                                                                                                                                                                                                                                                                                                                                                                                                                                                                                                                                                                                                                                                                                                                                                             |   |                              |                                                                                                                                         |                   |                              |                                                                                                      |   |                              |                                                       |                        |                              |                                                                   |   |                              |                                                              |       |                      |                                                  |   |                      |                                                                    |
| 7           | Stool                                                                                           |                                                                                                                                         |                                                                                                                                                                                                                                                                                                                                                                                                                                                                                                                                                                                                                                                                                                                                                                                                                                                                                                                                                                                                                                                                                                                                                                                                                                                                                                                                                                                                                                                                                                                                                                             |   |                              |                                                                                                                                         |                   |                              |                                                                                                      |   |                              |                                                       |                        |                              |                                                                   |   |                              |                                                              |       |                      |                                                  |   |                      |                                                                    |
| 8           | CSF                                                                                             |                                                                                                                                         |                                                                                                                                                                                                                                                                                                                                                                                                                                                                                                                                                                                                                                                                                                                                                                                                                                                                                                                                                                                                                                                                                                                                                                                                                                                                                                                                                                                                                                                                                                                                                                             |   |                              |                                                                                                                                         |                   |                              |                                                                                                      |   |                              |                                                       |                        |                              |                                                                   |   |                              |                                                              |       |                      |                                                  |   |                      |                                                                    |
| 9           | Gynecologic tract                                                                               |                                                                                                                                         |                                                                                                                                                                                                                                                                                                                                                                                                                                                                                                                                                                                                                                                                                                                                                                                                                                                                                                                                                                                                                                                                                                                                                                                                                                                                                                                                                                                                                                                                                                                                                                             |   |                              |                                                                                                                                         |                   |                              |                                                                                                      |   |                              |                                                       |                        |                              |                                                                   |   |                              |                                                              |       |                      |                                                  |   |                      |                                                                    |

|      |                                                                                                                                                                                                                                                               |                        |                                                                                                                                                                                                                                                                                                                                                                                                                                                                                                                                                                                                                                                                                                                                                                                                                                                                                                                        |   |                              |   |                              |   |                              |   |                            |   |                                    |   |                          |   |                        |   |                         |   |                        |    |                               |    |                      |    |                     |    |                    |    |                  |    |                                       |    |                  |    |                             |
|------|---------------------------------------------------------------------------------------------------------------------------------------------------------------------------------------------------------------------------------------------------------------|------------------------|------------------------------------------------------------------------------------------------------------------------------------------------------------------------------------------------------------------------------------------------------------------------------------------------------------------------------------------------------------------------------------------------------------------------------------------------------------------------------------------------------------------------------------------------------------------------------------------------------------------------------------------------------------------------------------------------------------------------------------------------------------------------------------------------------------------------------------------------------------------------------------------------------------------------|---|------------------------------|---|------------------------------|---|------------------------------|---|----------------------------|---|------------------------------------|---|--------------------------|---|------------------------|---|-------------------------|---|------------------------|----|-------------------------------|----|----------------------|----|---------------------|----|--------------------|----|------------------|----|---------------------------------------|----|------------------|----|-----------------------------|
| 1340 | <p>microorganism_v2</p> <p>Show the field ONLY if:<br/>[culture_v2] = '1' or [culture_v2] = '2' or [culture_v2] = '3' or [culture_v2] = '4' or [culture_v2] = '5' or [culture_v2] = '6' or [culture_v2] = '7' or [culture_v2] = '8' or [culture_v2] = '9'</p> | Microorganism isolated | <p>dropdown</p> <table border="1"> <tr><td>1</td><td>Gram positive bacteria</td></tr> <tr><td>2</td><td>Gram negative bacteria</td></tr> <tr><td>3</td><td>Anaerobic bacteria</td></tr> <tr><td>4</td><td>Mycobacteria</td></tr> <tr><td>5</td><td>Fungal</td></tr> <tr><td>6</td><td>Virus</td></tr> </table>                                                                                                                                                                                                                                                                                                                                                                                                                                                                                                                                                                                                         | 1 | Gram positive bacteria       | 2 | Gram negative bacteria       | 3 | Anaerobic bacteria           | 4 | Mycobacteria               | 5 | Fungal                             | 6 | Virus                    |   |                        |   |                         |   |                        |    |                               |    |                      |    |                     |    |                    |    |                  |    |                                       |    |                  |    |                             |
| 1    | Gram positive bacteria                                                                                                                                                                                                                                        |                        |                                                                                                                                                                                                                                                                                                                                                                                                                                                                                                                                                                                                                                                                                                                                                                                                                                                                                                                        |   |                              |   |                              |   |                              |   |                            |   |                                    |   |                          |   |                        |   |                         |   |                        |    |                               |    |                      |    |                     |    |                    |    |                  |    |                                       |    |                  |    |                             |
| 2    | Gram negative bacteria                                                                                                                                                                                                                                        |                        |                                                                                                                                                                                                                                                                                                                                                                                                                                                                                                                                                                                                                                                                                                                                                                                                                                                                                                                        |   |                              |   |                              |   |                              |   |                            |   |                                    |   |                          |   |                        |   |                         |   |                        |    |                               |    |                      |    |                     |    |                    |    |                  |    |                                       |    |                  |    |                             |
| 3    | Anaerobic bacteria                                                                                                                                                                                                                                            |                        |                                                                                                                                                                                                                                                                                                                                                                                                                                                                                                                                                                                                                                                                                                                                                                                                                                                                                                                        |   |                              |   |                              |   |                              |   |                            |   |                                    |   |                          |   |                        |   |                         |   |                        |    |                               |    |                      |    |                     |    |                    |    |                  |    |                                       |    |                  |    |                             |
| 4    | Mycobacteria                                                                                                                                                                                                                                                  |                        |                                                                                                                                                                                                                                                                                                                                                                                                                                                                                                                                                                                                                                                                                                                                                                                                                                                                                                                        |   |                              |   |                              |   |                              |   |                            |   |                                    |   |                          |   |                        |   |                         |   |                        |    |                               |    |                      |    |                     |    |                    |    |                  |    |                                       |    |                  |    |                             |
| 5    | Fungal                                                                                                                                                                                                                                                        |                        |                                                                                                                                                                                                                                                                                                                                                                                                                                                                                                                                                                                                                                                                                                                                                                                                                                                                                                                        |   |                              |   |                              |   |                              |   |                            |   |                                    |   |                          |   |                        |   |                         |   |                        |    |                               |    |                      |    |                     |    |                    |    |                  |    |                                       |    |                  |    |                             |
| 6    | Virus                                                                                                                                                                                                                                                         |                        |                                                                                                                                                                                                                                                                                                                                                                                                                                                                                                                                                                                                                                                                                                                                                                                                                                                                                                                        |   |                              |   |                              |   |                              |   |                            |   |                                    |   |                          |   |                        |   |                         |   |                        |    |                               |    |                      |    |                     |    |                    |    |                  |    |                                       |    |                  |    |                             |
| 1341 | <p>gram_positive_bacteria_v2</p> <p>Show the field ONLY if:<br/>[microorganism_v2] = '1'</p>                                                                                                                                                                  | Gram positive bacteria | <p>dropdown</p> <table border="1"> <tr><td>1</td><td>Staphylococcus aureus (MSSA)</td></tr> <tr><td>2</td><td>Staphylococcus aureus (MRSA)</td></tr> <tr><td>3</td><td>Staphylococcus aureus (VRSA)</td></tr> <tr><td>4</td><td>Staphylococcus epidermidis</td></tr> <tr><td>5</td><td>Other Staphylococcus coagulase neg</td></tr> <tr><td>6</td><td>Streptococcus pneumoniae</td></tr> <tr><td>7</td><td>Streptococcus pyogenes</td></tr> <tr><td>8</td><td>Streptococcus agalactie</td></tr> <tr><td>9</td><td>Streptococcus viridans</td></tr> <tr><td>10</td><td>Streptococcus, other specises</td></tr> <tr><td>11</td><td>Enterococcus species</td></tr> <tr><td>12</td><td>Other Gram positive</td></tr> </table>                                                                                                                                                                                              | 1 | Staphylococcus aureus (MSSA) | 2 | Staphylococcus aureus (MRSA) | 3 | Staphylococcus aureus (VRSA) | 4 | Staphylococcus epidermidis | 5 | Other Staphylococcus coagulase neg | 6 | Streptococcus pneumoniae | 7 | Streptococcus pyogenes | 8 | Streptococcus agalactie | 9 | Streptococcus viridans | 10 | Streptococcus, other specises | 11 | Enterococcus species | 12 | Other Gram positive |    |                    |    |                  |    |                                       |    |                  |    |                             |
| 1    | Staphylococcus aureus (MSSA)                                                                                                                                                                                                                                  |                        |                                                                                                                                                                                                                                                                                                                                                                                                                                                                                                                                                                                                                                                                                                                                                                                                                                                                                                                        |   |                              |   |                              |   |                              |   |                            |   |                                    |   |                          |   |                        |   |                         |   |                        |    |                               |    |                      |    |                     |    |                    |    |                  |    |                                       |    |                  |    |                             |
| 2    | Staphylococcus aureus (MRSA)                                                                                                                                                                                                                                  |                        |                                                                                                                                                                                                                                                                                                                                                                                                                                                                                                                                                                                                                                                                                                                                                                                                                                                                                                                        |   |                              |   |                              |   |                              |   |                            |   |                                    |   |                          |   |                        |   |                         |   |                        |    |                               |    |                      |    |                     |    |                    |    |                  |    |                                       |    |                  |    |                             |
| 3    | Staphylococcus aureus (VRSA)                                                                                                                                                                                                                                  |                        |                                                                                                                                                                                                                                                                                                                                                                                                                                                                                                                                                                                                                                                                                                                                                                                                                                                                                                                        |   |                              |   |                              |   |                              |   |                            |   |                                    |   |                          |   |                        |   |                         |   |                        |    |                               |    |                      |    |                     |    |                    |    |                  |    |                                       |    |                  |    |                             |
| 4    | Staphylococcus epidermidis                                                                                                                                                                                                                                    |                        |                                                                                                                                                                                                                                                                                                                                                                                                                                                                                                                                                                                                                                                                                                                                                                                                                                                                                                                        |   |                              |   |                              |   |                              |   |                            |   |                                    |   |                          |   |                        |   |                         |   |                        |    |                               |    |                      |    |                     |    |                    |    |                  |    |                                       |    |                  |    |                             |
| 5    | Other Staphylococcus coagulase neg                                                                                                                                                                                                                            |                        |                                                                                                                                                                                                                                                                                                                                                                                                                                                                                                                                                                                                                                                                                                                                                                                                                                                                                                                        |   |                              |   |                              |   |                              |   |                            |   |                                    |   |                          |   |                        |   |                         |   |                        |    |                               |    |                      |    |                     |    |                    |    |                  |    |                                       |    |                  |    |                             |
| 6    | Streptococcus pneumoniae                                                                                                                                                                                                                                      |                        |                                                                                                                                                                                                                                                                                                                                                                                                                                                                                                                                                                                                                                                                                                                                                                                                                                                                                                                        |   |                              |   |                              |   |                              |   |                            |   |                                    |   |                          |   |                        |   |                         |   |                        |    |                               |    |                      |    |                     |    |                    |    |                  |    |                                       |    |                  |    |                             |
| 7    | Streptococcus pyogenes                                                                                                                                                                                                                                        |                        |                                                                                                                                                                                                                                                                                                                                                                                                                                                                                                                                                                                                                                                                                                                                                                                                                                                                                                                        |   |                              |   |                              |   |                              |   |                            |   |                                    |   |                          |   |                        |   |                         |   |                        |    |                               |    |                      |    |                     |    |                    |    |                  |    |                                       |    |                  |    |                             |
| 8    | Streptococcus agalactie                                                                                                                                                                                                                                       |                        |                                                                                                                                                                                                                                                                                                                                                                                                                                                                                                                                                                                                                                                                                                                                                                                                                                                                                                                        |   |                              |   |                              |   |                              |   |                            |   |                                    |   |                          |   |                        |   |                         |   |                        |    |                               |    |                      |    |                     |    |                    |    |                  |    |                                       |    |                  |    |                             |
| 9    | Streptococcus viridans                                                                                                                                                                                                                                        |                        |                                                                                                                                                                                                                                                                                                                                                                                                                                                                                                                                                                                                                                                                                                                                                                                                                                                                                                                        |   |                              |   |                              |   |                              |   |                            |   |                                    |   |                          |   |                        |   |                         |   |                        |    |                               |    |                      |    |                     |    |                    |    |                  |    |                                       |    |                  |    |                             |
| 10   | Streptococcus, other specises                                                                                                                                                                                                                                 |                        |                                                                                                                                                                                                                                                                                                                                                                                                                                                                                                                                                                                                                                                                                                                                                                                                                                                                                                                        |   |                              |   |                              |   |                              |   |                            |   |                                    |   |                          |   |                        |   |                         |   |                        |    |                               |    |                      |    |                     |    |                    |    |                  |    |                                       |    |                  |    |                             |
| 11   | Enterococcus species                                                                                                                                                                                                                                          |                        |                                                                                                                                                                                                                                                                                                                                                                                                                                                                                                                                                                                                                                                                                                                                                                                                                                                                                                                        |   |                              |   |                              |   |                              |   |                            |   |                                    |   |                          |   |                        |   |                         |   |                        |    |                               |    |                      |    |                     |    |                    |    |                  |    |                                       |    |                  |    |                             |
| 12   | Other Gram positive                                                                                                                                                                                                                                           |                        |                                                                                                                                                                                                                                                                                                                                                                                                                                                                                                                                                                                                                                                                                                                                                                                                                                                                                                                        |   |                              |   |                              |   |                              |   |                            |   |                                    |   |                          |   |                        |   |                         |   |                        |    |                               |    |                      |    |                     |    |                    |    |                  |    |                                       |    |                  |    |                             |
| 1342 | <p>gram_neg_bact_v2</p> <p>Show the field ONLY if:<br/>[microorganism_v2] = '2'</p>                                                                                                                                                                           | Gram negative bacteria | <p>dropdown</p> <table border="1"> <tr><td>1</td><td>Escherichia coli</td></tr> <tr><td>2</td><td>Pseudomonas species</td></tr> <tr><td>3</td><td>Hemophilus influenzae</td></tr> <tr><td>4</td><td>Klebsiella species</td></tr> <tr><td>5</td><td>Acinetobacter species</td></tr> <tr><td>6</td><td>Enterobacter species</td></tr> <tr><td>7</td><td>Legionella species</td></tr> <tr><td>8</td><td>Moraxella catarrhalis</td></tr> <tr><td>9</td><td>Morganella species</td></tr> <tr><td>10</td><td>Neisseria meningitides</td></tr> <tr><td>11</td><td>Proteus species</td></tr> <tr><td>12</td><td>Citrobacter species</td></tr> <tr><td>13</td><td>Salmonella species</td></tr> <tr><td>14</td><td>Serratia species</td></tr> <tr><td>15</td><td>Sternotrophomonas/Xanthomonas species</td></tr> <tr><td>16</td><td>Yersinia species</td></tr> <tr><td>17</td><td>Other Gram negative species</td></tr> </table> | 1 | Escherichia coli             | 2 | Pseudomonas species          | 3 | Hemophilus influenzae        | 4 | Klebsiella species         | 5 | Acinetobacter species              | 6 | Enterobacter species     | 7 | Legionella species     | 8 | Moraxella catarrhalis   | 9 | Morganella species     | 10 | Neisseria meningitides        | 11 | Proteus species      | 12 | Citrobacter species | 13 | Salmonella species | 14 | Serratia species | 15 | Sternotrophomonas/Xanthomonas species | 16 | Yersinia species | 17 | Other Gram negative species |
| 1    | Escherichia coli                                                                                                                                                                                                                                              |                        |                                                                                                                                                                                                                                                                                                                                                                                                                                                                                                                                                                                                                                                                                                                                                                                                                                                                                                                        |   |                              |   |                              |   |                              |   |                            |   |                                    |   |                          |   |                        |   |                         |   |                        |    |                               |    |                      |    |                     |    |                    |    |                  |    |                                       |    |                  |    |                             |
| 2    | Pseudomonas species                                                                                                                                                                                                                                           |                        |                                                                                                                                                                                                                                                                                                                                                                                                                                                                                                                                                                                                                                                                                                                                                                                                                                                                                                                        |   |                              |   |                              |   |                              |   |                            |   |                                    |   |                          |   |                        |   |                         |   |                        |    |                               |    |                      |    |                     |    |                    |    |                  |    |                                       |    |                  |    |                             |
| 3    | Hemophilus influenzae                                                                                                                                                                                                                                         |                        |                                                                                                                                                                                                                                                                                                                                                                                                                                                                                                                                                                                                                                                                                                                                                                                                                                                                                                                        |   |                              |   |                              |   |                              |   |                            |   |                                    |   |                          |   |                        |   |                         |   |                        |    |                               |    |                      |    |                     |    |                    |    |                  |    |                                       |    |                  |    |                             |
| 4    | Klebsiella species                                                                                                                                                                                                                                            |                        |                                                                                                                                                                                                                                                                                                                                                                                                                                                                                                                                                                                                                                                                                                                                                                                                                                                                                                                        |   |                              |   |                              |   |                              |   |                            |   |                                    |   |                          |   |                        |   |                         |   |                        |    |                               |    |                      |    |                     |    |                    |    |                  |    |                                       |    |                  |    |                             |
| 5    | Acinetobacter species                                                                                                                                                                                                                                         |                        |                                                                                                                                                                                                                                                                                                                                                                                                                                                                                                                                                                                                                                                                                                                                                                                                                                                                                                                        |   |                              |   |                              |   |                              |   |                            |   |                                    |   |                          |   |                        |   |                         |   |                        |    |                               |    |                      |    |                     |    |                    |    |                  |    |                                       |    |                  |    |                             |
| 6    | Enterobacter species                                                                                                                                                                                                                                          |                        |                                                                                                                                                                                                                                                                                                                                                                                                                                                                                                                                                                                                                                                                                                                                                                                                                                                                                                                        |   |                              |   |                              |   |                              |   |                            |   |                                    |   |                          |   |                        |   |                         |   |                        |    |                               |    |                      |    |                     |    |                    |    |                  |    |                                       |    |                  |    |                             |
| 7    | Legionella species                                                                                                                                                                                                                                            |                        |                                                                                                                                                                                                                                                                                                                                                                                                                                                                                                                                                                                                                                                                                                                                                                                                                                                                                                                        |   |                              |   |                              |   |                              |   |                            |   |                                    |   |                          |   |                        |   |                         |   |                        |    |                               |    |                      |    |                     |    |                    |    |                  |    |                                       |    |                  |    |                             |
| 8    | Moraxella catarrhalis                                                                                                                                                                                                                                         |                        |                                                                                                                                                                                                                                                                                                                                                                                                                                                                                                                                                                                                                                                                                                                                                                                                                                                                                                                        |   |                              |   |                              |   |                              |   |                            |   |                                    |   |                          |   |                        |   |                         |   |                        |    |                               |    |                      |    |                     |    |                    |    |                  |    |                                       |    |                  |    |                             |
| 9    | Morganella species                                                                                                                                                                                                                                            |                        |                                                                                                                                                                                                                                                                                                                                                                                                                                                                                                                                                                                                                                                                                                                                                                                                                                                                                                                        |   |                              |   |                              |   |                              |   |                            |   |                                    |   |                          |   |                        |   |                         |   |                        |    |                               |    |                      |    |                     |    |                    |    |                  |    |                                       |    |                  |    |                             |
| 10   | Neisseria meningitides                                                                                                                                                                                                                                        |                        |                                                                                                                                                                                                                                                                                                                                                                                                                                                                                                                                                                                                                                                                                                                                                                                                                                                                                                                        |   |                              |   |                              |   |                              |   |                            |   |                                    |   |                          |   |                        |   |                         |   |                        |    |                               |    |                      |    |                     |    |                    |    |                  |    |                                       |    |                  |    |                             |
| 11   | Proteus species                                                                                                                                                                                                                                               |                        |                                                                                                                                                                                                                                                                                                                                                                                                                                                                                                                                                                                                                                                                                                                                                                                                                                                                                                                        |   |                              |   |                              |   |                              |   |                            |   |                                    |   |                          |   |                        |   |                         |   |                        |    |                               |    |                      |    |                     |    |                    |    |                  |    |                                       |    |                  |    |                             |
| 12   | Citrobacter species                                                                                                                                                                                                                                           |                        |                                                                                                                                                                                                                                                                                                                                                                                                                                                                                                                                                                                                                                                                                                                                                                                                                                                                                                                        |   |                              |   |                              |   |                              |   |                            |   |                                    |   |                          |   |                        |   |                         |   |                        |    |                               |    |                      |    |                     |    |                    |    |                  |    |                                       |    |                  |    |                             |
| 13   | Salmonella species                                                                                                                                                                                                                                            |                        |                                                                                                                                                                                                                                                                                                                                                                                                                                                                                                                                                                                                                                                                                                                                                                                                                                                                                                                        |   |                              |   |                              |   |                              |   |                            |   |                                    |   |                          |   |                        |   |                         |   |                        |    |                               |    |                      |    |                     |    |                    |    |                  |    |                                       |    |                  |    |                             |
| 14   | Serratia species                                                                                                                                                                                                                                              |                        |                                                                                                                                                                                                                                                                                                                                                                                                                                                                                                                                                                                                                                                                                                                                                                                                                                                                                                                        |   |                              |   |                              |   |                              |   |                            |   |                                    |   |                          |   |                        |   |                         |   |                        |    |                               |    |                      |    |                     |    |                    |    |                  |    |                                       |    |                  |    |                             |
| 15   | Sternotrophomonas/Xanthomonas species                                                                                                                                                                                                                         |                        |                                                                                                                                                                                                                                                                                                                                                                                                                                                                                                                                                                                                                                                                                                                                                                                                                                                                                                                        |   |                              |   |                              |   |                              |   |                            |   |                                    |   |                          |   |                        |   |                         |   |                        |    |                               |    |                      |    |                     |    |                    |    |                  |    |                                       |    |                  |    |                             |
| 16   | Yersinia species                                                                                                                                                                                                                                              |                        |                                                                                                                                                                                                                                                                                                                                                                                                                                                                                                                                                                                                                                                                                                                                                                                                                                                                                                                        |   |                              |   |                              |   |                              |   |                            |   |                                    |   |                          |   |                        |   |                         |   |                        |    |                               |    |                      |    |                     |    |                    |    |                  |    |                                       |    |                  |    |                             |
| 17   | Other Gram negative species                                                                                                                                                                                                                                   |                        |                                                                                                                                                                                                                                                                                                                                                                                                                                                                                                                                                                                                                                                                                                                                                                                                                                                                                                                        |   |                              |   |                              |   |                              |   |                            |   |                                    |   |                          |   |                        |   |                         |   |                        |    |                               |    |                      |    |                     |    |                    |    |                  |    |                                       |    |                  |    |                             |
| 1343 | <p>anaerobic_v2</p> <p>Show the field ONLY if:<br/>[microorganism_v2] = '3'</p>                                                                                                                                                                               | Anaerobic bacteria     | <p>dropdown</p> <table border="1"> <tr><td>1</td><td>Actinomyces species</td></tr> <tr><td>2</td><td>Bacteriodes species</td></tr> <tr><td>3</td><td>Clostridium difficile</td></tr> <tr><td>4</td><td>Clostridium, other species</td></tr> <tr><td>5</td><td>Peptostreptococcus species</td></tr> <tr><td>6</td><td>Other anaerobic bacteria</td></tr> </table>                                                                                                                                                                                                                                                                                                                                                                                                                                                                                                                                                       | 1 | Actinomyces species          | 2 | Bacteriodes species          | 3 | Clostridium difficile        | 4 | Clostridium, other species | 5 | Peptostreptococcus species         | 6 | Other anaerobic bacteria |   |                        |   |                         |   |                        |    |                               |    |                      |    |                     |    |                    |    |                  |    |                                       |    |                  |    |                             |
| 1    | Actinomyces species                                                                                                                                                                                                                                           |                        |                                                                                                                                                                                                                                                                                                                                                                                                                                                                                                                                                                                                                                                                                                                                                                                                                                                                                                                        |   |                              |   |                              |   |                              |   |                            |   |                                    |   |                          |   |                        |   |                         |   |                        |    |                               |    |                      |    |                     |    |                    |    |                  |    |                                       |    |                  |    |                             |
| 2    | Bacteriodes species                                                                                                                                                                                                                                           |                        |                                                                                                                                                                                                                                                                                                                                                                                                                                                                                                                                                                                                                                                                                                                                                                                                                                                                                                                        |   |                              |   |                              |   |                              |   |                            |   |                                    |   |                          |   |                        |   |                         |   |                        |    |                               |    |                      |    |                     |    |                    |    |                  |    |                                       |    |                  |    |                             |
| 3    | Clostridium difficile                                                                                                                                                                                                                                         |                        |                                                                                                                                                                                                                                                                                                                                                                                                                                                                                                                                                                                                                                                                                                                                                                                                                                                                                                                        |   |                              |   |                              |   |                              |   |                            |   |                                    |   |                          |   |                        |   |                         |   |                        |    |                               |    |                      |    |                     |    |                    |    |                  |    |                                       |    |                  |    |                             |
| 4    | Clostridium, other species                                                                                                                                                                                                                                    |                        |                                                                                                                                                                                                                                                                                                                                                                                                                                                                                                                                                                                                                                                                                                                                                                                                                                                                                                                        |   |                              |   |                              |   |                              |   |                            |   |                                    |   |                          |   |                        |   |                         |   |                        |    |                               |    |                      |    |                     |    |                    |    |                  |    |                                       |    |                  |    |                             |
| 5    | Peptostreptococcus species                                                                                                                                                                                                                                    |                        |                                                                                                                                                                                                                                                                                                                                                                                                                                                                                                                                                                                                                                                                                                                                                                                                                                                                                                                        |   |                              |   |                              |   |                              |   |                            |   |                                    |   |                          |   |                        |   |                         |   |                        |    |                               |    |                      |    |                     |    |                    |    |                  |    |                                       |    |                  |    |                             |
| 6    | Other anaerobic bacteria                                                                                                                                                                                                                                      |                        |                                                                                                                                                                                                                                                                                                                                                                                                                                                                                                                                                                                                                                                                                                                                                                                                                                                                                                                        |   |                              |   |                              |   |                              |   |                            |   |                                    |   |                          |   |                        |   |                         |   |                        |    |                               |    |                      |    |                     |    |                    |    |                  |    |                                       |    |                  |    |                             |
| 1344 | <p>mycobacteria_v2</p> <p>Show the field ONLY if:<br/>[microorganism_v2] = '4'</p>                                                                                                                                                                            | Mycobacteria           | <p>dropdown</p> <table border="1"> <tr><td>1</td><td>Mycobacterium tuberculosis</td></tr> <tr><td>2</td><td>Mycobacteria, other</td></tr> </table>                                                                                                                                                                                                                                                                                                                                                                                                                                                                                                                                                                                                                                                                                                                                                                     | 1 | Mycobacterium tuberculosis   | 2 | Mycobacteria, other          |   |                              |   |                            |   |                                    |   |                          |   |                        |   |                         |   |                        |    |                               |    |                      |    |                     |    |                    |    |                  |    |                                       |    |                  |    |                             |
| 1    | Mycobacterium tuberculosis                                                                                                                                                                                                                                    |                        |                                                                                                                                                                                                                                                                                                                                                                                                                                                                                                                                                                                                                                                                                                                                                                                                                                                                                                                        |   |                              |   |                              |   |                              |   |                            |   |                                    |   |                          |   |                        |   |                         |   |                        |    |                               |    |                      |    |                     |    |                    |    |                  |    |                                       |    |                  |    |                             |
| 2    | Mycobacteria, other                                                                                                                                                                                                                                           |                        |                                                                                                                                                                                                                                                                                                                                                                                                                                                                                                                                                                                                                                                                                                                                                                                                                                                                                                                        |   |                              |   |                              |   |                              |   |                            |   |                                    |   |                          |   |                        |   |                         |   |                        |    |                               |    |                      |    |                     |    |                    |    |                  |    |                                       |    |                  |    |                             |

|             |                                                                                                                                                                                                                                                                                                                                                                                                 |                                  |                                                                                                                                                                                                                                                                                                                                                                                                                                                                                                                                                                                                                                                                                                                                                     |   |                           |               |                        |                           |                    |   |                           |           |                    |                           |               |   |                           |       |                      |                           |                        |    |                             |             |     |                           |                                |    |                           |    |             |
|-------------|-------------------------------------------------------------------------------------------------------------------------------------------------------------------------------------------------------------------------------------------------------------------------------------------------------------------------------------------------------------------------------------------------|----------------------------------|-----------------------------------------------------------------------------------------------------------------------------------------------------------------------------------------------------------------------------------------------------------------------------------------------------------------------------------------------------------------------------------------------------------------------------------------------------------------------------------------------------------------------------------------------------------------------------------------------------------------------------------------------------------------------------------------------------------------------------------------------------|---|---------------------------|---------------|------------------------|---------------------------|--------------------|---|---------------------------|-----------|--------------------|---------------------------|---------------|---|---------------------------|-------|----------------------|---------------------------|------------------------|----|-----------------------------|-------------|-----|---------------------------|--------------------------------|----|---------------------------|----|-------------|
| <p>1345</p> | <p>fungal_v2</p> <p>Show the field ONLY if:<br/>[microorganism_v2] = '5'</p>                                                                                                                                                                                                                                                                                                                    | <p>Fungal</p>                    | <p>dropdown</p> <table border="1"> <tr><td>1</td><td>Candida species</td></tr> <tr><td>2</td><td>Aspergillus species</td></tr> <tr><td>3</td><td>Blastomyces</td></tr> <tr><td>4</td><td>Mucor species</td></tr> <tr><td>5</td><td>Torulopsis species</td></tr> <tr><td>6</td><td>Coccidiomyces</td></tr> <tr><td>7</td><td>Histoplasma</td></tr> <tr><td>8</td><td>Other fungal species</td></tr> </table>                                                                                                                                                                                                                                                                                                                                         | 1 | Candida species           | 2             | Aspergillus species    | 3                         | Blastomyces        | 4 | Mucor species             | 5         | Torulopsis species | 6                         | Coccidiomyces | 7 | Histoplasma               | 8     | Other fungal species |                           |                        |    |                             |             |     |                           |                                |    |                           |    |             |
| 1           | Candida species                                                                                                                                                                                                                                                                                                                                                                                 |                                  |                                                                                                                                                                                                                                                                                                                                                                                                                                                                                                                                                                                                                                                                                                                                                     |   |                           |               |                        |                           |                    |   |                           |           |                    |                           |               |   |                           |       |                      |                           |                        |    |                             |             |     |                           |                                |    |                           |    |             |
| 2           | Aspergillus species                                                                                                                                                                                                                                                                                                                                                                             |                                  |                                                                                                                                                                                                                                                                                                                                                                                                                                                                                                                                                                                                                                                                                                                                                     |   |                           |               |                        |                           |                    |   |                           |           |                    |                           |               |   |                           |       |                      |                           |                        |    |                             |             |     |                           |                                |    |                           |    |             |
| 3           | Blastomyces                                                                                                                                                                                                                                                                                                                                                                                     |                                  |                                                                                                                                                                                                                                                                                                                                                                                                                                                                                                                                                                                                                                                                                                                                                     |   |                           |               |                        |                           |                    |   |                           |           |                    |                           |               |   |                           |       |                      |                           |                        |    |                             |             |     |                           |                                |    |                           |    |             |
| 4           | Mucor species                                                                                                                                                                                                                                                                                                                                                                                   |                                  |                                                                                                                                                                                                                                                                                                                                                                                                                                                                                                                                                                                                                                                                                                                                                     |   |                           |               |                        |                           |                    |   |                           |           |                    |                           |               |   |                           |       |                      |                           |                        |    |                             |             |     |                           |                                |    |                           |    |             |
| 5           | Torulopsis species                                                                                                                                                                                                                                                                                                                                                                              |                                  |                                                                                                                                                                                                                                                                                                                                                                                                                                                                                                                                                                                                                                                                                                                                                     |   |                           |               |                        |                           |                    |   |                           |           |                    |                           |               |   |                           |       |                      |                           |                        |    |                             |             |     |                           |                                |    |                           |    |             |
| 6           | Coccidiomyces                                                                                                                                                                                                                                                                                                                                                                                   |                                  |                                                                                                                                                                                                                                                                                                                                                                                                                                                                                                                                                                                                                                                                                                                                                     |   |                           |               |                        |                           |                    |   |                           |           |                    |                           |               |   |                           |       |                      |                           |                        |    |                             |             |     |                           |                                |    |                           |    |             |
| 7           | Histoplasma                                                                                                                                                                                                                                                                                                                                                                                     |                                  |                                                                                                                                                                                                                                                                                                                                                                                                                                                                                                                                                                                                                                                                                                                                                     |   |                           |               |                        |                           |                    |   |                           |           |                    |                           |               |   |                           |       |                      |                           |                        |    |                             |             |     |                           |                                |    |                           |    |             |
| 8           | Other fungal species                                                                                                                                                                                                                                                                                                                                                                            |                                  |                                                                                                                                                                                                                                                                                                                                                                                                                                                                                                                                                                                                                                                                                                                                                     |   |                           |               |                        |                           |                    |   |                           |           |                    |                           |               |   |                           |       |                      |                           |                        |    |                             |             |     |                           |                                |    |                           |    |             |
| <p>1346</p> | <p>virus_v2</p> <p>Show the field ONLY if:<br/>[microorganism_v2] = '6'</p>                                                                                                                                                                                                                                                                                                                     | <p>Virus</p>                     | <p>dropdown</p> <table border="1"> <tr><td>1</td><td>Adenovirus</td></tr> <tr><td>2</td><td>Cytomegalovirus</td></tr> <tr><td>3</td><td>Influenza A virus</td></tr> <tr><td>4</td><td>Influenza B virus</td></tr> <tr><td>5</td><td>HHV-1</td></tr> <tr><td>6</td><td>HHV-2</td></tr> <tr><td>7</td><td>Coronavirus</td></tr> <tr><td>8</td><td>Metapneumovirus</td></tr> <tr><td>9</td><td>Rhinovirus/Enterovirus</td></tr> <tr><td>10</td><td>Respiratory Syncytial virus</td></tr> <tr><td>11</td><td>EBV</td></tr> <tr><td>12</td><td>HHV-6</td></tr> <tr><td>13</td><td>VZV</td></tr> <tr><td>14</td><td>Other virus</td></tr> </table>                                                                                                        | 1 | Adenovirus                | 2             | Cytomegalovirus        | 3                         | Influenza A virus  | 4 | Influenza B virus         | 5         | HHV-1              | 6                         | HHV-2         | 7 | Coronavirus               | 8     | Metapneumovirus      | 9                         | Rhinovirus/Enterovirus | 10 | Respiratory Syncytial virus | 11          | EBV | 12                        | HHV-6                          | 13 | VZV                       | 14 | Other virus |
| 1           | Adenovirus                                                                                                                                                                                                                                                                                                                                                                                      |                                  |                                                                                                                                                                                                                                                                                                                                                                                                                                                                                                                                                                                                                                                                                                                                                     |   |                           |               |                        |                           |                    |   |                           |           |                    |                           |               |   |                           |       |                      |                           |                        |    |                             |             |     |                           |                                |    |                           |    |             |
| 2           | Cytomegalovirus                                                                                                                                                                                                                                                                                                                                                                                 |                                  |                                                                                                                                                                                                                                                                                                                                                                                                                                                                                                                                                                                                                                                                                                                                                     |   |                           |               |                        |                           |                    |   |                           |           |                    |                           |               |   |                           |       |                      |                           |                        |    |                             |             |     |                           |                                |    |                           |    |             |
| 3           | Influenza A virus                                                                                                                                                                                                                                                                                                                                                                               |                                  |                                                                                                                                                                                                                                                                                                                                                                                                                                                                                                                                                                                                                                                                                                                                                     |   |                           |               |                        |                           |                    |   |                           |           |                    |                           |               |   |                           |       |                      |                           |                        |    |                             |             |     |                           |                                |    |                           |    |             |
| 4           | Influenza B virus                                                                                                                                                                                                                                                                                                                                                                               |                                  |                                                                                                                                                                                                                                                                                                                                                                                                                                                                                                                                                                                                                                                                                                                                                     |   |                           |               |                        |                           |                    |   |                           |           |                    |                           |               |   |                           |       |                      |                           |                        |    |                             |             |     |                           |                                |    |                           |    |             |
| 5           | HHV-1                                                                                                                                                                                                                                                                                                                                                                                           |                                  |                                                                                                                                                                                                                                                                                                                                                                                                                                                                                                                                                                                                                                                                                                                                                     |   |                           |               |                        |                           |                    |   |                           |           |                    |                           |               |   |                           |       |                      |                           |                        |    |                             |             |     |                           |                                |    |                           |    |             |
| 6           | HHV-2                                                                                                                                                                                                                                                                                                                                                                                           |                                  |                                                                                                                                                                                                                                                                                                                                                                                                                                                                                                                                                                                                                                                                                                                                                     |   |                           |               |                        |                           |                    |   |                           |           |                    |                           |               |   |                           |       |                      |                           |                        |    |                             |             |     |                           |                                |    |                           |    |             |
| 7           | Coronavirus                                                                                                                                                                                                                                                                                                                                                                                     |                                  |                                                                                                                                                                                                                                                                                                                                                                                                                                                                                                                                                                                                                                                                                                                                                     |   |                           |               |                        |                           |                    |   |                           |           |                    |                           |               |   |                           |       |                      |                           |                        |    |                             |             |     |                           |                                |    |                           |    |             |
| 8           | Metapneumovirus                                                                                                                                                                                                                                                                                                                                                                                 |                                  |                                                                                                                                                                                                                                                                                                                                                                                                                                                                                                                                                                                                                                                                                                                                                     |   |                           |               |                        |                           |                    |   |                           |           |                    |                           |               |   |                           |       |                      |                           |                        |    |                             |             |     |                           |                                |    |                           |    |             |
| 9           | Rhinovirus/Enterovirus                                                                                                                                                                                                                                                                                                                                                                          |                                  |                                                                                                                                                                                                                                                                                                                                                                                                                                                                                                                                                                                                                                                                                                                                                     |   |                           |               |                        |                           |                    |   |                           |           |                    |                           |               |   |                           |       |                      |                           |                        |    |                             |             |     |                           |                                |    |                           |    |             |
| 10          | Respiratory Syncytial virus                                                                                                                                                                                                                                                                                                                                                                     |                                  |                                                                                                                                                                                                                                                                                                                                                                                                                                                                                                                                                                                                                                                                                                                                                     |   |                           |               |                        |                           |                    |   |                           |           |                    |                           |               |   |                           |       |                      |                           |                        |    |                             |             |     |                           |                                |    |                           |    |             |
| 11          | EBV                                                                                                                                                                                                                                                                                                                                                                                             |                                  |                                                                                                                                                                                                                                                                                                                                                                                                                                                                                                                                                                                                                                                                                                                                                     |   |                           |               |                        |                           |                    |   |                           |           |                    |                           |               |   |                           |       |                      |                           |                        |    |                             |             |     |                           |                                |    |                           |    |             |
| 12          | HHV-6                                                                                                                                                                                                                                                                                                                                                                                           |                                  |                                                                                                                                                                                                                                                                                                                                                                                                                                                                                                                                                                                                                                                                                                                                                     |   |                           |               |                        |                           |                    |   |                           |           |                    |                           |               |   |                           |       |                      |                           |                        |    |                             |             |     |                           |                                |    |                           |    |             |
| 13          | VZV                                                                                                                                                                                                                                                                                                                                                                                             |                                  |                                                                                                                                                                                                                                                                                                                                                                                                                                                                                                                                                                                                                                                                                                                                                     |   |                           |               |                        |                           |                    |   |                           |           |                    |                           |               |   |                           |       |                      |                           |                        |    |                             |             |     |                           |                                |    |                           |    |             |
| 14          | Other virus                                                                                                                                                                                                                                                                                                                                                                                     |                                  |                                                                                                                                                                                                                                                                                                                                                                                                                                                                                                                                                                                                                                                                                                                                                     |   |                           |               |                        |                           |                    |   |                           |           |                    |                           |               |   |                           |       |                      |                           |                        |    |                             |             |     |                           |                                |    |                           |    |             |
| <p>1347</p> | <p>secondary_infection_v2</p>                                                                                                                                                                                                                                                                                                                                                                   | <p>Secondary site infection?</p> | <p>checkbox</p> <table border="1"> <tr><td>1</td><td>secondary_infection_v2__1</td><td>Genitourinary</td></tr> <tr><td>2</td><td>secondary_infection_v2__2</td><td>Abdominal/GI</td></tr> <tr><td>3</td><td>secondary_infection_v2__3</td><td>Pulmonary</td></tr> <tr><td>4</td><td>secondary_infection_v2__4</td><td>Head/neck</td></tr> <tr><td>5</td><td>secondary_infection_v2__5</td><td>Blood</td></tr> <tr><td>6</td><td>secondary_infection_v2__6</td><td>Skin/soft-tissue/bone</td></tr> <tr><td>7</td><td>secondary_infection_v2__7</td><td>Gynecologic</td></tr> <tr><td>8</td><td>secondary_infection_v2__8</td><td>Source of infection<br/>Unclear</td></tr> <tr><td>9</td><td>secondary_infection_v2__9</td><td>No</td></tr> </table> | 1 | secondary_infection_v2__1 | Genitourinary | 2                      | secondary_infection_v2__2 | Abdominal/GI       | 3 | secondary_infection_v2__3 | Pulmonary | 4                  | secondary_infection_v2__4 | Head/neck     | 5 | secondary_infection_v2__5 | Blood | 6                    | secondary_infection_v2__6 | Skin/soft-tissue/bone  | 7  | secondary_infection_v2__7   | Gynecologic | 8   | secondary_infection_v2__8 | Source of infection<br>Unclear | 9  | secondary_infection_v2__9 | No |             |
| 1           | secondary_infection_v2__1                                                                                                                                                                                                                                                                                                                                                                       | Genitourinary                    |                                                                                                                                                                                                                                                                                                                                                                                                                                                                                                                                                                                                                                                                                                                                                     |   |                           |               |                        |                           |                    |   |                           |           |                    |                           |               |   |                           |       |                      |                           |                        |    |                             |             |     |                           |                                |    |                           |    |             |
| 2           | secondary_infection_v2__2                                                                                                                                                                                                                                                                                                                                                                       | Abdominal/GI                     |                                                                                                                                                                                                                                                                                                                                                                                                                                                                                                                                                                                                                                                                                                                                                     |   |                           |               |                        |                           |                    |   |                           |           |                    |                           |               |   |                           |       |                      |                           |                        |    |                             |             |     |                           |                                |    |                           |    |             |
| 3           | secondary_infection_v2__3                                                                                                                                                                                                                                                                                                                                                                       | Pulmonary                        |                                                                                                                                                                                                                                                                                                                                                                                                                                                                                                                                                                                                                                                                                                                                                     |   |                           |               |                        |                           |                    |   |                           |           |                    |                           |               |   |                           |       |                      |                           |                        |    |                             |             |     |                           |                                |    |                           |    |             |
| 4           | secondary_infection_v2__4                                                                                                                                                                                                                                                                                                                                                                       | Head/neck                        |                                                                                                                                                                                                                                                                                                                                                                                                                                                                                                                                                                                                                                                                                                                                                     |   |                           |               |                        |                           |                    |   |                           |           |                    |                           |               |   |                           |       |                      |                           |                        |    |                             |             |     |                           |                                |    |                           |    |             |
| 5           | secondary_infection_v2__5                                                                                                                                                                                                                                                                                                                                                                       | Blood                            |                                                                                                                                                                                                                                                                                                                                                                                                                                                                                                                                                                                                                                                                                                                                                     |   |                           |               |                        |                           |                    |   |                           |           |                    |                           |               |   |                           |       |                      |                           |                        |    |                             |             |     |                           |                                |    |                           |    |             |
| 6           | secondary_infection_v2__6                                                                                                                                                                                                                                                                                                                                                                       | Skin/soft-tissue/bone            |                                                                                                                                                                                                                                                                                                                                                                                                                                                                                                                                                                                                                                                                                                                                                     |   |                           |               |                        |                           |                    |   |                           |           |                    |                           |               |   |                           |       |                      |                           |                        |    |                             |             |     |                           |                                |    |                           |    |             |
| 7           | secondary_infection_v2__7                                                                                                                                                                                                                                                                                                                                                                       | Gynecologic                      |                                                                                                                                                                                                                                                                                                                                                                                                                                                                                                                                                                                                                                                                                                                                                     |   |                           |               |                        |                           |                    |   |                           |           |                    |                           |               |   |                           |       |                      |                           |                        |    |                             |             |     |                           |                                |    |                           |    |             |
| 8           | secondary_infection_v2__8                                                                                                                                                                                                                                                                                                                                                                       | Source of infection<br>Unclear   |                                                                                                                                                                                                                                                                                                                                                                                                                                                                                                                                                                                                                                                                                                                                                     |   |                           |               |                        |                           |                    |   |                           |           |                    |                           |               |   |                           |       |                      |                           |                        |    |                             |             |     |                           |                                |    |                           |    |             |
| 9           | secondary_infection_v2__9                                                                                                                                                                                                                                                                                                                                                                       | No                               |                                                                                                                                                                                                                                                                                                                                                                                                                                                                                                                                                                                                                                                                                                                                                     |   |                           |               |                        |                           |                    |   |                           |           |                    |                           |               |   |                           |       |                      |                           |                        |    |                             |             |     |                           |                                |    |                           |    |             |
| <p>1348</p> | <p>culture_2_v2</p> <p>Show the field ONLY if:<br/>[secondary_infection_v2(1)] = '1' or<br/>[secondary_infection_v2(2)] = '1'<br/>or [secondary_infection_v2(3)] =<br/>'1' or [secondary_infection_v2(4)]<br/>= '1' or [secondary_infection_v2<br/>(5)] = '1' or [secondary_infection_v<br/>2(6)] = '1' or [secondary_infection<br/>_v2(7)] = '1' or [secondary_infectio<br/>n_v2(8)] = '1'</p> | <p>Positive culture?</p>         | <p>dropdown</p> <table border="1"> <tr><td>1</td><td>Yes</td></tr> <tr><td>0</td><td>No</td></tr> </table>                                                                                                                                                                                                                                                                                                                                                                                                                                                                                                                                                                                                                                          | 1 | Yes                       | 0             | No                     |                           |                    |   |                           |           |                    |                           |               |   |                           |       |                      |                           |                        |    |                             |             |     |                           |                                |    |                           |    |             |
| 1           | Yes                                                                                                                                                                                                                                                                                                                                                                                             |                                  |                                                                                                                                                                                                                                                                                                                                                                                                                                                                                                                                                                                                                                                                                                                                                     |   |                           |               |                        |                           |                    |   |                           |           |                    |                           |               |   |                           |       |                      |                           |                        |    |                             |             |     |                           |                                |    |                           |    |             |
| 0           | No                                                                                                                                                                                                                                                                                                                                                                                              |                                  |                                                                                                                                                                                                                                                                                                                                                                                                                                                                                                                                                                                                                                                                                                                                                     |   |                           |               |                        |                           |                    |   |                           |           |                    |                           |               |   |                           |       |                      |                           |                        |    |                             |             |     |                           |                                |    |                           |    |             |
| <p>1349</p> | <p>microorganism2_ac8_v2</p> <p>Show the field ONLY if:<br/>[culture_2_v2] = '1'</p>                                                                                                                                                                                                                                                                                                            | <p>Microorganism isolated</p>    | <p>dropdown</p> <table border="1"> <tr><td>1</td><td>Gram positive bacteria</td></tr> <tr><td>2</td><td>Gram negative bacteria</td></tr> <tr><td>3</td><td>Anaerobic bacteria</td></tr> <tr><td>4</td><td>Mycobacteria</td></tr> <tr><td>5</td><td>Fungal</td></tr> <tr><td>6</td><td>Virus</td></tr> </table>                                                                                                                                                                                                                                                                                                                                                                                                                                      | 1 | Gram positive bacteria    | 2             | Gram negative bacteria | 3                         | Anaerobic bacteria | 4 | Mycobacteria              | 5         | Fungal             | 6                         | Virus         |   |                           |       |                      |                           |                        |    |                             |             |     |                           |                                |    |                           |    |             |
| 1           | Gram positive bacteria                                                                                                                                                                                                                                                                                                                                                                          |                                  |                                                                                                                                                                                                                                                                                                                                                                                                                                                                                                                                                                                                                                                                                                                                                     |   |                           |               |                        |                           |                    |   |                           |           |                    |                           |               |   |                           |       |                      |                           |                        |    |                             |             |     |                           |                                |    |                           |    |             |
| 2           | Gram negative bacteria                                                                                                                                                                                                                                                                                                                                                                          |                                  |                                                                                                                                                                                                                                                                                                                                                                                                                                                                                                                                                                                                                                                                                                                                                     |   |                           |               |                        |                           |                    |   |                           |           |                    |                           |               |   |                           |       |                      |                           |                        |    |                             |             |     |                           |                                |    |                           |    |             |
| 3           | Anaerobic bacteria                                                                                                                                                                                                                                                                                                                                                                              |                                  |                                                                                                                                                                                                                                                                                                                                                                                                                                                                                                                                                                                                                                                                                                                                                     |   |                           |               |                        |                           |                    |   |                           |           |                    |                           |               |   |                           |       |                      |                           |                        |    |                             |             |     |                           |                                |    |                           |    |             |
| 4           | Mycobacteria                                                                                                                                                                                                                                                                                                                                                                                    |                                  |                                                                                                                                                                                                                                                                                                                                                                                                                                                                                                                                                                                                                                                                                                                                                     |   |                           |               |                        |                           |                    |   |                           |           |                    |                           |               |   |                           |       |                      |                           |                        |    |                             |             |     |                           |                                |    |                           |    |             |
| 5           | Fungal                                                                                                                                                                                                                                                                                                                                                                                          |                                  |                                                                                                                                                                                                                                                                                                                                                                                                                                                                                                                                                                                                                                                                                                                                                     |   |                           |               |                        |                           |                    |   |                           |           |                    |                           |               |   |                           |       |                      |                           |                        |    |                             |             |     |                           |                                |    |                           |    |             |
| 6           | Virus                                                                                                                                                                                                                                                                                                                                                                                           |                                  |                                                                                                                                                                                                                                                                                                                                                                                                                                                                                                                                                                                                                                                                                                                                                     |   |                           |               |                        |                           |                    |   |                           |           |                    |                           |               |   |                           |       |                      |                           |                        |    |                             |             |     |                           |                                |    |                           |    |             |



|             |                                                                                                       |                               |                                                                                                                                                                                                                                                                                                                                                                                                                                                                                                                                                                                                                                                                                                                                                                                                                                                                                                                        |   |                              |   |                              |   |                              |   |                            |   |                                    |   |                          |   |                        |   |                         |   |                        |    |                               |    |                      |    |                     |    |                    |    |                  |    |                                       |    |                  |    |                             |
|-------------|-------------------------------------------------------------------------------------------------------|-------------------------------|------------------------------------------------------------------------------------------------------------------------------------------------------------------------------------------------------------------------------------------------------------------------------------------------------------------------------------------------------------------------------------------------------------------------------------------------------------------------------------------------------------------------------------------------------------------------------------------------------------------------------------------------------------------------------------------------------------------------------------------------------------------------------------------------------------------------------------------------------------------------------------------------------------------------|---|------------------------------|---|------------------------------|---|------------------------------|---|----------------------------|---|------------------------------------|---|--------------------------|---|------------------------|---|-------------------------|---|------------------------|----|-------------------------------|----|----------------------|----|---------------------|----|--------------------|----|------------------|----|---------------------------------------|----|------------------|----|-----------------------------|
| <p>1350</p> | <p>gram_positive_bacteri2_6b6_v2</p> <p>Show the field ONLY if:<br/>[microorganism2_ac8_v2] = '1'</p> | <p>Gram positive bacteria</p> | <p>dropdown</p> <table border="1"> <tr><td>1</td><td>Staphylococcus aureus (MSSA)</td></tr> <tr><td>2</td><td>Staphylococcus aureus (MRSA)</td></tr> <tr><td>3</td><td>Staphylococcus aureus (VRSA)</td></tr> <tr><td>4</td><td>Staphylococcus epidermidis</td></tr> <tr><td>5</td><td>Other Staphylococcus coagulase neg</td></tr> <tr><td>6</td><td>Streptococcus pneumoniae</td></tr> <tr><td>7</td><td>Streptococcus pyogenes</td></tr> <tr><td>8</td><td>Streptococcus agalactie</td></tr> <tr><td>9</td><td>Streptococcus viridans</td></tr> <tr><td>10</td><td>Streptococcus, other specises</td></tr> <tr><td>11</td><td>Enterococcus species</td></tr> <tr><td>12</td><td>Other Gram positive</td></tr> </table>                                                                                                                                                                                              | 1 | Staphylococcus aureus (MSSA) | 2 | Staphylococcus aureus (MRSA) | 3 | Staphylococcus aureus (VRSA) | 4 | Staphylococcus epidermidis | 5 | Other Staphylococcus coagulase neg | 6 | Streptococcus pneumoniae | 7 | Streptococcus pyogenes | 8 | Streptococcus agalactie | 9 | Streptococcus viridans | 10 | Streptococcus, other specises | 11 | Enterococcus species | 12 | Other Gram positive |    |                    |    |                  |    |                                       |    |                  |    |                             |
| 1           | Staphylococcus aureus (MSSA)                                                                          |                               |                                                                                                                                                                                                                                                                                                                                                                                                                                                                                                                                                                                                                                                                                                                                                                                                                                                                                                                        |   |                              |   |                              |   |                              |   |                            |   |                                    |   |                          |   |                        |   |                         |   |                        |    |                               |    |                      |    |                     |    |                    |    |                  |    |                                       |    |                  |    |                             |
| 2           | Staphylococcus aureus (MRSA)                                                                          |                               |                                                                                                                                                                                                                                                                                                                                                                                                                                                                                                                                                                                                                                                                                                                                                                                                                                                                                                                        |   |                              |   |                              |   |                              |   |                            |   |                                    |   |                          |   |                        |   |                         |   |                        |    |                               |    |                      |    |                     |    |                    |    |                  |    |                                       |    |                  |    |                             |
| 3           | Staphylococcus aureus (VRSA)                                                                          |                               |                                                                                                                                                                                                                                                                                                                                                                                                                                                                                                                                                                                                                                                                                                                                                                                                                                                                                                                        |   |                              |   |                              |   |                              |   |                            |   |                                    |   |                          |   |                        |   |                         |   |                        |    |                               |    |                      |    |                     |    |                    |    |                  |    |                                       |    |                  |    |                             |
| 4           | Staphylococcus epidermidis                                                                            |                               |                                                                                                                                                                                                                                                                                                                                                                                                                                                                                                                                                                                                                                                                                                                                                                                                                                                                                                                        |   |                              |   |                              |   |                              |   |                            |   |                                    |   |                          |   |                        |   |                         |   |                        |    |                               |    |                      |    |                     |    |                    |    |                  |    |                                       |    |                  |    |                             |
| 5           | Other Staphylococcus coagulase neg                                                                    |                               |                                                                                                                                                                                                                                                                                                                                                                                                                                                                                                                                                                                                                                                                                                                                                                                                                                                                                                                        |   |                              |   |                              |   |                              |   |                            |   |                                    |   |                          |   |                        |   |                         |   |                        |    |                               |    |                      |    |                     |    |                    |    |                  |    |                                       |    |                  |    |                             |
| 6           | Streptococcus pneumoniae                                                                              |                               |                                                                                                                                                                                                                                                                                                                                                                                                                                                                                                                                                                                                                                                                                                                                                                                                                                                                                                                        |   |                              |   |                              |   |                              |   |                            |   |                                    |   |                          |   |                        |   |                         |   |                        |    |                               |    |                      |    |                     |    |                    |    |                  |    |                                       |    |                  |    |                             |
| 7           | Streptococcus pyogenes                                                                                |                               |                                                                                                                                                                                                                                                                                                                                                                                                                                                                                                                                                                                                                                                                                                                                                                                                                                                                                                                        |   |                              |   |                              |   |                              |   |                            |   |                                    |   |                          |   |                        |   |                         |   |                        |    |                               |    |                      |    |                     |    |                    |    |                  |    |                                       |    |                  |    |                             |
| 8           | Streptococcus agalactie                                                                               |                               |                                                                                                                                                                                                                                                                                                                                                                                                                                                                                                                                                                                                                                                                                                                                                                                                                                                                                                                        |   |                              |   |                              |   |                              |   |                            |   |                                    |   |                          |   |                        |   |                         |   |                        |    |                               |    |                      |    |                     |    |                    |    |                  |    |                                       |    |                  |    |                             |
| 9           | Streptococcus viridans                                                                                |                               |                                                                                                                                                                                                                                                                                                                                                                                                                                                                                                                                                                                                                                                                                                                                                                                                                                                                                                                        |   |                              |   |                              |   |                              |   |                            |   |                                    |   |                          |   |                        |   |                         |   |                        |    |                               |    |                      |    |                     |    |                    |    |                  |    |                                       |    |                  |    |                             |
| 10          | Streptococcus, other specises                                                                         |                               |                                                                                                                                                                                                                                                                                                                                                                                                                                                                                                                                                                                                                                                                                                                                                                                                                                                                                                                        |   |                              |   |                              |   |                              |   |                            |   |                                    |   |                          |   |                        |   |                         |   |                        |    |                               |    |                      |    |                     |    |                    |    |                  |    |                                       |    |                  |    |                             |
| 11          | Enterococcus species                                                                                  |                               |                                                                                                                                                                                                                                                                                                                                                                                                                                                                                                                                                                                                                                                                                                                                                                                                                                                                                                                        |   |                              |   |                              |   |                              |   |                            |   |                                    |   |                          |   |                        |   |                         |   |                        |    |                               |    |                      |    |                     |    |                    |    |                  |    |                                       |    |                  |    |                             |
| 12          | Other Gram positive                                                                                   |                               |                                                                                                                                                                                                                                                                                                                                                                                                                                                                                                                                                                                                                                                                                                                                                                                                                                                                                                                        |   |                              |   |                              |   |                              |   |                            |   |                                    |   |                          |   |                        |   |                         |   |                        |    |                               |    |                      |    |                     |    |                    |    |                  |    |                                       |    |                  |    |                             |
| <p>1351</p> | <p>gram_neg_bact2_702_v2</p> <p>Show the field ONLY if:<br/>[microorganism2_ac8_v2] = '2'</p>         | <p>Gram negative bacteria</p> | <p>dropdown</p> <table border="1"> <tr><td>1</td><td>Escherichia coli</td></tr> <tr><td>2</td><td>Pseudomonas species</td></tr> <tr><td>3</td><td>Hemophilus influenzae</td></tr> <tr><td>4</td><td>Klebsiella species</td></tr> <tr><td>5</td><td>Acinetobacter species</td></tr> <tr><td>6</td><td>Enterobacter species</td></tr> <tr><td>7</td><td>Legionella species</td></tr> <tr><td>8</td><td>Moraxella catarrhalis</td></tr> <tr><td>9</td><td>Morganella species</td></tr> <tr><td>10</td><td>Neisseria meningitides</td></tr> <tr><td>11</td><td>Proteus species</td></tr> <tr><td>12</td><td>Citrobacter species</td></tr> <tr><td>13</td><td>Salmonella species</td></tr> <tr><td>14</td><td>Serratia species</td></tr> <tr><td>15</td><td>Sternotrophomonas/Xanthomonas species</td></tr> <tr><td>16</td><td>Yersinia species</td></tr> <tr><td>17</td><td>Other Gram negative species</td></tr> </table> | 1 | Escherichia coli             | 2 | Pseudomonas species          | 3 | Hemophilus influenzae        | 4 | Klebsiella species         | 5 | Acinetobacter species              | 6 | Enterobacter species     | 7 | Legionella species     | 8 | Moraxella catarrhalis   | 9 | Morganella species     | 10 | Neisseria meningitides        | 11 | Proteus species      | 12 | Citrobacter species | 13 | Salmonella species | 14 | Serratia species | 15 | Sternotrophomonas/Xanthomonas species | 16 | Yersinia species | 17 | Other Gram negative species |
| 1           | Escherichia coli                                                                                      |                               |                                                                                                                                                                                                                                                                                                                                                                                                                                                                                                                                                                                                                                                                                                                                                                                                                                                                                                                        |   |                              |   |                              |   |                              |   |                            |   |                                    |   |                          |   |                        |   |                         |   |                        |    |                               |    |                      |    |                     |    |                    |    |                  |    |                                       |    |                  |    |                             |
| 2           | Pseudomonas species                                                                                   |                               |                                                                                                                                                                                                                                                                                                                                                                                                                                                                                                                                                                                                                                                                                                                                                                                                                                                                                                                        |   |                              |   |                              |   |                              |   |                            |   |                                    |   |                          |   |                        |   |                         |   |                        |    |                               |    |                      |    |                     |    |                    |    |                  |    |                                       |    |                  |    |                             |
| 3           | Hemophilus influenzae                                                                                 |                               |                                                                                                                                                                                                                                                                                                                                                                                                                                                                                                                                                                                                                                                                                                                                                                                                                                                                                                                        |   |                              |   |                              |   |                              |   |                            |   |                                    |   |                          |   |                        |   |                         |   |                        |    |                               |    |                      |    |                     |    |                    |    |                  |    |                                       |    |                  |    |                             |
| 4           | Klebsiella species                                                                                    |                               |                                                                                                                                                                                                                                                                                                                                                                                                                                                                                                                                                                                                                                                                                                                                                                                                                                                                                                                        |   |                              |   |                              |   |                              |   |                            |   |                                    |   |                          |   |                        |   |                         |   |                        |    |                               |    |                      |    |                     |    |                    |    |                  |    |                                       |    |                  |    |                             |
| 5           | Acinetobacter species                                                                                 |                               |                                                                                                                                                                                                                                                                                                                                                                                                                                                                                                                                                                                                                                                                                                                                                                                                                                                                                                                        |   |                              |   |                              |   |                              |   |                            |   |                                    |   |                          |   |                        |   |                         |   |                        |    |                               |    |                      |    |                     |    |                    |    |                  |    |                                       |    |                  |    |                             |
| 6           | Enterobacter species                                                                                  |                               |                                                                                                                                                                                                                                                                                                                                                                                                                                                                                                                                                                                                                                                                                                                                                                                                                                                                                                                        |   |                              |   |                              |   |                              |   |                            |   |                                    |   |                          |   |                        |   |                         |   |                        |    |                               |    |                      |    |                     |    |                    |    |                  |    |                                       |    |                  |    |                             |
| 7           | Legionella species                                                                                    |                               |                                                                                                                                                                                                                                                                                                                                                                                                                                                                                                                                                                                                                                                                                                                                                                                                                                                                                                                        |   |                              |   |                              |   |                              |   |                            |   |                                    |   |                          |   |                        |   |                         |   |                        |    |                               |    |                      |    |                     |    |                    |    |                  |    |                                       |    |                  |    |                             |
| 8           | Moraxella catarrhalis                                                                                 |                               |                                                                                                                                                                                                                                                                                                                                                                                                                                                                                                                                                                                                                                                                                                                                                                                                                                                                                                                        |   |                              |   |                              |   |                              |   |                            |   |                                    |   |                          |   |                        |   |                         |   |                        |    |                               |    |                      |    |                     |    |                    |    |                  |    |                                       |    |                  |    |                             |
| 9           | Morganella species                                                                                    |                               |                                                                                                                                                                                                                                                                                                                                                                                                                                                                                                                                                                                                                                                                                                                                                                                                                                                                                                                        |   |                              |   |                              |   |                              |   |                            |   |                                    |   |                          |   |                        |   |                         |   |                        |    |                               |    |                      |    |                     |    |                    |    |                  |    |                                       |    |                  |    |                             |
| 10          | Neisseria meningitides                                                                                |                               |                                                                                                                                                                                                                                                                                                                                                                                                                                                                                                                                                                                                                                                                                                                                                                                                                                                                                                                        |   |                              |   |                              |   |                              |   |                            |   |                                    |   |                          |   |                        |   |                         |   |                        |    |                               |    |                      |    |                     |    |                    |    |                  |    |                                       |    |                  |    |                             |
| 11          | Proteus species                                                                                       |                               |                                                                                                                                                                                                                                                                                                                                                                                                                                                                                                                                                                                                                                                                                                                                                                                                                                                                                                                        |   |                              |   |                              |   |                              |   |                            |   |                                    |   |                          |   |                        |   |                         |   |                        |    |                               |    |                      |    |                     |    |                    |    |                  |    |                                       |    |                  |    |                             |
| 12          | Citrobacter species                                                                                   |                               |                                                                                                                                                                                                                                                                                                                                                                                                                                                                                                                                                                                                                                                                                                                                                                                                                                                                                                                        |   |                              |   |                              |   |                              |   |                            |   |                                    |   |                          |   |                        |   |                         |   |                        |    |                               |    |                      |    |                     |    |                    |    |                  |    |                                       |    |                  |    |                             |
| 13          | Salmonella species                                                                                    |                               |                                                                                                                                                                                                                                                                                                                                                                                                                                                                                                                                                                                                                                                                                                                                                                                                                                                                                                                        |   |                              |   |                              |   |                              |   |                            |   |                                    |   |                          |   |                        |   |                         |   |                        |    |                               |    |                      |    |                     |    |                    |    |                  |    |                                       |    |                  |    |                             |
| 14          | Serratia species                                                                                      |                               |                                                                                                                                                                                                                                                                                                                                                                                                                                                                                                                                                                                                                                                                                                                                                                                                                                                                                                                        |   |                              |   |                              |   |                              |   |                            |   |                                    |   |                          |   |                        |   |                         |   |                        |    |                               |    |                      |    |                     |    |                    |    |                  |    |                                       |    |                  |    |                             |
| 15          | Sternotrophomonas/Xanthomonas species                                                                 |                               |                                                                                                                                                                                                                                                                                                                                                                                                                                                                                                                                                                                                                                                                                                                                                                                                                                                                                                                        |   |                              |   |                              |   |                              |   |                            |   |                                    |   |                          |   |                        |   |                         |   |                        |    |                               |    |                      |    |                     |    |                    |    |                  |    |                                       |    |                  |    |                             |
| 16          | Yersinia species                                                                                      |                               |                                                                                                                                                                                                                                                                                                                                                                                                                                                                                                                                                                                                                                                                                                                                                                                                                                                                                                                        |   |                              |   |                              |   |                              |   |                            |   |                                    |   |                          |   |                        |   |                         |   |                        |    |                               |    |                      |    |                     |    |                    |    |                  |    |                                       |    |                  |    |                             |
| 17          | Other Gram negative species                                                                           |                               |                                                                                                                                                                                                                                                                                                                                                                                                                                                                                                                                                                                                                                                                                                                                                                                                                                                                                                                        |   |                              |   |                              |   |                              |   |                            |   |                                    |   |                          |   |                        |   |                         |   |                        |    |                               |    |                      |    |                     |    |                    |    |                  |    |                                       |    |                  |    |                             |
| <p>1352</p> | <p>mycobacteria2_a62_v2</p> <p>Show the field ONLY if:<br/>[microorganism2_ac8_v2] = '4'</p>          | <p>Mycobacteria</p>           | <p>dropdown</p> <table border="1"> <tr><td>1</td><td>Mycobacterium tuberculosis</td></tr> <tr><td>2</td><td>Mycobacteria, other</td></tr> </table>                                                                                                                                                                                                                                                                                                                                                                                                                                                                                                                                                                                                                                                                                                                                                                     | 1 | Mycobacterium tuberculosis   | 2 | Mycobacteria, other          |   |                              |   |                            |   |                                    |   |                          |   |                        |   |                         |   |                        |    |                               |    |                      |    |                     |    |                    |    |                  |    |                                       |    |                  |    |                             |
| 1           | Mycobacterium tuberculosis                                                                            |                               |                                                                                                                                                                                                                                                                                                                                                                                                                                                                                                                                                                                                                                                                                                                                                                                                                                                                                                                        |   |                              |   |                              |   |                              |   |                            |   |                                    |   |                          |   |                        |   |                         |   |                        |    |                               |    |                      |    |                     |    |                    |    |                  |    |                                       |    |                  |    |                             |
| 2           | Mycobacteria, other                                                                                   |                               |                                                                                                                                                                                                                                                                                                                                                                                                                                                                                                                                                                                                                                                                                                                                                                                                                                                                                                                        |   |                              |   |                              |   |                              |   |                            |   |                                    |   |                          |   |                        |   |                         |   |                        |    |                               |    |                      |    |                     |    |                    |    |                  |    |                                       |    |                  |    |                             |
| <p>1353</p> | <p>anaerobic2_e5d_v2</p> <p>Show the field ONLY if:<br/>[microorganism2_ac8_v2] = '3'</p>             | <p>Anaerobic bacteria</p>     | <p>dropdown</p> <table border="1"> <tr><td>1</td><td>Actinomyces species</td></tr> <tr><td>2</td><td>Bacteriodes species</td></tr> <tr><td>3</td><td>Clostriduum difficile</td></tr> <tr><td>4</td><td>Clostridium, other species</td></tr> <tr><td>5</td><td>Peptostreptococcus species</td></tr> <tr><td>6</td><td>Other anaerobic bacteria</td></tr> </table>                                                                                                                                                                                                                                                                                                                                                                                                                                                                                                                                                       | 1 | Actinomyces species          | 2 | Bacteriodes species          | 3 | Clostriduum difficile        | 4 | Clostridium, other species | 5 | Peptostreptococcus species         | 6 | Other anaerobic bacteria |   |                        |   |                         |   |                        |    |                               |    |                      |    |                     |    |                    |    |                  |    |                                       |    |                  |    |                             |
| 1           | Actinomyces species                                                                                   |                               |                                                                                                                                                                                                                                                                                                                                                                                                                                                                                                                                                                                                                                                                                                                                                                                                                                                                                                                        |   |                              |   |                              |   |                              |   |                            |   |                                    |   |                          |   |                        |   |                         |   |                        |    |                               |    |                      |    |                     |    |                    |    |                  |    |                                       |    |                  |    |                             |
| 2           | Bacteriodes species                                                                                   |                               |                                                                                                                                                                                                                                                                                                                                                                                                                                                                                                                                                                                                                                                                                                                                                                                                                                                                                                                        |   |                              |   |                              |   |                              |   |                            |   |                                    |   |                          |   |                        |   |                         |   |                        |    |                               |    |                      |    |                     |    |                    |    |                  |    |                                       |    |                  |    |                             |
| 3           | Clostriduum difficile                                                                                 |                               |                                                                                                                                                                                                                                                                                                                                                                                                                                                                                                                                                                                                                                                                                                                                                                                                                                                                                                                        |   |                              |   |                              |   |                              |   |                            |   |                                    |   |                          |   |                        |   |                         |   |                        |    |                               |    |                      |    |                     |    |                    |    |                  |    |                                       |    |                  |    |                             |
| 4           | Clostridium, other species                                                                            |                               |                                                                                                                                                                                                                                                                                                                                                                                                                                                                                                                                                                                                                                                                                                                                                                                                                                                                                                                        |   |                              |   |                              |   |                              |   |                            |   |                                    |   |                          |   |                        |   |                         |   |                        |    |                               |    |                      |    |                     |    |                    |    |                  |    |                                       |    |                  |    |                             |
| 5           | Peptostreptococcus species                                                                            |                               |                                                                                                                                                                                                                                                                                                                                                                                                                                                                                                                                                                                                                                                                                                                                                                                                                                                                                                                        |   |                              |   |                              |   |                              |   |                            |   |                                    |   |                          |   |                        |   |                         |   |                        |    |                               |    |                      |    |                     |    |                    |    |                  |    |                                       |    |                  |    |                             |
| 6           | Other anaerobic bacteria                                                                              |                               |                                                                                                                                                                                                                                                                                                                                                                                                                                                                                                                                                                                                                                                                                                                                                                                                                                                                                                                        |   |                              |   |                              |   |                              |   |                            |   |                                    |   |                          |   |                        |   |                         |   |                        |    |                               |    |                      |    |                     |    |                    |    |                  |    |                                       |    |                  |    |                             |
| <p>1354</p> | <p>funga2_20b_v2</p> <p>Show the field ONLY if:<br/>[microorganism2_ac8_v2] = '5'</p>                 | <p>Fungal</p>                 | <p>dropdown</p> <table border="1"> <tr><td>1</td><td>Candida species</td></tr> <tr><td>2</td><td>Aspergillus species</td></tr> <tr><td>3</td><td>Blastomyces</td></tr> <tr><td>4</td><td>Mucor species</td></tr> <tr><td>5</td><td>Torulopsis species</td></tr> <tr><td>6</td><td>Coccidiomyces</td></tr> <tr><td>7</td><td>Histoplasma</td></tr> <tr><td>8</td><td>Other fungal species</td></tr> </table>                                                                                                                                                                                                                                                                                                                                                                                                                                                                                                            | 1 | Candida species              | 2 | Aspergillus species          | 3 | Blastomyces                  | 4 | Mucor species              | 5 | Torulopsis species                 | 6 | Coccidiomyces            | 7 | Histoplasma            | 8 | Other fungal species    |   |                        |    |                               |    |                      |    |                     |    |                    |    |                  |    |                                       |    |                  |    |                             |
| 1           | Candida species                                                                                       |                               |                                                                                                                                                                                                                                                                                                                                                                                                                                                                                                                                                                                                                                                                                                                                                                                                                                                                                                                        |   |                              |   |                              |   |                              |   |                            |   |                                    |   |                          |   |                        |   |                         |   |                        |    |                               |    |                      |    |                     |    |                    |    |                  |    |                                       |    |                  |    |                             |
| 2           | Aspergillus species                                                                                   |                               |                                                                                                                                                                                                                                                                                                                                                                                                                                                                                                                                                                                                                                                                                                                                                                                                                                                                                                                        |   |                              |   |                              |   |                              |   |                            |   |                                    |   |                          |   |                        |   |                         |   |                        |    |                               |    |                      |    |                     |    |                    |    |                  |    |                                       |    |                  |    |                             |
| 3           | Blastomyces                                                                                           |                               |                                                                                                                                                                                                                                                                                                                                                                                                                                                                                                                                                                                                                                                                                                                                                                                                                                                                                                                        |   |                              |   |                              |   |                              |   |                            |   |                                    |   |                          |   |                        |   |                         |   |                        |    |                               |    |                      |    |                     |    |                    |    |                  |    |                                       |    |                  |    |                             |
| 4           | Mucor species                                                                                         |                               |                                                                                                                                                                                                                                                                                                                                                                                                                                                                                                                                                                                                                                                                                                                                                                                                                                                                                                                        |   |                              |   |                              |   |                              |   |                            |   |                                    |   |                          |   |                        |   |                         |   |                        |    |                               |    |                      |    |                     |    |                    |    |                  |    |                                       |    |                  |    |                             |
| 5           | Torulopsis species                                                                                    |                               |                                                                                                                                                                                                                                                                                                                                                                                                                                                                                                                                                                                                                                                                                                                                                                                                                                                                                                                        |   |                              |   |                              |   |                              |   |                            |   |                                    |   |                          |   |                        |   |                         |   |                        |    |                               |    |                      |    |                     |    |                    |    |                  |    |                                       |    |                  |    |                             |
| 6           | Coccidiomyces                                                                                         |                               |                                                                                                                                                                                                                                                                                                                                                                                                                                                                                                                                                                                                                                                                                                                                                                                                                                                                                                                        |   |                              |   |                              |   |                              |   |                            |   |                                    |   |                          |   |                        |   |                         |   |                        |    |                               |    |                      |    |                     |    |                    |    |                  |    |                                       |    |                  |    |                             |
| 7           | Histoplasma                                                                                           |                               |                                                                                                                                                                                                                                                                                                                                                                                                                                                                                                                                                                                                                                                                                                                                                                                                                                                                                                                        |   |                              |   |                              |   |                              |   |                            |   |                                    |   |                          |   |                        |   |                         |   |                        |    |                               |    |                      |    |                     |    |                    |    |                  |    |                                       |    |                  |    |                             |
| 8           | Other fungal species                                                                                  |                               |                                                                                                                                                                                                                                                                                                                                                                                                                                                                                                                                                                                                                                                                                                                                                                                                                                                                                                                        |   |                              |   |                              |   |                              |   |                            |   |                                    |   |                          |   |                        |   |                         |   |                        |    |                               |    |                      |    |                     |    |                    |    |                  |    |                                       |    |                  |    |                             |

|      |                                                                                 |                                                                                                                                                                             |                                                                                                                                                                                                                                                                                                                                                                                                                                                                                                                                                                                                                                                                                                                                                                                                                                                                                                                                                                                                                                                                                                                                                                                                       |   |                          |    |                 |                          |                            |   |                          |                                              |       |                          |                                                                                      |   |                          |                                                                                        |                 |                          |                                                                                         |    |                             |                                       |     |                          |                                   |    |                          |                             |             |                          |                                                     |
|------|---------------------------------------------------------------------------------|-----------------------------------------------------------------------------------------------------------------------------------------------------------------------------|-------------------------------------------------------------------------------------------------------------------------------------------------------------------------------------------------------------------------------------------------------------------------------------------------------------------------------------------------------------------------------------------------------------------------------------------------------------------------------------------------------------------------------------------------------------------------------------------------------------------------------------------------------------------------------------------------------------------------------------------------------------------------------------------------------------------------------------------------------------------------------------------------------------------------------------------------------------------------------------------------------------------------------------------------------------------------------------------------------------------------------------------------------------------------------------------------------|---|--------------------------|----|-----------------|--------------------------|----------------------------|---|--------------------------|----------------------------------------------|-------|--------------------------|--------------------------------------------------------------------------------------|---|--------------------------|----------------------------------------------------------------------------------------|-----------------|--------------------------|-----------------------------------------------------------------------------------------|----|-----------------------------|---------------------------------------|-----|--------------------------|-----------------------------------|----|--------------------------|-----------------------------|-------------|--------------------------|-----------------------------------------------------|
| 1355 | virus2_050_v2<br>Show the field ONLY if:<br>[microorganism2_ac8_v2] = '6'       | Virus                                                                                                                                                                       | dropdown<br><table border="1"> <tr><td>1</td><td>Adenovirus</td></tr> <tr><td>2</td><td>Cytomegalovirus</td></tr> <tr><td>3</td><td>Influenza A virus</td></tr> <tr><td>4</td><td>Influenza B virus</td></tr> <tr><td>5</td><td>HHV-1</td></tr> <tr><td>6</td><td>HHV-2</td></tr> <tr><td>7</td><td>Coronavirus</td></tr> <tr><td>8</td><td>Metapneumovirus</td></tr> <tr><td>9</td><td>Rhinovirus/Enterovirus</td></tr> <tr><td>10</td><td>Respiratory Syncytial virus</td></tr> <tr><td>11</td><td>EBV</td></tr> <tr><td>12</td><td>HHV-6</td></tr> <tr><td>13</td><td>VZV</td></tr> <tr><td>14</td><td>Other virus</td></tr> </table>                                                                                                                                                                                                                                                                                                                                                                                                                                                                                                                                                              | 1 | Adenovirus               | 2  | Cytomegalovirus | 3                        | Influenza A virus          | 4 | Influenza B virus        | 5                                            | HHV-1 | 6                        | HHV-2                                                                                | 7 | Coronavirus              | 8                                                                                      | Metapneumovirus | 9                        | Rhinovirus/Enterovirus                                                                  | 10 | Respiratory Syncytial virus | 11                                    | EBV | 12                       | HHV-6                             | 13 | VZV                      | 14                          | Other virus |                          |                                                     |
| 1    | Adenovirus                                                                      |                                                                                                                                                                             |                                                                                                                                                                                                                                                                                                                                                                                                                                                                                                                                                                                                                                                                                                                                                                                                                                                                                                                                                                                                                                                                                                                                                                                                       |   |                          |    |                 |                          |                            |   |                          |                                              |       |                          |                                                                                      |   |                          |                                                                                        |                 |                          |                                                                                         |    |                             |                                       |     |                          |                                   |    |                          |                             |             |                          |                                                     |
| 2    | Cytomegalovirus                                                                 |                                                                                                                                                                             |                                                                                                                                                                                                                                                                                                                                                                                                                                                                                                                                                                                                                                                                                                                                                                                                                                                                                                                                                                                                                                                                                                                                                                                                       |   |                          |    |                 |                          |                            |   |                          |                                              |       |                          |                                                                                      |   |                          |                                                                                        |                 |                          |                                                                                         |    |                             |                                       |     |                          |                                   |    |                          |                             |             |                          |                                                     |
| 3    | Influenza A virus                                                               |                                                                                                                                                                             |                                                                                                                                                                                                                                                                                                                                                                                                                                                                                                                                                                                                                                                                                                                                                                                                                                                                                                                                                                                                                                                                                                                                                                                                       |   |                          |    |                 |                          |                            |   |                          |                                              |       |                          |                                                                                      |   |                          |                                                                                        |                 |                          |                                                                                         |    |                             |                                       |     |                          |                                   |    |                          |                             |             |                          |                                                     |
| 4    | Influenza B virus                                                               |                                                                                                                                                                             |                                                                                                                                                                                                                                                                                                                                                                                                                                                                                                                                                                                                                                                                                                                                                                                                                                                                                                                                                                                                                                                                                                                                                                                                       |   |                          |    |                 |                          |                            |   |                          |                                              |       |                          |                                                                                      |   |                          |                                                                                        |                 |                          |                                                                                         |    |                             |                                       |     |                          |                                   |    |                          |                             |             |                          |                                                     |
| 5    | HHV-1                                                                           |                                                                                                                                                                             |                                                                                                                                                                                                                                                                                                                                                                                                                                                                                                                                                                                                                                                                                                                                                                                                                                                                                                                                                                                                                                                                                                                                                                                                       |   |                          |    |                 |                          |                            |   |                          |                                              |       |                          |                                                                                      |   |                          |                                                                                        |                 |                          |                                                                                         |    |                             |                                       |     |                          |                                   |    |                          |                             |             |                          |                                                     |
| 6    | HHV-2                                                                           |                                                                                                                                                                             |                                                                                                                                                                                                                                                                                                                                                                                                                                                                                                                                                                                                                                                                                                                                                                                                                                                                                                                                                                                                                                                                                                                                                                                                       |   |                          |    |                 |                          |                            |   |                          |                                              |       |                          |                                                                                      |   |                          |                                                                                        |                 |                          |                                                                                         |    |                             |                                       |     |                          |                                   |    |                          |                             |             |                          |                                                     |
| 7    | Coronavirus                                                                     |                                                                                                                                                                             |                                                                                                                                                                                                                                                                                                                                                                                                                                                                                                                                                                                                                                                                                                                                                                                                                                                                                                                                                                                                                                                                                                                                                                                                       |   |                          |    |                 |                          |                            |   |                          |                                              |       |                          |                                                                                      |   |                          |                                                                                        |                 |                          |                                                                                         |    |                             |                                       |     |                          |                                   |    |                          |                             |             |                          |                                                     |
| 8    | Metapneumovirus                                                                 |                                                                                                                                                                             |                                                                                                                                                                                                                                                                                                                                                                                                                                                                                                                                                                                                                                                                                                                                                                                                                                                                                                                                                                                                                                                                                                                                                                                                       |   |                          |    |                 |                          |                            |   |                          |                                              |       |                          |                                                                                      |   |                          |                                                                                        |                 |                          |                                                                                         |    |                             |                                       |     |                          |                                   |    |                          |                             |             |                          |                                                     |
| 9    | Rhinovirus/Enterovirus                                                          |                                                                                                                                                                             |                                                                                                                                                                                                                                                                                                                                                                                                                                                                                                                                                                                                                                                                                                                                                                                                                                                                                                                                                                                                                                                                                                                                                                                                       |   |                          |    |                 |                          |                            |   |                          |                                              |       |                          |                                                                                      |   |                          |                                                                                        |                 |                          |                                                                                         |    |                             |                                       |     |                          |                                   |    |                          |                             |             |                          |                                                     |
| 10   | Respiratory Syncytial virus                                                     |                                                                                                                                                                             |                                                                                                                                                                                                                                                                                                                                                                                                                                                                                                                                                                                                                                                                                                                                                                                                                                                                                                                                                                                                                                                                                                                                                                                                       |   |                          |    |                 |                          |                            |   |                          |                                              |       |                          |                                                                                      |   |                          |                                                                                        |                 |                          |                                                                                         |    |                             |                                       |     |                          |                                   |    |                          |                             |             |                          |                                                     |
| 11   | EBV                                                                             |                                                                                                                                                                             |                                                                                                                                                                                                                                                                                                                                                                                                                                                                                                                                                                                                                                                                                                                                                                                                                                                                                                                                                                                                                                                                                                                                                                                                       |   |                          |    |                 |                          |                            |   |                          |                                              |       |                          |                                                                                      |   |                          |                                                                                        |                 |                          |                                                                                         |    |                             |                                       |     |                          |                                   |    |                          |                             |             |                          |                                                     |
| 12   | HHV-6                                                                           |                                                                                                                                                                             |                                                                                                                                                                                                                                                                                                                                                                                                                                                                                                                                                                                                                                                                                                                                                                                                                                                                                                                                                                                                                                                                                                                                                                                                       |   |                          |    |                 |                          |                            |   |                          |                                              |       |                          |                                                                                      |   |                          |                                                                                        |                 |                          |                                                                                         |    |                             |                                       |     |                          |                                   |    |                          |                             |             |                          |                                                     |
| 13   | VZV                                                                             |                                                                                                                                                                             |                                                                                                                                                                                                                                                                                                                                                                                                                                                                                                                                                                                                                                                                                                                                                                                                                                                                                                                                                                                                                                                                                                                                                                                                       |   |                          |    |                 |                          |                            |   |                          |                                              |       |                          |                                                                                      |   |                          |                                                                                        |                 |                          |                                                                                         |    |                             |                                       |     |                          |                                   |    |                          |                             |             |                          |                                                     |
| 14   | Other virus                                                                     |                                                                                                                                                                             |                                                                                                                                                                                                                                                                                                                                                                                                                                                                                                                                                                                                                                                                                                                                                                                                                                                                                                                                                                                                                                                                                                                                                                                                       |   |                          |    |                 |                          |                            |   |                          |                                              |       |                          |                                                                                      |   |                          |                                                                                        |                 |                          |                                                                                         |    |                             |                                       |     |                          |                                   |    |                          |                             |             |                          |                                                     |
| 1356 | corticosteroids_v2<br>Show the field ONLY if:<br>[sepsis_suspicion_v2] = '1'    | Corticosteroids > 49 mg hydrocortisone equivalent?                                                                                                                          | dropdown<br><table border="1"> <tr><td>1</td><td>Yes</td></tr> <tr><td>0</td><td>No</td></tr> </table>                                                                                                                                                                                                                                                                                                                                                                                                                                                                                                                                                                                                                                                                                                                                                                                                                                                                                                                                                                                                                                                                                                | 1 | Yes                      | 0  | No              |                          |                            |   |                          |                                              |       |                          |                                                                                      |   |                          |                                                                                        |                 |                          |                                                                                         |    |                             |                                       |     |                          |                                   |    |                          |                             |             |                          |                                                     |
| 1    | Yes                                                                             |                                                                                                                                                                             |                                                                                                                                                                                                                                                                                                                                                                                                                                                                                                                                                                                                                                                                                                                                                                                                                                                                                                                                                                                                                                                                                                                                                                                                       |   |                          |    |                 |                          |                            |   |                          |                                              |       |                          |                                                                                      |   |                          |                                                                                        |                 |                          |                                                                                         |    |                             |                                       |     |                          |                                   |    |                          |                             |             |                          |                                                     |
| 0    | No                                                                              |                                                                                                                                                                             |                                                                                                                                                                                                                                                                                                                                                                                                                                                                                                                                                                                                                                                                                                                                                                                                                                                                                                                                                                                                                                                                                                                                                                                                       |   |                          |    |                 |                          |                            |   |                          |                                              |       |                          |                                                                                      |   |                          |                                                                                        |                 |                          |                                                                                         |    |                             |                                       |     |                          |                                   |    |                          |                             |             |                          |                                                     |
| 1357 | antibiotics_sepsis_v2<br>Show the field ONLY if:<br>[sepsis_suspicion_v2] = '1' | Antibiotics?                                                                                                                                                                | dropdown<br><table border="1"> <tr><td>1</td><td>Yes</td></tr> <tr><td>0</td><td>No</td></tr> </table>                                                                                                                                                                                                                                                                                                                                                                                                                                                                                                                                                                                                                                                                                                                                                                                                                                                                                                                                                                                                                                                                                                | 1 | Yes                      | 0  | No              |                          |                            |   |                          |                                              |       |                          |                                                                                      |   |                          |                                                                                        |                 |                          |                                                                                         |    |                             |                                       |     |                          |                                   |    |                          |                             |             |                          |                                                     |
| 1    | Yes                                                                             |                                                                                                                                                                             |                                                                                                                                                                                                                                                                                                                                                                                                                                                                                                                                                                                                                                                                                                                                                                                                                                                                                                                                                                                                                                                                                                                                                                                                       |   |                          |    |                 |                          |                            |   |                          |                                              |       |                          |                                                                                      |   |                          |                                                                                        |                 |                          |                                                                                         |    |                             |                                       |     |                          |                                   |    |                          |                             |             |                          |                                                     |
| 0    | No                                                                              |                                                                                                                                                                             |                                                                                                                                                                                                                                                                                                                                                                                                                                                                                                                                                                                                                                                                                                                                                                                                                                                                                                                                                                                                                                                                                                                                                                                                       |   |                          |    |                 |                          |                            |   |                          |                                              |       |                          |                                                                                      |   |                          |                                                                                        |                 |                          |                                                                                         |    |                             |                                       |     |                          |                                   |    |                          |                             |             |                          |                                                     |
| 1358 | days_antibiot_v2<br>Show the field ONLY if:<br>[antibiotics_sepsis_v2] = '1'    | Days on antibiotics?                                                                                                                                                        | text                                                                                                                                                                                                                                                                                                                                                                                                                                                                                                                                                                                                                                                                                                                                                                                                                                                                                                                                                                                                                                                                                                                                                                                                  |   |                          |    |                 |                          |                            |   |                          |                                              |       |                          |                                                                                      |   |                          |                                                                                        |                 |                          |                                                                                         |    |                             |                                       |     |                          |                                   |    |                          |                             |             |                          |                                                     |
| 1359 | severe_sepsis_crit_v2                                                           | Severe sepsis                                                                                                                                                               | checkbox<br><table border="1"> <tr><td>0</td><td>severe_sepsis_crit_v2__0</td><td>No</td></tr> <tr><td>1</td><td>severe_sepsis_crit_v2__1</td><td>Sepsis-induced hypotension</td></tr> <tr><td>2</td><td>severe_sepsis_crit_v2__2</td><td>Lactate above upper limits laboratory normal</td></tr> <tr><td>3</td><td>severe_sepsis_crit_v2__3</td><td>Urine output &lt; 0.5 mL/kg/hr for more than 2 hrs despite adequate fluid resuscitation</td></tr> <tr><td>4</td><td>severe_sepsis_crit_v2__4</td><td>Acute lung injury with Pao2/Fio2 &lt; 250 in the absence of pneumonia as infection source</td></tr> <tr><td>5</td><td>severe_sepsis_crit_v2__5</td><td>Acute lung injury with Pao2/Fio2 &lt; 200 in the presence of pneumonia as infection source</td></tr> <tr><td>6</td><td>severe_sepsis_crit_v2__6</td><td>Creatinine &gt; 2.0 mg/dL (176.8 ?mol/L)</td></tr> <tr><td>7</td><td>severe_sepsis_crit_v2__7</td><td>Bilirubin &gt; 2 mg/dL (34.2 ?mol/L)</td></tr> <tr><td>8</td><td>severe_sepsis_crit_v2__8</td><td>Platelet count &lt; 100,000 ?L</td></tr> <tr><td>9</td><td>severe_sepsis_crit_v2__9</td><td>Coagulopathy (international normalized ratio &gt; 1.5)</td></tr> </table> | 0 | severe_sepsis_crit_v2__0 | No | 1               | severe_sepsis_crit_v2__1 | Sepsis-induced hypotension | 2 | severe_sepsis_crit_v2__2 | Lactate above upper limits laboratory normal | 3     | severe_sepsis_crit_v2__3 | Urine output < 0.5 mL/kg/hr for more than 2 hrs despite adequate fluid resuscitation | 4 | severe_sepsis_crit_v2__4 | Acute lung injury with Pao2/Fio2 < 250 in the absence of pneumonia as infection source | 5               | severe_sepsis_crit_v2__5 | Acute lung injury with Pao2/Fio2 < 200 in the presence of pneumonia as infection source | 6  | severe_sepsis_crit_v2__6    | Creatinine > 2.0 mg/dL (176.8 ?mol/L) | 7   | severe_sepsis_crit_v2__7 | Bilirubin > 2 mg/dL (34.2 ?mol/L) | 8  | severe_sepsis_crit_v2__8 | Platelet count < 100,000 ?L | 9           | severe_sepsis_crit_v2__9 | Coagulopathy (international normalized ratio > 1.5) |
| 0    | severe_sepsis_crit_v2__0                                                        | No                                                                                                                                                                          |                                                                                                                                                                                                                                                                                                                                                                                                                                                                                                                                                                                                                                                                                                                                                                                                                                                                                                                                                                                                                                                                                                                                                                                                       |   |                          |    |                 |                          |                            |   |                          |                                              |       |                          |                                                                                      |   |                          |                                                                                        |                 |                          |                                                                                         |    |                             |                                       |     |                          |                                   |    |                          |                             |             |                          |                                                     |
| 1    | severe_sepsis_crit_v2__1                                                        | Sepsis-induced hypotension                                                                                                                                                  |                                                                                                                                                                                                                                                                                                                                                                                                                                                                                                                                                                                                                                                                                                                                                                                                                                                                                                                                                                                                                                                                                                                                                                                                       |   |                          |    |                 |                          |                            |   |                          |                                              |       |                          |                                                                                      |   |                          |                                                                                        |                 |                          |                                                                                         |    |                             |                                       |     |                          |                                   |    |                          |                             |             |                          |                                                     |
| 2    | severe_sepsis_crit_v2__2                                                        | Lactate above upper limits laboratory normal                                                                                                                                |                                                                                                                                                                                                                                                                                                                                                                                                                                                                                                                                                                                                                                                                                                                                                                                                                                                                                                                                                                                                                                                                                                                                                                                                       |   |                          |    |                 |                          |                            |   |                          |                                              |       |                          |                                                                                      |   |                          |                                                                                        |                 |                          |                                                                                         |    |                             |                                       |     |                          |                                   |    |                          |                             |             |                          |                                                     |
| 3    | severe_sepsis_crit_v2__3                                                        | Urine output < 0.5 mL/kg/hr for more than 2 hrs despite adequate fluid resuscitation                                                                                        |                                                                                                                                                                                                                                                                                                                                                                                                                                                                                                                                                                                                                                                                                                                                                                                                                                                                                                                                                                                                                                                                                                                                                                                                       |   |                          |    |                 |                          |                            |   |                          |                                              |       |                          |                                                                                      |   |                          |                                                                                        |                 |                          |                                                                                         |    |                             |                                       |     |                          |                                   |    |                          |                             |             |                          |                                                     |
| 4    | severe_sepsis_crit_v2__4                                                        | Acute lung injury with Pao2/Fio2 < 250 in the absence of pneumonia as infection source                                                                                      |                                                                                                                                                                                                                                                                                                                                                                                                                                                                                                                                                                                                                                                                                                                                                                                                                                                                                                                                                                                                                                                                                                                                                                                                       |   |                          |    |                 |                          |                            |   |                          |                                              |       |                          |                                                                                      |   |                          |                                                                                        |                 |                          |                                                                                         |    |                             |                                       |     |                          |                                   |    |                          |                             |             |                          |                                                     |
| 5    | severe_sepsis_crit_v2__5                                                        | Acute lung injury with Pao2/Fio2 < 200 in the presence of pneumonia as infection source                                                                                     |                                                                                                                                                                                                                                                                                                                                                                                                                                                                                                                                                                                                                                                                                                                                                                                                                                                                                                                                                                                                                                                                                                                                                                                                       |   |                          |    |                 |                          |                            |   |                          |                                              |       |                          |                                                                                      |   |                          |                                                                                        |                 |                          |                                                                                         |    |                             |                                       |     |                          |                                   |    |                          |                             |             |                          |                                                     |
| 6    | severe_sepsis_crit_v2__6                                                        | Creatinine > 2.0 mg/dL (176.8 ?mol/L)                                                                                                                                       |                                                                                                                                                                                                                                                                                                                                                                                                                                                                                                                                                                                                                                                                                                                                                                                                                                                                                                                                                                                                                                                                                                                                                                                                       |   |                          |    |                 |                          |                            |   |                          |                                              |       |                          |                                                                                      |   |                          |                                                                                        |                 |                          |                                                                                         |    |                             |                                       |     |                          |                                   |    |                          |                             |             |                          |                                                     |
| 7    | severe_sepsis_crit_v2__7                                                        | Bilirubin > 2 mg/dL (34.2 ?mol/L)                                                                                                                                           |                                                                                                                                                                                                                                                                                                                                                                                                                                                                                                                                                                                                                                                                                                                                                                                                                                                                                                                                                                                                                                                                                                                                                                                                       |   |                          |    |                 |                          |                            |   |                          |                                              |       |                          |                                                                                      |   |                          |                                                                                        |                 |                          |                                                                                         |    |                             |                                       |     |                          |                                   |    |                          |                             |             |                          |                                                     |
| 8    | severe_sepsis_crit_v2__8                                                        | Platelet count < 100,000 ?L                                                                                                                                                 |                                                                                                                                                                                                                                                                                                                                                                                                                                                                                                                                                                                                                                                                                                                                                                                                                                                                                                                                                                                                                                                                                                                                                                                                       |   |                          |    |                 |                          |                            |   |                          |                                              |       |                          |                                                                                      |   |                          |                                                                                        |                 |                          |                                                                                         |    |                             |                                       |     |                          |                                   |    |                          |                             |             |                          |                                                     |
| 9    | severe_sepsis_crit_v2__9                                                        | Coagulopathy (international normalized ratio > 1.5)                                                                                                                         |                                                                                                                                                                                                                                                                                                                                                                                                                                                                                                                                                                                                                                                                                                                                                                                                                                                                                                                                                                                                                                                                                                                                                                                                       |   |                          |    |                 |                          |                            |   |                          |                                              |       |                          |                                                                                      |   |                          |                                                                                        |                 |                          |                                                                                         |    |                             |                                       |     |                          |                                   |    |                          |                             |             |                          |                                                     |
| 1360 | severe_sepsis_v2                                                                | Severe Sepsis?<br><i>sepsis-induced tissue hypoperfusion or organ dysfunction (any of the above thought to be due to the infection)</i>                                     | dropdown<br><table border="1"> <tr><td>1</td><td>Yes</td></tr> <tr><td>0</td><td>No</td></tr> </table>                                                                                                                                                                                                                                                                                                                                                                                                                                                                                                                                                                                                                                                                                                                                                                                                                                                                                                                                                                                                                                                                                                | 1 | Yes                      | 0  | No              |                          |                            |   |                          |                                              |       |                          |                                                                                      |   |                          |                                                                                        |                 |                          |                                                                                         |    |                             |                                       |     |                          |                                   |    |                          |                             |             |                          |                                                     |
| 1    | Yes                                                                             |                                                                                                                                                                             |                                                                                                                                                                                                                                                                                                                                                                                                                                                                                                                                                                                                                                                                                                                                                                                                                                                                                                                                                                                                                                                                                                                                                                                                       |   |                          |    |                 |                          |                            |   |                          |                                              |       |                          |                                                                                      |   |                          |                                                                                        |                 |                          |                                                                                         |    |                             |                                       |     |                          |                                   |    |                          |                             |             |                          |                                                     |
| 0    | No                                                                              |                                                                                                                                                                             |                                                                                                                                                                                                                                                                                                                                                                                                                                                                                                                                                                                                                                                                                                                                                                                                                                                                                                                                                                                                                                                                                                                                                                                                       |   |                          |    |                 |                          |                            |   |                          |                                              |       |                          |                                                                                      |   |                          |                                                                                        |                 |                          |                                                                                         |    |                             |                                       |     |                          |                                   |    |                          |                             |             |                          |                                                     |
| 1361 | septic_shock_v2                                                                 | Septic Shock<br><i>Sepsis with hypotension (despite fluid resuscitation) PLUS hypoperfusion abnormalities</i>                                                               | dropdown<br><table border="1"> <tr><td>1</td><td>Yes</td></tr> <tr><td>0</td><td>No</td></tr> </table>                                                                                                                                                                                                                                                                                                                                                                                                                                                                                                                                                                                                                                                                                                                                                                                                                                                                                                                                                                                                                                                                                                | 1 | Yes                      | 0  | No              |                          |                            |   |                          |                                              |       |                          |                                                                                      |   |                          |                                                                                        |                 |                          |                                                                                         |    |                             |                                       |     |                          |                                   |    |                          |                             |             |                          |                                                     |
| 1    | Yes                                                                             |                                                                                                                                                                             |                                                                                                                                                                                                                                                                                                                                                                                                                                                                                                                                                                                                                                                                                                                                                                                                                                                                                                                                                                                                                                                                                                                                                                                                       |   |                          |    |                 |                          |                            |   |                          |                                              |       |                          |                                                                                      |   |                          |                                                                                        |                 |                          |                                                                                         |    |                             |                                       |     |                          |                                   |    |                          |                             |             |                          |                                                     |
| 0    | No                                                                              |                                                                                                                                                                             |                                                                                                                                                                                                                                                                                                                                                                                                                                                                                                                                                                                                                                                                                                                                                                                                                                                                                                                                                                                                                                                                                                                                                                                                       |   |                          |    |                 |                          |                            |   |                          |                                              |       |                          |                                                                                      |   |                          |                                                                                        |                 |                          |                                                                                         |    |                             |                                       |     |                          |                                   |    |                          |                             |             |                          |                                                     |
| 1362 | mods_v2                                                                         | Multiple Organ Dysfunction Syndrome<br><i>Presence of altered organ function in an acutely ill patient such that homeostasis cannot be maintained without intervention.</i> | dropdown<br><table border="1"> <tr><td>1</td><td>Yes</td></tr> <tr><td>0</td><td>No</td></tr> </table>                                                                                                                                                                                                                                                                                                                                                                                                                                                                                                                                                                                                                                                                                                                                                                                                                                                                                                                                                                                                                                                                                                | 1 | Yes                      | 0  | No              |                          |                            |   |                          |                                              |       |                          |                                                                                      |   |                          |                                                                                        |                 |                          |                                                                                         |    |                             |                                       |     |                          |                                   |    |                          |                             |             |                          |                                                     |
| 1    | Yes                                                                             |                                                                                                                                                                             |                                                                                                                                                                                                                                                                                                                                                                                                                                                                                                                                                                                                                                                                                                                                                                                                                                                                                                                                                                                                                                                                                                                                                                                                       |   |                          |    |                 |                          |                            |   |                          |                                              |       |                          |                                                                                      |   |                          |                                                                                        |                 |                          |                                                                                         |    |                             |                                       |     |                          |                                   |    |                          |                             |             |                          |                                                     |
| 0    | No                                                                              |                                                                                                                                                                             |                                                                                                                                                                                                                                                                                                                                                                                                                                                                                                                                                                                                                                                                                                                                                                                                                                                                                                                                                                                                                                                                                                                                                                                                       |   |                          |    |                 |                          |                            |   |                          |                                              |       |                          |                                                                                      |   |                          |                                                                                        |                 |                          |                                                                                         |    |                             |                                       |     |                          |                                   |    |                          |                             |             |                          |                                                     |

|                                                          |                                                                              |                                                 |                                                                                                                                                                                                                                                                                                                                                                              |   |                       |              |                        |                       |            |    |                        |               |   |                |            |   |                |                           |
|----------------------------------------------------------|------------------------------------------------------------------------------|-------------------------------------------------|------------------------------------------------------------------------------------------------------------------------------------------------------------------------------------------------------------------------------------------------------------------------------------------------------------------------------------------------------------------------------|---|-----------------------|--------------|------------------------|-----------------------|------------|----|------------------------|---------------|---|----------------|------------|---|----------------|---------------------------|
| 1363                                                     | sepsis_spectrum_qi_complete                                                  | Section Header: <i>Form Status</i><br>Complete? | dropdown<br><table border="1"> <tr><td>0</td><td>Incomplete</td></tr> <tr><td>1</td><td>Unverified</td></tr> <tr><td>2</td><td>Complete</td></tr> </table>                                                                                                                                                                                                                   | 0 | Incomplete            | 1            | Unverified             | 2                     | Complete   |    |                        |               |   |                |            |   |                |                           |
| 0                                                        | Incomplete                                                                   |                                                 |                                                                                                                                                                                                                                                                                                                                                                              |   |                       |              |                        |                       |            |    |                        |               |   |                |            |   |                |                           |
| 1                                                        | Unverified                                                                   |                                                 |                                                                                                                                                                                                                                                                                                                                                                              |   |                       |              |                        |                       |            |    |                        |               |   |                |            |   |                |                           |
| 2                                                        | Complete                                                                     |                                                 |                                                                                                                                                                                                                                                                                                                                                                              |   |                       |              |                        |                       |            |    |                        |               |   |                |            |   |                |                           |
| Instrument: <b>Chest Imaging (QI)</b> (chest_imaging_qi) |                                                                              |                                                 |                                                                                                                                                                                                                                                                                                                                                                              |   |                       |              |                        |                       |            |    |                        |               |   |                |            |   |                |                           |
| 1364                                                     | type_of_imaging_v2                                                           | Type of imaging taken                           | checkbox<br><table border="1"> <tr><td>1</td><td>type_of_imaging_v2__1</td><td>Chest X rays</td></tr> <tr><td>2</td><td>type_of_imaging_v2__2</td><td>CT scan</td></tr> <tr><td>99</td><td>type_of_imaging_v2__99</td><td>Not aplicable</td></tr> </table>                                                                                                                   | 1 | type_of_imaging_v2__1 | Chest X rays | 2                      | type_of_imaging_v2__2 | CT scan    | 99 | type_of_imaging_v2__99 | Not aplicable |   |                |            |   |                |                           |
| 1                                                        | type_of_imaging_v2__1                                                        | Chest X rays                                    |                                                                                                                                                                                                                                                                                                                                                                              |   |                       |              |                        |                       |            |    |                        |               |   |                |            |   |                |                           |
| 2                                                        | type_of_imaging_v2__2                                                        | CT scan                                         |                                                                                                                                                                                                                                                                                                                                                                              |   |                       |              |                        |                       |            |    |                        |               |   |                |            |   |                |                           |
| 99                                                       | type_of_imaging_v2__99                                                       | Not aplicable                                   |                                                                                                                                                                                                                                                                                                                                                                              |   |                       |              |                        |                       |            |    |                        |               |   |                |            |   |                |                           |
| 1365                                                     | cxr_date_v2<br>Show the field ONLY if:<br>[type_of_imaging_v2(1)] = '1'      | CXR date                                        | text (date_mdy)                                                                                                                                                                                                                                                                                                                                                              |   |                       |              |                        |                       |            |    |                        |               |   |                |            |   |                |                           |
| 1366                                                     | cxr_v2<br>Show the field ONLY if:<br>[type_of_imaging_v2(1)] = '1'           | Chest X ray alveolar consolidation              | checkbox<br><table border="1"> <tr><td>1</td><td>cxr_v2__1</td><td>Quadrant 1</td></tr> <tr><td>2</td><td>cxr_v2__2</td><td>Quadrant 2</td></tr> <tr><td>3</td><td>cxr_v2__3</td><td>Quadrant 3</td></tr> <tr><td>4</td><td>cxr_v2__4</td><td>Quadrant 4</td></tr> <tr><td>0</td><td>cxr_v2__0</td><td>No alveolar consolidation</td></tr> </table>                          | 1 | cxr_v2__1             | Quadrant 1   | 2                      | cxr_v2__2             | Quadrant 2 | 3  | cxr_v2__3              | Quadrant 3    | 4 | cxr_v2__4      | Quadrant 4 | 0 | cxr_v2__0      | No alveolar consolidation |
| 1                                                        | cxr_v2__1                                                                    | Quadrant 1                                      |                                                                                                                                                                                                                                                                                                                                                                              |   |                       |              |                        |                       |            |    |                        |               |   |                |            |   |                |                           |
| 2                                                        | cxr_v2__2                                                                    | Quadrant 2                                      |                                                                                                                                                                                                                                                                                                                                                                              |   |                       |              |                        |                       |            |    |                        |               |   |                |            |   |                |                           |
| 3                                                        | cxr_v2__3                                                                    | Quadrant 3                                      |                                                                                                                                                                                                                                                                                                                                                                              |   |                       |              |                        |                       |            |    |                        |               |   |                |            |   |                |                           |
| 4                                                        | cxr_v2__4                                                                    | Quadrant 4                                      |                                                                                                                                                                                                                                                                                                                                                                              |   |                       |              |                        |                       |            |    |                        |               |   |                |            |   |                |                           |
| 0                                                        | cxr_v2__0                                                                    | No alveolar consolidation                       |                                                                                                                                                                                                                                                                                                                                                                              |   |                       |              |                        |                       |            |    |                        |               |   |                |            |   |                |                           |
| 1367                                                     | rx_definition_v2<br>Show the field ONLY if:<br>[type_of_imaging_v2(1)] = '1' | Chest X ray definition                          | dropdown<br><table border="1"> <tr><td>1</td><td>Consistent with ARDS</td></tr> <tr><td>2</td><td>Inconsistent with ARDS</td></tr> <tr><td>0</td><td>equivocal</td></tr> </table>                                                                                                                                                                                            | 1 | Consistent with ARDS  | 2            | Inconsistent with ARDS | 0                     | equivocal  |    |                        |               |   |                |            |   |                |                           |
| 1                                                        | Consistent with ARDS                                                         |                                                 |                                                                                                                                                                                                                                                                                                                                                                              |   |                       |              |                        |                       |            |    |                        |               |   |                |            |   |                |                           |
| 2                                                        | Inconsistent with ARDS                                                       |                                                 |                                                                                                                                                                                                                                                                                                                                                                              |   |                       |              |                        |                       |            |    |                        |               |   |                |            |   |                |                           |
| 0                                                        | equivocal                                                                    |                                                 |                                                                                                                                                                                                                                                                                                                                                                              |   |                       |              |                        |                       |            |    |                        |               |   |                |            |   |                |                           |
| 1368                                                     | cxr2_v2                                                                      | Is there another X Ray?                         | dropdown<br><table border="1"> <tr><td>1</td><td>Yes</td></tr> <tr><td>0</td><td>No</td></tr> </table>                                                                                                                                                                                                                                                                       | 1 | Yes                   | 0            | No                     |                       |            |    |                        |               |   |                |            |   |                |                           |
| 1                                                        | Yes                                                                          |                                                 |                                                                                                                                                                                                                                                                                                                                                                              |   |                       |              |                        |                       |            |    |                        |               |   |                |            |   |                |                           |
| 0                                                        | No                                                                           |                                                 |                                                                                                                                                                                                                                                                                                                                                                              |   |                       |              |                        |                       |            |    |                        |               |   |                |            |   |                |                           |
| 1369                                                     | cxr_date2_ea6_v2<br>Show the field ONLY if:<br>[cxr2_v2] = '1'               | CXR date                                        | text (date_mdy)                                                                                                                                                                                                                                                                                                                                                              |   |                       |              |                        |                       |            |    |                        |               |   |                |            |   |                |                           |
| 1370                                                     | cxr2_728_v2<br>Show the field ONLY if:<br>[cxr2_v2] = '1'                    | Chest X ray alveolar consolidation              | checkbox<br><table border="1"> <tr><td>1</td><td>cxr2_728_v2__1</td><td>Quadrant 1</td></tr> <tr><td>2</td><td>cxr2_728_v2__2</td><td>Quadrant 2</td></tr> <tr><td>3</td><td>cxr2_728_v2__3</td><td>Quadrant 3</td></tr> <tr><td>4</td><td>cxr2_728_v2__4</td><td>Quadrant 4</td></tr> <tr><td>0</td><td>cxr2_728_v2__0</td><td>No alveolar consolidation</td></tr> </table> | 1 | cxr2_728_v2__1        | Quadrant 1   | 2                      | cxr2_728_v2__2        | Quadrant 2 | 3  | cxr2_728_v2__3         | Quadrant 3    | 4 | cxr2_728_v2__4 | Quadrant 4 | 0 | cxr2_728_v2__0 | No alveolar consolidation |
| 1                                                        | cxr2_728_v2__1                                                               | Quadrant 1                                      |                                                                                                                                                                                                                                                                                                                                                                              |   |                       |              |                        |                       |            |    |                        |               |   |                |            |   |                |                           |
| 2                                                        | cxr2_728_v2__2                                                               | Quadrant 2                                      |                                                                                                                                                                                                                                                                                                                                                                              |   |                       |              |                        |                       |            |    |                        |               |   |                |            |   |                |                           |
| 3                                                        | cxr2_728_v2__3                                                               | Quadrant 3                                      |                                                                                                                                                                                                                                                                                                                                                                              |   |                       |              |                        |                       |            |    |                        |               |   |                |            |   |                |                           |
| 4                                                        | cxr2_728_v2__4                                                               | Quadrant 4                                      |                                                                                                                                                                                                                                                                                                                                                                              |   |                       |              |                        |                       |            |    |                        |               |   |                |            |   |                |                           |
| 0                                                        | cxr2_728_v2__0                                                               | No alveolar consolidation                       |                                                                                                                                                                                                                                                                                                                                                                              |   |                       |              |                        |                       |            |    |                        |               |   |                |            |   |                |                           |
| 1371                                                     | rx_definition2_d10_v2<br>Show the field ONLY if:<br>[cxr2_v2] = '1'          | Chest X ray definition                          | dropdown<br><table border="1"> <tr><td>1</td><td>Consistent with ARDS</td></tr> <tr><td>2</td><td>Inconsistent with ARDS</td></tr> <tr><td>0</td><td>equivocal</td></tr> </table>                                                                                                                                                                                            | 1 | Consistent with ARDS  | 2            | Inconsistent with ARDS | 0                     | equivocal  |    |                        |               |   |                |            |   |                |                           |
| 1                                                        | Consistent with ARDS                                                         |                                                 |                                                                                                                                                                                                                                                                                                                                                                              |   |                       |              |                        |                       |            |    |                        |               |   |                |            |   |                |                           |
| 2                                                        | Inconsistent with ARDS                                                       |                                                 |                                                                                                                                                                                                                                                                                                                                                                              |   |                       |              |                        |                       |            |    |                        |               |   |                |            |   |                |                           |
| 0                                                        | equivocal                                                                    |                                                 |                                                                                                                                                                                                                                                                                                                                                                              |   |                       |              |                        |                       |            |    |                        |               |   |                |            |   |                |                           |
| 1372                                                     | cxr3_v2                                                                      | Is there another X Ray?                         | dropdown<br><table border="1"> <tr><td>1</td><td>Yes</td></tr> <tr><td>0</td><td>No</td></tr> </table>                                                                                                                                                                                                                                                                       | 1 | Yes                   | 0            | No                     |                       |            |    |                        |               |   |                |            |   |                |                           |
| 1                                                        | Yes                                                                          |                                                 |                                                                                                                                                                                                                                                                                                                                                                              |   |                       |              |                        |                       |            |    |                        |               |   |                |            |   |                |                           |
| 0                                                        | No                                                                           |                                                 |                                                                                                                                                                                                                                                                                                                                                                              |   |                       |              |                        |                       |            |    |                        |               |   |                |            |   |                |                           |
| 1373                                                     | cxr_date2_8f2_v2<br>Show the field ONLY if:<br>[cxr3_v2] = '1'               | CXR date                                        | text (date_mdy)                                                                                                                                                                                                                                                                                                                                                              |   |                       |              |                        |                       |            |    |                        |               |   |                |            |   |                |                           |
| 1374                                                     | cxr2_ba4_v2<br>Show the field ONLY if:<br>[cxr3_v2] = '1'                    | Chest X ray alveolar consolidation              | checkbox<br><table border="1"> <tr><td>1</td><td>cxr2_ba4_v2__1</td><td>Quadrant 1</td></tr> <tr><td>2</td><td>cxr2_ba4_v2__2</td><td>Quadrant 2</td></tr> <tr><td>3</td><td>cxr2_ba4_v2__3</td><td>Quadrant 3</td></tr> <tr><td>4</td><td>cxr2_ba4_v2__4</td><td>Quadrant 4</td></tr> <tr><td>0</td><td>cxr2_ba4_v2__0</td><td>No alveolar consolidation</td></tr> </table> | 1 | cxr2_ba4_v2__1        | Quadrant 1   | 2                      | cxr2_ba4_v2__2        | Quadrant 2 | 3  | cxr2_ba4_v2__3         | Quadrant 3    | 4 | cxr2_ba4_v2__4 | Quadrant 4 | 0 | cxr2_ba4_v2__0 | No alveolar consolidation |
| 1                                                        | cxr2_ba4_v2__1                                                               | Quadrant 1                                      |                                                                                                                                                                                                                                                                                                                                                                              |   |                       |              |                        |                       |            |    |                        |               |   |                |            |   |                |                           |
| 2                                                        | cxr2_ba4_v2__2                                                               | Quadrant 2                                      |                                                                                                                                                                                                                                                                                                                                                                              |   |                       |              |                        |                       |            |    |                        |               |   |                |            |   |                |                           |
| 3                                                        | cxr2_ba4_v2__3                                                               | Quadrant 3                                      |                                                                                                                                                                                                                                                                                                                                                                              |   |                       |              |                        |                       |            |    |                        |               |   |                |            |   |                |                           |
| 4                                                        | cxr2_ba4_v2__4                                                               | Quadrant 4                                      |                                                                                                                                                                                                                                                                                                                                                                              |   |                       |              |                        |                       |            |    |                        |               |   |                |            |   |                |                           |
| 0                                                        | cxr2_ba4_v2__0                                                               | No alveolar consolidation                       |                                                                                                                                                                                                                                                                                                                                                                              |   |                       |              |                        |                       |            |    |                        |               |   |                |            |   |                |                           |
| 1375                                                     | rx_definition2_437_v2<br>Show the field ONLY if:<br>[cxr3_v2] = '1'          | Chest X ray definition                          | dropdown<br><table border="1"> <tr><td>1</td><td>Consistent with ARDS</td></tr> <tr><td>2</td><td>Inconsistent with ARDS</td></tr> <tr><td>0</td><td>equivocal</td></tr> </table>                                                                                                                                                                                            | 1 | Consistent with ARDS  | 2            | Inconsistent with ARDS | 0                     | equivocal  |    |                        |               |   |                |            |   |                |                           |
| 1                                                        | Consistent with ARDS                                                         |                                                 |                                                                                                                                                                                                                                                                                                                                                                              |   |                       |              |                        |                       |            |    |                        |               |   |                |            |   |                |                           |
| 2                                                        | Inconsistent with ARDS                                                       |                                                 |                                                                                                                                                                                                                                                                                                                                                                              |   |                       |              |                        |                       |            |    |                        |               |   |                |            |   |                |                           |
| 0                                                        | equivocal                                                                    |                                                 |                                                                                                                                                                                                                                                                                                                                                                              |   |                       |              |                        |                       |            |    |                        |               |   |                |            |   |                |                           |

|      |                                                                     |                                    |                                                                                                                                                                                                                                                                                                                                                                              |   |                      |            |                        |                |            |   |                |            |   |                |            |   |                |                           |
|------|---------------------------------------------------------------------|------------------------------------|------------------------------------------------------------------------------------------------------------------------------------------------------------------------------------------------------------------------------------------------------------------------------------------------------------------------------------------------------------------------------|---|----------------------|------------|------------------------|----------------|------------|---|----------------|------------|---|----------------|------------|---|----------------|---------------------------|
| 1376 | cxr4_v2                                                             | Is there another X Ray?            | dropdown<br><table border="1"> <tr><td>1</td><td>Yes</td></tr> <tr><td>0</td><td>No</td></tr> </table>                                                                                                                                                                                                                                                                       | 1 | Yes                  | 0          | No                     |                |            |   |                |            |   |                |            |   |                |                           |
| 1    | Yes                                                                 |                                    |                                                                                                                                                                                                                                                                                                                                                                              |   |                      |            |                        |                |            |   |                |            |   |                |            |   |                |                           |
| 0    | No                                                                  |                                    |                                                                                                                                                                                                                                                                                                                                                                              |   |                      |            |                        |                |            |   |                |            |   |                |            |   |                |                           |
| 1377 | cxr_date2_9de_v2<br>Show the field ONLY if:<br>[cxr4_v2] = '1'      | CXR date                           | text (date_mdy)                                                                                                                                                                                                                                                                                                                                                              |   |                      |            |                        |                |            |   |                |            |   |                |            |   |                |                           |
| 1378 | cxr2_07f_v2<br>Show the field ONLY if:<br>[cxr4_v2] = '1'           | Chest X ray alveolar consolidation | checkbox<br><table border="1"> <tr><td>1</td><td>cxr2_07f_v2__1</td><td>Quadrant 1</td></tr> <tr><td>2</td><td>cxr2_07f_v2__2</td><td>Quadrant 2</td></tr> <tr><td>3</td><td>cxr2_07f_v2__3</td><td>Quadrant 3</td></tr> <tr><td>4</td><td>cxr2_07f_v2__4</td><td>Quadrant 4</td></tr> <tr><td>0</td><td>cxr2_07f_v2__0</td><td>No alveolar consolidation</td></tr> </table> | 1 | cxr2_07f_v2__1       | Quadrant 1 | 2                      | cxr2_07f_v2__2 | Quadrant 2 | 3 | cxr2_07f_v2__3 | Quadrant 3 | 4 | cxr2_07f_v2__4 | Quadrant 4 | 0 | cxr2_07f_v2__0 | No alveolar consolidation |
| 1    | cxr2_07f_v2__1                                                      | Quadrant 1                         |                                                                                                                                                                                                                                                                                                                                                                              |   |                      |            |                        |                |            |   |                |            |   |                |            |   |                |                           |
| 2    | cxr2_07f_v2__2                                                      | Quadrant 2                         |                                                                                                                                                                                                                                                                                                                                                                              |   |                      |            |                        |                |            |   |                |            |   |                |            |   |                |                           |
| 3    | cxr2_07f_v2__3                                                      | Quadrant 3                         |                                                                                                                                                                                                                                                                                                                                                                              |   |                      |            |                        |                |            |   |                |            |   |                |            |   |                |                           |
| 4    | cxr2_07f_v2__4                                                      | Quadrant 4                         |                                                                                                                                                                                                                                                                                                                                                                              |   |                      |            |                        |                |            |   |                |            |   |                |            |   |                |                           |
| 0    | cxr2_07f_v2__0                                                      | No alveolar consolidation          |                                                                                                                                                                                                                                                                                                                                                                              |   |                      |            |                        |                |            |   |                |            |   |                |            |   |                |                           |
| 1379 | rx_definition2_4f8_v2<br>Show the field ONLY if:<br>[cxr4_v2] = '1' | Chest X ray definition             | dropdown<br><table border="1"> <tr><td>1</td><td>Consistent with ARDS</td></tr> <tr><td>2</td><td>Inconsistent with ARDS</td></tr> <tr><td>0</td><td>equivocal</td></tr> </table>                                                                                                                                                                                            | 1 | Consistent with ARDS | 2          | Inconsistent with ARDS | 0              | equivocal  |   |                |            |   |                |            |   |                |                           |
| 1    | Consistent with ARDS                                                |                                    |                                                                                                                                                                                                                                                                                                                                                                              |   |                      |            |                        |                |            |   |                |            |   |                |            |   |                |                           |
| 2    | Inconsistent with ARDS                                              |                                    |                                                                                                                                                                                                                                                                                                                                                                              |   |                      |            |                        |                |            |   |                |            |   |                |            |   |                |                           |
| 0    | equivocal                                                           |                                    |                                                                                                                                                                                                                                                                                                                                                                              |   |                      |            |                        |                |            |   |                |            |   |                |            |   |                |                           |
| 1380 | cxr5_v2                                                             | Is there another X Ray?            | dropdown<br><table border="1"> <tr><td>1</td><td>Yes</td></tr> <tr><td>0</td><td>No</td></tr> </table>                                                                                                                                                                                                                                                                       | 1 | Yes                  | 0          | No                     |                |            |   |                |            |   |                |            |   |                |                           |
| 1    | Yes                                                                 |                                    |                                                                                                                                                                                                                                                                                                                                                                              |   |                      |            |                        |                |            |   |                |            |   |                |            |   |                |                           |
| 0    | No                                                                  |                                    |                                                                                                                                                                                                                                                                                                                                                                              |   |                      |            |                        |                |            |   |                |            |   |                |            |   |                |                           |
| 1381 | cxr_date2_4b9_v2<br>Show the field ONLY if:<br>[cxr5_v2] = '1'      | CXR date                           | text (date_mdy)                                                                                                                                                                                                                                                                                                                                                              |   |                      |            |                        |                |            |   |                |            |   |                |            |   |                |                           |
| 1382 | cxr2_22c_v2<br>Show the field ONLY if:<br>[cxr5_v2] = '1'           | Chest X ray alveolar consolidation | checkbox<br><table border="1"> <tr><td>1</td><td>cxr2_22c_v2__1</td><td>Quadrant 1</td></tr> <tr><td>2</td><td>cxr2_22c_v2__2</td><td>Quadrant 2</td></tr> <tr><td>3</td><td>cxr2_22c_v2__3</td><td>Quadrant 3</td></tr> <tr><td>4</td><td>cxr2_22c_v2__4</td><td>Quadrant 4</td></tr> <tr><td>0</td><td>cxr2_22c_v2__0</td><td>No alveolar consolidation</td></tr> </table> | 1 | cxr2_22c_v2__1       | Quadrant 1 | 2                      | cxr2_22c_v2__2 | Quadrant 2 | 3 | cxr2_22c_v2__3 | Quadrant 3 | 4 | cxr2_22c_v2__4 | Quadrant 4 | 0 | cxr2_22c_v2__0 | No alveolar consolidation |
| 1    | cxr2_22c_v2__1                                                      | Quadrant 1                         |                                                                                                                                                                                                                                                                                                                                                                              |   |                      |            |                        |                |            |   |                |            |   |                |            |   |                |                           |
| 2    | cxr2_22c_v2__2                                                      | Quadrant 2                         |                                                                                                                                                                                                                                                                                                                                                                              |   |                      |            |                        |                |            |   |                |            |   |                |            |   |                |                           |
| 3    | cxr2_22c_v2__3                                                      | Quadrant 3                         |                                                                                                                                                                                                                                                                                                                                                                              |   |                      |            |                        |                |            |   |                |            |   |                |            |   |                |                           |
| 4    | cxr2_22c_v2__4                                                      | Quadrant 4                         |                                                                                                                                                                                                                                                                                                                                                                              |   |                      |            |                        |                |            |   |                |            |   |                |            |   |                |                           |
| 0    | cxr2_22c_v2__0                                                      | No alveolar consolidation          |                                                                                                                                                                                                                                                                                                                                                                              |   |                      |            |                        |                |            |   |                |            |   |                |            |   |                |                           |
| 1383 | rx_definition2_f55_v2<br>Show the field ONLY if:<br>[cxr5_v2] = '1' | Chest X ray definition             | dropdown<br><table border="1"> <tr><td>1</td><td>Consistent with ARDS</td></tr> <tr><td>2</td><td>Inconsistent with ARDS</td></tr> <tr><td>0</td><td>equivocal</td></tr> </table>                                                                                                                                                                                            | 1 | Consistent with ARDS | 2          | Inconsistent with ARDS | 0              | equivocal  |   |                |            |   |                |            |   |                |                           |
| 1    | Consistent with ARDS                                                |                                    |                                                                                                                                                                                                                                                                                                                                                                              |   |                      |            |                        |                |            |   |                |            |   |                |            |   |                |                           |
| 2    | Inconsistent with ARDS                                              |                                    |                                                                                                                                                                                                                                                                                                                                                                              |   |                      |            |                        |                |            |   |                |            |   |                |            |   |                |                           |
| 0    | equivocal                                                           |                                    |                                                                                                                                                                                                                                                                                                                                                                              |   |                      |            |                        |                |            |   |                |            |   |                |            |   |                |                           |
| 1384 | cxr6_v2                                                             | Is there another X Ray?            | dropdown<br><table border="1"> <tr><td>1</td><td>Yes</td></tr> <tr><td>0</td><td>No</td></tr> </table>                                                                                                                                                                                                                                                                       | 1 | Yes                  | 0          | No                     |                |            |   |                |            |   |                |            |   |                |                           |
| 1    | Yes                                                                 |                                    |                                                                                                                                                                                                                                                                                                                                                                              |   |                      |            |                        |                |            |   |                |            |   |                |            |   |                |                           |
| 0    | No                                                                  |                                    |                                                                                                                                                                                                                                                                                                                                                                              |   |                      |            |                        |                |            |   |                |            |   |                |            |   |                |                           |
| 1385 | cxr_date2_ee9_v2<br>Show the field ONLY if:<br>[cxr5_v2] = '1'      | CXR date                           | text (date_mdy)                                                                                                                                                                                                                                                                                                                                                              |   |                      |            |                        |                |            |   |                |            |   |                |            |   |                |                           |
| 1386 | cxr2_f43_v2<br>Show the field ONLY if:<br>[cxr5_v2] = '1'           | Chest X ray alveolar consolidation | checkbox<br><table border="1"> <tr><td>1</td><td>cxr2_f43_v2__1</td><td>Quadrant 1</td></tr> <tr><td>2</td><td>cxr2_f43_v2__2</td><td>Quadrant 2</td></tr> <tr><td>3</td><td>cxr2_f43_v2__3</td><td>Quadrant 3</td></tr> <tr><td>4</td><td>cxr2_f43_v2__4</td><td>Quadrant 4</td></tr> <tr><td>0</td><td>cxr2_f43_v2__0</td><td>No alveolar consolidation</td></tr> </table> | 1 | cxr2_f43_v2__1       | Quadrant 1 | 2                      | cxr2_f43_v2__2 | Quadrant 2 | 3 | cxr2_f43_v2__3 | Quadrant 3 | 4 | cxr2_f43_v2__4 | Quadrant 4 | 0 | cxr2_f43_v2__0 | No alveolar consolidation |
| 1    | cxr2_f43_v2__1                                                      | Quadrant 1                         |                                                                                                                                                                                                                                                                                                                                                                              |   |                      |            |                        |                |            |   |                |            |   |                |            |   |                |                           |
| 2    | cxr2_f43_v2__2                                                      | Quadrant 2                         |                                                                                                                                                                                                                                                                                                                                                                              |   |                      |            |                        |                |            |   |                |            |   |                |            |   |                |                           |
| 3    | cxr2_f43_v2__3                                                      | Quadrant 3                         |                                                                                                                                                                                                                                                                                                                                                                              |   |                      |            |                        |                |            |   |                |            |   |                |            |   |                |                           |
| 4    | cxr2_f43_v2__4                                                      | Quadrant 4                         |                                                                                                                                                                                                                                                                                                                                                                              |   |                      |            |                        |                |            |   |                |            |   |                |            |   |                |                           |
| 0    | cxr2_f43_v2__0                                                      | No alveolar consolidation          |                                                                                                                                                                                                                                                                                                                                                                              |   |                      |            |                        |                |            |   |                |            |   |                |            |   |                |                           |
| 1387 | rx_definition2_091_v2<br>Show the field ONLY if:<br>[cxr5_v2] = '1' | Chest X ray definition             | dropdown<br><table border="1"> <tr><td>1</td><td>Consistent with ARDS</td></tr> <tr><td>2</td><td>Inconsistent with ARDS</td></tr> <tr><td>0</td><td>equivocal</td></tr> </table>                                                                                                                                                                                            | 1 | Consistent with ARDS | 2          | Inconsistent with ARDS | 0              | equivocal  |   |                |            |   |                |            |   |                |                           |
| 1    | Consistent with ARDS                                                |                                    |                                                                                                                                                                                                                                                                                                                                                                              |   |                      |            |                        |                |            |   |                |            |   |                |            |   |                |                           |
| 2    | Inconsistent with ARDS                                              |                                    |                                                                                                                                                                                                                                                                                                                                                                              |   |                      |            |                        |                |            |   |                |            |   |                |            |   |                |                           |
| 0    | equivocal                                                           |                                    |                                                                                                                                                                                                                                                                                                                                                                              |   |                      |            |                        |                |            |   |                |            |   |                |            |   |                |                           |
| 1388 | cxr7_v2                                                             | Is there another X Ray?            | dropdown<br><table border="1"> <tr><td>1</td><td>Yes</td></tr> <tr><td>0</td><td>No</td></tr> </table>                                                                                                                                                                                                                                                                       | 1 | Yes                  | 0          | No                     |                |            |   |                |            |   |                |            |   |                |                           |
| 1    | Yes                                                                 |                                    |                                                                                                                                                                                                                                                                                                                                                                              |   |                      |            |                        |                |            |   |                |            |   |                |            |   |                |                           |
| 0    | No                                                                  |                                    |                                                                                                                                                                                                                                                                                                                                                                              |   |                      |            |                        |                |            |   |                |            |   |                |            |   |                |                           |
| 1389 | cxr_date2_ed2_v2<br>Show the field ONLY if:<br>[cxr6_v2] = '1'      | CXR date                           | text (date_mdy)                                                                                                                                                                                                                                                                                                                                                              |   |                      |            |                        |                |            |   |                |            |   |                |            |   |                |                           |

|      |                                                                     |                                    |                                                                                                                                                                                                                                                                                                                                                                              |   |                      |            |                        |                |            |   |                |            |   |                |            |   |                |                           |
|------|---------------------------------------------------------------------|------------------------------------|------------------------------------------------------------------------------------------------------------------------------------------------------------------------------------------------------------------------------------------------------------------------------------------------------------------------------------------------------------------------------|---|----------------------|------------|------------------------|----------------|------------|---|----------------|------------|---|----------------|------------|---|----------------|---------------------------|
| 1390 | cxr2_78d_v2<br>Show the field ONLY if:<br>[cxr6_v2] = '1'           | Chest X ray alveolar consolidation | checkbox<br><table border="1"> <tr><td>1</td><td>cxr2_78d_v2__1</td><td>Quadrant 1</td></tr> <tr><td>2</td><td>cxr2_78d_v2__2</td><td>Quadrant 2</td></tr> <tr><td>3</td><td>cxr2_78d_v2__3</td><td>Quadrant 3</td></tr> <tr><td>4</td><td>cxr2_78d_v2__4</td><td>Quadrant 4</td></tr> <tr><td>0</td><td>cxr2_78d_v2__0</td><td>No alveolar consolidation</td></tr> </table> | 1 | cxr2_78d_v2__1       | Quadrant 1 | 2                      | cxr2_78d_v2__2 | Quadrant 2 | 3 | cxr2_78d_v2__3 | Quadrant 3 | 4 | cxr2_78d_v2__4 | Quadrant 4 | 0 | cxr2_78d_v2__0 | No alveolar consolidation |
| 1    | cxr2_78d_v2__1                                                      | Quadrant 1                         |                                                                                                                                                                                                                                                                                                                                                                              |   |                      |            |                        |                |            |   |                |            |   |                |            |   |                |                           |
| 2    | cxr2_78d_v2__2                                                      | Quadrant 2                         |                                                                                                                                                                                                                                                                                                                                                                              |   |                      |            |                        |                |            |   |                |            |   |                |            |   |                |                           |
| 3    | cxr2_78d_v2__3                                                      | Quadrant 3                         |                                                                                                                                                                                                                                                                                                                                                                              |   |                      |            |                        |                |            |   |                |            |   |                |            |   |                |                           |
| 4    | cxr2_78d_v2__4                                                      | Quadrant 4                         |                                                                                                                                                                                                                                                                                                                                                                              |   |                      |            |                        |                |            |   |                |            |   |                |            |   |                |                           |
| 0    | cxr2_78d_v2__0                                                      | No alveolar consolidation          |                                                                                                                                                                                                                                                                                                                                                                              |   |                      |            |                        |                |            |   |                |            |   |                |            |   |                |                           |
| 1391 | rx_definition2_3b4_v2<br>Show the field ONLY if:<br>[cxr6_v2] = '1' | Chest X ray definition             | dropdown<br><table border="1"> <tr><td>1</td><td>Consistent with ARDS</td></tr> <tr><td>2</td><td>Inconsistent with ARDS</td></tr> <tr><td>0</td><td>equivocal</td></tr> </table>                                                                                                                                                                                            | 1 | Consistent with ARDS | 2          | Inconsistent with ARDS | 0              | equivocal  |   |                |            |   |                |            |   |                |                           |
| 1    | Consistent with ARDS                                                |                                    |                                                                                                                                                                                                                                                                                                                                                                              |   |                      |            |                        |                |            |   |                |            |   |                |            |   |                |                           |
| 2    | Inconsistent with ARDS                                              |                                    |                                                                                                                                                                                                                                                                                                                                                                              |   |                      |            |                        |                |            |   |                |            |   |                |            |   |                |                           |
| 0    | equivocal                                                           |                                    |                                                                                                                                                                                                                                                                                                                                                                              |   |                      |            |                        |                |            |   |                |            |   |                |            |   |                |                           |
| 1392 | cxr8_v2                                                             | Is there another X Ray?            | dropdown<br><table border="1"> <tr><td>1</td><td>Yes</td></tr> <tr><td>0</td><td>No</td></tr> </table>                                                                                                                                                                                                                                                                       | 1 | Yes                  | 0          | No                     |                |            |   |                |            |   |                |            |   |                |                           |
| 1    | Yes                                                                 |                                    |                                                                                                                                                                                                                                                                                                                                                                              |   |                      |            |                        |                |            |   |                |            |   |                |            |   |                |                           |
| 0    | No                                                                  |                                    |                                                                                                                                                                                                                                                                                                                                                                              |   |                      |            |                        |                |            |   |                |            |   |                |            |   |                |                           |
| 1393 | cxr_date2_e56_v2<br>Show the field ONLY if:<br>[cxr8_v2] = '1'      | CXR date                           | text (date_mdy)                                                                                                                                                                                                                                                                                                                                                              |   |                      |            |                        |                |            |   |                |            |   |                |            |   |                |                           |
| 1394 | cxr2_ffv_v2<br>Show the field ONLY if:<br>[cxr8_v2] = '1'           | Chest X ray alveolar consolidation | checkbox<br><table border="1"> <tr><td>1</td><td>cxr2_ffv_v2__1</td><td>Quadrant 1</td></tr> <tr><td>2</td><td>cxr2_ffv_v2__2</td><td>Quadrant 2</td></tr> <tr><td>3</td><td>cxr2_ffv_v2__3</td><td>Quadrant 3</td></tr> <tr><td>4</td><td>cxr2_ffv_v2__4</td><td>Quadrant 4</td></tr> <tr><td>0</td><td>cxr2_ffv_v2__0</td><td>No alveolar consolidation</td></tr> </table> | 1 | cxr2_ffv_v2__1       | Quadrant 1 | 2                      | cxr2_ffv_v2__2 | Quadrant 2 | 3 | cxr2_ffv_v2__3 | Quadrant 3 | 4 | cxr2_ffv_v2__4 | Quadrant 4 | 0 | cxr2_ffv_v2__0 | No alveolar consolidation |
| 1    | cxr2_ffv_v2__1                                                      | Quadrant 1                         |                                                                                                                                                                                                                                                                                                                                                                              |   |                      |            |                        |                |            |   |                |            |   |                |            |   |                |                           |
| 2    | cxr2_ffv_v2__2                                                      | Quadrant 2                         |                                                                                                                                                                                                                                                                                                                                                                              |   |                      |            |                        |                |            |   |                |            |   |                |            |   |                |                           |
| 3    | cxr2_ffv_v2__3                                                      | Quadrant 3                         |                                                                                                                                                                                                                                                                                                                                                                              |   |                      |            |                        |                |            |   |                |            |   |                |            |   |                |                           |
| 4    | cxr2_ffv_v2__4                                                      | Quadrant 4                         |                                                                                                                                                                                                                                                                                                                                                                              |   |                      |            |                        |                |            |   |                |            |   |                |            |   |                |                           |
| 0    | cxr2_ffv_v2__0                                                      | No alveolar consolidation          |                                                                                                                                                                                                                                                                                                                                                                              |   |                      |            |                        |                |            |   |                |            |   |                |            |   |                |                           |
| 1395 | rx_definition2_75a_v2<br>Show the field ONLY if:<br>[cxr8_v2] = '1' | Chest X ray definition             | dropdown<br><table border="1"> <tr><td>1</td><td>Consistent with ARDS</td></tr> <tr><td>2</td><td>Inconsistent with ARDS</td></tr> <tr><td>0</td><td>equivocal</td></tr> </table>                                                                                                                                                                                            | 1 | Consistent with ARDS | 2          | Inconsistent with ARDS | 0              | equivocal  |   |                |            |   |                |            |   |                |                           |
| 1    | Consistent with ARDS                                                |                                    |                                                                                                                                                                                                                                                                                                                                                                              |   |                      |            |                        |                |            |   |                |            |   |                |            |   |                |                           |
| 2    | Inconsistent with ARDS                                              |                                    |                                                                                                                                                                                                                                                                                                                                                                              |   |                      |            |                        |                |            |   |                |            |   |                |            |   |                |                           |
| 0    | equivocal                                                           |                                    |                                                                                                                                                                                                                                                                                                                                                                              |   |                      |            |                        |                |            |   |                |            |   |                |            |   |                |                           |
| 1396 | cxr9_v2                                                             | Is there another X Ray?            | dropdown<br><table border="1"> <tr><td>1</td><td>Yes</td></tr> <tr><td>0</td><td>No</td></tr> </table>                                                                                                                                                                                                                                                                       | 1 | Yes                  | 0          | No                     |                |            |   |                |            |   |                |            |   |                |                           |
| 1    | Yes                                                                 |                                    |                                                                                                                                                                                                                                                                                                                                                                              |   |                      |            |                        |                |            |   |                |            |   |                |            |   |                |                           |
| 0    | No                                                                  |                                    |                                                                                                                                                                                                                                                                                                                                                                              |   |                      |            |                        |                |            |   |                |            |   |                |            |   |                |                           |
| 1397 | cxr_date2_8a6_v2<br>Show the field ONLY if:<br>[cxr9_v2] = '1'      | CXR date                           | text (date_mdy)                                                                                                                                                                                                                                                                                                                                                              |   |                      |            |                        |                |            |   |                |            |   |                |            |   |                |                           |
| 1398 | cxr2_bbe_v2<br>Show the field ONLY if:<br>[cxr9_v2] = '1'           | Chest X ray alveolar consolidation | checkbox<br><table border="1"> <tr><td>1</td><td>cxr2_bbe_v2__1</td><td>Quadrant 1</td></tr> <tr><td>2</td><td>cxr2_bbe_v2__2</td><td>Quadrant 2</td></tr> <tr><td>3</td><td>cxr2_bbe_v2__3</td><td>Quadrant 3</td></tr> <tr><td>4</td><td>cxr2_bbe_v2__4</td><td>Quadrant 4</td></tr> <tr><td>0</td><td>cxr2_bbe_v2__0</td><td>No alveolar consolidation</td></tr> </table> | 1 | cxr2_bbe_v2__1       | Quadrant 1 | 2                      | cxr2_bbe_v2__2 | Quadrant 2 | 3 | cxr2_bbe_v2__3 | Quadrant 3 | 4 | cxr2_bbe_v2__4 | Quadrant 4 | 0 | cxr2_bbe_v2__0 | No alveolar consolidation |
| 1    | cxr2_bbe_v2__1                                                      | Quadrant 1                         |                                                                                                                                                                                                                                                                                                                                                                              |   |                      |            |                        |                |            |   |                |            |   |                |            |   |                |                           |
| 2    | cxr2_bbe_v2__2                                                      | Quadrant 2                         |                                                                                                                                                                                                                                                                                                                                                                              |   |                      |            |                        |                |            |   |                |            |   |                |            |   |                |                           |
| 3    | cxr2_bbe_v2__3                                                      | Quadrant 3                         |                                                                                                                                                                                                                                                                                                                                                                              |   |                      |            |                        |                |            |   |                |            |   |                |            |   |                |                           |
| 4    | cxr2_bbe_v2__4                                                      | Quadrant 4                         |                                                                                                                                                                                                                                                                                                                                                                              |   |                      |            |                        |                |            |   |                |            |   |                |            |   |                |                           |
| 0    | cxr2_bbe_v2__0                                                      | No alveolar consolidation          |                                                                                                                                                                                                                                                                                                                                                                              |   |                      |            |                        |                |            |   |                |            |   |                |            |   |                |                           |
| 1399 | rx_definition2_e34_v2<br>Show the field ONLY if:<br>[cxr9_v2] = '1' | Chest X ray definition             | dropdown<br><table border="1"> <tr><td>1</td><td>Consistent with ARDS</td></tr> <tr><td>2</td><td>Inconsistent with ARDS</td></tr> <tr><td>0</td><td>equivocal</td></tr> </table>                                                                                                                                                                                            | 1 | Consistent with ARDS | 2          | Inconsistent with ARDS | 0              | equivocal  |   |                |            |   |                |            |   |                |                           |
| 1    | Consistent with ARDS                                                |                                    |                                                                                                                                                                                                                                                                                                                                                                              |   |                      |            |                        |                |            |   |                |            |   |                |            |   |                |                           |
| 2    | Inconsistent with ARDS                                              |                                    |                                                                                                                                                                                                                                                                                                                                                                              |   |                      |            |                        |                |            |   |                |            |   |                |            |   |                |                           |
| 0    | equivocal                                                           |                                    |                                                                                                                                                                                                                                                                                                                                                                              |   |                      |            |                        |                |            |   |                |            |   |                |            |   |                |                           |
| 1400 | cxr10_v2                                                            | Is there another X Ray?            | dropdown<br><table border="1"> <tr><td>1</td><td>Yes</td></tr> <tr><td>0</td><td>No</td></tr> </table>                                                                                                                                                                                                                                                                       | 1 | Yes                  | 0          | No                     |                |            |   |                |            |   |                |            |   |                |                           |
| 1    | Yes                                                                 |                                    |                                                                                                                                                                                                                                                                                                                                                                              |   |                      |            |                        |                |            |   |                |            |   |                |            |   |                |                           |
| 0    | No                                                                  |                                    |                                                                                                                                                                                                                                                                                                                                                                              |   |                      |            |                        |                |            |   |                |            |   |                |            |   |                |                           |
| 1401 | cxr_date2_c4f_v2<br>Show the field ONLY if:<br>[cxr10_v2] = '1'     | CXR date                           | text (date_mdy)                                                                                                                                                                                                                                                                                                                                                              |   |                      |            |                        |                |            |   |                |            |   |                |            |   |                |                           |
| 1402 | cxr2_6a2_v2<br>Show the field ONLY if:<br>[cxr10_v2] = '1'          | Chest X ray alveolar consolidation | checkbox<br><table border="1"> <tr><td>1</td><td>cxr2_6a2_v2__1</td><td>Quadrant 1</td></tr> <tr><td>2</td><td>cxr2_6a2_v2__2</td><td>Quadrant 2</td></tr> <tr><td>3</td><td>cxr2_6a2_v2__3</td><td>Quadrant 3</td></tr> <tr><td>4</td><td>cxr2_6a2_v2__4</td><td>Quadrant 4</td></tr> <tr><td>0</td><td>cxr2_6a2_v2__0</td><td>No alveolar consolidation</td></tr> </table> | 1 | cxr2_6a2_v2__1       | Quadrant 1 | 2                      | cxr2_6a2_v2__2 | Quadrant 2 | 3 | cxr2_6a2_v2__3 | Quadrant 3 | 4 | cxr2_6a2_v2__4 | Quadrant 4 | 0 | cxr2_6a2_v2__0 | No alveolar consolidation |
| 1    | cxr2_6a2_v2__1                                                      | Quadrant 1                         |                                                                                                                                                                                                                                                                                                                                                                              |   |                      |            |                        |                |            |   |                |            |   |                |            |   |                |                           |
| 2    | cxr2_6a2_v2__2                                                      | Quadrant 2                         |                                                                                                                                                                                                                                                                                                                                                                              |   |                      |            |                        |                |            |   |                |            |   |                |            |   |                |                           |
| 3    | cxr2_6a2_v2__3                                                      | Quadrant 3                         |                                                                                                                                                                                                                                                                                                                                                                              |   |                      |            |                        |                |            |   |                |            |   |                |            |   |                |                           |
| 4    | cxr2_6a2_v2__4                                                      | Quadrant 4                         |                                                                                                                                                                                                                                                                                                                                                                              |   |                      |            |                        |                |            |   |                |            |   |                |            |   |                |                           |
| 0    | cxr2_6a2_v2__0                                                      | No alveolar consolidation          |                                                                                                                                                                                                                                                                                                                                                                              |   |                      |            |                        |                |            |   |                |            |   |                |            |   |                |                           |

|                                       |                                                                               |                                                                                                                                                                                                                                                                     |                                                                                                                                                                                                                                                                                                                                                                                                                                                                                                                                                                                                                                                                                                                                                                                                                                                                                                                                                                                                                                                                                                                                                                                            |   |                      |                       |                        |                   |                                |   |                   |                  |   |                   |                    |   |                   |         |   |                   |       |   |                   |          |   |                   |                                         |   |                   |         |    |                    |                       |    |                    |                  |    |                    |                    |    |                    |                     |    |                    |             |    |                    |                   |    |                    |       |
|---------------------------------------|-------------------------------------------------------------------------------|---------------------------------------------------------------------------------------------------------------------------------------------------------------------------------------------------------------------------------------------------------------------|--------------------------------------------------------------------------------------------------------------------------------------------------------------------------------------------------------------------------------------------------------------------------------------------------------------------------------------------------------------------------------------------------------------------------------------------------------------------------------------------------------------------------------------------------------------------------------------------------------------------------------------------------------------------------------------------------------------------------------------------------------------------------------------------------------------------------------------------------------------------------------------------------------------------------------------------------------------------------------------------------------------------------------------------------------------------------------------------------------------------------------------------------------------------------------------------|---|----------------------|-----------------------|------------------------|-------------------|--------------------------------|---|-------------------|------------------|---|-------------------|--------------------|---|-------------------|---------|---|-------------------|-------|---|-------------------|----------|---|-------------------|-----------------------------------------|---|-------------------|---------|----|--------------------|-----------------------|----|--------------------|------------------|----|--------------------|--------------------|----|--------------------|---------------------|----|--------------------|-------------|----|--------------------|-------------------|----|--------------------|-------|
| 1403                                  | rx_definition2_5e0_v2<br>Show the field ONLY if:<br>[cxr10_v2] = '1'          | Chest X ray definition                                                                                                                                                                                                                                              | dropdown<br><table border="1"> <tr><td>1</td><td>Consistent with ARDS</td></tr> <tr><td>2</td><td>Inconsistent with ARDS</td></tr> <tr><td>0</td><td>equivocal</td></tr> </table>                                                                                                                                                                                                                                                                                                                                                                                                                                                                                                                                                                                                                                                                                                                                                                                                                                                                                                                                                                                                          | 1 | Consistent with ARDS | 2                     | Inconsistent with ARDS | 0                 | equivocal                      |   |                   |                  |   |                   |                    |   |                   |         |   |                   |       |   |                   |          |   |                   |                                         |   |                   |         |    |                    |                       |    |                    |                  |    |                    |                    |    |                    |                     |    |                    |             |    |                    |                   |    |                    |       |
| 1                                     | Consistent with ARDS                                                          |                                                                                                                                                                                                                                                                     |                                                                                                                                                                                                                                                                                                                                                                                                                                                                                                                                                                                                                                                                                                                                                                                                                                                                                                                                                                                                                                                                                                                                                                                            |   |                      |                       |                        |                   |                                |   |                   |                  |   |                   |                    |   |                   |         |   |                   |       |   |                   |          |   |                   |                                         |   |                   |         |    |                    |                       |    |                    |                  |    |                    |                    |    |                    |                     |    |                    |             |    |                    |                   |    |                    |       |
| 2                                     | Inconsistent with ARDS                                                        |                                                                                                                                                                                                                                                                     |                                                                                                                                                                                                                                                                                                                                                                                                                                                                                                                                                                                                                                                                                                                                                                                                                                                                                                                                                                                                                                                                                                                                                                                            |   |                      |                       |                        |                   |                                |   |                   |                  |   |                   |                    |   |                   |         |   |                   |       |   |                   |          |   |                   |                                         |   |                   |         |    |                    |                       |    |                    |                  |    |                    |                    |    |                    |                     |    |                    |             |    |                    |                   |    |                    |       |
| 0                                     | equivocal                                                                     |                                                                                                                                                                                                                                                                     |                                                                                                                                                                                                                                                                                                                                                                                                                                                                                                                                                                                                                                                                                                                                                                                                                                                                                                                                                                                                                                                                                                                                                                                            |   |                      |                       |                        |                   |                                |   |                   |                  |   |                   |                    |   |                   |         |   |                   |       |   |                   |          |   |                   |                                         |   |                   |         |    |                    |                       |    |                    |                  |    |                    |                    |    |                    |                     |    |                    |             |    |                    |                   |    |                    |       |
| 1404                                  | ct_date_v2<br>Show the field ONLY if:<br>[type_of_imaging_v2(2)] = '1'        | CT scan date                                                                                                                                                                                                                                                        | text (date_mdy)                                                                                                                                                                                                                                                                                                                                                                                                                                                                                                                                                                                                                                                                                                                                                                                                                                                                                                                                                                                                                                                                                                                                                                            |   |                      |                       |                        |                   |                                |   |                   |                  |   |                   |                    |   |                   |         |   |                   |       |   |                   |          |   |                   |                                         |   |                   |         |    |                    |                       |    |                    |                  |    |                    |                    |    |                    |                     |    |                    |             |    |                    |                   |    |                    |       |
| 1405                                  | ct_findings_v2<br>Show the field ONLY if:<br>[type_of_imaging_v2(2)] = '1'    | CT findings                                                                                                                                                                                                                                                         | checkbox<br><table border="1"> <tr><td>1</td><td>ct_findings_v2__1</td><td>Severe atelectasis</td></tr> <tr><td>2</td><td>ct_findings_v2__2</td><td>Alveolar consolidation</td></tr> <tr><td>3</td><td>ct_findings_v2__3</td><td>Pleural effusion</td></tr> <tr><td>4</td><td>ct_findings_v2__4</td><td>Pulmonary embolism</td></tr> <tr><td>0</td><td>ct_findings_v2__0</td><td>Other</td></tr> </table>                                                                                                                                                                                                                                                                                                                                                                                                                                                                                                                                                                                                                                                                                                                                                                                  | 1 | ct_findings_v2__1    | Severe atelectasis    | 2                      | ct_findings_v2__2 | Alveolar consolidation         | 3 | ct_findings_v2__3 | Pleural effusion | 4 | ct_findings_v2__4 | Pulmonary embolism | 0 | ct_findings_v2__0 | Other   |   |                   |       |   |                   |          |   |                   |                                         |   |                   |         |    |                    |                       |    |                    |                  |    |                    |                    |    |                    |                     |    |                    |             |    |                    |                   |    |                    |       |
| 1                                     | ct_findings_v2__1                                                             | Severe atelectasis                                                                                                                                                                                                                                                  |                                                                                                                                                                                                                                                                                                                                                                                                                                                                                                                                                                                                                                                                                                                                                                                                                                                                                                                                                                                                                                                                                                                                                                                            |   |                      |                       |                        |                   |                                |   |                   |                  |   |                   |                    |   |                   |         |   |                   |       |   |                   |          |   |                   |                                         |   |                   |         |    |                    |                       |    |                    |                  |    |                    |                    |    |                    |                     |    |                    |             |    |                    |                   |    |                    |       |
| 2                                     | ct_findings_v2__2                                                             | Alveolar consolidation                                                                                                                                                                                                                                              |                                                                                                                                                                                                                                                                                                                                                                                                                                                                                                                                                                                                                                                                                                                                                                                                                                                                                                                                                                                                                                                                                                                                                                                            |   |                      |                       |                        |                   |                                |   |                   |                  |   |                   |                    |   |                   |         |   |                   |       |   |                   |          |   |                   |                                         |   |                   |         |    |                    |                       |    |                    |                  |    |                    |                    |    |                    |                     |    |                    |             |    |                    |                   |    |                    |       |
| 3                                     | ct_findings_v2__3                                                             | Pleural effusion                                                                                                                                                                                                                                                    |                                                                                                                                                                                                                                                                                                                                                                                                                                                                                                                                                                                                                                                                                                                                                                                                                                                                                                                                                                                                                                                                                                                                                                                            |   |                      |                       |                        |                   |                                |   |                   |                  |   |                   |                    |   |                   |         |   |                   |       |   |                   |          |   |                   |                                         |   |                   |         |    |                    |                       |    |                    |                  |    |                    |                    |    |                    |                     |    |                    |             |    |                    |                   |    |                    |       |
| 4                                     | ct_findings_v2__4                                                             | Pulmonary embolism                                                                                                                                                                                                                                                  |                                                                                                                                                                                                                                                                                                                                                                                                                                                                                                                                                                                                                                                                                                                                                                                                                                                                                                                                                                                                                                                                                                                                                                                            |   |                      |                       |                        |                   |                                |   |                   |                  |   |                   |                    |   |                   |         |   |                   |       |   |                   |          |   |                   |                                         |   |                   |         |    |                    |                       |    |                    |                  |    |                    |                    |    |                    |                     |    |                    |             |    |                    |                   |    |                    |       |
| 0                                     | ct_findings_v2__0                                                             | Other                                                                                                                                                                                                                                                               |                                                                                                                                                                                                                                                                                                                                                                                                                                                                                                                                                                                                                                                                                                                                                                                                                                                                                                                                                                                                                                                                                                                                                                                            |   |                      |                       |                        |                   |                                |   |                   |                  |   |                   |                    |   |                   |         |   |                   |       |   |                   |          |   |                   |                                         |   |                   |         |    |                    |                       |    |                    |                  |    |                    |                    |    |                    |                     |    |                    |             |    |                    |                   |    |                    |       |
| 1406                                  | chest_imaging_qi_complete                                                     | Section Header: <i>Form Status</i><br>Complete?                                                                                                                                                                                                                     | dropdown<br><table border="1"> <tr><td>0</td><td>Incomplete</td></tr> <tr><td>1</td><td>Unverified</td></tr> <tr><td>2</td><td>Complete</td></tr> </table>                                                                                                                                                                                                                                                                                                                                                                                                                                                                                                                                                                                                                                                                                                                                                                                                                                                                                                                                                                                                                                 | 0 | Incomplete           | 1                     | Unverified             | 2                 | Complete                       |   |                   |                  |   |                   |                    |   |                   |         |   |                   |       |   |                   |          |   |                   |                                         |   |                   |         |    |                    |                       |    |                    |                  |    |                    |                    |    |                    |                     |    |                    |             |    |                    |                   |    |                    |       |
| 0                                     | Incomplete                                                                    |                                                                                                                                                                                                                                                                     |                                                                                                                                                                                                                                                                                                                                                                                                                                                                                                                                                                                                                                                                                                                                                                                                                                                                                                                                                                                                                                                                                                                                                                                            |   |                      |                       |                        |                   |                                |   |                   |                  |   |                   |                    |   |                   |         |   |                   |       |   |                   |          |   |                   |                                         |   |                   |         |    |                    |                       |    |                    |                  |    |                    |                    |    |                    |                     |    |                    |             |    |                    |                   |    |                    |       |
| 1                                     | Unverified                                                                    |                                                                                                                                                                                                                                                                     |                                                                                                                                                                                                                                                                                                                                                                                                                                                                                                                                                                                                                                                                                                                                                                                                                                                                                                                                                                                                                                                                                                                                                                                            |   |                      |                       |                        |                   |                                |   |                   |                  |   |                   |                    |   |                   |         |   |                   |       |   |                   |          |   |                   |                                         |   |                   |         |    |                    |                       |    |                    |                  |    |                    |                    |    |                    |                     |    |                    |             |    |                    |                   |    |                    |       |
| 2                                     | Complete                                                                      |                                                                                                                                                                                                                                                                     |                                                                                                                                                                                                                                                                                                                                                                                                                                                                                                                                                                                                                                                                                                                                                                                                                                                                                                                                                                                                                                                                                                                                                                                            |   |                      |                       |                        |                   |                                |   |                   |                  |   |                   |                    |   |                   |         |   |                   |       |   |                   |          |   |                   |                                         |   |                   |         |    |                    |                       |    |                    |                  |    |                    |                    |    |                    |                     |    |                    |             |    |                    |                   |    |                    |       |
| Instrument: <b>COVID-19</b> (covid19) |                                                                               |                                                                                                                                                                                                                                                                     |                                                                                                                                                                                                                                                                                                                                                                                                                                                                                                                                                                                                                                                                                                                                                                                                                                                                                                                                                                                                                                                                                                                                                                                            |   |                      |                       |                        |                   |                                |   |                   |                  |   |                   |                    |   |                   |         |   |                   |       |   |                   |          |   |                   |                                         |   |                   |         |    |                    |                       |    |                    |                  |    |                    |                    |    |                    |                     |    |                    |             |    |                    |                   |    |                    |       |
| 1407                                  | covid_sample_date                                                             | Section Header: <i>General Information: This is the instrument designed for COVID positive patients in BOCI. Please provide values for all fields below with the closest information to the sample collection date you could find.</i><br>Date of sample collection | text (date_mdy)                                                                                                                                                                                                                                                                                                                                                                                                                                                                                                                                                                                                                                                                                                                                                                                                                                                                                                                                                                                                                                                                                                                                                                            |   |                      |                       |                        |                   |                                |   |                   |                  |   |                   |                    |   |                   |         |   |                   |       |   |                   |          |   |                   |                                         |   |                   |         |    |                    |                       |    |                    |                  |    |                    |                    |    |                    |                     |    |                    |             |    |                    |                   |    |                    |       |
| 1408                                  | covid_admit                                                                   | Source of Admission to the ICU                                                                                                                                                                                                                                      | radio<br><table border="1"> <tr><td>1</td><td>Emergency Department</td></tr> <tr><td>2</td><td>Hospital Ward</td></tr> <tr><td>3</td><td>Transfer From Another Hospital</td></tr> <tr><td>4</td><td>Other</td></tr> </table>                                                                                                                                                                                                                                                                                                                                                                                                                                                                                                                                                                                                                                                                                                                                                                                                                                                                                                                                                               | 1 | Emergency Department | 2                     | Hospital Ward          | 3                 | Transfer From Another Hospital | 4 | Other             |                  |   |                   |                    |   |                   |         |   |                   |       |   |                   |          |   |                   |                                         |   |                   |         |    |                    |                       |    |                    |                  |    |                    |                    |    |                    |                     |    |                    |             |    |                    |                   |    |                    |       |
| 1                                     | Emergency Department                                                          |                                                                                                                                                                                                                                                                     |                                                                                                                                                                                                                                                                                                                                                                                                                                                                                                                                                                                                                                                                                                                                                                                                                                                                                                                                                                                                                                                                                                                                                                                            |   |                      |                       |                        |                   |                                |   |                   |                  |   |                   |                    |   |                   |         |   |                   |       |   |                   |          |   |                   |                                         |   |                   |         |    |                    |                       |    |                    |                  |    |                    |                    |    |                    |                     |    |                    |             |    |                    |                   |    |                    |       |
| 2                                     | Hospital Ward                                                                 |                                                                                                                                                                                                                                                                     |                                                                                                                                                                                                                                                                                                                                                                                                                                                                                                                                                                                                                                                                                                                                                                                                                                                                                                                                                                                                                                                                                                                                                                                            |   |                      |                       |                        |                   |                                |   |                   |                  |   |                   |                    |   |                   |         |   |                   |       |   |                   |          |   |                   |                                         |   |                   |         |    |                    |                       |    |                    |                  |    |                    |                    |    |                    |                     |    |                    |             |    |                    |                   |    |                    |       |
| 3                                     | Transfer From Another Hospital                                                |                                                                                                                                                                                                                                                                     |                                                                                                                                                                                                                                                                                                                                                                                                                                                                                                                                                                                                                                                                                                                                                                                                                                                                                                                                                                                                                                                                                                                                                                                            |   |                      |                       |                        |                   |                                |   |                   |                  |   |                   |                    |   |                   |         |   |                   |       |   |                   |          |   |                   |                                         |   |                   |         |    |                    |                       |    |                    |                  |    |                    |                    |    |                    |                     |    |                    |             |    |                    |                   |    |                    |       |
| 4                                     | Other                                                                         |                                                                                                                                                                                                                                                                     |                                                                                                                                                                                                                                                                                                                                                                                                                                                                                                                                                                                                                                                                                                                                                                                                                                                                                                                                                                                                                                                                                                                                                                                            |   |                      |                       |                        |                   |                                |   |                   |                  |   |                   |                    |   |                   |         |   |                   |       |   |                   |          |   |                   |                                         |   |                   |         |    |                    |                       |    |                    |                  |    |                    |                    |    |                    |                     |    |                    |             |    |                    |                   |    |                    |       |
| 1409                                  | covid_symptoms_date                                                           | Date of first symptoms (estimate if no exact information is available)                                                                                                                                                                                              | text (date_mdy)                                                                                                                                                                                                                                                                                                                                                                                                                                                                                                                                                                                                                                                                                                                                                                                                                                                                                                                                                                                                                                                                                                                                                                            |   |                      |                       |                        |                   |                                |   |                   |                  |   |                   |                    |   |                   |         |   |                   |       |   |                   |          |   |                   |                                         |   |                   |         |    |                    |                       |    |                    |                  |    |                    |                    |    |                    |                     |    |                    |             |    |                    |                   |    |                    |       |
| 1410                                  | covid_symptoms                                                                | Symptoms that were present before ICU admission (select all that apply)                                                                                                                                                                                             | checkbox<br><table border="1"> <tr><td>1</td><td>covid_symptoms__1</td><td>Altered Mental Status</td></tr> <tr><td>2</td><td>covid_symptoms__2</td><td>Chills</td></tr> <tr><td>3</td><td>covid_symptoms__3</td><td>Cough</td></tr> <tr><td>4</td><td>covid_symptoms__4</td><td>Diarrhea</td></tr> <tr><td>5</td><td>covid_symptoms__5</td><td>Fatigue</td></tr> <tr><td>6</td><td>covid_symptoms__6</td><td>Fever</td></tr> <tr><td>7</td><td>covid_symptoms__7</td><td>Headache</td></tr> <tr><td>8</td><td>covid_symptoms__8</td><td>Hemorrhage (GI, Hemoptysis, Ecchymosis)</td></tr> <tr><td>9</td><td>covid_symptoms__9</td><td>Malaise</td></tr> <tr><td>10</td><td>covid_symptoms__10</td><td>Myalgia or Arthralgia</td></tr> <tr><td>11</td><td>covid_symptoms__11</td><td>Nasal Congestion</td></tr> <tr><td>12</td><td>covid_symptoms__12</td><td>Nausea or Vomiting</td></tr> <tr><td>13</td><td>covid_symptoms__13</td><td>Shortness of Breath</td></tr> <tr><td>14</td><td>covid_symptoms__14</td><td>Sore Throat</td></tr> <tr><td>15</td><td>covid_symptoms__15</td><td>Sputum Production</td></tr> <tr><td>16</td><td>covid_symptoms__16</td><td>Other</td></tr> </table> | 1 | covid_symptoms__1    | Altered Mental Status | 2                      | covid_symptoms__2 | Chills                         | 3 | covid_symptoms__3 | Cough            | 4 | covid_symptoms__4 | Diarrhea           | 5 | covid_symptoms__5 | Fatigue | 6 | covid_symptoms__6 | Fever | 7 | covid_symptoms__7 | Headache | 8 | covid_symptoms__8 | Hemorrhage (GI, Hemoptysis, Ecchymosis) | 9 | covid_symptoms__9 | Malaise | 10 | covid_symptoms__10 | Myalgia or Arthralgia | 11 | covid_symptoms__11 | Nasal Congestion | 12 | covid_symptoms__12 | Nausea or Vomiting | 13 | covid_symptoms__13 | Shortness of Breath | 14 | covid_symptoms__14 | Sore Throat | 15 | covid_symptoms__15 | Sputum Production | 16 | covid_symptoms__16 | Other |
| 1                                     | covid_symptoms__1                                                             | Altered Mental Status                                                                                                                                                                                                                                               |                                                                                                                                                                                                                                                                                                                                                                                                                                                                                                                                                                                                                                                                                                                                                                                                                                                                                                                                                                                                                                                                                                                                                                                            |   |                      |                       |                        |                   |                                |   |                   |                  |   |                   |                    |   |                   |         |   |                   |       |   |                   |          |   |                   |                                         |   |                   |         |    |                    |                       |    |                    |                  |    |                    |                    |    |                    |                     |    |                    |             |    |                    |                   |    |                    |       |
| 2                                     | covid_symptoms__2                                                             | Chills                                                                                                                                                                                                                                                              |                                                                                                                                                                                                                                                                                                                                                                                                                                                                                                                                                                                                                                                                                                                                                                                                                                                                                                                                                                                                                                                                                                                                                                                            |   |                      |                       |                        |                   |                                |   |                   |                  |   |                   |                    |   |                   |         |   |                   |       |   |                   |          |   |                   |                                         |   |                   |         |    |                    |                       |    |                    |                  |    |                    |                    |    |                    |                     |    |                    |             |    |                    |                   |    |                    |       |
| 3                                     | covid_symptoms__3                                                             | Cough                                                                                                                                                                                                                                                               |                                                                                                                                                                                                                                                                                                                                                                                                                                                                                                                                                                                                                                                                                                                                                                                                                                                                                                                                                                                                                                                                                                                                                                                            |   |                      |                       |                        |                   |                                |   |                   |                  |   |                   |                    |   |                   |         |   |                   |       |   |                   |          |   |                   |                                         |   |                   |         |    |                    |                       |    |                    |                  |    |                    |                    |    |                    |                     |    |                    |             |    |                    |                   |    |                    |       |
| 4                                     | covid_symptoms__4                                                             | Diarrhea                                                                                                                                                                                                                                                            |                                                                                                                                                                                                                                                                                                                                                                                                                                                                                                                                                                                                                                                                                                                                                                                                                                                                                                                                                                                                                                                                                                                                                                                            |   |                      |                       |                        |                   |                                |   |                   |                  |   |                   |                    |   |                   |         |   |                   |       |   |                   |          |   |                   |                                         |   |                   |         |    |                    |                       |    |                    |                  |    |                    |                    |    |                    |                     |    |                    |             |    |                    |                   |    |                    |       |
| 5                                     | covid_symptoms__5                                                             | Fatigue                                                                                                                                                                                                                                                             |                                                                                                                                                                                                                                                                                                                                                                                                                                                                                                                                                                                                                                                                                                                                                                                                                                                                                                                                                                                                                                                                                                                                                                                            |   |                      |                       |                        |                   |                                |   |                   |                  |   |                   |                    |   |                   |         |   |                   |       |   |                   |          |   |                   |                                         |   |                   |         |    |                    |                       |    |                    |                  |    |                    |                    |    |                    |                     |    |                    |             |    |                    |                   |    |                    |       |
| 6                                     | covid_symptoms__6                                                             | Fever                                                                                                                                                                                                                                                               |                                                                                                                                                                                                                                                                                                                                                                                                                                                                                                                                                                                                                                                                                                                                                                                                                                                                                                                                                                                                                                                                                                                                                                                            |   |                      |                       |                        |                   |                                |   |                   |                  |   |                   |                    |   |                   |         |   |                   |       |   |                   |          |   |                   |                                         |   |                   |         |    |                    |                       |    |                    |                  |    |                    |                    |    |                    |                     |    |                    |             |    |                    |                   |    |                    |       |
| 7                                     | covid_symptoms__7                                                             | Headache                                                                                                                                                                                                                                                            |                                                                                                                                                                                                                                                                                                                                                                                                                                                                                                                                                                                                                                                                                                                                                                                                                                                                                                                                                                                                                                                                                                                                                                                            |   |                      |                       |                        |                   |                                |   |                   |                  |   |                   |                    |   |                   |         |   |                   |       |   |                   |          |   |                   |                                         |   |                   |         |    |                    |                       |    |                    |                  |    |                    |                    |    |                    |                     |    |                    |             |    |                    |                   |    |                    |       |
| 8                                     | covid_symptoms__8                                                             | Hemorrhage (GI, Hemoptysis, Ecchymosis)                                                                                                                                                                                                                             |                                                                                                                                                                                                                                                                                                                                                                                                                                                                                                                                                                                                                                                                                                                                                                                                                                                                                                                                                                                                                                                                                                                                                                                            |   |                      |                       |                        |                   |                                |   |                   |                  |   |                   |                    |   |                   |         |   |                   |       |   |                   |          |   |                   |                                         |   |                   |         |    |                    |                       |    |                    |                  |    |                    |                    |    |                    |                     |    |                    |             |    |                    |                   |    |                    |       |
| 9                                     | covid_symptoms__9                                                             | Malaise                                                                                                                                                                                                                                                             |                                                                                                                                                                                                                                                                                                                                                                                                                                                                                                                                                                                                                                                                                                                                                                                                                                                                                                                                                                                                                                                                                                                                                                                            |   |                      |                       |                        |                   |                                |   |                   |                  |   |                   |                    |   |                   |         |   |                   |       |   |                   |          |   |                   |                                         |   |                   |         |    |                    |                       |    |                    |                  |    |                    |                    |    |                    |                     |    |                    |             |    |                    |                   |    |                    |       |
| 10                                    | covid_symptoms__10                                                            | Myalgia or Arthralgia                                                                                                                                                                                                                                               |                                                                                                                                                                                                                                                                                                                                                                                                                                                                                                                                                                                                                                                                                                                                                                                                                                                                                                                                                                                                                                                                                                                                                                                            |   |                      |                       |                        |                   |                                |   |                   |                  |   |                   |                    |   |                   |         |   |                   |       |   |                   |          |   |                   |                                         |   |                   |         |    |                    |                       |    |                    |                  |    |                    |                    |    |                    |                     |    |                    |             |    |                    |                   |    |                    |       |
| 11                                    | covid_symptoms__11                                                            | Nasal Congestion                                                                                                                                                                                                                                                    |                                                                                                                                                                                                                                                                                                                                                                                                                                                                                                                                                                                                                                                                                                                                                                                                                                                                                                                                                                                                                                                                                                                                                                                            |   |                      |                       |                        |                   |                                |   |                   |                  |   |                   |                    |   |                   |         |   |                   |       |   |                   |          |   |                   |                                         |   |                   |         |    |                    |                       |    |                    |                  |    |                    |                    |    |                    |                     |    |                    |             |    |                    |                   |    |                    |       |
| 12                                    | covid_symptoms__12                                                            | Nausea or Vomiting                                                                                                                                                                                                                                                  |                                                                                                                                                                                                                                                                                                                                                                                                                                                                                                                                                                                                                                                                                                                                                                                                                                                                                                                                                                                                                                                                                                                                                                                            |   |                      |                       |                        |                   |                                |   |                   |                  |   |                   |                    |   |                   |         |   |                   |       |   |                   |          |   |                   |                                         |   |                   |         |    |                    |                       |    |                    |                  |    |                    |                    |    |                    |                     |    |                    |             |    |                    |                   |    |                    |       |
| 13                                    | covid_symptoms__13                                                            | Shortness of Breath                                                                                                                                                                                                                                                 |                                                                                                                                                                                                                                                                                                                                                                                                                                                                                                                                                                                                                                                                                                                                                                                                                                                                                                                                                                                                                                                                                                                                                                                            |   |                      |                       |                        |                   |                                |   |                   |                  |   |                   |                    |   |                   |         |   |                   |       |   |                   |          |   |                   |                                         |   |                   |         |    |                    |                       |    |                    |                  |    |                    |                    |    |                    |                     |    |                    |             |    |                    |                   |    |                    |       |
| 14                                    | covid_symptoms__14                                                            | Sore Throat                                                                                                                                                                                                                                                         |                                                                                                                                                                                                                                                                                                                                                                                                                                                                                                                                                                                                                                                                                                                                                                                                                                                                                                                                                                                                                                                                                                                                                                                            |   |                      |                       |                        |                   |                                |   |                   |                  |   |                   |                    |   |                   |         |   |                   |       |   |                   |          |   |                   |                                         |   |                   |         |    |                    |                       |    |                    |                  |    |                    |                    |    |                    |                     |    |                    |             |    |                    |                   |    |                    |       |
| 15                                    | covid_symptoms__15                                                            | Sputum Production                                                                                                                                                                                                                                                   |                                                                                                                                                                                                                                                                                                                                                                                                                                                                                                                                                                                                                                                                                                                                                                                                                                                                                                                                                                                                                                                                                                                                                                                            |   |                      |                       |                        |                   |                                |   |                   |                  |   |                   |                    |   |                   |         |   |                   |       |   |                   |          |   |                   |                                         |   |                   |         |    |                    |                       |    |                    |                  |    |                    |                    |    |                    |                     |    |                    |             |    |                    |                   |    |                    |       |
| 16                                    | covid_symptoms__16                                                            | Other                                                                                                                                                                                                                                                               |                                                                                                                                                                                                                                                                                                                                                                                                                                                                                                                                                                                                                                                                                                                                                                                                                                                                                                                                                                                                                                                                                                                                                                                            |   |                      |                       |                        |                   |                                |   |                   |                  |   |                   |                    |   |                   |         |   |                   |       |   |                   |          |   |                   |                                         |   |                   |         |    |                    |                       |    |                    |                  |    |                    |                    |    |                    |                     |    |                    |             |    |                    |                   |    |                    |       |
| 1411                                  | covid_symptoms_other<br>Show the field ONLY if:<br>[covid_symptoms(16)] = '1' | What Other Symptoms?<br><i>Separated by commas</i>                                                                                                                                                                                                                  | notes                                                                                                                                                                                                                                                                                                                                                                                                                                                                                                                                                                                                                                                                                                                                                                                                                                                                                                                                                                                                                                                                                                                                                                                      |   |                      |                       |                        |                   |                                |   |                   |                  |   |                   |                    |   |                   |         |   |                   |       |   |                   |          |   |                   |                                         |   |                   |         |    |                    |                       |    |                    |                  |    |                    |                    |    |                    |                     |    |                    |             |    |                    |                   |    |                    |       |
| 1412                                  | covid_temp_h                                                                  | Section Header: <i>Vital Signs (Count the 24h of the collection day, from 00:00h to 23:59h)</i><br>Highest Temperature in 24h<br><i>Celsius</i>                                                                                                                     | text (number, Min: 30, Max: 45)                                                                                                                                                                                                                                                                                                                                                                                                                                                                                                                                                                                                                                                                                                                                                                                                                                                                                                                                                                                                                                                                                                                                                            |   |                      |                       |                        |                   |                                |   |                   |                  |   |                   |                    |   |                   |         |   |                   |       |   |                   |          |   |                   |                                         |   |                   |         |    |                    |                       |    |                    |                  |    |                    |                    |    |                    |                     |    |                    |             |    |                    |                   |    |                    |       |
| 1413                                  | covid_temp_l                                                                  | Lowest Temperature in 24h<br><i>Celsius</i>                                                                                                                                                                                                                         | text (number, Min: 30, Max: 45)                                                                                                                                                                                                                                                                                                                                                                                                                                                                                                                                                                                                                                                                                                                                                                                                                                                                                                                                                                                                                                                                                                                                                            |   |                      |                       |                        |                   |                                |   |                   |                  |   |                   |                    |   |                   |         |   |                   |       |   |                   |          |   |                   |                                         |   |                   |         |    |                    |                       |    |                    |                  |    |                    |                    |    |                    |                     |    |                    |             |    |                    |                   |    |                    |       |
| 1414                                  | covid_hr_h                                                                    | Highest Heart Rate in 24h<br><i>bpm</i>                                                                                                                                                                                                                             | text (number, Min: 30, Max: 300)                                                                                                                                                                                                                                                                                                                                                                                                                                                                                                                                                                                                                                                                                                                                                                                                                                                                                                                                                                                                                                                                                                                                                           |   |                      |                       |                        |                   |                                |   |                   |                  |   |                   |                    |   |                   |         |   |                   |       |   |                   |          |   |                   |                                         |   |                   |         |    |                    |                       |    |                    |                  |    |                    |                    |    |                    |                     |    |                    |             |    |                    |                   |    |                    |       |

|      |               |                                                                                                                        |                                                                                          |
|------|---------------|------------------------------------------------------------------------------------------------------------------------|------------------------------------------------------------------------------------------|
| 1415 | covid_hr_l    | Lowest Heart Rate in 24h<br><i>bpm</i>                                                                                 | text (number, Min: 30, Max: 300)                                                         |
| 1416 | covid_rr_h    | Highest Respiratory Rate in 24h<br><i>rpm</i>                                                                          | text (number, Min: 2, Max: 100)                                                          |
| 1417 | covid_rr_l    | Lowest Respiratory Rate in 24h<br><i>rpm</i>                                                                           | text (number, Min: 2, Max: 100)                                                          |
| 1418 | covid_sbp_h   | Highest Systolic Blood Pressure in 24h<br><i>mmHg</i>                                                                  | text (number, Min: 20, Max: 300)                                                         |
| 1419 | covid_sbp_l   | Lowest Systolic Blood Pressure in 24h<br><i>mmHg</i>                                                                   | text (number, Min: 20, Max: 300)                                                         |
| 1420 | covid_dbp_h   | Highest Distolic Blood Pressure in 24h<br><i>mmHg</i>                                                                  | text (number, Min: 20, Max: 300)                                                         |
| 1421 | covid_dbp_l   | Lowest Diastolic Blood Pressure in 24h<br><i>mmHg</i>                                                                  | text (number, Min: 20, Max: 300)                                                         |
| 1422 | covid_mbp_h   | Highest Mean Blood Pressure in 24h<br><i>mmHg</i>                                                                      | calc<br>Calculation: $(([\text{covid\_dbp\_h}] * 2) / 3) + ([\text{covid\_sbp\_h}] / 3)$ |
| 1423 | covid_mbp_l   | Lowest Mean Blood Pressure in 24h<br><i>mmHg</i>                                                                       | calc<br>Calculation: $(([\text{covid\_dbp\_l}] * 2) / 3) + ([\text{covid\_sbp\_l}] / 3)$ |
| 1424 | covid_hb      | Section Header: Complete Blood Count (take the closest values to the research blood draw)<br>Hemoglobin<br><i>g/dL</i> | text (number, Min: 1, Max: 50)                                                           |
| 1425 | covid_hct     | Hematocrit<br><i>Percentage (%)</i>                                                                                    | text (number, Min: 1, Max: 100)                                                          |
| 1426 | covid_wbc     | White Blood Cells<br><i>Thousand/mm3</i>                                                                               | text (number, Min: 0, Max: 500)                                                          |
| 1427 | covid_wbc_n   | Neutrophils<br><i>Percentage (%)</i>                                                                                   | text (number, Min: 0, Max: 100)                                                          |
| 1428 | covid_wbc_l   | Lymphocytes<br><i>Percentage (%)</i>                                                                                   | text (number, Min: 0, Max: 100)                                                          |
| 1429 | covid_plt     | Platelets<br><i>Thousand/mm3</i>                                                                                       | text (number, Min: 0, Max: 10000)                                                        |
| 1430 | covid_bmp_na  | Section Header: Basic Metabolic Panel (take the closest values to the research blood draw)<br>Sodium<br><i>mEq/L</i>   | text (number, Min: 100, Max: 200)                                                        |
| 1431 | covid_bmp_k   | Potassium<br><i>mEq/L</i>                                                                                              | text (number, Min: 0, Max: 10)                                                           |
| 1432 | covid_bmp_bun | BUN<br><i>mg/dL</i>                                                                                                    | text (number, Min: 0, Max: 500)                                                          |
| 1433 | covid_bmp_cr  | Creatinine<br><i>mg/dL</i>                                                                                             | text (number, Min: 0, Max: 30)                                                           |
| 1434 | covid_bmp_glc | Glucose<br><i>mg/dL</i>                                                                                                | text (number, Min: 20, Max: 2000)                                                        |
| 1435 | covid_procal  | Section Header: Other Labs (take the closest values to the research blood draw)<br>Procalcitonin<br><i>ng/mL</i>       | text (number, Min: 0, Max: 10)                                                           |
| 1436 | covid_crp     | C-Reactive Protein (CRP)<br><i>mg/dL</i>                                                                               | text (number, Min: 0, Max: 1000)                                                         |
| 1437 | covid_ddimer  | D-Dimer<br><i>ng/mL</i>                                                                                                | text (number, Min: 0, Max: 100000)                                                       |
| 1438 | covid_cpk     | Creatine Phosphokinase<br><i>U/L</i>                                                                                   | text (number, Min: 0, Max: 10000)                                                        |
| 1439 | covid_il6     | Interleukin 6 (IL-6)<br><i>pg/mL</i>                                                                                   | text (number, Min: 0, Max: 1000)                                                         |
| 1440 | covid_ferr    | Ferritin<br><i>ng/mL</i>                                                                                               | text (number, Min: 0, Max: 100000)                                                       |
| 1441 | covid_fibr    | Fibrinogen<br><i>mg/dL</i>                                                                                             | text                                                                                     |
| 1442 | covid_lfp_alb | Section Header: Liver Function Panel (take the closest values to the research blood draw)<br>Albumin<br><i>g/dL</i>    | text (number, Min: 0, Max: 50)                                                           |
| 1443 | covid_lfp_ast | Aspartate Amino-Transferase (AST)<br><i>U/L</i>                                                                        | text (number, Min: 0, Max: 10000)                                                        |
| 1444 | covid_lfp_alt | Alanine Amino-Transferase (ALT)<br><i>U/L</i>                                                                          | text (number, Min: 0, Max: 10000)                                                        |
| 1445 | covid_lfp_bil | Total Bilirubin<br><i>mg/dL</i>                                                                                        | text (number, Min: 0, Max: 100)                                                          |
| 1446 | covid_ptt     | Partial Thromboplastin Time (PTT)<br><i>Seconds</i>                                                                    | text (number, Min: 0, Max: 1000)                                                         |

|      |                                                               |                                                                                                                 |                                                                                                                                                                                                                                                                                                                                                                            |   |                                       |   |                                                        |   |                                         |   |                                      |   |       |
|------|---------------------------------------------------------------|-----------------------------------------------------------------------------------------------------------------|----------------------------------------------------------------------------------------------------------------------------------------------------------------------------------------------------------------------------------------------------------------------------------------------------------------------------------------------------------------------------|---|---------------------------------------|---|--------------------------------------------------------|---|-----------------------------------------|---|--------------------------------------|---|-------|
| 1447 | covid_inr                                                     | International Normalized Ratio (INR)                                                                            | text (number, Min: 0, Max: 20)                                                                                                                                                                                                                                                                                                                                             |   |                                       |   |                                                        |   |                                         |   |                                      |   |       |
| 1448 | covid_abg_ph                                                  | Section Header: <i>Arterial Blood Gases (take the closest values to the research blood draw)</i><br>Arterial pH | text (number, Min: 6, Max: 10)                                                                                                                                                                                                                                                                                                                                             |   |                                       |   |                                                        |   |                                         |   |                                      |   |       |
| 1449 | covid_abg_pao2                                                | PaO2<br><i>mmHg</i>                                                                                             | text (number, Min: 0, Max: 1000)                                                                                                                                                                                                                                                                                                                                           |   |                                       |   |                                                        |   |                                         |   |                                      |   |       |
| 1450 | covid_abg_paco2                                               | PaCO2<br><i>mmHg</i>                                                                                            | text (number, Min: 0, Max: 100)                                                                                                                                                                                                                                                                                                                                            |   |                                       |   |                                                        |   |                                         |   |                                      |   |       |
| 1451 | covid_abg_hco3                                                | Bicarbonate<br><i>mmol/L</i>                                                                                    | text (number, Min: 0, Max: 50)                                                                                                                                                                                                                                                                                                                                             |   |                                       |   |                                                        |   |                                         |   |                                      |   |       |
| 1452 | covid_abg_lact                                                | Lactate<br><i>mmol/L</i>                                                                                        | text (number, Min: 0, Max: 20)                                                                                                                                                                                                                                                                                                                                             |   |                                       |   |                                                        |   |                                         |   |                                      |   |       |
| 1453 | covid_mv                                                      | Section Header: <i>Ventilation and Supplemental Oxygen</i><br>Was patient intubated?                            | yesno<br><table border="1"> <tr> <td>1</td> <td>Yes</td> </tr> <tr> <td>0</td> <td>No</td> </tr> </table>                                                                                                                                                                                                                                                                  | 1 | Yes                                   | 0 | No                                                     |   |                                         |   |                                      |   |       |
| 1    | Yes                                                           |                                                                                                                 |                                                                                                                                                                                                                                                                                                                                                                            |   |                                       |   |                                                        |   |                                         |   |                                      |   |       |
| 0    | No                                                            |                                                                                                                 |                                                                                                                                                                                                                                                                                                                                                                            |   |                                       |   |                                                        |   |                                         |   |                                      |   |       |
| 1454 | covid_mv_prn                                                  | Was Patient Proned?                                                                                             | yesno<br><table border="1"> <tr> <td>1</td> <td>Yes</td> </tr> <tr> <td>0</td> <td>No</td> </tr> </table>                                                                                                                                                                                                                                                                  | 1 | Yes                                   | 0 | No                                                     |   |                                         |   |                                      |   |       |
| 1    | Yes                                                           |                                                                                                                 |                                                                                                                                                                                                                                                                                                                                                                            |   |                                       |   |                                                        |   |                                         |   |                                      |   |       |
| 0    | No                                                            |                                                                                                                 |                                                                                                                                                                                                                                                                                                                                                                            |   |                                       |   |                                                        |   |                                         |   |                                      |   |       |
| 1455 | covid_mv_date<br>Show the field ONLY if:<br>[covid_mv] = '1'  | Intubation Date                                                                                                 | text (date_mdy)                                                                                                                                                                                                                                                                                                                                                            |   |                                       |   |                                                        |   |                                         |   |                                      |   |       |
| 1456 | covid_mv_days<br>Show the field ONLY if:<br>[covid_mv] = '1'  | Days of Intubation                                                                                              | calc<br>Calculation: datediff ([covid_sample_date], [covid_mv_days], "d", "M-D-Y")                                                                                                                                                                                                                                                                                         |   |                                       |   |                                                        |   |                                         |   |                                      |   |       |
| 1457 | covid_mv_vm<br>Show the field ONLY if:<br>[covid_mv] = '1'    | Ventilator Mode                                                                                                 | radio<br><table border="1"> <tr> <td>1</td> <td>Assist-Control Ventilation (ACV)</td> </tr> <tr> <td>2</td> <td>Synchronized Intermittent-Mandatory Ventilation (SIMV)</td> </tr> <tr> <td>3</td> <td>Continuous Positive Air Pressure (CPAP)</td> </tr> <tr> <td>4</td> <td>Bilevel Positive Air Pressure (BPAP)</td> </tr> <tr> <td>5</td> <td>Other</td> </tr> </table> | 1 | Assist-Control Ventilation (ACV)      | 2 | Synchronized Intermittent-Mandatory Ventilation (SIMV) | 3 | Continuous Positive Air Pressure (CPAP) | 4 | Bilevel Positive Air Pressure (BPAP) | 5 | Other |
| 1    | Assist-Control Ventilation (ACV)                              |                                                                                                                 |                                                                                                                                                                                                                                                                                                                                                                            |   |                                       |   |                                                        |   |                                         |   |                                      |   |       |
| 2    | Synchronized Intermittent-Mandatory Ventilation (SIMV)        |                                                                                                                 |                                                                                                                                                                                                                                                                                                                                                                            |   |                                       |   |                                                        |   |                                         |   |                                      |   |       |
| 3    | Continuous Positive Air Pressure (CPAP)                       |                                                                                                                 |                                                                                                                                                                                                                                                                                                                                                                            |   |                                       |   |                                                        |   |                                         |   |                                      |   |       |
| 4    | Bilevel Positive Air Pressure (BPAP)                          |                                                                                                                 |                                                                                                                                                                                                                                                                                                                                                                            |   |                                       |   |                                                        |   |                                         |   |                                      |   |       |
| 5    | Other                                                         |                                                                                                                 |                                                                                                                                                                                                                                                                                                                                                                            |   |                                       |   |                                                        |   |                                         |   |                                      |   |       |
| 1458 | covid_mv_ms<br>Show the field ONLY if:<br>[covid_mv] = '1'    | Mandatory Setting                                                                                               | radio<br><table border="1"> <tr> <td>1</td> <td>Pressure-Controlled Ventilation (PCV)</td> </tr> <tr> <td>2</td> <td>Volume-Controlled Ventilation (VCV)</td> </tr> <tr> <td>3</td> <td>Other</td> </tr> </table>                                                                                                                                                          | 1 | Pressure-Controlled Ventilation (PCV) | 2 | Volume-Controlled Ventilation (VCV)                    | 3 | Other                                   |   |                                      |   |       |
| 1    | Pressure-Controlled Ventilation (PCV)                         |                                                                                                                 |                                                                                                                                                                                                                                                                                                                                                                            |   |                                       |   |                                                        |   |                                         |   |                                      |   |       |
| 2    | Volume-Controlled Ventilation (VCV)                           |                                                                                                                 |                                                                                                                                                                                                                                                                                                                                                                            |   |                                       |   |                                                        |   |                                         |   |                                      |   |       |
| 3    | Other                                                         |                                                                                                                 |                                                                                                                                                                                                                                                                                                                                                                            |   |                                       |   |                                                        |   |                                         |   |                                      |   |       |
| 1459 | covid_mv_tv<br>Show the field ONLY if:<br>[covid_mv] = '1'    | Tidal Volume<br><i>mL</i>                                                                                       | text (number, Min: 0, Max: 1000)                                                                                                                                                                                                                                                                                                                                           |   |                                       |   |                                                        |   |                                         |   |                                      |   |       |
| 1460 | covid_mv_fio2<br>Show the field ONLY if:<br>[covid_mv] = '1'  | FiO2<br><i>Percentage (%)</i>                                                                                   | text (number, Min: 0, Max: 100)                                                                                                                                                                                                                                                                                                                                            |   |                                       |   |                                                        |   |                                         |   |                                      |   |       |
| 1461 | covid_mv_peep<br>Show the field ONLY if:<br>[covid_mv] = '1'  | PEEP<br><i>cmH2O</i>                                                                                            | text (number, Min: 0, Max: 30)                                                                                                                                                                                                                                                                                                                                             |   |                                       |   |                                                        |   |                                         |   |                                      |   |       |
| 1462 | covid_mv_pp<br>Show the field ONLY if:<br>[covid_mv] = '1'    | Plateau Pressure<br><i>cmH2O</i>                                                                                | text (number, Min: 0, Max: 100)                                                                                                                                                                                                                                                                                                                                            |   |                                       |   |                                                        |   |                                         |   |                                      |   |       |
| 1463 | covid_mv_cstat<br>Show the field ONLY if:<br>[covid_mv] = '1' | Static Lung Compliance (CStat)<br><i>mL/cmH2O</i>                                                               | calc<br>Calculation: [covid_mv_tv]/([covid_mv_pp]-[covid_mv_peep])                                                                                                                                                                                                                                                                                                         |   |                                       |   |                                                        |   |                                         |   |                                      |   |       |
| 1464 | covid_cvp_h                                                   | Section Header: <i>Physiological Parameters</i><br>Highest CVP in 24h<br><i>cmH2O</i>                           | text                                                                                                                                                                                                                                                                                                                                                                       |   |                                       |   |                                                        |   |                                         |   |                                      |   |       |
| 1465 | covid_cvp_l                                                   | Lowest CVP in 24h<br><i>cmH2O</i>                                                                               | text                                                                                                                                                                                                                                                                                                                                                                       |   |                                       |   |                                                        |   |                                         |   |                                      |   |       |
| 1466 | covid_tivf                                                    | Total IV Fluid given in last 24h<br><i>mL</i>                                                                   | text                                                                                                                                                                                                                                                                                                                                                                       |   |                                       |   |                                                        |   |                                         |   |                                      |   |       |
| 1467 | covid_tivf_2                                                  | Total Urinary Output in Last 24h<br><i>mL</i>                                                                   | text                                                                                                                                                                                                                                                                                                                                                                       |   |                                       |   |                                                        |   |                                         |   |                                      |   |       |



|      |                                                                           |                                                                                                                                                                                                                 |                                                                                                                                                                                                                                                                                                                                                                                                                                                                                                                                                                                                                        |   |                           |                                |      |                   |                     |   |                   |                |   |               |                    |   |               |                                      |   |               |                                          |   |               |                   |
|------|---------------------------------------------------------------------------|-----------------------------------------------------------------------------------------------------------------------------------------------------------------------------------------------------------------|------------------------------------------------------------------------------------------------------------------------------------------------------------------------------------------------------------------------------------------------------------------------------------------------------------------------------------------------------------------------------------------------------------------------------------------------------------------------------------------------------------------------------------------------------------------------------------------------------------------------|---|---------------------------|--------------------------------|------|-------------------|---------------------|---|-------------------|----------------|---|---------------|--------------------|---|---------------|--------------------------------------|---|---------------|------------------------------------------|---|---------------|-------------------|
| 1468 | covid_rrt                                                                 | Renal Replacement Therapy Required? (During ICU Stay)                                                                                                                                                           | yesno<br><table border="1"> <tr> <td>1</td> <td>Yes</td> </tr> <tr> <td>0</td> <td>No</td> </tr> </table>                                                                                                                                                                                                                                                                                                                                                                                                                                                                                                              | 1 | Yes                       | 0                              | No   |                   |                     |   |                   |                |   |               |                    |   |               |                                      |   |               |                                          |   |               |                   |
| 1    | Yes                                                                       |                                                                                                                                                                                                                 |                                                                                                                                                                                                                                                                                                                                                                                                                                                                                                                                                                                                                        |   |                           |                                |      |                   |                     |   |                   |                |   |               |                    |   |               |                                      |   |               |                                          |   |               |                   |
| 0    | No                                                                        |                                                                                                                                                                                                                 |                                                                                                                                                                                                                                                                                                                                                                                                                                                                                                                                                                                                                        |   |                           |                                |      |                   |                     |   |                   |                |   |               |                    |   |               |                                      |   |               |                                          |   |               |                   |
| 1469 | covid_rrt_type<br>Show the field ONLY if: [covid_rrt] = '1'               | Type of RRT                                                                                                                                                                                                     | radio<br><table border="1"> <tr> <td>1</td> <td>Intermittent Hemodialysis</td> </tr> <tr> <td>2</td> <td>CRRT</td> </tr> <tr> <td>3</td> <td>Peritoneal dialysis</td> </tr> </table>                                                                                                                                                                                                                                                                                                                                                                                                                                   | 1 | Intermittent Hemodialysis | 2                              | CRRT | 3                 | Peritoneal dialysis |   |                   |                |   |               |                    |   |               |                                      |   |               |                                          |   |               |                   |
| 1    | Intermittent Hemodialysis                                                 |                                                                                                                                                                                                                 |                                                                                                                                                                                                                                                                                                                                                                                                                                                                                                                                                                                                                        |   |                           |                                |      |                   |                     |   |                   |                |   |               |                    |   |               |                                      |   |               |                                          |   |               |                   |
| 2    | CRRT                                                                      |                                                                                                                                                                                                                 |                                                                                                                                                                                                                                                                                                                                                                                                                                                                                                                                                                                                                        |   |                           |                                |      |                   |                     |   |                   |                |   |               |                    |   |               |                                      |   |               |                                          |   |               |                   |
| 3    | Peritoneal dialysis                                                       |                                                                                                                                                                                                                 |                                                                                                                                                                                                                                                                                                                                                                                                                                                                                                                                                                                                                        |   |                           |                                |      |                   |                     |   |                   |                |   |               |                    |   |               |                                      |   |               |                                          |   |               |                   |
| 1470 | covid_rrt_out<br>Show the field ONLY if: [covid_rrt] = '1'                | RRT Output<br><i>mL</i>                                                                                                                                                                                         | text                                                                                                                                                                                                                                                                                                                                                                                                                                                                                                                                                                                                                   |   |                           |                                |      |                   |                     |   |                   |                |   |               |                    |   |               |                                      |   |               |                                          |   |               |                   |
| 1471 | covid_rrt_days<br>Show the field ONLY if: [covid_rrt] = '1'               | Days of RRT                                                                                                                                                                                                     | text                                                                                                                                                                                                                                                                                                                                                                                                                                                                                                                                                                                                                   |   |                           |                                |      |                   |                     |   |                   |                |   |               |                    |   |               |                                      |   |               |                                          |   |               |                   |
| 1472 | covid_ua_ph                                                               | Section Header: <i>Urinalysis (take the closest values to the research blood draw)</i><br>Urinary pH                                                                                                            | text                                                                                                                                                                                                                                                                                                                                                                                                                                                                                                                                                                                                                   |   |                           |                                |      |                   |                     |   |                   |                |   |               |                    |   |               |                                      |   |               |                                          |   |               |                   |
| 1473 | covid_ua_g                                                                | Specific Gravity                                                                                                                                                                                                | text                                                                                                                                                                                                                                                                                                                                                                                                                                                                                                                                                                                                                   |   |                           |                                |      |                   |                     |   |                   |                |   |               |                    |   |               |                                      |   |               |                                          |   |               |                   |
| 1474 | covid_ua_prot                                                             | Urine Protein<br><i>mg/dL</i>                                                                                                                                                                                   | text                                                                                                                                                                                                                                                                                                                                                                                                                                                                                                                                                                                                                   |   |                           |                                |      |                   |                     |   |                   |                |   |               |                    |   |               |                                      |   |               |                                          |   |               |                   |
| 1475 | covid_ua_na                                                               | Urine Sodium<br><i>mEq/L</i>                                                                                                                                                                                    | text                                                                                                                                                                                                                                                                                                                                                                                                                                                                                                                                                                                                                   |   |                           |                                |      |                   |                     |   |                   |                |   |               |                    |   |               |                                      |   |               |                                          |   |               |                   |
| 1476 | covid_ua_cr                                                               | Urine Creatinine<br><i>mg/dL</i>                                                                                                                                                                                | text                                                                                                                                                                                                                                                                                                                                                                                                                                                                                                                                                                                                                   |   |                           |                                |      |                   |                     |   |                   |                |   |               |                    |   |               |                                      |   |               |                                          |   |               |                   |
| 1477 | covid_ua_sed                                                              | Urine Sediment?                                                                                                                                                                                                 | yesno<br><table border="1"> <tr> <td>1</td> <td>Yes</td> </tr> <tr> <td>0</td> <td>No</td> </tr> </table>                                                                                                                                                                                                                                                                                                                                                                                                                                                                                                              | 1 | Yes                       | 0                              | No   |                   |                     |   |                   |                |   |               |                    |   |               |                                      |   |               |                                          |   |               |                   |
| 1    | Yes                                                                       |                                                                                                                                                                                                                 |                                                                                                                                                                                                                                                                                                                                                                                                                                                                                                                                                                                                                        |   |                           |                                |      |                   |                     |   |                   |                |   |               |                    |   |               |                                      |   |               |                                          |   |               |                   |
| 0    | No                                                                        |                                                                                                                                                                                                                 |                                                                                                                                                                                                                                                                                                                                                                                                                                                                                                                                                                                                                        |   |                           |                                |      |                   |                     |   |                   |                |   |               |                    |   |               |                                      |   |               |                                          |   |               |                   |
| 1478 | covid_ua_sed_type                                                         | Type of Urine Sediment                                                                                                                                                                                          | text                                                                                                                                                                                                                                                                                                                                                                                                                                                                                                                                                                                                                   |   |                           |                                |      |                   |                     |   |                   |                |   |               |                    |   |               |                                      |   |               |                                          |   |               |                   |
| 1479 | covid_ua_fena                                                             | Section Header: <i>Renal Function</i><br>Fractional Excretion of Sodium (FENA)<br><i>Percentage (%)</i>                                                                                                         | calc<br>Calculation: $(([\text{covid\_bmp\_cr}] * [\text{covid\_ua\_na}] / ([\text{covid\_bmp\_na}] * [\text{covid\_ua\_cr}])) * 100$                                                                                                                                                                                                                                                                                                                                                                                                                                                                                  |   |                           |                                |      |                   |                     |   |                   |                |   |               |                    |   |               |                                      |   |               |                                          |   |               |                   |
| 1480 | covid_gfr                                                                 | Glomerular Filtration Rate (CKD-EPI)<br><i>mL/min/1.73m<sup>2</sup></i>                                                                                                                                         | calc<br>Calculation: $\text{round}(\text{if}([\text{gender}] = '1', (141 * ([\text{covid\_bmp\_cr}] / 0.9)^{\text{if}([\text{covid\_bmp\_cr}] \leq 0.9, -0.411, -1.209)} * (0.993)^{([\text{age\_2}] * \text{if}([\text{race}] = '2', 1.159, 1)), \text{if}([\text{gender}] = '2', (144 * ([\text{covid\_bmp\_cr}] / 0.7)^{\text{if}([\text{covid\_bmp\_cr}] \leq 0.7, -0.329, -1.209)} * (0.993)^{([\text{age\_2}] * \text{if}([\text{race}] = '2', 1.159, 1)), ""))), 1)$                                                                                                                                            |   |                           |                                |      |                   |                     |   |                   |                |   |               |                    |   |               |                                      |   |               |                                          |   |               |                   |
| 1481 | covid_bun_cr_ratio                                                        | BUN/Creatinine Ratio                                                                                                                                                                                            | calc<br>Calculation: $[\text{covid\_bmp\_bun}] / [\text{covid\_bmp\_cr}]$                                                                                                                                                                                                                                                                                                                                                                                                                                                                                                                                              |   |                           |                                |      |                   |                     |   |                   |                |   |               |                    |   |               |                                      |   |               |                                          |   |               |                   |
| 1482 | covid_vasop                                                               | Section Header: <i>Vasopressors/Inotropics (on the day of specimen collection)</i><br>Any Vasopressors/Inotropics?                                                                                              | yesno<br><table border="1"> <tr> <td>1</td> <td>Yes</td> </tr> <tr> <td>0</td> <td>No</td> </tr> </table>                                                                                                                                                                                                                                                                                                                                                                                                                                                                                                              | 1 | Yes                       | 0                              | No   |                   |                     |   |                   |                |   |               |                    |   |               |                                      |   |               |                                          |   |               |                   |
| 1    | Yes                                                                       |                                                                                                                                                                                                                 |                                                                                                                                                                                                                                                                                                                                                                                                                                                                                                                                                                                                                        |   |                           |                                |      |                   |                     |   |                   |                |   |               |                    |   |               |                                      |   |               |                                          |   |               |                   |
| 0    | No                                                                        |                                                                                                                                                                                                                 |                                                                                                                                                                                                                                                                                                                                                                                                                                                                                                                                                                                                                        |   |                           |                                |      |                   |                     |   |                   |                |   |               |                    |   |               |                                      |   |               |                                          |   |               |                   |
| 1483 | covid_vasop_n<br>Show the field ONLY if: [covid_vasop] = '1'              | Number of Vasopressors/Inotropics                                                                                                                                                                               | text                                                                                                                                                                                                                                                                                                                                                                                                                                                                                                                                                                                                                   |   |                           |                                |      |                   |                     |   |                   |                |   |               |                    |   |               |                                      |   |               |                                          |   |               |                   |
| 1484 | covid_meds                                                                | Section Header: <i>Medications and Interventions received during ICU-as treatment for COVID-19 and associated complications.</i><br>Medications received during the ICU admission as part of COVID-19 treatment | checkbox<br><table border="1"> <tr> <td>1</td> <td>covid_meds__1</td> <td>Antihypertensives (ARB, ACE-I)</td> </tr> <tr> <td>2</td> <td>covid_meds__2</td> <td>Anticoagulation</td> </tr> <tr> <td>3</td> <td>covid_meds__3</td> <td>Antimicrobials</td> </tr> <tr> <td>4</td> <td>covid_meds__4</td> <td>Convalescent Serum</td> </tr> <tr> <td>5</td> <td>covid_meds__5</td> <td>Immunomodulators &amp; Anti-inflammatory</td> </tr> <tr> <td>6</td> <td>covid_meds__6</td> <td>Systemic tPA (not for catheter infusion)</td> </tr> <tr> <td>7</td> <td>covid_meds__7</td> <td>None of the above</td> </tr> </table> | 1 | covid_meds__1             | Antihypertensives (ARB, ACE-I) | 2    | covid_meds__2     | Anticoagulation     | 3 | covid_meds__3     | Antimicrobials | 4 | covid_meds__4 | Convalescent Serum | 5 | covid_meds__5 | Immunomodulators & Anti-inflammatory | 6 | covid_meds__6 | Systemic tPA (not for catheter infusion) | 7 | covid_meds__7 | None of the above |
| 1    | covid_meds__1                                                             | Antihypertensives (ARB, ACE-I)                                                                                                                                                                                  |                                                                                                                                                                                                                                                                                                                                                                                                                                                                                                                                                                                                                        |   |                           |                                |      |                   |                     |   |                   |                |   |               |                    |   |               |                                      |   |               |                                          |   |               |                   |
| 2    | covid_meds__2                                                             | Anticoagulation                                                                                                                                                                                                 |                                                                                                                                                                                                                                                                                                                                                                                                                                                                                                                                                                                                                        |   |                           |                                |      |                   |                     |   |                   |                |   |               |                    |   |               |                                      |   |               |                                          |   |               |                   |
| 3    | covid_meds__3                                                             | Antimicrobials                                                                                                                                                                                                  |                                                                                                                                                                                                                                                                                                                                                                                                                                                                                                                                                                                                                        |   |                           |                                |      |                   |                     |   |                   |                |   |               |                    |   |               |                                      |   |               |                                          |   |               |                   |
| 4    | covid_meds__4                                                             | Convalescent Serum                                                                                                                                                                                              |                                                                                                                                                                                                                                                                                                                                                                                                                                                                                                                                                                                                                        |   |                           |                                |      |                   |                     |   |                   |                |   |               |                    |   |               |                                      |   |               |                                          |   |               |                   |
| 5    | covid_meds__5                                                             | Immunomodulators & Anti-inflammatory                                                                                                                                                                            |                                                                                                                                                                                                                                                                                                                                                                                                                                                                                                                                                                                                                        |   |                           |                                |      |                   |                     |   |                   |                |   |               |                    |   |               |                                      |   |               |                                          |   |               |                   |
| 6    | covid_meds__6                                                             | Systemic tPA (not for catheter infusion)                                                                                                                                                                        |                                                                                                                                                                                                                                                                                                                                                                                                                                                                                                                                                                                                                        |   |                           |                                |      |                   |                     |   |                   |                |   |               |                    |   |               |                                      |   |               |                                          |   |               |                   |
| 7    | covid_meds__7                                                             | None of the above                                                                                                                                                                                               |                                                                                                                                                                                                                                                                                                                                                                                                                                                                                                                                                                                                                        |   |                           |                                |      |                   |                     |   |                   |                |   |               |                    |   |               |                                      |   |               |                                          |   |               |                   |
| 1485 | covid_meds_ahs<br>Show the field ONLY if: [covid_meds(1)] = '1'           | Antihypertensives as part of COVID-19 Treatment                                                                                                                                                                 | checkbox<br><table border="1"> <tr> <td>1</td> <td>covid_meds_ahs__1</td> <td>ACE-Is</td> </tr> <tr> <td>2</td> <td>covid_meds_ahs__2</td> <td>ARBs</td> </tr> <tr> <td>3</td> <td>covid_meds_ahs__3</td> <td>Other</td> </tr> </table>                                                                                                                                                                                                                                                                                                                                                                                | 1 | covid_meds_ahs__1         | ACE-Is                         | 2    | covid_meds_ahs__2 | ARBs                | 3 | covid_meds_ahs__3 | Other          |   |               |                    |   |               |                                      |   |               |                                          |   |               |                   |
| 1    | covid_meds_ahs__1                                                         | ACE-Is                                                                                                                                                                                                          |                                                                                                                                                                                                                                                                                                                                                                                                                                                                                                                                                                                                                        |   |                           |                                |      |                   |                     |   |                   |                |   |               |                    |   |               |                                      |   |               |                                          |   |               |                   |
| 2    | covid_meds_ahs__2                                                         | ARBs                                                                                                                                                                                                            |                                                                                                                                                                                                                                                                                                                                                                                                                                                                                                                                                                                                                        |   |                           |                                |      |                   |                     |   |                   |                |   |               |                    |   |               |                                      |   |               |                                          |   |               |                   |
| 3    | covid_meds_ahs__3                                                         | Other                                                                                                                                                                                                           |                                                                                                                                                                                                                                                                                                                                                                                                                                                                                                                                                                                                                        |   |                           |                                |      |                   |                     |   |                   |                |   |               |                    |   |               |                                      |   |               |                                          |   |               |                   |
| 1486 | covid_meds_ahs_other<br>Show the field ONLY if: [covid_meds_ahs(3)] = '1' | Which other hypertensive was used as part of COVID-19 treatment                                                                                                                                                 | text                                                                                                                                                                                                                                                                                                                                                                                                                                                                                                                                                                                                                   |   |                           |                                |      |                   |                     |   |                   |                |   |               |                    |   |               |                                      |   |               |                                          |   |               |                   |

|      |                                                                                     |                                                                                            |                                                                                                                                                                                                                                                                                                                                                                                                                                                                                                                                                                                                                                                                              |   |                         |                      |                                     |                    |                           |   |                                        |                                                                   |                                          |                    |                                                           |   |                    |            |   |                    |           |   |                    |             |   |                    |           |   |                    |       |
|------|-------------------------------------------------------------------------------------|--------------------------------------------------------------------------------------------|------------------------------------------------------------------------------------------------------------------------------------------------------------------------------------------------------------------------------------------------------------------------------------------------------------------------------------------------------------------------------------------------------------------------------------------------------------------------------------------------------------------------------------------------------------------------------------------------------------------------------------------------------------------------------|---|-------------------------|----------------------|-------------------------------------|--------------------|---------------------------|---|----------------------------------------|-------------------------------------------------------------------|------------------------------------------|--------------------|-----------------------------------------------------------|---|--------------------|------------|---|--------------------|-----------|---|--------------------|-------------|---|--------------------|-----------|---|--------------------|-------|
| 1487 | covid_meds_acm<br>Show the field ONLY if:<br>[covid_meds(2)] = '1'                  | Anticoagulation Type (do not include prophylaxis)                                          | checkbox<br><table border="1"> <tr> <td>1</td> <td>covid_meds_acm__1</td> <td>Coumarins (Warfarin)</td> </tr> <tr> <td>2</td> <td>covid_meds_acm__2</td> <td>Heparins (UFH, LMWH, etc)</td> </tr> <tr> <td>3</td> <td>covid_meds_acm__3</td> <td>Direct Factor Xa Inhibitors (Apixaban, Rivaroxaban, Fondaparinux)</td> </tr> <tr> <td>4</td> <td>covid_meds_acm__4</td> <td>Thrombin Inhibitors (Argatroban, Bivalirudin, Dabigatran)</td> </tr> <tr> <td>5</td> <td>covid_meds_acm__5</td> <td>Other</td> </tr> </table>                                                                                                                                                   | 1 | covid_meds_acm__1       | Coumarins (Warfarin) | 2                                   | covid_meds_acm__2  | Heparins (UFH, LMWH, etc) | 3 | covid_meds_acm__3                      | Direct Factor Xa Inhibitors (Apixaban, Rivaroxaban, Fondaparinux) | 4                                        | covid_meds_acm__4  | Thrombin Inhibitors (Argatroban, Bivalirudin, Dabigatran) | 5 | covid_meds_acm__5  | Other      |   |                    |           |   |                    |             |   |                    |           |   |                    |       |
| 1    | covid_meds_acm__1                                                                   | Coumarins (Warfarin)                                                                       |                                                                                                                                                                                                                                                                                                                                                                                                                                                                                                                                                                                                                                                                              |   |                         |                      |                                     |                    |                           |   |                                        |                                                                   |                                          |                    |                                                           |   |                    |            |   |                    |           |   |                    |             |   |                    |           |   |                    |       |
| 2    | covid_meds_acm__2                                                                   | Heparins (UFH, LMWH, etc)                                                                  |                                                                                                                                                                                                                                                                                                                                                                                                                                                                                                                                                                                                                                                                              |   |                         |                      |                                     |                    |                           |   |                                        |                                                                   |                                          |                    |                                                           |   |                    |            |   |                    |           |   |                    |             |   |                    |           |   |                    |       |
| 3    | covid_meds_acm__3                                                                   | Direct Factor Xa Inhibitors (Apixaban, Rivaroxaban, Fondaparinux)                          |                                                                                                                                                                                                                                                                                                                                                                                                                                                                                                                                                                                                                                                                              |   |                         |                      |                                     |                    |                           |   |                                        |                                                                   |                                          |                    |                                                           |   |                    |            |   |                    |           |   |                    |             |   |                    |           |   |                    |       |
| 4    | covid_meds_acm__4                                                                   | Thrombin Inhibitors (Argatroban, Bivalirudin, Dabigatran)                                  |                                                                                                                                                                                                                                                                                                                                                                                                                                                                                                                                                                                                                                                                              |   |                         |                      |                                     |                    |                           |   |                                        |                                                                   |                                          |                    |                                                           |   |                    |            |   |                    |           |   |                    |             |   |                    |           |   |                    |       |
| 5    | covid_meds_acm__5                                                                   | Other                                                                                      |                                                                                                                                                                                                                                                                                                                                                                                                                                                                                                                                                                                                                                                                              |   |                         |                      |                                     |                    |                           |   |                                        |                                                                   |                                          |                    |                                                           |   |                    |            |   |                    |           |   |                    |             |   |                    |           |   |                    |       |
| 1488 | covid_meds_acm_reason<br>Show the field ONLY if:<br>[covid_meds(2)] = '1'           | Anticoagulation Reason                                                                     | radio<br><table border="1"> <tr> <td>1</td> <td>Acute Coronary Syndrome</td> </tr> <tr> <td>2</td> <td>Cardiac Arrhythmias (AFib, Flutter)</td> </tr> <tr> <td>3</td> <td>DVT/PE</td> </tr> <tr> <td>4</td> <td>For Extracorporeal Circuit (ECMO, RRT)</td> </tr> <tr> <td>5</td> <td>Hypercoagulable State (COVID-Associated)</td> </tr> <tr> <td>6</td> <td>Other</td> </tr> </table>                                                                                                                                                                                                                                                                                      | 1 | Acute Coronary Syndrome | 2                    | Cardiac Arrhythmias (AFib, Flutter) | 3                  | DVT/PE                    | 4 | For Extracorporeal Circuit (ECMO, RRT) | 5                                                                 | Hypercoagulable State (COVID-Associated) | 6                  | Other                                                     |   |                    |            |   |                    |           |   |                    |             |   |                    |           |   |                    |       |
| 1    | Acute Coronary Syndrome                                                             |                                                                                            |                                                                                                                                                                                                                                                                                                                                                                                                                                                                                                                                                                                                                                                                              |   |                         |                      |                                     |                    |                           |   |                                        |                                                                   |                                          |                    |                                                           |   |                    |            |   |                    |           |   |                    |             |   |                    |           |   |                    |       |
| 2    | Cardiac Arrhythmias (AFib, Flutter)                                                 |                                                                                            |                                                                                                                                                                                                                                                                                                                                                                                                                                                                                                                                                                                                                                                                              |   |                         |                      |                                     |                    |                           |   |                                        |                                                                   |                                          |                    |                                                           |   |                    |            |   |                    |           |   |                    |             |   |                    |           |   |                    |       |
| 3    | DVT/PE                                                                              |                                                                                            |                                                                                                                                                                                                                                                                                                                                                                                                                                                                                                                                                                                                                                                                              |   |                         |                      |                                     |                    |                           |   |                                        |                                                                   |                                          |                    |                                                           |   |                    |            |   |                    |           |   |                    |             |   |                    |           |   |                    |       |
| 4    | For Extracorporeal Circuit (ECMO, RRT)                                              |                                                                                            |                                                                                                                                                                                                                                                                                                                                                                                                                                                                                                                                                                                                                                                                              |   |                         |                      |                                     |                    |                           |   |                                        |                                                                   |                                          |                    |                                                           |   |                    |            |   |                    |           |   |                    |             |   |                    |           |   |                    |       |
| 5    | Hypercoagulable State (COVID-Associated)                                            |                                                                                            |                                                                                                                                                                                                                                                                                                                                                                                                                                                                                                                                                                                                                                                                              |   |                         |                      |                                     |                    |                           |   |                                        |                                                                   |                                          |                    |                                                           |   |                    |            |   |                    |           |   |                    |             |   |                    |           |   |                    |       |
| 6    | Other                                                                               |                                                                                            |                                                                                                                                                                                                                                                                                                                                                                                                                                                                                                                                                                                                                                                                              |   |                         |                      |                                     |                    |                           |   |                                        |                                                                   |                                          |                    |                                                           |   |                    |            |   |                    |           |   |                    |             |   |                    |           |   |                    |       |
| 1489 | covid_meds_acm_reason_o<br>Show the field ONLY if:<br>[covid_meds_acm_reason] = '6' | What Other Anticoagulation Reason?                                                         | text                                                                                                                                                                                                                                                                                                                                                                                                                                                                                                                                                                                                                                                                         |   |                         |                      |                                     |                    |                           |   |                                        |                                                                   |                                          |                    |                                                           |   |                    |            |   |                    |           |   |                    |             |   |                    |           |   |                    |       |
| 1490 | covid_meds_acm_ht<br>Show the field ONLY if:<br>[covid_meds_acm(2)] = '1'           | Type of Heparin?                                                                           | radio<br><table border="1"> <tr> <td>1</td> <td>Enoxaparin</td> </tr> <tr> <td>2</td> <td>Unfractionated Heparin (UFH)</td> </tr> <tr> <td>3</td> <td>Other</td> </tr> </table>                                                                                                                                                                                                                                                                                                                                                                                                                                                                                              | 1 | Enoxaparin              | 2                    | Unfractionated Heparin (UFH)        | 3                  | Other                     |   |                                        |                                                                   |                                          |                    |                                                           |   |                    |            |   |                    |           |   |                    |             |   |                    |           |   |                    |       |
| 1    | Enoxaparin                                                                          |                                                                                            |                                                                                                                                                                                                                                                                                                                                                                                                                                                                                                                                                                                                                                                                              |   |                         |                      |                                     |                    |                           |   |                                        |                                                                   |                                          |                    |                                                           |   |                    |            |   |                    |           |   |                    |             |   |                    |           |   |                    |       |
| 2    | Unfractionated Heparin (UFH)                                                        |                                                                                            |                                                                                                                                                                                                                                                                                                                                                                                                                                                                                                                                                                                                                                                                              |   |                         |                      |                                     |                    |                           |   |                                        |                                                                   |                                          |                    |                                                           |   |                    |            |   |                    |           |   |                    |             |   |                    |           |   |                    |       |
| 3    | Other                                                                               |                                                                                            |                                                                                                                                                                                                                                                                                                                                                                                                                                                                                                                                                                                                                                                                              |   |                         |                      |                                     |                    |                           |   |                                        |                                                                   |                                          |                    |                                                           |   |                    |            |   |                    |           |   |                    |             |   |                    |           |   |                    |       |
| 1491 | covid_meds_acm_other<br>Show the field ONLY if:<br>[covid_meds(2)] = '1'            | Which Other Anticoagulation Type?                                                          | text                                                                                                                                                                                                                                                                                                                                                                                                                                                                                                                                                                                                                                                                         |   |                         |                      |                                     |                    |                           |   |                                        |                                                                   |                                          |                    |                                                           |   |                    |            |   |                    |           |   |                    |             |   |                    |           |   |                    |       |
| 1492 | covid_meds_abx<br>Show the field ONLY if:<br>[covid_meds(3)] = '1'                  | Antimicrobials (do not include those indicated for superimposed or concomitant infections) | checkbox<br><table border="1"> <tr> <td>1</td> <td>covid_meds_abx__1</td> <td>Azithromycin</td> </tr> <tr> <td>2</td> <td>covid_meds_abx__2</td> <td>Chloroquine</td> </tr> <tr> <td>3</td> <td>covid_meds_abx__3</td> <td>Hydroxychloroquine</td> </tr> <tr> <td>4</td> <td>covid_meds_abx__4</td> <td>Lopinavir/Ritonavir (Kaletra)</td> </tr> <tr> <td>5</td> <td>covid_meds_abx__5</td> <td>Remdesivir</td> </tr> <tr> <td>6</td> <td>covid_meds_abx__6</td> <td>Ribavirin</td> </tr> <tr> <td>7</td> <td>covid_meds_abx__7</td> <td>Other</td> </tr> </table>                                                                                                           | 1 | covid_meds_abx__1       | Azithromycin         | 2                                   | covid_meds_abx__2  | Chloroquine               | 3 | covid_meds_abx__3                      | Hydroxychloroquine                                                | 4                                        | covid_meds_abx__4  | Lopinavir/Ritonavir (Kaletra)                             | 5 | covid_meds_abx__5  | Remdesivir | 6 | covid_meds_abx__6  | Ribavirin | 7 | covid_meds_abx__7  | Other       |   |                    |           |   |                    |       |
| 1    | covid_meds_abx__1                                                                   | Azithromycin                                                                               |                                                                                                                                                                                                                                                                                                                                                                                                                                                                                                                                                                                                                                                                              |   |                         |                      |                                     |                    |                           |   |                                        |                                                                   |                                          |                    |                                                           |   |                    |            |   |                    |           |   |                    |             |   |                    |           |   |                    |       |
| 2    | covid_meds_abx__2                                                                   | Chloroquine                                                                                |                                                                                                                                                                                                                                                                                                                                                                                                                                                                                                                                                                                                                                                                              |   |                         |                      |                                     |                    |                           |   |                                        |                                                                   |                                          |                    |                                                           |   |                    |            |   |                    |           |   |                    |             |   |                    |           |   |                    |       |
| 3    | covid_meds_abx__3                                                                   | Hydroxychloroquine                                                                         |                                                                                                                                                                                                                                                                                                                                                                                                                                                                                                                                                                                                                                                                              |   |                         |                      |                                     |                    |                           |   |                                        |                                                                   |                                          |                    |                                                           |   |                    |            |   |                    |           |   |                    |             |   |                    |           |   |                    |       |
| 4    | covid_meds_abx__4                                                                   | Lopinavir/Ritonavir (Kaletra)                                                              |                                                                                                                                                                                                                                                                                                                                                                                                                                                                                                                                                                                                                                                                              |   |                         |                      |                                     |                    |                           |   |                                        |                                                                   |                                          |                    |                                                           |   |                    |            |   |                    |           |   |                    |             |   |                    |           |   |                    |       |
| 5    | covid_meds_abx__5                                                                   | Remdesivir                                                                                 |                                                                                                                                                                                                                                                                                                                                                                                                                                                                                                                                                                                                                                                                              |   |                         |                      |                                     |                    |                           |   |                                        |                                                                   |                                          |                    |                                                           |   |                    |            |   |                    |           |   |                    |             |   |                    |           |   |                    |       |
| 6    | covid_meds_abx__6                                                                   | Ribavirin                                                                                  |                                                                                                                                                                                                                                                                                                                                                                                                                                                                                                                                                                                                                                                                              |   |                         |                      |                                     |                    |                           |   |                                        |                                                                   |                                          |                    |                                                           |   |                    |            |   |                    |           |   |                    |             |   |                    |           |   |                    |       |
| 7    | covid_meds_abx__7                                                                   | Other                                                                                      |                                                                                                                                                                                                                                                                                                                                                                                                                                                                                                                                                                                                                                                                              |   |                         |                      |                                     |                    |                           |   |                                        |                                                                   |                                          |                    |                                                           |   |                    |            |   |                    |           |   |                    |             |   |                    |           |   |                    |       |
| 1493 | covid_meds_abx_other<br>Show the field ONLY if:<br>[covid_meds_abx(7)] = '1'        | Which other antimicrobial(s)?                                                              | text                                                                                                                                                                                                                                                                                                                                                                                                                                                                                                                                                                                                                                                                         |   |                         |                      |                                     |                    |                           |   |                                        |                                                                   |                                          |                    |                                                           |   |                    |            |   |                    |           |   |                    |             |   |                    |           |   |                    |       |
| 1494 | covid_meds_imms<br>Show the field ONLY if:<br>[covid_meds(5)] = '1'                 | Immunomodulators and Anti-Inflammatories                                                   | checkbox<br><table border="1"> <tr> <td>1</td> <td>covid_meds_imms__1</td> <td>Aspirin</td> </tr> <tr> <td>2</td> <td>covid_meds_imms__2</td> <td>Corticosteroids</td> </tr> <tr> <td>3</td> <td>covid_meds_imms__3</td> <td>IVIG</td> </tr> <tr> <td>4</td> <td>covid_meds_imms__4</td> <td>NSAIDs</td> </tr> <tr> <td>5</td> <td>covid_meds_imms__5</td> <td>Sarilumab</td> </tr> <tr> <td>6</td> <td>covid_meds_imms__6</td> <td>Statins</td> </tr> <tr> <td>7</td> <td>covid_meds_imms__7</td> <td>Tocilizumab</td> </tr> <tr> <td>8</td> <td>covid_meds_imms__8</td> <td>Vitamin C</td> </tr> <tr> <td>9</td> <td>covid_meds_imms__9</td> <td>Other</td> </tr> </table> | 1 | covid_meds_imms__1      | Aspirin              | 2                                   | covid_meds_imms__2 | Corticosteroids           | 3 | covid_meds_imms__3                     | IVIG                                                              | 4                                        | covid_meds_imms__4 | NSAIDs                                                    | 5 | covid_meds_imms__5 | Sarilumab  | 6 | covid_meds_imms__6 | Statins   | 7 | covid_meds_imms__7 | Tocilizumab | 8 | covid_meds_imms__8 | Vitamin C | 9 | covid_meds_imms__9 | Other |
| 1    | covid_meds_imms__1                                                                  | Aspirin                                                                                    |                                                                                                                                                                                                                                                                                                                                                                                                                                                                                                                                                                                                                                                                              |   |                         |                      |                                     |                    |                           |   |                                        |                                                                   |                                          |                    |                                                           |   |                    |            |   |                    |           |   |                    |             |   |                    |           |   |                    |       |
| 2    | covid_meds_imms__2                                                                  | Corticosteroids                                                                            |                                                                                                                                                                                                                                                                                                                                                                                                                                                                                                                                                                                                                                                                              |   |                         |                      |                                     |                    |                           |   |                                        |                                                                   |                                          |                    |                                                           |   |                    |            |   |                    |           |   |                    |             |   |                    |           |   |                    |       |
| 3    | covid_meds_imms__3                                                                  | IVIG                                                                                       |                                                                                                                                                                                                                                                                                                                                                                                                                                                                                                                                                                                                                                                                              |   |                         |                      |                                     |                    |                           |   |                                        |                                                                   |                                          |                    |                                                           |   |                    |            |   |                    |           |   |                    |             |   |                    |           |   |                    |       |
| 4    | covid_meds_imms__4                                                                  | NSAIDs                                                                                     |                                                                                                                                                                                                                                                                                                                                                                                                                                                                                                                                                                                                                                                                              |   |                         |                      |                                     |                    |                           |   |                                        |                                                                   |                                          |                    |                                                           |   |                    |            |   |                    |           |   |                    |             |   |                    |           |   |                    |       |
| 5    | covid_meds_imms__5                                                                  | Sarilumab                                                                                  |                                                                                                                                                                                                                                                                                                                                                                                                                                                                                                                                                                                                                                                                              |   |                         |                      |                                     |                    |                           |   |                                        |                                                                   |                                          |                    |                                                           |   |                    |            |   |                    |           |   |                    |             |   |                    |           |   |                    |       |
| 6    | covid_meds_imms__6                                                                  | Statins                                                                                    |                                                                                                                                                                                                                                                                                                                                                                                                                                                                                                                                                                                                                                                                              |   |                         |                      |                                     |                    |                           |   |                                        |                                                                   |                                          |                    |                                                           |   |                    |            |   |                    |           |   |                    |             |   |                    |           |   |                    |       |
| 7    | covid_meds_imms__7                                                                  | Tocilizumab                                                                                |                                                                                                                                                                                                                                                                                                                                                                                                                                                                                                                                                                                                                                                                              |   |                         |                      |                                     |                    |                           |   |                                        |                                                                   |                                          |                    |                                                           |   |                    |            |   |                    |           |   |                    |             |   |                    |           |   |                    |       |
| 8    | covid_meds_imms__8                                                                  | Vitamin C                                                                                  |                                                                                                                                                                                                                                                                                                                                                                                                                                                                                                                                                                                                                                                                              |   |                         |                      |                                     |                    |                           |   |                                        |                                                                   |                                          |                    |                                                           |   |                    |            |   |                    |           |   |                    |             |   |                    |           |   |                    |       |
| 9    | covid_meds_imms__9                                                                  | Other                                                                                      |                                                                                                                                                                                                                                                                                                                                                                                                                                                                                                                                                                                                                                                                              |   |                         |                      |                                     |                    |                           |   |                                        |                                                                   |                                          |                    |                                                           |   |                    |            |   |                    |           |   |                    |             |   |                    |           |   |                    |       |
| 1495 | covid_meds_imms_other<br>Show the field ONLY if:<br>[covid_meds_imms(9)] = '1'      | Which Other Immunomodulator and/or Anti-Inflammatory?                                      | text                                                                                                                                                                                                                                                                                                                                                                                                                                                                                                                                                                                                                                                                         |   |                         |                      |                                     |                    |                           |   |                                        |                                                                   |                                          |                    |                                                           |   |                    |            |   |                    |           |   |                    |             |   |                    |           |   |                    |       |

|          |                                                               |                                                 |                                                                                                                                                                                                                                                                                                                                                                                                                                                       |          |  |   |                                         |   |                                               |   |                                                               |   |                              |   |                                      |
|----------|---------------------------------------------------------------|-------------------------------------------------|-------------------------------------------------------------------------------------------------------------------------------------------------------------------------------------------------------------------------------------------------------------------------------------------------------------------------------------------------------------------------------------------------------------------------------------------------------|----------|--|---|-----------------------------------------|---|-----------------------------------------------|---|---------------------------------------------------------------|---|------------------------------|---|--------------------------------------|
| 1496     | covid_ards_intv                                               | Specific ARDS Interventions                     | <table border="1"> <tr> <td colspan="2">checkbox</td> </tr> <tr> <td>1</td> <td>covid_ards_intv__1 Inhaled Epoprostenol</td> </tr> <tr> <td>2</td> <td>covid_ards_intv__2 Inhaled Nitric Oxide (iNO)</td> </tr> <tr> <td>3</td> <td>covid_ards_intv__3 Neuromuscular Blockade (beyond Intubation)</td> </tr> <tr> <td>4</td> <td>covid_ards_intv__4 Pronation</td> </tr> <tr> <td>5</td> <td>covid_ards_intv__5 None of the above</td> </tr> </table> | checkbox |  | 1 | covid_ards_intv__1 Inhaled Epoprostenol | 2 | covid_ards_intv__2 Inhaled Nitric Oxide (iNO) | 3 | covid_ards_intv__3 Neuromuscular Blockade (beyond Intubation) | 4 | covid_ards_intv__4 Pronation | 5 | covid_ards_intv__5 None of the above |
| checkbox |                                                               |                                                 |                                                                                                                                                                                                                                                                                                                                                                                                                                                       |          |  |   |                                         |   |                                               |   |                                                               |   |                              |   |                                      |
| 1        | covid_ards_intv__1 Inhaled Epoprostenol                       |                                                 |                                                                                                                                                                                                                                                                                                                                                                                                                                                       |          |  |   |                                         |   |                                               |   |                                                               |   |                              |   |                                      |
| 2        | covid_ards_intv__2 Inhaled Nitric Oxide (iNO)                 |                                                 |                                                                                                                                                                                                                                                                                                                                                                                                                                                       |          |  |   |                                         |   |                                               |   |                                                               |   |                              |   |                                      |
| 3        | covid_ards_intv__3 Neuromuscular Blockade (beyond Intubation) |                                                 |                                                                                                                                                                                                                                                                                                                                                                                                                                                       |          |  |   |                                         |   |                                               |   |                                                               |   |                              |   |                                      |
| 4        | covid_ards_intv__4 Pronation                                  |                                                 |                                                                                                                                                                                                                                                                                                                                                                                                                                                       |          |  |   |                                         |   |                                               |   |                                                               |   |                              |   |                                      |
| 5        | covid_ards_intv__5 None of the above                          |                                                 |                                                                                                                                                                                                                                                                                                                                                                                                                                                       |          |  |   |                                         |   |                                               |   |                                                               |   |                              |   |                                      |
| 1497     | covid19_complete                                              | Section Header: <i>Form Status</i><br>Complete? | <table border="1"> <tr> <td colspan="2">dropdown</td> </tr> <tr> <td>0</td> <td>Incomplete</td> </tr> <tr> <td>1</td> <td>Unverified</td> </tr> <tr> <td>2</td> <td>Complete</td> </tr> </table>                                                                                                                                                                                                                                                      | dropdown |  | 0 | Incomplete                              | 1 | Unverified                                    | 2 | Complete                                                      |   |                              |   |                                      |
| dropdown |                                                               |                                                 |                                                                                                                                                                                                                                                                                                                                                                                                                                                       |          |  |   |                                         |   |                                               |   |                                                               |   |                              |   |                                      |
| 0        | Incomplete                                                    |                                                 |                                                                                                                                                                                                                                                                                                                                                                                                                                                       |          |  |   |                                         |   |                                               |   |                                                               |   |                              |   |                                      |
| 1        | Unverified                                                    |                                                 |                                                                                                                                                                                                                                                                                                                                                                                                                                                       |          |  |   |                                         |   |                                               |   |                                                               |   |                              |   |                                      |
| 2        | Complete                                                      |                                                 |                                                                                                                                                                                                                                                                                                                                                                                                                                                       |          |  |   |                                         |   |                                               |   |                                                               |   |                              |   |                                      |
